# Supplementary material for: GWAS for urinary sodium and potassium excretion highlights pathways shared with cardiovascular traits
Source: Nat Commun. 2019 Aug 13;10:3653. doi: 10.1038/s41467-019-11451-y (PMC6692500; doi:10.1038/s41467-019-11451-y)
Supplement: Supplementary file 1 — Supplementary Dataset 1 [file 41467_2019_11451_MOESM1_ESM.xlsx]

## Sheet: Supplementary Data 1
Supplementary Data 1: Genome-wide association results for urinary sodium excretion at P<1*10-8.
SNP	CHR	BP	GENPOS	ALLELE1	ALLELE0	A1FREQ	INFO	CHISQ_LINREG	P_LINREG	BETA	SE	CHISQ_BOLT_LMM_INF	P_BOLT_LMM_INF	Chr_Pos_A1_A2	LeadSNP
rs838133	19	49259529	0	A	G	0.450813	0.938588	87.783	7.3e-21	-0.0133353	0.00127931	108.657	1.9e-25	19_49259529_A_G	rs838133
rs2472297	15	75027880	0	C	T	0.737388	1	95.6584	1.4e-22	0.0138093	0.0014017	97.0586	6.7e-23	15_75027880_C_T	rs2472297
rs11642015	16	53802494	0	C	T	0.596261	0.99969	87.9728	6.6e-21	-0.0124196	0.0012606	97.0651	6.7e-23	16_53802494_C_T	rs11642015
rs62048402	16	53803223	0	G	A	0.596283	0.999642	87.4777	8.5e-21	-0.0123859	0.00126063	96.5339	8.8e-23	16_53803223_G_A	rs11642015
rs1558902	16	53803574	0	T	A	0.596268	0.999664	87.436	8.7e-21	-0.0123837	0.00126062	96.5017	8.9e-23	16_53803574_T_A	rs11642015
rs55872725	16	53809123	0	C	T	0.596275	0.999746	87.449	8.6e-21	-0.0123801	0.00126051	96.4614	9.1e-23	16_53809123_C_T	rs11642015
rs56094641	16	53806453	0	A	G	0.595287	0.999523	86.702	1.3e-20	-0.0123371	0.00126014	95.8492	1.2e-22	16_53806453_A_G	rs11642015
rs1421085	16	53800954	0	T	C	0.596473	1	86.8838	1.2e-20	-0.0123359	0.00126053	95.7713	1.3e-22	16_53800954_T_C	rs11642015
rs8047587	16	53798622	0	G	T	0.560589	0.995839	87.031	1.1e-20	-0.0120777	0.0012478	93.6876	3.7e-22	16_53798622_G_T	rs11642015
rs9923544	16	53801985	0	C	T	0.576426	0.999786	84.7018	3.5e-20	-0.0121056	0.00125163	93.5452	4e-22	16_53801985_C_T	rs11642015
rs1558901	16	53803187	0	A	T	0.576404	0.999522	84.6386	3.6e-20	-0.0121002	0.00125168	93.4546	4.2e-22	16_53803187_A_T	rs11642015
rs1121980	16	53809247	0	G	A	0.57611	1	84.6198	3.6e-20	-0.0120827	0.00125132	93.239	4.6e-22	16_53809247_G_A	rs11642015
rs11075985	16	53805207	0	C	A	0.575404	0.999411	84.0886	4.7e-20	-0.0120653	0.00125132	92.9696	5.3e-22	16_53805207_C_A	rs11642015
rs1421086	16	53801343	0	C	A	0.576614	0.999895	84.2068	4.5e-20	-0.0120653	0.0012516	92.9281	5.4e-22	16_53801343_C_A	rs11642015
rs9923147	16	53801549	0	C	T	0.576611	0.999882	84.1835	4.5e-20	-0.0120636	0.0012516	92.9009	5.5e-22	16_53801549_C_T	rs11642015
rs9939973	16	53800568	0	G	A	0.576626	0.999897	84.0296	4.9e-20	-0.0120526	0.00125162	92.7296	6e-22	16_53800568_G_A	rs11642015
rs9940278	16	53800200	0	C	T	0.57664	0.999798	83.9822	5e-20	-0.0120507	0.00125168	92.6917	6.1e-22	16_53800200_C_T	rs11642015
rs9940646	16	53800629	0	C	G	0.576622	0.999902	84.0043	4.9e-20	-0.0120506	0.00125161	92.6999	6.1e-22	16_53800629_C_G	rs11642015
rs9930333	16	53799977	0	T	G	0.576624	0.999781	83.8887	5.2e-20	-0.0120465	0.00125167	92.6274	6.3e-22	16_53799977_T_G	rs11642015
rs9930397	16	53799985	0	T	A	0.576624	0.999781	83.8926	5.2e-20	-0.0120468	0.00125168	92.631	6.3e-22	16_53799985_T_A	rs11642015
rs9937053	16	53799507	0	G	A	0.575751	0.999538	83.5921	6.1e-20	-0.0120315	0.00125143	92.4341	7e-22	16_53799507_G_A	rs11642015
rs9940128	16	53800754	0	G	A	0.576525	1	83.7182	5.7e-20	-0.0120294	0.00125171	92.3588	7.2e-22	16_53800754_G_A	rs11642015
rs9937354	16	53799847	0	G	A	0.575798	0.999448	83.4647	6.5e-20	-0.0120257	0.00125151	92.3328	7.3e-22	16_53799847_G_A	rs11642015
rs9928094	16	53799905	0	A	G	0.575794	0.999458	83.3292	6.9e-20	-0.0120169	0.0012515	92.1976	7.8e-22	16_53799905_A_G	rs11642015
rs7193144	16	53810686	0	T	C	0.60499	0.999227	81.5538	1.7e-19	-0.0120438	0.00126547	90.5788	1.8e-21	16_53810686_T_C	rs11642015
rs7187250	16	53810546	0	C	A	0.605419	0.998939	81.103	2.1e-19	-0.0120302	0.00126594	90.3066	2e-21	16_53810546_C_A	rs11642015
rs9972653	16	53814363	0	G	T	0.600455	0.996439	81.5238	1.7e-19	-0.012012	0.00126502	90.1643	2.2e-21	16_53814363_G_T	rs11642015
rs62033399	16	53810943	0	C	T	0.605097	0.999216	81.0152	2.2e-19	-0.0120062	0.00126554	90.0032	2.4e-21	16_53810943_C_T	rs11642015
rs62033400	16	53811788	0	A	G	0.605032	0.998962	79.9678	3.8e-19	-0.0119421	0.00126552	89.0481	3.9e-21	16_53811788_A_G	rs11642015
rs8043757	16	53813450	0	A	T	0.60469	0.999742	79.6007	4.6e-19	-0.0118998	0.00126497	88.4937	5.1e-21	16_53813450_A_T	rs11642015
rs17817497	16	53815435	0	T	C	0.605708	0.999418	79.3318	5.3e-19	-0.0118906	0.00126569	88.2576	5.7e-21	16_53815435_T_C	rs11642015
rs8063057	16	53812433	0	T	C	0.603828	0.999157	79.0184	6.2e-19	-0.0118709	0.00126473	88.099	6.2e-21	16_53812433_T_C	rs11642015
rs8051591	16	53816752	0	A	G	0.60496	0.999855	78.861	6.7e-19	-0.0118613	0.00126512	87.9031	6.9e-21	16_53816752_A_G	rs11642015
rs8050136	16	53816275	0	C	A	0.605002	1	78.679	7.3e-19	-0.0118405	0.00126508	87.5999	8e-21	16_53816275_C_A	rs11642015
rs17817449	16	53813367	0	T	G	0.60476	1	78.4016	8.4e-19	-0.0118174	0.00126493	87.2803	9.4e-21	16_53813367_T_G	rs11642015
rs9935401	16	53816838	0	G	A	0.605298	0.999874	77.9696	1e-18	-0.0118157	0.00126531	87.2017	9.8e-21	16_53816838_G_A	rs11642015
rs1260326	2	27730940	0	T	C	0.395664	1	86.9993	1.1e-20	0.0117743	0.00126163	87.0982	1e-20	2_27730940_T_C	rs1260326
rs66908032	16	53822142	0	C	A	0.605522	0.999804	76.9546	1.7e-18	-0.0117422	0.00126547	86.0983	1.7e-20	16_53822142_C_A	rs11642015
rs72803697	16	53822183	0	C	T	0.605512	0.999827	76.9151	1.8e-18	-0.0117383	0.00126545	86.0446	1.8e-20	16_53822183_C_T	rs11642015
rs62033403	16	53822237	0	A	G	0.60552	0.999754	76.8589	1.8e-18	-0.0117352	0.00126549	85.9921	1.8e-20	16_53822237_A_G	rs11642015
rs62033404	16	53822239	0	A	G	0.605513	0.999776	76.8934	1.8e-18	-0.0117377	0.00126548	86.0312	1.8e-20	16_53822239_A_G	rs11642015
rs7206122	16	53822440	0	G	A	0.605545	0.99973	76.9051	1.8e-18	-0.0117361	0.00126548	86.0077	1.8e-20	16_53822440_G_A	rs11642015
rs7190396	16	53822502	0	T	G	0.605535	0.999742	76.9083	1.8e-18	-0.0117373	0.00126547	86.0266	1.8e-20	16_53822502_T_G	rs11642015
rs3751814	16	53818724	0	G	A	0.605396	0.999878	76.6284	2.1e-18	-0.0117254	0.00126529	85.8757	1.9e-20	16_53818724_G_A	rs11642015
rs56313538	16	53818834	0	A	G	0.605438	0.999753	76.6428	2e-18	-0.0117285	0.00126539	85.9081	1.9e-20	16_53818834_A_G	rs11642015
rs9936385	16	53819169	0	T	C	0.605444	0.999739	76.6174	2.1e-18	-0.0117254	0.00126544	85.8569	1.9e-20	16_53819169_T_C	rs11642015
rs9923233	16	53819198	0	G	C	0.605445	0.999738	76.6182	2.1e-18	-0.0117254	0.00126544	85.8562	1.9e-20	16_53819198_G_C	rs11642015
rs9939609	16	53820527	0	T	A	0.605441	1	76.703	2e-18	-0.0117274	0.00126537	85.8941	1.9e-20	16_53820527_T_A	rs11642015
rs7185735	16	53822651	0	A	G	0.60552	0.999774	76.816	1.9e-18	-0.0117304	0.00126547	85.9249	1.9e-20	16_53822651_A_G	rs11642015
rs9923312	16	53819367	0	G	A	0.605424	0.999845	76.6093	2.1e-18	-0.0117233	0.00126536	85.8356	2e-20	16_53819367_G_A	rs11642015
rs11075988	16	53819771	0	G	A	0.605435	0.999873	76.5997	2.1e-18	-0.0117197	0.00126537	85.7816	2e-20	16_53819771_G_A	rs11642015
rs11075992	16	53820066	0	T	C	0.605454	0.999899	76.6344	2.1e-18	-0.0117221	0.00126538	85.8153	2e-20	16_53820066_T_C	rs11642015
rs9926289	16	53820503	0	G	A	0.605458	0.999979	76.6475	2e-18	-0.0117217	0.00126535	85.8149	2e-20	16_53820503_G_A	rs11642015
rs7206410	16	53821297	0	T	C	0.605459	0.999962	76.6702	2e-18	-0.0117221	0.00126536	85.8188	2e-20	16_53821297_T_C	rs11642015
rs62033405	16	53822387	0	C	T	0.606388	0.999558	76.4256	2.3e-18	-0.0117109	0.00126591	85.5802	2.2e-20	16_53822387_C_T	rs11642015
rs11075989	16	53819877	0	C	T	0.605454	0.99983	76.3719	2.3e-18	-0.011702	0.00126541	85.518	2.3e-20	16_53819877_C_T	rs11642015
rs11075990	16	53819893	0	A	G	0.605454	0.999831	76.3724	2.3e-18	-0.011702	0.00126541	85.5181	2.3e-20	16_53819893_A_G	rs11642015
rs11075991	16	53819937	0	A	T	0.605458	0.99983	76.3799	2.3e-18	-0.0117027	0.00126542	85.5275	2.3e-20	16_53819937_A_T	rs11642015
rs7202116	16	53821615	0	A	G	0.605396	1	76.4142	2.3e-18	-0.0117025	0.00126532	85.5382	2.3e-20	16_53821615_A_G	rs11642015
rs7202296	16	53821690	0	A	G	0.605402	0.999984	76.4065	2.3e-18	-0.0117013	0.00126532	85.5196	2.3e-20	16_53821690_A_G	rs11642015
rs9927317	16	53820996	0	C	G	0.606051	0.998969	75.9249	2.9e-18	-0.0116937	0.00126578	85.3473	2.5e-20	16_53820996_C_G	rs11642015
rs17817712	16	53821125	0	A	G	0.606381	0.999648	76.1088	2.7e-18	-0.011694	0.00126588	85.3371	2.5e-20	16_53821125_A_G	rs11642015
rs79994966	16	53823727	0	T	C	0.606402	0.999685	75.8473	3.1e-18	-0.0116717	0.0012659	85.0099	3e-20	16_53823727_T_C	rs11642015
rs3751812	16	53818460	0	G	T	0.606234	1	75.649	3.4e-18	-0.0116642	0.00126574	84.9226	3.1e-20	16_53818460_G_T	rs11642015
rs1231281	19	49239200	0	G	A	0.500466	0.997463	62.6583	2.5e-15	0.0113802	0.00123661	84.6903	3.5e-20	19_49239200_G_A	rs838133
rs17817964	16	53828066	0	C	T	0.606476	0.998949	75.6244	3.4e-18	-0.0116453	0.00126629	84.5741	3.7e-20	16_53828066_C_T	rs11642015
rs418464	19	49239026	0	T	C	0.500092	0.997921	62.5136	2.6e-15	0.0113615	0.00123668	84.4031	4e-20	19_49239026_T_C	rs838133
rs62033408	16	53827962	0	A	G	0.606396	0.999124	75.3595	3.9e-18	-0.0116229	0.0012662	84.2606	4.3e-20	16_53827962_A_G	rs11642015
rs10468280	16	53827479	0	A	G	0.606409	0.999249	75.2798	4.1e-18	-0.0116159	0.00126611	84.1717	4.5e-20	16_53827479_A_G	rs11642015
rs973579	19	49241976	0	A	G	0.500094	0.998485	62.2451	3e-15	0.0113291	0.00123626	83.9793	5e-20	19_49241976_A_G	rs838133
rs838144	19	49250239	0	C	T	0.500385	0.99223	61.786	3.8e-15	-0.0113412	0.00123969	83.6925	5.8e-20	19_49250239_C_T	rs838133
rs838147	19	49246866	0	A	G	0.500742	0.996832	61.4415	4.6e-15	-0.0112936	0.00123697	83.359	6.8e-20	19_49246866_A_G	rs838133
rs380743	19	49241014	0	G	A	0.506088	0.987193	61.526	4.4e-15	0.0113287	0.00124334	83.0192	8.1e-20	19_49241014_G_A	rs838133
rs9933509	16	53818167	0	T	C	0.585998	0.999622	74.0628	7.6e-18	-0.0114324	0.00125545	82.924	8.5e-20	16_53818167_T_C	rs11642015
rs452270	19	49239053	0	T	C	0.503288	0.989833	61.7772	3.8e-15	0.0113024	0.0012414	82.8929	8.7e-20	19_49239053_T_C	rs838133
rs9931900	16	53818813	0	A	G	0.586001	0.99957	74	7.8e-18	-0.011429	0.0012555	82.8669	8.8e-20	16_53818813_A_G	rs11642015
rs7201850	16	53821862	0	C	T	0.586124	0.999863	74.1247	7.3e-18	-0.0114234	0.00125546	82.7912	9.1e-20	16_53821862_C_T	rs11642015
rs9937709	16	53820813	0	A	G	0.586046	0.999741	73.9418	8e-18	-0.0114165	0.00125549	82.687	9.6e-20	16_53820813_A_G	rs11642015
rs7206629	16	53821413	0	T	C	0.586086	0.999875	73.9143	8.2e-18	-0.0114113	0.00125543	82.6202	9.9e-20	16_53821413_T_C	rs11642015
rs8047395	16	53798523	0	G	A	0.498365	0.992199	81.9075	1.4e-19	-0.0112699	0.00124019	82.5781	1e-19	16_53798523_G_A	rs11642015
rs427248	19	49241015	0	C	T	0.506113	0.98754	60.9864	5.7e-15	0.0112957	0.0012431	82.5682	1e-19	19_49241015_C_T	rs838133
rs2470893	15	75019449	0	C	T	0.670162	1	75.3401	4e-18	0.0118877	0.00131307	81.9632	1.4e-19	15_75019449_C_T	rs2472297
rs62033406	16	53824226	0	A	G	0.589592	0.997623	75.2264	4.2e-18	-0.0113825	0.00125736	81.9514	1.4e-19	16_53824226_A_G	rs11642015
rs28567725	16	53826028	0	T	C	0.586875	0.999703	73.3665	1.1e-17	-0.0113706	0.00125578	81.9855	1.4e-19	16_53826028_T_C	rs11642015
rs780094	2	27741237	0	T	C	0.384608	1	84.3219	4.2e-20	0.0114684	0.00126804	81.7974	1.5e-19	2_27741237_T_C	rs1260326
rs17817288	16	53807764	0	A	G	0.516585	0.997744	79.443	5e-19	-0.0111825	0.00123768	81.631	1.6e-19	16_53807764_A_G	rs11642015
rs9941349	16	53825488	0	C	T	0.587123	1	72.7835	1.4e-17	-0.0113315	0.00125577	81.4251	1.8e-19	16_53825488_C_T	rs11642015
rs9931494	16	53827179	0	C	G	0.587037	0.999336	72.8521	1.4e-17	-0.0113259	0.00125598	81.3172	1.9e-19	16_53827179_C_G	rs11642015
rs8055197	16	53803156	0	G	A	0.497672	0.99761	78.4966	8e-19	-0.011102	0.00123733	80.5068	2.9e-19	16_53803156_G_A	rs11642015
rs1861866	16	53804340	0	C	T	0.497623	0.997764	78.3088	8.8e-19	-0.0110874	0.00123726	80.3044	3.2e-19	16_53804340_C_T	rs11642015
rs4665972	2	27598097	0	T	C	0.395483	0.986762	79.3901	5.1e-19	0.0113547	0.0012692	80.0365	3.7e-19	2_27598097_T_C	rs1260326
rs9922047	16	53806280	0	C	G	0.496662	0.997802	77.8859	1.1e-18	-0.0110636	0.00123721	79.967	3.8e-19	16_53806280_C_G	rs11642015
rs10852521	16	53804965	0	T	C	0.49661	0.997602	77.8342	1.1e-18	-0.0110614	0.00123728	79.9255	3.9e-19	16_53804965_T_C	rs11642015
rs439523	19	49236102	0	T	C	0.469702	0.997921	57.1928	4e-14	0.0110709	0.00123892	79.8513	4e-19	19_49236102_T_C	rs838133
rs780093	2	27742603	0	T	C	0.384622	1	82.0372	1.3e-19	0.0113159	0.00126811	79.6271	4.5e-19	2_27742603_T_C	rs1260326
rs12979278	19	49218602	0	C	T	0.453726	0.99309	57.7977	2.9e-14	0.0110469	0.0012454	78.6794	7.3e-19	19_49218602_C_T	rs838133
rs12978750	19	49218430	0	A	G	0.452526	0.993452	57.4749	3.4e-14	0.01104	0.00124571	78.5418	7.8e-19	19_49218430_A_G	rs838133
rs12978752	19	49218437	0	A	C	0.452516	0.993428	57.4451	3.5e-14	0.0110381	0.00124572	78.5131	7.9e-19	19_49218437_A_C	rs838133
rs33988101	19	49218111	0	G	T	0.452527	0.993747	57.4261	3.5e-14	0.0110328	0.00124553	78.4626	8.2e-19	19_49218111_G_T	rs838133
rs4002471	19	49215095	0	C	T	0.452115	0.994786	56.8781	4.6e-14	0.0109923	0.00124506	77.9464	1.1e-18	19_49215095_C_T	rs838133
rs2287922	19	49232226	0	G	A	0.464212	1	55.7982	8e-14	0.010863	0.00123948	76.8114	1.9e-18	19_49232226_G_A	rs838133
rs11672900	19	49220323	0	A	G	0.455833	0.994585	55.3702	1e-13	0.0108688	0.00124396	76.3396	2.4e-18	19_49220323_A_G	rs838133
rs7188250	16	53834607	0	T	C	0.58487	0.998611	65.6155	5.5e-16	-0.0109534	0.00125566	76.0938	2.7e-18	16_53834607_T_C	rs11642015
rs11882796	19	49225766	0	A	T	0.458163	0.997444	55.3419	1e-13	0.0108209	0.00124174	75.9384	2.9e-18	19_49225766_A_T	rs838133
rs660745	19	49219459	0	T	C	0.455112	0.994003	53.7687	2.3e-13	0.0107965	0.00124408	75.3118	4e-18	19_49219459_T_C	rs838133
rs12149832	16	53842908	0	G	A	0.587312	1	65.3617	6.2e-16	-0.0108919	0.00125568	75.2396	4.2e-18	16_53842908_G_A	rs11642015
rs72805613	16	53837342	0	A	G	0.586676	0.99938	65.3541	6.3e-16	-0.0108844	0.00125587	75.1139	4.4e-18	16_53837342_A_G	rs11642015
rs11666792	19	49227043	0	G	A	0.463343	0.998792	54.5295	1.5e-13	0.0107465	0.00123978	75.1355	4.4e-18	19_49227043_G_A	rs838133
rs12979891	19	49227256	0	C	T	0.463339	0.999004	54.5103	1.5e-13	0.0107422	0.00123967	75.0887	4.5e-18	19_49227256_C_T	rs838133
rs8112983	19	49229525	0	T	C	0.46311	0.999391	54.3977	1.6e-13	0.010738	0.00123934	75.0691	4.5e-18	19_49229525_T_C	rs838133
rs12149574	16	53840525	0	C	G	0.586772	0.999419	65.2602	6.6e-16	-0.0108762	0.00125572	75.0189	4.7e-18	16_53840525_C_G	rs11642015
rs11878908	19	49227443	0	C	T	0.463131	0.999136	54.2476	1.8e-13	0.0107298	0.00123962	74.9211	4.9e-18	19_49227443_C_T	rs838133
rs2287921	19	49228272	0	T	C	0.463202	1	53.9626	2e-13	0.0107054	0.00123916	74.6361	5.7e-18	19_49228272_T_C	rs838133
rs72805612	16	53834608	0	G	A	0.586996	0.999264	64.7757	8.4e-16	-0.0108509	0.00125628	74.6044	5.8e-18	16_53834608_G_A	rs11642015
rs72805611	16	53831354	0	C	T	0.58688	0.999558	64.7554	8.5e-16	-0.0108381	0.00125611	74.4464	6.2e-18	16_53831354_C_T	rs11642015
rs11075993	16	53837144	0	G	T	0.587034	0.999367	64.5906	9.2e-16	-0.010829	0.00125608	74.3266	6.6e-18	16_53837144_G_T	rs11642015
rs62033413	16	53830055	0	C	G	0.586883	0.999158	64.4672	9.8e-16	-0.0108134	0.00125636	74.0796	7.5e-18	16_53830055_C_G	rs11642015
rs34783010	19	46180414	0	G	T	0.805604	1	79.9576	3.8e-19	0.0134311	0.00156083	74.0476	7.6e-18	19_46180414_G_T	rs34783010
rs35107470	15	74817689	0	A	G	0.67745	0.942692	67.2415	2.4e-16	0.0116807	0.0013603	73.7343	8.9e-18	15_74817689_A_G	rs2472297
rs8057044	16	53812614	0	G	A	0.523372	0.996911	69.6616	7e-17	-0.01064	0.00123932	73.7076	9.1e-18	16_53812614_G_A	rs11642015
rs1800437	19	46181392	0	G	C	0.805575	1	79.6847	4.4e-19	0.0133884	0.00156002	73.6545	9.3e-18	19_46181392_G_C	rs34783010
rs2504671	6	51205577	0	C	A	0.765267	0.995478	75.108	4.5e-18	0.0125233	0.00146135	73.4392	1e-17	6_51205577_C_A	rs2504671
rs2238691	19	46179043	0	G	A	0.805582	0.998633	79.2907	5.4e-19	0.0133749	0.00156108	73.4059	1.1e-17	19_46179043_G_A	rs34783010
rs11672660	19	46180184	0	C	T	0.805598	0.99966	79.03	6.1e-19	0.0133457	0.0015604	73.1485	1.2e-17	19_46180184_C_T	rs34783010
rs1327285	6	51246947	0	A	G	0.765311	0.997649	74.5954	5.8e-18	0.0124809	0.00146014	73.064	1.3e-17	6_51246947_A_G	rs2504671
rs2504706	6	51258579	0	T	C	0.765469	1	74.9731	4.8e-18	0.0124628	0.00145986	72.8803	1.4e-17	6_51258579_T_C	rs2504671
rs2465044	6	51248024	0	C	G	0.765218	0.998115	74.1182	7.4e-18	0.0124409	0.00145961	72.6483	1.5e-17	6_51248024_C_G	rs2504671
rs9933040	16	53830867	0	T	A	0.566258	0.999799	63.886	1.3e-15	-0.0106363	0.00124766	72.6755	1.5e-17	16_53830867_T_A	rs11642015
rs2504711	6	51236489	0	G	A	0.765201	0.997669	74.0531	7.6e-18	0.0124396	0.00145982	72.6121	1.6e-17	6_51236489_G_A	rs2504671
rs9932754	16	53830491	0	T	C	0.566348	0.999577	63.779	1.4e-15	-0.0106268	0.00124776	72.5344	1.6e-17	16_53830491_T_C	rs11642015
rs8103840	19	49254955	0	C	T	0.53242	0.977853	51.8741	5.9e-13	-0.0106561	0.00125063	72.6011	1.6e-17	19_49254955_C_T	rs838133
rs1409891	6	51230533	0	A	G	0.7652	0.997412	73.8633	8.4e-18	0.0124231	0.00145994	72.4091	1.7e-17	6_51230533_A_G	rs2504671
rs2465022	6	51232118	0	G	A	0.765195	0.997591	73.9541	8e-18	0.012431	0.00145983	72.5119	1.7e-17	6_51232118_G_A	rs2504671
rs9930501	16	53830452	0	A	G	0.566279	0.999637	63.7263	1.4e-15	-0.0106237	0.0012477	72.4986	1.7e-17	16_53830452_A_G	rs11642015
rs9922708	16	53831146	0	C	T	0.566516	0.999738	63.4199	1.7e-15	-0.0106111	0.00124781	72.3137	1.8e-17	16_53831146_C_T	rs11642015
rs2478884	6	51226900	0	G	T	0.765406	0.996417	73.8418	8.5e-18	0.0124233	0.0014611	72.2953	1.9e-17	6_51226900_G_T	rs2504671
rs2504714	6	51228395	0	G	A	0.765211	0.997115	73.718	9e-18	0.0124135	0.00146017	72.2738	1.9e-17	6_51228395_G_A	rs2504671
rs994270	6	51187787	0	C	G	0.765245	0.993483	73.5518	9.8e-18	0.0124193	0.00146248	72.1136	2e-17	6_51187787_C_G	rs2504671
rs9930506	16	53830465	0	A	G	0.566424	1	63.6709	1.5e-15	-0.0105957	0.00124733	72.1608	2e-17	16_53830465_A_G	rs11642015
rs2465017	6	51241141	0	A	G	0.765059	0.997719	73.551	9.8e-18	0.012388	0.00145956	72.0376	2.1e-17	6_51241141_A_G	rs2504671
rs10423928	19	46182304	0	T	A	0.805508	1	77.7508	1.2e-18	0.0132323	0.00156007	71.9421	2.2e-17	19_46182304_T_A	rs34783010
rs4410790	7	17284577	0	T	C	0.368736	1	76.7959	1.9e-18	0.0108651	0.00128176	71.8541	2.3e-17	7_17284577_T_C	rs4410790
rs11075987	16	53815161	0	T	G	0.506702	0.997662	69.7114	6.9e-17	-0.0104711	0.00123712	71.6407	2.6e-17	16_53815161_T_G	rs11642015
rs9922619	16	53831771	0	G	T	0.566855	1	62.9424	2.1e-15	-0.0105556	0.00124856	71.4742	2.8e-17	16_53831771_G_T	rs11642015
rs6968554	7	17287106	0	A	G	0.366489	0.998076	74.4652	6.2e-18	0.0107788	0.0012835	70.5258	4.5e-17	7_17287106_A_G	rs4410790
rs739320	19	49261368	0	T	C	0.394242	0.955683	53.4402	2.7e-13	-0.0108568	0.00129275	70.5305	4.5e-17	19_49261368_T_C	rs838133
rs2106727	7	17287998	0	A	G	0.366041	0.997848	74.4095	6.3e-18	0.0107743	0.00128392	70.4213	4.8e-17	7_17287998_A_G	rs4410790
rs6968865	7	17287269	0	A	T	0.372144	1	73.5553	9.8e-18	0.010529	0.00126608	69.1592	9.1e-17	7_17287269_A_T	rs4410790
rs11649091	16	53845169	0	T	G	0.567401	0.997185	60.0833	9.1e-15	-0.0103191	0.00124939	68.2171	1.5e-16	16_53845169_T_G	rs11642015
rs479486	19	49229323	0	G	A	0.446692	0.998912	46.7361	8.1e-12	0.0102563	0.00124291	68.0936	1.6e-16	19_49229323_G_A	rs838133
rs2287019	19	46202172	0	C	T	0.817043	0.984631	72.5865	1.6e-17	0.0131901	0.00160831	67.2596	2.4e-16	19_46202172_C_T	rs34783010
rs7206790	16	53797908	0	C	G	0.53227	0.981197	63.7423	1.4e-15	-0.0102434	0.00124957	67.2	2.5e-16	16_53797908_C_G	rs11642015
rs13010586	2	27817817	0	G	A	0.743886	0.999839	69.9283	6.2e-17	-0.0115567	0.00141466	66.7361	3.1e-16	2_27817817_G_A	rs1260326
rs12989678	2	27821482	0	C	T	0.743817	0.999725	69.4115	8e-17	-0.0115128	0.00141464	66.2323	4e-16	2_27821482_C_T	rs1260326
rs6760250	2	27812252	0	G	A	0.743757	0.999964	69.2113	8.8e-17	-0.011493	0.00141436	66.0305	4.4e-16	2_27812252_G_A	rs1260326
rs1919127	2	27801493	0	T	C	0.743748	1	68.7239	1.1e-16	-0.0114573	0.00141443	65.615	5.5e-16	2_27801493_T_C	rs1260326
rs10179872	2	27778572	0	G	A	0.743615	0.998857	68.9137	1e-16	-0.0114551	0.00141465	65.5688	5.6e-16	2_27778572_G_A	rs1260326
rs10169065	2	27778560	0	A	G	0.74361	0.99888	68.8765	1e-16	-0.0114526	0.00141464	65.5415	5.7e-16	2_27778560_A_G	rs1260326
rs7570476	2	27784658	0	C	T	0.743704	0.999373	68.7382	1.1e-16	-0.0114496	0.00141459	65.5112	5.8e-16	2_27784658_C_T	rs1260326
rs10208529	2	27786188	0	A	T	0.743706	0.999428	68.6911	1.2e-16	-0.0114462	0.00141456	65.475	5.9e-16	2_27786188_A_T	rs1260326
rs7577311	2	27793921	0	G	T	0.743707	0.999562	68.6853	1.2e-16	-0.0114444	0.00141446	65.4639	5.9e-16	2_27793921_G_T	rs1260326
rs4665987	2	27755825	0	G	A	0.743406	0.998271	68.8857	1e-16	-0.0114348	0.00141465	65.3369	6.3e-16	2_27755825_G_A	rs1260326
rs12995461	2	27778167	0	A	C	0.743692	0.998957	68.5254	1.3e-16	-0.011428	0.00141478	65.2468	6.6e-16	2_27778167_A_C	rs1260326
rs4665382	2	27783801	0	T	C	0.743782	0.999368	68.3997	1.3e-16	-0.011427	0.00141474	65.2402	6.6e-16	2_27783801_T_C	rs1260326
rs4665988	2	27761436	0	C	A	0.743409	0.998394	68.7572	1.1e-16	-0.0114245	0.00141458	65.225	6.7e-16	2_27761436_C_A	rs1260326
rs4665383	2	27791555	0	C	G	0.743782	0.999582	68.365	1.4e-16	-0.0114224	0.0014146	65.2001	6.8e-16	2_27791555_C_G	rs1260326
rs13022873	2	27815510	0	A	C	0.743303	1	68.3016	1.4e-16	-0.0114107	0.00141511	65.0193	7.4e-16	2_27815510_A_C	rs1260326
rs3749147	2	27851918	0	G	A	0.748204	1	67.457	2.2e-16	-0.0114685	0.00142245	65.0041	7.5e-16	2_27851918_G_A	rs1260326
rs12473139	2	27765587	0	T	C	0.743276	0.998437	68.4129	1.3e-16	-0.0113957	0.0014143	64.9236	7.8e-16	2_27765587_T_C	rs1260326
rs1919128	2	27801759	0	A	G	0.743761	1	68.0519	1.6e-16	-0.0113912	0.00141429	64.873	8e-16	2_27801759_A_G	rs1260326
rs4666002	2	27840640	0	G	C	0.744047	0.999283	67.7164	1.9e-16	-0.0113873	0.00141519	64.7454	8.5e-16	2_27840640_G_C	rs1260326
rs4665991	2	27766284	0	G	A	0.743357	0.998555	68.115	1.5e-16	-0.0113746	0.00141442	64.6713	8.8e-16	2_27766284_G_A	rs1260326
rs12467476	2	27825715	0	T	C	0.744232	0.999558	67.8053	1.8e-16	-0.0113847	0.00141557	64.6812	8.8e-16	2_27825715_T_C	rs1260326
rs12464616	2	27827092	0	C	T	0.744282	0.999786	67.796	1.8e-16	-0.0113738	0.00141543	64.571	9.3e-16	2_27827092_C_T	rs1260326
rs12478841	2	27811722	0	A	G	0.745705	0.996719	67.5913	2e-16	-0.0114107	0.00142022	64.5527	9.4e-16	2_27811722_A_G	rs1260326
rs13002853	2	27853245	0	C	G	0.747943	0.998756	67.0572	2.6e-16	-0.0114237	0.00142254	64.4891	9.7e-16	2_27853245_C_G	rs1260326
rs2384656	2	27832055	0	A	G	0.744145	0.999367	67.481	2.1e-16	-0.0113416	0.00141546	64.2029	1.1e-15	2_27832055_A_G	rs1260326
rs13020949	2	27836605	0	C	T	0.744002	0.999678	67.2257	2.4e-16	-0.0113394	0.00141494	64.2251	1.1e-15	2_27836605_C_T	rs1260326
rs74175068	2	27833502	0	T	C	0.744077	0.999401	67.1911	2.5e-16	-0.0113317	0.00141527	64.1073	1.2e-15	2_27833502_T_C	rs1260326
rs34016998	2	27833687	0	C	T	0.744054	0.999739	66.9916	2.7e-16	-0.0113121	0.00141501	63.9101	1.3e-15	2_27833687_C_T	rs1260326
rs12987055	2	27834152	0	T	C	0.744058	1	66.8177	3e-16	-0.0113126	0.0014151	63.9066	1.3e-15	2_27834152_T_C	rs1260326
rs8044769	16	53839135	0	T	C	0.493782	1	59.9419	9.8e-15	-0.00973376	0.00121839	63.8251	1.4e-15	16_53839135_T_C	rs11642015
rs34502053	2	27854524	0	G	A	0.747875	0.999032	66.0626	4.4e-16	-0.0113345	0.00142235	63.5028	1.6e-15	2_27854524_G_A	rs1260326
rs12978499	19	49237552	0	A	C	0.58526	0.99752	45.7614	1.3e-11	-0.00999408	0.00125536	63.3791	1.7e-15	19_49237552_A_C	rs838133
rs12979144	19	49237547	0	G	A	0.585253	0.99752	45.7209	1.4e-11	-0.0099894	0.00125536	63.3202	1.8e-15	19_49237547_G_A	rs838133
rs8106205	19	49250197	0	T	C	0.556609	0.992027	46.1362	1.1e-11	-0.00988965	0.00124745	62.851	2.2e-15	19_49250197_T_C	rs838133
rs28400014	19	49250657	0	C	G	0.556079	0.991007	46.2175	1.1e-11	-0.00988165	0.00124775	62.7199	2.4e-15	19_49250657_C_G	rs838133
rs11667321	19	49250538	0	A	G	0.556547	0.991592	45.8118	1.3e-11	-0.00986368	0.0012477	62.4969	2.7e-15	19_49250538_A_G	rs838133
rs4665985	2	27753878	0	A	C	0.726899	0.977645	67.834	1.8e-16	-0.0110477	0.0014003	62.245	3e-15	2_27753878_A_C	rs1260326
rs281408	19	49233406	0	C	A	0.585496	1	44.3581	2.7e-11	-0.00984437	0.0012542	61.6087	4.2e-15	19_49233406_C_A	rs838133
rs412712	19	49234299	0	A	T	0.585375	0.999429	44.2375	2.9e-11	-0.00983388	0.00125443	61.4552	4.5e-15	19_49234299_A_T	rs838133
rs603985	19	49207257	0	T	C	0.46551	0.995591	39.6649	3e-10	0.00969479	0.00124187	60.9434	5.9e-15	19_49207257_T_C	rs838133
rs485073	19	49207255	0	A	G	0.465449	0.995572	39.4279	3.4e-10	0.00968152	0.00124184	60.7792	6.4e-15	19_49207255_A_G	rs838133
rs2272406	2	27892023	0	A	T	0.796569	0.998459	65.4526	6e-16	-0.0119544	0.00153454	60.6875	6.7e-15	2_27892023_A_T	rs1260326
rs13021208	2	27901728	0	C	T	0.796593	0.998307	65.3815	6.2e-16	-0.0119436	0.00153475	60.5611	7.1e-15	2_27901728_C_T	rs1260326
rs12998770	2	27913188	0	T	C	0.796544	0.997862	65.3583	6.2e-16	-0.0119417	0.00153489	60.5308	7.2e-15	2_27913188_T_C	rs1260326
rs485186	19	49207206	0	A	G	0.463545	1	39.2384	3.8e-10	0.00963964	0.00123939	60.4932	7.4e-15	19_49207206_A_G	rs838133
rs6547692	2	27734972	0	G	A	0.446049	0.996518	64.6742	8.8e-16	0.00964645	0.00124246	60.2797	8.2e-15	2_27734972_G_A	rs1260326
rs602662	19	49206985	0	G	A	0.464695	1	38.3994	5.8e-10	0.00956904	0.00123899	59.6483	1.1e-14	19_49206985_G_A	rs838133
rs12581220	12	78773251	0	C	T	0.685554	0.989622	61.0327	5.6e-15	0.01034	0.00133913	59.6207	1.2e-14	12_78773251_C_T	rs12581220
rs11646715	16	53824007	0	G	A	0.47591	0.998355	59.2087	1.4e-14	-0.00956445	0.0012393	59.5616	1.2e-14	16_53824007_G_A	rs11642015
rs13023094	2	27910706	0	A	C	0.79637	0.997897	64.0684	1.2e-15	-0.0118205	0.00153435	59.3505	1.3e-14	2_27910706_A_C	rs1260326
rs3751813	16	53818708	0	G	T	0.45559	0.998473	59.1491	1.5e-14	-0.00957096	0.00124213	59.371	1.3e-14	16_53818708_G_T	rs11642015
rs12316443	12	78810733	0	C	A	0.697271	0.987165	60.4139	7.7e-15	0.0104238	0.00135555	59.1313	1.5e-14	12_78810733_C_A	rs12581220
rs838145	19	49248730	0	G	A	0.457361	0.986765	38.6396	5.1e-10	-0.00959841	0.00124797	59.1546	1.5e-14	19_49248730_G_A	rs838133
rs10432705	2	27950837	0	G	A	0.792914	0.991571	64.9422	7.7e-16	-0.0117217	0.00152911	58.7634	1.8e-14	2_27950837_G_A	rs1260326
rs10948623	6	51418230	0	G	A	0.778838	0.996626	70.5018	4.6e-17	0.0114421	0.00149234	58.786	1.8e-14	6_51418230_G_A	rs2504671
rs12199064	6	51420188	0	G	A	0.778827	0.996953	70.3659	4.9e-17	0.0114292	0.00149206	58.6766	1.9e-14	6_51420188_G_A	rs2504671
rs56066508	19	49241400	0	C	T	0.570416	0.998175	40.8209	1.7e-10	-0.00953421	0.00124837	58.3289	2.2e-14	19_49241400_C_T	rs838133
rs1704773	19	49209566	0	A	G	0.468212	0.998842	37.0926	1.1e-09	0.00944541	0.00123907	58.11	2.5e-14	19_49209566_A_G	rs838133
rs2068834	2	27839539	0	T	C	0.729372	0.999193	61.5793	4.3e-15	-0.0105612	0.00138948	57.7729	2.9e-14	2_27839539_T_C	rs1260326
rs646327	19	49209851	0	A	G	0.47166	0.997813	37.7623	8e-10	0.00942464	0.00123947	57.8171	2.9e-14	19_49209851_A_G	rs838133
rs1260334	2	27748597	0	C	A	0.436357	0.999854	64.2764	1.1e-15	0.00945077	0.00124398	57.7172	3e-14	2_27748597_C_A	rs1260326
rs1260333	2	27748624	0	A	G	0.436377	1	64.3558	1e-15	0.00945457	0.00124395	57.7665	3e-14	2_27748624_A_G	rs1260326
rs4616435	2	27933642	0	C	T	0.794505	0.996453	63.6859	1.5e-15	-0.0116262	0.00153014	57.7318	3e-14	2_27933642_C_T	rs1260326
rs632111	19	49208978	0	A	G	0.466798	0.999741	36.9146	1.2e-09	0.00941083	0.00123886	57.7044	3e-14	19_49208978_A_G	rs838133
rs2389763	7	17307847	0	T	C	0.407679	0.99727	62.4161	2.8e-15	0.00956497	0.0012593	57.6907	3.1e-14	7_17307847_T_C	rs4410790
rs692854	19	49209464	0	C	A	0.46764	0.999076	36.7217	1.4e-09	0.00940876	0.00123908	57.6586	3.1e-14	19_49209464_C_A	rs838133
rs4666000	2	27839369	0	T	C	0.729358	0.999235	61.4311	4.6e-15	-0.0105468	0.00138944	57.6185	3.2e-14	2_27839369_T_C	rs1260326
rs780095	2	27741105	0	A	G	0.435694	0.998607	63.7648	1.4e-15	0.00943702	0.00124488	57.4662	3.4e-14	2_27741105_A_G	rs1260326
rs1313566	2	27748904	0	G	A	0.43633	0.996523	64.0531	1.2e-15	0.0094452	0.00124593	57.469	3.4e-14	2_27748904_G_A	rs1260326
rs2251034	19	49207792	0	G	A	0.466466	0.999601	36.6114	1.4e-09	0.00939196	0.00123897	57.4631	3.4e-14	19_49207792_G_A	rs838133
rs504963	19	49208865	0	G	A	0.466172	1	36.7185	1.4e-09	0.00939211	0.00123893	57.4692	3.4e-14	19_49208865_G_A	rs838133
rs6727388	2	27932587	0	A	G	0.79452	0.996847	63.3291	1.7e-15	-0.0115963	0.00152983	57.4587	3.5e-14	2_27932587_A_G	rs1260326
rs6727215	2	27934731	0	G	A	0.7946	0.996761	63.233	1.8e-15	-0.0115899	0.00153015	57.3709	3.6e-14	2_27934731_G_A	rs1260326
rs11109717	12	78811781	0	T	C	0.694924	0.989648	58.8268	1.7e-14	0.0102312	0.00135075	57.3731	3.6e-14	12_78811781_T_C	rs12581220
rs13030973	2	27928797	0	T	C	0.794374	0.996833	63.0476	2e-15	-0.0115711	0.00152948	57.2346	3.9e-14	2_27928797_T_C	rs1260326
rs507711	19	49208564	0	C	T	0.467143	0.996847	36.4048	1.6e-09	0.00938178	0.00124062	57.1863	4e-14	19_49208564_C_T	rs838133
rs2548459	19	49209339	0	T	C	0.466849	0.999045	36.4245	1.6e-09	0.00936486	0.00123932	57.1002	4.1e-14	19_49209339_T_C	rs838133
rs780096	2	27741072	0	C	G	0.43582	0.998334	63.5632	1.6e-15	0.00940456	0.0012449	57.0696	4.2e-14	2_27741072_C_G	rs1260326
rs507766	19	49208543	0	T	C	0.467169	0.996846	36.2815	1.7e-09	0.009369	0.0012406	57.0324	4.3e-14	19_49208543_T_C	rs838133
rs503279	19	49209010	0	T	C	0.465963	1	36.1682	1.8e-09	0.00935067	0.00123892	56.9634	4.4e-14	19_49209010_T_C	rs838133
rs571689	19	49207554	0	C	T	0.465843	0.999669	36.2418	1.7e-09	0.00934834	0.00123906	56.9222	4.5e-14	19_49207554_C_T	rs838133
rs570794	19	49207651	0	T	C	0.465845	0.999645	36.241	1.7e-09	0.00934853	0.00123908	56.923	4.5e-14	19_49207651_T_C	rs838133
rs569970	19	49207718	0	T	C	0.465848	0.99963	36.2569	1.7e-09	0.00935079	0.00123909	56.9498	4.5e-14	19_49207718_T_C	rs838133
rs507855	19	49208501	0	A	G	0.467118	0.996936	36.1566	1.8e-09	0.00935415	0.00124056	56.8557	4.7e-14	19_49208501_A_G	rs838133
rs633372	19	49209226	0	G	A	0.466557	0.999606	36.0842	1.9e-09	0.00934164	0.00123901	56.8459	4.7e-14	19_49209226_G_A	rs838133
rs12190153	6	51470372	0	G	C	0.773326	0.997715	67.287	2.3e-16	0.0111339	0.00147822	56.7308	5e-14	6_51470372_G_C	rs2504671
rs506897	19	49208629	0	G	C	0.465965	0.999864	35.9879	2e-09	0.00933171	0.00123895	56.7301	5e-14	19_49208629_G_C	rs838133
rs9381993	6	51472258	0	T	G	0.773319	0.997368	67.233	2.4e-16	0.0111296	0.00147844	56.6696	5.2e-14	6_51472258_T_G	rs2504671
rs2397047	6	51430842	0	A	G	0.775037	0.99771	68.2527	1.4e-16	0.011155	0.00148251	56.6167	5.3e-14	6_51430842_A_G	rs2504671
rs10807427	6	51462325	0	T	C	0.773509	0.998676	66.9803	2.7e-16	0.011116	0.00147804	56.5614	5.4e-14	6_51462325_T_C	rs2504671
rs12193744	6	51464929	0	A	G	0.773356	0.998684	66.9229	2.8e-16	0.011105	0.00147768	56.4773	5.7e-14	6_51464929_A_G	rs2504671
rs1477196	16	53808258	0	A	G	0.376471	1	61.2962	4.9e-15	-0.00958455	0.00127539	56.4749	5.7e-14	16_53808258_A_G	rs11642015
rs10948636	6	51466547	0	G	A	0.773373	0.99842	66.8519	2.9e-16	0.0110984	0.00147793	56.3921	5.9e-14	6_51466547_G_A	rs2504671
rs10948627	6	51431270	0	T	C	0.774434	0.999084	67.9054	1.7e-16	0.0111133	0.00148009	56.3775	6e-14	6_51431270_T_C	rs2504671
rs6928041	6	51462600	0	G	A	0.773375	0.99913	66.796	3e-16	0.0110915	0.0014774	56.3619	6e-14	6_51462600_G_A	rs2504671
rs12211863	6	51455331	0	A	T	0.77338	0.999246	66.7571	3.1e-16	0.0110886	0.00147733	56.3377	6.1e-14	6_51455331_A_T	rs2504671
rs12205800	6	51464718	0	C	T	0.773379	0.998686	66.7083	3.1e-16	0.0110863	0.00147775	56.2823	6.3e-14	6_51464718_C_T	rs2504671
rs12529828	6	51426492	0	A	G	0.774581	1	67.5471	2.1e-16	0.0110992	0.00147997	56.244	6.4e-14	6_51426492_A_G	rs2504671
rs7072776	10	22032942	0	A	G	0.278052	0.990286	55.5773	9e-14	0.0103876	0.00138554	56.2065	6.5e-14	10_22032942_A_G	rs7072776
rs584768	19	49213284	0	G	A	0.468403	0.99771	36.4506	1.6e-09	0.0092942	0.00123983	56.195	6.6e-14	19_49213284_G_A	rs838133
rs2638282	19	49213833	0	G	A	0.468483	0.99793	36.5135	1.5e-09	0.00929196	0.00123973	56.1775	6.6e-14	19_49213833_G_A	rs838133
rs2452170	19	49213504	0	G	A	0.468486	0.997739	36.3704	1.6e-09	0.00928094	0.00123983	56.0347	7.1e-14	19_49213504_G_A	rs838133
rs10948624	6	51429224	0	G	A	0.774618	0.999718	67.305	2.3e-16	0.0110764	0.00148015	55.9997	7.2e-14	6_51429224_G_A	rs2504671
rs6719175	2	27859351	0	T	A	0.730897	0.993349	58.7861	1.8e-14	-0.010424	0.00139556	55.7913	8.1e-14	2_27859351_T_A	rs1260326
rs12981072	19	49241006	0	C	G	0.564983	0.987466	38.6544	5.1e-10	-0.00934251	0.0012532	55.5761	9e-14	19_49241006_C_G	rs838133
rs676388	19	49211969	0	T	C	0.466586	1	36.0019	2e-09	0.00922614	0.00123879	55.4683	9.5e-14	19_49211969_T_C	rs838133
rs4506045	6	51441669	0	A	G	0.773717	0.997966	66.0591	4.4e-16	0.0110067	0.00147908	55.3769	9.9e-14	6_51441669_A_G	rs2504671
rs4997737	6	51434479	0	A	G	0.77373	0.998657	65.9204	4.7e-16	0.0109935	0.00147862	55.2786	1e-13	6_51434479_A_G	rs2504671
rs9367438	6	51434574	0	G	T	0.77373	0.998655	65.9189	4.7e-16	0.0109933	0.00147862	55.277	1e-13	6_51434574_G_T	rs2504671
rs9367439	6	51434622	0	G	C	0.773723	0.998616	65.9307	4.7e-16	0.0109948	0.00147863	55.291	1e-13	6_51434622_G_C	rs2504671
rs2397051	6	51435344	0	G	A	0.77373	0.998605	65.925	4.7e-16	0.010994	0.00147865	55.2818	1e-13	6_51435344_G_A	rs2504671
rs12214769	6	51435576	0	T	C	0.77373	0.998592	65.9247	4.7e-16	0.0109941	0.00147866	55.2816	1e-13	6_51435576_T_C	rs2504671
rs10948628	6	51437649	0	G	A	0.773713	0.998136	66.0631	4.4e-16	0.0109959	0.00147893	55.2802	1e-13	6_51437649_G_A	rs2504671
rs10948630	6	51437844	0	A	G	0.773722	0.998157	66.0267	4.4e-16	0.0109986	0.00147896	55.3046	1e-13	6_51437844_A_G	rs2504671
rs4489153	6	51437893	0	A	G	0.773641	0.99778	66.053	4.4e-16	0.011004	0.00147905	55.3526	1e-13	6_51437893_A_G	rs2504671
rs7450526	6	51441487	0	G	T	0.77371	0.997918	65.9582	4.6e-16	0.0109968	0.00147909	55.2769	1e-13	6_51441487_G_T	rs2504671
rs10807425	6	51443484	0	A	C	0.773721	0.998567	65.9716	4.6e-16	0.0109972	0.00147863	55.3155	1e-13	6_51443484_A_C	rs2504671
rs12446228	16	53800387	0	A	G	0.377789	0.997354	60.5204	7.3e-15	-0.00949246	0.00127573	55.3658	1e-13	16_53800387_A_G	rs11642015
rs10948629	6	51437685	0	A	C	0.773705	0.998121	66.019	4.5e-16	0.010992	0.00147894	55.2391	1.1e-13	6_51437685_A_C	rs2504671
rs12192154	6	51441399	0	C	T	0.773702	0.997815	65.9326	4.7e-16	0.0109949	0.00147906	55.2603	1.1e-13	6_51441399_C_T	rs2504671
rs4783819	16	53816647	0	G	C	0.376663	0.998274	60.485	7.4e-15	-0.00945611	0.00127574	54.9415	1.2e-13	16_53816647_G_C	rs11642015
rs2950835	2	27750545	0	A	G	0.436135	0.989894	61.6183	4.2e-15	0.00926339	0.00125002	54.9167	1.3e-13	2_27750545_A_G	rs1260326
rs2911711	2	27750546	0	T	A	0.436142	0.989869	61.6228	4.2e-15	0.00926391	0.00125004	54.9217	1.3e-13	2_27750546_T_A	rs1260326
rs726184	12	78820360	0	A	C	0.641209	0.992873	59.0591	1.5e-14	0.00958037	0.00129359	54.8496	1.3e-13	12_78820360_A_C	rs12581220
rs492602	19	49206417	0	A	G	0.492026	1	32.7216	1.1e-08	0.00915162	0.00123518	54.8955	1.3e-13	19_49206417_A_G	rs838133
rs2397050	6	51434250	0	C	A	0.77488	0.996717	65.2812	6.5e-16	0.0109678	0.0014828	54.7106	1.4e-13	6_51434250_C_A	rs2504671
rs816366	6	53995504	0	C	T	0.311488	0.998812	56.7837	4.9e-14	0.00987744	0.00133491	54.7498	1.4e-13	6_53995504_C_T	rs816366
rs10948622	6	51414804	0	A	T	0.788811	0.995241	65.1817	6.8e-16	0.0112142	0.00151843	54.5443	1.5e-13	6_51414804_A_T	rs2504671
rs7449475	6	51415450	0	A	T	0.788861	0.995338	65.2669	6.5e-16	0.0112227	0.00151848	54.623	1.5e-13	6_51415450_A_T	rs2504671
rs679574	19	49206108	0	C	G	0.491948	0.999784	32.4213	1.2e-08	0.00912074	0.00123524	54.5204	1.5e-13	19_49206108_C_G	rs838133
rs2307018	19	49244219	0	C	A	0.572252	0.999818	36.8043	1.3e-09	-0.00921843	0.00124831	54.534	1.5e-13	19_49244219_C_A	rs838133
rs516316	19	49206145	0	G	C	0.491945	0.999916	32.3735	1.3e-08	0.00911831	0.00123517	54.4978	1.6e-13	19_49206145_G_C	rs838133
rs681343	19	49206462	0	C	T	0.491961	1	32.3676	1.3e-08	0.00911211	0.00123502	54.4366	1.6e-13	19_49206462_C_T	rs838133
rs516246	19	49206172	0	C	T	0.491948	1	32.2551	1.4e-08	0.00910408	0.00123514	54.3297	1.7e-13	19_49206172_C_T	rs838133
rs2307019	19	49244220	0	G	A	0.572225	1	36.6257	1.4e-09	-0.00920236	0.00124831	54.3442	1.7e-13	19_49244220_G_A	rs838133
rs8111288	19	49247900	0	G	A	0.572623	0.996009	36.4634	1.6e-09	-0.00921932	0.0012505	54.3541	1.7e-13	19_49247900_G_A	rs838133
rs11672046	19	49247601	0	C	T	0.572605	0.996419	36.383	1.6e-09	-0.00920866	0.00125026	54.2492	1.8e-13	19_49247601_C_T	rs838133
rs8108136	19	49247693	0	C	T	0.572603	0.996288	36.3696	1.6e-09	-0.00920745	0.00125034	54.228	1.8e-13	19_49247693_C_T	rs838133
rs8108468	19	49247786	0	G	A	0.572609	0.996175	36.3658	1.6e-09	-0.00920747	0.0012504	54.2225	1.8e-13	19_49247786_G_A	rs838133
rs8111399	19	49247963	0	G	T	0.572621	0.995868	36.3936	1.6e-09	-0.0092119	0.00125057	54.2604	1.8e-13	19_49247963_G_T	rs838133
rs8111208	19	49248022	0	A	C	0.572627	0.995758	36.3998	1.6e-09	-0.00921265	0.00125063	54.2638	1.8e-13	19_49248022_A_C	rs838133
rs11083948	19	49248120	0	A	G	0.572644	0.995623	36.3564	1.6e-09	-0.00920984	0.00125073	54.2218	1.8e-13	19_49248120_A_G	rs838133
rs12611203	19	49248295	0	G	A	0.572637	0.995269	36.3408	1.7e-09	-0.00920845	0.00125093	54.1885	1.8e-13	19_49248295_G_A	rs838133
rs12611211	19	49248331	0	G	A	0.572674	0.995148	36.3786	1.6e-09	-0.0092105	0.00125099	54.207	1.8e-13	19_49248331_G_A	rs838133
rs12611201	19	49248255	0	G	A	0.572645	0.995368	36.3136	1.7e-09	-0.00920482	0.00125087	54.1506	1.9e-13	19_49248255_G_A	rs838133
rs6753534	2	27752871	0	C	T	0.435346	0.984171	60.4298	7.6e-15	0.00921548	0.00125362	54.0388	2e-13	2_27752871_C_T	rs1260326
rs816368	6	53996073	0	T	C	0.689058	0.998967	55.9548	7.4e-14	-0.00981207	0.00133561	53.9709	2e-13	6_53996073_T_C	rs816366
rs816369	6	53996086	0	T	C	0.689066	0.998937	56.0212	7.2e-14	-0.00981822	0.00133564	54.0365	2e-13	6_53996086_T_C	rs816366
rs12462324	19	49247086	0	A	G	0.572704	0.996985	36.2507	1.7e-09	-0.00918591	0.00124999	54.005	2e-13	19_49247086_A_G	rs838133
rs12460295	19	49247124	0	T	G	0.572699	0.996934	36.2335	1.8e-09	-0.00918409	0.00125002	53.9807	2e-13	19_49247124_T_G	rs838133
rs12982115	19	49248640	0	A	G	0.572754	0.994675	35.9162	2.1e-09	-0.00918014	0.00125125	53.8286	2.2e-13	19_49248640_A_G	rs838133
rs8104897	19	49249814	0	C	A	0.572491	0.992544	36.0494	1.9e-09	-0.00918138	0.00125244	53.7404	2.3e-13	19_49249814_C_A	rs838133
rs601338	19	49206674	0	G	A	0.49198	1	31.6501	1.8e-08	0.00904473	0.00123526	53.6134	2.4e-13	19_49206674_G_A	rs838133
rs631441	6	53994626	0	T	G	0.689784	0.99644	55.4725	9.5e-14	-0.00979289	0.00133815	53.5564	2.5e-13	6_53994626_T_G	rs816366
rs562626	6	53994634	0	A	G	0.689784	0.996442	55.468	9.5e-14	-0.00979247	0.00133815	53.5521	2.5e-13	6_53994634_A_G	rs816366
rs281379	19	49214274	0	G	A	0.476432	1	34.2402	4.9e-09	0.00905928	0.00123824	53.528	2.5e-13	19_49214274_G_A	rs838133
rs12975033	19	49249443	0	A	T	0.57198	0.993328	35.8818	2.1e-09	-0.00916034	0.00125184	53.5457	2.5e-13	19_49249443_A_T	rs838133
rs8102032	19	49249795	0	C	T	0.572502	0.992593	35.8995	2.1e-09	-0.00916668	0.00125242	53.5705	2.5e-13	19_49249795_C_T	rs838133
rs8105137	19	49249888	0	G	A	0.572504	0.992448	35.9017	2.1e-09	-0.00916492	0.00125249	53.5436	2.5e-13	19_49249888_G_A	rs838133
rs2081194	19	49263477	0	G	C	0.3991	0.9486	39.7275	2.9e-10	-0.00946168	0.00129358	53.5	2.6e-13	19_49263477_G_C	rs838133
rs4802503	19	49279628	0	G	A	0.440997	0.899465	44.0176	3.3e-11	0.00954922	0.00131022	53.1186	3.1e-13	19_49279628_G_A	rs838133
rs816372	6	53997693	0	A	C	0.688831	0.998431	55.0038	1.2e-13	-0.00971799	0.00133561	52.9414	3.4e-13	6_53997693_A_C	rs816366
rs28400015	19	49250633	0	G	A	0.57259	0.991336	35.3248	2.8e-09	-0.00911666	0.00125314	52.9259	3.5e-13	19_49250633_G_A	rs838133
rs74446114	2	28066122	0	T	C	0.822145	0.987492	55.7143	8.4e-14	-0.0117969	0.00162386	52.7759	3.7e-13	2_28066122_T_C	rs1260326
rs816380	6	54000755	0	T	C	0.68644	0.99803	54.0297	2e-13	-0.00968943	0.00133323	52.8189	3.7e-13	6_54000755_T_C	rs816366
rs2784187	6	51468139	0	T	C	0.416614	0.998236	49.995	1.5e-12	-0.00911772	0.00125589	52.7069	3.9e-13	6_51468139_T_C	rs2504671
rs77353560	2	28085544	0	C	A	0.823139	0.98992	55.5304	9.2e-14	-0.0117931	0.00162545	52.6393	4e-13	2_28085544_C_A	rs1260326
rs2579994	6	51454426	0	G	A	0.416333	0.999712	50.1855	1.4e-12	-0.00910619	0.00125533	52.6204	4e-13	6_51454426_G_A	rs2504671
rs2305929	2	28113911	0	A	G	0.823385	0.989306	55.2253	1.1e-13	-0.0117756	0.00162586	52.4566	4.4e-13	2_28113911_A_G	rs1260326
rs12318839	12	78776597	0	C	T	0.646129	1	58.2664	2.3e-14	0.00936325	0.00129407	52.3523	4.6e-13	12_78776597_C_T	rs12581220
rs792452	10	22154237	0	C	G	0.303657	0.992042	50.3286	1.3e-12	0.00975763	0.00134893	52.325	4.7e-13	10_22154237_C_G	rs7072776
rs35866622	19	49218060	0	C	T	0.50175	0.990855	33.0013	9.2e-09	0.00897482	0.0012414	52.2667	4.8e-13	19_49218060_C_T	rs838133
rs2478873	6	51266422	0	T	C	0.790867	0.993157	58.9799	1.6e-14	0.0110061	0.00152373	52.1733	5.1e-13	6_51266422_T_C	rs2504671
rs816376	6	54007349	0	C	G	0.6941	0.999083	53.4431	2.7e-13	-0.00968608	0.00134172	52.1161	5.2e-13	6_54007349_C_G	rs816366
rs12253527	10	21819824	0	G	A	0.67845	0.995048	48.5463	3.2e-12	-0.0095745	0.00132587	52.1469	5.2e-13	10_21819824_G_A	rs7072776
rs2784243	6	51454640	0	C	T	0.416685	0.999034	49.6757	1.8e-12	-0.00906135	0.00125564	52.0779	5.3e-13	6_51454640_C_T	rs2504671
rs2807978	10	22208630	0	T	C	0.289627	0.994721	51.4665	7.3e-13	0.00985251	0.00136582	52.0364	5.4e-13	10_22208630_T_C	rs7072776
rs11642841	16	53845487	0	C	A	0.602083	1	43.5333	4.2e-11	-0.00910492	0.00126289	51.9784	5.6e-13	16_53845487_C_A	rs11642015
rs499594	6	53975913	0	T	C	0.688182	0.998417	54.2121	1.8e-13	-0.00958015	0.00133483	51.5105	7.1e-13	6_53975913_T_C	rs816366
rs2754783	6	54016676	0	G	A	0.693586	0.998954	52.6365	4e-13	-0.00962016	0.00134119	51.45	7.3e-13	6_54016676_G_A	rs816366
rs843828	6	54042903	0	A	G	0.697349	0.99589	52.7275	3.8e-13	-0.00966647	0.00134768	51.4476	7.4e-13	6_54042903_A_G	rs816366
rs816377	6	54007585	0	T	A	0.693731	0.999147	52.7775	3.7e-13	-0.00961701	0.00134117	51.4179	7.5e-13	6_54007585_T_A	rs816366
rs1150877	6	54048682	0	A	C	0.697364	0.995283	52.6666	4e-13	-0.00966624	0.00134813	51.4107	7.5e-13	6_54048682_A_C	rs816366
rs1321886	6	54015155	0	T	C	0.693579	0.999057	52.5564	4.2e-13	-0.00961229	0.00134113	51.37	7.6e-13	6_54015155_T_C	rs816366
rs816374	6	54005663	0	A	G	0.694582	0.998977	52.6598	4e-13	-0.00962073	0.0013425	51.3557	7.7e-13	6_54005663_A_G	rs816366
rs2754782	6	54008414	0	G	A	0.694581	0.999533	52.4999	4.3e-13	-0.00961717	0.00134228	51.3344	7.8e-13	6_54008414_G_A	rs816366
rs1321885	6	54011675	0	A	C	0.693638	0.999035	52.5305	4.2e-13	-0.00960996	0.00134129	51.3332	7.8e-13	6_54011675_A_C	rs816366
rs2754781	6	54006259	0	A	C	0.693345	0.999026	52.6025	4.1e-13	-0.00960445	0.00134085	51.3078	7.9e-13	6_54006259_A_C	rs816366
rs2797424	6	54007820	0	C	A	0.6947	0.99933	52.5264	4.2e-13	-0.00961709	0.00134252	51.3149	7.9e-13	6_54007820_C_A	rs816366
rs843826	6	54005954	0	C	T	0.693503	0.999003	52.5852	4.1e-13	-0.00960322	0.00134107	51.2778	8e-13	6_54005954_C_T	rs816366
rs1342829	6	54027277	0	G	A	0.305911	0.99887	52.4743	4.4e-13	0.00960945	0.00134173	51.294	8e-13	6_54027277_G_A	rs816366
rs2754779	6	54002231	0	A	C	0.693293	0.997441	52.4653	4.4e-13	-0.0096057	0.00134166	51.2593	8.1e-13	6_54002231_A_C	rs816366
rs7190492	16	53828752	0	A	G	0.377504	0.998037	56.4477	5.8e-14	-0.00913064	0.00127543	51.2494	8.1e-13	16_53828752_A_G	rs11642015
rs4715446	6	54010651	0	A	T	0.6936	0.999331	52.441	4.4e-13	-0.0095992	0.00134123	51.2229	8.2e-13	6_54010651_A_T	rs816366
rs2797428	6	54016363	0	T	A	0.694739	0.999356	52.3517	4.6e-13	-0.00961014	0.00134256	51.2376	8.2e-13	6_54016363_T_A	rs816366
rs9474745	6	54022931	0	T	A	0.694804	0.99918	52.3284	4.7e-13	-0.00961065	0.00134271	51.232	8.2e-13	6_54022931_T_A	rs816366
rs2797427	6	54013635	0	C	T	0.694733	0.999567	52.3274	4.7e-13	-0.00960771	0.00134248	51.2179	8.3e-13	6_54013635_C_T	rs816366
rs1407233	6	54017126	0	T	G	0.694019	0.999069	52.3421	4.7e-13	-0.00959504	0.00134162	51.1489	8.6e-13	6_54017126_T_G	rs816366
rs33951980	7	73029437	0	C	T	0.870155	0.99729	47.6415	5.1e-12	0.0131522	0.00183904	51.1468	8.6e-13	7_73029437_C_T	rs33951980
rs768358	6	54021056	0	T	C	0.694082	0.998984	52.2969	4.8e-13	-0.00959316	0.00134171	51.1216	8.7e-13	6_54021056_T_C	rs816366
rs2797430	6	54003689	0	G	A	0.694573	0.999182	52.295	4.8e-13	-0.00959516	0.00134243	51.0882	8.8e-13	6_54003689_G_A	rs816366
rs2754790	6	54020121	0	C	T	0.69481	0.99922	52.1615	5.1e-13	-0.00959616	0.00134271	51.0772	8.9e-13	6_54020121_C_T	rs816366
rs1340661	6	54023382	0	T	G	0.306002	0.998809	52.2529	4.9e-13	0.00958553	0.00134168	51.0429	9e-13	6_54023382_T_G	rs816366
rs1321884	6	54003344	0	A	G	0.693322	0.998037	52.2364	4.9e-13	-0.00958228	0.00134146	51.025	9.1e-13	6_54003344_A_G	rs816366
rs816388	6	54034547	0	G	A	0.697474	0.996643	52.2153	5e-13	-0.00962405	0.00134738	51.0192	9.1e-13	6_54034547_G_A	rs816366
rs58800797	12	78785722	0	G	A	0.634737	0.994587	55.9108	7.6e-14	0.00919928	0.00128787	51.0225	9.1e-13	12_78785722_G_A	rs12581220
rs677434	6	53990039	0	G	A	0.688098	0.998991	53.5613	2.5e-13	-0.00953003	0.00133434	51.0101	9.2e-13	6_53990039_G_A	rs816366
rs12193888	6	54019288	0	A	G	0.694084	0.998998	52.1728	5.1e-13	-0.00958315	0.00134171	51.0151	9.2e-13	6_54019288_A_G	rs816366
rs7980124	12	78771681	0	G	A	0.638817	0.986838	52.7464	3.8e-13	0.0092496	0.0012956	50.9686	9.4e-13	12_78771681_G_A	rs12581220
rs2797429	6	54019943	0	C	T	0.693995	0.998816	52.0717	5.4e-13	-0.00957007	0.00134166	50.88	9.8e-13	6_54019943_C_T	rs816366
rs2797426	6	54013111	0	C	G	0.694566	0.999619	51.6723	6.6e-13	-0.00954504	0.00134224	50.5702	1.1e-12	6_54013111_C_G	rs816366
rs71556736	7	73034929	0	C	T	0.869802	0.995905	47.0147	7e-12	0.0130781	0.00183767	50.6474	1.1e-12	7_73034929_C_T	rs33951980
rs34060476	7	73037956	0	A	G	0.866484	0.995463	47.2036	6.4e-12	0.012941	0.0018192	50.6032	1.1e-12	7_73037956_A_G	rs33951980
rs4715447	6	54010681	0	G	A	0.694578	1	51.7104	6.4e-13	-0.00954491	0.00134301	50.511	1.2e-12	6_54010681_G_A	rs816366
rs1407234	6	54021179	0	C	A	0.694638	0.999252	51.6341	6.7e-13	-0.009544	0.00134246	50.5423	1.2e-12	6_54021179_C_A	rs816366
rs7784668	7	73045483	0	T	C	0.870728	0.99904	46.5635	8.9e-12	0.013077	0.00184203	50.399	1.3e-12	7_73045483_T_C	rs33951980
rs2478875	6	51283110	0	A	G	0.791192	0.992112	57.2285	3.9e-14	0.0108082	0.00152532	50.2095	1.4e-12	6_51283110_A_G	rs2504671
rs2504695	6	51288539	0	A	G	0.79123	0.992028	57.2228	3.9e-14	0.0108124	0.00152548	50.2378	1.4e-12	6_51288539_A_G	rs2504671
rs2478877	6	51288980	0	T	C	0.791227	0.992011	57.1832	4e-14	0.0108091	0.00152549	50.2064	1.4e-12	6_51288980_T_C	rs2504671
rs34958196	7	73043101	0	G	A	0.870411	1	46.4067	9.6e-12	0.0130293	0.00183976	50.1554	1.4e-12	7_73043101_G_A	rs33951980
rs34430945	7	73043665	0	T	C	0.870715	0.999243	46.4273	9.5e-12	0.013055	0.00184172	50.2464	1.4e-12	7_73043665_T_C	rs33951980
rs13234805	7	73049182	0	G	A	0.870818	0.996175	46.3639	9.8e-12	0.0130598	0.00184432	50.1416	1.4e-12	7_73049182_G_A	rs33951980
rs799166	7	73051932	0	C	G	0.870684	0.991458	46.5179	9.1e-12	0.01309	0.00184774	50.1881	1.4e-12	7_73051932_C_G	rs33951980
rs799165	7	73052057	0	T	A	0.870763	0.990507	46.5925	8.7e-12	0.0130985	0.00184839	50.2175	1.4e-12	7_73052057_T_A	rs33951980
rs1848968	12	78794166	0	C	T	0.640435	0.995181	54.7249	1.4e-13	0.00914634	0.00129154	50.1507	1.4e-12	12_78794166_C_T	rs12581220
rs4506043	6	51374756	0	T	C	0.814206	0.993844	58.4493	2.1e-14	0.0112528	0.00159409	49.8302	1.7e-12	6_51374756_T_C	rs2504671
rs13240065	7	73015369	0	G	A	0.871452	0.999134	46.5779	8.8e-12	0.0130295	0.00184532	49.8556	1.7e-12	7_73015369_G_A	rs33951980
rs10740991	10	22058137	0	G	C	0.282027	0.99681	47.2138	6.4e-12	0.00969378	0.00137586	49.6407	1.8e-12	10_22058137_G_C	rs7072776
rs1280851	6	54059217	0	T	C	0.706567	0.989471	51.8928	5.9e-13	-0.00960451	0.00136331	49.6322	1.9e-12	6_54059217_T_C	rs816366
rs1086899	10	22141442	0	T	C	0.288087	1	49.6031	1.9e-12	0.00960697	0.00136565	49.4873	2e-12	10_22141442_T_C	rs7072776
rs13235543	7	73013901	0	C	T	0.871307	0.999343	46.0228	1.2e-11	0.0129576	0.00184411	49.3713	2.1e-12	7_73013901_C_T	rs33951980
rs78815801	7	73045938	0	T	C	0.870928	0.998033	45.7672	1.3e-11	0.0129541	0.00184337	49.3845	2.1e-12	7_73045938_T_C	rs33951980
rs1861867	16	53848561	0	A	G	0.398564	0.90876	51.2091	8.3e-13	-0.00925638	0.00131704	49.3949	2.1e-12	16_53848561_A_G	rs11642015
rs9296653	6	51302901	0	A	G	0.791885	0.993124	56.0809	7e-14	0.0107185	0.00152664	49.2945	2.2e-12	6_51302901_A_G	rs2504671
rs2504716	6	51298497	0	C	T	0.791636	0.992274	55.8647	7.8e-14	0.0106927	0.00152657	49.0621	2.5e-12	6_51298497_C_T	rs2504671
rs7301847	12	78832826	0	G	A	0.694489	0.984444	48.9591	2.6e-12	0.00947445	0.00135234	49.0832	2.5e-12	12_78832826_G_A	rs12581220
rs2761589	11	31311429	0	C	G	0.370028	0.996017	48.4035	3.5e-12	-0.00897032	0.00128298	48.8854	2.7e-12	11_31311429_C_G	rs2761589
rs9932600	16	53800272	0	T	C	0.357883	0.996049	54.126	1.9e-13	-0.00902901	0.00129095	48.9175	2.7e-12	16_53800272_T_C	rs11642015
rs2754809	6	54070858	0	C	G	0.704883	0.986947	51.1655	8.5e-13	-0.00951725	0.00136253	48.7898	2.8e-12	6_54070858_C_G	rs816366
rs79624003	7	73012785	0	A	G	0.871405	0.999638	45.4285	1.6e-11	0.0128777	0.00184463	48.7368	2.9e-12	7_73012785_A_G	rs33951980
rs2985140	11	31315886	0	C	T	0.369461	0.995722	48.4849	3.3e-12	-0.00895901	0.00128345	48.7261	2.9e-12	11_31315886_C_T	rs2761589
rs3951780	10	22062729	0	T	G	0.28212	0.994141	47.5845	5.3e-12	0.00959565	0.00137702	48.5591	3.2e-12	10_22062729_T_G	rs7072776
rs1513481	3	35783535	0	C	T	0.689494	0.989656	39.3409	3.6e-10	-0.00933683	0.00134101	48.4768	3.3e-12	3_35783535_C_T	rs1513481
rs13006480	2	27987221	0	C	G	0.828032	0.987353	53.7112	2.3e-13	-0.0114467	0.00164577	48.3747	3.5e-12	2_27987221_C_G	rs1260326
rs35332062	7	73012042	0	G	A	0.872472	1	45.6655	1.4e-11	0.0128797	0.00185121	48.4063	3.5e-12	7_73012042_G_A	rs33951980
rs12670403	7	17309279	0	C	A	0.501049	1	50.2524	1.4e-12	0.00859466	0.00123608	48.3465	3.6e-12	7_17309279_C_A	rs4410790
rs13246993	7	73022746	0	G	A	0.871681	0.999197	44.1063	3.1e-11	0.0128353	0.00184652	48.3169	3.6e-12	7_73022746_G_A	rs33951980
rs13234131	7	73025975	0	A	G	0.871739	0.999461	44.3291	2.8e-11	0.0128391	0.00184684	48.3292	3.6e-12	7_73025975_A_G	rs33951980
rs11753647	6	51410511	0	T	C	0.792097	0.994502	60.4743	7.5e-15	0.010605	0.00152748	48.2028	3.8e-12	6_51410511_T_C	rs2504671
rs12201088	6	51412342	0	T	C	0.792094	0.994526	60.5127	7.3e-15	0.0106082	0.00152746	48.2331	3.8e-12	6_51412342_T_C	rs2504671
rs12201810	6	51409684	0	A	T	0.792103	0.994465	60.4474	7.6e-15	0.0106042	0.0015275	48.1942	3.9e-12	6_51409684_A_T	rs2504671
rs2774403	11	31320530	0	A	T	0.367993	0.995103	47.5147	5.5e-12	-0.00891648	0.00128465	48.1743	3.9e-12	11_31320530_A_T	rs2761589
rs13234378	7	73026151	0	A	T	0.871729	0.999492	44.1242	3.1e-11	0.0128081	0.00184673	48.1023	4e-12	7_73026151_A_T	rs33951980
rs10828266	10	22098701	0	A	G	0.284347	0.994174	45.9525	1.2e-11	0.00952913	0.00137374	48.1167	4e-12	10_22098701_A_G	rs7072776
rs12207656	6	51405556	0	C	T	0.792078	0.994196	60.2764	8.2e-15	0.0105924	0.00152761	48.0799	4.1e-12	6_51405556_C_T	rs2504671
rs12190013	6	51409917	0	G	A	0.792053	0.994137	60.2883	8.2e-15	0.0105862	0.00152763	48.0225	4.2e-12	6_51409917_G_A	rs2504671
rs3812316	7	73020337	0	C	G	0.871889	1	43.9011	3.5e-11	0.0127917	0.00184753	47.9373	4.4e-12	7_73020337_C_G	rs33951980
rs34062580	7	73033559	0	G	A	0.870944	0.996311	43.9793	3.3e-11	0.0127652	0.00184415	47.9136	4.5e-12	7_73033559_G_A	rs33951980
rs28469214	12	78795108	0	A	C	0.623427	0.994115	52.1493	5.1e-13	0.00885808	0.00127984	47.9037	4.5e-12	12_78795108_A_C	rs12581220
rs7082663	10	22088054	0	A	G	0.269998	0.995339	47.9377	4.4e-12	0.00965222	0.00139518	47.8621	4.6e-12	10_22088054_A_G	rs7072776
rs4788415	16	30439309	0	T	C	0.0966553	0.951989	55.84	7.9e-14	-0.0148019	0.00214015	47.8352	4.6e-12	16_30439309_T_C	rs4788415
rs9370030	6	51385945	0	T	C	0.81305	0.995309	56.7875	4.9e-14	0.010989	0.0015892	47.8148	4.7e-12	6_51385945_T_C	rs2504671
rs10950655	7	17308367	0	T	C	0.497311	0.99774	50.0693	1.5e-12	0.00855384	0.00123722	47.8	4.7e-12	7_17308367_T_C	rs4410790
rs9370032	6	51390998	0	T	C	0.813046	0.995143	56.6997	5.1e-14	0.0109828	0.00158923	47.7588	4.8e-12	6_51390998_T_C	rs2504671
rs13229619	7	73030175	0	G	A	0.87094	0.997183	43.8902	3.5e-11	0.0127429	0.00184345	47.7834	4.8e-12	7_73030175_G_A	rs33951980
rs12531256	7	17281820	0	C	T	0.498158	0.993866	49.9892	1.5e-12	0.00856171	0.00123918	47.737	4.9e-12	7_17281820_C_T	rs4410790
rs838134	19	49257739	0	A	C	0.722891	0.958518	40.7574	1.7e-10	-0.00973885	0.0014105	47.6724	5e-12	19_49257739_A_C	rs838133
rs9474744	6	54007719	0	A	C	0.684983	0.992237	49.8861	1.6e-12	-0.00921602	0.00133532	47.6341	5.1e-12	6_54007719_A_C	rs816366
rs4489213	7	17309180	0	G	A	0.500725	0.999516	49.6084	1.9e-12	0.00853102	0.00123639	47.6089	5.2e-12	7_17309180_G_A	rs4410790
rs499765	19	49266390	0	C	G	0.660396	0.973547	35.586	2.4e-09	-0.00910827	0.00132065	47.5657	5.3e-12	19_49266390_C_G	rs838133
rs13030345	2	28003174	0	G	T	0.828875	0.985793	51.9799	5.6e-13	-0.0113784	0.00165036	47.5343	5.4e-12	2_28003174_G_T	rs1260326
rs2183484	11	31259370	0	G	A	0.632602	0.999422	47.1984	6.4e-12	0.00883649	0.00128281	47.4496	5.6e-12	11_31259370_G_A	rs2761589
rs4783821	16	53834508	0	T	C	0.356044	0.994977	51.1754	8.4e-13	-0.00889809	0.00129145	47.4718	5.6e-12	16_53834508_T_C	rs11642015
rs10275488	7	17303778	0	C	T	0.879931	0.994726	43.4431	4.4e-11	-0.0131325	0.00190759	47.3943	5.8e-12	7_17303778_C_T	rs4410790
rs2210144	11	31253268	0	G	T	0.632641	0.999432	46.9418	7.3e-12	0.00882104	0.00128274	47.2896	6.1e-12	11_31253268_G_T	rs2761589
rs6460047	7	73042443	0	T	C	0.791987	0.995287	47.8035	4.7e-12	0.0105001	0.00152735	47.2616	6.2e-12	7_73042443_T_C	rs33951980
rs2666768	10	22201558	0	C	G	0.27546	0.993526	46.6299	8.6e-12	0.00953458	0.00138733	47.2328	6.3e-12	10_22201558_C_G	rs7072776
rs11031342	11	31309818	0	G	A	0.632603	0.996795	46.856	7.6e-12	0.00882852	0.00128444	47.2442	6.3e-12	11_31309818_G_A	rs2761589
rs2616799	11	31319044	0	T	C	0.367375	0.996611	46.8539	7.6e-12	-0.00882955	0.00128454	47.2477	6.3e-12	11_31319044_T_C	rs2761589
rs7805504	7	73042585	0	T	C	0.79186	0.993396	47.4161	5.7e-12	0.0104983	0.0015279	47.2115	6.4e-12	7_73042585_T_C	rs33951980
rs1802669	10	21827796	0	G	A	0.658334	0.996088	43.5246	4.2e-11	-0.00896354	0.00130485	47.1887	6.4e-12	10_21827796_G_A	rs7072776
rs12222329	11	31274340	0	T	C	0.632687	0.999473	46.8997	7.5e-12	0.00881441	0.00128279	47.2143	6.4e-12	11_31274340_T_C	rs2761589
rs2761594	11	31318244	0	A	G	0.367375	0.99673	46.8006	7.9e-12	-0.00882402	0.00128447	47.1938	6.4e-12	11_31318244_A_G	rs2761589
rs2150212	11	31255935	0	G	A	0.632694	0.999542	46.8395	7.7e-12	0.00880715	0.00128277	47.1381	6.6e-12	11_31255935_G_A	rs2761589
rs17137472	7	17296072	0	C	T	0.4992	0.996684	49.4251	2.1e-12	0.00849581	0.00123786	47.1049	6.7e-12	7_17296072_C_T	rs4410790
rs11031327	11	31254517	0	G	C	0.632663	0.998845	46.6231	8.6e-12	0.00880725	0.00128301	47.1218	6.7e-12	11_31254517_G_C	rs2761589
rs12788257	11	31255045	0	T	C	0.632655	0.999451	46.7897	7.9e-12	0.0088045	0.00128275	47.1117	6.7e-12	11_31255045_T_C	rs2761589
rs11031332	11	31278962	0	T	C	0.632319	0.999449	46.6685	8.4e-12	0.00880244	0.00128258	47.1019	6.7e-12	11_31278962_T_C	rs2761589
rs7116443	11	31283170	0	T	C	0.632342	0.999472	46.6634	8.4e-12	0.00880346	0.00128261	47.1103	6.7e-12	11_31283170_T_C	rs2761589
rs2774402	11	31312897	0	G	C	0.367438	0.996502	46.8539	7.6e-12	-0.00881786	0.00128452	47.124	6.7e-12	11_31312897_G_C	rs2761589
rs6482191	10	22045097	0	T	G	0.320239	0.996262	47.5649	5.3e-12	0.00909887	0.00132616	47.0744	6.8e-12	10_22045097_T_G	rs7072776
rs10835758	11	31294231	0	T	C	0.632326	0.999452	46.6368	8.5e-12	0.00880005	0.00128261	47.0743	6.8e-12	11_31294231_T_C	rs2761589
rs10835759	11	31301147	0	G	A	0.632727	0.999483	46.76	8e-12	0.00880144	0.00128287	47.07	6.8e-12	11_31301147_G_A	rs2761589
rs11031330	11	31275073	0	G	A	0.632509	0.99945	46.7188	8.2e-12	0.00879946	0.00128267	47.0635	6.9e-12	11_31275073_G_A	rs2761589
rs3802915	11	31284798	0	G	A	0.632748	0.99957	46.7548	8e-12	0.00879972	0.00128282	47.0547	6.9e-12	11_31284798_G_A	rs2761589
rs11031337	11	31301392	0	C	A	0.632737	0.999448	46.7519	8.1e-12	0.00880013	0.0012829	47.0535	6.9e-12	11_31301392_C_A	rs2761589
rs10835756	11	31267622	0	C	T	0.632691	0.999577	46.6898	8.3e-12	0.00879543	0.00128275	47.0143	7e-12	11_31267622_C_T	rs2761589
rs7113880	11	31279557	0	A	G	0.632103	0.999433	46.5081	9.1e-12	0.00879314	0.00128243	47.0137	7e-12	11_31279557_A_G	rs2761589
rs7121949	11	31288160	0	G	T	0.632724	0.999476	46.7585	8e-12	0.00879836	0.00128284	47.0393	7e-12	11_31288160_G_T	rs2761589
rs6482190	10	22037809	0	A	G	0.280552	0.990321	45.3565	1.6e-11	0.00947117	0.00138143	47.0057	7.1e-12	10_22037809_A_G	rs7072776
rs1929019	11	31267030	0	C	T	0.632692	0.999574	46.6751	8.4e-12	0.00879399	0.00128275	46.9988	7.1e-12	11_31267030_C_T	rs2761589
rs637174	19	49266936	0	G	A	0.660918	0.975126	34.7761	3.7e-09	-0.00904876	0.00131986	47.0028	7.1e-12	19_49266936_G_A	rs838133
rs4748768	10	22061997	0	A	G	0.29862	0.995101	49.1346	2.4e-12	0.00927462	0.0013536	46.9477	7.3e-12	10_22061997_A_G	rs7072776
rs281407	19	49233335	0	G	A	0.685417	0.993081	36.2462	1.7e-09	-0.00914383	0.00133459	46.942	7.3e-12	19_49233335_G_A	rs838133
rs1475558	11	31263428	0	T	C	0.632061	0.998847	46.4169	9.6e-12	0.00878271	0.00128266	46.8852	7.5e-12	11_31263428_T_C	rs2761589
rs12149182	16	53841177	0	A	G	0.359352	0.99646	50.8849	9.8e-13	-0.00880201	0.00128531	46.8975	7.5e-12	16_53841177_A_G	rs11642015
rs6650129	10	22280429	0	A	G	0.28816	0.994726	47.1272	6.7e-12	0.00936856	0.00136835	46.876	7.6e-12	10_22280429_A_G	rs7072776
rs12796587	11	31266443	0	T	C	0.632646	0.999528	46.5538	8.9e-12	0.0087828	0.00128276	46.8789	7.6e-12	11_31266443_T_C	rs2761589
rs8045332	16	53839422	0	T	C	0.359361	0.997036	50.8429	1e-12	-0.00879726	0.00128498	46.8708	7.6e-12	16_53839422_T_C	rs11642015
rs11031338	11	31302990	0	A	T	0.633207	0.998416	46.4126	9.6e-12	0.0087859	0.00128398	46.8225	7.8e-12	11_31302990_A_T	rs2761589
rs755170	12	78767274	0	T	A	0.629137	0.986403	48.3337	3.6e-12	0.00881772	0.00128862	46.8233	7.8e-12	12_78767274_T_A	rs12581220
rs2210143	11	31300793	0	T	G	0.67993	0.990672	48.9124	2.7e-12	0.00909794	0.00133014	46.7831	7.9e-12	11_31300793_T_G	rs2761589
rs6650130	10	22280664	0	A	T	0.288246	0.994692	46.9243	7.4e-12	0.00935401	0.00136823	46.7385	8.1e-12	10_22280664_A_T	rs7072776
rs7133393	12	78784772	0	G	A	0.650445	0.990038	47.1399	6.6e-12	0.00891106	0.00130347	46.7366	8.1e-12	12_78784772_G_A	rs12581220
rs2807985	10	22230474	0	C	A	0.275407	0.992796	46.5127	9.1e-12	0.00948078	0.00138824	46.6398	8.5e-12	10_22230474_C_A	rs7072776
rs13163314	5	148089587	0	C	T	0.768009	0.995107	47.6892	5e-12	0.0100176	0.00146711	46.6232	8.6e-12	5_148089587_C_T	rs13163314
rs2214210	7	17307374	0	G	A	0.498662	0.998153	48.6858	3e-12	0.00844764	0.00123712	46.6282	8.6e-12	7_17307374_G_A	rs4410790
rs13188076	5	148099993	0	G	T	0.768092	0.995885	47.3657	5.9e-12	0.010011	0.0014667	46.5882	8.8e-12	5_148099993_G_T	rs13163314
rs10508639	10	22089004	0	T	C	0.268553	0.996963	46.1941	1.1e-11	0.00953278	0.00139668	46.5847	8.8e-12	10_22089004_T_C	rs7072776
rs806774	10	22114427	0	A	T	0.284875	0.996164	43.3724	4.5e-11	0.00936414	0.00137197	46.585	8.8e-12	10_22114427_A_T	rs7072776
rs2941732	10	22231670	0	A	G	0.272959	0.995271	47.1342	6.6e-12	0.00947068	0.00138984	46.434	9.5e-12	10_22231670_A_G	rs7072776
rs7910002	10	22050570	0	G	C	0.30373	1	46.8745	7.6e-12	0.0091533	0.00134441	46.3545	9.9e-12	10_22050570_G_C	rs7072776
rs1957111	14	29781178	0	C	T	0.947639	0.988289	53.9477	2.1e-13	-0.018951	0.00278568	46.2809	1e-11	14_29781178_C_T	rs1957111
rs13023194	2	27967260	0	G	C	0.829139	0.989486	49.8614	1.7e-12	-0.0112068	0.0016486	46.2097	1.1e-11	2_27967260_G_C	rs1260326
rs2756191	11	31135882	0	A	T	0.630149	0.998874	43.4561	4.3e-11	0.00870932	0.00128123	46.2073	1.1e-11	11_31135882_A_T	rs2761589
rs176373	11	31136026	0	G	T	0.630162	0.998898	43.3258	4.6e-11	0.00869785	0.00128124	46.0851	1.1e-11	11_31136026_G_T	rs2761589
rs2150213	11	31244634	0	A	G	0.629181	0.998589	43.004	5.5e-11	0.00869818	0.00128069	46.1287	1.1e-11	11_31244634_A_G	rs2761589
rs838142	19	49252151	0	A	G	0.722862	0.997395	40.4793	2e-10	-0.0093985	0.00138469	46.0692	1.1e-11	19_49252151_A_G	rs838133
rs838140	19	49252698	0	C	T	0.745335	0.99695	42.3425	7.7e-11	-0.00966995	0.00142287	46.1869	1.1e-11	19_49252698_C_T	rs838133
rs208063	11	31159777	0	C	T	0.630058	0.999151	42.9351	5.7e-11	0.00867798	0.001281	45.8923	1.2e-11	11_31159777_C_T	rs2761589
rs11031323	11	31245413	0	T	G	0.629165	0.998467	42.8552	5.9e-11	0.00868738	0.00128075	46.0096	1.2e-11	11_31245413_T_G	rs2761589
rs11031324	11	31250299	0	T	C	0.629927	0.999061	42.9111	5.7e-11	0.00868654	0.00128087	45.9921	1.2e-11	11_31250299_T_C	rs2761589
rs7800944	7	73035857	0	T	C	0.71498	0.996319	45.4616	1.6e-11	0.00927849	0.00137085	45.8118	1.3e-11	7_73035857_T_C	rs33951980
rs61850044	10	21859585	0	A	G	0.692844	0.99742	42.3034	7.8e-11	-0.00907924	0.00134127	45.8211	1.3e-11	10_21859585_A_G	rs7072776
rs2666761	10	22255599	0	A	G	0.280169	0.99602	45.0043	2e-11	0.00934034	0.00137891	45.8834	1.3e-11	10_22255599_A_G	rs7072776
rs158144	11	31211795	0	A	C	0.629677	0.999742	42.7671	6.2e-11	0.00866203	0.00128039	45.767	1.3e-11	11_31211795_A_C	rs2761589
rs286649	11	31230468	0	C	T	0.630008	0.998728	42.6983	6.4e-11	0.00866876	0.00128115	45.784	1.3e-11	11_31230468_C_T	rs2761589
rs62387983	5	148098444	0	G	T	0.767287	0.99584	46.4077	9.6e-12	0.00989983	0.00146517	45.6544	1.4e-11	5_148098444_G_T	rs13163314
rs34166762	7	73018524	0	T	C	0.715493	0.99815	45.4485	1.6e-11	0.0092677	0.00137033	45.7398	1.4e-11	7_73018524_T_C	rs33951980
rs7798357	7	73032265	0	G	C	0.714995	0.996669	45.3512	1.6e-11	0.00926674	0.00137065	45.7092	1.4e-11	7_73032265_G_C	rs33951980
rs7785479	7	73032835	0	T	C	0.71498	0.996604	45.3241	1.7e-11	0.00926183	0.00137067	45.6593	1.4e-11	7_73032835_T_C	rs33951980
rs1243188	10	21908803	0	T	C	0.699606	0.996876	41.5328	1.2e-10	-0.0091177	0.00134997	45.6162	1.4e-11	10_21908803_T_C	rs7072776
rs208072	11	31141288	0	C	T	0.630052	0.998945	42.7354	6.3e-11	0.00866027	0.00128112	45.6964	1.4e-11	11_31141288_C_T	rs2761589
rs208067	11	31153578	0	C	T	0.630069	0.998922	42.7317	6.3e-11	0.00866038	0.00128115	45.6959	1.4e-11	11_31153578_C_T	rs2761589
rs208066	11	31156206	0	C	G	0.630014	0.998999	42.6684	6.5e-11	0.00865317	0.00128106	45.6257	1.4e-11	11_31156206_C_G	rs2761589
rs208103	11	31167400	0	A	G	0.630005	0.999194	42.7205	6.3e-11	0.0086562	0.00128094	45.6663	1.4e-11	11_31167400_A_G	rs2761589
rs208091	11	31190099	0	G	C	0.629988	0.999435	42.6894	6.4e-11	0.0086534	0.0012808	45.6466	1.4e-11	11_31190099_G_C	rs2761589
rs208088	11	31192686	0	T	C	0.629697	0.99939	42.6501	6.5e-11	0.00865146	0.00128065	45.6368	1.4e-11	11_31192686_T_C	rs2761589
rs158146	11	31210433	0	G	A	0.629691	0.999665	42.6199	6.6e-11	0.00864936	0.00128042	45.6311	1.4e-11	11_31210433_G_A	rs2761589
rs158140	11	31212971	0	T	C	0.629674	0.99964	42.687	6.4e-11	0.00865183	0.00128044	45.656	1.4e-11	11_31212971_T_C	rs2761589
rs158139	11	31216076	0	C	T	0.629956	0.999523	42.6604	6.5e-11	0.00865099	0.00128069	45.6293	1.4e-11	11_31216076_C_T	rs2761589
rs158136	11	31220712	0	C	T	0.629962	0.999676	42.6602	6.5e-11	0.00864955	0.0012806	45.6203	1.4e-11	11_31220712_C_T	rs2761589
rs366758	11	31222499	0	A	C	0.629679	0.999604	42.7459	6.2e-11	0.0086589	0.00128045	45.7299	1.4e-11	11_31222499_A_C	rs2761589
rs438578	11	31222579	0	C	T	0.62968	0.999605	42.658	6.5e-11	0.00865042	0.00128046	45.6399	1.4e-11	11_31222579_C_T	rs2761589
rs413067	11	31223497	0	T	C	0.62969	0.999511	42.6687	6.5e-11	0.00865104	0.00128052	45.6423	1.4e-11	11_31223497_T_C	rs2761589
rs286650	11	31230207	0	T	C	0.629809	0.998271	42.4328	7.3e-11	0.00865261	0.00128125	45.6066	1.4e-11	11_31230207_T_C	rs2761589
rs10252701	7	17280513	0	A	C	0.882084	0.989114	41.3667	1.3e-10	-0.0130068	0.00192648	45.5842	1.5e-11	7_17280513_A_C	rs4410790
rs2074768	7	73030103	0	A	C	0.714973	0.997054	45.2007	1.8e-11	0.00924941	0.00137037	45.5567	1.5e-11	7_73030103_A_C	rs33951980
rs2859622	10	22248424	0	C	T	0.281857	0.996044	43.7542	3.7e-11	0.00929246	0.00137657	45.5682	1.5e-11	10_22248424_C_T	rs7072776
rs208071	11	31144996	0	C	T	0.6301	0.998874	42.6551	6.5e-11	0.00864933	0.00128117	45.5775	1.5e-11	11_31144996_C_T	rs2761589
rs169623	11	31184157	0	T	C	0.62973	0.999276	42.585	6.8e-11	0.00864633	0.00128075	45.5761	1.5e-11	11_31184157_T_C	rs2761589
rs208090	11	31190992	0	T	C	0.629986	0.999417	42.582	6.8e-11	0.00864332	0.00128082	45.5391	1.5e-11	11_31190992_T_C	rs2761589
rs208083	11	31196880	0	G	A	0.629985	0.999427	42.5744	6.8e-11	0.00864453	0.00128079	45.5537	1.5e-11	11_31196880_G_A	rs2761589
rs58702363	11	31246397	0	C	A	0.62924	0.998681	42.3248	7.7e-11	0.00864755	0.00128067	45.5946	1.5e-11	11_31246397_C_A	rs2761589
rs4021	19	49253261	0	A	G	0.722576	1	40.0451	2.5e-10	-0.00933576	0.00138268	45.5887	1.5e-11	19_49253261_A_G	rs838133
rs2807984	10	22218941	0	A	G	0.271898	0.996944	45.5288	1.5e-11	0.00937042	0.00139124	45.3646	1.6e-11	10_22218941_A_G	rs7072776
rs7924036	10	65191645	0	G	T	0.49654	0.999646	48.4088	3.5e-12	0.00833585	0.00123695	45.4147	1.6e-11	10_65191645_G_T	rs7924036
rs12245149	10	65321147	0	C	A	0.513645	0.998881	47.0921	6.8e-12	-0.00833778	0.0012381	45.3513	1.6e-11	10_65321147_C_A	rs7924036
rs208093	11	31184400	0	T	C	0.629972	0.99921	42.4876	7.1e-11	0.00863609	0.00128094	45.4548	1.6e-11	11_31184400_T_C	rs2761589
rs2065208	11	31239457	0	C	T	0.63088	0.997172	43.3706	4.5e-11	0.00863926	0.00128225	45.3947	1.6e-11	11_31239457_C_T	rs2761589
rs117287096	19	41341413	0	G	A	0.977611	1	43.4698	4.3e-11	-0.0281939	0.00418133	45.4655	1.6e-11	19_41341413_G_A	rs117287096
rs10277582	7	17284989	0	C	T	0.881553	0.993984	40.9205	1.6e-10	-0.0129067	0.00191887	45.2419	1.7e-11	7_17284989_C_T	rs4410790
rs2793353	10	22145688	0	A	G	0.279121	0.995402	42.8991	5.8e-11	0.00929345	0.00138121	45.2725	1.7e-11	10_22145688_A_G	rs7072776
rs2807966	10	22248553	0	G	A	0.282535	0.995244	43.5124	4.2e-11	0.00925801	0.00137594	45.2726	1.7e-11	10_22248553_G_A	rs7072776
rs9919429	10	65313819	0	A	G	0.513664	0.999315	47.0887	6.8e-12	-0.00832577	0.00123786	45.2381	1.7e-11	10_65313819_A_G	rs7924036
rs6479905	10	65315231	0	A	G	0.513674	0.999286	47.0829	6.8e-12	-0.00832561	0.00123789	45.2346	1.7e-11	10_65315231_A_G	rs7924036
rs7898861	10	65319678	0	T	C	0.513697	0.999137	47.0714	6.8e-12	-0.00832776	0.00123796	45.2527	1.7e-11	10_65319678_T_C	rs7924036
rs441975	11	31233351	0	C	T	0.630898	0.998395	43.3088	4.7e-11	0.00863039	0.00128201	45.3185	1.7e-11	11_31233351_C_T	rs2761589
rs10860383	12	78799932	0	T	A	0.585771	0.991874	50.045	1.5e-12	0.00847531	0.00126	45.2446	1.7e-11	12_78799932_T_A	rs12581220
rs7311712	12	78807411	0	C	T	0.590563	0.992156	50.2191	1.4e-12	0.00849564	0.0012621	45.3111	1.7e-11	12_78807411_C_T	rs12581220
rs11012737	10	21849769	0	G	A	0.693628	0.998239	41.2383	1.3e-10	-0.00902187	0.00134172	45.2137	1.8e-11	10_21849769_G_A	rs7072776
rs1243194	10	21980514	0	G	A	0.711193	0.995559	41.4393	1.2e-10	-0.00918689	0.00136628	45.2124	1.8e-11	10_21980514_G_A	rs7072776
rs792454	10	22191381	0	A	C	0.271808	0.997194	45.4626	1.6e-11	0.00935421	0.00139118	45.2113	1.8e-11	10_22191381_A_C	rs7072776
rs7085018	10	65286667	0	T	C	0.522263	0.998647	48.9726	2.6e-12	0.00832692	0.00123886	45.178	1.8e-11	10_65286667_T_C	rs7924036
rs2163188	10	65314711	0	G	C	0.513672	0.99934	47.0585	6.9e-12	-0.00832236	0.00123785	45.2017	1.8e-11	10_65314711_G_C	rs7924036
rs35814008	7	73055461	0	A	C	0.866571	0.986842	42.7408	6.2e-11	0.0122758	0.00182806	45.094	1.9e-11	7_73055461_A_C	rs33951980
rs7905967	10	21873295	0	G	T	0.695523	0.99649	42.1406	8.5e-11	-0.00903003	0.00134515	45.065	1.9e-11	10_21873295_G_T	rs7072776
rs4486511	10	65264266	0	C	T	0.526619	0.999849	49.0771	2.5e-12	0.00831234	0.00123832	45.0593	1.9e-11	10_65264266_C_T	rs7924036
rs7082470	10	65277026	0	G	A	0.528122	0.998325	48.6582	3e-12	0.00832151	0.00123947	45.0743	1.9e-11	10_65277026_G_A	rs7924036
rs10761785	10	65318766	0	G	T	0.487879	0.996172	46.8105	7.8e-12	0.00832028	0.00123969	45.0454	1.9e-11	10_65318766_G_T	rs7924036
rs11031320	11	31242545	0	C	T	0.630684	0.9985	43.0577	5.3e-11	0.008606	0.00128177	45.0797	1.9e-11	11_31242545_C_T	rs2761589
rs10835757	11	31281902	0	G	A	0.632573	1	44.6621	2.3e-11	0.00860365	0.00128214	45.0291	1.9e-11	11_31281902_G_A	rs2761589
rs2941733	10	22241656	0	T	C	0.28063	0.996036	43.2715	4.8e-11	0.00924229	0.00137838	44.9596	2e-11	10_22241656_T_C	rs7072776
rs10761782	10	65287064	0	A	G	0.522375	0.998293	48.7896	2.8e-12	0.00830567	0.00123913	44.9277	2e-11	10_65287064_A_G	rs7924036
rs10777939	12	78768977	0	T	C	0.583851	0.990546	49.8074	1.7e-12	0.00844513	0.00125965	44.9484	2e-11	12_78768977_T_C	rs12581220
rs148788997	16	30323168	0	G	C	0.87565	0.954213	47.5914	5.2e-12	0.0128322	0.00191455	44.9228	2e-11	16_30323168_G_C	rs4788415
rs2807979	10	22213104	0	T	C	0.271639	0.997091	45.267	1.7e-11	0.00931835	0.00139153	44.8429	2.1e-11	10_22213104_T_C	rs7072776
rs2666759	10	22254978	0	A	T	0.273123	0.996397	45.1557	1.8e-11	0.00930838	0.00138924	44.8943	2.1e-11	10_22254978_A_T	rs7072776
rs10761778	10	65273782	0	A	G	0.526534	0.999934	48.859	2.8e-12	0.0082961	0.00123827	44.8868	2.1e-11	10_65273782_A_G	rs7924036
rs7075901	10	65280994	0	C	A	0.528142	0.998227	48.4374	3.4e-12	0.00830143	0.00123954	44.8524	2.1e-11	10_65280994_C_A	rs7924036
rs286653	11	31227824	0	C	T	0.631065	0.999242	42.9477	5.6e-11	0.00858198	0.0012816	44.8406	2.1e-11	11_31227824_C_T	rs2761589
rs7132557	12	78804472	0	T	C	0.580349	0.991878	49.3763	2.1e-12	0.00842793	0.00125794	44.8871	2.1e-11	12_78804472_T_C	rs12581220
rs35106244	19	49203829	0	C	T	0.537633	0.947013	26.5196	2.6e-07	0.00853378	0.00127399	44.8695	2.1e-11	19_49203829_C_T	rs838133
rs12783517	10	21878407	0	C	T	0.696828	0.99744	41.5296	1.2e-10	-0.00900918	0.00134643	44.7715	2.2e-11	10_21878407_C_T	rs7072776
rs1243187	10	21907016	0	T	C	0.689648	0.997555	40.4032	2.1e-10	-0.00894903	0.00133731	44.7804	2.2e-11	10_21907016_T_C	rs7072776
rs1243182	10	21916728	0	C	T	0.688642	0.994471	40.1511	2.4e-10	-0.00895096	0.00133813	44.7448	2.2e-11	10_21916728_C_T	rs7072776
rs2666750	10	22219556	0	T	C	0.306907	0.991726	47.3128	6.1e-12	0.00899485	0.0013443	44.7708	2.2e-11	10_22219556_T_C	rs7072776
rs10509189	10	65264126	0	T	C	0.526538	0.999879	48.7574	2.9e-12	0.00828441	0.00123828	44.7597	2.2e-11	10_65264126_T_C	rs7924036
rs9971352	10	65265108	0	A	T	0.526547	0.999903	48.762	2.9e-12	0.00828407	0.00123828	44.756	2.2e-11	10_65265108_A_T	rs7924036
rs208110	11	31204271	0	T	C	0.630163	0.999382	41.8121	1e-10	0.00857663	0.001281	44.8264	2.2e-11	11_31204271_T_C	rs2761589
rs62466318	7	73042085	0	C	T	0.797009	0.993191	41.8651	9.8e-11	0.0103063	0.00154117	44.7202	2.3e-11	7_73042085_C_T	rs33951980
rs7098100	10	21834536	0	G	A	0.660396	1	40.7301	1.7e-10	-0.00871985	0.00130464	44.6722	2.3e-11	10_21834536_G_A	rs7072776
rs10761779	10	65274927	0	A	G	0.526466	1	48.6184	3.1e-12	0.00827761	0.00123842	44.676	2.3e-11	10_65274927_A_G	rs7924036
rs7920036	10	65293860	0	T	C	0.521744	0.998564	48.4801	3.3e-12	0.00827958	0.00123877	44.6718	2.3e-11	10_65293860_T_C	rs7924036
rs7920058	10	65293924	0	T	G	0.521737	0.998443	48.4647	3.4e-12	0.00827814	0.00123877	44.6563	2.3e-11	10_65293924_T_G	rs7924036
rs2393984	10	65314971	0	A	G	0.514168	0.999398	46.5884	8.8e-12	-0.00827809	0.00123774	44.7305	2.3e-11	10_65314971_A_G	rs7924036
rs7919685	10	65315800	0	G	T	0.514169	0.999407	46.5942	8.7e-12	-0.00827875	0.00123774	44.7374	2.3e-11	10_65315800_G_T	rs7924036
rs10828250	10	21847178	0	C	G	0.690872	0.99431	41.0575	1.5e-10	-0.00896022	0.00134114	44.6365	2.4e-11	10_21847178_C_G	rs7072776
rs1270799	10	21907423	0	T	G	0.697127	0.996128	40.6023	1.9e-10	-0.00899732	0.00134754	44.5801	2.4e-11	10_21907423_T_G	rs7072776
rs7070761	10	65317056	0	A	T	0.514182	0.999326	46.4704	9.3e-12	-0.00826625	0.00123779	44.5989	2.4e-11	10_65317056_A_T	rs7924036
rs2666782	10	22212556	0	A	G	0.272297	0.996186	44.6451	2.4e-11	0.0092831	0.00139114	44.5289	2.5e-11	10_22212556_A_G	rs7072776
rs2393977	10	65247609	0	A	C	0.526575	0.999529	48.6964	3e-12	0.00826805	0.00123858	44.5616	2.5e-11	10_65247609_A_C	rs7924036
rs10740129	10	65250808	0	G	A	0.526628	0.999567	48.5435	3.2e-12	0.00826389	0.00123851	44.5216	2.5e-11	10_65250808_G_A	rs7924036
rs12247907	10	65317045	0	G	C	0.514173	0.999375	46.4401	9.4e-12	-0.00826303	0.00123776	44.5666	2.5e-11	10_65317045_G_C	rs7924036
rs1999250	11	31287455	0	C	T	0.637421	0.987062	44.7019	2.3e-11	0.00864323	0.00129482	44.5588	2.5e-11	11_31287455_C_T	rs2761589
rs35587371	10	21878144	0	T	A	0.696821	0.997221	41.1775	1.4e-10	-0.00898229	0.00134661	44.493	2.6e-11	10_21878144_T_A	rs7072776
rs1243193	10	21981257	0	T	G	0.698758	0.996123	40.6438	1.8e-10	-0.0089986	0.00134922	44.4822	2.6e-11	10_21981257_T_G	rs7072776
rs11816415	10	22083051	0	T	C	0.300319	0.996209	46.3868	9.7e-12	0.00900559	0.00135043	44.4713	2.6e-11	10_22083051_T_C	rs7072776
rs2807987	10	22239952	0	G	A	0.274753	0.995492	44.4018	2.7e-11	0.00924539	0.00138712	44.4243	2.6e-11	10_22239952_G_A	rs7072776
rs7915779	10	65244244	0	G	C	0.526587	0.999539	48.6285	3.1e-12	0.00826188	0.00123859	44.4938	2.6e-11	10_65244244_G_C	rs7924036
rs7310563	12	78803728	0	A	G	0.580352	0.991311	48.8633	2.7e-12	0.00839078	0.0012582	44.4743	2.6e-11	12_78803728_A_G	rs12581220
rs10860385	12	78805547	0	T	G	0.580726	0.991743	48.9933	2.6e-12	0.0083915	0.00125812	44.4875	2.6e-11	12_78805547_T_G	rs12581220
rs7786376	7	73042614	0	A	G	0.7229	0.992647	44.2891	2.8e-11	0.00923372	0.00138549	44.4168	2.7e-11	7_73042614_A_G	rs33951980
rs7777102	7	73058017	0	A	G	0.866623	0.985288	42.2326	8.1e-11	0.0121909	0.00182977	44.3889	2.7e-11	7_73058017_A_G	rs33951980
rs2666764	10	22150711	0	A	G	0.271821	0.996875	43.913	3.4e-11	0.00926861	0.00139115	44.3898	2.7e-11	10_22150711_A_G	rs7072776
rs806772	10	22156961	0	C	T	0.299251	0.995246	46.0359	1.2e-11	0.0090122	0.00135239	44.4079	2.7e-11	10_22156961_C_T	rs7072776
rs11109585	12	78779785	0	A	C	0.581393	0.99366	49.1974	2.3e-12	0.0083723	0.00125714	44.3528	2.7e-11	12_78779785_A_C	rs12581220
rs2807986	10	22233793	0	A	T	0.272901	0.996824	44.4802	2.6e-11	0.00924963	0.0013895	44.3129	2.8e-11	10_22233793_A_T	rs7072776
rs2666754	10	22243072	0	G	A	0.282605	0.994447	43.2422	4.8e-11	0.00915998	0.00137597	44.317	2.8e-11	10_22243072_G_A	rs7072776
rs10761716	10	64882300	0	C	G	0.55971	0.994368	48.3944	3.5e-12	0.00831367	0.00124939	44.278	2.8e-11	10_64882300_C_G	rs7924036
rs7896783	10	65162153	0	G	A	0.526899	0.999095	48.8432	2.8e-12	0.00824793	0.00123886	44.3246	2.8e-11	10_65162153_G_A	rs7924036
rs10822168	10	65165184	0	G	A	0.526654	0.999151	48.5404	3.2e-12	0.00824666	0.0012388	44.3154	2.8e-11	10_65165184_G_A	rs7924036
rs10761784	10	65308750	0	A	T	0.520562	0.999148	48.0662	4.1e-12	0.00824133	0.00123851	44.2789	2.8e-11	10_65308750_A_T	rs7924036
rs10740134	10	65315433	0	T	C	0.520407	1	47.9403	4.4e-12	0.00824388	0.0012384	44.3141	2.8e-11	10_65315433_T_C	rs7924036
rs2504696	6	51287661	0	C	T	0.815412	0.991677	51.174	8.5e-13	0.0106413	0.00159971	44.2492	2.9e-11	6_51287661_C_T	rs2504671
rs11012750	10	21894028	0	A	G	0.691796	0.997674	40.2143	2.3e-10	-0.00891658	0.00134002	44.2768	2.9e-11	10_21894028_A_G	rs7072776
rs10761758	10	65172747	0	A	T	0.52656	0.999869	48.3567	3.6e-12	0.00823894	0.00123844	44.2579	2.9e-11	10_65172747_A_T	rs7924036
rs6484509	11	31598874	0	T	C	0.449709	0.9998	44.9598	2e-11	-0.00826143	0.00124202	44.244	2.9e-11	11_31598874_T_C	rs2761589
rs784257	18	53397199	0	T	C	0.187588	0.987731	40.4804	2e-10	-0.0105962	0.00159303	44.2435	2.9e-11	18_53397199_T_C	rs784257
rs1243179	10	21912579	0	A	G	0.692214	0.996889	39.8495	2.7e-10	-0.00891071	0.00134108	44.1484	3e-11	10_21912579_A_G	rs7072776
rs7909269	10	65177766	0	G	A	0.526554	0.999836	48.3104	3.6e-12	0.00822974	0.00123846	44.158	3e-11	10_65177766_G_A	rs7924036
rs7077580	10	65180885	0	G	A	0.526548	0.999582	48.3234	3.6e-12	0.00823051	0.00123862	44.1544	3e-11	10_65180885_G_A	rs7924036
rs10761772	10	65235829	0	G	T	0.526578	0.999544	48.3033	3.7e-12	0.00823025	0.00123858	44.1551	3e-11	10_65235829_G_T	rs7924036
rs10835788	11	31593663	0	G	T	0.449764	0.999688	44.7942	2.2e-11	-0.00825255	0.00124207	44.1452	3e-11	11_31593663_G_T	rs2761589
rs7125290	11	31595437	0	A	T	0.449718	0.999794	44.894	2.1e-11	-0.00825663	0.00124202	44.1925	3e-11	11_31595437_A_T	rs2761589
rs28399462	19	41350615	0	G	A	0.977347	0.985267	42.3818	7.5e-11	-0.0278277	0.00418601	44.193	3e-11	19_41350615_G_A	rs117287096
rs36042399	5	148068936	0	C	T	0.77257	0.992179	45.5656	1.5e-11	0.00982787	0.00147972	44.1125	3.1e-11	5_148068936_C_T	rs13163314
rs10761750	10	65128619	0	G	A	0.526391	0.99991	48.3422	3.6e-12	0.00822182	0.00123833	44.0821	3.1e-11	10_65128619_G_A	rs7924036
rs7923609	10	65133822	0	A	G	0.526346	1	48.3325	3.6e-12	0.00822595	0.00123837	44.1237	3.1e-11	10_65133822_A_G	rs7924036
rs7085621	10	65208926	0	T	C	0.526477	0.999832	48.2142	3.8e-12	0.00822313	0.00123836	44.094	3.1e-11	10_65208926_T_C	rs7924036
rs10740125	10	65209609	0	T	C	0.526478	0.999834	48.2191	3.8e-12	0.00822329	0.00123836	44.0957	3.1e-11	10_65209609_T_C	rs7924036
rs10761771	10	65230164	0	T	C	0.526536	0.999458	48.2771	3.7e-12	0.00822703	0.00123863	44.1166	3.1e-11	10_65230164_T_C	rs7924036
rs10733792	10	65232539	0	A	G	0.526578	0.999532	48.2799	3.7e-12	0.00822891	0.00123858	44.1405	3.1e-11	10_65232539_A_G	rs7924036
rs7909960	10	65239177	0	T	A	0.526598	0.999488	48.2541	3.7e-12	0.00822436	0.00123861	44.0896	3.1e-11	10_65239177_T_A	rs7924036
rs2807968	10	22252089	0	C	T	0.281603	0.995483	43.1687	5e-11	0.00914243	0.00137713	44.0733	3.2e-11	10_22252089_C_T	rs7072776
rs10835781	11	31565012	0	A	G	0.449725	0.999836	44.76	2.2e-11	-0.00824205	0.00124197	44.04	3.2e-11	11_31565012_A_G	rs2761589
rs6968170	7	73020676	0	G	A	0.717063	0.998495	43.5279	4.2e-11	0.0091051	0.00137242	44.0147	3.3e-11	7_73020676_G_A	rs33951980
rs10822164	10	65127258	0	G	A	0.526391	0.999919	48.2241	3.8e-12	0.00821181	0.00123832	43.9758	3.3e-11	10_65127258_G_A	rs7924036
rs10761751	10	65154885	0	A	G	0.526652	0.999444	48.5599	3.2e-12	0.00821569	0.00123859	43.9977	3.3e-11	10_65154885_A_G	rs7924036
rs7912893	10	65162000	0	T	A	0.526754	0.999619	48.5361	3.2e-12	0.00821212	0.00123854	43.9631	3.3e-11	10_65162000_T_A	rs7924036
rs7923544	10	65182256	0	T	G	0.526492	0.999781	48.1406	4e-12	0.00821338	0.00123839	43.9877	3.3e-11	10_65182256_T_G	rs7924036
rs3956912	10	65205881	0	C	T	0.526488	0.99984	48.1362	4e-12	0.00821493	0.00123835	44.0066	3.3e-11	10_65205881_C_T	rs7924036
rs518161	11	31538155	0	T	G	0.449697	0.999737	44.6252	2.4e-11	-0.00823524	0.001242	43.9653	3.3e-11	11_31538155_T_G	rs2761589
rs9749209	19	49264547	0	A	G	0.360013	0.953734	31.5198	2e-08	-0.00874076	0.00131748	44.0157	3.3e-11	19_49264547_A_G	rs838133
rs1728918	2	27635463	0	A	G	0.278276	0.979179	45.3665	1.6e-11	0.00920829	0.00138955	43.9144	3.4e-11	2_27635463_A_G	rs1260326
rs2026092	10	21911657	0	G	A	0.700272	0.996986	40.4638	2e-10	-0.00895471	0.00135066	43.9551	3.4e-11	10_21911657_G_A	rs7072776
rs7076310	10	65135672	0	C	A	0.526347	0.99992	48.1324	4e-12	0.00820893	0.00123832	43.9447	3.4e-11	10_65135672_C_A	rs7924036
rs4310508	10	65138573	0	A	G	0.52634	0.999915	48.0845	4.1e-12	0.00820614	0.00123831	43.9155	3.4e-11	10_65138573_A_G	rs7924036
rs7095571	10	65150959	0	T	G	0.526648	0.999444	48.4897	3.3e-12	0.00820993	0.00123859	43.9363	3.4e-11	10_65150959_T_G	rs7924036
rs10761752	10	65160321	0	T	C	0.526541	0.999207	48.5239	3.3e-12	0.00820915	0.00123868	43.9213	3.4e-11	10_65160321_T_C	rs7924036
rs10761762	10	65184717	0	T	C	0.526491	0.999795	48.0985	4.1e-12	0.00820936	0.00123838	43.9453	3.4e-11	10_65184717_T_C	rs7924036
rs10761763	10	65188318	0	T	C	0.526486	0.999793	48.0859	4.1e-12	0.00820879	0.00123838	43.9391	3.4e-11	10_65188318_T_C	rs7924036
rs509628	11	31535355	0	G	A	0.449728	0.999598	44.5812	2.4e-11	-0.00823165	0.00124205	43.9232	3.4e-11	11_31535355_G_A	rs2761589
rs7109043	11	31561850	0	G	A	0.449781	0.999714	44.6386	2.4e-11	-0.00823447	0.00124203	43.9546	3.4e-11	11_31561850_G_A	rs2761589
rs10860377	12	78794242	0	T	G	0.590639	0.992648	48.5114	3.3e-12	0.00836305	0.00126195	43.9183	3.4e-11	12_78794242_T_G	rs12581220
rs35732917	7	73013269	0	T	C	0.715613	0.997522	44.0319	3.2e-11	0.00907742	0.00137048	43.8709	3.5e-11	7_73013269_T_C	rs33951980
rs7916868	10	64988931	0	A	T	0.496305	0.998098	46.4943	9.2e-12	0.00819811	0.0012376	43.8802	3.5e-11	10_64988931_A_T	rs7924036
rs12355784	10	65121565	0	C	A	0.526345	0.999922	48.0032	4.3e-12	0.0082036	0.00123829	43.8901	3.5e-11	10_65121565_C_A	rs7924036
rs7910927	10	65138910	0	T	G	0.526586	0.999769	48.3753	3.5e-12	0.00820075	0.00123843	43.8496	3.5e-11	10_65138910_T_G	rs7924036
rs10761766	10	65190327	0	G	A	0.526462	0.999714	48.0388	4.2e-12	0.00820282	0.00123842	43.8723	3.5e-11	10_65190327_G_A	rs7924036
rs3740331	10	65192288	0	G	A	0.526489	0.999785	48.0117	4.2e-12	0.00820198	0.00123839	43.8658	3.5e-11	10_65192288_G_A	rs7924036
rs28791933	6	53982630	0	G	A	0.358737	0.996741	49.045	2.5e-12	0.00853717	0.00128994	43.8014	3.6e-11	6_53982630_G_A	rs816366
rs2666757	10	22245299	0	C	A	0.282288	0.995714	42.0577	8.9e-11	0.00910689	0.00137592	43.8083	3.6e-11	10_22245299_C_A	rs7072776
rs10509186	10	65207018	0	C	T	0.52646	0.999825	47.9042	4.5e-12	0.00819775	0.00123834	43.8236	3.6e-11	10_65207018_C_T	rs7924036
rs7897379	10	65301725	0	T	C	0.521461	0.998959	47.5556	5.3e-12	0.0081979	0.00123865	43.8035	3.6e-11	10_65301725_T_C	rs7924036
rs498250	11	31534584	0	A	G	0.449734	0.999261	44.4905	2.6e-11	-0.00822243	0.00124226	43.8099	3.6e-11	11_31534584_A_G	rs2761589
rs502794	11	31547227	0	G	T	0.449874	1	44.4625	2.6e-11	-0.00821904	0.00124181	43.8057	3.6e-11	11_31547227_G_T	rs2761589
rs7140993	14	27107166	0	G	A	0.738394	0.991361	40.1108	2.4e-10	0.00933716	0.00141075	43.8056	3.6e-11	14_27107166_G_A	rs7140993
rs61010704	7	73019975	0	A	G	0.717023	0.99861	43.2796	4.7e-11	0.00908137	0.00137243	43.7845	3.7e-11	7_73019975_A_G	rs33951980
rs3999089	10	65203808	0	A	G	0.527337	0.99906	48.0878	4.1e-12	0.0081945	0.00123881	43.7559	3.7e-11	10_65203808_A_G	rs7924036
rs10740126	10	65210935	0	A	G	0.526511	0.999792	47.8592	4.6e-12	0.00819069	0.00123838	43.7452	3.7e-11	10_65210935_A_G	rs7924036
rs1950400	14	27105035	0	C	G	0.738386	0.991388	40.0236	2.5e-10	0.00933021	0.00141071	43.743	3.7e-11	14_27105035_C_G	rs7140993
rs11706708	3	35699022	0	C	T	0.787733	0.994143	37.9309	7.3e-10	-0.0100163	0.00151496	43.713	3.8e-11	3_35699022_C_T	rs1513481
rs1243189	10	21935248	0	A	G	0.682453	0.997151	39.0668	4.1e-10	-0.00879216	0.00132947	43.7358	3.8e-11	10_21935248_A_G	rs7072776
rs2487512	10	22137880	0	A	C	0.301924	0.997092	45.4913	1.5e-11	0.0089115	0.001348	43.704	3.8e-11	10_22137880_A_C	rs7072776
rs2666772	10	22233087	0	C	T	0.273242	0.996661	43.5695	4.1e-11	0.00918166	0.00138911	43.6888	3.8e-11	10_22233087_C_T	rs7072776
rs6479896	10	65126832	0	T	C	0.526397	1	47.8949	4.5e-12	0.00818686	0.00123831	43.7095	3.8e-11	10_65126832_T_C	rs7924036
rs7092784	10	65214749	0	C	T	0.5265	0.999793	47.8678	4.6e-12	0.00818996	0.00123838	43.7377	3.8e-11	10_65214749_C_T	rs7924036
rs16921914	11	31210771	0	G	A	0.714717	1	42.3574	7.6e-11	0.00904267	0.0013679	43.7006	3.8e-11	11_31210771_G_A	rs2761589
rs2666776	10	22241988	0	C	T	0.281197	0.995018	42.2898	7.9e-11	0.00910473	0.001378	43.6551	3.9e-11	10_22241988_C_T	rs7072776
rs1223097	11	31504557	0	A	G	0.449437	0.998551	44.3636	2.7e-11	-0.00820969	0.00124272	43.6421	3.9e-11	11_31504557_A_G	rs2761589
rs6975495	7	73034030	0	A	G	0.716082	0.996476	42.983	5.5e-11	0.00906561	0.00137236	43.6375	4e-11	7_73034030_A_G	rs33951980
rs2807983	10	22218773	0	T	C	0.306476	0.993145	45.8253	1.3e-11	0.00887592	0.00134426	43.5972	4e-11	10_22218773_T_C	rs7072776
rs10822163	10	65124098	0	C	G	0.526585	0.999594	47.8347	4.6e-12	0.0081796	0.00123848	43.6202	4e-11	10_65124098_C_G	rs7924036
rs10740131	10	65271488	0	A	T	0.526346	0.995731	47.386	5.8e-12	0.00819168	0.0012405	43.6066	4e-11	10_65271488_A_T	rs7924036
rs2393986	10	65320006	0	A	T	0.521156	0.999417	47.2458	6.3e-12	0.00817922	0.00123848	43.616	4e-11	10_65320006_A_T	rs7924036
rs67707190	11	31210500	0	A	G	0.713834	0.997577	42.134	8.5e-11	0.00903501	0.00136837	43.5966	4e-11	11_31210500_A_G	rs2761589
rs1223090	11	31499705	0	G	A	0.449555	0.998609	44.366	2.7e-11	-0.00820857	0.0012427	43.6318	4e-11	11_31499705_G_A	rs2761589
rs1223098	11	31506907	0	T	G	0.449579	0.998751	44.2821	2.8e-11	-0.00820441	0.0012426	43.5948	4e-11	11_31506907_T_G	rs2761589
rs2224267	14	29753035	0	G	A	0.94789	0.997941	50.223	1.4e-12	-0.0183533	0.00277978	43.592	4e-11	14_29753035_G_A	rs1957111
rs837629	19	49268852	0	C	G	0.656867	0.979905	31.6976	1.8e-08	-0.00866827	0.00131255	43.6146	4e-11	19_49268852_C_G	rs838133
rs792457	10	22163935	0	A	G	0.295278	0.993624	45.2981	1.7e-11	0.00897261	0.00135925	43.575	4.1e-11	10_22163935_A_G	rs7072776
rs1430556	12	78804859	0	G	A	0.610797	0.987817	44.4334	2.6e-11	0.00841995	0.00127555	43.5733	4.1e-11	12_78804859_G_A	rs12581220
rs7154726	14	27118376	0	G	A	0.268488	0.992353	39.5766	3.2e-10	-0.0092354	0.00139928	43.5613	4.1e-11	14_27118376_G_A	rs7140993
rs35493868	7	73039406	0	C	G	0.797586	0.995358	40.7284	1.7e-10	0.0101673	0.00154098	43.5329	4.2e-11	7_73039406_C_G	rs33951980
rs2666763	10	22101608	0	G	A	0.318954	0.994997	43.7424	3.7e-11	0.00876454	0.00132892	43.497	4.2e-11	10_22101608_G_A	rs7072776
rs143200968	19	41338847	0	G	C	0.978337	0.997136	41.2938	1.3e-10	-0.0280567	0.00425375	43.504	4.2e-11	19_41338847_G_C	rs117287096
rs2784191	6	51475835	0	T	C	0.402596	0.995968	41.7909	1e-10	-0.00833228	0.00126348	43.49	4.3e-11	6_51475835_T_C	rs2504671
rs1223106	11	31528354	0	T	A	0.449638	0.998819	44.2238	2.9e-11	-0.00819355	0.00124254	43.4834	4.3e-11	11_31528354_T_A	rs2761589
rs7334078	13	99120484	0	T	C	0.717026	0.993985	46.7344	8.1e-12	0.0090649	0.00137467	43.484	4.3e-11	13_99120484_T_C	rs7334078
rs11627577	14	27105561	0	C	T	0.268655	0.993251	39.4042	3.4e-10	-0.00922073	0.00139832	43.4827	4.3e-11	14_27105561_C_T	rs7140993
rs11159938	14	27106986	0	G	C	0.268648	0.993406	39.393	3.5e-10	-0.00922005	0.00139833	43.4757	4.3e-11	14_27106986_G_C	rs7140993
rs8010856	14	27108798	0	G	A	0.268646	0.993181	39.4194	3.4e-10	-0.00922228	0.00139838	43.4934	4.3e-11	14_27108798_G_A	rs7140993
rs7808877	7	73027450	0	C	G	0.716316	0.997783	42.9047	5.7e-11	0.00903898	0.00137194	43.408	4.4e-11	7_73027450_C_G	rs33951980
rs55747707	7	73037366	0	G	A	0.797617	0.995534	40.6204	1.8e-10	0.0101536	0.00154093	43.4179	4.4e-11	7_73037366_G_A	rs33951980
rs4748761	10	21989245	0	A	G	0.297037	0.995704	39.1915	3.8e-10	0.00892967	0.00135513	43.4217	4.4e-11	10_21989245_A_G	rs7072776
rs2457954	10	22138400	0	A	T	0.31079	0.996009	45.8418	1.3e-11	0.00881935	0.00133821	43.4337	4.4e-11	10_22138400_A_T	rs7072776
rs1010727	14	27117177	0	G	A	0.268449	0.993095	39.4435	3.4e-10	-0.00921689	0.00139886	43.4133	4.4e-11	14_27117177_G_A	rs7140993
rs7718324	5	148044266	0	T	A	0.773504	0.993603	44.4519	2.6e-11	0.0097575	0.00148121	43.3957	4.5e-11	5_148044266_T_A	rs13163314
rs2253990	6	51299842	0	G	A	0.815862	0.992306	49.9572	1.6e-12	0.0105438	0.00160074	43.3863	4.5e-11	6_51299842_G_A	rs2504671
rs17145750	7	73026378	0	C	T	0.839131	1	38.0491	6.9e-10	0.0110698	0.00168155	43.337	4.6e-11	7_73026378_C_T	rs33951980
rs4748779	10	22288132	0	C	T	0.272143	0.996168	43.8695	3.5e-11	0.00916074	0.00139139	43.3473	4.6e-11	10_22288132_C_T	rs7072776
rs2332816	14	27104848	0	G	T	0.268641	0.993264	39.2788	3.7e-10	-0.00920493	0.00139835	43.3318	4.6e-11	14_27104848_G_T	rs7140993
rs2332818	14	27112432	0	T	C	0.268445	0.993403	39.382	3.5e-10	-0.00920935	0.00139876	43.3479	4.6e-11	14_27112432_T_C	rs7140993
rs4297616	14	27112879	0	C	T	0.268443	0.993194	39.3846	3.5e-10	-0.0092084	0.00139877	43.3388	4.6e-11	14_27112879_C_T	rs7140993
rs9387963	6	98423208	0	G	A	0.442994	0.999409	45.8176	1.3e-11	-0.00819859	0.00124605	43.2922	4.7e-11	6_98423208_G_A	rs9387963
rs10835747	11	31170095	0	G	A	0.714197	0.99775	41.9168	9.5e-11	0.00900501	0.00136862	43.2913	4.7e-11	11_31170095_G_A	rs2761589
rs11623268	14	27105469	0	A	T	0.268471	0.992633	39.2005	3.8e-10	-0.00920524	0.00139911	43.2879	4.7e-11	14_27105469_A_T	rs7140993
rs784256	18	53398626	0	G	A	0.188389	0.988144	39.5867	3.1e-10	-0.0104643	0.00159054	43.2839	4.7e-11	18_53398626_G_A	rs784257
rs2807982	10	22215860	0	T	A	0.309131	0.991191	45.3037	1.7e-11	0.00882277	0.00134162	43.2462	4.8e-11	10_22215860_T_A	rs7072776
rs2998361	10	22245923	0	T	C	0.274865	0.99685	42.8648	5.9e-11	0.00911844	0.00138625	43.2673	4.8e-11	10_22245923_T_C	rs7072776
rs12571634	10	22287722	0	T	C	0.272037	0.99701	43.8094	3.6e-11	0.00914759	0.00139107	43.2427	4.8e-11	10_22287722_T_C	rs7072776
rs10822145	10	64934548	0	C	T	0.52418	0.998077	46.0308	1.2e-11	0.00814903	0.00123907	43.2535	4.8e-11	10_64934548_C_T	rs7924036
rs4379723	10	64963449	0	T	C	0.526896	0.999785	47.0693	6.9e-12	0.00814325	0.00123834	43.2426	4.8e-11	10_64963449_T_C	rs7924036
rs669789	19	49269559	0	T	C	0.656111	0.982201	31.6636	1.8e-08	-0.00861692	0.00131043	43.2389	4.8e-11	19_49269559_T_C	rs838133
rs9387955	6	98419195	0	A	G	0.443013	0.999338	45.7457	1.3e-11	-0.00819094	0.00124606	43.2105	4.9e-11	6_98419195_A_G	rs9387963
rs10761727	10	64995493	0	C	T	0.526951	0.999773	47.0122	7.1e-12	0.00814028	0.00123834	43.2117	4.9e-11	10_64995493_C_T	rs7924036
rs13246490	7	72992350	0	C	T	0.876766	0.999392	40.6827	1.8e-10	0.0123382	0.00187811	43.1582	5e-11	7_72992350_C_T	rs33951980
rs2998360	10	22246114	0	T	C	0.274408	0.996641	43.0442	5.4e-11	0.00911575	0.00138713	43.187	5e-11	10_22246114_T_C	rs7072776
rs4399232	10	64999490	0	C	T	0.52696	0.999731	46.9828	7.2e-12	0.00813847	0.00123834	43.1922	5e-11	10_64999490_C_T	rs7924036
rs10822161	10	65118203	0	G	A	0.526672	0.999581	47.1918	6.4e-12	0.00813774	0.00123851	43.1726	5e-11	10_65118203_G_A	rs7924036
rs2893919	10	65134778	0	G	A	0.526525	0.999572	47.3297	6e-12	0.00814	0.00123856	43.193	5e-11	10_65134778_G_A	rs7924036
rs12194414	6	51312010	0	C	T	0.816006	0.992438	49.6543	1.8e-12	0.0105151	0.00160114	43.1287	5.1e-11	6_51312010_C_T	rs2504671
rs6482189	10	21889138	0	G	A	0.681829	0.997606	42.0201	9e-11	-0.00872214	0.00132822	43.1228	5.1e-11	10_21889138_G_A	rs7072776
rs2666773	10	22123768	0	A	T	0.288477	0.994383	39.7413	2.9e-10	0.00898638	0.00136811	43.1448	5.1e-11	10_22123768_A_T	rs7072776
rs10761723	10	64955581	0	C	T	0.52699	0.999661	46.9434	7.3e-12	0.00813318	0.00123845	43.1287	5.1e-11	10_64955581_C_T	rs7924036
rs7895472	10	64961412	0	G	A	0.526936	0.999758	46.9128	7.4e-12	0.00813178	0.00123836	43.1198	5.1e-11	10_64961412_G_A	rs7924036
rs7895610	10	64961659	0	C	T	0.526942	0.999779	46.9381	7.3e-12	0.00813362	0.00123835	43.1401	5.1e-11	10_64961659_C_T	rs7924036
rs10822149	10	64987412	0	G	A	0.526944	0.999758	46.9491	7.3e-12	0.00813516	0.00123835	43.1564	5.1e-11	10_64987412_G_A	rs7924036
rs10995477	10	65010672	0	T	C	0.526974	0.999532	46.9623	7.2e-12	0.00813297	0.00123853	43.1209	5.1e-11	10_65010672_T_C	rs7924036
rs147593816	14	29755359	0	A	C	0.947716	0.992448	49.6911	1.8e-12	-0.018235	0.00277642	43.1362	5.1e-11	14_29755359_A_C	rs1957111
rs7625602	3	35682674	0	C	A	0.789935	0.993518	36.5615	1.5e-09	-0.00998314	0.00152066	43.0995	5.2e-11	3_35682674_C_A	rs1513481
rs2579997	6	51476037	0	C	T	0.394836	0.995874	40.4846	2e-10	-0.00832112	0.00126769	43.0862	5.2e-11	6_51476037_C_T	rs2504671
rs4412207	6	98410756	0	G	A	0.442937	0.996684	45.656	1.4e-11	-0.00818914	0.00124741	43.0981	5.2e-11	6_98410756_G_A	rs9387963
rs10761729	10	64995604	0	G	C	0.526953	0.999746	46.9023	7.5e-12	0.00813084	0.00123834	43.111	5.2e-11	10_64995604_G_C	rs7924036
rs2393966	10	65134814	0	T	G	0.52659	0.999349	47.2113	6.4e-12	0.00812962	0.00123871	43.0723	5.3e-11	10_65134814_T_G	rs7924036
rs1232186	11	31622534	0	C	T	0.550281	0.998315	44.0415	3.2e-11	0.00815391	0.00124275	43.0491	5.3e-11	11_31622534_C_T	rs2761589
rs139279213	14	29808270	0	A	T	0.950092	0.974229	50.0466	1.5e-12	-0.0188303	0.00287005	43.0464	5.3e-11	14_29808270_A_T	rs1957111
rs9381965	6	51306453	0	G	A	0.815797	0.992906	49.4593	2e-12	0.0104974	0.00160004	43.0424	5.4e-11	6_51306453_G_A	rs2504671
rs7765605	6	98409668	0	T	C	0.442894	0.996503	45.5932	1.5e-11	-0.00818219	0.00124754	43.0163	5.4e-11	6_98409668_T_C	rs9387963
rs546308	19	49223570	0	G	A	0.391656	0.996262	27.1009	1.9e-07	0.00831441	0.00126749	43.03	5.4e-11	19_49223570_G_A	rs838133
rs2252343	10	22111229	0	A	T	0.302974	0.996363	45.3501	1.6e-11	0.00882992	0.00134693	42.9761	5.5e-11	10_22111229_A_T	rs7072776
rs4405189	10	65013935	0	A	G	0.527024	0.999343	46.7495	8.1e-12	0.00812302	0.00123864	43.0076	5.5e-11	10_65013935_A_G	rs7924036
rs10281571	7	17285867	0	C	G	0.861512	0.9788	37.6372	8.5e-10	-0.0118572	0.00180916	42.9549	5.6e-11	7_17285867_C_G	rs4410790
rs13232120	7	72983310	0	A	T	0.876836	0.99997	40.4259	2e-10	0.0123109	0.00187804	42.9702	5.6e-11	7_72983310_A_T	rs33951980
rs10822156	10	65080727	0	T	C	0.527054	0.999881	46.8744	7.6e-12	0.00811471	0.0012383	42.9433	5.6e-11	10_65080727_T_C	rs7924036
rs56303656	14	27107921	0	T	A	0.739423	0.99187	39.5964	3.1e-10	0.00925495	0.0014122	42.9493	5.6e-11	14_27107921_T_A	rs7140993
rs12050219	14	27111436	0	A	G	0.26854	0.99322	38.863	4.5e-10	-0.00916517	0.00139863	42.9412	5.6e-11	14_27111436_A_G	rs7140993
rs28399459	19	41350787	0	C	G	0.978234	0.995349	40.9248	1.6e-10	-0.0278694	0.00425235	42.9534	5.6e-11	19_41350787_C_G	rs117287096
rs11531420	5	148069705	0	T	C	0.771847	0.99139	44.2358	2.9e-11	0.0096812	0.0014779	42.9109	5.7e-11	5_148069705_T_C	rs13163314
rs1465406	5	148116306	0	A	C	0.769005	0.991594	43.9533	3.4e-11	0.00964627	0.00147214	42.9359	5.7e-11	5_148116306_A_C	rs13163314
rs6938973	6	98421721	0	T	C	0.398777	0.998867	43.6598	3.9e-11	-0.00828141	0.00126403	42.9234	5.7e-11	6_98421721_T_C	rs9387963
rs1935	10	64927823	0	C	G	0.526695	1	46.5616	8.9e-12	0.00811646	0.00123874	42.9312	5.7e-11	10_64927823_C_G	rs7924036
rs17111488	14	27107260	0	A	G	0.739423	0.991875	39.5838	3.1e-10	0.00925369	0.00141219	42.938	5.7e-11	14_27107260_A_G	rs7140993
rs2793352	10	22150445	0	G	A	0.310614	0.996297	43.6476	3.9e-11	0.0087633	0.00133804	42.8942	5.8e-11	10_22150445_G_A	rs7072776
rs2666781	10	22205676	0	C	A	0.313875	0.992893	44.2309	2.9e-11	0.00874626	0.00133564	42.8809	5.8e-11	10_22205676_C_A	rs7072776
rs4400684	10	65012687	0	A	G	0.52708	0.999603	46.7614	8e-12	0.00811103	0.00123848	42.892	5.8e-11	10_65012687_A_G	rs7924036
rs9387952	6	98415577	0	T	G	0.443185	0.997479	45.3571	1.6e-11	-0.00816184	0.00124694	42.8437	5.9e-11	6_98415577_T_G	rs9387963
rs10828258	10	21929734	0	A	G	0.680807	0.996567	38.139	6.6e-10	-0.00869299	0.00132772	42.8671	5.9e-11	10_21929734_A_G	rs7072776
rs2666753	10	22184104	0	A	G	0.310854	0.993514	44.3432	2.8e-11	0.00876954	0.0013395	42.8617	5.9e-11	10_22184104_A_G	rs7072776
rs4146689	10	22276819	0	A	C	0.269087	0.997553	43.5314	4.2e-11	0.00913782	0.00139569	42.8655	5.9e-11	10_22276819_A_C	rs7072776
rs11109504	12	78755911	0	G	A	0.575854	0.983919	47.7584	4.8e-12	0.00825709	0.00126146	42.8458	5.9e-11	12_78755911_G_A	rs12581220
rs145580088	19	41342842	0	A	G	0.978302	0.997357	40.6423	1.8e-10	-0.027827	0.00425008	42.8685	5.9e-11	19_41342842_A_G	rs117287096
rs17145738	7	72982874	0	C	T	0.877657	1	40.4179	2.1e-10	0.0123261	0.00188337	42.8328	6e-11	7_72982874_C_T	rs33951980
rs4454603	10	65012750	0	C	T	0.52714	0.999508	46.6691	8.4e-12	0.00810529	0.00123855	42.8262	6e-11	10_65012750_C_T	rs7924036
rs11604176	11	31293663	0	C	T	0.713902	0.997048	41.3247	1.3e-10	0.00895375	0.00136839	42.8146	6e-11	11_31293663_C_T	rs2761589
rs35173225	7	73001021	0	C	T	0.876818	0.999601	40.418	2.1e-10	0.0122867	0.00187822	42.7931	6.1e-11	7_73001021_C_T	rs33951980
rs4678789	3	35695512	0	T	C	0.789692	0.994136	36.3502	1.6e-09	-0.00993523	0.00151939	42.7579	6.2e-11	3_35695512_T_C	rs1513481
rs10456148	6	51344239	0	C	T	0.824056	0.994997	49.6955	1.8e-12	0.0106417	0.00162738	42.7607	6.2e-11	6_51344239_C_T	rs2504671
rs10828248	10	21824619	0	A	G	0.656446	0.999722	38.7174	4.9e-10	-0.00850747	0.00130121	42.7469	6.2e-11	10_21824619_A_G	rs7072776
rs12784277	10	21857150	0	C	G	0.70177	0.997313	38.922	4.4e-10	-0.00884303	0.00135247	42.7512	6.2e-11	10_21857150_C_G	rs7072776
rs2183271	10	21957229	0	T	C	0.639672	1	39.4981	3.3e-10	-0.00843208	0.00128965	42.7491	6.2e-11	10_21957229_T_C	rs7072776
rs792458	10	22133793	0	T	G	0.318271	0.994884	42.744	6.2e-11	0.00869471	0.00132971	42.7559	6.2e-11	10_22133793_T_G	rs7072776
rs6479877	10	64878118	0	C	G	0.557616	0.988939	46.8553	7.6e-12	0.00818891	0.00125235	42.7564	6.2e-11	10_64878118_C_G	rs7924036
rs10822158	10	65094383	0	A	G	0.527023	0.999875	46.6677	8.4e-12	0.00809722	0.00123831	42.7574	6.2e-11	10_65094383_A_G	rs7924036
rs10740115	10	65094990	0	G	A	0.527023	0.999873	46.6602	8.4e-12	0.00809653	0.00123831	42.7504	6.2e-11	10_65094990_G_A	rs7924036
rs6788752	3	35687209	0	T	A	0.78956	0.994372	36.1793	1.8e-09	-0.00992867	0.00151896	42.726	6.3e-11	3_35687209_T_A	rs1513481
rs3898645	6	51321303	0	C	T	0.821375	0.993587	48.9489	2.6e-12	0.0105801	0.00161888	42.7121	6.3e-11	6_51321303_C_T	rs2504671
rs10822160	10	65112796	0	T	G	0.527083	0.999566	46.6294	8.6e-12	0.00809576	0.00123852	42.7279	6.3e-11	10_65112796_T_G	rs7924036
rs56150758	14	27105474	0	A	T	0.739598	0.991259	39.3638	3.5e-10	0.00923676	0.00141298	42.7333	6.3e-11	14_27105474_A_T	rs7140993
rs28399448	19	41352936	0	C	T	0.97815	0.992918	40.857	1.6e-10	-0.0277737	0.00424931	42.72	6.3e-11	19_41352936_C_T	rs117287096
rs34041533	3	35686326	0	A	G	0.78955	0.994415	36.1642	1.8e-09	-0.00992577	0.00151892	42.7028	6.4e-11	3_35686326_A_G	rs1513481
rs4595427	10	65012944	0	A	C	0.527152	0.999315	46.4975	9.2e-12	0.00809383	0.00123872	42.6935	6.4e-11	10_65012944_A_C	rs7924036
rs10822153	10	65056813	0	C	A	0.527164	0.999632	46.5919	8.7e-12	0.00809259	0.00123849	42.6964	6.4e-11	10_65056813_C_A	rs7924036
rs7070296	10	65070438	0	T	A	0.527045	0.99985	46.5596	8.9e-12	0.00809213	0.0012383	42.7044	6.4e-11	10_65070438_T_A	rs7924036
rs11129660	3	35695961	0	C	T	0.789937	0.99463	36.2335	1.8e-09	-0.00992874	0.00151993	42.6718	6.5e-11	3_35695961_C_T	rs1513481
rs10761742	10	65085048	0	A	G	0.527027	0.999885	46.5159	9.1e-12	0.00808698	0.00123828	42.6516	6.5e-11	10_65085048_A_G	rs7924036
rs3092	3	35684169	0	T	C	0.789552	0.994319	36.0777	1.9e-09	-0.00991437	0.00151894	42.6036	6.7e-11	3_35684169_T_C	rs1513481
rs6799641	3	35686732	0	A	T	0.789554	0.994331	36.0897	1.9e-09	-0.00991593	0.00151895	42.6168	6.7e-11	3_35686732_A_T	rs1513481
rs11129661	3	35696026	0	C	T	0.789973	0.994577	36.1412	1.8e-09	-0.00992267	0.00152004	42.6136	6.7e-11	3_35696026_C_T	rs1513481
rs6905544	6	98411631	0	A	G	0.398577	0.996549	43.3774	4.5e-11	-0.00826096	0.00126544	42.6163	6.7e-11	6_98411631_A_G	rs9387963
rs10828249	10	21824727	0	G	A	0.656355	1	38.5596	5.3e-10	-0.00849357	0.00130108	42.6162	6.7e-11	10_21824727_G_A	rs7072776
rs10740116	10	65094992	0	T	C	0.527009	0.999915	46.4818	9.2e-12	0.00808311	0.00123828	42.6106	6.7e-11	10_65094992_T_C	rs7924036
rs72549444	19	41351843	0	G	A	0.977787	0.995379	40.8975	1.6e-10	-0.0274656	0.00420813	42.5992	6.7e-11	19_41351843_G_A	rs117287096
rs3796183	3	35684594	0	T	C	0.789973	0.994626	35.9635	2e-09	-0.00991971	0.00152013	42.5832	6.8e-11	3_35684594_T_C	rs1513481
rs7902343	10	65005399	0	C	T	0.527942	0.9977	46.6944	8.3e-12	0.00808452	0.00123945	42.5454	6.9e-11	10_65005399_C_T	rs7924036
rs117683060	19	41394102	0	A	G	0.978305	0.998532	40.179	2.3e-10	-0.0277358	0.00425148	42.5598	6.9e-11	19_41394102_A_G	rs117287096
rs2784184	6	51465417	0	A	C	0.436776	0.998484	39.9406	2.6e-10	-0.00813829	0.00124809	42.5178	7e-11	6_51465417_A_C	rs2504671
rs2771009	6	51465832	0	T	C	0.436918	0.999054	39.9724	2.6e-10	-0.00813718	0.00124778	42.5279	7e-11	6_51465832_T_C	rs2504671
rs2579982	6	51466221	0	C	G	0.436933	0.998966	39.9621	2.6e-10	-0.00813629	0.00124783	42.5153	7e-11	6_51466221_C_G	rs2504671
rs1243184	10	21931937	0	T	C	0.680647	0.996639	37.8322	7.7e-10	-0.00865723	0.00132745	42.5323	7e-11	10_21931937_T_C	rs7072776
rs2771008	6	51465519	0	T	C	0.436927	0.999092	39.9296	2.6e-10	-0.00813288	0.00124775	42.4847	7.1e-11	6_51465519_T_C	rs2504671
rs6482188	10	21876939	0	C	A	0.704509	0.99641	39.4942	3.3e-10	-0.00884439	0.00135672	42.4967	7.1e-11	10_21876939_C_A	rs7072776
rs11012753	10	21896820	0	C	T	0.715469	0.995684	38.4656	5.6e-10	-0.00894839	0.00137277	42.4911	7.1e-11	10_21896820_C_T	rs7072776
rs2807980	10	22149410	0	A	G	0.302764	0.997006	44.1506	3e-11	0.0087809	0.00134692	42.5007	7.1e-11	10_22149410_A_G	rs7072776
rs7904395	10	22164160	0	T	C	0.297064	0.996689	43.7692	3.7e-11	0.00883074	0.00135465	42.4952	7.1e-11	10_22164160_T_C	rs7072776
rs2784239	6	51461219	0	T	G	0.436877	0.999749	39.9116	2.7e-10	-0.0081281	0.0012474	42.4589	7.2e-11	6_51461219_T_G	rs2504671
rs2579985	6	51463395	0	T	G	0.436904	0.999535	39.8986	2.7e-10	-0.0081282	0.00124752	42.4513	7.2e-11	6_51463395_T_G	rs2504671
rs2784181	6	51464070	0	C	T	0.436809	0.99909	39.8997	2.7e-10	-0.00813048	0.00124778	42.4579	7.2e-11	6_51464070_C_T	rs2504671
rs7922587	10	65069614	0	T	C	0.527021	0.99984	46.3378	1e-11	0.00806955	0.00123828	42.4681	7.2e-11	10_65069614_T_C	rs7924036
rs2021807	11	30806998	0	T	C	0.669369	0.97347	46.2976	1e-11	0.00865748	0.00132848	42.4694	7.2e-11	11_30806998_T_C	rs2021807
rs7113110	11	30807171	0	C	T	0.669375	0.973428	46.2909	1e-11	0.0086571	0.00132851	42.4632	7.2e-11	11_30807171_C_T	rs2021807
rs1223121	11	31464938	0	G	A	0.448853	0.998436	43.2547	4.8e-11	-0.00809601	0.00124281	42.4358	7.3e-11	11_31464938_G_A	rs2761589
rs838136	19	49256388	0	T	C	0.717296	0.972774	37.0122	1.2e-09	-0.00907323	0.00139266	42.4458	7.3e-11	19_49256388_T_C	rs838133
rs12496573	3	35691151	0	G	A	0.789886	0.994322	35.9686	2e-09	-0.00989971	0.0015201	42.413	7.4e-11	3_35691151_G_A	rs1513481
rs6930919	6	51468044	0	A	G	0.43706	0.998158	39.8774	2.7e-10	-0.00812845	0.00124801	42.4212	7.4e-11	6_51468044_A_G	rs2504671
rs118094146	14	29732783	0	A	C	0.947916	0.997385	48.5775	3.2e-12	-0.0181163	0.00278146	42.4223	7.4e-11	14_29732783_A_C	rs1957111
rs1465405	5	148116202	0	T	G	0.751843	1	43.5316	4.2e-11	0.00931826	0.00143118	42.3919	7.5e-11	5_148116202_T_G	rs13163314
rs6900820	6	98405151	0	T	A	0.44265	0.996087	45.0516	1.9e-11	-0.00812167	0.00124761	42.3775	7.5e-11	6_98405151_T_A	rs9387963
rs6917247	6	98405337	0	C	G	0.442651	0.996095	45.0483	1.9e-11	-0.00812119	0.0012476	42.3729	7.5e-11	6_98405337_C_G	rs9387963
rs2784231	6	51459621	0	C	T	0.43689	0.999819	39.828	2.8e-10	-0.00811892	0.00124735	42.3659	7.6e-11	6_51459621_C_T	rs2504671
rs2579987	6	51462408	0	T	A	0.436895	0.999729	39.8247	2.8e-10	-0.0081186	0.00124741	42.3592	7.6e-11	6_51462408_T_A	rs2504671
rs7772622	6	98404346	0	T	C	0.442662	0.996024	45.036	1.9e-11	-0.00812107	0.00124764	42.3692	7.6e-11	6_98404346_T_C	rs9387963
rs6917037	6	98405214	0	C	G	0.442657	0.996067	45.0369	1.9e-11	-0.00812065	0.00124762	42.366	7.6e-11	6_98405214_C_G	rs9387963
rs1232184	11	31630811	0	C	T	0.549065	0.997802	43.3885	4.5e-11	0.00809013	0.00124304	42.3589	7.6e-11	11_31630811_C_T	rs2761589
rs629504	19	49223633	0	C	G	0.39103	0.996521	26.5163	2.6e-07	0.00825166	0.0012677	42.3694	7.6e-11	19_49223633_C_G	rs838133
rs2149575	6	51457375	0	G	A	0.43689	0.999833	39.7865	2.8e-10	-0.00811496	0.00124735	42.3251	7.7e-11	6_51457375_G_A	rs2504671
rs9375023	6	98403903	0	T	C	0.442666	0.996011	45.0117	2e-11	-0.00811791	0.00124763	42.3369	7.7e-11	6_98403903_T_C	rs9387963
rs9482139	6	98406850	0	T	C	0.442843	0.995686	45.009	2e-11	-0.00811772	0.0012478	42.3232	7.7e-11	6_98406850_T_C	rs9387963
rs1243192	10	21983960	0	C	A	0.702161	0.995775	38.1229	6.6e-10	-0.00880962	0.00135387	42.3409	7.7e-11	10_21983960_C_A	rs7072776
rs7772327	6	98404174	0	T	C	0.442649	0.996055	44.9777	2e-11	-0.00811496	0.00124762	42.3067	7.8e-11	6_98404174_T_C	rs9387963
rs11592565	10	21884471	0	A	G	0.700158	0.99843	38.3766	5.8e-10	-0.00877796	0.00135003	42.2764	7.9e-11	10_21884471_A_G	rs7072776
rs2397054	6	51462382	0	G	A	0.436107	0.998289	39.527	3.2e-10	-0.00811574	0.00124836	42.2645	8e-11	6_51462382_G_A	rs2504671
rs10828256	10	21883988	0	T	A	0.700324	0.998329	38.3896	5.8e-10	-0.0087776	0.0013503	42.2563	8e-11	10_21883988_T_A	rs7072776
rs10948634	6	51448806	0	A	T	0.563116	0.999962	39.676	3e-10	0.00810579	0.00124727	42.2345	8.1e-11	6_51448806_A_T	rs2504671
rs2784182	6	51464129	0	G	T	0.43684	0.999059	39.6781	3e-10	-0.00810809	0.00124778	42.2244	8.1e-11	6_51464129_G_T	rs2504671
rs1541134	6	51473316	0	A	G	0.437275	0.997257	39.3967	3.5e-10	-0.00811256	0.0012485	42.2221	8.1e-11	6_51473316_A_G	rs2504671
rs4313006	6	98406939	0	G	A	0.442823	0.995745	44.9312	2e-11	-0.00810961	0.0012478	42.2388	8.1e-11	6_98406939_G_A	rs9387963
rs2793341	10	22107047	0	T	C	0.303959	0.995569	44.9732	2e-11	0.0087482	0.00134613	42.234	8.1e-11	10_22107047_T_C	rs7072776
rs74040467	14	29739542	0	G	A	0.947656	0.993896	48.4727	3.3e-12	-0.0180273	0.00277435	42.2217	8.1e-11	14_29739542_G_A	rs1957111
rs74040468	14	29742589	0	C	T	0.947657	0.994117	48.4965	3.3e-12	-0.0180275	0.00277415	42.229	8.1e-11	14_29742589_C_T	rs1957111
rs6925776	6	51467383	0	G	A	0.436945	0.998386	39.6117	3.1e-10	-0.00810803	0.00124799	42.2091	8.2e-11	6_51467383_G_A	rs2504671
rs6650999	6	98401847	0	T	C	0.44258	0.995784	44.9222	2.1e-11	-0.00810764	0.00124783	42.2162	8.2e-11	6_98401847_T_C	rs9387963
rs3817588	2	27731212	0	T	C	0.804546	0.980232	43.1056	5.2e-11	0.0101973	0.00156986	42.1936	8.3e-11	2_27731212_T_C	rs1260326
rs9395695	6	51449442	0	G	A	0.563129	1	39.6509	3e-10	0.00810127	0.00124744	42.1759	8.3e-11	6_51449442_G_A	rs2504671
rs2579983	6	51465438	0	T	G	0.43657	0.998349	39.6325	3.1e-10	-0.00810772	0.00124833	42.1829	8.3e-11	6_51465438_T_G	rs2504671
rs1108202	6	51469221	0	T	C	0.437365	0.997951	39.3936	3.5e-10	-0.00810597	0.00124797	42.1894	8.3e-11	6_51469221_T_C	rs2504671
rs7753937	6	98396351	0	A	G	0.442648	0.995725	44.8594	2.1e-11	-0.00810394	0.00124783	42.1774	8.3e-11	6_98396351_A_G	rs9387963
rs9490147	6	98397820	0	C	T	0.442653	0.995805	44.8595	2.1e-11	-0.00810336	0.00124779	42.1741	8.3e-11	6_98397820_C_T	rs9387963
rs4644071	6	98399604	0	T	C	0.443173	0.993751	45.0371	1.9e-11	-0.00811257	0.00124891	42.1943	8.3e-11	6_98399604_T_C	rs9387963
rs6569189	6	98401483	0	A	C	0.4426	0.995932	44.8957	2.1e-11	-0.008103	0.00124773	42.1748	8.3e-11	6_98401483_A_C	rs9387963
rs10828252	10	21856475	0	G	T	0.702424	0.997364	38.4616	5.6e-10	-0.00879021	0.00135343	42.1822	8.3e-11	10_21856475_G_T	rs7072776
rs1951287	14	29777123	0	C	T	0.94709	0.990301	49.3105	2.2e-12	-0.0179724	0.00276725	42.1806	8.3e-11	14_29777123_C_T	rs1957111
rs6651004	6	98401808	0	T	C	0.442638	0.995814	44.8795	2.1e-11	-0.00810237	0.00124778	42.1645	8.4e-11	6_98401808_T_C	rs9387963
rs6569192	6	98402211	0	G	T	0.442577	0.995755	44.8719	2.1e-11	-0.00810273	0.00124785	42.1634	8.4e-11	6_98402211_G_T	rs9387963
rs11012725	10	21793824	0	C	T	0.650903	0.991863	38.4789	5.5e-10	-0.00844519	0.00130079	42.1508	8.4e-11	10_21793824_C_T	rs7072776
rs112972262	14	29766299	0	G	A	0.947072	0.99565	48.8645	2.7e-12	-0.0179256	0.00276093	42.1537	8.4e-11	14_29766299_G_A	rs1957111
rs9490143	6	98396176	0	G	A	0.442652	0.995777	44.8173	2.2e-11	-0.00809998	0.00124782	42.1368	8.5e-11	6_98396176_G_A	rs9387963
rs6569187	6	98400486	0	T	C	0.443326	0.994122	44.9199	2.1e-11	-0.00810666	0.00124865	42.1506	8.5e-11	6_98400486_T_C	rs9387963
rs9395694	6	51449126	0	C	T	0.563295	0.999302	39.5695	3.2e-10	0.00809652	0.00124776	42.1053	8.6e-11	6_51449126_C_T	rs2504671
rs2149577	6	51463917	0	T	C	0.436889	0.998842	39.5308	3.2e-10	-0.00809664	0.00124774	42.1077	8.6e-11	6_51463917_T_C	rs2504671
rs2149578	6	51464042	0	C	T	0.436888	0.998824	39.5395	3.2e-10	-0.00809752	0.00124775	42.1163	8.6e-11	6_51464042_C_T	rs2504671
rs11154010	6	98398945	0	A	G	0.443423	0.994192	44.8595	2.1e-11	-0.00810293	0.00124857	42.1171	8.6e-11	6_98398945_A_G	rs9387963
rs141949574	19	41392043	0	G	A	0.978298	0.998339	39.7797	2.8e-10	-0.0275905	0.00425158	42.1131	8.6e-11	19_41392043_G_A	rs117287096
rs1335909	6	51463215	0	G	A	0.436983	0.999295	39.5241	3.2e-10	-0.00809375	0.00124748	42.0955	8.7e-11	6_51463215_G_A	rs2504671
rs13225450	7	72976123	0	C	T	0.876944	0.999548	39.4657	3.3e-10	0.0121911	0.00187917	42.0875	8.7e-11	7_72976123_C_T	rs33951980
rs911268	11	30809653	0	T	C	0.669427	0.978755	46.0168	1.2e-11	0.00859723	0.00132502	42.0988	8.7e-11	11_30809653_T_C	rs2021807
rs80151817	14	29775175	0	G	A	0.947111	0.993894	48.8283	2.8e-12	-0.0179317	0.00276369	42.0984	8.7e-11	14_29775175_G_A	rs1957111
rs2579986	6	51463154	0	A	G	0.437502	0.998221	39.4687	3.3e-10	-0.00809511	0.0012482	42.0608	8.8e-11	6_51463154_A_G	rs2504671
rs4464802	6	98399612	0	T	A	0.443248	0.993846	44.8924	2.1e-11	-0.0080997	0.00124883	42.0662	8.8e-11	6_98399612_T_A	rs9387963
rs111269058	7	72975702	0	C	T	0.876943	0.999581	39.4543	3.4e-10	0.0121887	0.00187914	42.0725	8.8e-11	7_72975702_C_T	rs33951980
rs7089656	10	22284140	0	T	G	0.271301	1	42.2978	7.8e-11	0.00902171	0.00139092	42.0699	8.8e-11	10_22284140_T_G	rs7072776
rs80187352	14	29765887	0	T	C	0.94706	0.995232	48.791	2.8e-12	-0.01791	0.0027611	42.0753	8.8e-11	14_29765887_T_C	rs1957111
rs55921593	19	41353897	0	G	T	0.978351	0.999036	40.2134	2.3e-10	-0.0276063	0.00425659	42.0621	8.8e-11	19_41353897_G_T	rs117287096
rs4364959	10	22285371	0	C	T	0.276323	0.996048	41.9161	9.5e-11	0.00897969	0.00138488	42.0436	8.9e-11	10_22285371_C_T	rs7072776
rs1961821	6	51452051	0	C	A	0.562912	0.99941	39.4991	3.3e-10	0.00808628	0.00124726	42.0326	9e-11	6_51452051_C_A	rs2504671
rs9296657	6	51461440	0	C	T	0.436971	0.999505	39.4795	3.3e-10	-0.00808726	0.00124735	42.0368	9e-11	6_51461440_C_T	rs2504671
rs4548017	6	98399521	0	A	G	0.399069	0.994159	43.0884	5.2e-11	-0.00820969	0.00126644	42.023	9e-11	6_98399521_A_G	rs9387963
rs10828247	10	21822856	0	A	G	0.656862	0.997455	37.6303	8.6e-10	-0.0084471	0.00130299	42.0276	9e-11	10_21822856_A_G	rs7072776
rs792453	10	22154208	0	T	C	0.287004	0.994911	43.1598	5e-11	0.00887345	0.00136893	42.0168	9e-11	10_22154208_T_C	rs7072776
rs117787553	14	29710453	0	A	G	0.946664	0.985168	48.3837	3.5e-12	-0.0179288	0.00276564	42.0252	9e-11	14_29710453_A_G	rs1957111
rs2495848	6	51451278	0	T	G	0.562915	0.999463	39.478	3.3e-10	0.00808408	0.00124725	42.0103	9.1e-11	6_51451278_T_G	rs2504671
rs9381990	6	51458797	0	T	C	0.43697	0.999539	39.4502	3.4e-10	-0.00808431	0.00124733	42.0074	9.1e-11	6_51458797_T_C	rs2504671
rs2397053	6	51462112	0	G	A	0.436974	0.999468	39.455	3.4e-10	-0.00808464	0.00124737	42.0081	9.1e-11	6_51462112_G_A	rs2504671
rs4344637	14	29747997	0	T	G	0.0528991	0.996727	48.7092	3e-12	0.0178879	0.00276011	42.0016	9.1e-11	14_29747997_T_G	rs1957111
rs1956241	14	29748294	0	C	T	0.052899	0.996717	48.7112	3e-12	0.0178882	0.00276011	42.003	9.1e-11	14_29748294_C_T	rs1957111
rs1210127	14	29749374	0	T	A	0.0528946	0.996648	48.706	3e-12	0.0178913	0.00276033	42.0112	9.1e-11	14_29749374_T_A	rs1957111
rs74040482	14	29774219	0	A	G	0.947094	0.99459	48.7201	3e-12	-0.017902	0.00276243	41.9974	9.1e-11	14_29774219_A_G	rs1957111
rs2152460	6	51456814	0	T	C	0.436971	0.999554	39.4216	3.4e-10	-0.0080815	0.00124732	41.9787	9.2e-11	6_51456814_T_C	rs2504671
rs1932444	6	51456890	0	T	C	0.436971	0.999554	39.4217	3.4e-10	-0.0080815	0.00124732	41.9787	9.2e-11	6_51456890_T_C	rs2504671
rs1335910	6	51463150	0	A	G	0.437441	0.998345	39.4222	3.4e-10	-0.00808707	0.00124814	41.9816	9.2e-11	6_51463150_A_G	rs2504671
rs7761851	6	98402438	0	T	C	0.442523	0.995703	44.6742	2.3e-11	-0.0080862	0.00124789	41.989	9.2e-11	6_98402438_T_C	rs9387963
rs10761756	10	65172328	0	C	T	0.52683	1	45.9848	1.2e-11	0.00802932	0.00123932	41.9752	9.2e-11	10_65172328_C_T	rs7924036
rs74040481	14	29774030	0	G	A	0.947093	0.994705	48.6993	3e-12	-0.0178978	0.00276228	41.9822	9.2e-11	14_29774030_G_A	rs1957111
rs9474027	6	51455410	0	G	C	0.43697	0.999566	39.4096	3.4e-10	-0.00808017	0.00124731	41.9652	9.3e-11	6_51455410_G_C	rs2504671
rs74040476	14	29770853	0	C	T	0.947099	0.994948	48.6795	3e-12	-0.0178936	0.00276223	41.9641	9.3e-11	14_29770853_C_T	rs1957111
rs11154009	6	98398832	0	C	T	0.443442	0.994263	44.7341	2.3e-11	-0.00808465	0.0012485	41.9323	9.4e-11	6_98398832_C_T	rs9387963
rs9320798	6	98399407	0	C	T	0.443494	0.994192	44.7795	2.2e-11	-0.00808696	0.00124855	41.9526	9.4e-11	6_98399407_C_T	rs9387963
rs28399442	19	41354458	0	C	A	0.978153	1	40.1063	2.4e-10	-0.0274307	0.00423539	41.9457	9.4e-11	19_41354458_C_A	rs117287096
rs13233571	7	72971231	0	C	T	0.877062	1	39.289	3.7e-10	0.0121712	0.00187969	41.9266	9.5e-11	7_72971231_C_T	rs33951980
rs2862189	11	31444646	0	G	T	0.448653	0.99776	42.811	6e-11	-0.00805007	0.00124327	41.9244	9.5e-11	11_31444646_G_T	rs2761589
rs7619139	3	25110415	0	T	A	0.41119	0.991144	36.3608	1.6e-09	-0.00815329	0.00125959	41.8997	9.6e-11	3_25110415_T_A	rs7619139
rs2495856	6	51447277	0	C	G	0.563036	0.999648	39.3353	3.6e-10	0.0080741	0.00124726	41.9056	9.6e-11	6_51447277_C_G	rs2504671
rs1961822	6	51452093	0	A	C	0.563033	0.999634	39.3256	3.6e-10	0.00807343	0.00124727	41.8982	9.6e-11	6_51452093_A_C	rs2504671
rs2439036	6	51452791	0	T	C	0.563034	0.999635	39.3352	3.6e-10	0.00807436	0.00124727	41.908	9.6e-11	6_51452791_T_C	rs2504671
rs613872	18	53210302	0	G	T	0.174273	1	41.974	9.2e-11	-0.0105705	0.0016328	41.9109	9.6e-11	18_53210302_G_T	rs784257
rs2784242	6	51454632	0	A	T	0.437197	0.999365	39.4386	3.4e-10	-0.00807457	0.00124758	41.8894	9.7e-11	6_51454632_A_T	rs2504671
rs2793351	10	22151578	0	G	A	0.310423	0.99635	42.3589	7.6e-11	0.00866059	0.00133829	41.8788	9.7e-11	10_22151578_G_A	rs7072776
rs1191519	14	29749827	0	G	A	0.94709	0.996486	48.5578	3.2e-12	-0.017862	0.00276013	41.8796	9.7e-11	14_29749827_G_A	rs1957111
rs2666756	10	22244804	0	A	T	0.313736	0.993923	42.6441	6.6e-11	0.00863787	0.00133491	41.8709	9.8e-11	10_22244804_A_T	rs7072776
rs78630402	14	29775727	0	A	G	0.947006	0.993186	48.9706	2.6e-12	-0.0178689	0.00276174	41.8629	9.8e-11	14_29775727_A_G	rs1957111
rs74040483	14	29775886	0	G	C	0.947002	0.993078	48.9535	2.6e-12	-0.0178631	0.00276181	41.8338	9.9e-11	14_29775886_G_C	rs1957111
rs1437971	2	100986964	0	A	C	0.349361	0.971504	41.5522	1.1e-10	0.00847493	0.00131191	41.7317	1e-10	2_100986964_A_C	rs1437971
rs9370029	6	51349625	0	T	A	0.82375	0.996324	48.6625	3e-12	0.010503	0.00162525	41.7627	1e-10	6_51349625_T_A	rs2504671
rs10948625	6	51429472	0	G	C	0.746637	0.998004	51.7852	6.2e-13	0.00918793	0.00142228	41.7319	1e-10	6_51429472_G_C	rs2504671
rs2495853	6	51445345	0	A	T	0.563047	0.999628	39.1397	3.9e-10	0.00805729	0.00124729	41.7297	1e-10	6_51445345_A_T	rs2504671
rs616579	6	53969932	0	G	C	0.645835	0.998768	46.5648	8.9e-12	-0.00835259	0.00129259	41.7564	1e-10	6_53969932_G_C	rs816366
rs9482120	6	98392667	0	C	A	0.398265	0.994966	42.7596	6.2e-11	-0.00818927	0.00126645	41.8131	1e-10	6_98392667_C_A	rs9387963
rs9372650	6	98395421	0	C	A	0.442737	0.995746	44.4627	2.6e-11	-0.00807035	0.00124785	41.8275	1e-10	6_98395421_C_A	rs9387963
rs7757790	6	98402394	0	A	C	0.442561	0.995626	44.4838	2.6e-11	-0.00806669	0.00124792	41.7845	1e-10	6_98402394_A_C	rs9387963
rs1191522	14	29751279	0	T	G	0.947096	0.996646	48.4989	3.3e-12	-0.0178458	0.00276004	41.8063	1e-10	14_29751279_T_G	rs1957111
rs1191523	14	29751288	0	G	A	0.947096	0.996646	48.4989	3.3e-12	-0.0178458	0.00276004	41.8063	1e-10	14_29751288_G_A	rs1957111
rs79600176	19	41392490	0	T	C	0.978265	1	39.4003	3.5e-10	-0.0274434	0.00424536	41.7876	1e-10	19_41392490_T_C	rs117287096
rs3859439	19	49224389	0	T	C	0.390807	0.996159	26.0443	3.3e-07	0.00819551	0.00126802	41.7735	1e-10	19_49224389_T_C	rs838133
rs4858697	3	25116582	0	A	G	0.418488	0.990189	35.7022	2.3e-09	-0.00810383	0.00125696	41.5661	1.1e-10	3_25116582_A_G	rs7619139
rs10948626	6	51429680	0	A	G	0.746647	0.99767	51.6375	6.7e-13	0.00917446	0.00142257	41.5924	1.1e-10	6_51429680_A_G	rs2504671
rs2397048	6	51430852	0	A	G	0.74647	0.997191	52.0011	5.5e-13	0.00918152	0.00142254	41.658	1.1e-10	6_51430852_A_G	rs2504671
rs2495852	6	51444844	0	A	G	0.563079	0.999589	39.0386	4.2e-10	0.00804982	0.00124733	41.6493	1.1e-10	6_51444844_A_G	rs2504671
rs545829	6	53970318	0	T	G	0.645878	0.998496	46.4927	9.2e-12	-0.00833997	0.00129282	41.6152	1.1e-10	6_53970318_T_G	rs816366
rs9401305	6	98331937	0	A	C	0.534405	1	43.2181	4.9e-11	0.00799347	0.00123994	41.5595	1.1e-10	6_98331937_A_C	rs9387963
rs4412208	6	98431600	0	C	T	0.441721	0.999654	43.7778	3.7e-11	-0.00803425	0.00124635	41.5536	1.1e-10	6_98431600_C_T	rs9387963
rs4460216	6	98433708	0	A	C	0.441719	0.999704	43.7943	3.6e-11	-0.00803492	0.00124637	41.5597	1.1e-10	6_98433708_A_C	rs9387963
rs34346326	7	73016181	0	T	C	0.801992	0.999406	38.9668	4.3e-10	0.0100017	0.00155082	41.5935	1.1e-10	7_73016181_T_C	rs33951980
rs2393969	10	65140440	0	A	C	0.528426	0.998318	45.9988	1.2e-11	0.00799758	0.00123941	41.6379	1.1e-10	10_65140440_A_C	rs7924036
rs2761593	11	31326752	0	G	T	0.356747	0.994994	39.8212	2.8e-10	-0.00834476	0.00129341	41.6251	1.1e-10	11_31326752_G_T	rs2761589
rs2598471	11	31447621	0	A	T	0.450684	0.994995	42.3076	7.8e-11	-0.00803801	0.00124454	41.7136	1.1e-10	11_31447621_A_T	rs2761589
rs2598472	11	31447622	0	A	T	0.450655	0.9951	42.2436	8.1e-11	-0.00803315	0.00124448	41.6672	1.1e-10	11_31447622_A_T	rs2761589
rs12589509	14	27079171	0	T	A	0.259994	0.999379	37.1263	1.1e-09	-0.00909148	0.00141037	41.5529	1.1e-10	14_27079171_T_A	rs7140993
rs1950406	14	27079598	0	A	C	0.259988	0.999406	37.129	1.1e-09	-0.00909173	0.00141036	41.556	1.1e-10	14_27079598_A_C	rs7140993
rs2224038	14	27079960	0	A	T	0.260002	0.999356	37.1702	1.1e-09	-0.00909652	0.00141037	41.5989	1.1e-10	14_27079960_A_T	rs7140993
rs1950404	14	27082912	0	T	A	0.259974	0.999655	37.2743	1e-09	-0.00910882	0.00141035	41.713	1.1e-10	14_27082912_T_A	rs7140993
rs1950403	14	27082987	0	C	G	0.259989	0.999487	37.1366	1.1e-09	-0.00909218	0.00141031	41.5632	1.1e-10	14_27082987_C_G	rs7140993
rs2207556	14	27086270	0	C	T	0.259992	0.999348	37.1858	1.1e-09	-0.00909875	0.00141037	41.6196	1.1e-10	14_27086270_C_T	rs7140993
rs4267219	14	29755382	0	C	G	0.947108	0.996327	48.384	3.5e-12	-0.0178324	0.00276088	41.7181	1.1e-10	14_29755382_C_G	rs1957111
rs11845924	14	29763895	0	G	A	0.947071	0.995251	48.4065	3.5e-12	-0.0178315	0.00276141	41.698	1.1e-10	14_29763895_G_A	rs1957111
rs4803380	19	41351169	0	C	T	0.977704	0.99206	39.9444	2.6e-10	-0.0271779	0.00420876	41.6986	1.1e-10	19_41351169_C_T	rs117287096
rs519757	19	49224966	0	A	C	0.390517	0.995917	25.9041	3.6e-07	0.00818651	0.00126829	41.6637	1.1e-10	19_49224966_A_C	rs838133
rs1317580	2	27961344	0	G	C	0.741129	0.982726	49.9866	1.5e-12	-0.00914911	0.00141981	41.5239	1.2e-10	2_27961344_G_C	rs1260326
rs519978	6	53977449	0	C	T	0.645739	0.99897	46.3672	9.8e-12	-0.00832221	0.00129238	41.4662	1.2e-10	6_53977449_C_T	rs816366
rs486135	6	53978817	0	T	G	0.645714	0.998931	46.3904	9.7e-12	-0.00832435	0.00129241	41.4858	1.2e-10	6_53978817_T_G	rs816366
rs35121390	6	98399208	0	C	G	0.601238	0.994104	42.3929	7.5e-11	0.00815298	0.0012666	41.4339	1.2e-10	6_98399208_C_G	rs9387963
rs9398648	6	98438566	0	A	T	0.441705	0.999859	43.6413	3.9e-11	-0.00801813	0.00124633	41.3882	1.2e-10	6_98438566_A_T	rs9387963
rs13240994	7	73016862	0	T	C	0.801989	0.999595	38.9185	4.4e-10	0.00999418	0.00155068	41.5385	1.2e-10	7_73016862_T_C	rs33951980
rs10159545	10	21766969	0	C	G	0.649968	0.985344	39.4906	3.3e-10	-0.00840396	0.00130463	41.4946	1.2e-10	10_21766969_C_G	rs7072776
rs1243180	10	21915619	0	T	A	0.700366	0.997109	37.5009	9.1e-10	-0.00870033	0.00135062	41.496	1.2e-10	10_21915619_T_A	rs7072776
rs2807988	10	22241212	0	T	A	0.3119	0.994649	42.11	8.6e-11	0.00861688	0.00133725	41.5215	1.2e-10	10_22241212_T_A	rs7072776
rs4746204	10	65328518	0	C	T	0.520987	0.998725	42.6234	6.6e-11	-0.00796934	0.00123867	41.394	1.2e-10	10_65328518_C_T	rs7924036
rs7907451	10	65328740	0	T	A	0.521012	0.998682	42.6888	6.4e-11	-0.00797151	0.00123867	41.4162	1.2e-10	10_65328740_T_A	rs7924036
rs7100409	10	65330195	0	T	A	0.521048	0.998458	42.6599	6.5e-11	-0.00797271	0.00123878	41.4212	1.2e-10	10_65330195_T_A	rs7924036
rs7100413	10	65330208	0	T	C	0.521048	0.998458	42.6793	6.4e-11	-0.00797437	0.00123878	41.4387	1.2e-10	10_65330208_T_C	rs7924036
rs3847326	10	65331859	0	A	G	0.520887	0.998078	42.7056	6.4e-11	-0.00798143	0.00123883	41.5089	1.2e-10	10_65331859_A_G	rs7924036
rs2616815	11	31327316	0	C	T	0.356518	0.995061	39.7566	2.9e-10	-0.00833587	0.0012936	41.5241	1.2e-10	11_31327316_C_T	rs2761589
rs1323738	11	31344898	0	T	C	0.35666	0.995539	39.5917	3.1e-10	-0.00831935	0.00129313	41.3897	1.2e-10	11_31344898_T_C	rs2761589
rs6575068	14	27071318	0	C	T	0.25711	0.995312	37.9843	7.1e-10	-0.009138	0.00141801	41.5285	1.2e-10	14_27071318_C_T	rs7140993
rs2224039	14	27075493	0	C	T	0.259993	0.998882	37.0005	1.2e-09	-0.00907878	0.0014107	41.4179	1.2e-10	14_27075493_C_T	rs7140993
rs1955822	14	27083239	0	T	G	0.260095	1	37.0088	1.2e-09	-0.00908333	0.00141047	41.4726	1.2e-10	14_27083239_T_G	rs7140993
rs1950402	14	27085685	0	A	G	0.260006	0.999241	37.0352	1.2e-09	-0.00908277	0.00141043	41.47	1.2e-10	14_27085685_A_G	rs7140993
rs11850607	14	29758445	0	A	G	0.947085	0.996159	48.2214	3.8e-12	-0.0177884	0.00276051	41.5234	1.2e-10	14_29758445_A_G	rs1957111
rs11850677	14	29758639	0	A	G	0.947083	0.996116	48.1526	3.9e-12	-0.0177737	0.00276048	41.4559	1.2e-10	14_29758639_A_G	rs1957111
rs1555417	14	29760868	0	C	A	0.947076	0.996013	48.1806	3.9e-12	-0.0177836	0.00276049	41.5018	1.2e-10	14_29760868_C_A	rs1957111
rs11849844	14	29762101	0	T	C	0.947116	0.995293	48.2573	3.7e-12	-0.0178048	0.00276245	41.5418	1.2e-10	14_29762101_T_C	rs1957111
rs74040471	14	29763051	0	A	C	0.947108	0.995788	48.1681	3.9e-12	-0.0177868	0.00276156	41.4845	1.2e-10	14_29763051_A_C	rs1957111
rs78766459	14	29767523	0	C	G	0.947107	0.995333	48.2021	3.8e-12	-0.0177942	0.00276192	41.508	1.2e-10	14_29767523_C_G	rs1957111
rs74040475	14	29770063	0	C	T	0.947074	0.994815	48.1344	4e-12	-0.0177838	0.00276183	41.4625	1.2e-10	14_29770063_C_T	rs1957111
rs11845297	14	29771796	0	A	G	0.947101	0.995236	48.1334	4e-12	-0.0177844	0.00276189	41.4634	1.2e-10	14_29771796_A_G	rs1957111
rs74040478	14	29772126	0	T	C	0.947101	0.995233	48.1339	4e-12	-0.0177843	0.00276188	41.4631	1.2e-10	14_29772126_T_C	rs1957111
rs74040479	14	29773004	0	G	C	0.947087	0.994878	48.1581	3.9e-12	-0.0177901	0.00276194	41.4887	1.2e-10	14_29773004_G_C	rs1957111
rs4803378	19	41333441	0	G	A	0.978217	1	39.437	3.4e-10	-0.0272643	0.00423583	41.4296	1.2e-10	19_41333441_G_A	rs117287096
rs16850592	2	166265016	0	T	C	0.758963	0.991084	45.3442	1.7e-11	0.00931811	0.00144861	41.3761	1.3e-10	2_166265016_T_C	rs16850592
rs16850608	2	166267016	0	A	G	0.758922	0.991366	45.3879	1.6e-11	0.00931492	0.00144821	41.3708	1.3e-10	2_166267016_A_G	rs16850592
rs12475216	2	166268325	0	G	A	0.75891	0.991461	45.3957	1.6e-11	0.00931466	0.00144812	41.3737	1.3e-10	2_166268325_G_A	rs16850592
rs13156027	5	148040384	0	C	T	0.755659	0.992888	43.9097	3.4e-11	0.00927642	0.00144381	41.2802	1.3e-10	5_148040384_C_T	rs13163314
rs12211950	6	51432551	0	C	T	0.746083	0.998241	51.5996	6.8e-13	0.00913538	0.00142103	41.3282	1.3e-10	6_51432551_C_T	rs2504671
rs2495851	6	51441117	0	G	C	0.563277	0.996587	39.026	4.2e-10	0.00801975	0.00124887	41.2372	1.3e-10	6_51441117_G_C	rs2504671
rs1321892	6	53961327	0	A	G	0.349406	0.996075	46.0054	1.2e-11	0.0083429	0.00129819	41.3006	1.3e-10	6_53961327_A_G	rs816366
rs1028804	6	53971401	0	G	A	0.355005	0.997889	46.2532	1e-11	0.00831267	0.00129223	41.3809	1.3e-10	6_53971401_G_A	rs816366
rs506096	6	53975187	0	T	C	0.645739	0.998895	46.2437	1e-11	-0.00831245	0.00129243	41.3657	1.3e-10	6_53975187_T_C	rs816366
rs670463	6	53977495	0	A	G	0.645197	0.998574	46.2467	1e-11	-0.00831128	0.00129204	41.3793	1.3e-10	6_53977495_A_G	rs816366
rs9474739	6	53982560	0	T	C	0.645941	0.999154	46.1499	1.1e-11	-0.00830889	0.00129253	41.3244	1.3e-10	6_53982560_T_C	rs816366
rs12189679	6	98333409	0	G	A	0.535002	0.998463	42.8906	5.8e-11	0.00797932	0.0012405	41.3749	1.3e-10	6_98333409_G_A	rs9387963
rs4240559	6	98437775	0	T	C	0.44171	0.999864	43.5718	4.1e-11	-0.00801136	0.00124633	41.3187	1.3e-10	6_98437775_T_C	rs9387963
rs4368816	6	98439152	0	T	A	0.44172	0.999842	43.5813	4.1e-11	-0.00801264	0.00124634	41.3312	1.3e-10	6_98439152_T_A	rs9387963
rs7084454	10	21821274	0	G	A	0.677161	0.995785	37.4526	9.4e-10	-0.00851672	0.00132388	41.3852	1.3e-10	10_21821274_G_A	rs7072776
rs12356674	10	21889083	0	G	T	0.713129	1	37.8073	7.8e-10	-0.00879804	0.00136822	41.3487	1.3e-10	10_21889083_G_T	rs7072776
rs1086896	10	22176062	0	T	C	0.302216	0.996996	43.779	3.7e-11	0.0086682	0.00134752	41.38	1.3e-10	10_22176062_T_C	rs7072776
rs2666760	10	22255097	0	T	C	0.310197	0.995524	42.2268	8.1e-11	0.00860581	0.00133894	41.3107	1.3e-10	10_22255097_T_C	rs7072776
rs4746205	10	65329518	0	A	G	0.521056	0.998549	42.6303	6.6e-11	-0.00796865	0.00123875	41.3812	1.3e-10	10_65329518_A_G	rs7924036
rs3847325	10	65331511	0	G	C	0.521088	0.998214	42.5717	6.8e-11	-0.00796741	0.00123889	41.359	1.3e-10	10_65331511_G_C	rs7924036
rs2447671	11	31334323	0	G	A	0.357007	0.995318	39.4591	3.4e-10	-0.00830501	0.00129286	41.2644	1.3e-10	11_31334323_G_A	rs2761589
rs1900931	12	78789316	0	A	G	0.604074	0.988593	41.9028	9.6e-11	0.00817443	0.0012711	41.3578	1.3e-10	12_78789316_A_G	rs12581220
rs1950408	14	27075414	0	A	G	0.259999	0.998866	36.9253	1.2e-09	-0.00906956	0.00141068	41.3346	1.3e-10	14_27075414_A_G	rs7140993
rs1115240	14	27090388	0	G	C	0.259991	0.998798	36.9014	1.2e-09	-0.00906571	0.0014106	41.3042	1.3e-10	14_27090388_G_C	rs7140993
rs59484001	14	29767895	0	C	T	0.947128	0.994943	48.085	4.1e-12	-0.0177748	0.00276304	41.3841	1.3e-10	14_29767895_C_T	rs1957111
rs16850602	2	166266891	0	A	G	0.758913	0.991559	45.2352	1.7e-11	0.00929647	0.00144817	41.2093	1.4e-10	2_166266891_A_G	rs16850592
rs13097918	3	35676330	0	T	A	0.787416	0.994979	35.2486	2.9e-09	-0.00970507	0.00151307	41.1413	1.4e-10	3_35676330_T_A	rs1513481
rs515501	6	53977911	0	A	T	0.645707	0.999086	46.1227	1.1e-11	-0.00829696	0.0012924	41.2141	1.4e-10	6_53977911_A_T	rs816366
rs4521576	6	53982990	0	A	C	0.354869	0.998769	46.0397	1.2e-11	0.00829325	0.00129193	41.2074	1.4e-10	6_53982990_A_C	rs816366
rs12662607	6	98329264	0	G	C	0.534456	0.999823	42.7915	6.1e-11	0.00795421	0.00123989	41.1552	1.4e-10	6_98329264_G_C	rs9387963
rs9372620	6	98330025	0	G	A	0.534423	0.999891	42.7404	6.3e-11	0.00795302	0.00123983	41.1471	1.4e-10	6_98330025_G_A	rs9387963
rs7756023	6	98330225	0	G	A	0.534414	0.99991	42.7139	6.3e-11	0.00795104	0.00123983	41.1266	1.4e-10	6_98330225_G_A	rs9387963
rs7744474	6	98330626	0	C	T	0.534393	0.999676	42.7487	6.2e-11	0.00795465	0.00123982	41.1649	1.4e-10	6_98330626_C_T	rs9387963
rs9490000	6	98331085	0	C	G	0.53441	0.999904	42.7366	6.3e-11	0.0079542	0.00123983	41.1595	1.4e-10	6_98331085_C_G	rs9387963
rs9490001	6	98331133	0	T	C	0.534413	0.999922	42.7256	6.3e-11	0.00795267	0.00123982	41.1441	1.4e-10	6_98331133_T_C	rs9387963
rs9490003	6	98331316	0	A	G	0.534405	0.999936	42.7511	6.2e-11	0.00795402	0.00123982	41.1584	1.4e-10	6_98331316_A_G	rs9387963
rs9320759	6	98331357	0	A	G	0.534407	0.999926	42.7512	6.2e-11	0.00795402	0.00123982	41.158	1.4e-10	6_98331357_A_G	rs9387963
rs10484867	6	98332567	0	G	A	0.534466	0.999768	42.7971	6.1e-11	0.00795527	0.00123992	41.1642	1.4e-10	6_98332567_G_A	rs9387963
rs10484868	6	98332622	0	C	T	0.534466	0.999763	42.7976	6.1e-11	0.00795523	0.00123993	41.1637	1.4e-10	6_98332622_C_T	rs9387963
rs7775492	6	98332930	0	A	G	0.534472	0.999622	42.7812	6.1e-11	0.00795375	0.00123999	41.144	1.4e-10	6_98332930_A_G	rs9387963
rs9320823	6	98429337	0	T	C	0.397441	0.999049	41.6459	1.1e-10	-0.00811509	0.00126476	41.1693	1.4e-10	6_98429337_T_C	rs9387963
rs10872224	6	98435125	0	G	T	0.397466	0.999155	41.5787	1.1e-10	-0.00810865	0.00126466	41.1102	1.4e-10	6_98435125_G_T	rs9387963
rs35368205	7	73017657	0	C	T	0.801769	1	38.6	5.2e-10	0.00992689	0.00154688	41.1827	1.4e-10	7_73017657_C_T	rs33951980
rs4024198	10	22092310	0	C	G	0.293598	0.995684	42.2456	8.1e-11	0.0087239	0.0013588	41.22	1.4e-10	10_22092310_C_G	rs7072776
rs4746203	10	65323997	0	G	T	0.521037	0.999203	42.4931	7.1e-11	-0.00795152	0.00123845	41.2232	1.4e-10	10_65323997_G_T	rs7924036
rs2616792	11	31324298	0	T	G	0.356192	0.994991	39.4485	3.4e-10	-0.00829697	0.00129389	41.1192	1.4e-10	11_31324298_T_G	rs2761589
rs7928522	11	31336977	0	A	G	0.356763	0.995382	39.3429	3.6e-10	-0.00829073	0.0012931	41.1075	1.4e-10	11_31336977_A_G	rs2761589
rs10835763	11	31345574	0	G	A	0.356773	0.995395	39.3949	3.5e-10	-0.00829496	0.00129308	41.1506	1.4e-10	11_31345574_G_A	rs2761589
rs7122895	11	31346620	0	G	C	0.356773	0.995392	39.4125	3.4e-10	-0.00829652	0.00129308	41.1661	1.4e-10	11_31346620_G_C	rs2761589
rs11161051	14	29744314	0	T	C	0.0528004	1	47.4132	5.7e-12	0.0176999	0.00276029	41.1184	1.4e-10	14_29744314_T_C	rs1957111
rs2058908	16	53806145	0	T	C	0.263287	1	46.0372	1.2e-11	-0.00900202	0.00140376	41.124	1.4e-10	16_53806145_T_C	rs11642015
rs2359774	3	35675051	0	G	C	0.787017	0.995335	35.2995	2.8e-09	-0.00969044	0.00151174	41.0897	1.5e-10	3_35675051_G_C	rs1513481
rs13177716	5	148034502	0	G	A	0.762486	0.991474	43.9477	3.4e-11	0.0093406	0.00145905	40.9834	1.5e-10	5_148034502_G_A	rs13163314
rs58862611	5	148041361	0	G	A	0.75585	0.993241	43.6536	3.9e-11	0.00925196	0.00144391	41.0569	1.5e-10	5_148041361_G_A	rs13163314
rs7720668	5	148042230	0	G	T	0.755888	0.993204	43.6457	3.9e-11	0.00925028	0.001444	41.0367	1.5e-10	5_148042230_G_T	rs13163314
rs2439032	6	51421707	0	T	C	0.563531	0.995878	39.1625	3.9e-10	0.00800176	0.00124945	41.0141	1.5e-10	6_51421707_T_C	rs2504671
rs4524616	6	98445008	0	C	A	0.441866	1	43.2955	4.7e-11	-0.0079866	0.0012463	41.0654	1.5e-10	6_98445008_C_A	rs9387963
rs13226650	7	73017005	0	A	G	0.801806	0.998902	38.4468	5.6e-10	0.00992591	0.00155028	40.9938	1.5e-10	7_73017005_A_G	rs33951980
rs12251016	10	21821918	0	A	T	0.656199	0.997125	36.3197	1.7e-09	-0.00834937	0.00130272	41.0775	1.5e-10	10_21821918_A_T	rs7072776
rs12769128	10	21883430	0	C	T	0.703955	0.997976	37.5735	8.8e-10	-0.00867918	0.00135542	41.0025	1.5e-10	10_21883430_C_T	rs7072776
rs792460	10	22118445	0	A	T	0.304896	0.9959	43.5931	4e-11	0.00861904	0.00134458	41.0909	1.5e-10	10_22118445_A_T	rs7072776
rs2666762	10	22255701	0	G	A	0.312057	0.994575	42.2196	8.2e-11	0.00855803	0.00133689	40.9785	1.5e-10	10_22255701_G_A	rs7072776
rs12050159	14	27073705	0	C	T	0.256485	0.996051	37.3983	9.6e-10	-0.00908645	0.00141874	41.0186	1.5e-10	14_27073705_C_T	rs7140993
rs12433692	14	27074370	0	C	A	0.263708	0.997172	37.1742	1.1e-09	-0.00900213	0.00140505	41.0493	1.5e-10	14_27074370_C_A	rs7140993
rs186051747	19	41342042	0	G	A	0.97792	0.997929	39.2088	3.8e-10	-0.02697	0.00421208	40.9987	1.5e-10	19_41342042_G_A	rs117287096
rs117540499	19	41406448	0	G	A	0.977825	0.991593	40.3259	2.1e-10	-0.0270063	0.0042189	40.9762	1.5e-10	19_41406448_G_A	rs117287096
rs1269454	10	21937919	0	G	A	0.705265	0.996211	36.5598	1.5e-09	-0.00869185	0.00135805	40.9632	1.6e-10	10_21937919_G_A	rs7072776
rs11012840	10	22275118	0	C	T	0.312753	0.992212	42.0567	8.9e-11	0.00856379	0.00133802	40.9643	1.6e-10	10_22275118_C_T	rs7072776
rs7073746	10	64904071	0	A	G	0.527653	0.998537	44.6799	2.3e-11	0.00792172	0.00123926	40.8616	1.6e-10	10_64904071_A_G	rs7924036
rs12245367	10	65321464	0	C	T	0.521036	0.998875	42.0954	8.7e-11	-0.00792709	0.00123863	40.9583	1.6e-10	10_65321464_C_T	rs7924036
rs6575069	14	27071382	0	G	A	0.25879	0.996173	36.9009	1.2e-09	-0.00905253	0.00141469	40.9463	1.6e-10	14_27071382_G_A	rs7140993
rs10136360	14	79894046	0	G	A	0.779217	0.98808	43.4124	4.4e-11	-0.00957388	0.00149765	40.8654	1.6e-10	14_79894046_G_A	rs10136360
rs62174721	2	166278584	0	A	G	0.75973	0.992314	44.6919	2.3e-11	0.00925263	0.00144925	40.7608	1.7e-10	2_166278584_A_G	rs16850592
rs2163709	2	166279015	0	A	T	0.759747	0.99227	44.7117	2.3e-11	0.00925352	0.00144931	40.7656	1.7e-10	2_166279015_A_T	rs16850592
rs34598101	5	148035239	0	G	C	0.762451	0.991584	43.7063	3.8e-11	0.00931088	0.00145889	40.7318	1.7e-10	5_148035239_G_C	rs13163314
rs56229761	5	148035444	0	C	G	0.762451	0.991584	43.7063	3.8e-11	0.00931088	0.00145889	40.7318	1.7e-10	5_148035444_C_G	rs13163314
rs61512981	5	148036431	0	G	A	0.762452	0.991608	43.7038	3.8e-11	0.00931047	0.00145888	40.729	1.7e-10	5_148036431_G_A	rs13163314
rs34643523	5	148036560	0	A	G	0.762453	0.991602	43.71	3.8e-11	0.00931117	0.00145888	40.7349	1.7e-10	5_148036560_A_G	rs13163314
rs35265258	5	148037763	0	A	G	0.762452	0.99157	43.706	3.8e-11	0.00931044	0.00145888	40.7288	1.7e-10	5_148037763_A_G	rs13163314
rs13164335	5	148038154	0	A	G	0.762468	0.991502	43.6909	3.8e-11	0.0093109	0.00145897	40.7278	1.7e-10	5_148038154_A_G	rs13163314
rs34285995	5	148038289	0	C	T	0.762452	0.99157	43.706	3.8e-11	0.00931044	0.00145888	40.7288	1.7e-10	5_148038289_C_T	rs13163314
rs888963	5	148038817	0	C	T	0.762447	0.991568	43.7444	3.7e-11	0.00931459	0.00145888	40.7654	1.7e-10	5_148038817_C_T	rs13163314
rs33976732	5	148039634	0	C	T	0.762409	0.991203	43.7675	3.7e-11	0.00931778	0.00145891	40.7911	1.7e-10	5_148039634_C_T	rs13163314
rs62387966	5	148039806	0	C	T	0.762451	0.991595	43.7086	3.8e-11	0.00931066	0.00145887	40.7314	1.7e-10	5_148039806_C_T	rs13163314
rs6885118	5	148115827	0	G	C	0.783851	0.994935	39.9273	2.6e-10	0.00960941	0.00150455	40.7926	1.7e-10	5_148115827_G_C	rs13163314
rs685893	6	53961784	0	A	G	0.648162	0.998941	45.8748	1.3e-11	-0.00826955	0.00129452	40.8083	1.7e-10	6_53961784_A_G	rs816366
rs490628	6	53968910	0	C	T	0.649046	0.996281	46.1817	1.1e-11	-0.00828516	0.00129688	40.8133	1.7e-10	6_53968910_C_T	rs816366
rs2039719	6	98326863	0	G	A	0.534289	0.999812	42.4576	7.2e-11	0.00791272	0.00123978	40.7343	1.7e-10	6_98326863_G_A	rs9387963
rs9387845	6	98328963	0	C	A	0.534285	0.999839	42.5053	7e-11	0.00791621	0.00123978	40.7705	1.7e-10	6_98328963_C_A	rs9387963
rs12662596	6	98329165	0	G	A	0.534281	0.999852	42.5258	7e-11	0.00791839	0.00123977	40.7934	1.7e-10	6_98329165_G_A	rs9387963
rs1086897	10	22176431	0	A	G	0.302373	0.996604	43.0438	5.4e-11	0.00860482	0.0013475	40.7782	1.7e-10	10_22176431_A_G	rs7072776
rs13095	10	64914372	0	G	C	0.527693	0.999109	44.6144	2.4e-11	0.00791715	0.00123893	40.8362	1.7e-10	10_64914372_G_C	rs7924036
rs7899657	10	65323265	0	G	A	0.521677	0.998795	42.0909	8.7e-11	-0.00791244	0.00123868	40.8039	1.7e-10	10_65323265_G_A	rs7924036
rs10733793	10	65323809	0	T	G	0.513309	1	43.7436	3.7e-11	0.00791453	0.00123873	40.8225	1.7e-10	10_65323809_T_G	rs7924036
rs10822181	10	65325126	0	G	A	0.521538	0.999239	42.0277	9e-11	-0.00790526	0.00123839	40.7489	1.7e-10	10_65325126_G_A	rs7924036
rs10150482	14	79891882	0	G	A	0.779164	0.98788	43.325	4.6e-11	-0.00955992	0.00149751	40.7541	1.7e-10	14_79891882_G_A	rs10136360
rs13173350	5	148033473	0	C	A	0.762326	0.991151	43.7452	3.7e-11	0.00930511	0.00145878	40.6876	1.8e-10	5_148033473_C_A	rs13163314
rs13161058	5	148034874	0	A	G	0.762453	0.991549	43.6954	3.8e-11	0.00931043	0.00145894	40.7254	1.8e-10	5_148034874_A_G	rs13163314
rs888961	5	148038897	0	C	A	0.762428	0.991478	43.6666	3.9e-11	0.00930736	0.00145891	40.7002	1.8e-10	5_148038897_C_A	rs13163314
rs9320747	6	98310291	0	T	G	0.533586	0.992756	42.759	6.2e-11	0.00793449	0.0012435	40.7139	1.8e-10	6_98310291_T_G	rs9387963
rs9401250	6	98316447	0	C	T	0.534365	0.997392	42.324	7.7e-11	0.00791157	0.0012412	40.6294	1.8e-10	6_98316447_C_T	rs9387963
rs4142530	6	98322282	0	T	C	0.534314	0.999682	42.3988	7.4e-11	0.00790907	0.00123987	40.6911	1.8e-10	6_98322282_T_C	rs9387963
rs12205774	6	98324132	0	C	T	0.534288	0.999716	42.3932	7.5e-11	0.00790823	0.00123983	40.6851	1.8e-10	6_98324132_C_T	rs9387963
rs9401278	6	98324943	0	C	A	0.534295	0.999742	42.3966	7.5e-11	0.00790761	0.00123982	40.6795	1.8e-10	6_98324943_C_A	rs9387963
rs9387823	6	98325000	0	C	A	0.534297	0.999751	42.4012	7.4e-11	0.0079083	0.00123981	40.6869	1.8e-10	6_98325000_C_A	rs9387963
rs9489980	6	98325541	0	A	G	0.534302	0.999753	42.4235	7.4e-11	0.00791124	0.00123982	40.7169	1.8e-10	6_98325541_A_G	rs9387963
rs4839927	6	98325884	0	G	A	0.534303	0.999752	42.4217	7.4e-11	0.00791103	0.00123982	40.7147	1.8e-10	6_98325884_G_A	rs9387963
rs4839928	6	98326012	0	A	G	0.534302	0.999753	42.4235	7.4e-11	0.00791124	0.00123982	40.7169	1.8e-10	6_98326012_A_G	rs9387963
rs4839929	6	98326080	0	G	C	0.534217	0.99946	42.4421	7.3e-11	0.00791308	0.00124	40.7235	1.8e-10	6_98326080_G_C	rs9387963
rs1243185	10	21902587	0	T	A	0.699559	0.997091	36.358	1.6e-09	-0.00861315	0.00134969	40.7248	1.8e-10	10_21902587_T_A	rs7072776
rs10740136	10	65329622	0	A	C	0.513678	0.99916	43.6466	3.9e-11	0.00789308	0.00123792	40.6546	1.8e-10	10_65329622_A_C	rs7924036
rs56333659	5	148031956	0	A	G	0.761828	0.989147	43.5624	4.1e-11	0.00928808	0.00145914	40.5187	1.9e-10	5_148031956_A_G	rs13163314
rs57644098	5	148031958	0	C	T	0.761795	0.98924	43.5868	4.1e-11	0.00929055	0.00145903	40.5467	1.9e-10	5_148031958_C_T	rs13163314
rs9374896	6	98310484	0	C	T	0.53368	0.992628	42.6872	6.4e-11	0.00791713	0.00124364	40.5272	1.9e-10	6_98310484_C_T	rs9387963
rs12766229	10	21769994	0	C	G	0.727423	0.992821	38.906	4.4e-10	-0.00886348	0.00139224	40.5302	1.9e-10	10_21769994_C_G	rs7072776
rs2861449	11	31348937	0	A	G	0.356993	0.994416	38.7409	4.8e-10	-0.00823659	0.00129353	40.5453	1.9e-10	11_31348937_A_G	rs2761589
rs12305059	12	78784036	0	T	A	0.606902	0.99401	44.0237	3.2e-11	0.00808797	0.00126957	40.5849	1.9e-10	12_78784036_T_A	rs12581220
rs10136393	14	29736896	0	T	G	0.0529889	0.997544	46.9863	7.1e-12	0.0175638	0.00275753	40.5691	1.9e-10	14_29736896_T_G	rs1957111
rs1022668	14	29737645	0	C	A	0.0529887	0.997615	46.9624	7.2e-12	0.0175611	0.00275746	40.5588	1.9e-10	14_29737645_C_A	rs1957111
rs4981048	14	29741549	0	A	T	0.0529739	0.997862	46.9589	7.2e-12	0.0175561	0.00275751	40.5341	1.9e-10	14_29741549_A_T	rs1957111
rs62174720	2	166270636	0	C	T	0.75971	0.991981	44.3902	2.7e-11	0.00922372	0.00144943	40.4966	2e-10	2_166270636_C_T	rs16850592
rs12619374	2	166271665	0	C	T	0.759689	0.991918	44.3115	2.8e-11	0.00921636	0.00144944	40.4316	2e-10	2_166271665_C_T	rs16850592
rs1229984	4	100239319	0	T	C	0.0265565	1	52.0223	5.5e-13	0.0241902	0.00380397	40.4393	2e-10	4_100239319_T_C	rs1229984
rs10456647	6	51496824	0	C	T	0.733013	0.993784	44.6557	2.3e-11	0.00891921	0.0014027	40.432	2e-10	6_51496824_C_T	rs2504671
rs1407229	6	53971921	0	T	C	0.35179	0.995616	45.8515	1.3e-11	0.00824439	0.00129638	40.4437	2e-10	6_53971921_T_C	rs816366
rs9374897	6	98310571	0	G	A	0.533711	0.992797	42.5963	6.7e-11	0.00790888	0.00124356	40.4482	2e-10	6_98310571_G_A	rs9387963
rs12357321	10	21790476	0	G	A	0.687079	0.980299	36.3545	1.6e-09	-0.00856304	0.00134569	40.4915	2e-10	10_21790476_G_A	rs7072776
rs34719019	10	21885577	0	A	T	0.727129	0.990213	36.1067	1.9e-09	-0.00887572	0.00139447	40.5126	2e-10	10_21885577_A_T	rs7072776
rs4747438	10	22124263	0	C	T	0.322479	0.992656	40.2402	2.2e-10	0.00843324	0.00132611	40.4415	2e-10	10_22124263_C_T	rs7072776
rs792456	10	22174541	0	C	T	0.299813	0.993107	41.5122	1.2e-10	0.00860597	0.00135232	40.4984	2e-10	10_22174541_C_T	rs7072776
rs4633333	10	65328539	0	C	G	0.513704	0.999335	43.523	4.2e-11	0.00787866	0.00123783	40.512	2e-10	10_65328539_C_G	rs7924036
rs8007228	14	29739233	0	A	G	0.0529783	0.996935	46.9019	7.5e-12	0.0175446	0.00275748	40.4823	2e-10	14_29739233_A_G	rs1957111
rs7161167	14	29740046	0	A	G	0.0529806	0.996875	46.9369	7.3e-12	0.0175457	0.00275744	40.4885	2e-10	14_29740046_A_G	rs1957111
rs8013514	14	29741464	0	T	C	0.0529722	0.997873	46.9165	7.4e-12	0.0175493	0.00275753	40.5023	2e-10	14_29741464_T_C	rs1957111
rs1996928	20	51261414	0	G	A	0.744975	0.988898	37.1485	1.1e-09	0.00904149	0.00142159	40.4512	2e-10	20_51261414_G_A	rs1996928
rs16850629	2	166274959	0	G	A	0.759773	0.992184	44.2436	2.9e-11	0.00921423	0.00144938	40.4163	2.1e-10	2_166274959_G_A	rs16850592
rs55683014	5	148032931	0	C	T	0.761595	0.990351	43.231	4.9e-11	0.00925885	0.00145784	40.3361	2.1e-10	5_148032931_C_T	rs13163314
rs1830949	6	53964704	0	T	G	0.350677	0.995001	45.8997	1.2e-11	0.00824624	0.00129772	40.3786	2.1e-10	6_53964704_T_G	rs816366
rs816367	6	53995542	0	G	C	0.365927	0.998593	44.9368	2e-11	0.00815489	0.00128291	40.4055	2.1e-10	6_53995542_G_C	rs816366
rs1933721	6	98313223	0	C	G	0.533718	0.994682	42.4634	7.2e-11	0.00789411	0.00124245	40.3688	2.1e-10	6_98313223_C_G	rs9387963
rs11012722	10	21772167	0	A	G	0.727448	0.993984	38.7205	4.9e-10	-0.00884527	0.0013915	40.407	2.1e-10	10_21772167_A_G	rs7072776
rs10822182	10	65325478	0	G	A	0.513678	0.999823	43.3975	4.5e-11	0.00786603	0.00123762	40.3956	2.1e-10	10_65325478_G_A	rs7924036
rs1562308	2	61768421	0	A	C	0.395945	0.998966	42.1208	8.6e-11	-0.00801334	0.0012631	40.2486	2.2e-10	2_61768421_A_C	rs1562308
rs6906737	6	98345853	0	T	A	0.530834	0.987073	42.9873	5.5e-11	0.00791295	0.00124694	40.2701	2.2e-10	6_98345853_T_A	rs9387963
rs35099767	6	98546547	0	G	T	0.622884	0.993235	42.4241	7.3e-11	0.0081224	0.00128042	40.2403	2.2e-10	6_98546547_G_T	rs9387963
rs7112412	11	31370271	0	T	C	0.358947	0.994395	38.2847	6.1e-10	-0.00819656	0.00129186	40.2561	2.2e-10	11_31370271_T_C	rs2761589
rs17109221	14	79910119	0	C	T	0.779994	0.992109	42.9944	5.5e-11	-0.00950454	0.00149685	40.3187	2.2e-10	14_79910119_C_T	rs10136360
rs4433823	16	30433730	0	A	G	0.13	0.972127	43.2905	4.7e-11	-0.0117962	0.00185895	40.267	2.2e-10	16_30433730_A_G	rs4788415
rs143303864	19	41336272	0	G	A	0.977956	0.997701	38.5614	5.3e-10	-0.0267497	0.00421497	40.2762	2.2e-10	19_41336272_G_A	rs117287096
rs6742276	2	61768745	0	G	A	0.396226	0.999091	42.0769	8.8e-11	-0.00800503	0.00126286	40.1806	2.3e-10	2_61768745_G_A	rs1562308
rs1862341	5	148030150	0	T	C	0.761302	0.990068	43.0451	5.3e-11	0.00923669	0.00145746	40.1642	2.3e-10	5_148030150_T_C	rs13163314
rs1862340	5	148030286	0	A	C	0.761303	0.990079	43.0546	5.3e-11	0.00923778	0.00145746	40.1739	2.3e-10	5_148030286_A_C	rs13163314
rs56210805	5	148030409	0	A	C	0.761303	0.990079	43.0546	5.3e-11	0.00923778	0.00145746	40.1739	2.3e-10	5_148030409_A_C	rs13163314
rs13177014	5	148030594	0	A	G	0.761303	0.990088	43.0605	5.3e-11	0.00923825	0.00145745	40.1783	2.3e-10	5_148030594_A_G	rs13163314
rs36055891	5	148030655	0	T	A	0.761303	0.990088	43.0605	5.3e-11	0.00923825	0.00145745	40.1783	2.3e-10	5_148030655_T_A	rs13163314
rs13156592	5	148030762	0	G	T	0.761302	0.990088	43.0513	5.3e-11	0.00923705	0.00145745	40.168	2.3e-10	5_148030762_G_T	rs13163314
rs35603339	5	148030961	0	C	A	0.761304	0.9901	43.0681	5.3e-11	0.00923899	0.00145744	40.1852	2.3e-10	5_148030961_C_A	rs13163314
rs55926330	5	148031051	0	C	T	0.761303	0.9901	43.0671	5.3e-11	0.00923889	0.00145744	40.1843	2.3e-10	5_148031051_C_T	rs13163314
rs55899027	5	148031074	0	T	G	0.761304	0.9901	43.0681	5.3e-11	0.00923899	0.00145744	40.1852	2.3e-10	5_148031074_T_G	rs13163314
rs56006283	5	148031190	0	T	C	0.761304	0.990118	43.0717	5.3e-11	0.00923934	0.00145743	40.1889	2.3e-10	5_148031190_T_C	rs13163314
rs55802510	5	148031512	0	C	T	0.761304	0.990132	43.0735	5.3e-11	0.00923939	0.00145742	40.1898	2.3e-10	5_148031512_C_T	rs13163314
rs56289442	5	148031667	0	A	G	0.761292	0.990105	43.1235	5.1e-11	0.009243	0.00145742	40.2212	2.3e-10	5_148031667_A_G	rs13163314
rs2400643	5	148114897	0	A	G	0.766668	0.995625	39.5913	3.1e-10	0.00927634	0.00146336	40.1839	2.3e-10	5_148114897_A_G	rs13163314
rs66934412	10	21774601	0	A	T	0.727746	0.995035	38.4538	5.6e-10	-0.00881974	0.00139122	40.19	2.3e-10	10_21774601_A_T	rs7072776
rs494464	11	31386150	0	C	T	0.358838	0.994388	38.1089	6.7e-10	-0.00818727	0.00129196	40.1589	2.3e-10	11_31386150_C_T	rs2761589
rs9537160	13	56109838	0	C	T	0.721695	0.990716	40.8469	1.6e-10	0.00877585	0.00138362	40.2298	2.3e-10	13_56109838_C_T	rs9537160
rs8124744	20	51261895	0	A	G	0.745013	0.988556	36.9964	1.2e-09	0.00900999	0.00142186	40.1546	2.3e-10	20_51261895_A_G	rs1996928
rs62389023	5	148028763	0	T	C	0.761303	0.989956	42.9867	5.5e-11	0.00923044	0.00145753	40.1058	2.4e-10	5_148028763_T_C	rs13163314
rs62389024	5	148028797	0	C	T	0.761303	0.989956	42.9867	5.5e-11	0.00923044	0.00145753	40.1058	2.4e-10	5_148028797_C_T	rs13163314
rs36120141	5	148029097	0	A	C	0.761304	0.989976	42.9948	5.5e-11	0.00923108	0.00145752	40.1121	2.4e-10	5_148029097_A_C	rs13163314
rs34111912	5	148029691	0	A	G	0.761304	0.990025	43.0152	5.4e-11	0.00923266	0.00145749	40.1275	2.4e-10	5_148029691_A_G	rs13163314
rs2400642	5	148114806	0	A	G	0.766645	0.995653	39.5452	3.2e-10	0.00927197	0.00146328	40.1502	2.4e-10	5_148114806_A_G	rs13163314
rs9296658	6	51489948	0	G	C	0.732609	0.993957	44.2203	2.9e-11	0.00887437	0.00140176	40.0798	2.4e-10	6_51489948_G_C	rs2504671
rs2039722	6	98314912	0	A	G	0.533776	0.996756	42.0521	8.9e-11	0.00786482	0.00124134	40.1417	2.4e-10	6_98314912_A_G	rs9387963
rs12540011	7	72991704	0	G	A	0.716434	0.999505	39.9298	2.6e-10	0.0086857	0.00137076	40.1503	2.4e-10	7_72991704_G_A	rs33951980
rs6484500	11	31355524	0	A	C	0.35899	0.994468	38.1637	6.5e-10	-0.00818517	0.00129175	40.1509	2.4e-10	11_31355524_A_C	rs2761589
rs972714	11	31358875	0	T	G	0.358719	0.994484	38.1945	6.4e-10	-0.00818394	0.00129206	40.1198	2.4e-10	11_31358875_T_G	rs2761589
rs7940020	11	31366453	0	T	G	0.358717	0.994495	38.2118	6.3e-10	-0.00818568	0.00129207	40.1366	2.4e-10	11_31366453_T_G	rs2761589
rs1535741	11	31375072	0	T	C	0.3589	0.99433	38.18	6.5e-10	-0.00818346	0.00129195	40.1222	2.4e-10	11_31375072_T_C	rs2761589
rs40465	5	103981726	0	T	G	0.668425	0.990193	34.538	4.2e-09	-0.00832914	0.00131672	40.0144	2.5e-10	5_103981726_T_G	rs40465
rs35033793	5	148028379	0	G	A	0.761307	0.989917	42.9366	5.7e-11	0.00922546	0.00145757	40.0604	2.5e-10	5_148028379_G_A	rs13163314
rs62389022	5	148028640	0	C	T	0.761297	0.989916	42.9355	5.7e-11	0.00922489	0.00145755	40.0565	2.5e-10	5_148028640_C_T	rs13163314
rs10822186	10	65350383	0	A	G	0.506896	0.995604	42.1235	8.6e-11	0.00783938	0.00123913	40.0251	2.5e-10	10_65350383_A_G	rs7924036
rs273587	11	30883876	0	A	T	0.319574	0.988072	42.8627	5.9e-11	-0.00842005	0.00133119	40.0082	2.5e-10	11_30883876_A_T	rs2761589
rs34547173	5	148028136	0	C	A	0.761289	0.989891	42.7956	6.1e-11	0.00920985	0.00145757	39.925	2.6e-10	5_148028136_C_A	rs13163314
rs2478881	6	51184712	0	C	T	0.654319	0.991376	40.6292	1.8e-10	0.0082563	0.00130595	39.9682	2.6e-10	6_51184712_C_T	rs2504671
rs9349582	6	51316546	0	T	C	0.689305	0.9938	40.704	1.8e-10	0.00847023	0.00133943	39.9898	2.6e-10	6_51316546_T_C	rs2504671
rs9367432	6	51317602	0	A	G	0.68929	0.993726	40.5716	1.9e-10	0.00846417	0.00133945	39.9312	2.6e-10	6_51317602_A_G	rs2504671
rs10761787	10	65353755	0	A	T	0.50693	0.993989	41.8885	9.7e-11	0.0078375	0.0012399	39.9561	2.6e-10	10_65353755_A_T	rs7924036
rs2937336	13	55998648	0	G	A	0.268399	0.993426	37.987	7.1e-10	-0.00882926	0.00139658	39.9686	2.6e-10	13_55998648_G_A	rs9537160
rs72690737	14	79930644	0	T	C	0.778903	0.994231	42.559	6.9e-11	-0.00943634	0.00149286	39.9547	2.6e-10	14_79930644_T_C	rs10136360
rs9474033	6	51492046	0	T	G	0.732823	0.993568	44.1087	3.1e-11	0.0088577	0.00140235	39.8959	2.7e-10	6_51492046_T_G	rs2504671
rs1338549	6	98312143	0	T	G	0.46652	0.993428	41.9805	9.2e-11	-0.00784897	0.00124295	39.8768	2.7e-10	6_98312143_T_G	rs9387963
rs11012726	10	21797272	0	T	C	0.692565	0.981026	33.034	9.1e-09	-0.00853676	0.00135155	39.8953	2.7e-10	10_21797272_T_C	rs7072776
rs4922859	11	31382517	0	A	G	0.359053	0.994615	37.9053	7.4e-10	-0.00815563	0.00129161	39.8704	2.7e-10	11_31382517_A_G	rs2761589
rs3013315	13	55998607	0	T	C	0.26857	0.99387	37.9596	7.2e-10	-0.00881306	0.00139599	39.8555	2.7e-10	13_55998607_T_C	rs9537160
rs144002017	19	41335269	0	T	G	0.977848	0.996134	38.1582	6.5e-10	-0.0265829	0.00420764	39.9142	2.7e-10	19_41335269_T_G	rs117287096
rs9918312	6	51501218	0	G	A	0.732783	0.99363	43.9937	3.3e-11	0.00884457	0.00140228	39.7815	2.8e-10	6_51501218_G_A	rs2504671
rs816379	6	53999025	0	A	C	0.631678	0.998547	43.8205	3.6e-11	-0.00808476	0.00128124	39.8174	2.8e-10	6_53999025_A_C	rs816366
rs9638181	7	72999043	0	A	G	0.716299	0.999147	39.6529	3e-10	0.00864801	0.00137084	39.7976	2.8e-10	7_72999043_A_G	rs33951980
rs7895549	10	65357438	0	G	A	0.506765	0.992787	41.8351	9.9e-11	0.00782804	0.00124049	39.8217	2.8e-10	10_65357438_G_A	rs7924036
rs942272	11	31364368	0	C	T	0.35886	0.994433	37.8892	7.5e-10	-0.00814984	0.00129191	39.7957	2.8e-10	11_31364368_C_T	rs2761589
rs16922084	11	31371109	0	C	T	0.358824	0.994369	37.9494	7.3e-10	-0.00815439	0.00129201	39.8334	2.8e-10	11_31371109_C_T	rs2761589
rs6484501	11	31373100	0	G	T	0.358825	0.994375	37.9423	7.3e-10	-0.00815357	0.00129201	39.8257	2.8e-10	11_31373100_G_T	rs2761589
rs17836088	14	79932041	0	G	C	0.778929	0.99456	42.4531	7.2e-11	-0.00942233	0.00149272	39.8436	2.8e-10	14_79932041_G_C	rs10136360
rs66506038	7	72995943	0	T	C	0.716309	0.999252	39.5961	3.1e-10	0.0086412	0.00137083	39.7355	2.9e-10	7_72995943_T_C	rs33951980
rs672396	11	31386165	0	A	G	0.358736	0.994444	37.7664	8e-10	-0.00814533	0.00129201	39.7453	2.9e-10	11_31386165_A_G	rs2761589
rs9971609	11	31434104	0	C	T	0.359431	0.992414	37.7119	8.2e-10	-0.00814999	0.00129283	39.7403	2.9e-10	11_31434104_C_T	rs2761589
rs7988345	13	99117685	0	A	G	0.710063	0.997345	42.8763	5.8e-11	0.00859339	0.00136279	39.7625	2.9e-10	13_99117685_A_G	rs7334078
rs6565174	16	30111904	0	A	C	0.115861	1	41.1847	1.4e-10	-0.0121624	0.00192883	39.7602	2.9e-10	16_30111904_A_C	rs4788415
rs8061772	16	30119525	0	C	A	0.142408	1	43.915	3.4e-11	-0.0111308	0.00176638	39.7083	2.9e-10	16_30119525_C_A	rs4788415
rs1516187	2	51930164	0	T	C	0.131756	0.989505	47.5957	5.2e-12	-0.0115549	0.00183414	39.6888	3e-10	2_51930164_T_C	rs1516187
rs2441380	2	61775364	0	T	C	0.395623	0.999178	41.5731	1.1e-10	-0.00795894	0.00126312	39.7031	3e-10	2_61775364_T_C	rs1562308
rs7793710	7	72971531	0	C	G	0.717926	0.997804	40.2335	2.3e-10	0.00865403	0.00137415	39.6616	3e-10	7_72971531_C_G	rs33951980
rs61936677	12	78755603	0	G	A	0.889	0.972664	47.4144	5.7e-12	0.0125668	0.00199437	39.7045	3e-10	12_78755603_G_A	rs12581220
rs2427884	2	61775369	0	G	A	0.395916	0.999521	41.465	1.2e-10	-0.00795037	0.00126283	39.6352	3.1e-10	2_61775369_G_A	rs1562308
rs6767671	3	25106760	0	G	T	0.43656	0.986351	32.5942	1.1e-08	-0.00788291	0.00125237	39.6195	3.1e-10	3_25106760_G_T	rs7619139
rs4712056	6	53989526	0	G	A	0.366209	1	44.559	2.5e-11	0.00806957	0.00128217	39.6102	3.1e-10	6_53989526_G_A	rs816366
rs67644909	7	72995954	0	C	T	0.716329	0.999209	39.4719	3.3e-10	0.00863118	0.00137088	39.6405	3.1e-10	7_72995954_C_T	rs33951980
rs2666769	10	22150150	0	C	A	0.290215	0.99492	40.8982	1.6e-10	0.00858953	0.00136441	39.6322	3.1e-10	10_22150150_C_A	rs7072776
rs10822184	10	65337153	0	T	C	0.506846	1	41.8503	9.9e-11	0.00778648	0.00123678	39.6367	3.1e-10	10_65337153_T_C	rs7924036
rs674035	11	31399014	0	G	A	0.358798	0.995456	37.6517	8.5e-10	-0.00812805	0.00129134	39.618	3.1e-10	11_31399014_G_A	rs2761589
rs2937338	13	55999207	0	A	G	0.264759	0.996074	37.7611	8e-10	-0.00882161	0.0014012	39.6363	3.1e-10	13_55999207_A_G	rs9537160
rs17574378	13	99116384	0	T	C	0.710345	0.997313	42.5798	6.8e-11	0.00857681	0.00136307	39.5925	3.1e-10	13_99116384_T_C	rs7334078
rs7429279	3	25118637	0	A	C	0.410705	0.992667	34.3253	4.7e-09	-0.00792286	0.00125958	39.565	3.2e-10	3_25118637_A_C	rs7619139
rs13225347	7	72976048	0	C	T	0.718058	0.998251	40.0636	2.5e-10	0.00863997	0.0013741	39.5357	3.2e-10	7_72976048_C_T	rs33951980
rs61373376	19	46183586	0	C	T	0.845942	0.997683	47.1263	6.7e-12	0.0107631	0.00171151	39.5474	3.2e-10	19_46183586_C_T	rs34783010
rs34484204	2	61774854	0	A	G	0.395925	0.999549	41.345	1.3e-10	-0.00793701	0.00126284	39.5018	3.3e-10	2_61774854_A_G	rs1562308
rs2286276	7	72987354	0	C	T	0.716543	1	39.2382	3.8e-10	0.00861288	0.00137071	39.4827	3.3e-10	7_72987354_C_T	rs33951980
rs34452566	11	27793470	0	G	T	0.801102	1	40.5908	1.9e-10	-0.00972968	0.00154781	39.5151	3.3e-10	11_27793470_G_T	rs34452566
rs7940420	11	31366700	0	T	A	0.359138	0.994163	37.5443	8.9e-10	-0.00811709	0.00129184	39.4804	3.3e-10	11_31366700_T_A	rs2761589
rs2421207	2	61769405	0	T	A	0.386738	0.99894	39.7519	2.9e-10	-0.0079615	0.00126832	39.403	3.4e-10	2_61769405_T_A	rs1562308
rs71582305	5	148034040	0	C	G	0.759828	0.986854	42.5579	6.9e-11	0.00915083	0.00145676	39.4586	3.4e-10	5_148034040_C_G	rs13163314
rs12539351	7	72978112	0	A	G	0.718025	0.998362	40.0084	2.5e-10	0.00862522	0.00137401	39.4059	3.4e-10	7_72978112_A_G	rs33951980
rs507969	11	30830612	0	C	A	0.324966	0.985081	41.7763	1e-10	-0.00833491	0.0013273	39.4331	3.4e-10	11_30830612_C_A	rs2761589
rs13225333	7	72976018	0	C	T	0.718015	0.998303	39.9482	2.6e-10	0.00862452	0.001374	39.3998	3.5e-10	7_72976018_C_T	rs33951980
rs6946689	7	72977637	0	T	A	0.718007	0.998349	39.9336	2.6e-10	0.00861909	0.00137396	39.3526	3.5e-10	7_72977637_T_A	rs33951980
rs13247874	7	73010442	0	C	T	0.802605	0.997449	37.2484	1e-09	0.00975425	0.00155422	39.3878	3.5e-10	7_73010442_C_T	rs33951980
rs10761786	10	65336207	0	T	C	0.506799	0.999904	41.5648	1.1e-10	0.00776233	0.00123682	39.3884	3.5e-10	10_65336207_T_C	rs7924036
rs3105071	13	55990537	0	T	C	0.267329	0.996608	37.3449	9.9e-10	-0.00875689	0.00139596	39.3506	3.5e-10	13_55990537_T_C	rs9537160
rs3105070	13	55990585	0	T	C	0.267386	0.996834	37.3705	9.8e-10	-0.00875755	0.00139573	39.37	3.5e-10	13_55990585_T_C	rs9537160
rs9527379	13	55994072	0	T	C	0.26733	0.996617	37.3417	9.9e-10	-0.00875658	0.00139595	39.3483	3.5e-10	13_55994072_T_C	rs9537160
rs3105061	13	55994517	0	T	C	0.267329	0.996618	37.3497	9.9e-10	-0.00875769	0.00139596	39.358	3.5e-10	13_55994517_T_C	rs9537160
rs3105060	13	55994782	0	G	T	0.267384	0.996339	37.3417	9.9e-10	-0.00875722	0.00139607	39.3475	3.5e-10	13_55994782_G_T	rs9537160
rs9527380	13	55994990	0	A	T	0.26733	0.996619	37.3398	9.9e-10	-0.0087563	0.00139595	39.346	3.5e-10	13_55994990_A_T	rs9537160
rs3124409	13	55996309	0	C	T	0.26733	0.996619	37.34	9.9e-10	-0.00875632	0.00139595	39.3461	3.5e-10	13_55996309_C_T	rs9537160
rs3105094	13	55996779	0	T	C	0.267326	0.996604	37.3658	9.8e-10	-0.00875999	0.00139596	39.3785	3.5e-10	13_55996779_T_C	rs9537160
rs7985565	13	99113471	0	G	C	0.710461	0.996672	42.488	7.1e-11	0.00855509	0.00136372	39.3551	3.5e-10	13_99113471_G_C	rs7334078
rs13244614	7	72973854	0	C	A	0.717347	0.997542	39.9209	2.6e-10	0.00861419	0.00137335	39.3428	3.6e-10	7_72973854_C_A	rs33951980
rs12539316	7	72977898	0	A	G	0.718023	0.99835	39.9039	2.7e-10	0.00861495	0.00137402	39.3117	3.6e-10	7_72977898_A_G	rs33951980
rs2022130	11	30819811	0	T	C	0.675143	0.984842	41.7026	1.1e-10	0.00832482	0.00132752	39.3252	3.6e-10	11_30819811_T_C	rs2761589
rs3124432	13	55990670	0	A	T	0.267383	0.99634	37.332	1e-09	-0.00875635	0.00139607	39.3397	3.6e-10	13_55990670_A_T	rs9537160
rs3105069	13	55990786	0	A	G	0.267382	0.996343	37.3321	1e-09	-0.00875631	0.00139607	39.3392	3.6e-10	13_55990786_A_G	rs9537160
rs3124431	13	55990963	0	A	T	0.267382	0.996342	37.3307	1e-09	-0.00875616	0.00139607	39.338	3.6e-10	13_55990963_A_T	rs9537160
rs3105068	13	55991573	0	A	G	0.267382	0.996343	37.2996	1e-09	-0.00875297	0.00139607	39.3093	3.6e-10	13_55991573_A_G	rs9537160
rs3105067	13	55991644	0	T	C	0.267383	0.996342	37.3301	1e-09	-0.00875605	0.00139607	39.337	3.6e-10	13_55991644_T_C	rs9537160
rs2315876	13	55992778	0	T	A	0.267329	0.99662	37.298	1e-09	-0.00875167	0.00139595	39.3044	3.6e-10	13_55992778_T_A	rs9537160
rs9527378	13	55993840	0	C	T	0.267382	0.996342	37.3307	1e-09	-0.00875608	0.00139607	39.3372	3.6e-10	13_55993840_C_T	rs9537160
rs3105062	13	55994405	0	A	T	0.267382	0.996344	37.3324	1e-09	-0.00875616	0.00139607	39.338	3.6e-10	13_55994405_A_T	rs9537160
rs3105089	13	55995676	0	T	C	0.267382	0.996344	37.3304	1e-09	-0.00875596	0.00139607	39.3362	3.6e-10	13_55995676_T_C	rs9537160
rs3105091	13	55996221	0	T	A	0.267382	0.996345	37.3302	1e-09	-0.00875593	0.00139607	39.336	3.6e-10	13_55996221_T_A	rs9537160
rs3105092	13	55996245	0	A	G	0.267382	0.996344	37.3304	1e-09	-0.00875596	0.00139607	39.3362	3.6e-10	13_55996245_A_G	rs9537160
rs3105093	13	55996489	0	A	G	0.267254	0.996256	37.3228	1e-09	-0.00875684	0.00139634	39.3291	3.6e-10	13_55996489_A_G	rs9537160
rs3105095	13	55996936	0	A	G	0.267383	0.996344	37.3294	1e-09	-0.00875577	0.00139607	39.3345	3.6e-10	13_55996936_A_G	rs9537160
rs745638	13	99119307	0	C	G	0.710479	0.998402	42.4087	7.4e-11	0.00854691	0.00136279	39.3335	3.6e-10	13_99119307_C_G	rs7334078
rs13163982	5	148026299	0	C	T	0.760991	0.988411	42.1229	8.6e-11	0.00913668	0.00145777	39.2824	3.7e-10	5_148026299_C_T	rs13163314
rs10948798	6	53973770	0	C	T	0.648627	0.995907	44.6109	2.4e-11	-0.00812474	0.00129667	39.2608	3.7e-10	6_53973770_C_T	rs816366
rs816364	6	53990465	0	G	A	0.36654	0.999422	44.1674	3e-11	0.00803302	0.00128207	39.2586	3.7e-10	6_53990465_G_A	rs816366
rs816365	6	53991896	0	G	T	0.366534	0.998997	44.135	3.1e-11	0.00803553	0.00128236	39.2655	3.7e-10	6_53991896_G_T	rs816366
rs14415	7	72984780	0	T	C	0.71653	0.999567	39.0186	4.2e-10	0.0085919	0.00137087	39.2811	3.7e-10	7_72984780_T_C	rs33951980
rs10506785	12	78790801	0	G	C	0.575534	0.994312	43.0798	5.3e-11	0.00785807	0.00125385	39.2773	3.7e-10	12_78790801_G_C	rs12581220
rs4294654	13	99119607	0	G	A	0.710614	0.998834	42.3292	7.7e-11	0.00853624	0.00136269	39.2407	3.7e-10	13_99119607_G_A	rs7334078
rs11646118	16	29926471	0	T	C	0.912927	0.990959	44.6188	2.4e-11	0.013771	0.00219753	39.2701	3.7e-10	16_29926471_T_C	rs11646118
rs73931391	19	41407874	0	A	G	0.977655	0.988409	39.1166	4e-10	-0.0263769	0.00420816	39.2883	3.7e-10	19_41407874_A_G	rs117287096
rs2465037	6	51179260	0	C	A	0.656882	0.990307	39.796	2.8e-10	0.0081955	0.00130897	39.2003	3.8e-10	6_51179260_C_A	rs2504671
rs10807783	7	17313726	0	T	G	0.342699	0.992274	37.8174	7.8e-10	0.00817903	0.00130652	39.1898	3.8e-10	7_17313726_T_G	rs4410790
rs12056034	7	72878645	0	A	G	0.875414	1	37.7611	8e-10	0.011718	0.00187075	39.2349	3.8e-10	7_72878645_A_G	rs33951980
rs7084569	10	64876554	0	G	A	0.527869	0.991328	45.4557	1.6e-11	0.00779501	0.00124446	39.2348	3.8e-10	10_64876554_G_A	rs7924036
rs7090758	10	65335315	0	T	C	0.525755	0.99902	39.5941	3.1e-10	-0.0077555	0.00123885	39.1908	3.8e-10	10_65335315_T_C	rs7924036
rs4439488	11	30804996	0	G	C	0.675122	0.976438	41.5072	1.2e-10	0.00834413	0.00133257	39.2087	3.8e-10	11_30804996_G_C	rs2021807
rs3803253	13	99117149	0	G	A	0.710464	0.997773	42.3005	7.8e-11	0.00853596	0.00136322	39.208	3.8e-10	13_99117149_G_A	rs7334078
rs9584854	13	99118590	0	C	T	0.710574	0.998251	42.2928	7.9e-11	0.00853397	0.00136301	39.2016	3.8e-10	13_99118590_C_T	rs7334078
rs12869627	13	99120452	0	G	A	0.710619	0.999286	42.3006	7.8e-11	0.00853196	0.00136249	39.2131	3.8e-10	13_99120452_G_A	rs7334078
rs7200298	16	53830198	0	G	T	0.337557	0.995898	43.6368	4e-11	-0.00819325	0.00130858	39.2023	3.8e-10	16_53830198_G_T	rs11642015
rs1562309	2	61770126	0	C	A	0.386862	0.999106	39.6015	3.1e-10	-0.00793378	0.00126815	39.1397	3.9e-10	2_61770126_C_A	rs1562308
rs745639	13	99119279	0	G	A	0.710533	0.998516	42.2222	8.1e-11	0.00852941	0.00136272	39.1763	3.9e-10	13_99119279_G_A	rs7334078
rs6491427	13	99113166	0	A	G	0.710607	0.99685	42.2891	7.9e-11	0.00852831	0.00136376	39.1064	4e-10	13_99113166_A_G	rs7334078
rs7139583	13	99113230	0	A	C	0.710744	0.996796	42.3478	7.6e-11	0.00853155	0.00136404	39.1202	4e-10	13_99113230_A_C	rs7334078
rs7339274	13	99120272	0	C	T	0.710514	1	42.0897	8.7e-11	0.0085173	0.00136219	39.0959	4e-10	13_99120272_C_T	rs7334078
rs12256551	10	21799726	0	A	C	0.645076	0.987144	35.4863	2.6e-09	-0.00812215	0.00129921	39.0827	4.1e-10	10_21799726_A_C	rs7072776
rs10822143	10	64887856	0	C	T	0.495732	0.997339	45.2298	1.8e-11	0.00773921	0.00123839	39.0553	4.1e-10	10_64887856_C_T	rs7924036
rs927224	11	30810665	0	T	C	0.675633	0.981847	41.5905	1.1e-10	0.00831121	0.00132956	39.0761	4.1e-10	11_30810665_T_C	rs2021807
rs9584855	13	99119000	0	T	G	0.710596	0.998196	42.0949	8.7e-11	0.00852027	0.00136298	39.0774	4.1e-10	13_99119000_T_G	rs7334078
rs1514758	2	166332166	0	C	T	0.762879	0.998684	42.9538	5.6e-11	0.00906847	0.00145153	39.0313	4.2e-10	2_166332166_C_T	rs16850592
rs2145754	6	53986503	0	A	T	0.366455	0.99901	43.8434	3.6e-11	0.00800992	0.00128244	39.0105	4.2e-10	6_53986503_A_T	rs816366
rs10995445	10	64874754	0	A	T	0.527767	0.989459	45.1613	1.8e-11	0.00777582	0.00124543	38.9812	4.3e-10	10_64874754_A_T	rs7924036
rs485265	11	31407788	0	G	A	0.359165	0.99557	36.9584	1.2e-09	-0.00805669	0.00129094	38.9495	4.3e-10	11_31407788_G_A	rs2761589
rs11129657	3	35636709	0	T	C	0.789491	0.989043	34.5477	4.2e-09	-0.00949686	0.00152256	38.9056	4.4e-10	3_35636709_T_C	rs1513481
rs3903931	6	53990311	0	A	G	0.633962	0.999837	43.7269	3.8e-11	-0.0079994	0.00128232	38.9152	4.4e-10	6_53990311_A_G	rs816366
rs10457441	6	98572120	0	T	C	0.484428	0.999827	43.6645	3.9e-11	0.00773175	0.00123954	38.9079	4.4e-10	6_98572120_T_C	rs9387963
rs2393831	10	63466754	0	A	G	0.777106	0.997043	36.5699	1.5e-09	0.00928993	0.00148858	38.9473	4.4e-10	10_63466754_A_G	rs2393831
rs578666	11	31404484	0	G	A	0.35917	0.995524	36.9208	1.2e-09	-0.00805503	0.00129095	38.9327	4.4e-10	11_31404484_G_A	rs2761589
rs7982441	13	55924013	0	T	C	0.267854	0.999158	36.6795	1.4e-09	-0.008696	0.00139374	38.9292	4.4e-10	13_55924013_T_C	rs9537160
rs600522	6	53992259	0	T	C	0.633985	0.999545	43.6857	3.9e-11	-0.00799823	0.00128251	38.8924	4.5e-10	6_53992259_T_C	rs816366
rs56383788	7	73016400	0	A	G	0.79916	0.995011	35.6208	2.4e-09	0.00963629	0.0015456	38.871	4.5e-10	7_73016400_A_G	rs33951980
rs7911761	10	65338753	0	C	G	0.526498	0.997699	39.3333	3.6e-10	-0.00773014	0.00123972	38.8802	4.5e-10	10_65338753_C_G	rs7924036
rs7930532	11	30811294	0	G	A	0.675389	0.982104	41.3148	1.3e-10	0.00828817	0.00132909	38.8872	4.5e-10	11_30811294_G_A	rs2021807
rs796341	11	31414151	0	G	A	0.35916	0.995606	36.8903	1.2e-09	-0.00804912	0.00129093	38.8768	4.5e-10	11_31414151_G_A	rs2761589
rs9381964	6	51302590	0	A	C	0.68704	0.993844	39.7221	2.9e-10	0.00833072	0.00133681	38.8354	4.6e-10	6_51302590_A_C	rs2504671
rs521584	6	53988852	0	A	C	0.633938	0.999673	43.6592	3.9e-11	-0.00799165	0.00128241	38.8349	4.6e-10	6_53988852_A_C	rs816366
rs7077256	10	65336185	0	A	G	0.526225	0.999284	39.2429	3.7e-10	-0.00771915	0.00123868	38.8348	4.6e-10	10_65336185_A_G	rs7924036
rs7902616	10	65336373	0	G	A	0.526261	0.999151	39.2463	3.7e-10	-0.00772009	0.00123876	38.839	4.6e-10	10_65336373_G_A	rs7924036
rs10822183	10	65337141	0	T	C	0.526226	0.999302	39.2335	3.8e-10	-0.00771836	0.00123867	38.8273	4.6e-10	10_65337141_T_C	rs7924036
rs9367431	6	51304675	0	T	C	0.687058	0.993827	39.6856	3e-10	0.00832732	0.00133684	38.8017	4.7e-10	6_51304675_T_C	rs2504671
rs1280946	6	53985339	0	T	C	0.366844	0.998757	43.7354	3.8e-11	0.00798593	0.00128216	38.7942	4.7e-10	6_53985339_T_C	rs816366
rs557224	6	53987272	0	A	G	0.633946	0.999284	43.6875	3.9e-11	-0.00799015	0.00128261	38.8078	4.7e-10	6_53987272_A_G	rs816366
rs666104	6	53987279	0	C	G	0.633946	0.999284	43.6875	3.9e-11	-0.00799015	0.00128261	38.8078	4.7e-10	6_53987279_C_G	rs816366
rs524332	6	53988535	0	A	G	0.633926	0.999517	43.6247	4e-11	-0.00798686	0.00128248	38.784	4.7e-10	6_53988535_A_G	rs816366
rs634042	6	53988640	0	T	C	0.633936	0.999535	43.611	4e-11	-0.00798662	0.00128247	38.782	4.7e-10	6_53988640_T_C	rs816366
rs13208578	6	98572976	0	C	T	0.484407	1	43.5017	4.2e-11	0.00771981	0.00123951	38.7896	4.7e-10	6_98572976_C_T	rs9387963
rs1872841	6	98576688	0	C	A	0.48443	0.999587	43.5483	4.1e-11	0.00772184	0.00123972	38.7967	4.7e-10	6_98576688_C_A	rs9387963
rs9401634	6	98578511	0	T	C	0.484429	0.999562	43.5456	4.1e-11	0.0077219	0.00123968	38.7995	4.7e-10	6_98578511_T_C	rs9387963
rs2666775	10	22240299	0	C	T	0.29088	0.994287	41.1981	1.4e-10	0.00848961	0.00136308	38.7909	4.7e-10	10_22240299_C_T	rs7072776
rs6479908	10	65333648	0	C	G	0.52627	0.998822	39.2175	3.8e-10	-0.0077167	0.00123897	38.7918	4.7e-10	10_65333648_C_G	rs7924036
rs7910951	10	65338304	0	A	G	0.526536	0.997655	39.2613	3.7e-10	-0.00772287	0.00123975	38.8049	4.7e-10	10_65338304_A_G	rs7924036
rs3124402	13	55975115	0	A	G	0.266754	0.999072	36.481	1.5e-09	-0.00869052	0.00139535	38.7902	4.7e-10	13_55975115_A_G	rs9537160
rs8020365	14	79937216	0	T	A	0.779154	0.992168	41.1347	1.4e-10	-0.00931563	0.00149576	38.7885	4.7e-10	14_79937216_T_A	rs10136360
rs55807911	2	28421473	0	T	C	0.801572	0.902826	35.5185	2.5e-09	-0.0101316	0.00162751	38.7534	4.8e-10	2_28421473_T_C	rs55807911
rs778758	2	61782161	0	T	C	0.395783	0.999121	40.7344	1.7e-10	-0.00786351	0.0012631	38.7578	4.8e-10	2_61782161_T_C	rs1562308
rs581120	6	53986928	0	T	C	0.633931	0.999287	43.6053	4e-11	-0.00798384	0.00128261	38.7469	4.8e-10	6_53986928_T_C	rs816366
rs665640	6	53987382	0	T	A	0.63393	0.99931	43.6058	4e-11	-0.0079842	0.00128259	38.7512	4.8e-10	6_53987382_T_A	rs816366
rs1280949	6	53984899	0	C	T	0.366894	0.998672	43.6553	3.9e-11	0.00797683	0.00128218	38.7044	4.9e-10	6_53984899_C_T	rs816366
rs667854	6	53986877	0	A	G	0.633931	0.999287	43.5677	4.1e-11	-0.00798021	0.00128261	38.7115	4.9e-10	6_53986877_A_G	rs816366
rs12768534	10	65340897	0	G	A	0.526299	0.998944	39.0549	4.1e-10	-0.00770856	0.00123887	38.7162	4.9e-10	10_65340897_G_A	rs7924036
rs10490869	3	35635145	0	A	T	0.790099	0.989407	34.2453	4.9e-09	-0.00948095	0.00152429	38.6873	5e-10	3_35635145_A_T	rs1513481
rs12207540	6	51495626	0	C	T	0.768751	0.993547	45.7763	1.3e-11	0.00914986	0.00147147	38.6658	5e-10	6_51495626_C_T	rs2504671
rs963778	14	27009199	0	A	C	0.747596	0.986767	35.8759	2.1e-09	0.00889259	0.00142972	38.6862	5e-10	14_27009199_A_C	rs7140993
rs778752	2	61776902	0	C	G	0.386673	0.998718	39.1646	3.9e-10	-0.00788694	0.00126851	38.6573	5.1e-10	2_61776902_C_G	rs1562308
rs10510554	3	25099776	0	T	C	0.430668	0.990438	32.9272	9.6e-09	-0.00778398	0.00125201	38.6535	5.1e-10	3_25099776_T_C	rs7619139
rs9370028	6	51310615	0	G	A	0.686921	0.992729	39.4888	3.3e-10	0.00831352	0.00133739	38.6416	5.1e-10	6_51310615_G_A	rs2504671
rs1407239	6	53960803	0	G	A	0.381913	0.964209	45.0856	1.9e-11	0.00804399	0.00129399	38.6437	5.1e-10	6_53960803_G_A	rs816366
rs9401593	6	98549801	0	A	C	0.515064	0.993669	40.1955	2.3e-10	0.00772394	0.0012428	38.6257	5.1e-10	6_98549801_A_C	rs9387963
rs35194615	11	30813303	0	C	T	0.675189	0.982547	40.9809	1.5e-10	0.00826083	0.00132888	38.6436	5.1e-10	11_30813303_C_T	rs2761589
rs778763	2	61785639	0	C	G	0.395962	0.998955	40.4894	2e-10	-0.00784838	0.00126302	38.6133	5.2e-10	2_61785639_C_G	rs1562308
rs1609783	3	25095911	0	G	A	0.47423	0.98461	30.0108	4.3e-08	-0.00773738	0.00124522	38.61	5.2e-10	3_25095911_G_A	rs7619139
rs9375225	6	98588754	0	G	T	0.484399	0.998987	43.351	4.6e-11	0.00770479	0.00123997	38.6102	5.2e-10	6_98588754_G_T	rs9387963
rs9732777	10	21771350	0	T	C	0.641584	0.993809	37.9557	7.2e-10	-0.00802961	0.0012924	38.6005	5.2e-10	10_21771350_T_C	rs7072776
rs12770228	10	21783634	0	G	A	0.683944	0.997405	33.4018	7.5e-09	-0.00826587	0.00133053	38.595	5.2e-10	10_21783634_G_A	rs7072776
rs1550150	13	55839864	0	T	G	0.285574	0.978422	36.7658	1.3e-09	-0.00858331	0.00138174	38.5882	5.2e-10	13_55839864_T_G	rs9537160
rs11887205	2	61774473	0	T	G	0.38639	0.998938	39.0239	4.2e-10	-0.00787604	0.00126856	38.5473	5.3e-10	2_61774473_T_G	rs1562308
rs10807424	6	51365011	0	C	T	0.616026	0.996437	39.18	3.9e-10	0.00791377	0.00127421	38.5734	5.3e-10	6_51365011_C_T	rs2504671
rs1487441	6	98553894	0	G	A	0.515499	0.995394	40.0876	2.4e-10	0.00771149	0.00124185	38.5604	5.3e-10	6_98553894_G_A	rs9387963
rs17714935	11	31689453	0	G	A	0.537984	1	38.6473	5.1e-10	0.00770011	0.00124012	38.5538	5.3e-10	11_31689453_G_A	rs2761589
rs12864723	13	56014625	0	A	G	0.725672	0.997388	37.9855	7.1e-10	0.00859681	0.00138468	38.5454	5.3e-10	13_56014625_A_G	rs9537160
rs9630321	13	99106979	0	C	G	0.707516	0.99871	42.2712	7.9e-11	0.00843664	0.00135827	38.5801	5.3e-10	13_99106979_C_G	rs7334078
rs1906252	6	98550289	0	C	A	0.515389	0.994483	40.0861	2.4e-10	0.0077106	0.00124239	38.518	5.4e-10	6_98550289_C_A	rs9387963
rs12204181	6	98579481	0	T	C	0.48394	0.998527	43.1491	5.1e-11	0.00769794	0.00124014	38.531	5.4e-10	6_98579481_T_C	rs9387963
rs12148513	15	75222225	0	C	T	0.621046	0.980049	36.9592	1.2e-09	0.00797571	0.00128523	38.5104	5.4e-10	15_75222225_C_T	rs2472297
rs4667820	2	166311984	0	T	C	0.763739	0.998487	42.6113	6.7e-11	0.00901668	0.00145344	38.4859	5.5e-10	2_166311984_T_C	rs16850592
rs10948638	6	51494890	0	T	G	0.768624	0.993369	45.5201	1.5e-11	0.00912879	0.00147131	38.4963	5.5e-10	6_51494890_T_G	rs2504671
rs1051921	7	73007943	0	G	A	0.802997	1	36.1563	1.8e-09	0.00963638	0.00155335	38.4846	5.5e-10	7_73007943_G_A	rs33951980
rs692816	13	55923592	0	G	A	0.267259	0.999448	36.2348	1.7e-09	-0.00865173	0.00139434	38.5005	5.5e-10	13_55923592_G_A	rs9537160
rs10930169	2	166355411	0	A	G	0.763802	1	42.5443	6.9e-11	0.00901899	0.00145423	38.4637	5.6e-10	2_166355411_A_G	rs16850592
rs11012732	10	21830104	0	A	G	0.66859	0.996658	34.0857	5.3e-09	-0.00815437	0.00131468	38.4719	5.6e-10	10_21830104_A_G	rs7072776
rs11031434	11	31653212	0	G	A	0.53962	0.998553	38.6485	5.1e-10	0.00769368	0.00124075	38.4505	5.6e-10	11_31653212_G_A	rs2761589
rs1414506	6	51487416	0	C	T	0.348244	0.995324	39.2122	3.8e-10	-0.00806989	0.00130191	38.4213	5.7e-10	6_51487416_C_T	rs2504671
rs1407231	6	54009376	0	T	C	0.639376	0.99888	42.3428	7.7e-11	-0.0079763	0.00128689	38.4164	5.7e-10	6_54009376_T_C	rs816366
rs113026	11	30846842	0	G	A	0.32573	0.987871	40.78	1.7e-10	-0.00820594	0.0013245	38.3845	5.8e-10	11_30846842_G_A	rs2761589
rs9537117	13	56018077	0	A	G	0.725775	0.99766	37.9297	7.3e-10	0.00858016	0.00138467	38.3972	5.8e-10	13_56018077_A_G	rs9537160
rs17109256	14	79939993	0	G	A	0.778436	0.996149	40.8921	1.6e-10	-0.00923527	0.00149043	38.3952	5.8e-10	14_79939993_G_A	rs10136360
rs112292570	19	41345586	0	A	T	0.977856	0.996544	36.6043	1.4e-09	-0.0260793	0.00420957	38.3811	5.8e-10	19_41345586_A_T	rs117287096
rs778756	2	61781994	0	A	G	0.419809	0.999718	38.4123	5.7e-10	-0.00775147	0.00125151	38.3619	5.9e-10	2_61781994_A_G	rs1562308
rs79672333	2	166315656	0	G	T	0.76353	0.998976	42.4237	7.3e-11	0.00899772	0.00145263	38.3665	5.9e-10	2_166315656_G_T	rs16850592
rs6804842	3	25106437	0	A	G	0.426234	0.991473	32.8026	1e-08	-0.00776221	0.00125326	38.3607	5.9e-10	3_25106437_A_G	rs7619139
rs12186479	5	148095473	0	G	A	0.741871	0.997043	38.9718	4.3e-10	0.00875922	0.00141442	38.3507	5.9e-10	5_148095473_G_A	rs13163314
rs9375188	6	98555272	0	C	T	0.515522	0.995615	39.9028	2.7e-10	0.00769071	0.00124175	38.3585	5.9e-10	6_98555272_C_T	rs9387963
rs35866503	7	73005776	0	C	T	0.803016	0.999907	36.037	1.9e-09	0.00961906	0.00155339	38.3448	5.9e-10	7_73005776_C_T	rs33951980
rs13225660	7	73006388	0	C	T	0.803013	0.99988	36.0405	1.9e-09	0.00961984	0.00155338	38.3514	5.9e-10	7_73006388_C_T	rs33951980
rs535845	11	30839228	0	C	A	0.325495	0.987419	40.7934	1.7e-10	-0.00820954	0.00132535	38.3685	5.9e-10	11_30839228_C_A	rs2761589
rs532202	11	30839635	0	C	T	0.325598	0.987938	40.7169	1.8e-10	-0.00820537	0.00132485	38.3583	5.9e-10	11_30839635_C_T	rs2761589
rs7988959	13	99104004	0	T	C	0.706865	0.997686	42.1704	8.4e-11	0.00841054	0.00135807	38.3535	5.9e-10	13_99104004_T_C	rs7334078
rs778762	2	61782921	0	G	T	0.396159	0.999201	40.3183	2.2e-10	-0.00781712	0.00126275	38.3232	6e-10	2_61782921_G_T	rs1562308
rs2145759	6	54029152	0	G	C	0.359796	0.998407	42.1009	8.7e-11	0.007973	0.00128778	38.3321	6e-10	6_54029152_G_C	rs816366
rs13231516	7	72863249	0	T	G	0.876822	0.999786	36.5076	1.5e-09	0.0116249	0.00187812	38.3118	6e-10	7_72863249_T_G	rs33951980
rs2074755	7	72877166	0	T	C	0.876883	0.999589	36.5946	1.5e-09	0.0116302	0.00187863	38.3263	6e-10	7_72877166_T_C	rs33951980
rs1436698	13	55920686	0	C	T	0.26723	0.999571	36.0779	1.9e-09	-0.00863118	0.00139429	38.3208	6e-10	13_55920686_C_T	rs9537160
rs9584850	13	99101426	0	G	C	0.702113	0.994803	42.1689	8.4e-11	0.00837373	0.00135293	38.3078	6e-10	13_99101426_G_C	rs7334078
rs6743940	2	166341613	0	G	A	0.762755	0.999332	42.1089	8.6e-11	0.00897682	0.00145076	38.287	6.1e-10	2_166341613_G_A	rs16850592
rs2465043	6	51180765	0	G	A	0.64857	0.990446	38.7868	4.7e-10	0.00805256	0.00130126	38.2946	6.1e-10	6_51180765_G_A	rs2504671
rs9398662	6	98489561	0	T	C	0.562351	0.999403	42.2247	8.1e-11	0.00771471	0.00124692	38.2792	6.1e-10	6_98489561_T_C	rs9387963
rs1436697	13	55920814	0	G	C	0.26723	0.999534	36.0477	1.9e-09	-0.00862726	0.00139429	38.2857	6.1e-10	13_55920814_G_C	rs9537160
rs692930	13	55921984	0	T	C	0.26723	0.99952	36.0429	1.9e-09	-0.00862691	0.00139434	38.2802	6.1e-10	13_55921984_T_C	rs9537160
rs7982241	13	55923930	0	T	C	0.267239	0.999532	36.0406	1.9e-09	-0.00862695	0.00139431	38.2821	6.1e-10	13_55923930_T_C	rs9537160
rs3105056	13	55946152	0	T	C	0.267205	0.999392	35.9838	2e-09	-0.00862742	0.0013944	38.2815	6.1e-10	13_55946152_T_C	rs9537160
rs3124421	13	55946187	0	A	G	0.267221	0.999341	35.9738	2e-09	-0.00862698	0.00139442	38.2766	6.1e-10	13_55946187_A_G	rs9537160
rs3124420	13	55948201	0	G	T	0.267189	0.999328	36.0024	2e-09	-0.00862988	0.00139448	38.299	6.1e-10	13_55948201_G_T	rs9537160
rs3105085	13	55950495	0	T	C	0.267189	0.999327	36.0041	2e-09	-0.00863014	0.00139448	38.3013	6.1e-10	13_55950495_T_C	rs9537160
rs1407232	6	54016877	0	A	G	0.63943	0.99901	42.0917	8.7e-11	-0.00795788	0.00128683	38.2428	6.2e-10	6_54016877_A_G	rs816366
rs9375104	6	98487056	0	G	C	0.562361	0.999329	42.2025	8.2e-11	0.00771371	0.00124696	38.267	6.2e-10	6_98487056_G_C	rs9387963
rs12663336	6	98488641	0	C	A	0.562363	0.999332	42.1986	8.2e-11	0.00771315	0.00124696	38.2612	6.2e-10	6_98488641_C_A	rs9387963
rs1232202	11	31672198	0	T	C	0.537945	0.99978	38.3515	5.9e-10	0.00766507	0.00123944	38.2458	6.2e-10	11_31672198_T_C	rs2761589
rs1657202	13	55922607	0	C	G	0.267242	0.999511	36.0044	2e-09	-0.00862265	0.00139431	38.2437	6.2e-10	13_55922607_C_G	rs9537160
rs8002794	13	55923952	0	A	C	0.26724	0.999535	36.0289	1.9e-09	-0.0086253	0.0013943	38.268	6.2e-10	13_55923952_A_C	rs9537160
rs3105086	13	55950257	0	A	G	0.267204	0.999398	35.9549	2e-09	-0.00862372	0.0013944	38.2485	6.2e-10	13_55950257_A_G	rs9537160
rs9597179	13	56013880	0	A	G	0.725732	0.997598	37.7015	8.2e-10	0.00856447	0.00138471	38.2547	6.2e-10	13_56013880_A_G	rs9537160
rs1355996	2	166312614	0	G	T	0.763693	0.998214	42.2218	8.1e-11	0.00898671	0.00145341	38.2316	6.3e-10	2_166312614_G_T	rs16850592
rs9296739	6	54054837	0	A	G	0.357995	0.995104	42.2674	8e-11	0.00798561	0.00129161	38.2257	6.3e-10	6_54054837_A_G	rs816366
rs10764330	10	22286351	0	A	G	0.29872	0.993335	39.2445	3.7e-10	0.00837126	0.00135419	38.2141	6.3e-10	10_22286351_A_G	rs7072776
rs273582	11	30890857	0	C	T	0.329668	0.994873	39.9701	2.6e-10	-0.00813448	0.00131581	38.2186	6.3e-10	11_30890857_C_T	rs2761589
rs11601105	11	31650308	0	T	A	0.537787	0.999459	38.2571	6.2e-10	0.00766544	0.00123961	38.239	6.3e-10	11_31650308_T_A	rs2761589
rs1436700	13	55924547	0	G	A	0.267229	0.999612	35.9817	2e-09	-0.00861975	0.00139426	38.2208	6.3e-10	13_55924547_G_A	rs9537160
rs3105087	13	55948790	0	T	C	0.267241	0.999219	35.9261	2e-09	-0.00861991	0.00139447	38.2109	6.3e-10	13_55948790_T_C	rs9537160
rs9537114	13	56011428	0	A	G	0.725789	0.997151	37.7017	8.2e-10	0.00856348	0.00138502	38.2285	6.3e-10	13_56011428_A_G	rs9537160
rs17111366	14	27017537	0	A	G	0.756703	0.995947	36.0508	1.9e-09	0.00890903	0.00144109	38.2189	6.3e-10	14_27017537_A_G	rs7140993
rs3771258	2	61764140	0	C	T	0.386767	0.998158	38.6607	5e-10	-0.00784206	0.00126877	38.2026	6.4e-10	2_61764140_C_T	rs1562308
rs816373	6	54005043	0	A	G	0.639191	0.99881	42.071	8.8e-11	-0.00795103	0.00128675	38.182	6.4e-10	6_54005043_A_G	rs816366
rs34763247	7	72866616	0	A	T	0.876865	0.99986	36.3811	1.6e-09	0.01161	0.00187834	38.2046	6.4e-10	7_72866616_A_T	rs33951980
rs75229905	7	72895946	0	T	C	0.876849	0.999891	36.5133	1.5e-09	0.011607	0.00187811	38.1941	6.4e-10	7_72895946_T_C	rs33951980
rs2666778	10	22145687	0	C	T	0.297893	0.994478	39.2748	3.7e-10	0.00837013	0.00135422	38.2022	6.4e-10	10_22145687_C_T	rs7072776
rs558344	13	55917516	0	T	C	0.267175	0.999736	35.941	2e-09	-0.00861549	0.00139426	38.1831	6.4e-10	13_55917516_T_C	rs9537160
rs8002963	13	55924014	0	A	G	0.267275	0.99937	35.9635	2e-09	-0.00861819	0.00139436	38.2016	6.4e-10	13_55924014_A_G	rs9537160
rs2064939	14	27016744	0	T	C	0.756774	0.996126	36.0415	1.9e-09	0.00890682	0.00144109	38.2	6.4e-10	14_27016744_T_C	rs7140993
rs10150332	14	79936964	0	T	C	0.777855	0.99588	40.7584	1.7e-10	-0.00920631	0.00148948	38.2032	6.4e-10	14_79936964_T_C	rs10136360
rs79337536	2	166316258	0	T	C	0.763595	0.999166	42.2008	8.2e-11	0.00897421	0.00145266	38.1648	6.5e-10	2_166316258_T_C	rs16850592
rs2797425	6	54012352	0	G	C	0.639401	0.999164	41.9877	9.2e-11	-0.00794997	0.00128674	38.1721	6.5e-10	6_54012352_G_C	rs816366
rs2145755	6	54013765	0	A	G	0.639428	0.999105	42.0013	9.1e-11	-0.00794997	0.00128678	38.1699	6.5e-10	6_54013765_A_G	rs816366
rs639232	13	55914444	0	C	A	0.267191	0.999699	35.9039	2.1e-09	-0.00861248	0.00139426	38.1566	6.5e-10	13_55914444_C_A	rs9537160
rs636546	13	55915008	0	A	G	0.267181	0.999699	35.9076	2.1e-09	-0.00861198	0.00139428	38.1513	6.5e-10	13_55915008_A_G	rs9537160
rs1960704	13	55915404	0	G	T	0.267182	0.999735	35.9063	2.1e-09	-0.00861202	0.00139426	38.1524	6.5e-10	13_55915404_G_T	rs9537160
rs564891	13	55916778	0	A	T	0.267177	0.999726	35.9174	2.1e-09	-0.00861302	0.00139427	38.161	6.5e-10	13_55916778_A_T	rs9537160
rs621133	13	55921966	0	A	G	0.267226	0.99955	35.9388	2e-09	-0.00861532	0.00139432	38.1785	6.5e-10	13_55921966_A_G	rs9537160
rs9537080	13	55924955	0	G	A	0.267245	0.999577	35.9245	2.1e-09	-0.00861308	0.00139427	38.1614	6.5e-10	13_55924955_G_A	rs9537160
rs7144011	14	79940383	0	G	T	0.778548	0.996051	40.6486	1.8e-10	-0.00921094	0.0014908	38.174	6.5e-10	14_79940383_G_T	rs10136360
rs4439973	2	166322550	0	G	A	0.763438	0.999638	42.3049	7.8e-11	0.00896881	0.00145213	38.1468	6.6e-10	2_166322550_G_A	rs16850592
rs4667488	2	166362408	0	C	T	0.767045	0.9978	42.0093	9.1e-11	0.00902147	0.00146087	38.1359	6.6e-10	2_166362408_C_T	rs16850592
rs79862839	7	72921609	0	T	C	0.876844	0.999636	36.4713	1.5e-09	0.0115986	0.00187825	38.1332	6.6e-10	7_72921609_T_C	rs33951980
rs10437886	12	78749794	0	C	T	0.553963	0.984636	45.375	1.6e-11	0.00773643	0.00125259	38.1475	6.6e-10	12_78749794_C_T	rs12581220
rs639698	13	55914348	0	T	G	0.26719	0.999739	35.8793	2.1e-09	-0.00860955	0.00139424	38.1318	6.6e-10	13_55914348_T_G	rs9537160
rs563986	13	55916894	0	C	A	0.267192	0.999636	35.899	2.1e-09	-0.00861045	0.00139431	38.1358	6.6e-10	13_55916894_C_A	rs9537160
rs532686	13	55918046	0	T	C	0.267171	0.999713	35.8799	2.1e-09	-0.00860874	0.00139429	38.1218	6.6e-10	13_55918046_T_C	rs9537160
rs610517	13	55918784	0	G	A	0.267172	0.999714	35.8978	2.1e-09	-0.00861119	0.00139428	38.1438	6.6e-10	13_55918784_G_A	rs9537160
rs9537081	13	55925032	0	T	C	0.267284	0.99959	35.8992	2.1e-09	-0.00860932	0.00139417	38.1333	6.6e-10	13_55925032_T_C	rs9537160
rs9537128	13	56059237	0	C	A	0.719639	0.988382	38.114	6.7e-10	0.00853633	0.00138253	38.1233	6.6e-10	13_56059237_C_A	rs9537160
rs6545883	2	61772257	0	A	G	0.395429	1	39.8027	2.8e-10	-0.00779691	0.00126295	38.1131	6.7e-10	2_61772257_A_G	rs1562308
rs1514755	2	166299635	0	A	G	0.75997	0.995089	42.1072	8.6e-11	0.00893205	0.00144691	38.1085	6.7e-10	2_166299635_A_G	rs16850592
rs16850737	2	166325862	0	T	C	0.763445	0.999565	42.264	8e-11	0.00896484	0.00145213	38.1133	6.7e-10	2_166325862_T_C	rs16850592
rs816375	6	54007284	0	G	A	0.639236	0.998956	41.9914	9.2e-11	-0.00794203	0.0012867	38.0984	6.7e-10	6_54007284_G_A	rs816366
rs60982449	7	72873420	0	A	G	0.876522	0.99904	36.3979	1.6e-09	0.0115825	0.00187609	38.1152	6.7e-10	7_72873420_A_G	rs33951980
rs13244268	7	72911843	0	T	C	0.876868	0.999848	36.378	1.6e-09	0.0115934	0.00187825	38.0991	6.7e-10	7_72911843_T_C	rs33951980
rs11012730	10	21811487	0	G	A	0.648822	0.990108	34.6422	4e-09	-0.00802622	0.00130027	38.1025	6.7e-10	10_21811487_G_A	rs7072776
rs2760085	11	31654809	0	T	G	0.537953	0.999705	38.1793	6.5e-10	0.00765219	0.00123951	38.113	6.7e-10	11_31654809_T_G	rs2761589
rs10835802	11	31693226	0	G	A	0.537959	0.999498	38.2858	6.1e-10	0.0076531	0.00123965	38.1132	6.7e-10	11_31693226_G_A	rs2761589
rs3105059	13	55926777	0	G	A	0.267259	0.999722	35.8635	2.1e-09	-0.00860476	0.00139413	38.0954	6.7e-10	13_55926777_G_A	rs9537160
rs596177	13	55930271	0	A	G	0.267262	0.999739	35.8576	2.1e-09	-0.00860442	0.00139411	38.0931	6.7e-10	13_55930271_A_G	rs9537160
rs3105051	13	55943600	0	T	G	0.267227	0.999725	35.8611	2.1e-09	-0.00860585	0.00139418	38.1021	6.7e-10	13_55943600_T_G	rs9537160
rs7983438	13	99103317	0	T	C	0.701985	0.996037	41.9172	9.5e-11	0.00834454	0.00135182	38.1039	6.7e-10	13_99103317_T_C	rs7334078
rs816378	6	53998123	0	T	G	0.636937	0.994811	43.543	4.1e-11	-0.00794522	0.00128739	38.0881	6.8e-10	6_53998123_T_G	rs816366
rs10457480	6	126812609	0	C	G	0.697788	0.995334	37.716	8.2e-10	-0.0083187	0.00134796	38.0854	6.8e-10	6_126812609_C_G	rs10457480
rs35336290	10	21774886	0	T	A	0.642187	0.995953	37.1255	1.1e-09	-0.00797215	0.00129184	38.0835	6.8e-10	10_21774886_T_A	rs7072776
rs3124430	13	55926637	0	G	T	0.267262	0.999742	35.8558	2.1e-09	-0.00860416	0.00139411	38.0908	6.8e-10	13_55926637_G_T	rs9537160
rs596158	13	55930262	0	T	C	0.26728	0.999682	35.8105	2.2e-09	-0.00860169	0.00139411	38.0693	6.8e-10	13_55930262_T_C	rs9537160
rs937610	13	55940168	0	G	A	0.267193	0.999835	35.8381	2.1e-09	-0.00860254	0.00139416	38.0742	6.8e-10	13_55940168_G_A	rs9537160
rs1828885	2	166290978	0	G	A	0.763949	0.992307	41.6368	1.1e-10	0.0089884	0.00145736	38.039	6.9e-10	2_166290978_G_A	rs16850592
rs16850755	2	166340584	0	T	A	0.764275	0.998652	41.7841	1e-10	0.00897233	0.0014547	38.0421	6.9e-10	2_166340584_T_A	rs16850592
rs4301306	6	54024643	0	G	A	0.360092	0.998747	41.9216	9.5e-11	0.00793971	0.00128728	38.0422	6.9e-10	6_54024643_G_A	rs816366
rs6957745	7	73056750	0	T	C	0.796829	0.989753	36.1756	1.8e-09	0.00951731	0.00154312	38.0391	6.9e-10	7_73056750_T_C	rs33951980
rs574958	13	55929734	0	C	T	0.267254	0.99969	35.8186	2.2e-09	-0.00859937	0.00139415	38.0463	6.9e-10	13_55929734_C_T	rs9537160
rs631542	13	55933966	0	A	G	0.267225	0.999855	35.792	2.2e-09	-0.00859832	0.00139409	38.0402	6.9e-10	13_55933966_A_G	rs9537160
rs3105050	13	55941620	0	C	T	0.26721	0.999916	35.8257	2.2e-09	-0.00859935	0.00139408	38.0503	6.9e-10	13_55941620_C_T	rs9537160
rs3105054	13	55944070	0	T	A	0.267199	0.999842	35.8113	2.2e-09	-0.00859954	0.00139414	38.0484	6.9e-10	13_55944070_T_A	rs9537160
rs3124423	13	55944170	0	A	T	0.267201	0.999831	35.8162	2.2e-09	-0.00860081	0.00139414	38.0599	6.9e-10	13_55944170_A_T	rs9537160
rs11841159	13	56036314	0	A	C	0.72176	0.997003	38.0478	6.9e-10	0.0085065	0.00137931	38.0347	6.9e-10	13_56036314_A_C	rs9537160
rs7772104	6	98475160	0	A	G	0.562442	0.999265	41.971	9.3e-11	0.00768986	0.001247	38.0282	7e-10	6_98475160_A_G	rs9387963
rs10457481	6	126813721	0	G	A	0.697817	0.995327	37.6499	8.5e-10	-0.00831316	0.00134801	38.0318	7e-10	6_126813721_G_A	rs10457480
rs273565	11	30918425	0	G	A	0.32732	0.995477	41.0735	1.5e-10	-0.00812615	0.00131769	38.0314	7e-10	11_30918425_G_A	rs2761589
rs273559	11	30923223	0	C	T	0.327351	0.99526	41.1039	1.4e-10	-0.008126	0.00131773	38.0275	7e-10	11_30923223_C_T	rs2761589
rs175398	11	30930393	0	T	G	0.327935	0.993581	40.9199	1.6e-10	-0.0081238	0.00131772	38.0076	7e-10	11_30930393_T_G	rs2761589
rs7984867	13	55931377	0	T	C	0.267209	0.999896	35.7819	2.2e-09	-0.00859659	0.00139409	38.0254	7e-10	13_55931377_T_C	rs9537160
rs494832	13	55932469	0	T	C	0.267212	0.99993	35.7567	2.2e-09	-0.00859521	0.00139407	38.0139	7e-10	13_55932469_T_C	rs9537160
rs616312	13	55932850	0	C	A	0.26721	0.999912	35.7657	2.2e-09	-0.00859594	0.00139409	38.0196	7e-10	13_55932850_C_A	rs9537160
rs499584	13	55933003	0	A	G	0.267207	0.999912	35.7656	2.2e-09	-0.00859501	0.00139408	38.0114	7e-10	13_55933003_A_G	rs9537160
rs619592	13	55933593	0	G	C	0.267208	0.999916	35.767	2.2e-09	-0.00859513	0.00139408	38.0126	7e-10	13_55933593_G_C	rs9537160
rs555318	13	55934462	0	G	A	0.267208	0.999915	35.7662	2.2e-09	-0.00859505	0.00139408	38.0119	7e-10	13_55934462_G_A	rs9537160
rs645758	13	55934856	0	C	G	0.267207	0.999919	35.7676	2.2e-09	-0.0085952	0.00139408	38.0132	7e-10	13_55934856_C_G	rs9537160
rs560815	13	55935080	0	T	A	0.267175	0.999747	35.7535	2.2e-09	-0.00859596	0.00139428	38.0092	7e-10	13_55935080_T_A	rs9537160
rs1697499	13	55936301	0	C	T	0.267181	0.99959	35.7833	2.2e-09	-0.00859705	0.00139419	38.024	7e-10	13_55936301_C_T	rs9537160
rs1978802	13	55937087	0	C	T	0.267221	0.999884	35.777	2.2e-09	-0.00859575	0.00139407	38.0191	7e-10	13_55937087_C_T	rs9537160
rs3105047	13	55937194	0	C	A	0.2673	1	35.5983	2.4e-09	-0.00859391	0.00139386	38.0137	7e-10	13_55937194_C_A	rs9537160
rs3105052	13	55943682	0	C	A	0.267211	0.9999	35.8018	2.2e-09	-0.00859648	0.00139409	38.0241	7e-10	13_55943682_C_A	rs9537160
rs3124399	13	55975582	0	G	A	0.26719	0.999071	35.8168	2.2e-09	-0.00860027	0.00139461	38.0296	7e-10	13_55975582_G_A	rs9537160
rs3124383	13	55984262	0	G	A	0.26716	0.998833	35.8535	2.1e-09	-0.00859979	0.00139489	38.0098	7e-10	13_55984262_G_A	rs9537160
rs9527390	13	56024655	0	A	C	0.721645	0.996728	38.0389	6.9e-10	0.00850546	0.0013793	38.0256	7e-10	13_56024655_A_C	rs9537160
rs9527395	13	56052217	0	G	A	0.721784	0.99658	38.0193	7e-10	0.00850583	0.0013796	38.0123	7e-10	13_56052217_G_A	rs9537160
rs9537123	13	56054588	0	A	G	0.721788	0.996577	38.0184	7e-10	0.00850546	0.00137962	38.0084	7e-10	13_56054588_A_G	rs9537160
rs9537125	13	56057106	0	A	G	0.721828	0.99669	37.9804	7.1e-10	0.0085054	0.00137959	38.0092	7e-10	13_56057106_A_G	rs9537160
rs12261	13	99100547	0	T	C	0.418872	0.988511	38.6476	5.1e-10	-0.00776335	0.00125902	38.0221	7e-10	13_99100547_T_C	rs7334078
rs792455	10	22193422	0	T	C	0.289575	0.99486	40.504	2e-10	0.00841365	0.0013649	37.9986	7.1e-10	10_22193422_T_C	rs7072776
rs644857	13	55934666	0	A	G	0.267212	0.999901	35.7371	2.3e-09	-0.00859169	0.00139409	37.9819	7.1e-10	13_55934666_A_G	rs9537160
rs596364	13	55938640	0	T	C	0.267216	0.99992	35.7367	2.3e-09	-0.00859182	0.00139405	37.9853	7.1e-10	13_55938640_T_C	rs9537160
rs520268	13	55939662	0	T	C	0.267216	0.999914	35.7412	2.3e-09	-0.00859134	0.00139406	37.9801	7.1e-10	13_55939662_T_C	rs9537160
rs1697505	13	55940381	0	A	G	0.267216	0.999926	35.7658	2.2e-09	-0.00859353	0.00139406	38	7.1e-10	13_55940381_A_G	rs9537160
rs4885822	13	55951646	0	G	T	0.267104	0.998911	35.7284	2.3e-09	-0.00859787	0.00139499	37.9873	7.1e-10	13_55951646_G_T	rs9537160
rs3124397	13	55975649	0	T	C	0.267198	0.999191	35.7567	2.2e-09	-0.00859525	0.00139458	37.9865	7.1e-10	13_55975649_T_C	rs9537160
rs3124396	13	55977400	0	T	C	0.267199	0.9992	35.7605	2.2e-09	-0.00859567	0.00139457	37.9907	7.1e-10	13_55977400_T_C	rs9537160
rs3105073	13	55977684	0	G	A	0.267196	0.999205	35.7633	2.2e-09	-0.00859479	0.00139457	37.9831	7.1e-10	13_55977684_G_A	rs9537160
rs2315892	13	55980913	0	C	T	0.267228	0.99904	35.7696	2.2e-09	-0.0085949	0.00139464	37.9803	7.1e-10	13_55980913_C_T	rs9537160
rs2315891	13	55981120	0	A	G	0.267301	0.998701	35.796	2.2e-09	-0.00859816	0.00139477	38.0021	7.1e-10	13_55981120_A_G	rs9537160
rs3105033	13	55981579	0	A	G	0.267145	0.998889	35.8342	2.1e-09	-0.00859667	0.00139489	37.9825	7.1e-10	13_55981579_A_G	rs9537160
rs3124391	13	55981960	0	G	C	0.267194	0.999204	35.7672	2.2e-09	-0.00859493	0.00139457	37.9843	7.1e-10	13_55981960_G_C	rs9537160
rs3105032	13	55982418	0	A	G	0.267145	0.998889	35.8335	2.1e-09	-0.00859659	0.00139489	37.9818	7.1e-10	13_55982418_A_G	rs9537160
rs3105031	13	55982577	0	A	G	0.267187	0.998725	35.8347	2.1e-09	-0.00859687	0.00139495	37.9809	7.1e-10	13_55982577_A_G	rs9537160
rs2315888	13	55983456	0	T	C	0.267145	0.998889	35.8335	2.1e-09	-0.00859659	0.00139489	37.9818	7.1e-10	13_55983456_T_C	rs9537160
rs2315887	13	55983567	0	T	C	0.267145	0.998889	35.8335	2.1e-09	-0.00859659	0.00139489	37.9818	7.1e-10	13_55983567_T_C	rs9537160
rs2315886	13	55983789	0	G	A	0.267145	0.998889	35.837	2.1e-09	-0.00859701	0.00139489	37.9855	7.1e-10	13_55983789_G_A	rs9537160
rs3124381	13	55984579	0	G	A	0.267146	0.998884	35.8307	2.2e-09	-0.00859656	0.00139489	37.9813	7.1e-10	13_55984579_G_A	rs9537160
rs3124380	13	55984944	0	T	C	0.267146	0.998885	35.8304	2.2e-09	-0.00859653	0.00139489	37.9811	7.1e-10	13_55984944_T_C	rs9537160
rs9597187	13	56044004	0	A	G	0.721753	0.996972	38.0042	7.1e-10	0.00850174	0.00137931	37.9919	7.1e-10	13_56044004_A_G	rs9537160
rs2465054	6	51174232	0	G	A	0.648974	0.987917	38.5147	5.4e-10	0.00803079	0.00130348	37.9585	7.2e-10	6_51174232_G_A	rs2504671
rs714052	7	72864869	0	A	G	0.876142	1	36.6329	1.4e-09	0.011554	0.00187496	37.9734	7.2e-10	7_72864869_A_G	rs33951980
rs175399	11	30930374	0	A	C	0.327914	0.993497	40.8553	1.6e-10	-0.00811854	0.0013178	37.9541	7.2e-10	11_30930374_A_C	rs2761589
rs646620	13	55935007	0	A	G	0.267211	0.999939	35.7344	2.3e-09	-0.008591	0.00139407	37.9768	7.2e-10	13_55935007_A_G	rs9537160
rs598213	13	55939045	0	C	T	0.267217	0.999917	35.7219	2.3e-09	-0.0085903	0.00139405	37.9718	7.2e-10	13_55939045_C_T	rs9537160
rs3105055	13	55944679	0	T	C	0.267217	0.999909	35.7418	2.3e-09	-0.00859058	0.00139407	37.9732	7.2e-10	13_55944679_T_C	rs9537160
rs4885823	13	55951798	0	A	C	0.267089	0.998511	35.663	2.3e-09	-0.00859645	0.00139522	37.9621	7.2e-10	13_55951798_A_C	rs9537160
rs4885841	13	55979974	0	T	C	0.267203	0.999145	35.7516	2.2e-09	-0.00859366	0.00139459	37.972	7.2e-10	13_55979974_T_C	rs9537160
rs2315890	13	55981176	0	C	A	0.267303	0.998698	35.7683	2.2e-09	-0.00859469	0.00139477	37.9713	7.2e-10	13_55981176_C_A	rs9537160
rs8481	13	99105395	0	G	A	0.707199	0.99864	41.7876	1e-10	0.00836715	0.0013579	37.9683	7.2e-10	13_99105395_G_A	rs7334078
rs10146997	14	79945162	0	A	G	0.77772	1	40.5175	1.9e-10	-0.009163	0.00148703	37.9696	7.2e-10	14_79945162_A_G	rs10136360
rs604740	19	49273213	0	T	C	0.644802	0.993305	27.747	1.4e-07	-0.00797769	0.00129451	37.9787	7.2e-10	19_49273213_T_C	rs838133
rs35779991	3	25090477	0	T	C	0.470894	0.984511	29.9808	4.4e-08	-0.00767452	0.00124596	37.9398	7.3e-10	3_25090477_T_C	rs7619139
rs13194250	6	98494218	0	C	T	0.562523	0.9992	41.8981	9.6e-11	0.00768211	0.00124714	37.943	7.3e-10	6_98494218_C_T	rs9387963
rs35695283	7	72893403	0	A	G	0.876884	0.999509	36.2305	1.8e-09	0.0115702	0.00187871	37.9285	7.3e-10	7_72893403_A_G	rs33951980
rs1232199	11	31685269	0	A	G	0.537861	0.999729	38.0268	7e-10	0.0076357	0.00123952	37.9484	7.3e-10	11_31685269_A_G	rs2761589
rs3124427	13	55937333	0	A	G	0.26722	0.999937	35.694	2.3e-09	-0.00858627	0.00139403	37.9369	7.3e-10	13_55937333_A_G	rs9537160
rs1370064	13	55937648	0	C	A	0.26722	0.999937	35.694	2.3e-09	-0.00858627	0.00139403	37.9369	7.3e-10	13_55937648_C_A	rs9537160
rs1697502	13	55937706	0	C	T	0.26722	0.999933	35.6821	2.3e-09	-0.00858504	0.00139404	37.9259	7.3e-10	13_55937706_C_T	rs9537160
rs9527384	13	56011332	0	C	A	0.727102	0.989903	37.2111	1.1e-09	0.00857548	0.00139228	37.937	7.3e-10	13_56011332_C_A	rs9537160
rs9316799	13	56038253	0	A	G	0.721898	0.996774	37.9671	7.2e-10	0.00849857	0.00137977	37.9386	7.3e-10	13_56038253_A_G	rs9537160
rs4255667	13	56050326	0	C	T	0.721749	0.996927	37.9283	7.3e-10	0.00849655	0.0013793	37.9464	7.3e-10	13_56050326_C_T	rs9537160
rs7986604	13	56053234	0	G	T	0.721815	0.996637	37.9326	7.3e-10	0.00849818	0.00137962	37.9432	7.3e-10	13_56053234_G_T	rs9537160
rs11843194	13	56055121	0	T	A	0.721829	0.996698	37.921	7.4e-10	0.00849816	0.00137959	37.9445	7.3e-10	13_56055121_T_A	rs9537160
rs4572276	13	56055295	0	G	A	0.721829	0.9967	37.9218	7.4e-10	0.00849829	0.00137959	37.9458	7.3e-10	13_56055295_G_A	rs9537160
rs9527397	13	56056450	0	G	A	0.721832	0.996679	37.9163	7.4e-10	0.00849741	0.0013796	37.9371	7.3e-10	13_56056450_G_A	rs9537160
rs9527398	13	56056537	0	T	C	0.721832	0.996679	37.9163	7.4e-10	0.00849741	0.0013796	37.9371	7.3e-10	13_56056537_T_C	rs9537160
rs12877540	13	56057565	0	G	A	0.721833	0.996689	37.9163	7.4e-10	0.00849715	0.0013796	37.9348	7.3e-10	13_56057565_G_A	rs9537160
rs4886649	15	75328595	0	T	C	0.636115	0.972008	35.2792	2.9e-09	0.00801414	0.00130099	37.9461	7.3e-10	15_75328595_T_C	rs2472297
rs4667827	2	166368244	0	G	A	0.764332	0.997549	41.9586	9.3e-11	0.00895876	0.00145474	37.9249	7.4e-10	2_166368244_G_A	rs16850592
rs816387	6	54039127	0	T	C	0.357997	0.996682	41.9839	9.2e-11	0.00794648	0.00129046	37.9192	7.4e-10	6_54039127_T_C	rs816366
rs7760876	6	98481755	0	C	T	0.562441	0.999264	41.8367	9.9e-11	0.007677	0.00124702	37.8997	7.4e-10	6_98481755_C_T	rs9387963
rs273564	11	30918860	0	A	G	0.327367	0.995624	40.9626	1.6e-10	-0.00811294	0.00131756	37.9152	7.4e-10	11_30918860_A_G	rs2761589
rs273562	11	30920430	0	A	T	0.328133	0.99444	40.8402	1.7e-10	-0.00810962	0.00131691	37.9219	7.4e-10	11_30920430_A_T	rs2761589
rs1370068	13	55935588	0	G	A	0.267222	0.999942	35.6724	2.3e-09	-0.00858444	0.00139403	37.9209	7.4e-10	13_55935588_G_A	rs9537160
rs1370069	13	55935671	0	G	T	0.267219	0.999941	35.6794	2.3e-09	-0.00858484	0.00139404	37.9239	7.4e-10	13_55935671_G_T	rs9537160
rs1370070	13	55935901	0	C	G	0.267219	0.999941	35.6794	2.3e-09	-0.00858484	0.00139404	37.9239	7.4e-10	13_55935901_C_G	rs9537160
rs1697498	13	55935917	0	G	A	0.267219	0.999941	35.6794	2.3e-09	-0.00858484	0.00139404	37.9239	7.4e-10	13_55935917_G_A	rs9537160
rs1657216	13	55936485	0	A	G	0.267221	0.99996	35.6713	2.3e-09	-0.00858421	0.00139403	37.919	7.4e-10	13_55936485_A_G	rs9537160
rs1697500	13	55936562	0	T	A	0.267219	0.99994	35.6794	2.3e-09	-0.00858484	0.00139404	37.9239	7.4e-10	13_55936562_T_A	rs9537160
rs1657217	13	55936603	0	A	G	0.267219	0.99994	35.6794	2.3e-09	-0.00858484	0.00139404	37.9239	7.4e-10	13_55936603_A_G	rs9537160
rs7317475	13	55951738	0	G	C	0.2672	0.998176	35.6188	2.4e-09	-0.00859263	0.0013954	37.9189	7.4e-10	13_55951738_G_C	rs9537160
rs6722128	2	166342728	0	A	G	0.762483	0.997803	41.0883	1.5e-10	0.0089339	0.00145127	37.8955	7.5e-10	2_166342728_A_G	rs16850592
rs10457478	6	126704934	0	C	G	0.687091	0.999373	36.6241	1.4e-09	-0.00820305	0.00133256	37.8948	7.5e-10	6_126704934_C_G	rs10457480
rs3105079	13	55959226	0	A	G	0.267069	0.999195	35.6333	2.4e-09	-0.00858643	0.00139483	37.8952	7.5e-10	13_55959226_A_G	rs9537160
rs4885853	13	55989783	0	G	T	0.267233	0.998042	35.7462	2.2e-09	-0.0085875	0.00139526	37.8811	7.5e-10	13_55989783_G_T	rs9537160
rs9537122	13	56050719	0	T	A	0.721747	0.996929	37.8803	7.5e-10	0.00849094	0.00137929	37.8964	7.5e-10	13_56050719_T_A	rs9537160
rs4584	13	99101869	0	G	C	0.705952	0.996965	41.4096	1.2e-10	0.00835401	0.00135726	37.8847	7.5e-10	13_99101869_G_C	rs7334078
rs10146690	14	79890456	0	G	A	0.783643	0.98575	40.4775	2e-10	-0.00929515	0.0015101	37.8882	7.5e-10	14_79890456_G_A	rs10136360
rs67086575	2	27686480	0	A	G	0.825591	0.977041	41.0138	1.5e-10	-0.0101204	0.00164451	37.8725	7.6e-10	2_27686480_A_G	rs1260326
rs9296656	6	51396744	0	C	A	0.70924	0.988975	39.7183	2.9e-10	0.00841816	0.00136833	37.8489	7.6e-10	6_51396744_C_A	rs2504671
rs9388046	6	98491210	0	G	A	0.562194	0.998998	41.7572	1e-10	0.00767249	0.00124714	37.8479	7.6e-10	6_98491210_G_A	rs9387963
rs35330527	7	72870207	0	A	G	0.876544	0.998983	36.0351	1.9e-09	0.0115458	0.00187638	37.8626	7.6e-10	7_72870207_A_G	rs33951980
rs34482346	7	72915521	0	G	C	0.876885	0.999819	36.1492	1.8e-09	0.0115572	0.0018784	37.8551	7.6e-10	7_72915521_G_C	rs33951980
rs13221253	7	72922233	0	A	G	0.876546	0.998355	36.1473	1.8e-09	0.0115446	0.00187643	37.852	7.6e-10	7_72922233_A_G	rs33951980
rs273560	11	30922081	0	C	T	0.328117	0.994438	40.7982	1.7e-10	-0.00810403	0.0013169	37.8702	7.6e-10	11_30922081_C_T	rs2761589
rs395032	11	30927200	0	T	C	0.327462	0.995246	40.9323	1.6e-10	-0.00810842	0.0013177	37.8649	7.6e-10	11_30927200_T_C	rs2761589
rs2037613	11	31784451	0	T	C	0.465078	0.991322	38.1472	6.6e-10	-0.00765545	0.00124396	37.8726	7.6e-10	11_31784451_T_C	rs2761589
rs9537099	13	55965079	0	C	T	0.267143	0.999447	35.5963	2.4e-09	-0.00857879	0.00139444	37.8486	7.6e-10	13_55965079_C_T	rs9537160
rs3124411	13	55965666	0	T	C	0.267141	0.999548	35.6023	2.4e-09	-0.008579	0.00139445	37.8499	7.6e-10	13_55965666_T_C	rs9537160
rs3105040	13	55966968	0	T	G	0.267141	0.999547	35.6022	2.4e-09	-0.00857898	0.00139446	37.8497	7.6e-10	13_55966968_T_G	rs9537160
rs3124406	13	55970389	0	G	A	0.267141	0.999532	35.6001	2.4e-09	-0.00857905	0.00139446	37.85	7.6e-10	13_55970389_G_A	rs9537160
rs3105037	13	55970733	0	T	C	0.267159	0.999465	35.6096	2.4e-09	-0.00857927	0.00139449	37.8504	7.6e-10	13_55970733_T_C	rs9537160
rs3124405	13	55970997	0	G	T	0.267134	0.999579	35.6117	2.4e-09	-0.00857954	0.00139444	37.8553	7.6e-10	13_55970997_G_T	rs9537160
rs3124377	13	55985612	0	C	T	0.267129	0.998877	35.7182	2.3e-09	-0.00858268	0.00139492	37.8571	7.6e-10	13_55985612_C_T	rs9537160
rs11838758	13	56037167	0	G	A	0.721731	0.997003	37.8135	7.8e-10	0.00848631	0.00137925	37.8574	7.6e-10	13_56037167_G_A	rs9537160
rs633236	19	49274975	0	C	T	0.644966	0.981	27.694	1.4e-07	-0.00801094	0.00130215	37.848	7.6e-10	19_49274975_C_T	rs838133
rs16850751	2	166340536	0	A	T	0.764104	0.998571	41.4902	1.2e-10	0.0089455	0.00145435	37.8328	7.7e-10	2_166340536_A_T	rs16850592
rs1407235	6	54022371	0	A	G	0.639567	0.998925	41.6594	1.1e-10	-0.0079157	0.00128698	37.83	7.7e-10	6_54022371_A_G	rs816366
rs163885	11	30945365	0	C	T	0.328122	0.99343	40.8454	1.6e-10	-0.00810636	0.00131803	37.8271	7.7e-10	11_30945365_C_T	rs2761589
rs3124416	13	55960500	0	C	T	0.267132	0.999627	35.5744	2.5e-09	-0.00857649	0.00139442	37.8295	7.7e-10	13_55960500_C_T	rs9537160
rs3105080	13	55960882	0	A	G	0.267132	0.999629	35.5816	2.4e-09	-0.00857705	0.00139442	37.8347	7.7e-10	13_55960882_A_G	rs9537160
rs3124415	13	55961052	0	T	A	0.26713	0.999603	35.5817	2.4e-09	-0.00857696	0.00139444	37.8329	7.7e-10	13_55961052_T_A	rs9537160
rs3124414	13	55961134	0	C	T	0.267129	0.999599	35.5877	2.4e-09	-0.0085774	0.00139443	37.8369	7.7e-10	13_55961134_C_T	rs9537160
rs3124413	13	55961418	0	C	T	0.267141	0.999551	35.5962	2.4e-09	-0.00857854	0.00139446	37.8457	7.7e-10	13_55961418_C_T	rs9537160
rs3105046	13	55962898	0	T	C	0.267133	0.999616	35.5739	2.5e-09	-0.00857644	0.00139442	37.8291	7.7e-10	13_55962898_T_C	rs9537160
rs3105045	13	55963117	0	T	C	0.267146	0.999555	35.5934	2.4e-09	-0.00857845	0.00139445	37.8454	7.7e-10	13_55963117_T_C	rs9537160
rs3105044	13	55963350	0	T	A	0.267129	0.999599	35.5877	2.4e-09	-0.0085774	0.00139443	37.8369	7.7e-10	13_55963350_T_A	rs9537160
rs3105043	13	55963930	0	A	G	0.267145	0.999564	35.5891	2.4e-09	-0.0085781	0.00139444	37.8427	7.7e-10	13_55963930_A_G	rs9537160
rs3105042	13	55964451	0	T	A	0.267145	0.999564	35.5891	2.4e-09	-0.0085781	0.00139444	37.8427	7.7e-10	13_55964451_T_A	rs9537160
rs3124412	13	55964714	0	C	A	0.267144	0.999563	35.589	2.4e-09	-0.00857808	0.00139444	37.8424	7.7e-10	13_55964714_C_A	rs9537160
rs3124410	13	55966218	0	C	T	0.267129	0.999599	35.5877	2.4e-09	-0.0085774	0.00139443	37.8369	7.7e-10	13_55966218_C_T	rs9537160
rs3105039	13	55967647	0	A	G	0.267141	0.999546	35.5998	2.4e-09	-0.00857864	0.00139446	37.8467	7.7e-10	13_55967647_A_G	rs9537160
rs9527375	13	55969526	0	G	A	0.267132	0.999609	35.5824	2.4e-09	-0.00857722	0.00139442	37.836	7.7e-10	13_55969526_G_A	rs9537160
rs9316789	13	55973199	0	T	A	0.26713	0.999584	35.5856	2.4e-09	-0.00857747	0.00139444	37.8372	7.7e-10	13_55973199_T_A	rs9537160
rs3124403	13	55973622	0	C	A	0.26713	0.999586	35.5863	2.4e-09	-0.00857753	0.00139444	37.8377	7.7e-10	13_55973622_C_A	rs9537160
rs3742137	13	99102449	0	C	T	0.707632	0.997587	41.307	1.3e-10	0.00836119	0.00135923	37.84	7.7e-10	13_99102449_C_T	rs7334078
rs3742136	13	99102607	0	C	T	0.706443	0.997618	41.3211	1.3e-10	0.00834989	0.00135749	37.8347	7.7e-10	13_99102607_C_T	rs7334078
rs2084195	2	61756535	0	G	T	0.39928	0.996813	39.5859	3.1e-10	-0.00776199	0.00126222	37.8161	7.8e-10	2_61756535_G_T	rs1562308
rs1984632	2	166284979	0	T	A	0.765344	0.992707	41.4508	1.2e-10	0.00897605	0.00145995	37.8003	7.8e-10	2_166284979_T_A	rs16850592
rs62174738	2	166300973	0	A	C	0.760785	0.995542	41.7175	1.1e-10	0.00890956	0.00144904	37.8053	7.8e-10	2_166300973_A_C	rs16850592
rs6734442	2	166339106	0	T	C	0.763957	0.999495	41.4794	1.2e-10	0.0089375	0.00145333	37.8182	7.8e-10	2_166339106_T_C	rs16850592
rs10948615	6	51339421	0	A	C	0.690292	0.993816	38.1438	6.6e-10	0.00824329	0.00134064	37.8075	7.8e-10	6_51339421_A_C	rs2504671
rs1407236	6	54022441	0	C	G	0.639531	0.998973	41.6509	1.1e-10	-0.00791372	0.00128695	37.8129	7.8e-10	6_54022441_C_G	rs816366
rs1487445	6	98565211	0	C	T	0.517646	1	39.9876	2.6e-10	0.00762567	0.00124016	37.8097	7.8e-10	6_98565211_C_T	rs9387963
rs874149	10	21768560	0	A	G	0.642105	0.993435	37.1462	1.1e-09	-0.00795461	0.0012935	37.8185	7.8e-10	10_21768560_A_G	rs7072776
rs2315898	13	55954916	0	G	A	0.267128	0.999332	35.5789	2.4e-09	-0.00857591	0.00139462	37.8135	7.8e-10	13_55954916_G_A	rs9537160
rs2873024	13	55956143	0	G	A	0.267083	0.999202	35.5581	2.5e-09	-0.0085756	0.0013948	37.8011	7.8e-10	13_55956143_G_A	rs9537160
rs3124419	13	55957152	0	C	A	0.267083	0.9992	35.5581	2.5e-09	-0.00857556	0.0013948	37.8008	7.8e-10	13_55957152_C_A	rs9537160
rs2315896	13	55958199	0	C	T	0.267084	0.999174	35.5761	2.5e-09	-0.00857786	0.00139481	37.8207	7.8e-10	13_55958199_C_T	rs9537160
rs3105076	13	55958335	0	A	C	0.267084	0.999176	35.5757	2.5e-09	-0.00857781	0.00139481	37.8203	7.8e-10	13_55958335_A_C	rs9537160
rs3105078	13	55958949	0	A	C	0.267033	0.999211	35.5227	2.5e-09	-0.0085756	0.00139485	37.7983	7.8e-10	13_55958949_A_C	rs9537160
rs3124418	13	55958958	0	C	T	0.267018	0.999284	35.5285	2.5e-09	-0.00857571	0.00139482	37.8008	7.8e-10	13_55958958_C_T	rs9537160
rs3124404	13	55971183	0	A	G	0.267132	0.999576	35.5622	2.5e-09	-0.00857457	0.00139444	37.8117	7.8e-10	13_55971183_A_G	rs9537160
rs3105036	13	55972428	0	G	C	0.267132	0.999576	35.5622	2.5e-09	-0.00857457	0.00139444	37.8117	7.8e-10	13_55972428_G_C	rs9537160
rs3124374	13	55988258	0	A	G	0.267171	0.998591	35.658	2.4e-09	-0.00857638	0.001395	37.7973	7.8e-10	13_55988258_A_G	rs9537160
rs3105025	13	55988519	0	A	G	0.267171	0.998591	35.6584	2.4e-09	-0.00857643	0.001395	37.7978	7.8e-10	13_55988519_A_G	rs9537160
rs3124373	13	55988609	0	A	G	0.267171	0.998591	35.6584	2.4e-09	-0.00857643	0.001395	37.7978	7.8e-10	13_55988609_A_G	rs9537160
rs12463	13	99105302	0	G	A	0.707343	0.998417	41.3894	1.2e-10	0.00835233	0.00135823	37.8156	7.8e-10	13_99105302_G_A	rs7334078
rs28399443	19	41354306	0	G	A	0.97883	1	36.0466	1.9e-09	-0.0265106	0.00431151	37.8078	7.8e-10	19_41354306_G_A	rs117287096
rs9395908	6	54019101	0	A	C	0.640662	0.997389	41.6732	1.1e-10	-0.00792141	0.00128873	37.7816	7.9e-10	6_54019101_A_C	rs816366
rs864642	6	54025859	0	T	A	0.360455	0.999098	41.6476	1.1e-10	0.00791178	0.00128693	37.7955	7.9e-10	6_54025859_T_A	rs816366
rs9401458	6	98458340	0	C	T	0.605795	0.998508	39.5118	3.3e-10	0.0077821	0.00126602	37.7847	7.9e-10	6_98458340_C_T	rs9387963
rs273608	11	30941272	0	C	A	0.328059	0.994382	40.7836	1.7e-10	-0.00809847	0.00131756	37.7804	7.9e-10	11_30941272_C_A	rs2761589
rs2315895	13	55968063	0	C	T	0.267128	0.999602	35.5384	2.5e-09	-0.00857264	0.00139443	37.795	7.9e-10	13_55968063_C_T	rs9537160
rs3105024	13	55988823	0	G	T	0.267224	0.998318	35.6506	2.4e-09	-0.00857568	0.00139511	37.785	7.9e-10	13_55988823_G_T	rs9537160
rs2937344	13	56001574	0	T	A	0.275385	0.997345	37.0436	1.2e-09	-0.00850188	0.00138309	37.7857	7.9e-10	13_56001574_T_A	rs9537160
rs1514752	2	166361695	0	C	T	0.768305	1	41.8005	1e-10	0.00899555	0.00146373	37.7688	8e-10	2_166361695_C_T	rs16850592
rs1464088	2	166365322	0	T	G	0.764429	0.999429	41.7197	1.1e-10	0.0089351	0.00145421	37.7526	8e-10	2_166365322_T_G	rs16850592
rs9490266	6	98418637	0	T	C	0.450966	0.999193	40.0454	2.5e-10	-0.00764412	0.001244	37.7587	8e-10	6_98418637_T_C	rs9387963
rs273601	11	30933646	0	C	T	0.328565	0.994092	40.6148	1.9e-10	-0.008093	0.00131699	37.7617	8e-10	11_30933646_C_T	rs2761589
rs172073	11	30934274	0	T	C	0.328219	0.994297	40.6902	1.8e-10	-0.00809518	0.00131748	37.7543	8e-10	11_30934274_T_C	rs2761589
rs2315884	13	55987506	0	T	C	0.267223	0.998322	35.6216	2.4e-09	-0.00857261	0.00139511	37.7581	8e-10	13_55987506_T_C	rs9537160
rs2315883	13	55987516	0	A	C	0.26717	0.998595	35.6295	2.4e-09	-0.00857338	0.001395	37.771	8e-10	13_55987516_A_C	rs9537160
rs3105027	13	55988043	0	A	G	0.267223	0.998322	35.6216	2.4e-09	-0.00857261	0.00139511	37.7581	8e-10	13_55988043_A_G	rs9537160
rs3124375	13	55988159	0	T	C	0.26717	0.998593	35.6281	2.4e-09	-0.00857322	0.001395	37.7696	8e-10	13_55988159_T_C	rs9537160
rs3124371	13	55989433	0	A	G	0.267139	0.997601	35.5694	2.5e-09	-0.00857738	0.0013958	37.7624	8e-10	13_55989433_A_G	rs9537160
rs3105065	13	55993394	0	A	G	0.262501	0.983522	35.9951	2e-09	-0.00868979	0.00141401	37.7669	8e-10	13_55993394_A_G	rs9537160
rs9168	13	99101583	0	C	A	0.707729	0.997005	41.0617	1.5e-10	0.00835637	0.0013598	37.7648	8e-10	13_99101583_C_A	rs7334078
rs778768	2	61790289	0	C	G	0.387656	0.996683	38.3464	5.9e-10	-0.00779665	0.00126909	37.7426	8.1e-10	2_61790289_C_G	rs1562308
rs273563	11	30919884	0	G	A	0.327993	0.994687	40.6785	1.8e-10	-0.00808895	0.0013169	37.7292	8.1e-10	11_30919884_G_A	rs2761589
rs1877870	2	166358261	0	T	C	0.764513	0.999811	41.7452	1e-10	0.00893208	0.00145434	37.7202	8.2e-10	2_166358261_T_C	rs16850592
rs13078110	3	35661187	0	C	T	0.789445	0.991508	33.7924	6.1e-09	-0.00933845	0.00152052	37.7193	8.2e-10	3_35661187_C_T	rs1513481
rs1093331	6	54041526	0	G	A	0.358105	0.996319	41.7562	1e-10	0.0079258	0.00129062	37.7132	8.2e-10	6_54041526_G_A	rs816366
rs12779865	10	21829162	0	T	C	0.669418	0.996946	33.008	9.2e-09	-0.0080768	0.00131539	37.7022	8.2e-10	10_21829162_T_C	rs7072776
rs163883	11	30947248	0	A	G	0.328037	0.993587	40.6247	1.8e-10	-0.00809485	0.00131828	37.7051	8.2e-10	11_30947248_A_G	rs2761589
rs163882	11	30947681	0	C	G	0.328048	0.993507	40.6293	1.8e-10	-0.00809485	0.00131832	37.703	8.2e-10	11_30947681_C_G	rs2761589
rs3105081	13	55954136	0	G	A	0.267091	0.998863	35.4678	2.6e-09	-0.00856668	0.00139502	37.7107	8.2e-10	13_55954136_G_A	rs9537160
rs10145154	14	79939525	0	C	T	0.777851	0.996252	40.2872	2.2e-10	-0.00914839	0.0014895	37.7231	8.2e-10	14_79939525_C_T	rs10136360
rs1514751	2	166354101	0	G	C	0.764438	0.99822	41.5095	1.2e-10	0.0089295	0.00145465	37.6825	8.3e-10	2_166354101_G_C	rs16850592
rs2197728	3	35638268	0	C	T	0.789618	0.989357	33.6633	6.6e-09	-0.00934591	0.00152254	37.6797	8.3e-10	3_35638268_C_T	rs1513481
rs684940	6	53961513	0	G	T	0.649732	1	42.7146	6.3e-11	-0.00795215	0.00129533	37.6883	8.3e-10	6_53961513_G_T	rs816366
rs12202204	6	126686407	0	A	G	0.686217	1	36.4199	1.6e-09	-0.00817605	0.00133167	37.6959	8.3e-10	6_126686407_A_G	rs10457480
rs2937340	13	55999627	0	A	C	0.275384	0.996953	36.9267	1.2e-09	-0.00849322	0.00138341	37.6912	8.3e-10	13_55999627_A_C	rs9537160
rs9563330	13	56002363	0	C	G	0.275429	0.997205	36.9385	1.2e-09	-0.00849272	0.00138319	37.6989	8.3e-10	13_56002363_C_G	rs9537160
rs2937320	13	56004251	0	G	C	0.275434	0.997229	36.9309	1.2e-09	-0.00849154	0.00138317	37.6899	8.3e-10	13_56004251_G_C	rs9537160
rs2315879	13	56005008	0	C	T	0.275434	0.997232	36.9288	1.2e-09	-0.00849136	0.00138317	37.6883	8.3e-10	13_56005008_C_T	rs9537160
rs2937325	13	56006808	0	A	G	0.275434	0.997226	36.9297	1.2e-09	-0.00849144	0.00138317	37.6888	8.3e-10	13_56006808_A_G	rs9537160
rs2937326	13	56006929	0	G	A	0.275434	0.997226	36.9297	1.2e-09	-0.00849144	0.00138317	37.6888	8.3e-10	13_56006929_G_A	rs9537160
rs2860443	13	56007138	0	C	T	0.275418	0.997093	36.9677	1.2e-09	-0.0084928	0.00138319	37.6995	8.3e-10	13_56007138_C_T	rs9537160
rs71556715	7	72881807	0	C	T	0.876602	0.99881	35.9112	2.1e-09	0.0115182	0.00187681	37.6642	8.4e-10	7_72881807_C_T	rs33951980
rs3013338	13	55999736	0	T	A	0.275385	0.996956	36.8957	1.2e-09	-0.0084895	0.00138341	37.6582	8.4e-10	13_55999736_T_A	rs9537160
rs2937342	13	56000387	0	T	G	0.275418	0.997059	36.9329	1.2e-09	-0.00848832	0.00138321	37.659	8.4e-10	13_56000387_T_G	rs9537160
rs11842533	13	56087528	0	G	A	0.721738	0.99754	37.5478	8.9e-10	0.00846085	0.00137883	37.6537	8.4e-10	13_56087528_G_A	rs9537160
rs16850741	2	166330515	0	T	C	0.764091	0.999581	41.4141	1.2e-10	0.00891877	0.0014536	37.6463	8.5e-10	2_166330515_T_C	rs16850592
rs1407237	6	54022700	0	A	G	0.639511	0.99897	41.5001	1.2e-10	-0.00789628	0.00128694	37.6465	8.5e-10	6_54022700_A_G	rs816366
rs2937339	13	55999578	0	T	C	0.275383	0.996953	36.8895	1.3e-09	-0.00848884	0.00138342	37.6523	8.5e-10	13_55999578_T_C	rs9537160
rs2937341	13	55999666	0	T	C	0.275362	0.996796	36.9245	1.2e-09	-0.00848902	0.00138346	37.6518	8.5e-10	13_55999666_T_C	rs9537160
rs2315877	13	56001849	0	A	G	0.275419	0.99706	36.9064	1.2e-09	-0.00848516	0.00138321	37.6306	8.5e-10	13_56001849_A_G	rs9537160
rs2937318	13	56002483	0	G	C	0.27536	0.997352	36.92	1.2e-09	-0.00848568	0.00138309	37.6422	8.5e-10	13_56002483_G_C	rs9537160
rs3013347	13	56004265	0	A	G	0.275414	0.997085	36.9229	1.2e-09	-0.00848673	0.0013832	37.6454	8.5e-10	13_56004265_A_G	rs9537160
rs3013349	13	56004475	0	T	C	0.275361	0.997355	36.9308	1.2e-09	-0.00848689	0.00138308	37.6531	8.5e-10	13_56004475_T_C	rs9537160
rs2315878	13	56004979	0	A	G	0.275414	0.997082	36.9246	1.2e-09	-0.00848686	0.0013832	37.6464	8.5e-10	13_56004979_A_G	rs9537160
rs2315880	13	56006100	0	G	A	0.275413	0.997077	36.9249	1.2e-09	-0.00848694	0.00138321	37.6468	8.5e-10	13_56006100_G_A	rs9537160
rs2860438	13	56006432	0	T	C	0.275413	0.997091	36.9245	1.2e-09	-0.00848683	0.00138321	37.6459	8.5e-10	13_56006432_T_C	rs9537160
rs3013351	13	56006551	0	T	C	0.275413	0.997077	36.925	1.2e-09	-0.00848694	0.00138321	37.6469	8.5e-10	13_56006551_T_C	rs9537160
rs2937327	13	56006980	0	A	G	0.275413	0.997091	36.9245	1.2e-09	-0.00848683	0.00138321	37.6459	8.5e-10	13_56006980_A_G	rs9537160
rs2937328	13	56008041	0	A	T	0.275426	0.997051	36.928	1.2e-09	-0.00848741	0.00138321	37.6506	8.5e-10	13_56008041_A_T	rs9537160
rs2937329	13	56008891	0	A	G	0.275421	0.996893	36.9217	1.2e-09	-0.00848737	0.0013833	37.6454	8.5e-10	13_56008891_A_G	rs9537160
rs4310746	13	56012679	0	A	G	0.275436	0.997457	36.9148	1.2e-09	-0.00848497	0.00138295	37.6431	8.5e-10	13_56012679_A_G	rs9537160
rs11159880	14	27017018	0	T	C	0.751507	0.994284	35.1939	3e-09	0.00878507	0.00143208	37.632	8.5e-10	14_27017018_T_C	rs7140993
rs7156625	14	79942647	0	G	A	0.777941	0.997293	40.1245	2.4e-10	-0.00913323	0.00148877	37.6352	8.5e-10	14_79942647_G_A	rs10136360
rs2240466	7	72856269	0	G	A	0.876952	1	35.8377	2.1e-09	0.0115232	0.00187872	37.62	8.6e-10	7_72856269_G_A	rs33951980
rs3124424	13	55942947	0	A	G	0.267295	0.999821	35.3866	2.7e-09	-0.00854817	0.00139401	37.602	8.7e-10	13_55942947_A_G	rs9537160
rs3013325	13	56010250	0	T	C	0.275036	0.996225	36.9119	1.2e-09	-0.00848898	0.00138433	37.6036	8.7e-10	13_56010250_T_C	rs9537160
rs6706169	2	166281132	0	G	A	0.764704	0.992077	41.0358	1.5e-10	0.00894303	0.00145914	37.5645	8.8e-10	2_166281132_G_A	rs16850592
rs2138037	2	166336096	0	C	A	0.764885	0.999235	41.7752	1e-10	0.00892273	0.00145546	37.5833	8.8e-10	2_166336096_C_A	rs16850592
rs4438496	2	166336696	0	G	A	0.764876	0.999182	41.761	1e-10	0.00892116	0.00145547	37.5693	8.8e-10	2_166336696_G_A	rs16850592
rs6808550	3	25107866	0	A	G	0.427546	0.990469	31.8683	1.6e-08	-0.0076821	0.00125339	37.5654	8.8e-10	3_25107866_A_G	rs7619139
rs10828246	10	21769216	0	T	C	0.640206	0.993043	36.8164	1.3e-09	-0.00792065	0.00129211	37.5773	8.8e-10	10_21769216_T_C	rs7072776
rs1950412	14	27051340	0	A	T	0.753233	0.994181	35.4883	2.6e-09	0.00879981	0.00143573	37.5666	8.8e-10	14_27051340_A_T	rs7140993
rs10807429	6	51503114	0	C	T	0.767999	0.99372	44.2658	2.9e-11	0.00900617	0.00146955	37.5586	8.9e-10	6_51503114_C_T	rs2504671
rs9401452	6	98452680	0	T	C	0.605907	0.998367	39.3465	3.5e-10	0.00775978	0.00126614	37.5606	8.9e-10	6_98452680_T_C	rs9387963
rs9537130	13	56060538	0	T	A	0.722044	0.996703	37.49	9.2e-10	0.00845473	0.00137988	37.5418	8.9e-10	13_56060538_T_A	rs9537160
rs9316805	13	56065479	0	T	A	0.721975	0.997008	37.4966	9.2e-10	0.0084546	0.00137956	37.558	8.9e-10	13_56065479_T_A	rs9537160
rs9597191	13	56067248	0	T	G	0.721975	0.997008	37.4951	9.2e-10	0.00845436	0.00137956	37.5558	8.9e-10	13_56067248_T_G	rs9537160
rs9597192	13	56067285	0	A	G	0.721978	0.996951	37.4902	9.2e-10	0.00845357	0.00137958	37.5481	8.9e-10	13_56067285_A_G	rs9537160
rs9597193	13	56068534	0	T	A	0.721975	0.997008	37.4952	9.2e-10	0.00845437	0.00137956	37.5559	8.9e-10	13_56068534_T_A	rs9537160
rs9537136	13	56069125	0	T	A	0.721974	0.997008	37.4946	9.2e-10	0.00845429	0.00137956	37.5552	8.9e-10	13_56069125_T_A	rs9537160
rs4512991	13	56069467	0	G	T	0.721973	0.996986	37.4886	9.2e-10	0.00845359	0.00137956	37.5492	8.9e-10	13_56069467_G_T	rs9537160
rs2031239	13	99111560	0	C	T	0.708302	0.998589	41.0655	1.5e-10	0.00833167	0.00135964	37.5503	8.9e-10	13_99111560_C_T	rs7334078
rs1950411	14	27051498	0	A	T	0.75323	0.994171	35.4822	2.6e-09	0.00879909	0.00143573	37.5603	8.9e-10	14_27051498_A_T	rs7140993
rs163881	11	30948244	0	T	G	0.328528	0.992823	40.3351	2.1e-10	-0.00807293	0.00131795	37.5204	9e-10	11_30948244_T_G	rs2761589
rs9537127	13	56058712	0	G	A	0.722047	0.996688	37.4839	9.2e-10	0.00845377	0.00137989	37.5327	9e-10	13_56058712_G_A	rs9537160
rs9537129	13	56059739	0	T	C	0.722043	0.996709	37.4892	9.2e-10	0.00845465	0.00137988	37.5412	9e-10	13_56059739_T_C	rs9537160
rs9527399	13	56060325	0	C	G	0.722043	0.996707	37.4884	9.2e-10	0.00845452	0.00137988	37.5399	9e-10	13_56060325_C_G	rs9537160
rs4483748	13	56070559	0	T	G	0.721972	0.996947	37.4754	9.3e-10	0.00845196	0.00137957	37.5345	9e-10	13_56070559_T_G	rs9537160
rs4589432	13	56071095	0	A	G	0.721968	0.996963	37.4593	9.3e-10	0.00845056	0.00137956	37.5222	9e-10	13_56071095_A_G	rs9537160
rs273576	11	30910036	0	A	G	0.327119	0.997376	40.0605	2.5e-10	-0.00806478	0.00131672	37.5145	9.1e-10	11_30910036_A_G	rs2761589
rs273569	11	30914035	0	G	A	0.327133	0.997013	40.0814	2.4e-10	-0.00806623	0.00131693	37.5159	9.1e-10	11_30914035_G_A	rs2761589
rs3013350	13	56005711	0	A	G	0.275334	0.997265	36.7794	1.3e-09	-0.00847209	0.00138319	37.5161	9.1e-10	13_56005711_A_G	rs9537160
rs3013324	13	56010247	0	C	T	0.274989	0.995504	36.7943	1.3e-09	-0.00848146	0.00138494	37.5041	9.1e-10	13_56010247_C_T	rs9537160
rs2012153	3	35779750	0	A	G	0.523532	0.983363	32.6015	1.1e-08	-0.00761388	0.00124366	37.4805	9.2e-10	3_35779750_A_G	rs1513481
rs9375031	6	98415905	0	C	T	0.450983	0.997742	39.7518	2.9e-10	-0.00762177	0.00124469	37.4964	9.2e-10	6_98415905_C_T	rs9387963
rs7797566	7	72896395	0	A	C	0.876573	0.999104	35.7973	2.2e-09	0.0114884	0.00187633	37.489	9.2e-10	7_72896395_A_C	rs33951980
rs111837003	7	72907459	0	C	T	0.876598	0.999134	35.7492	2.2e-09	0.0114875	0.00187645	37.478	9.2e-10	7_72907459_C_T	rs33951980
rs7948834	11	31775396	0	T	C	0.465522	0.993287	37.5775	8.8e-10	-0.0076085	0.00124262	37.4906	9.2e-10	11_31775396_T_C	rs2761589
rs9316800	13	56041457	0	A	T	0.279437	0.997319	37.2738	1e-09	-0.00843266	0.00137732	37.4849	9.2e-10	13_56041457_A_T	rs9537160
rs4526910	13	56060852	0	C	T	0.721974	0.997008	37.4412	9.4e-10	0.00844775	0.00137956	37.4971	9.2e-10	13_56060852_C_T	rs9537160
rs4530017	13	56061007	0	C	T	0.721976	0.997018	37.4395	9.4e-10	0.00844766	0.00137956	37.4964	9.2e-10	13_56061007_C_T	rs9537160
rs9597189	13	56061573	0	C	T	0.721976	0.997018	37.4396	9.4e-10	0.00844767	0.00137956	37.4966	9.2e-10	13_56061573_C_T	rs9537160
rs9597190	13	56061633	0	G	T	0.721976	0.997018	37.4395	9.4e-10	0.00844766	0.00137956	37.4964	9.2e-10	13_56061633_G_T	rs9537160
rs9527401	13	56062812	0	C	T	0.721976	0.997018	37.4403	9.4e-10	0.0084477	0.00137956	37.4969	9.2e-10	13_56062812_C_T	rs9537160
rs9537134	13	56063270	0	T	C	0.721977	0.996982	37.4402	9.4e-10	0.00844771	0.00137956	37.497	9.2e-10	13_56063270_T_C	rs9537160
rs9537135	13	56065037	0	C	T	0.721976	0.997015	37.4393	9.4e-10	0.0084476	0.00137956	37.4959	9.2e-10	13_56065037_C_T	rs9537160
rs9527405	13	56075879	0	C	T	0.721975	0.997016	37.4307	9.5e-10	0.00844691	0.0013795	37.493	9.2e-10	13_56075879_C_T	rs9537160
rs9597194	13	56077759	0	C	T	0.721974	0.997015	37.4209	9.5e-10	0.00844567	0.0013795	37.482	9.2e-10	13_56077759_C_T	rs9537160
rs12877151	13	56078939	0	G	T	0.721974	0.997014	37.4199	9.5e-10	0.00844556	0.0013795	37.481	9.2e-10	13_56078939_G_T	rs9537160
rs9537146	13	56080175	0	T	C	0.721975	0.997018	37.4283	9.5e-10	0.0084466	0.0013795	37.4904	9.2e-10	13_56080175_T_C	rs9537160
rs11638576	15	75260387	0	G	A	0.573307	0.989639	37.4107	9.6e-10	0.00768127	0.00125464	37.4827	9.2e-10	15_75260387_G_A	rs2472297
rs141086701	8	143361458	0	G	A	0.991838	0.868294	47.8035	4.7e-12	0.0449508	0.00734433	37.4603	9.3e-10	8_143361458_G_A	rs141086701
rs273612	11	30903063	0	G	A	0.326805	0.99738	40.1053	2.4e-10	-0.00806265	0.00131714	37.4709	9.3e-10	11_30903063_G_A	rs2761589
rs273603	11	30931904	0	C	T	0.328358	0.994336	40.3912	2.1e-10	-0.00806209	0.001317	37.4732	9.3e-10	11_30931904_C_T	rs2761589
rs273610	11	30938218	0	G	A	0.328909	0.994102	40.3494	2.1e-10	-0.00805914	0.00131685	37.4547	9.4e-10	11_30938218_G_A	rs2761589
rs3105082	13	55954016	0	T	C	0.267154	0.999245	35.2326	2.9e-09	-0.00853533	0.00139465	37.4552	9.4e-10	13_55954016_T_C	rs9537160
rs4329802	13	56056983	0	G	A	0.279315	0.996941	37.2635	1e-09	-0.00843135	0.00137771	37.4523	9.4e-10	13_56056983_G_A	rs9537160
rs9537140	13	56073197	0	G	A	0.721971	0.996922	37.3858	9.7e-10	0.00844162	0.0013796	37.4409	9.4e-10	13_56073197_G_A	rs9537160
rs9537141	13	56074255	0	C	T	0.721951	0.997018	37.3941	9.7e-10	0.00844231	0.00137949	37.453	9.4e-10	13_56074255_C_T	rs9537160
rs1245192	14	26919218	0	G	A	0.248773	0.986048	35.2561	2.9e-09	-0.00880005	0.00143823	37.438	9.4e-10	14_26919218_G_A	rs7140993
rs11159900	14	27051370	0	T	C	0.248795	0.995271	34.7661	3.7e-09	-0.00876296	0.001432	37.447	9.4e-10	14_27051370_T_C	rs7140993
rs9537143	13	56075149	0	T	C	0.721954	0.997015	37.377	9.7e-10	0.00844006	0.0013795	37.4324	9.5e-10	13_56075149_T_C	rs9537160
rs9591662	13	56086127	0	T	C	0.721901	0.997438	37.3899	9.7e-10	0.008437	0.00137911	37.4265	9.5e-10	13_56086127_T_C	rs9537160
rs178171	14	27013841	0	C	T	0.248936	0.995183	34.8151	3.6e-09	-0.00875746	0.0014317	37.4154	9.5e-10	14_27013841_C_T	rs7140993
rs10740997	10	22269847	0	T	C	0.256918	0.994803	37.3598	9.8e-10	0.0086699	0.00141769	37.3996	9.6e-10	10_22269847_T_C	rs7072776
rs273572	11	30911742	0	C	T	0.327195	0.997443	39.9659	2.6e-10	-0.00805344	0.00131668	37.4113	9.6e-10	11_30911742_C_T	rs2761589
rs4347503	13	56050209	0	A	G	0.279455	0.99731	37.1854	1.1e-09	-0.008424	0.0013773	37.4093	9.6e-10	13_56050209_A_G	rs9537160
rs7985302	13	56052560	0	G	A	0.279418	0.996992	37.2193	1.1e-09	-0.00842642	0.0013776	37.4143	9.6e-10	13_56052560_G_A	rs9537160
rs7337153	13	56057188	0	C	G	0.279374	0.997072	37.1744	1.1e-09	-0.00842533	0.00137759	37.4052	9.6e-10	13_56057188_C_G	rs9537160
rs11619093	13	56082890	0	T	C	0.721946	0.997153	37.3447	9.9e-10	0.00843647	0.00137936	37.4084	9.6e-10	13_56082890_T_C	rs9537160
rs778767	2	61787028	0	C	G	0.387743	0.997731	37.9513	7.3e-10	-0.00775713	0.00126853	37.3939	9.7e-10	2_61787028_C_G	rs1562308
rs273579	11	30908049	0	T	C	0.327167	0.997786	39.9129	2.7e-10	-0.00804898	0.00131649	37.3806	9.7e-10	11_30908049_T_C	rs2761589
rs273573	11	30910991	0	A	C	0.327171	0.997535	39.9265	2.6e-10	-0.00805003	0.00131664	37.3819	9.7e-10	11_30910991_A_C	rs2761589
rs3013331	13	56015214	0	G	A	0.275407	0.997795	36.7212	1.4e-09	-0.00845571	0.00138281	37.3915	9.7e-10	13_56015214_G_A	rs9537160
rs3013332	13	56015407	0	T	C	0.275428	0.99793	36.6816	1.4e-09	-0.00845457	0.00138277	37.3839	9.7e-10	13_56015407_T_C	rs9537160
rs3013333	13	56015537	0	A	G	0.275409	0.997829	36.7235	1.4e-09	-0.00845523	0.00138279	37.3886	9.7e-10	13_56015537_A_G	rs9537160
rs273571	11	30911936	0	C	G	0.327178	0.997434	39.9158	2.7e-10	-0.00804883	0.0013167	37.3674	9.8e-10	11_30911936_C_G	rs2761589
rs9537115	13	56013195	0	C	T	0.275421	0.997447	36.6931	1.4e-09	-0.00845408	0.00138303	37.3654	9.8e-10	13_56013195_C_T	rs9537160
rs7337707	13	56056774	0	T	C	0.27937	0.997076	37.1328	1.1e-09	-0.00842163	0.00137759	37.3725	9.8e-10	13_56056774_T_C	rs9537160
rs7328318	13	56083901	0	G	C	0.721937	0.997257	37.2952	1e-09	0.00843019	0.00137927	37.3571	9.8e-10	13_56083901_G_C	rs9537160
rs1848969	12	78793940	0	G	C	0.597575	0.993207	40.1924	2.3e-10	0.00772838	0.00126476	37.339	9.9e-10	12_78793940_G_C	rs12581220
rs2315881	13	56010122	0	G	A	0.275393	0.996938	36.65	1.4e-09	-0.00845307	0.00138336	37.3386	9.9e-10	13_56010122_G_A	rs9537160
rs4255683	13	56012583	0	C	T	0.275407	0.99764	36.6303	1.4e-09	-0.00845109	0.00138299	37.341	9.9e-10	13_56012583_C_T	rs9537160
rs4531618	13	56012737	0	A	G	0.275397	0.997615	36.644	1.4e-09	-0.00845233	0.00138303	37.35	9.9e-10	13_56012737_A_G	rs9537160
rs2316090	13	56014105	0	G	T	0.275399	0.997644	36.6867	1.4e-09	-0.00845171	0.00138295	37.3488	9.9e-10	13_56014105_G_T	rs9537160
rs2305156	2	61729268	0	T	C	0.400277	0.995003	39.2907	3.7e-10	-0.00770628	0.00126284	37.2387	1e-09	2_61729268_T_C	rs1562308
rs12616299	2	166284377	0	T	C	0.764646	0.99277	40.8525	1.6e-10	0.00891102	0.00145848	37.3296	1e-09	2_166284377_T_C	rs16850592
rs16850739	2	166330301	0	T	A	0.763989	0.99952	40.8983	1.6e-10	0.00886938	0.00145344	37.2383	1e-09	2_166330301_T_A	rs16850592
rs77960	5	103964585	0	G	A	0.671751	0.993648	32.1747	1.4e-08	-0.00803914	0.00131741	37.2371	1e-09	5_103964585_G_A	rs40465
rs17777730	5	148098163	0	C	T	0.741294	0.99636	37.7454	8.1e-10	0.00863168	0.00141393	37.2678	1e-09	5_148098163_C_T	rs13163314
rs6935884	6	98416581	0	A	C	0.450926	0.997979	39.6081	3.1e-10	-0.00759847	0.00124456	37.2755	1e-09	6_98416581_A_C	rs9387963
rs4576255	6	98509656	0	T	G	0.606459	0.99915	39.5161	3.3e-10	0.00773298	0.00126611	37.3036	1e-09	6_98509656_T_G	rs9387963
rs13216075	6	98522436	0	C	G	0.606492	0.999236	39.5248	3.2e-10	0.0077304	0.00126611	37.2788	1e-09	6_98522436_C_G	rs9387963
rs62422661	6	98545611	0	G	T	0.606823	1	39.508	3.3e-10	0.00773153	0.00126658	37.2621	1e-09	6_98545611_G_T	rs9387963
rs10761731	10	65027610	0	A	T	0.581753	1	38.3621	5.9e-10	0.00765625	0.00125417	37.2668	1e-09	10_65027610_A_T	rs7924036
rs1015541	11	30854905	0	T	G	0.32752	0.991637	39.9233	2.6e-10	-0.00806088	0.00131949	37.3211	1e-09	11_30854905_T_G	rs2761589
rs1223114	11	31523130	0	A	G	0.390938	0.995125	36.4685	1.6e-09	-0.00773866	0.00126765	37.2675	1e-09	11_31523130_A_G	rs2761589
rs2937334	13	56011582	0	G	A	0.275391	0.997357	36.6414	1.4e-09	-0.00845063	0.00138313	37.3297	1e-09	13_56011582_G_A	rs9537160
rs2937335	13	56011656	0	G	A	0.275379	0.997412	36.5643	1.5e-09	-0.00844058	0.00138311	37.2418	1e-09	13_56011656_G_A	rs9537160
rs3013327	13	56011718	0	C	G	0.275384	0.997302	36.5614	1.5e-09	-0.00844034	0.00138309	37.2406	1e-09	13_56011718_C_G	rs9537160
rs3013328	13	56011726	0	A	C	0.275384	0.997302	36.5614	1.5e-09	-0.00844034	0.00138309	37.2406	1e-09	13_56011726_A_C	rs9537160
rs4264285	13	56012483	0	C	T	0.275408	0.997631	36.5904	1.5e-09	-0.00844664	0.001383	37.3014	1e-09	13_56012483_C_T	rs9537160
rs2316091	13	56017062	0	A	G	0.275018	0.996304	36.6412	1.4e-09	-0.00845255	0.00138444	37.2757	1e-09	13_56017062_A_G	rs9537160
rs2316092	13	56017074	0	G	A	0.274992	0.996003	36.6348	1.4e-09	-0.00844783	0.00138449	37.2314	1e-09	13_56017074_G_A	rs9537160
rs2316093	13	56017092	0	T	G	0.274999	0.99598	36.6379	1.4e-09	-0.00844839	0.00138451	37.2356	1e-09	13_56017092_T_G	rs9537160
rs3013341	13	56024945	0	G	T	0.279517	0.997169	37.1404	1.1e-09	-0.00841444	0.00137738	37.3203	1e-09	13_56024945_G_T	rs9537160
rs12588828	14	27063793	0	G	C	0.248878	0.993686	34.6819	3.9e-09	-0.0087514	0.00143297	37.2975	1e-09	14_27063793_G_C	rs7140993
rs4442732	14	61025617	0	A	G	0.377013	0.9976	36.4809	1.5e-09	-0.00779507	0.0012767	37.2786	1e-09	14_61025617_A_G	rs4442732
rs2370982	14	79890677	0	C	T	0.7853	0.982323	39.6819	3e-10	-0.00926183	0.00151679	37.2857	1e-09	14_79890677_C_T	rs10136360
rs780092	2	27743154	0	A	G	0.839682	1	33.7965	6.1e-09	0.0102413	0.00168166	37.0881	1.1e-09	2_27743154_A_G	rs1260326
rs2305155	2	61729258	0	A	G	0.400609	0.994816	39.1067	4e-10	-0.00769918	0.00126277	37.1742	1.1e-09	2_61729258_A_G	rs1562308
rs10779948	2	61844160	0	T	C	0.392602	0.985604	40.5976	1.9e-10	-0.00774623	0.00127239	37.0631	1.1e-09	2_61844160_T_C	rs1562308
rs4667812	2	166254401	0	T	G	0.754857	1	41.1079	1.4e-10	0.00874748	0.00143488	37.1648	1.1e-09	2_166254401_T_G	rs16850592
rs714534	5	148097341	0	T	C	0.73905	0.996721	37.7991	7.8e-10	0.00859946	0.00140976	37.2094	1.1e-09	5_148097341_T_C	rs13163314
rs12212034	6	51492862	0	C	T	0.651954	0.994388	35.1824	3e-09	0.00793363	0.00130202	37.1284	1.1e-09	6_51492862_C_T	rs2504671
rs13215227	6	98506764	0	T	C	0.606414	0.999263	39.4026	3.4e-10	0.00772241	0.00126601	37.2076	1.1e-09	6_98506764_T_C	rs9387963
rs4839938	6	98507430	0	C	T	0.6064	0.999255	39.3202	3.6e-10	0.00770683	0.00126603	37.0562	1.1e-09	6_98507430_C_T	rs9387963
rs4839939	6	98507832	0	A	C	0.606416	0.999194	39.3415	3.6e-10	0.00771568	0.00126603	37.1414	1.1e-09	6_98507832_A_C	rs9387963
rs55731746	6	98514302	0	G	A	0.606461	0.999328	39.3373	3.6e-10	0.00771452	0.00126602	37.1309	1.1e-09	6_98514302_G_A	rs9387963
rs4401671	6	98519911	0	T	G	0.606397	0.999164	39.425	3.4e-10	0.00772288	0.00126607	37.2088	1.1e-09	6_98519911_T_G	rs9387963
rs35062457	6	98522698	0	T	C	0.606435	0.999231	39.4429	3.4e-10	0.00772078	0.00126605	37.1896	1.1e-09	6_98522698_T_C	rs9387963
rs9388083	6	98525726	0	C	T	0.606466	0.999322	39.4107	3.4e-10	0.00771728	0.00126605	37.1556	1.1e-09	6_98525726_C_T	rs9387963
rs901630	6	98539519	0	C	T	0.60652	0.999146	39.4357	3.4e-10	0.00771815	0.0012663	37.1497	1.1e-09	6_98539519_C_T	rs9387963
rs968050	6	98574560	0	C	T	0.517364	0.999794	39.4083	3.4e-10	0.0075605	0.00123972	37.1926	1.1e-09	6_98574560_C_T	rs9387963
rs12202969	6	98576223	0	G	A	0.517335	0.999496	39.4628	3.3e-10	0.00756351	0.00123989	37.2119	1.1e-09	6_98576223_G_A	rs9387963
rs9372734	6	98577689	0	C	T	0.517368	0.999541	39.401	3.5e-10	0.00756042	0.00123986	37.1835	1.1e-09	6_98577689_C_T	rs9387963
rs34539692	6	126747110	0	A	C	0.686865	0.996722	36.1128	1.9e-09	-0.00812495	0.00133391	37.1012	1.1e-09	6_126747110_A_C	rs10457480
rs7098181	10	65027143	0	G	T	0.58264	0.999934	38.4344	5.7e-10	0.00764744	0.00125448	37.1624	1.1e-09	10_65027143_G_T	rs7924036
rs9787438	10	65038030	0	G	C	0.582599	0.999918	38.3669	5.9e-10	0.00764172	0.00125447	37.1076	1.1e-09	10_65038030_G_C	rs7924036
rs7080386	10	65048306	0	C	A	0.584666	1	38.2181	6.3e-10	0.00764837	0.00125513	37.133	1.1e-09	10_65048306_C_A	rs7924036
rs2312068	11	30855691	0	G	A	0.32762	0.991705	39.6363	3.1e-10	-0.00803845	0.0013193	37.1242	1.1e-09	11_30855691_G_A	rs2761589
rs163886	11	30943561	0	T	A	0.328317	0.99318	39.9303	2.6e-10	-0.00802296	0.00131777	37.0674	1.1e-09	11_30943561_T_A	rs2761589
rs1984389	11	31740989	0	A	C	0.462496	0.995338	37.3107	1e-09	-0.00757112	0.00124223	37.1462	1.1e-09	11_31740989_A_C	rs2761589
rs11109480	12	78748322	0	C	T	0.557649	0.984919	44.5212	2.5e-11	0.00764169	0.00125343	37.1688	1.1e-09	12_78748322_C_T	rs12581220
rs12872990	13	55952684	0	A	G	0.292366	0.911977	35.5478	2.5e-09	-0.00866656	0.00142262	37.1122	1.1e-09	13_55952684_A_G	rs9537160
rs3013340	13	56000038	0	A	T	0.290981	0.986491	38.1109	6.7e-10	-0.00834528	0.00136799	37.2146	1.1e-09	13_56000038_A_T	rs9537160
rs2937330	13	56009212	0	C	G	0.275638	0.995194	36.4365	1.6e-09	-0.00843144	0.00138427	37.0989	1.1e-09	13_56009212_C_G	rs9537160
rs4534718	13	56012550	0	G	A	0.275484	0.997572	36.3921	1.6e-09	-0.00842539	0.00138291	37.1184	1.1e-09	13_56012550_G_A	rs9537160
rs178169	14	27019244	0	G	A	0.249464	0.99466	34.6739	3.9e-09	-0.00872216	0.00143105	37.1483	1.1e-09	14_27019244_G_A	rs7140993
rs178159	14	27037118	0	C	T	0.24919	0.995001	34.5213	4.2e-09	-0.00872757	0.00143133	37.1798	1.1e-09	14_27037118_C_T	rs7140993
rs12323384	14	27057492	0	T	C	0.751545	0.99342	34.5647	4.1e-09	0.00872922	0.00143283	37.1159	1.1e-09	14_27057492_T_C	rs7140993
rs1955695	14	61021891	0	A	G	0.376875	0.997664	36.3244	1.7e-09	-0.00777672	0.00127684	37.0957	1.1e-09	14_61021891_A_G	rs4442732
rs8008910	14	79944099	0	G	A	0.777605	0.997087	39.7063	3e-10	-0.00908013	0.00148828	37.2233	1.1e-09	14_79944099_G_A	rs10136360
rs62132800	19	49266806	0	C	T	0.903546	0.942566	31.8126	1.7e-08	-0.0130749	0.00214638	37.108	1.1e-09	19_49266806_C_T	rs838133
rs12713437	2	61722904	0	C	T	0.400284	0.996589	39.1781	3.9e-10	-0.00767899	0.00126177	37.0382	1.2e-09	2_61722904_C_T	rs1562308
rs6718887	2	61727215	0	G	A	0.400573	0.996707	38.8758	4.5e-10	-0.00767004	0.00126157	36.9634	1.2e-09	2_61727215_G_A	rs1562308
rs11125885	2	61755728	0	G	C	0.398805	0.998334	38.9886	4.3e-10	-0.00767156	0.00126158	36.9777	1.2e-09	2_61755728_G_C	rs1562308
rs10186325	2	61757721	0	G	T	0.399119	0.99826	38.9418	4.4e-10	-0.00767023	0.00126138	36.9762	1.2e-09	2_61757721_G_T	rs1562308
rs10930168	2	166353571	0	C	T	0.764589	0.999161	41	1.5e-10	0.00885436	0.00145462	37.0523	1.2e-09	2_166353571_C_T	rs16850592
rs10497262	2	166355761	0	G	A	0.765537	0.99985	40.933	1.6e-10	0.00885775	0.00145652	36.984	1.2e-09	2_166355761_G_A	rs16850592
rs9370040	6	51492164	0	T	A	0.652061	0.994506	34.9157	3.4e-09	0.00791919	0.00130202	36.9933	1.2e-09	6_51492164_T_A	rs2504671
rs9401501	6	98500712	0	T	C	0.606393	0.999222	39.142	3.9e-10	0.00769467	0.00126601	36.9405	1.2e-09	6_98500712_T_C	rs9387963
rs9388090	6	98527087	0	C	T	0.60649	0.999268	39.217	3.8e-10	0.00769923	0.00126614	36.9771	1.2e-09	6_98527087_C_T	rs9387963
rs12206087	6	98582900	0	G	A	0.517329	0.999458	39.1749	3.9e-10	0.00753827	0.00123986	36.9658	1.2e-09	6_98582900_G_A	rs9387963
rs2388334	6	98591622	0	A	G	0.517312	0.998382	39.1229	4e-10	0.0075364	0.00124046	36.9118	1.2e-09	6_98591622_A_G	rs9387963
rs147422283	8	143366869	0	G	A	0.99182	0.86988	47.2612	6.2e-12	0.044565	0.00732974	36.9667	1.2e-09	8_143366869_G_A	rs141086701
rs2666771	10	22148230	0	T	C	0.288848	0.997315	38.9431	4.4e-10	0.00830476	0.00136477	37.0283	1.2e-09	10_22148230_T_C	rs7072776
rs7088799	10	65016174	0	T	G	0.582504	0.999545	38.177	6.5e-10	0.00763163	0.00125463	36.9999	1.2e-09	10_65016174_T_G	rs7924036
rs546181	11	30855237	0	G	T	0.326685	0.993722	39.5624	3.2e-10	-0.00801644	0.00131967	36.9005	1.2e-09	11_30855237_G_T	rs2761589
rs273617	11	30895612	0	T	C	0.327583	0.996529	39.3198	3.6e-10	-0.0080055	0.00131683	36.9586	1.2e-09	11_30895612_T_C	rs2761589
rs762972	11	31797603	0	A	G	0.356421	0.984921	39.5647	3.2e-10	-0.00789668	0.00129985	36.9065	1.2e-09	11_31797603_A_G	rs2761589
rs2937333	13	56011256	0	G	A	0.275456	0.997164	36.3308	1.7e-09	-0.00841555	0.0013832	37.0167	1.2e-09	13_56011256_G_A	rs9537160
rs3013326	13	56011335	0	C	G	0.274081	0.99002	36.1401	1.8e-09	-0.00845331	0.0013904	36.9638	1.2e-09	13_56011335_C_G	rs9537160
rs4374060	13	56065207	0	G	C	0.279172	0.997259	36.7771	1.3e-09	-0.00838012	0.00137767	37.0006	1.2e-09	13_56065207_G_C	rs9537160
rs7358989	13	56065748	0	G	A	0.279165	0.997265	36.7328	1.4e-09	-0.00837587	0.00137767	36.963	1.2e-09	13_56065748_G_A	rs9537160
rs7985495	13	56066529	0	T	G	0.279223	0.997382	36.6546	1.4e-09	-0.00837093	0.00137755	36.9259	1.2e-09	13_56066529_T_G	rs9537160
rs34140722	13	56069305	0	T	C	0.27917	0.997288	36.7872	1.3e-09	-0.00838093	0.00137767	37.0079	1.2e-09	13_56069305_T_C	rs9537160
rs9537144	13	56076453	0	G	A	0.279184	0.997159	36.71	1.4e-09	-0.00837305	0.00137763	36.9403	1.2e-09	13_56076453_G_A	rs9537160
rs7999449	13	56078415	0	C	T	0.279235	0.997382	36.6714	1.4e-09	-0.00837232	0.00137749	36.9416	1.2e-09	13_56078415_C_T	rs9537160
rs3783005	13	99111337	0	A	T	0.706954	0.998933	40.3777	2.1e-10	0.00825355	0.0013575	36.9661	1.2e-09	13_99111337_A_T	rs7334078
rs1951074	14	27030207	0	T	C	0.751301	0.993178	34.4916	4.3e-09	0.0087103	0.00143256	36.9693	1.2e-09	14_27030207_T_C	rs7140993
rs28479795	14	79943606	0	C	T	0.778423	0.996241	39.466	3.3e-10	-0.00906113	0.00149123	36.9213	1.2e-09	14_79943606_C_T	rs10136360
rs12975781	19	49249698	0	C	T	0.610531	0.989422	24.6033	7e-07	-0.00773888	0.00127331	36.9395	1.2e-09	19_49249698_C_T	rs838133
rs6545872	2	61724568	0	G	A	0.400497	0.996437	38.9149	4.4e-10	-0.00766009	0.0012618	36.8539	1.3e-09	2_61724568_G_A	rs1562308
rs766447	2	61735569	0	C	T	0.398678	0.997808	38.7495	4.8e-10	-0.00766	0.00126195	36.8443	1.3e-09	2_61735569_C_T	rs1562308
rs7557230	2	61736652	0	A	T	0.398407	0.997966	38.8081	4.7e-10	-0.00766011	0.00126201	36.8422	1.3e-09	2_61736652_A_T	rs1562308
rs6707830	2	61749472	0	G	A	0.399178	0.998787	38.7836	4.7e-10	-0.007651	0.00126114	36.8051	1.3e-09	2_61749472_G_A	rs1562308
rs3771260	2	61762384	0	G	T	0.398954	0.999014	38.5776	5.3e-10	-0.00764624	0.00126105	36.7646	1.3e-09	2_61762384_G_T	rs1562308
rs7606277	2	100929526	0	A	T	0.356788	0.993281	37.2447	1e-09	0.00783877	0.00129141	36.844	1.3e-09	2_100929526_A_T	rs1437971
rs12468128	2	166222685	0	T	G	0.755049	1	40.4576	2e-10	0.00870797	0.00143603	36.7713	1.3e-09	2_166222685_T_G	rs16850592
rs12464010	2	166222858	0	C	T	0.755246	0.999978	40.469	2e-10	0.00870719	0.00143586	36.7731	1.3e-09	2_166222858_C_T	rs16850592
rs12467383	2	166225769	0	G	A	0.755227	0.999958	40.5044	2e-10	0.00871099	0.00143584	36.8062	1.3e-09	2_166225769_G_A	rs16850592
rs2304013	2	166227050	0	T	G	0.755103	0.999952	40.4021	2.1e-10	0.0087027	0.00143552	36.7525	1.3e-09	2_166227050_T_G	rs16850592
rs1991774	2	166227490	0	A	C	0.75523	0.999958	40.5394	1.9e-10	0.0087147	0.00143584	36.8377	1.3e-09	2_166227490_A_C	rs16850592
rs1864885	2	166234076	0	A	G	0.755235	0.999896	40.5252	1.9e-10	0.00871511	0.00143588	36.8391	1.3e-09	2_166234076_A_G	rs16850592
rs74822612	2	166330486	0	T	C	0.763424	0.998616	40.4891	2e-10	0.00882065	0.00145271	36.8675	1.3e-09	2_166330486_T_C	rs16850592
rs7560584	2	166352178	0	C	T	0.764512	0.998987	40.6852	1.8e-10	0.00882658	0.00145439	36.8316	1.3e-09	2_166352178_C_T	rs16850592
rs12468165	2	166357156	0	C	T	0.765376	0.999776	40.622	1.8e-10	0.00882729	0.0014563	36.7413	1.3e-09	2_166357156_C_T	rs16850592
rs12629972	3	25121444	0	T	C	0.411934	0.991706	31.6514	1.8e-08	-0.00764017	0.00125966	36.7873	1.3e-09	3_25121444_T_C	rs7619139
rs1417391	6	54071413	0	C	T	0.352883	0.98796	41.8335	9.9e-11	0.00788639	0.00129921	36.8465	1.3e-09	6_54071413_C_T	rs816366
rs4363043	6	98403022	0	C	T	0.450631	0.995914	39.3074	3.6e-10	-0.00756457	0.00124559	36.8826	1.3e-09	6_98403022_C_T	rs9387963
rs9398676	6	98526943	0	C	T	0.606478	0.999234	39.021	4.2e-10	0.00768106	0.00126614	36.8029	1.3e-09	6_98526943_C_T	rs9387963
rs12176311	6	98529166	0	C	T	0.606499	0.999307	39.1327	4e-10	0.00768943	0.00126614	36.8828	1.3e-09	6_98529166_C_T	rs9387963
rs9385269	6	98547979	0	C	T	0.475105	0.990216	40.3491	2.1e-10	0.0075611	0.0012458	36.8359	1.3e-09	6_98547979_C_T	rs9387963
rs11012794	10	22105035	0	A	G	0.292953	0.992317	33.2832	8e-09	0.00826845	0.00136284	36.8093	1.3e-09	10_22105035_A_G	rs7072776
rs10764328	10	22271669	0	C	A	0.291329	0.991816	35.6641	2.3e-09	0.00827599	0.00136534	36.7414	1.3e-09	10_22271669_C_A	rs7072776
rs7075508	10	22273531	0	C	T	0.281126	0.992143	35.3811	2.7e-09	0.00836777	0.00138026	36.7537	1.3e-09	10_22273531_C_T	rs7072776
rs7075195	10	65050659	0	A	G	0.582336	0.999323	38.04	6.9e-10	0.00761887	0.00125478	36.8678	1.3e-09	10_65050659_A_G	rs7924036
rs7084707	10	65052542	0	C	T	0.582542	0.9999	38.0277	7e-10	0.00761195	0.00125446	36.8193	1.3e-09	10_65052542_C_T	rs7924036
rs7073753	10	65062820	0	C	T	0.582521	0.999835	38.0867	6.8e-10	0.00760655	0.00125451	36.7644	1.3e-09	10_65062820_C_T	rs7924036
rs7090111	10	65077994	0	C	G	0.582505	0.999773	38.1757	6.5e-10	0.00761293	0.00125449	36.8274	1.3e-09	10_65077994_C_G	rs7924036
rs604672	11	30853226	0	C	G	0.326595	0.993397	39.4737	3.3e-10	-0.00800272	0.00131988	36.7625	1.3e-09	11_30853226_C_G	rs2761589
rs2021806	11	30853618	0	A	G	0.327644	0.991617	39.3544	3.5e-10	-0.00800378	0.00131934	36.8024	1.3e-09	11_30853618_A_G	rs2761589
rs686901	11	30854334	0	G	C	0.326332	0.993349	39.6827	3e-10	-0.0080174	0.00132041	36.8679	1.3e-09	11_30854334_G_C	rs2761589
rs7127215	11	30858131	0	A	G	0.327607	0.991724	39.3386	3.6e-10	-0.00800028	0.0013193	36.7723	1.3e-09	11_30858131_A_G	rs2761589
rs1375378	11	30859389	0	T	C	0.327614	0.9917	39.308	3.6e-10	-0.00799732	0.00131932	36.7444	1.3e-09	11_30859389_T_C	rs2761589
rs1823306	11	30859760	0	A	G	0.327604	0.991673	39.3095	3.6e-10	-0.00799818	0.00131934	36.7508	1.3e-09	11_30859760_A_G	rs2761589
rs2122135	11	30860112	0	C	T	0.327619	0.99168	39.3024	3.6e-10	-0.00799706	0.00131932	36.7417	1.3e-09	11_30860112_C_T	rs2761589
rs10767877	11	30860580	0	A	G	0.327902	0.991706	39.3409	3.6e-10	-0.00799618	0.00131907	36.7476	1.3e-09	11_30860580_A_G	rs2761589
rs612171	11	30893425	0	G	A	0.327665	0.99676	39.1645	3.9e-10	-0.00798927	0.00131669	36.8168	1.3e-09	11_30893425_G_A	rs2761589
rs273616	11	30896283	0	C	T	0.327672	0.996767	39.1611	3.9e-10	-0.00799045	0.00131667	36.8287	1.3e-09	11_30896283_C_T	rs2761589
rs273615	11	30899836	0	A	C	0.327622	0.997144	39.095	4e-10	-0.00798262	0.00131649	36.7671	1.3e-09	11_30899836_A_C	rs2761589
rs273604	11	30966112	0	G	A	0.328555	0.989728	39.1328	4e-10	-0.00801626	0.00132038	36.8594	1.3e-09	11_30966112_G_A	rs2761589
rs4885889	13	56084576	0	A	G	0.279231	0.997592	36.6272	1.4e-09	-0.00836143	0.00137728	36.8569	1.3e-09	13_56084576_A_G	rs9537160
rs35268045	13	56088127	0	G	A	0.730535	0.998603	36.6417	1.4e-09	0.00844393	0.00139119	36.8396	1.3e-09	13_56088127_G_A	rs9537160
rs4536353	13	56089638	0	A	C	0.730542	0.998671	36.595	1.5e-09	0.0084397	0.00139118	36.8035	1.3e-09	13_56089638_A_C	rs9537160
rs9597198	13	56095385	0	C	A	0.730525	0.998641	36.67	1.4e-09	0.00844715	0.00139118	36.8684	1.3e-09	13_56095385_C_A	rs9537160
rs4296148	13	56095646	0	A	G	0.73053	0.998665	36.6583	1.4e-09	0.00844567	0.00139117	36.856	1.3e-09	13_56095646_A_G	rs9537160
rs67100646	13	56098383	0	A	T	0.730515	0.998642	36.656	1.4e-09	0.00844728	0.00139117	36.8702	1.3e-09	13_56098383_A_T	rs9537160
rs9597199	13	56098572	0	C	G	0.730529	0.998645	36.6368	1.4e-09	0.00844447	0.00139117	36.8453	1.3e-09	13_56098572_C_G	rs9537160
rs11843439	13	56100010	0	C	A	0.730529	0.99865	36.6399	1.4e-09	0.00844476	0.00139117	36.848	1.3e-09	13_56100010_C_A	rs9537160
rs11843441	13	56100090	0	C	G	0.730532	0.998642	36.6349	1.4e-09	0.00844397	0.00139118	36.8404	1.3e-09	13_56100090_C_G	rs9537160
rs4133211	13	56100196	0	T	A	0.730529	0.99865	36.6399	1.4e-09	0.00844476	0.00139117	36.848	1.3e-09	13_56100196_T_A	rs9537160
rs7993689	13	56101908	0	A	G	0.730528	0.998648	36.6276	1.4e-09	0.00844324	0.00139117	36.8346	1.3e-09	13_56101908_A_G	rs9537160
rs9537164	13	56115403	0	G	A	0.730625	0.998314	36.4984	1.5e-09	0.00843571	0.0013916	36.7461	1.3e-09	13_56115403_G_A	rs9537160
rs7994036	13	56116304	0	G	A	0.730622	0.9983	36.517	1.5e-09	0.00843729	0.00139161	36.7596	1.3e-09	13_56116304_G_A	rs9537160
rs9537166	13	56117934	0	A	G	0.730554	0.998664	36.5544	1.5e-09	0.00843802	0.00139124	36.7858	1.3e-09	13_56117934_A_G	rs9537160
rs17111369	14	27021647	0	T	C	0.751107	0.992662	34.3316	4.6e-09	0.00869485	0.00143257	36.8374	1.3e-09	14_27021647_T_C	rs7140993
rs111908763	14	79932823	0	C	T	0.799322	0.993951	39.9996	2.5e-10	-0.00938607	0.00154677	36.8229	1.3e-09	14_79932823_C_T	rs10136360
rs12900072	15	75307148	0	G	A	0.526376	0.998646	36.6514	1.4e-09	0.00751497	0.00123883	36.7986	1.3e-09	15_75307148_G_A	rs2472297
rs12713438	2	61725501	0	G	A	0.400672	0.996798	38.6435	5.1e-10	-0.00764288	0.00126145	36.7094	1.4e-09	2_61725501_G_A	rs1562308
rs12713439	2	61752154	0	G	A	0.398214	0.998131	38.7475	4.8e-10	-0.00763556	0.00126195	36.6099	1.4e-09	2_61752154_G_A	rs1562308
rs7421663	2	61753786	0	C	T	0.39839	0.998056	38.7916	4.7e-10	-0.00763998	0.00126191	36.6546	1.4e-09	2_61753786_C_T	rs1562308
rs9989864	2	61761637	0	G	A	0.398945	0.998943	38.5124	5.4e-10	-0.00763822	0.00126109	36.6856	1.4e-09	2_61761637_G_A	rs1562308
rs3771261	2	61762161	0	A	G	0.398947	0.998964	38.505	5.5e-10	-0.00763749	0.00126107	36.6792	1.4e-09	2_61762161_A_G	rs1562308
rs6744911	2	166208049	0	A	G	0.753362	0.999266	40.1589	2.3e-10	0.00867795	0.00143215	36.7161	1.4e-09	2_166208049_A_G	rs16850592
rs1432544	2	166291814	0	T	C	0.764713	0.989863	40.1812	2.3e-10	0.00884651	0.00146021	36.704	1.4e-09	2_166291814_T_C	rs16850592
rs16850814	2	166365545	0	T	C	0.765128	1	40.8633	1.6e-10	0.00882584	0.00145642	36.723	1.4e-09	2_166365545_T_C	rs16850592
rs12632128	3	25103258	0	G	T	0.436927	0.987642	30.304	3.7e-08	-0.00757976	0.00125153	36.6798	1.4e-09	3_25103258_G_T	rs7619139
rs13176278	5	148109960	0	C	T	0.740747	0.994871	37.6702	8.4e-10	0.00856426	0.00141362	36.7043	1.4e-09	5_148109960_C_T	rs13163314
rs1327259	6	51177811	0	A	G	0.612675	0.991607	36.0761	1.9e-09	0.00771316	0.00127403	36.6527	1.4e-09	6_51177811_A_G	rs2504671
rs12192780	6	51508011	0	T	G	0.651401	0.993974	34.5189	4.2e-09	0.00788271	0.00130172	36.6703	1.4e-09	6_51508011_T_G	rs2504671
rs4458695	6	98528404	0	G	A	0.606481	0.99922	38.8674	4.5e-10	0.00766495	0.00126618	36.646	1.4e-09	6_98528404_G_A	rs9387963
rs901628	6	98539377	0	C	G	0.606712	0.998789	38.9824	4.3e-10	0.00766998	0.00126663	36.668	1.4e-09	6_98539377_C_G	rs9387963
rs901629	6	98539379	0	C	T	0.606736	0.998692	38.966	4.3e-10	0.00766856	0.00126671	36.6501	1.4e-09	6_98539379_C_T	rs9387963
rs80189144	7	72939939	0	T	C	0.876882	0.997764	34.9452	3.4e-09	0.0113899	0.00187948	36.7254	1.4e-09	7_72939939_T_C	rs33951980
rs2066270	10	22147332	0	C	T	0.289074	0.997327	38.734	4.9e-10	0.00825596	0.00136445	36.6116	1.4e-09	10_22147332_C_T	rs7072776
rs10761739	10	65062008	0	G	C	0.58258	0.999599	37.9711	7.2e-10	0.007596	0.00125468	36.6525	1.4e-09	10_65062008_G_C	rs7924036
rs10761741	10	65066186	0	G	T	0.582536	0.999742	37.9483	7.3e-10	0.00759835	0.00125457	36.6819	1.4e-09	10_65066186_G_T	rs7924036
rs1823307	11	30859628	0	G	C	0.327425	0.992306	39.3159	3.6e-10	-0.00799595	0.00131924	36.736	1.4e-09	11_30859628_G_C	rs2761589
rs273614	11	30901982	0	A	G	0.328213	0.999467	39.0922	4e-10	-0.00796087	0.00131511	36.6437	1.4e-09	11_30901982_A_G	rs2761589
rs273613	11	30902893	0	T	C	0.328324	1	39.0111	4.2e-10	-0.00795974	0.00131468	36.6572	1.4e-09	11_30902893_T_C	rs2761589
rs273605	11	30965855	0	A	T	0.3289	0.989173	38.9675	4.3e-10	-0.00799948	0.0013202	36.7153	1.4e-09	11_30965855_A_T	rs2761589
rs10860384	12	78803607	0	A	G	0.557823	0.991194	40.1375	2.4e-10	0.00757177	0.00124997	36.6941	1.4e-09	12_78803607_A_G	rs12581220
rs7992046	13	56067721	0	T	C	0.278846	0.997147	36.5039	1.5e-09	-0.00834495	0.00137826	36.6594	1.4e-09	13_56067721_T_C	rs9537160
rs9537153	13	56099552	0	G	A	0.729016	0.997502	36.2223	1.8e-09	0.0084069	0.00138924	36.62	1.4e-09	13_56099552_G_A	rs9537160
rs11843496	13	56100372	0	G	A	0.730551	0.998474	36.4466	1.6e-09	0.00842367	0.00139134	36.6555	1.4e-09	13_56100372_G_A	rs9537160
rs9537154	13	56100889	0	C	A	0.730551	0.998474	36.4466	1.6e-09	0.00842367	0.00139134	36.6555	1.4e-09	13_56100889_C_A	rs9537160
rs9537155	13	56101010	0	T	C	0.730548	0.998454	36.4627	1.6e-09	0.0084256	0.00139135	36.6717	1.4e-09	13_56101010_T_C	rs9537160
rs7994260	13	56102005	0	G	A	0.730551	0.998474	36.4466	1.6e-09	0.00842367	0.00139134	36.6555	1.4e-09	13_56102005_G_A	rs9537160
rs9527409	13	56103060	0	T	C	0.730555	0.99847	36.4418	1.6e-09	0.00842283	0.00139134	36.6477	1.4e-09	13_56103060_T_C	rs9537160
rs9527410	13	56103140	0	G	T	0.730551	0.99848	36.4455	1.6e-09	0.00842348	0.00139133	36.6541	1.4e-09	13_56103140_G_T	rs9537160
rs9527411	13	56107809	0	G	A	0.730551	0.998488	36.418	1.6e-09	0.00841977	0.00139133	36.6217	1.4e-09	13_56107809_G_A	rs9537160
rs4130479	13	56108934	0	C	T	0.73063	0.998135	36.3653	1.6e-09	0.00842042	0.0013917	36.608	1.4e-09	13_56108934_C_T	rs9537160
rs9537161	13	56110132	0	C	T	0.730634	0.998296	36.4442	1.6e-09	0.00843097	0.00139162	36.704	1.4e-09	13_56110132_C_T	rs9537160
rs9597203	13	56111056	0	G	A	0.730626	0.99831	36.4915	1.5e-09	0.00843448	0.00139161	36.735	1.4e-09	13_56111056_G_A	rs9537160
rs9597204	13	56111207	0	C	A	0.730626	0.99831	36.4915	1.5e-09	0.00843447	0.00139161	36.7349	1.4e-09	13_56111207_C_A	rs9537160
rs9527412	13	56111656	0	T	C	0.730626	0.998311	36.49	1.5e-09	0.0084343	0.00139161	36.7336	1.4e-09	13_56111656_T_C	rs9537160
rs9537163	13	56115106	0	T	C	0.730625	0.998312	36.4862	1.5e-09	0.0084342	0.00139161	36.7329	1.4e-09	13_56115106_T_C	rs9537160
rs9537165	13	56115779	0	T	G	0.73063	0.998302	36.4931	1.5e-09	0.00843475	0.00139162	36.737	1.4e-09	13_56115779_T_G	rs9537160
rs9597205	13	56116025	0	C	G	0.73063	0.998302	36.4931	1.5e-09	0.00843475	0.00139162	36.737	1.4e-09	13_56116025_C_G	rs9537160
rs7993879	13	56116360	0	C	T	0.730551	0.998675	36.4997	1.5e-09	0.00843134	0.00139123	36.728	1.4e-09	13_56116360_C_T	rs9537160
rs9537167	13	56118476	0	A	G	0.730654	0.998252	36.475	1.5e-09	0.00842998	0.0013917	36.6915	1.4e-09	13_56118476_A_G	rs9537160
rs9537169	13	56119555	0	A	C	0.730558	0.998711	36.4462	1.6e-09	0.00842477	0.00139121	36.6715	1.4e-09	13_56119555_A_C	rs9537160
rs9537171	13	56119792	0	T	C	0.730633	0.998351	36.4465	1.6e-09	0.00842932	0.00139159	36.6911	1.4e-09	13_56119792_T_C	rs9537160
rs9537172	13	56119985	0	A	G	0.730628	0.998333	36.4735	1.5e-09	0.00843259	0.0013916	36.7194	1.4e-09	13_56119985_A_G	rs9537160
rs9537173	13	56120396	0	T	G	0.730632	0.998366	36.4522	1.6e-09	0.00843002	0.00139158	36.6978	1.4e-09	13_56120396_T_G	rs9537160
rs9537174	13	56123886	0	A	T	0.730559	0.99883	36.4747	1.5e-09	0.00842838	0.00139115	36.7061	1.4e-09	13_56123886_A_T	rs9537160
rs178184	14	26979193	0	T	G	0.248511	0.998195	34.3345	4.6e-09	-0.00865955	0.00142927	36.708	1.4e-09	14_26979193_T_G	rs7140993
rs178183	14	26979412	0	T	C	0.248511	0.998178	34.2864	4.8e-09	-0.00865404	0.00142928	36.6611	1.4e-09	14_26979412_T_C	rs7140993
rs1950418	14	27156182	0	C	A	0.253199	0.996981	29.4859	5.6e-08	-0.00862041	0.00142265	36.7161	1.4e-09	14_27156182_C_A	rs7140993
rs4886648	15	75308837	0	G	A	0.526107	0.998335	36.6744	1.4e-09	0.00750344	0.00123904	36.6732	1.4e-09	15_75308837_G_A	rs2472297
rs643428	1	54728858	0	C	T	0.393146	0.988699	34.5473	4.2e-09	0.00768192	0.00127171	36.489	1.5e-09	1_54728858_C_T	rs643428
rs9989775	2	61761774	0	A	G	0.398714	0.99888	38.4142	5.7e-10	-0.00762724	0.00126126	36.5701	1.5e-09	2_61761774_A_G	rs1562308
rs9381975	6	51366221	0	G	A	0.709514	0.997127	37.8295	7.7e-10	0.00823789	0.00136366	36.494	1.5e-09	6_51366221_G_A	rs2504671
rs35659126	7	72988069	0	C	T	0.804153	0.999943	34.0245	5.4e-09	0.00941456	0.00155681	36.5701	1.5e-09	7_72988069_C_T	rs33951980
rs10764313	10	21844605	0	T	A	0.71131	0.802537	34.4287	4.4e-09	-0.00923724	0.00152715	36.5866	1.5e-09	10_21844605_T_A	rs7072776
rs4748776	10	22277367	0	C	T	0.277547	0.994127	35.757	2.2e-09	0.0083607	0.00138398	36.4944	1.5e-09	10_22277367_C_T	rs7072776
rs10822159	10	65096250	0	C	T	0.582439	0.999926	37.7988	7.8e-10	0.00758228	0.00125441	36.5358	1.5e-09	10_65096250_C_T	rs7924036
rs273556	11	30866279	0	C	A	0.326594	0.993786	39.2624	3.7e-10	-0.00797834	0.00131961	36.5536	1.5e-09	11_30866279_C_A	rs2761589
rs273555	11	30866864	0	T	C	0.326587	0.99378	39.232	3.8e-10	-0.00797604	0.00131963	36.5319	1.5e-09	11_30866864_T_C	rs2761589
rs273553	11	30871743	0	T	C	0.327019	0.992551	39.1237	4e-10	-0.00797704	0.00131935	36.5565	1.5e-09	11_30871743_T_C	rs2761589
rs273589	11	30881109	0	A	G	0.328969	0.989797	39.037	4.2e-10	-0.0079807	0.00132014	36.5463	1.5e-09	11_30881109_A_G	rs2761589
rs9537137	13	56071468	0	G	A	0.278849	0.996476	36.4424	1.6e-09	-0.00833809	0.00137829	36.5975	1.5e-09	13_56071468_G_A	rs9537160
rs9537156	13	56106426	0	T	C	0.730556	0.998484	36.36	1.6e-09	0.00841534	0.00139133	36.5833	1.5e-09	13_56106426_T_C	rs9537160
rs9537157	13	56106453	0	G	A	0.730553	0.998462	36.3637	1.6e-09	0.00841574	0.00139134	36.5862	1.5e-09	13_56106453_G_A	rs9537160
rs9597201	13	56108225	0	G	A	0.730627	0.99808	36.3513	1.6e-09	0.00841837	0.00139171	36.5897	1.5e-09	13_56108225_G_A	rs9537160
rs4130480	13	56108958	0	C	A	0.730635	0.998121	36.3601	1.6e-09	0.00841956	0.00139172	36.5997	1.5e-09	13_56108958_C_A	rs9537160
rs7327718	13	56113620	0	G	C	0.730166	0.997177	36.3612	1.6e-09	0.00841713	0.00139167	36.5809	1.5e-09	13_56113620_G_C	rs9537160
rs631140	13	56135112	0	A	G	0.270084	1	36.3356	1.7e-09	-0.00839822	0.00139014	36.4971	1.5e-09	13_56135112_A_G	rs9537160
rs1245214	14	26935221	0	G	A	0.248017	0.992584	34.146	5.1e-09	-0.00867048	0.00143395	36.5612	1.5e-09	14_26935221_G_A	rs7140993
rs2103836	14	27156285	0	C	T	0.252274	0.994748	29.4896	5.6e-08	-0.00862638	0.00142608	36.5907	1.5e-09	14_27156285_C_T	rs7140993
rs2103835	14	27156299	0	G	A	0.252274	0.994746	29.4873	5.6e-08	-0.00862611	0.00142608	36.5883	1.5e-09	14_27156299_G_A	rs7140993
rs12898551	15	75297907	0	C	G	0.526138	0.998903	36.5984	1.5e-09	0.00748976	0.00123858	36.5669	1.5e-09	15_75297907_C_G	rs2472297
rs630602	1	54728864	0	G	C	0.393301	0.988556	34.3553	4.6e-09	0.00767738	0.00127203	36.4274	1.6e-09	1_54728864_G_C	rs643428
rs2422137	1	72619961	0	C	A	0.545986	0.990815	33.6904	6.5e-09	0.00750123	0.00124279	36.4306	1.6e-09	1_72619961_C_A	rs2422137
rs1992765	2	61751333	0	A	G	0.398277	0.998285	38.4631	5.6e-10	-0.00760749	0.0012618	36.3501	1.6e-09	2_61751333_A_G	rs1562308
rs2431108	5	103947968	0	T	C	0.671264	0.996551	31.4563	2e-08	-0.00793041	0.00131522	36.3578	1.6e-09	5_103947968_T_C	rs40465
rs35131689	5	148108146	0	T	C	0.741868	0.99523	37.1286	1.1e-09	0.00854549	0.00141531	36.456	1.6e-09	5_148108146_T_C	rs13163314
rs7766486	6	98528141	0	T	C	0.607449	0.996849	38.5408	5.4e-10	0.00765091	0.00126826	36.3922	1.6e-09	6_98528141_T_C	rs9387963
rs7742854	6	98528143	0	C	T	0.606969	0.995916	38.6778	5e-10	0.00766108	0.00126863	36.468	1.6e-09	6_98528143_C_T	rs9387963
rs2666779	10	22147799	0	C	T	0.289134	0.99726	38.5606	5.3e-10	0.0082387	0.00136437	36.4629	1.6e-09	10_22147799_C_T	rs7072776
rs10761737	10	65052205	0	T	C	0.583524	0.997978	37.8974	7.5e-10	0.00758211	0.0012558	36.4533	1.6e-09	10_65052205_T_C	rs7924036
rs273551	11	30872579	0	C	A	0.327057	0.992821	38.9753	4.3e-10	-0.00795735	0.00131913	36.3885	1.6e-09	11_30872579_C_A	rs2761589
rs273550	11	30873650	0	C	T	0.327068	0.992908	38.9901	4.3e-10	-0.0079591	0.00131905	36.4087	1.6e-09	11_30873650_C_T	rs2761589
rs273593	11	30878012	0	T	C	0.328604	0.995488	38.8212	4.6e-10	-0.00794816	0.00131707	36.4178	1.6e-09	11_30878012_T_C	rs2761589
rs273592	11	30878849	0	C	T	0.328609	0.995424	38.8329	4.6e-10	-0.00794812	0.00131711	36.4153	1.6e-09	11_30878849_C_T	rs2761589
rs273618	11	30894383	0	A	G	0.328793	0.998263	38.6352	5.1e-10	-0.00793528	0.00131532	36.3967	1.6e-09	11_30894383_A_G	rs2761589
rs178193	14	26972984	0	T	C	0.248131	0.997224	34.1436	5.1e-09	-0.00863588	0.00143077	36.4313	1.6e-09	14_26972984_T_C	rs7140993
rs61986523	14	27010629	0	C	A	0.752626	0.99388	33.5704	6.9e-09	0.00864967	0.00143465	36.3501	1.6e-09	14_27010629_C_A	rs7140993
rs62132801	19	49267882	0	A	T	0.904489	0.950162	30.8681	2.8e-08	-0.0129817	0.00214981	36.464	1.6e-09	19_49267882_A_T	rs838133
rs74928908	2	27744089	0	A	G	0.840016	0.998427	33.2414	8.1e-09	0.0101417	0.00168362	36.285	1.7e-09	2_27744089_A_G	rs1260326
rs1516179	2	51931964	0	A	C	0.134252	0.988723	44.1613	3e-11	-0.0109694	0.00182075	36.2966	1.7e-09	2_51931964_A_C	rs1516187
rs12612677	2	61729695	0	A	C	0.40011	0.996351	38.0415	6.9e-10	-0.00759867	0.00126206	36.2508	1.7e-09	2_61729695_A_C	rs1562308
rs7563678	2	61741811	0	T	C	0.389753	0.998284	36.8309	1.3e-09	-0.00762626	0.00126667	36.249	1.7e-09	2_61741811_T_C	rs1562308
rs11678419	2	61743377	0	C	T	0.389457	0.998069	36.8946	1.2e-09	-0.00763083	0.00126693	36.2775	1.7e-09	2_61743377_C_T	rs1562308
rs2518937	2	61791954	0	C	T	0.413561	0.996842	39.0458	4.1e-10	-0.0075641	0.00125557	36.294	1.7e-09	2_61791954_C_T	rs1562308
rs2921718	2	61795267	0	C	A	0.413056	0.996691	38.8128	4.7e-10	-0.00756589	0.00125596	36.2882	1.7e-09	2_61795267_C_A	rs1562308
rs4667483	2	166197777	0	G	A	0.755317	0.997799	39.679	3e-10	0.00866439	0.00143749	36.3302	1.7e-09	2_166197777_G_A	rs16850592
rs62174667	2	166198526	0	A	G	0.754769	0.999945	39.7488	2.9e-10	0.00864152	0.00143492	36.2681	1.7e-09	2_166198526_A_G	rs16850592
rs16850433	2	166199387	0	T	C	0.754768	0.999963	39.7404	2.9e-10	0.00864038	0.00143491	36.2592	1.7e-09	2_166199387_T_C	rs16850592
rs3943809	2	166200881	0	A	G	0.754763	0.999963	39.8256	2.8e-10	0.00865036	0.0014349	36.3434	1.7e-09	2_166200881_A_G	rs16850592
rs72623151	2	166207275	0	G	A	0.754747	0.999848	39.757	2.9e-10	0.00864213	0.00143495	36.2718	1.7e-09	2_166207275_G_A	rs16850592
rs16850454	2	166207342	0	C	T	0.75477	0.999972	39.7392	2.9e-10	0.00863984	0.0014349	36.2549	1.7e-09	2_166207342_C_T	rs16850592
rs16850467	2	166207877	0	G	C	0.754778	0.999949	39.7583	2.9e-10	0.00864481	0.00143493	36.2952	1.7e-09	2_166207877_G_C	rs16850592
rs4858144	3	25188640	0	G	A	0.357629	0.98535	35.4808	2.6e-09	-0.0078223	0.0012981	36.3123	1.7e-09	3_25188640_G_A	rs7619139
rs11974409	7	72989390	0	A	G	0.804057	0.999708	33.8474	6e-09	0.00937935	0.0015566	36.3073	1.7e-09	7_72989390_A_G	rs33951980
rs9638180	7	72998952	0	A	G	0.804118	0.999717	33.7707	6.2e-09	0.00937873	0.00155683	36.2917	1.7e-09	7_72998952_A_G	rs33951980
rs10822155	10	65071215	0	C	A	0.583527	0.998923	37.8959	7.5e-10	0.00756314	0.00125522	36.3048	1.7e-09	10_65071215_C_A	rs7924036
rs10740118	10	65101207	0	G	C	0.582231	1	37.7241	8.1e-10	0.00756111	0.00125426	36.3408	1.7e-09	10_65101207_G_C	rs7924036
rs273594	11	30876113	0	G	C	0.328547	0.995699	38.8648	4.5e-10	-0.00794015	0.00131706	36.3454	1.7e-09	11_30876113_G_C	rs2761589
rs163854	11	30964632	0	G	T	0.32736	0.989874	38.6621	5e-10	-0.00795927	0.00132152	36.2742	1.7e-09	11_30964632_G_T	rs2761589
[truncated: 827 more rows]
