# Supplementary material for: GWAS for urinary sodium and potassium excretion highlights pathways shared with cardiovascular traits
Source: Nat Commun. 2019 Aug 13;10:3653. doi: 10.1038/s41467-019-11451-y (PMC6692500; doi:10.1038/s41467-019-11451-y)
Supplement: Supplementary file 2 — Supplementary Dataset 2 [file 41467_2019_11451_MOESM2_ESM.xlsx]

## Sheet: Supplementary Data 2
Supplementary Data 2:Genome-wide association results for urinary potassium exression at P<1*10-8.
SNP	CHR	BP	GENPOS	ALLELE1	ALLELE0	A1FREQ	INFO	CHISQ_LINREG	P_LINREG	BETA	SE	CHISQ_BOLT_LMM_INF	P_BOLT_LMM_INF	Chr_Pos_A1_A2	LeadSNP
rs13143189	4	3757380	0	G	A	0.563914	0.983018	78.4239	8.3e-19	0.0109685	0.00121798	81.0985	2.1e-19	4_3757380_G_A	rs13143189
rs13131264	4	3757751	0	T	C	0.345655	0.982725	70.7843	4e-17	0.0105411	0.00126697	69.2214	8.8e-17	4_3757751_T_C	rs13143189
rs4916601	4	3756297	0	G	T	0.349668	0.981749	70.478	4.7e-17	0.0105083	0.00126425	69.0874	9.4e-17	4_3756297_G_T	rs13143189
rs12645890	4	3754427	0	T	G	0.654853	0.977911	69.6265	7.2e-17	-0.0104816	0.00127031	68.0821	1.6e-16	4_3754427_T_G	rs13143189
rs4498196	4	3747842	0	A	C	0.594252	0.961296	65.9471	4.6e-16	-0.010045	0.00124307	65.2992	6.4e-16	4_3747842_A_C	rs13143189
rs10005414	4	3755589	0	C	T	0.662415	0.978455	65.7422	5.1e-16	-0.0102398	0.0012768	64.3176	1.1e-15	4_3755589_C_T	rs13143189
rs9291156	4	3754818	0	A	G	0.544253	0.979914	61.4409	4.6e-15	-0.00962363	0.00121346	62.8967	2.2e-15	4_3754818_A_G	rs13143189
rs17813250	4	3754715	0	C	G	0.544164	0.979712	61.1528	5.3e-15	-0.00960164	0.00121356	62.5994	2.5e-15	4_3754715_C_G	rs13143189
rs2472297	15	75027880	0	C	T	0.737346	1	61.0219	5.6e-15	0.0106514	0.00135803	61.5161	4.4e-15	15_75027880_C_T	rs2472297
rs12641452	4	3748134	0	C	A	0.641608	0.976732	60.8201	6.3e-15	-0.0097457	0.0012622	59.6167	1.2e-14	4_3748134_C_A	rs13143189
rs440318	4	3744294	0	G	A	0.461657	0.996405	60.8437	6.2e-15	-0.00925683	0.00120477	59.0356	1.5e-14	4_3744294_G_A	rs13143189
rs11943482	4	3752797	0	A	G	0.60644	0.971011	58.9576	1.6e-14	-0.0095299	0.00123967	59.0967	1.5e-14	4_3752797_A_G	rs13143189
rs10013535	4	3753417	0	C	T	0.421492	0.955997	56.764	4.9e-14	-0.0095364	0.00123982	59.163	1.5e-14	4_3753417_C_T	rs13143189
rs419315	4	3744011	0	C	T	0.461997	1	59.9127	9.9e-15	-0.00916798	0.00120291	58.0872	2.5e-14	4_3744011_C_T	rs13143189
rs2857955	4	3741660	0	T	C	0.535972	0.985782	59.7297	1.1e-14	0.00921155	0.00121067	57.8911	2.8e-14	4_3741660_T_C	rs13143189
rs13127170	4	3758382	0	A	G	0.448411	0.981744	56.5542	5.5e-14	0.00922333	0.00121367	57.7526	3e-14	4_3758382_A_G	rs13143189
rs441105	4	3743820	0	G	A	0.460965	0.997042	59.4526	1.3e-14	-0.00914856	0.00120471	57.6688	3.1e-14	4_3743820_G_A	rs13143189
rs374727	4	3743792	0	A	G	0.461026	0.996554	59.1524	1.5e-14	-0.0091285	0.00120485	57.4028	3.6e-14	4_3743792_A_G	rs13143189
rs430608	4	3744069	0	T	G	0.460877	0.998029	59.1995	1.4e-14	-0.00911747	0.00120376	57.3678	3.6e-14	4_3744069_T_G	rs13143189
rs447354	4	3743797	0	T	C	0.461057	0.99685	58.9551	1.6e-14	-0.00911415	0.00120482	57.2254	3.9e-14	4_3743797_T_C	rs13143189
rs369200	4	3743004	0	T	C	0.460665	0.990959	58.6287	1.9e-14	-0.00910438	0.00120787	56.8142	4.8e-14	4_3743004_T_C	rs13143189
rs445275	4	3742998	0	G	T	0.461523	0.990942	57.0948	4.2e-14	-0.00898583	0.00120767	55.3629	1e-13	4_3742998_G_T	rs13143189
rs2857958	4	3741038	0	T	G	0.435992	0.970833	57.4915	3.4e-14	0.00910305	0.00122584	55.1453	1.1e-13	4_3741038_T_G	rs13143189
rs2748751	4	3742818	0	G	T	0.543959	0.985584	53.762	2.3e-13	0.00879232	0.00121165	52.657	4e-13	4_3742818_G_T	rs13143189
rs428771	4	3746133	0	G	C	0.43409	0.970644	51.6946	6.5e-13	-0.00885507	0.00122683	52.0973	5.3e-13	4_3746133_G_C	rs13143189
rs423287	4	3745351	0	T	G	0.449658	0.986684	51.3478	7.7e-13	-0.00862981	0.00121262	50.6468	1.1e-12	4_3745351_T_G	rs13143189
rs9790534	4	3756512	0	C	T	0.683703	1	47.0745	6.8e-12	0.00915137	0.00128864	50.4326	1.2e-12	4_3756512_C_T	rs13143189
rs2857959	4	3740717	0	A	G	0.47541	0.978125	52.2565	4.9e-13	0.00854548	0.00121336	49.6009	1.9e-12	4_3740717_A_G	rs13143189
rs4410790	7	17284577	0	T	C	0.368691	1	53.9329	2.1e-13	0.00874545	0.00124235	49.5534	1.9e-12	7_17284577_T_C	rs4410790
rs6968865	7	17287269	0	A	T	0.372091	1	52.9353	3.4e-13	0.00859737	0.0012272	49.0799	2.5e-12	7_17287269_A_T	rs4410790
rs72704791	5	547896	0	A	G	0.808299	0.99884	47.7108	4.9e-12	0.0106017	0.00152158	48.547	3.2e-12	5_547896_A_G	rs72704791
rs6968554	7	17287106	0	A	G	0.366438	0.998076	52.3457	4.7e-13	0.00866737	0.00124405	48.5396	3.2e-12	7_17287106_A_G	rs4410790
rs72704799	5	551457	0	C	G	0.808717	0.997885	47.7332	4.9e-12	0.0106129	0.00152375	48.5109	3.3e-12	5_551457_C_G	rs72704791
rs4973766	3	27413566	0	C	T	0.542639	0.997149	43.2701	4.8e-11	0.00836621	0.0012037	48.308	3.6e-12	3_27413566_C_T	rs4973766
rs10281571	7	17285867	0	C	G	0.861533	0.9788	47.9254	4.4e-12	-0.0121641	0.00175356	48.119	4e-12	7_17285867_C_G	rs4410790
rs17563576	5	560476	0	A	G	0.805757	0.997938	47.4541	5.6e-12	0.0104956	0.00151472	48.0122	4.2e-12	5_560476_A_G	rs72704791
rs12521988	5	556421	0	C	T	0.805746	0.999068	47.1231	6.7e-12	0.0104572	0.00151386	47.7153	4.9e-12	5_556421_C_T	rs72704791
rs2470893	15	75019449	0	C	T	0.670133	1	46.5031	9.1e-12	0.00877607	0.00127217	47.5897	5.3e-12	15_75019449_C_T	rs2472297
rs72706608	5	559203	0	C	T	0.806026	0.99912	46.8847	7.5e-12	0.0104416	0.00151465	47.5237	5.4e-12	5_559203_C_T	rs72704791
rs12521051	5	560440	0	C	T	0.805577	0.998211	47.0373	7e-12	0.010437	0.00151393	47.5271	5.4e-12	5_560440_C_T	rs72704791
rs12519763	5	559145	0	C	T	0.806027	0.999163	46.8761	7.6e-12	0.0104405	0.00151462	47.5148	5.5e-12	5_559145_C_T	rs72704791
rs2106727	7	17287998	0	A	G	0.365988	0.997848	51.1387	8.6e-13	0.00856066	0.00124446	47.321	6e-12	7_17287998_A_G	rs4410790
rs17497684	5	558307	0	T	C	0.805729	1	46.6197	8.6e-12	0.0103916	0.00151329	47.1544	6.6e-12	5_558307_T_C	rs72704791
rs12522303	5	555564	0	A	C	0.805772	0.998863	46.4507	9.4e-12	0.0103861	0.00151412	47.0529	6.9e-12	5_555564_A_C	rs72704791
rs72706611	5	561146	0	C	A	0.805797	0.998026	46.45	9.4e-12	0.0103804	0.00151485	46.9556	7.3e-12	5_561146_C_A	rs72704791
rs72706612	5	561198	0	C	T	0.805768	0.998156	46.4091	9.6e-12	0.0103749	0.00151466	46.9176	7.4e-12	5_561198_C_T	rs72704791
rs72706610	5	561111	0	G	A	0.80575	0.998147	46.3609	9.8e-12	0.0103726	0.00151463	46.8993	7.5e-12	5_561111_G_A	rs72704791
rs72706606	5	558609	0	T	C	0.805932	0.999395	46.2211	1.1e-11	0.0103595	0.00151416	46.8093	7.8e-12	5_558609_T_C	rs72704791
rs72704802	5	554211	0	C	T	0.806079	0.998109	46.2314	1.1e-11	0.0103574	0.00151537	46.7155	8.2e-12	5_554211_C_T	rs72704791
rs11740553	5	672593	0	C	T	0.807486	0.992456	46.2649	1e-11	0.0104051	0.00152328	46.6587	8.4e-12	5_672593_C_T	rs72704791
rs4957056	5	570105	0	T	C	0.805526	0.995616	46.156	1.1e-11	0.0103429	0.00151566	46.5673	8.9e-12	5_570105_T_C	rs72704791
rs61384641	5	548230	0	G	A	0.766819	0.996243	45.9843	1.2e-11	0.00963088	0.00141716	46.184	1.1e-11	5_548230_G_A	rs72704791
rs4527146	5	555236	0	A	G	0.80494	0.99736	45.2229	1.8e-11	0.0102541	0.00151174	46.0084	1.2e-11	5_555236_A_G	rs72704791
rs72703026	5	572383	0	G	A	0.804465	0.995728	45.385	1.6e-11	0.0102208	0.00151244	45.6679	1.4e-11	5_572383_G_A	rs72704791
rs4081846	5	574019	0	G	A	0.804412	0.995718	45.3165	1.7e-11	0.0102139	0.00151237	45.6109	1.4e-11	5_574019_G_A	rs72704791
rs4081847	5	574072	0	G	A	0.804411	0.995716	45.3156	1.7e-11	0.0102139	0.00151237	45.6104	1.4e-11	5_574072_G_A	rs72704791
rs4957053	5	575927	0	T	C	0.804424	0.995663	45.2044	1.8e-11	0.010203	0.00151248	45.507	1.5e-11	5_575927_T_C	rs72704791
rs111352378	5	577079	0	G	A	0.804448	0.995413	45.1717	1.8e-11	0.0102007	0.00151274	45.4712	1.5e-11	5_577079_G_A	rs72704791
rs72703034	5	577101	0	C	T	0.804459	0.995489	45.1704	1.8e-11	0.0102006	0.00151272	45.4713	1.5e-11	5_577101_C_T	rs72704791
rs72703051	5	582997	0	G	A	0.819419	0.991433	44.524	2.5e-11	0.0105459	0.00156347	45.4974	1.5e-11	5_582997_G_A	rs72704791
rs72707023	5	667620	0	G	A	0.809097	0.988913	45.7776	1.3e-11	0.0103393	0.00153172	45.5643	1.5e-11	5_667620_G_A	rs72704791
rs28563961	5	554498	0	C	G	0.813468	0.971993	44.3591	2.7e-11	0.0104997	0.00155911	45.3523	1.6e-11	5_554498_C_G	rs72704791
rs7443550	5	578404	0	G	T	0.804401	0.996168	45.1094	1.9e-11	0.0101896	0.00151208	45.4116	1.6e-11	5_578404_G_T	rs72704791
rs72703042	5	579269	0	C	T	0.8044	0.996422	45.0452	1.9e-11	0.0101813	0.0015119	45.348	1.6e-11	5_579269_C_T	rs72704791
rs58015612	5	580665	0	A	T	0.804404	0.996979	44.9778	2e-11	0.0101711	0.00151153	45.2799	1.7e-11	5_580665_A_T	rs72704791
rs56216231	5	581193	0	G	A	0.80438	0.997135	45.052	1.9e-11	0.0101764	0.00151135	45.3374	1.7e-11	5_581193_G_A	rs72704791
rs4245972	5	578572	0	A	G	0.80447	0.996066	44.8557	2.1e-11	0.0101601	0.00151233	45.1343	1.8e-11	5_578572_A_G	rs72704791
rs12515813	5	671826	0	A	T	0.807294	0.992343	44.7677	2.2e-11	0.0102332	0.00152291	45.1516	1.8e-11	5_671826_A_T	rs72704791
rs11742854	5	674141	0	A	G	0.80665	0.990721	44.6778	2.3e-11	0.0102333	0.00152203	45.2047	1.8e-11	5_674141_A_G	rs72704791
rs77015126	5	670909	0	G	A	0.807046	0.992193	44.624	2.4e-11	0.0102143	0.00152218	45.0278	1.9e-11	5_670909_G_A	rs72704791
rs72707027	5	671294	0	C	G	0.807022	0.992665	44.606	2.4e-11	0.0102151	0.00152177	45.0601	1.9e-11	5_671294_C_G	rs72704791
rs56350081	5	583198	0	G	A	0.805087	0.995478	44.3338	2.8e-11	0.010115	0.00151487	44.5837	2.4e-11	5_583198_G_A	rs72704791
rs12522140	5	587261	0	C	A	0.804635	0.997473	44.0866	3.1e-11	0.0100818	0.00151188	44.4671	2.6e-11	5_587261_C_A	rs72704791
rs56278696	5	582669	0	A	G	0.804351	0.998448	44.1012	3.1e-11	0.0100577	0.00151022	44.3527	2.7e-11	5_582669_A_G	rs72704791
rs72703065	5	588123	0	C	A	0.804936	0.997208	43.9504	3.4e-11	0.0100786	0.00151289	44.3801	2.7e-11	5_588123_C_A	rs72704791
rs56328416	5	591138	0	G	A	0.804135	0.99592	44.0177	3.3e-11	0.0100652	0.00151099	44.3737	2.7e-11	5_591138_G_A	rs72704791
rs12518859	5	587432	0	C	T	0.804932	0.997421	43.9157	3.4e-11	0.0100722	0.00151272	44.333	2.8e-11	5_587432_C_T	rs72704791
rs72703064	5	587825	0	T	C	0.804969	0.99708	43.8853	3.5e-11	0.01007	0.00151305	44.2948	2.8e-11	5_587825_T_C	rs72704791
rs1399381	5	589853	0	G	T	0.804181	0.996758	43.8558	3.5e-11	0.0100482	0.00151086	44.2313	2.9e-11	5_589853_G_T	rs72704791
rs56108664	5	537890	0	C	T	0.802293	0.992708	42.5795	6.8e-11	0.0100236	0.00150762	44.2044	3e-11	5_537890_C_T	rs72704791
rs72703072	5	590626	0	A	G	0.804102	0.996049	43.8111	3.6e-11	0.0100412	0.00151083	44.1719	3e-11	5_590626_A_G	rs72704791
rs12521091	5	590710	0	C	A	0.804103	0.996027	43.8315	3.6e-11	0.0100438	0.00151084	44.1931	3e-11	5_590710_C_A	rs72704791
rs12522724	5	590742	0	T	C	0.804092	0.995968	43.812	3.6e-11	0.0100422	0.00151085	44.1796	3e-11	5_590742_T_C	rs72704791
rs11749927	5	668842	0	C	T	0.805152	0.987689	44.002	3.3e-11	0.0100937	0.00152037	44.0764	3.2e-11	5_668842_C_T	rs72704791
rs72703070	5	590458	0	T	C	0.804068	0.995998	43.6282	4e-11	0.0100218	0.00151075	44.0051	3.3e-11	5_590458_T_C	rs72704791
rs56294732	5	568144	0	T	C	0.778448	0.995934	42.8092	6e-11	0.00956702	0.00144337	43.934	3.4e-11	5_568144_T_C	rs72704791
rs11948381	5	568413	0	A	T	0.778526	0.996186	42.6831	6.4e-11	0.00955484	0.00144344	43.8178	3.6e-11	5_568413_A_T	rs72704791
rs56368535	5	582362	0	G	A	0.804396	0.99829	43.5689	4.1e-11	0.00999738	0.00151063	43.7982	3.6e-11	5_582362_G_A	rs72704791
rs6774748	3	27405705	0	A	G	0.525877	0.995403	38.8628	4.5e-10	0.0079543	0.00120225	43.7741	3.7e-11	3_27405705_A_G	rs4973766
rs11960158	5	568665	0	C	T	0.778482	0.995963	42.6669	6.5e-11	0.00954979	0.00144342	43.7724	3.7e-11	5_568665_C_T	rs72704791
rs11960196	5	568857	0	C	A	0.778492	0.995928	42.6146	6.7e-11	0.00954484	0.00144348	43.7233	3.8e-11	5_568857_C_A	rs72704791
rs11960159	5	568685	0	C	T	0.778512	0.996066	42.5592	6.9e-11	0.00953855	0.00144342	43.6698	3.9e-11	5_568685_C_T	rs72704791
rs4957057	5	569230	0	C	G	0.778501	0.996137	42.5446	6.9e-11	0.00953901	0.00144348	43.6701	3.9e-11	5_569230_C_G	rs72704791
rs7723049	5	524772	0	A	G	0.801013	0.985876	41.7795	1e-10	0.00995362	0.00150705	43.6222	4e-11	5_524772_A_G	rs72704791
rs12519469	5	581772	0	A	G	0.803561	0.992167	43.1513	5.1e-11	0.00997344	0.00151203	43.5079	4.2e-11	5_581772_A_G	rs72704791
rs6555357	5	560923	0	A	G	0.777521	0.996322	42.0578	8.9e-11	0.00949633	0.00144036	43.468	4.3e-11	5_560923_A_G	rs72704791
rs56230617	5	535662	0	G	A	0.80264	0.99135	41.725	1.1e-10	0.00994733	0.0015095	43.4256	4.4e-11	5_535662_G_A	rs72704791
rs1051545	3	27416999	0	T	C	0.524097	0.997745	38.3783	5.8e-10	0.00790741	0.00120087	43.3587	4.6e-11	3_27416999_T_C	rs4973766
rs55647623	5	567747	0	T	C	0.778283	0.996137	42.2305	8.1e-11	0.00949257	0.00144275	43.2897	4.7e-11	5_567747_T_C	rs72704791
rs12516318	5	676423	0	G	A	0.811264	0.996831	42.9713	5.6e-11	0.0100784	0.00153154	43.3036	4.7e-11	5_676423_G_A	rs72704791
rs35107470	15	74817689	0	A	G	0.677433	0.942692	41.9473	9.4e-11	0.00866536	0.00131791	43.2318	4.9e-11	15_74817689_A_G	rs2472297
rs72707041	5	677152	0	G	A	0.811315	0.997584	42.7989	6.1e-11	0.0100566	0.00153114	43.1397	5.1e-11	5_677152_G_A	rs72704791
rs72707044	5	677239	0	T	C	0.811314	0.997603	42.7856	6.1e-11	0.0100549	0.00153112	43.1256	5.1e-11	5_677239_T_C	rs72704791
rs72707043	5	677200	0	C	T	0.811309	0.997526	42.7477	6.2e-11	0.01005	0.00153113	43.0836	5.2e-11	5_677200_C_T	rs72704791
rs12519390	5	676546	0	A	G	0.811278	0.997095	42.6991	6.4e-11	0.0100449	0.00153139	43.0248	5.4e-11	5_676546_A_G	rs72704791
rs10049490	3	27241776	0	G	T	0.4432	0.996254	37.5357	9e-10	0.00790054	0.00120598	42.9173	5.7e-11	3_27241776_G_T	rs4973766
rs55782834	3	27372628	0	C	T	0.524835	0.997619	38.373	5.8e-10	-0.00785522	0.00119963	42.8771	5.8e-11	3_27372628_C_T	rs4973766
rs491976	3	27367221	0	T	C	0.471808	0.99911	38.2598	6.2e-10	0.00785125	0.00119913	42.8695	5.9e-11	3_27367221_T_C	rs4973766
rs4973768	3	27416013	0	C	T	0.525963	1	37.8573	7.6e-10	0.00787884	0.00120346	42.8607	5.9e-11	3_27416013_C_T	rs4973766
rs1352944	3	27374101	0	C	A	0.524798	0.997378	38.2215	6.3e-10	-0.00784094	0.00119976	42.712	6.3e-11	3_27374101_C_A	rs4973766
rs35696919	5	686244	0	C	A	0.811418	0.992035	42.2567	8e-11	0.0100361	0.00153565	42.7114	6.3e-11	5_686244_C_A	rs72704791
rs1352943	3	27368875	0	C	G	0.528834	0.999813	38.1416	6.6e-10	-0.00783185	0.00119873	42.6857	6.4e-11	3_27368875_C_G	rs4973766
rs254023	5	103955361	0	T	C	0.560891	0.999278	39.897	2.7e-10	-0.007873	0.00120633	42.594	6.7e-11	5_103955361_T_C	rs254023
rs3920005	3	27368884	0	T	C	0.528491	1	37.8469	7.7e-10	-0.00780943	0.00119866	42.4472	7.3e-11	3_27368884_T_C	rs4973766
rs254020	5	103950251	0	C	T	0.561095	0.999323	39.7165	2.9e-10	-0.00785498	0.00120642	42.3931	7.5e-11	5_103950251_C_T	rs254023
rs9820391	3	27238725	0	G	A	0.443132	0.996283	37.0372	1.2e-09	0.00784889	0.001206	42.3566	7.6e-11	3_27238725_G_A	rs4973766
rs3915384	5	573395	0	C	A	0.777427	0.995782	41.6115	1.1e-10	0.00937761	0.00144116	42.341	7.7e-11	5_573395_C_A	rs72704791
rs254035	5	103936343	0	T	A	0.560934	0.996871	39.0676	4.1e-10	-0.00785618	0.00120764	42.3206	7.7e-11	5_103936343_T_A	rs254023
rs10275488	7	17303778	0	C	T	0.879944	0.994726	43.1347	5.1e-11	-0.0120213	0.001849	42.2695	8e-11	7_17303778_C_T	rs4410790
rs185260	5	103965223	0	A	C	0.56177	0.995299	39.4377	3.4e-10	-0.00783952	0.00120846	42.0839	8.7e-11	5_103965223_A_C	rs254023
rs33817	5	103978326	0	G	A	0.562903	0.994964	38.9504	4.3e-10	-0.00784145	0.00120895	42.0704	8.8e-11	5_103978326_G_A	rs254023
rs56060145	5	681279	0	G	C	0.811284	0.997427	41.646	1.1e-10	0.00992316	0.00153108	42.0052	9.1e-11	5_681279_G_C	rs72704791
rs1363100	5	103946206	0	A	T	0.561301	0.999107	39.1582	3.9e-10	-0.00782	0.00120654	42.008	9.1e-11	5_103946206_A_T	rs254023
rs3213930	3	27297816	0	G	C	0.471955	0.998171	37.0908	1.1e-09	0.00776455	0.00119962	41.8933	9.6e-11	3_27297816_G_C	rs4973766
rs113948530	5	681976	0	G	A	0.811272	0.997625	41.5457	1.2e-10	0.0099106	0.00153088	41.9097	9.6e-11	5_681976_G_A	rs72704791
rs11129270	3	27257943	0	A	G	0.453901	0.998336	36.3638	1.6e-09	0.00778072	0.00120258	41.861	9.8e-11	3_27257943_A_G	rs4973766
rs9848482	3	27224050	0	G	A	0.437962	0.993983	36.775	1.3e-09	0.00781847	0.00120878	41.8358	9.9e-11	3_27224050_G_A	rs4973766
rs13085724	3	27258758	0	C	T	0.453943	0.998365	36.3353	1.7e-09	0.00777729	0.00120255	41.8266	1e-10	3_27258758_C_T	rs4973766
rs72703046	5	580129	0	T	C	0.777781	0.99559	41.0441	1.5e-10	0.00931751	0.00144222	41.7388	1e-10	5_580129_T_C	rs72704791
rs254045	5	103959345	0	A	G	0.561681	0.999172	39.1608	3.9e-10	-0.00779448	0.00120657	41.7318	1e-10	5_103959345_A_G	rs254023
rs9842044	3	27263248	0	G	C	0.453969	0.9984	36.1482	1.8e-09	0.00775691	0.00120255	41.6074	1.1e-10	3_27263248_G_C	rs4973766
rs2034190	3	27292557	0	T	C	0.47209	0.998119	36.8733	1.3e-09	0.00774199	0.0011996	41.6517	1.1e-10	3_27292557_T_C	rs4973766
rs4957049	5	579080	0	C	A	0.777462	0.996443	40.9263	1.6e-10	0.00929262	0.00144079	41.5985	1.1e-10	5_579080_C_A	rs72704791
rs7634574	3	27223319	0	C	A	0.462031	0.995763	36.7776	1.3e-09	0.00773624	0.00120239	41.397	1.2e-10	3_27223319_C_A	rs4973766
rs7615829	3	27252196	0	C	G	0.454075	0.998419	36.0926	1.9e-09	0.00774612	0.00120254	41.4926	1.2e-10	3_27252196_C_G	rs4973766
rs6551182	3	27252491	0	T	A	0.454033	0.998429	36.1087	1.9e-09	0.00774724	0.00120255	41.5037	1.2e-10	3_27252491_T_A	rs4973766
rs2370946	3	27260283	0	G	A	0.453902	0.998274	36.0451	1.9e-09	0.00774907	0.0012026	41.5196	1.2e-10	3_27260283_G_A	rs4973766
rs72703044	5	579737	0	G	A	0.777453	0.996729	40.8221	1.7e-10	0.00928053	0.0014406	41.5013	1.2e-10	5_579737_G_A	rs72704791
rs72707016	5	665148	0	A	G	0.800236	1	41.0922	1.5e-10	0.009644	0.0014983	41.43	1.2e-10	5_665148_A_G	rs72704791
rs11745112	5	685849	0	G	A	0.81109	0.997182	41.2156	1.4e-10	0.00985925	0.00153053	41.4955	1.2e-10	5_685849_G_A	rs72704791
rs2447832	5	103933473	0	C	T	0.560417	0.997119	38.1213	6.6e-10	-0.007771	0.00120716	41.4404	1.2e-10	5_103933473_C_T	rs254023
rs2431109	5	103945126	0	A	G	0.561364	0.998947	38.5522	5.3e-10	-0.00776815	0.00120652	41.4543	1.2e-10	5_103945126_A_G	rs254023
rs2447828	5	103947205	0	C	T	0.561148	1	38.6485	5.1e-10	-0.00776722	0.00120598	41.4812	1.2e-10	5_103947205_C_T	rs254023
rs10277582	7	17284989	0	C	T	0.881565	0.993984	42.447	7.3e-11	-0.0119811	0.00185992	41.4956	1.2e-10	7_17284989_C_T	rs4410790
rs12715119	3	27221769	0	T	C	0.456698	0.99453	36.4002	1.6e-09	0.00774265	0.00120425	41.3375	1.3e-10	3_27221769_T_C	rs4973766
rs2370941	3	27292683	0	C	A	0.472299	0.997908	36.4697	1.6e-09	0.00770761	0.00119965	41.2794	1.3e-10	3_27292683_C_A	rs4973766
rs6551184	3	27299001	0	A	G	0.472111	0.998093	36.5039	1.5e-09	0.0077116	0.00119962	41.324	1.3e-10	3_27299001_A_G	rs4973766
rs1899998	3	27307155	0	C	T	0.472276	0.998145	36.5407	1.5e-09	0.00770581	0.00119962	41.2618	1.3e-10	3_27307155_C_T	rs4973766
rs1899997	3	27307196	0	A	G	0.47227	0.998137	36.6304	1.4e-09	0.00771499	0.00119963	41.3592	1.3e-10	3_27307196_A_G	rs4973766
rs9838558	3	27317858	0	C	G	0.471954	0.997342	36.5488	1.5e-09	0.00770831	0.00120013	41.2539	1.3e-10	3_27317858_C_G	rs4973766
rs4957050	5	579066	0	A	C	0.777402	0.996421	40.636	1.8e-10	0.00925986	0.00144066	41.3132	1.3e-10	5_579066_A_C	rs72704791
rs55651840	5	684848	0	G	A	0.81129	0.999451	40.8483	1.6e-10	0.00982883	0.00152943	41.2993	1.3e-10	5_684848_G_A	rs72704791
rs445578	5	103926442	0	T	A	0.560582	0.996217	38.0762	6.8e-10	-0.00776358	0.0012076	41.3311	1.3e-10	5_103926442_T_A	rs254023
rs254024	5	103944020	0	G	T	0.562028	0.999026	38.4705	5.6e-10	-0.00775288	0.0012067	41.2788	1.3e-10	5_103944020_G_T	rs254023
rs2161097	5	103945178	0	C	T	0.562118	0.99917	38.4133	5.7e-10	-0.00774807	0.00120658	41.236	1.3e-10	5_103945178_C_T	rs254023
rs11711853	3	27317846	0	C	A	0.471915	0.997386	36.4818	1.5e-09	0.00770182	0.00120015	41.1826	1.4e-10	3_27317846_C_A	rs4973766
rs72707053	5	684483	0	C	T	0.811189	0.998705	40.6235	1.8e-10	0.00980976	0.00152977	41.1212	1.4e-10	5_684483_C_T	rs72704791
rs2447838	5	103927579	0	C	T	0.560709	0.996204	37.8406	7.7e-10	-0.00774707	0.00120766	41.1512	1.4e-10	5_103927579_C_T	rs254023
rs254025	5	103943938	0	C	G	0.562019	0.998813	38.3097	6e-10	-0.00774091	0.00120685	41.141	1.4e-10	5_103943938_C_G	rs254023
rs2112163	5	103946482	0	C	T	0.560407	0.999643	38.3375	6e-10	-0.00774224	0.00120593	41.2182	1.4e-10	5_103946482_C_T	rs254023
rs9858306	3	27222542	0	T	G	0.461922	0.995314	36.4279	1.6e-09	0.00770493	0.00120266	41.044	1.5e-10	3_27222542_T_G	rs4973766
rs9832789	3	27228834	0	A	C	0.437938	0.995551	36.0753	1.9e-09	0.00774082	0.00120783	41.0734	1.5e-10	3_27228834_A_C	rs4973766
rs7622813	3	27309145	0	C	T	0.472472	0.998168	36.2504	1.7e-09	0.00768243	0.00119957	41.0152	1.5e-10	3_27309145_C_T	rs4973766
rs1579817	3	27310595	0	C	T	0.472619	0.998091	36.3268	1.7e-09	0.00768484	0.00119963	41.0372	1.5e-10	3_27310595_C_T	rs4973766
rs61731455	5	665295	0	A	G	0.800704	0.998753	40.7764	1.7e-10	0.00960814	0.00149992	41.034	1.5e-10	5_665295_A_G	rs72704791
rs2447827	5	103948045	0	C	T	0.562167	0.999645	38.4326	5.7e-10	-0.00773188	0.00120647	41.0714	1.5e-10	5_103948045_C_T	rs254023
rs10252701	7	17280513	0	A	C	0.882098	0.989114	41.9746	9.2e-11	-0.0119525	0.00186731	40.9716	1.5e-10	7_17280513_A_C	rs4410790
rs2100006	3	27273415	0	G	A	0.472323	0.996493	36.1504	1.8e-09	0.00767275	0.00120031	40.8616	1.6e-10	3_27273415_G_A	rs4973766
rs479566	3	27326999	0	T	C	0.472337	0.998881	36.2034	1.8e-09	0.00766977	0.00119919	40.9063	1.6e-10	3_27326999_T_C	rs4973766
rs74553517	5	665671	0	C	T	0.800657	0.997847	40.6418	1.8e-10	0.00959345	0.0015005	40.8769	1.6e-10	5_665671_C_T	rs72704791
rs6551176	3	27230587	0	A	G	0.438015	0.995597	35.7313	2.3e-09	0.00770791	0.00120774	40.7312	1.7e-10	3_27230587_A_G	rs4973766
rs7620772	3	27238349	0	C	G	0.438254	0.996008	35.7803	2.2e-09	0.00771153	0.00120762	40.7778	1.7e-10	3_27238349_C_G	rs4973766
rs11914763	3	27319538	0	A	T	0.472521	0.998342	36.0304	1.9e-09	0.00765729	0.00119942	40.7576	1.7e-10	3_27319538_A_T	rs4973766
rs472146	3	27337379	0	T	C	0.472481	0.99907	36.0654	1.9e-09	0.00765548	0.00119911	40.7596	1.7e-10	3_27337379_T_C	rs4973766
rs481519	3	27327214	0	C	T	0.472389	0.998875	36.0083	2e-09	0.00764841	0.00119919	40.6783	1.8e-10	3_27327214_C_T	rs4973766
rs3103743	3	27327965	0	A	C	0.472402	0.998768	35.9595	2e-09	0.00764409	0.00119924	40.629	1.8e-10	3_27327965_A_C	rs4973766
rs583298	3	27361880	0	T	C	0.473779	0.997668	35.8289	2.2e-09	0.00764536	0.00119959	40.6193	1.8e-10	3_27361880_T_C	rs4973766
rs11955068	5	582324	0	C	T	0.777459	0.998874	40.0761	2.4e-10	0.00917481	0.00143922	40.6389	1.8e-10	5_582324_C_T	rs72704791
rs56410216	5	583216	0	C	A	0.778201	0.996235	40.139	2.4e-10	0.00920633	0.00144298	40.7056	1.8e-10	5_583216_C_A	rs72704791
rs11134148	5	637107	0	C	T	0.798819	0.99949	40.5689	1.9e-10	0.0095273	0.0014936	40.6883	1.8e-10	5_637107_C_T	rs72704791
rs11134149	5	637277	0	A	G	0.798824	0.999618	40.5239	1.9e-10	0.00952139	0.00149357	40.6397	1.8e-10	5_637277_A_G	rs72704791
rs28364691	5	664084	0	G	A	0.800771	0.997492	40.3759	2.1e-10	0.00957817	0.00150098	40.7207	1.8e-10	5_664084_G_A	rs72704791
rs7653795	3	27217080	0	G	A	0.462173	0.993217	36.1155	1.9e-09	0.00767076	0.00120379	40.6048	1.9e-10	3_27217080_G_A	rs4973766
rs1445108	3	27231558	0	G	A	0.438065	0.995697	35.5359	2.5e-09	0.00768877	0.00120771	40.5311	1.9e-10	3_27231558_G_A	rs4973766
rs6551179	3	27236385	0	C	T	0.438093	0.995902	35.6045	2.4e-09	0.00769068	0.00120758	40.56	1.9e-10	3_27236385_C_T	rs4973766
rs633157	3	27335350	0	A	T	0.472605	0.999074	35.8334	2.1e-09	0.00763561	0.00119911	40.5481	1.9e-10	3_27335350_A_T	rs4973766
rs6779140	3	27285151	0	C	T	0.472508	0.996655	35.7002	2.3e-09	0.00763146	0.00120016	40.4329	2e-10	3_27285151_C_T	rs4973766
rs72703050	5	582917	0	A	C	0.777404	0.998839	39.8777	2.7e-10	0.00915296	0.00143901	40.4573	2e-10	5_582917_A_C	rs72704791
rs2370942	3	27286810	0	G	C	0.472675	0.996322	35.5887	2.4e-09	0.00762208	0.00120028	40.3256	2.1e-10	3_27286810_G_C	rs4973766
rs3792720	5	643028	0	T	G	0.800224	0.99974	40.2305	2.3e-10	0.00951945	0.00149755	40.4074	2.1e-10	5_643028_T_G	rs72704791
rs4957081	5	646418	0	G	C	0.800253	0.999903	40.1754	2.3e-10	0.00951237	0.00149752	40.349	2.1e-10	5_646418_G_C	rs72704791
rs55660354	5	684888	0	A	C	0.810292	1	39.9652	2.6e-10	0.00969049	0.00152596	40.328	2.1e-10	5_684888_A_C	rs72704791
rs6787882	3	27270459	0	G	C	0.472408	0.996079	35.518	2.5e-09	0.00761987	0.00120044	40.2913	2.2e-10	3_27270459_G_C	rs4973766
rs2120890	3	27271224	0	C	T	0.472489	0.996133	35.56	2.5e-09	0.00762244	0.00120043	40.3193	2.2e-10	3_27271224_C_T	rs4973766
rs547518	3	27358405	0	A	T	0.473828	0.998013	35.4866	2.6e-09	0.0076156	0.00119939	40.3171	2.2e-10	3_27358405_A_T	rs4973766
rs12522955	5	639231	0	C	A	0.798825	1	40.2166	2.3e-10	0.00947984	0.001494	40.2627	2.2e-10	5_639231_C_A	rs72704791
rs56325086	5	640728	0	G	A	0.800171	0.999399	40.1396	2.4e-10	0.00950608	0.00149767	40.2874	2.2e-10	5_640728_G_A	rs72704791
rs4957080	5	644552	0	G	T	0.800555	0.999077	39.9994	2.5e-10	0.00951109	0.00149897	40.26	2.2e-10	5_644552_G_T	rs72704791
rs72705030	5	645562	0	C	T	0.800315	0.999703	40.1177	2.4e-10	0.00950541	0.00149781	40.2741	2.2e-10	5_645562_C_T	rs72704791
rs4973756	3	27248190	0	C	T	0.449399	0.998139	35.1089	3.1e-09	0.00763454	0.00120375	40.2247	2.3e-10	3_27248190_C_T	rs4973766
rs12517638	5	645484	0	C	T	0.800278	0.999908	40.0272	2.5e-10	0.00949589	0.00149759	40.2058	2.3e-10	5_645484_C_T	rs72704791
rs646157	3	27352143	0	T	A	0.473682	0.998804	35.3446	2.8e-09	0.00759648	0.00119905	40.1378	2.4e-10	3_27352143_T_A	rs4973766
rs11739866	5	636299	0	C	T	0.798982	0.998792	39.9507	2.6e-10	0.00946643	0.0014946	40.1164	2.4e-10	5_636299_C_T	rs72704791
rs1445111	3	27253971	0	C	T	0.449291	0.998417	34.9127	3.4e-09	0.00761417	0.0012036	40.0204	2.5e-10	3_27253971_C_T	rs4973766
rs599298	3	27355115	0	T	C	0.473739	0.998642	35.278	2.9e-09	0.00759034	0.0011991	40.069	2.5e-10	3_27355115_T_C	rs4973766
rs7434	5	660804	0	C	T	0.800459	0.999687	39.7637	2.9e-10	0.0094762	0.00149838	39.9969	2.5e-10	5_660804_C_T	rs72704791
rs2431112	5	103931707	0	G	A	0.559323	0.995648	36.6494	1.4e-09	-0.00763791	0.00120761	40.0032	2.5e-10	5_103931707_G_A	rs254023
rs61580655	5	597564	0	A	G	0.799903	0.999193	39.4763	3.3e-10	0.00945642	0.00149666	39.9217	2.6e-10	5_597564_A_G	rs72704791
rs72705097	5	655067	0	G	A	0.800337	0.999683	39.7302	2.9e-10	0.00946544	0.00149795	39.9287	2.6e-10	5_655067_G_A	rs72704791
rs113896354	5	655438	0	C	T	0.800334	0.999697	39.7313	2.9e-10	0.00946545	0.00149793	39.9298	2.6e-10	5_655438_C_T	rs72704791
rs72707007	5	661856	0	T	C	0.800535	0.999257	39.7538	2.9e-10	0.00947561	0.0014989	39.9639	2.6e-10	5_661856_T_C	rs72704791
rs628802	3	27341789	0	A	G	0.473725	0.998812	35.0919	3.1e-09	0.00756969	0.00119906	39.8544	2.7e-10	3_27341789_A_G	rs4973766
rs7558	5	660491	0	C	T	0.800458	0.999731	39.6544	3e-10	0.00946331	0.00149834	39.89	2.7e-10	5_660491_C_T	rs72704791
rs72703083	5	595365	0	C	T	0.799892	0.999498	39.3405	3.6e-10	0.00944043	0.00149661	39.7892	2.8e-10	5_595365_C_T	rs72704791
rs72703090	5	598314	0	C	T	0.799907	0.999612	39.339	3.6e-10	0.00943999	0.00149656	39.7882	2.8e-10	5_598314_C_T	rs72704791
rs12520279	5	657291	0	T	C	0.800466	0.999639	39.5212	3.2e-10	0.00945122	0.00149837	39.7866	2.8e-10	5_657291_T_C	rs72704791
rs4957082	5	658160	0	G	T	0.800461	0.999628	39.5435	3.2e-10	0.00945388	0.00149838	39.8088	2.8e-10	5_658160_G_T	rs72704791
rs72705102	5	659437	0	T	C	0.800482	0.999885	39.5753	3.2e-10	0.00945116	0.00149829	39.7905	2.8e-10	5_659437_T_C	rs72704791
rs552647	3	27353716	0	C	A	0.473981	0.998745	34.9	3.5e-09	0.00755606	0.00119895	39.7182	2.9e-10	3_27353716_C_A	rs4973766
rs55929359	5	595956	0	C	G	0.799899	0.999511	39.3117	3.6e-10	0.00943708	0.00149662	39.7604	2.9e-10	5_595956_C_G	rs72704791
rs56282020	5	596701	0	T	C	0.799905	0.999556	39.3052	3.6e-10	0.00943641	0.00149663	39.7545	2.9e-10	5_596701_T_C	rs72704791
rs7626742	3	27268398	0	G	T	0.466694	0.995958	34.8	3.7e-09	0.00756427	0.00120112	39.661	3e-10	3_27268398_G_T	rs4973766
rs72703092	5	599269	0	G	A	0.800719	0.995949	39.4478	3.4e-10	0.00945723	0.00150166	39.663	3e-10	5_599269_G_A	rs72704791
rs3762951	5	662613	0	C	G	0.800442	0.998431	39.4704	3.3e-10	0.0094439	0.00149927	39.6775	3e-10	5_662613_C_G	rs72704791
rs6869862	5	103886213	0	T	G	0.519716	0.997289	36.2236	1.8e-09	-0.00755943	0.00119981	39.6965	3e-10	5_103886213_T_G	rs254023
rs616820	3	27356779	0	C	G	0.473899	0.99845	34.82	3.6e-09	0.00754995	0.00119915	39.641	3.1e-10	3_27356779_C_G	rs4973766
rs4957048	5	583442	0	G	A	0.777316	1	39.1355	4e-10	0.00905864	0.00143986	39.5809	3.1e-10	5_583442_G_A	rs72704791
rs57306627	5	597643	0	T	C	0.800077	0.998003	39.2003	3.8e-10	0.00943058	0.001498	39.6326	3.1e-10	5_597643_T_C	rs72704791
rs12487340	3	27208975	0	C	T	0.463694	0.990057	35.292	2.8e-09	0.00757752	0.00120517	39.5326	3.2e-10	3_27208975_C_T	rs4973766
rs571978	3	27344193	0	A	G	0.473551	0.998802	34.7926	3.7e-09	0.00754239	0.00119913	39.5629	3.2e-10	3_27344193_A_G	rs4973766
rs72703079	5	595173	0	T	C	0.802989	0.987138	39.1925	3.8e-10	0.00952594	0.0015148	39.5462	3.2e-10	5_595173_T_C	rs72704791
rs4438849	5	103895102	0	T	G	0.534887	0.999129	36.1168	1.9e-09	-0.0075483	0.00120041	39.5401	3.2e-10	5_103895102_T_G	rs254023
rs1357245	3	27186602	0	C	T	0.542534	0.989997	34.6066	4e-09	-0.00757911	0.00120635	39.4722	3.3e-10	3_27186602_C_T	rs4973766
rs60068988	5	597668	0	T	C	0.800163	0.99863	39.0032	4.2e-10	0.00940929	0.00149803	39.4521	3.4e-10	5_597668_T_C	rs72704791
rs6874138	5	103899596	0	T	C	0.464578	0.999219	36.0184	2e-09	0.00753615	0.0012004	39.4139	3.4e-10	5_103899596_T_C	rs254023
rs12659431	5	103903766	0	G	A	0.465029	0.99925	36.0013	2e-09	0.00753803	0.00120039	39.4341	3.4e-10	5_103903766_G_A	rs254023
rs2004005	3	27266705	0	C	T	0.466368	0.997255	34.3584	4.6e-09	0.00752908	0.00120023	39.3511	3.5e-10	3_27266705_C_T	rs4973766
rs72703075	5	592819	0	C	T	0.81122	0.982394	39.2731	3.7e-10	0.00967937	0.00154256	39.3741	3.5e-10	5_592819_C_T	rs72704791
rs12517345	5	628294	0	G	A	0.798754	0.998804	39.0133	4.2e-10	0.00937481	0.00149394	39.3783	3.5e-10	5_628294_G_A	rs72704791
rs35319957	5	103864338	0	G	C	0.496204	0.996809	36.1913	1.8e-09	-0.00752179	0.00119943	39.3273	3.6e-10	5_103864338_G_C	rs254023
rs1582419	5	103870101	0	T	C	0.496246	0.996758	36.1907	1.8e-09	-0.00752123	0.00119947	39.3188	3.6e-10	5_103870101_T_C	rs254023
rs6551183	3	27281198	0	G	T	0.475258	0.995536	34.6344	4e-09	0.00752462	0.00120045	39.2898	3.7e-10	3_27281198_G_T	rs4973766
rs72703078	5	594987	0	A	C	0.799707	0.999743	38.8808	4.5e-10	0.00937281	0.00149589	39.2593	3.7e-10	5_594987_A_C	rs72704791
rs58599998	5	596087	0	A	G	0.799715	0.999753	38.8724	4.5e-10	0.00937223	0.00149592	39.2529	3.7e-10	5_596087_A_G	rs72704791
rs72703087	5	598029	0	C	T	0.799723	0.999852	38.8597	4.6e-10	0.00937035	0.00149587	39.2397	3.7e-10	5_598029_C_T	rs72704791
rs3749615	5	601485	0	C	T	0.799748	0.999217	38.8363	4.6e-10	0.00937627	0.00149636	39.2632	3.7e-10	5_601485_C_T	rs72704791
rs72705014	5	619815	0	C	G	0.798736	0.999034	38.9037	4.5e-10	0.00935873	0.00149375	39.2536	3.7e-10	5_619815_C_G	rs72704791
rs72705017	5	623733	0	G	A	0.798819	0.999035	38.9719	4.3e-10	0.00935997	0.00149399	39.2513	3.7e-10	5_623733_G_A	rs72704791
rs11955377	5	103861597	0	A	C	0.496233	0.996798	36.1673	1.8e-09	-0.00751583	0.00119944	39.2642	3.7e-10	5_103861597_A_C	rs254023
rs10059133	5	103901424	0	C	T	0.465019	0.999383	35.8249	2.2e-09	0.00752069	0.00120029	39.2592	3.7e-10	5_103901424_C_T	rs254023
rs4957083	5	659343	0	T	C	0.800324	1	38.919	4.4e-10	0.00937735	0.00149793	39.19	3.8e-10	5_659343_T_C	rs72704791
rs10865811	3	27135957	0	G	A	0.539224	0.996522	34.5787	4.1e-09	-0.00752461	0.00120213	39.1802	3.9e-10	3_27135957_G_A	rs4973766
rs12495041	3	27197869	0	G	A	0.537289	0.989997	34.8275	3.6e-09	-0.00754331	0.00120522	39.1733	3.9e-10	3_27197869_G_A	rs4973766
rs111707179	5	593308	0	T	A	0.799512	0.998232	38.7995	4.7e-10	0.00936569	0.00149614	39.1865	3.9e-10	5_593308_T_A	rs72704791
rs67573383	3	27138586	0	C	A	0.539567	0.996678	34.4812	4.3e-09	-0.00751595	0.00120204	39.0957	4e-10	3_27138586_C_A	rs4973766
rs11129262	3	27143287	0	C	G	0.539398	0.995966	34.4442	4.4e-09	-0.00752107	0.00120252	39.1181	4e-10	3_27143287_C_G	rs4973766
rs487930	3	27330335	0	C	A	0.473753	0.998673	34.3395	4.6e-09	0.00749977	0.00119906	39.1215	4e-10	3_27330335_C_A	rs4973766
rs1522151	3	27165174	0	A	G	0.533627	1	34.7823	3.7e-09	-0.00749736	0.0011994	39.0739	4.1e-10	3_27165174_A_G	rs4973766
rs628866	3	27341833	0	C	T	0.473792	0.998659	34.2704	4.8e-09	0.00749603	0.00119915	39.0767	4.1e-10	3_27341833_C_T	rs4973766
rs3749618	5	602650	0	A	G	0.799778	0.998708	38.7001	4.9e-10	0.0093576	0.00149685	39.0817	4.1e-10	5_602650_A_G	rs72704791
rs72703100	5	614291	0	C	T	0.798795	0.998926	38.7912	4.7e-10	0.00933534	0.00149398	39.0456	4.1e-10	5_614291_C_T	rs72704791
rs653465	3	27343644	0	C	T	0.473737	0.998734	34.2306	4.9e-09	0.00749075	0.0011991	39.0244	4.2e-10	3_27343644_C_T	rs4973766
rs580057	3	27345103	0	G	A	0.473614	0.99899	34.2357	4.9e-09	0.00748863	0.00119898	39.0105	4.2e-10	3_27345103_G_A	rs4973766
rs11129266	3	27194165	0	A	T	0.536969	0.989755	34.6283	4e-09	-0.00752344	0.00120525	38.9656	4.3e-10	3_27194165_A_T	rs4973766
rs2193933	5	103892460	0	C	G	0.535285	0.99914	35.5724	2.5e-09	-0.00749434	0.00120042	38.976	4.3e-10	5_103892460_C_G	rs254023
rs11129261	3	27141808	0	T	A	0.54004	0.996052	34.2685	4.8e-09	-0.00750117	0.00120256	38.9088	4.4e-10	3_27141808_T_A	rs4973766
rs7618042	3	27207700	0	C	T	0.464093	0.990852	34.4747	4.3e-09	0.00751038	0.00120448	38.8797	4.5e-10	3_27207700_C_T	rs4973766
rs7641830	3	27208003	0	G	A	0.463927	0.990983	34.4561	4.4e-09	0.0075093	0.0012045	38.8671	4.5e-10	3_27208003_G_A	rs4973766
rs490706	3	27330615	0	G	A	0.473617	0.998733	34.0871	5.3e-09	0.00747709	0.00119909	38.883	4.5e-10	3_27330615_G_A	rs4973766
rs2370925	3	27144161	0	A	G	0.533814	0.996234	34.5846	4.1e-09	-0.00748819	0.00120127	38.8574	4.6e-10	3_27144161_A_G	rs4973766
rs1851366	3	27194844	0	T	C	0.536812	0.989749	34.495	4.3e-09	-0.00751016	0.0012052	38.8311	4.6e-10	3_27194844_T_C	rs4973766
rs10053310	5	595661	0	C	G	0.756705	0.999296	39.21	3.8e-10	0.00869461	0.00139526	38.8319	4.6e-10	5_595661_C_G	rs72704791
rs72703095	5	601789	0	T	C	0.799839	0.999025	38.4487	5.6e-10	0.00932998	0.00149685	38.8515	4.6e-10	5_601789_T_C	rs72704791
rs1592755	5	103893548	0	T	A	0.534939	0.999074	35.4077	2.7e-09	-0.0074838	0.00120052	38.8602	4.6e-10	5_103893548_T_A	rs254023
rs56259835	3	27166202	0	C	T	0.539606	0.998648	34.1537	5.1e-09	-0.00747845	0.0012009	38.78	4.7e-10	3_27166202_C_T	rs4973766
rs6867409	5	103890096	0	C	T	0.534676	0.999249	35.364	2.7e-09	-0.00747838	0.00120033	38.816	4.7e-10	5_103890096_C_T	rs254023
rs1609978	3	27203626	0	G	A	0.542227	0.990101	34.0143	5.5e-09	-0.00750945	0.00120631	38.7524	4.8e-10	3_27203626_G_A	rs4973766
rs1013673	3	27206003	0	A	C	0.535847	0.990299	34.3516	4.6e-09	-0.00750007	0.00120469	38.7597	4.8e-10	3_27206003_A_C	rs4973766
rs11719250	3	27174261	0	G	T	0.534337	0.996959	34.4558	4.4e-09	-0.00747184	0.00120079	38.7186	4.9e-10	3_27174261_G_T	rs4973766
rs11739847	5	609661	0	G	A	0.80007	0.998808	38.3307	6e-10	0.00932028	0.00149777	38.7228	4.9e-10	5_609661_G_A	rs72704791
rs67565656	3	27124194	0	G	A	0.539717	0.996124	34.0194	5.5e-09	-0.00747545	0.00120264	38.6367	5.1e-10	3_27124194_G_A	rs4973766
rs11710255	3	27145591	0	C	G	0.534337	0.996494	34.3045	4.7e-09	-0.00746566	0.00120122	38.627	5.1e-10	3_27145591_C_G	rs4973766
rs1402980	3	27123670	0	G	A	0.539707	0.996076	33.9904	5.5e-09	-0.00747243	0.00120267	38.604	5.2e-10	3_27123670_G_A	rs4973766
rs17349692	3	27124001	0	G	A	0.539698	0.996077	33.9914	5.5e-09	-0.00747252	0.00120266	38.6055	5.2e-10	3_27124001_G_A	rs4973766
rs1402975	3	27125652	0	G	A	0.539595	0.996264	33.977	5.6e-09	-0.00747233	0.00120251	38.6129	5.2e-10	3_27125652_G_A	rs4973766
rs12488954	3	27145162	0	G	A	0.540313	0.995976	33.9768	5.6e-09	-0.00747347	0.00120265	38.6156	5.2e-10	3_27145162_G_A	rs4973766
rs1402972	3	27131168	0	A	G	0.539592	0.996551	33.9236	5.7e-09	-0.00746156	0.00120224	38.5193	5.4e-10	3_27131168_A_G	rs4973766
rs11738281	5	662547	0	T	C	0.797606	0.993613	38.1309	6.6e-10	0.00926843	0.00149466	38.453	5.6e-10	5_662547_T_C	rs72704791
rs1592756	5	103892988	0	A	T	0.535108	0.999318	35.0623	3.2e-09	-0.00744292	0.00120035	38.4476	5.6e-10	5_103892988_A_T	rs254023
rs11750321	5	599196	0	C	T	0.799602	1	38.0772	6.8e-10	0.00927268	0.00149568	38.4355	5.7e-10	5_599196_C_T	rs72704791
rs11739663	5	594083	0	T	C	0.75655	1	38.8212	4.6e-10	0.00863791	0.00139451	38.3686	5.9e-10	5_594083_T_C	rs72704791
rs4703040	5	103879813	0	G	T	0.512475	0.997625	35.2883	2.8e-09	-0.00742516	0.00119892	38.3559	5.9e-10	5_103879813_G_T	rs254023
rs6883536	5	599274	0	G	A	0.757508	0.996478	38.9284	4.4e-10	0.00866095	0.00139885	38.3342	6e-10	5_599274_G_A	rs72704791
rs10854166	19	18652844	0	A	G	0.518645	0.972036	37.9133	7.4e-10	0.00752479	0.00121538	38.3319	6e-10	19_18652844_A_G	rs10854166
rs11129263	3	27143527	0	A	G	0.534104	0.996087	34.0452	5.4e-09	-0.00743299	0.00120146	38.2746	6.1e-10	3_27143527_A_G	rs4973766
rs11129264	3	27146294	0	A	G	0.534214	0.996385	34.0383	5.4e-09	-0.00743294	0.00120126	38.2865	6.1e-10	3_27146294_A_G	rs4973766
rs4482879	5	103878652	0	A	C	0.512599	0.997513	35.0864	3.2e-09	-0.00740259	0.00119902	38.1165	6.7e-10	5_103878652_A_C	rs254023
rs144823843	5	642293	0	A	G	0.797145	0.984401	37.8278	7.7e-10	0.0092466	0.00150088	37.9553	7.2e-10	5_642293_A_G	rs72704791
rs6870957	5	103868240	0	C	G	0.511994	0.997245	34.9056	3.5e-09	-0.00738897	0.00119929	37.9595	7.2e-10	5_103868240_C_G	rs254023
rs1352941	3	27368425	0	C	T	0.499324	0.998584	33.687	6.5e-09	-0.00737251	0.00119727	37.9181	7.4e-10	3_27368425_C_T	rs4973766
rs10474792	5	600058	0	G	A	0.756625	0.999171	38.2905	6.1e-10	0.00858333	0.00139495	37.8612	7.6e-10	5_600058_G_A	rs72704791
rs6887972	5	597274	0	C	G	0.756532	0.99925	38.0052	7.1e-10	0.00856905	0.00139488	37.7393	8.1e-10	5_597274_C_G	rs72704791
rs4515268	5	103874262	0	T	G	0.511415	0.997445	34.632	4e-09	-0.00736437	0.0011992	37.7124	8.2e-10	5_103874262_T_G	rs254023
rs2389763	7	17307847	0	T	C	0.40763	0.99727	40.8661	1.6e-10	0.00749058	0.00122055	37.6635	8.4e-10	7_17307847_T_C	rs4410790
rs416223	5	103991476	0	C	A	0.413155	0.993972	34.8114	3.6e-09	0.00746918	0.00121776	37.6206	8.6e-10	5_103991476_C_A	rs254023
rs13187104	5	103841272	0	T	G	0.511637	0.998119	34.5126	4.2e-09	-0.00734793	0.00119878	37.5709	8.8e-10	5_103841272_T_G	rs254023
rs11958220	5	103843517	0	C	T	0.512351	0.997938	34.5412	4.2e-09	-0.00734859	0.00119885	37.5734	8.8e-10	5_103843517_C_T	rs254023
rs13165289	5	103836995	0	T	C	0.512415	0.997905	34.5439	4.2e-09	-0.00734761	0.00119888	37.5612	8.9e-10	5_103836995_T_C	rs254023
rs7731266	5	103877918	0	G	C	0.512554	0.997656	34.5497	4.2e-09	-0.00734723	0.00119903	37.5483	8.9e-10	5_103877918_G_C	rs254023
rs1363098	5	103867339	0	G	A	0.511828	0.997454	34.4981	4.3e-09	-0.00734764	0.00119925	37.5385	9e-10	5_103867339_G_A	rs254023
rs1363097	5	103875902	0	C	T	0.511683	0.997425	34.4824	4.3e-09	-0.00734652	0.00119923	37.5281	9e-10	5_103875902_C_T	rs254023
rs11747766	5	103838556	0	T	G	0.512343	0.998005	34.489	4.3e-09	-0.00734172	0.00119881	37.5054	9.1e-10	5_103838556_T_G	rs254023
rs67909927	5	103827658	0	A	G	0.512395	0.99757	34.4395	4.4e-09	-0.00733981	0.00119905	37.4707	9.3e-10	5_103827658_A_G	rs254023
rs11747125	5	103847569	0	C	T	0.512288	0.997948	34.4524	4.4e-09	-0.00733836	0.00119881	37.4713	9.3e-10	5_103847569_C_T	rs254023
rs10464007	5	103831500	0	T	A	0.512346	0.997999	34.4356	4.4e-09	-0.00733556	0.00119881	37.4426	9.4e-10	5_103831500_T_A	rs254023
rs7706513	5	103832094	0	G	A	0.512344	0.99797	34.44	4.4e-09	-0.00733588	0.00119881	37.4459	9.4e-10	5_103832094_G_A	rs254023
rs969397	5	103863877	0	G	A	0.511778	0.997431	34.2194	4.9e-09	-0.0073189	0.00119922	37.247	1e-09	5_103863877_G_A	rs254023
rs1363096	5	103876193	0	G	A	0.512613	0.997508	34.2358	4.9e-09	-0.00731741	0.00119913	37.2375	1e-09	5_103876193_G_A	rs254023
rs10040923	5	103822036	0	G	A	0.511705	0.997585	34.1531	5.1e-09	-0.00731501	0.00119903	37.2197	1.1e-09	5_103822036_G_A	rs254023
rs4703307	5	103848762	0	C	A	0.512105	0.998036	34.0607	5.3e-09	-0.00729886	0.00119887	37.0653	1.1e-09	5_103848762_C_A	rs254023
rs325501	5	104007433	0	G	C	0.415729	0.992607	34.3127	4.7e-09	0.00742043	0.00121758	37.1419	1.1e-09	5_104007433_G_C	rs254023
rs542946	3	27349849	0	T	G	0.446299	0.990454	32.5027	1.2e-08	0.00734859	0.00120919	36.9333	1.2e-09	3_27349849_T_G	rs4973766
rs12719532	5	103822938	0	A	G	0.507257	0.993908	33.6789	6.5e-09	-0.00730733	0.00120129	37.0016	1.2e-09	5_103822938_A_G	rs254023
rs12658019	5	103904108	0	A	G	0.452514	0.996519	33.6548	6.6e-09	0.00732886	0.00120402	37.0515	1.2e-09	5_103904108_A_G	rs254023
rs7703746	5	103907337	0	G	A	0.469832	0.999239	33.8023	6.1e-09	0.00728317	0.00119938	36.8744	1.3e-09	5_103907337_G_A	rs254023
rs7634878	3	27241219	0	G	A	0.525142	0.996552	31.5685	1.9e-08	0.00727892	0.00120109	36.7269	1.4e-09	3_27241219_G_A	rs4973766
rs11924009	3	27243567	0	A	G	0.536053	0.997974	31.2643	2.3e-08	0.00726473	0.00120262	36.4904	1.5e-09	3_27243567_A_G	rs4973766
rs325481	5	104000752	0	G	A	0.412933	0.993327	33.8391	6e-09	0.00736405	0.00121816	36.5449	1.5e-09	5_104000752_G_A	rs254023
rs325502	5	104008133	0	G	A	0.43173	0.992421	33.3898	7.5e-09	0.00732949	0.00121174	36.5873	1.5e-09	5_104008133_G_A	rs254023
rs12516404	5	676768	0	G	A	0.84553	0.996821	35.7062	2.3e-09	0.00999664	0.00165834	36.3378	1.7e-09	5_676768_G_A	rs72704791
rs12515615	5	520263	0	G	A	0.804002	0.983636	33.9602	5.6e-09	0.00912927	0.00151849	36.1449	1.8e-09	5_520263_G_A	rs72704791
rs56221686	5	608706	0	C	T	0.919097	0.947304	35.5261	2.5e-09	0.0135354	0.00225454	36.0436	1.9e-09	5_608706_C_T	rs72704791
rs254013	5	103926044	0	C	T	0.547631	0.994988	33.2521	8.1e-09	-0.00723836	0.00120464	36.1046	1.9e-09	5_103926044_C_T	rs254023
rs325500	5	104006667	0	A	G	0.412508	0.993336	33.2578	8.1e-09	0.00730086	0.00121821	35.9173	2.1e-09	5_104006667_A_G	rs254023
rs21126	5	104013782	0	G	A	0.432044	0.992047	32.7266	1.1e-08	0.00725978	0.00121175	35.8937	2.1e-09	5_104013782_G_A	rs254023
rs254011	5	103920770	0	C	A	0.54781	0.994033	32.8645	9.9e-09	-0.00720317	0.00120512	35.7264	2.3e-09	5_103920770_C_A	rs254023
rs11634836	15	75514313	0	T	G	0.719353	0.95835	33.0186	9.1e-09	0.00812042	0.00135925	35.6909	2.3e-09	15_75514313_T_G	rs2472297
rs6880820	5	528609	0	T	C	0.765539	1	33.6272	6.7e-09	0.00842501	0.00141152	35.6259	2.4e-09	5_528609_T_C	rs72704791
rs12658007	5	103904034	0	A	G	0.48352	0.998055	32.6656	1.1e-08	0.00714851	0.00119863	35.5681	2.5e-09	5_103904034_A_G	rs254023
rs12658451	5	103904037	0	T	C	0.483973	0.996731	32.4603	1.2e-08	0.00713114	0.00119939	35.3505	2.8e-09	5_103904037_T_C	rs254023
rs396755	5	104022239	0	C	G	0.428953	0.991676	32.2601	1.3e-08	0.00720797	0.00121269	35.3287	2.8e-09	5_104022239_C_G	rs254023
rs7726839	5	618586	0	A	G	0.736249	0.997997	35.1849	3e-09	0.00803831	0.0013584	35.0166	3.3e-09	5_618586_A_G	rs72704791
rs61375854	6	54546301	0	T	G	0.666305	0.994812	33.1582	8.5e-09	-0.00752992	0.00127228	35.0278	3.3e-09	6_54546301_T_G	rs61375854
rs66506821	3	27121942	0	G	A	0.555776	0.995045	30.6269	3.1e-08	-0.00712829	0.00120695	34.8814	3.5e-09	3_27121942_G_A	rs4973766
rs4295362	5	103908868	0	C	T	0.482593	0.998558	31.9761	1.6e-08	0.00707649	0.00119839	34.8689	3.5e-09	5_103908868_C_T	rs254023
rs959857	5	103909548	0	C	T	0.482604	0.998527	32.0173	1.5e-08	0.00708049	0.00119842	34.9065	3.5e-09	5_103909548_C_T	rs254023
rs768905	5	103909664	0	T	C	0.482603	0.998525	32.0195	1.5e-08	0.00708072	0.00119843	34.9086	3.5e-09	5_103909664_T_C	rs254023
rs4712066	6	54546785	0	C	T	0.667817	0.996544	33.0195	9.1e-09	-0.00751477	0.00127247	34.8766	3.5e-09	6_54546785_C_T	rs61375854
rs73440097	6	54546376	0	G	T	0.667412	0.997512	33.017	9.1e-09	-0.00750615	0.00127143	34.8539	3.6e-09	6_54546376_G_T	rs61375854
rs1421666	5	103908410	0	A	G	0.482536	0.999006	31.8706	1.6e-08	0.00706361	0.00119814	34.7566	3.7e-09	5_103908410_A_G	rs254023
rs16885760	6	54546437	0	C	T	0.66751	0.997598	32.9659	9.4e-09	-0.00750084	0.00127148	34.8015	3.7e-09	6_54546437_C_T	rs61375854
rs4712065	6	54546780	0	T	C	0.66771	0.996783	32.8865	9.8e-09	-0.00749964	0.00127217	34.7526	3.7e-09	6_54546780_T_C	rs61375854
rs1395627	6	54547089	0	G	A	0.667497	0.997638	32.9614	9.4e-09	-0.0074999	0.00127144	34.795	3.7e-09	6_54547089_G_A	rs61375854
rs12657531	5	103903837	0	A	G	0.482611	0.999777	31.8051	1.7e-08	0.00705564	0.00119768	34.7051	3.8e-09	5_103903837_A_G	rs254023
rs7740110	6	54549133	0	C	T	0.667487	0.997446	32.895	9.7e-09	-0.00749235	0.00127152	34.721	3.8e-09	6_54549133_C_T	rs61375854
rs2032790	5	103908246	0	C	T	0.482533	0.999144	31.7751	1.7e-08	0.00705365	0.00119805	34.6639	3.9e-09	5_103908246_C_T	rs254023
rs6903481	6	54537058	0	A	T	0.667417	0.997964	32.822	1e-08	-0.00748326	0.00127123	34.6526	3.9e-09	6_54537058_A_T	rs61375854
rs4320234	5	103895115	0	T	C	0.517295	0.99952	31.7457	1.8e-08	-0.00704806	0.00119779	34.6239	4e-09	5_103895115_T_C	rs254023
rs1833514	5	103896130	0	T	C	0.517295	0.999529	31.7494	1.8e-08	-0.00704844	0.00119779	34.6278	4e-09	5_103896130_T_C	rs254023
rs1421667	5	103907606	0	G	A	0.482509	0.999854	31.7423	1.8e-08	0.00704751	0.00119768	34.6252	4e-09	5_103907606_G_A	rs254023
rs6903770	6	54537124	0	C	T	0.667413	0.997944	32.8079	1e-08	-0.00748182	0.00127123	34.6389	4e-09	6_54537124_C_T	rs61375854
rs12528779	6	54536407	0	T	A	0.667399	0.998076	32.7279	1.1e-08	-0.00747189	0.00127114	34.5523	4.1e-09	6_54536407_T_A	rs61375854
rs4521446	5	103897758	0	T	C	0.517357	0.999623	31.6443	1.9e-08	-0.00703828	0.00119773	34.5313	4.2e-09	5_103897758_T_C	rs254023
rs6596578	5	103899178	0	A	G	0.517353	0.999698	31.6277	1.9e-08	-0.00703638	0.00119769	34.5151	4.2e-09	5_103899178_A_G	rs254023
rs6891820	5	103903148	0	A	G	0.482597	0.999802	31.6375	1.9e-08	0.00703754	0.00119768	34.5269	4.2e-09	5_103903148_A_G	rs254023
rs12515429	5	103905275	0	C	T	0.482504	0.999897	31.6291	1.9e-08	0.0070368	0.00119765	34.5216	4.2e-09	5_103905275_C_T	rs254023
rs10484989	6	54536877	0	G	C	0.667417	0.99793	32.7187	1.1e-08	-0.00747152	0.00127124	34.5431	4.2e-09	6_54536877_G_C	rs61375854
rs7706353	5	103895016	0	C	T	0.517347	0.999655	31.6184	1.9e-08	-0.00703552	0.00119771	34.5055	4.3e-09	5_103895016_C_T	rs254023
rs10064425	5	103899690	0	T	C	0.48263	0.999745	31.5965	1.9e-08	0.00703497	0.00119767	34.5024	4.3e-09	5_103899690_T_C	rs254023
rs2403284	5	103906073	0	C	T	0.482526	0.999865	31.5885	1.9e-08	0.0070324	0.00119766	34.478	4.3e-09	5_103906073_C_T	rs254023
rs6865511	5	103902180	0	C	T	0.482609	0.999821	31.5419	2e-08	0.0070278	0.00119766	34.4329	4.4e-09	5_103902180_C_T	rs254023
rs11242522	5	103904914	0	T	C	0.482473	0.99965	31.5473	1.9e-08	0.00702932	0.00119772	34.444	4.4e-09	5_103904914_T_C	rs254023
rs11242523	5	103905025	0	T	A	0.482483	0.999856	31.5176	2e-08	0.00702638	0.00119766	34.4189	4.4e-09	5_103905025_T_A	rs254023
rs1421668	5	103902958	0	C	T	0.482608	0.999814	31.5046	2e-08	0.0070245	0.00119765	34.4008	4.5e-09	5_103902958_C_T	rs254023
rs12526949	6	54536190	0	C	T	0.667389	0.997996	32.6096	1.1e-08	-0.00745639	0.00127119	34.4061	4.5e-09	6_54536190_C_T	rs61375854
rs931889	6	54528507	0	C	T	0.669933	0.999008	32.8074	1e-08	-0.0074635	0.0012731	34.3685	4.6e-09	6_54528507_C_T	rs61375854
rs1983140	6	54577687	0	A	G	0.684281	0.993651	32.7607	1e-08	-0.00755631	0.00129057	34.2815	4.8e-09	6_54577687_A_G	rs61375854
rs1948954	6	54562935	0	T	C	0.68207	0.994448	32.6015	1.1e-08	-0.0075338	0.00128769	34.2297	4.9e-09	6_54562935_T_C	rs61375854
rs2048113	6	54577218	0	A	C	0.684458	0.993287	32.7214	1.1e-08	-0.00755503	0.00129104	34.2448	4.9e-09	6_54577218_A_C	rs61375854
rs16885654	6	54509899	0	G	A	0.670189	0.999512	32.5409	1.2e-08	-0.0074457	0.00127322	34.1983	5e-09	6_54509899_G_A	rs61375854
rs1848188	6	54525653	0	C	G	0.670122	0.999265	32.5379	1.2e-08	-0.00744367	0.00127318	34.182	5e-09	6_54525653_C_G	rs61375854
rs12660952	6	54526440	0	G	T	0.670123	0.999189	32.5564	1.2e-08	-0.00744608	0.00127321	34.2023	5e-09	6_54526440_G_T	rs61375854
rs73442093	6	54577109	0	T	G	0.684333	0.993726	32.6467	1.1e-08	-0.00754517	0.00129061	34.1782	5e-09	6_54577109_T_G	rs61375854
rs9800013	5	542023	0	A	G	0.767075	0.996666	33.8567	5.9e-09	0.00827868	0.00141689	34.1388	5.1e-09	5_542023_A_G	rs72704791
rs7753964	6	54509720	0	A	G	0.670106	1	32.4528	1.2e-08	-0.00743821	0.00127305	34.1388	5.1e-09	6_54509720_A_G	rs61375854
rs78104758	6	54524010	0	T	C	0.670116	0.999329	32.4697	1.2e-08	-0.0074354	0.00127315	34.1077	5.2e-09	6_54524010_T_C	rs61375854
rs872135	6	54525093	0	G	C	0.670119	0.999299	32.4811	1.2e-08	-0.00743662	0.00127316	34.1182	5.2e-09	6_54525093_G_C	rs61375854
rs12664014	6	54514580	0	G	A	0.670142	0.999471	32.4341	1.2e-08	-0.00743346	0.00127316	34.0889	5.3e-09	6_54514580_G_A	rs61375854
rs12528652	6	54527769	0	A	G	0.683489	0.998185	32.6575	1.1e-08	-0.00750892	0.00128724	34.0281	5.4e-09	6_54527769_A_G	rs61375854
rs60999808	6	54544029	0	C	A	0.668706	0.996497	32.27	1.3e-08	-0.00742537	0.00127312	34.0171	5.5e-09	6_54544029_C_A	rs61375854
rs2122127	2	68445354	0	A	G	0.607895	0.99719	32.7297	1.1e-08	0.00716293	0.0012294	33.9465	5.7e-09	2_68445354_A_G	rs2122127
rs13340326	4	3752734	0	G	T	0.74798	0.969819	33.8025	6.1e-09	-0.00814793	0.00139874	33.9331	5.7e-09	4_3752734_G_T	rs13143189
rs17156671	5	103905410	0	A	C	0.482334	1	31.0919	2.5e-08	0.00697906	0.00119779	33.9494	5.7e-09	5_103905410_A_C	rs254023
rs16885682	6	54528450	0	G	A	0.683456	0.997974	32.4869	1.2e-08	-0.00749036	0.00128733	33.8551	5.9e-09	6_54528450_G_A	rs61375854
rs4715466	6	54529256	0	T	A	0.683513	0.998077	32.4811	1.2e-08	-0.00748785	0.00128732	33.8331	6e-09	6_54529256_T_A	rs61375854
rs541689	6	54506752	0	C	G	0.32763	0.999081	31.9269	1.6e-08	0.00740923	0.00127558	33.7387	6.3e-09	6_54506752_C_G	rs61375854
rs12053466	2	68423492	0	A	T	0.608361	0.997044	32.5858	1.1e-08	0.00713891	0.00122972	33.7019	6.4e-09	2_68423492_A_T	rs2122127
rs60734212	5	103812660	0	G	A	0.513093	0.998051	31.1711	2.4e-08	-0.00696109	0.00119892	33.7113	6.4e-09	5_103812660_G_A	rs254023
rs1472254	3	27427225	0	A	G	0.471241	0.998256	31.3568	2.1e-08	0.00696774	0.00120109	33.6538	6.6e-09	3_27427225_A_G	rs4973766
rs10807476	6	54527066	0	G	A	0.683637	0.998264	32.2164	1.4e-08	-0.00746618	0.00128737	33.6352	6.6e-09	6_54527066_G_A	rs61375854
rs28694054	2	68405545	0	A	G	0.607816	0.997775	32.3607	1.3e-08	0.0071252	0.00122892	33.6158	6.7e-09	2_68405545_A_G	rs2122127
rs55726539	5	526807	0	G	A	0.722939	0.967783	30.9628	2.6e-08	0.00785547	0.00135487	33.6163	6.7e-09	5_526807_G_A	rs72704791
rs6467447	7	132525147	0	C	T	0.37173	0.994044	34.5048	4.3e-09	0.00720042	0.00124211	33.6045	6.8e-09	7_132525147_C_T	rs6467447
rs12944041	17	8073097	0	G	A	0.449877	0.992807	37.0928	1.1e-09	0.00700048	0.00120774	33.5975	6.8e-09	17_8073097_G_A	rs12944041
rs1873379	15	75498744	0	G	C	0.714552	1	31.4185	2.1e-08	0.00767695	0.00132535	33.5517	6.9e-09	15_75498744_G_C	rs2472297
rs687	2	68415767	0	G	A	0.608076	0.997156	32.283	1.3e-08	0.00711924	0.00122925	33.5417	7e-09	2_68415767_G_A	rs2122127
rs62145958	2	68426902	0	A	C	0.608406	0.996983	32.3815	1.3e-08	0.00712139	0.0012298	33.5321	7e-09	2_68426902_A_C	rs2122127
rs35313049	5	103806932	0	T	C	0.512063	0.997861	30.9397	2.7e-08	-0.00694434	0.00119896	33.5467	7e-09	5_103806932_T_C	rs254023
rs60620861	2	68426291	0	T	C	0.608421	0.997009	32.3455	1.3e-08	0.00711791	0.00122979	33.5	7.1e-09	2_68426291_T_C	rs2122127
rs59883268	2	68426527	0	T	G	0.60842	0.996973	32.3542	1.3e-08	0.00711817	0.0012298	33.5019	7.1e-09	2_68426527_T_G	rs2122127
rs511441	6	54505740	0	G	A	0.327718	0.998761	31.676	1.8e-08	0.00738397	0.00127578	33.4985	7.1e-09	6_54505740_G_A	rs61375854
rs12527767	6	54513067	0	G	A	0.667376	0.998282	31.8285	1.7e-08	-0.0073599	0.00127136	33.5127	7.1e-09	6_54513067_G_A	rs61375854
rs6749303	2	68417219	0	G	A	0.608102	0.997057	32.2319	1.4e-08	0.00711259	0.00122933	33.4748	7.2e-09	2_68417219_G_A	rs2122127
rs2278790	2	68445569	0	G	A	0.608248	0.997158	32.3858	1.3e-08	0.00711354	0.00122968	33.4647	7.3e-09	2_68445569_G_A	rs2122127
rs7319172	13	67380168	0	G	A	0.432439	0.997209	33.4828	7.2e-09	-0.00699888	0.00121032	33.439	7.4e-09	13_67380168_G_A	rs7319172
rs2860455	5	103802354	0	C	A	0.5132	0.998088	30.8766	2.7e-08	-0.00692955	0.00119891	33.4072	7.5e-09	5_103802354_C_A	rs254023
rs12187898	5	103939674	0	C	T	0.478573	0.997786	30.7087	3e-08	0.00693095	0.00119935	33.396	7.5e-09	5_103939674_C_T	rs254023
rs13395335	2	68426624	0	G	A	0.606869	0.997444	31.6844	1.8e-08	0.00709773	0.00122864	33.3726	7.6e-09	2_68426624_G_A	rs2122127
rs534685	6	54503147	0	A	T	0.32779	0.998932	31.558	1.9e-08	0.00737004	0.0012756	33.3818	7.6e-09	6_54503147_A_T	rs61375854
rs590594	6	54505127	0	T	C	0.32779	0.998931	31.5598	1.9e-08	0.00737026	0.0012756	33.3837	7.6e-09	6_54505127_T_C	rs61375854
rs6881764	5	103810310	0	G	A	0.512255	0.998101	30.7282	3e-08	-0.00691957	0.00119881	33.3166	7.8e-09	5_103810310_G_A	rs254023
rs34659714	6	54532749	0	C	T	0.681187	0.997799	31.7755	1.7e-08	-0.00741779	0.00128485	33.3307	7.8e-09	6_54532749_C_T	rs61375854
rs953896	6	54531949	0	C	A	0.681223	0.997731	31.7318	1.8e-08	-0.00741452	0.00128493	33.2972	7.9e-09	6_54531949_C_A	rs61375854
rs11966577	6	54531993	0	G	C	0.681175	0.997545	31.7359	1.8e-08	-0.00741419	0.00128501	33.2902	7.9e-09	6_54531993_G_C	rs61375854
rs35914637	5	677348	0	T	C	0.74377	0.994078	31.8079	1.7e-08	0.00792694	0.00137396	33.286	8e-09	5_677348_T_C	rs72704791
rs1280710	6	54499600	0	A	C	0.32781	0.99887	31.4638	2e-08	0.00735804	0.00127562	33.2723	8e-09	6_54499600_A_C	rs61375854
rs1298465	6	54503884	0	A	T	0.327809	0.998902	31.4517	2e-08	0.00735865	0.00127561	33.2781	8e-09	6_54503884_A_T	rs61375854
rs13402188	2	68428283	0	G	C	0.606771	0.997686	31.5887	1.9e-08	0.0070849	0.00122845	33.2623	8.1e-09	2_68428283_G_C	rs2122127
rs6733029	2	68434157	0	T	C	0.607675	0.996726	32.0965	1.5e-08	0.00708815	0.00122926	33.2491	8.1e-09	2_68434157_T_C	rs2122127
rs694600	6	54504578	0	C	T	0.327798	0.998914	31.4313	2.1e-08	0.00735518	0.00127561	33.247	8.1e-09	6_54504578_C_T	rs61375854
rs784257	18	53397199	0	T	C	0.187607	0.987731	30.5438	3.3e-08	-0.00890228	0.00154365	33.2586	8.1e-09	18_53397199_T_C	rs784257
rs7593613	2	68483396	0	A	T	0.609362	0.996494	31.9077	1.6e-08	0.00709393	0.00123052	33.2349	8.2e-09	2_68483396_A_T	rs2122127
rs12187903	5	103939770	0	C	T	0.478614	0.997938	30.4471	3.4e-08	0.0069126	0.00119928	33.2231	8.2e-09	5_103939770_C_T	rs254023
rs10948839	6	54533327	0	T	G	0.681141	0.997156	31.688	1.8e-08	-0.00740991	0.0012853	33.2368	8.2e-09	6_54533327_T_G	rs61375854
rs76307456	15	75492307	0	C	T	0.714586	0.992836	30.9311	2.7e-08	0.00766178	0.00132941	33.2156	8.2e-09	15_75492307_C_T	rs2472297
rs2018142	5	103941793	0	C	A	0.478302	0.998849	30.7471	2.9e-08	0.00689833	0.00119898	33.1029	8.7e-09	5_103941793_C_A	rs254023
rs4973730	3	27519195	0	G	A	0.471998	0.9967	30.9002	2.7e-08	0.00691195	0.00120167	33.0848	8.8e-09	3_27519195_G_A	rs4973766
rs1280725	6	54493586	0	C	A	0.32794	0.998898	31.2712	2.2e-08	0.00733751	0.00127539	33.0986	8.8e-09	6_54493586_C_A	rs61375854
rs950077	6	54531708	0	A	G	0.682343	0.992618	31.4537	2e-08	-0.00741785	0.00128948	33.0924	8.8e-09	6_54531708_A_G	rs61375854
rs4519508	2	68479576	0	G	A	0.610057	0.996553	31.9848	1.6e-08	0.00707843	0.00123085	33.0721	8.9e-09	2_68479576_G_A	rs2122127
rs1822469	2	68454685	0	C	T	0.610122	0.997086	31.7456	1.8e-08	0.0070709	0.00123051	33.0202	9.1e-09	2_68454685_C_T	rs2122127
rs4957106	5	699427	0	A	G	0.811906	0.936494	32.6325	1.1e-08	0.00907747	0.0015794	33.0329	9.1e-09	5_699427_A_G	rs72704791
rs56298737	5	698433	0	A	G	0.812057	0.938794	32.6024	1.1e-08	0.00906839	0.00157828	33.0137	9.2e-09	5_698433_A_G	rs72704791
rs2861818	2	68482348	0	T	C	0.609387	0.996455	31.6553	1.8e-08	0.00706589	0.00123055	32.9711	9.4e-09	2_68482348_T_C	rs2122127
rs7619833	3	27509714	0	G	C	0.471923	0.997298	30.7024	3e-08	0.00689508	0.00120133	32.9425	9.5e-09	3_27509714_G_C	rs4973766
rs1363101	5	103941070	0	T	G	0.479138	0.998839	30.5318	3.3e-08	0.00688183	0.00119891	32.9486	9.5e-09	5_103941070_T_G	rs254023
rs6546367	2	68495243	0	G	A	0.608857	0.997912	31.2608	2.3e-08	0.00705087	0.00122999	32.861	9.9e-09	2_68495243_G_A	rs2122127
rs1494420	3	27487705	0	C	T	0.471909	0.998281	30.6837	3e-08	0.00688299	0.00120077	32.8574	9.9e-09	3_27487705_C_T	rs4973766
SNP: rs number;CHR: chromosome; BP: physical (base pair) position; GENPOS: genetic position either from bim file or interpolated from genetic map; ALLELE1: first allele in bim file (usually the minor allele), used as the effect allele; ALLELE0: second allele in bim file, used as the reference allele; A1FREQ: frequency of first allele; BETA: effect size from BOLT-LMM approximation to infinitesimal…
