# Supplementary material for: GWAS for urinary sodium and potassium excretion highlights pathways shared with cardiovascular traits
Source: Nat Commun. 2019 Aug 13;10:3653. doi: 10.1038/s41467-019-11451-y (PMC6692500; doi:10.1038/s41467-019-11451-y)
Supplement: Supplementary file 3 — Supplementary Dataset 3 [file 41467_2019_11451_MOESM3_ESM.xlsx]

## Sheet: Supplementary Data 3
Supplementary Data 3: Urinary sodium lead SNPs and corresponding regional SNPs at P<1×10-8.
Strongest SNP in Locus	Gene nearest to Locus	Complete Gene name	chr_pos	chr_pos_a1_a2	*proxy r2>80	R.squared	Distance	ALLELE1	ALLELE0	A1FREQ	INFO	CHISQ_LINREG	P_LINREG	BETA	SE	CHISQ_BOLT_LMM_INF	P_BOLT_LMM_INF	Inlocus
rs838133	MLIP	muscular LMNA interacting protein	19_49259529	19_49259529_A_G	NA	NA	NA	A	G	0.450813	0.938588	87.783	7.3e-21	-0.0133353	0.00127931	108.657	1.9e-25	rs838133,rs1231281,rs418464,rs973579,rs838144,rs838147,rs380743,rs452270,rs427248,rs439523,rs12979278,rs12978750,rs12978752,rs33988101,rs4002471,rs2287922,rs11672900,rs11882796,rs660745,rs11666792,rs12979891,rs8112983,rs11878908,rs2287921,rs8103840,rs739320,rs479486,rs12978499,rs12979144,rs8106205,rs28400014,rs11667321,rs281408,rs412712,rs603985,rs485073,rs485186,rs602662,rs838145,rs56066508,rs17…
rs11642015	FTO	FTO, alpha-ketoglutarate dependent dioxygenase	16_53802494	16_53802494_C_T	rs1421085	1	1540	C	T	0.596261	0.99969	87.9728	6.6e-21	-0.0124196	0.0012606	97.0651	6.7e-23	rs11642015,rs62048402,rs1558902,rs55872725,rs56094641,rs1421085,rs8047587,rs9923544,rs1558901,rs1121980,rs11075985,rs1421086,rs9923147,rs9939973,rs9940278,rs9940646,rs9930333,rs9930397,rs9937053,rs9940128,rs9937354,rs9928094,rs7193144,rs7187250,rs9972653,rs62033399,rs62033400,rs8043757,rs17817497,rs8063057,rs8051591,rs8050136,rs17817449,rs9935401,rs66908032,rs72803697,rs62033403,rs62033404,rs7206…
rs2472297	CYP1A1	cytochrome P450 family 1 subfamily A member 1	15_75027880	15_75027880_C_T	NA	NA	NA	C	T	0.737388	1	95.6584	1.4e-22	0.0138093	0.0014017	97.0586	6.7e-23	rs2472297,rs2470893,rs35107470,rs12148513,rs4886649,rs11638576,rs12900072,rs4886648,rs12898551,rs12910558,rs3812945,rs7181261,rs35116156,rs113362184,rs2304902,rs4886417,rs35556055,rs62029217,rs35882241,rs4886413,rs34307821,rs34799293,rs35103257
rs1260326	GCKR	glucokinase regulator	2_27730940	2_27730940_T_C	rs4665972	0.920362	132843	T	C	0.395664	1	86.9993	1.1e-20	0.0117743	0.00126163	87.0982	1e-20	rs1260326,rs780094,rs4665972,rs780093,rs13010586,rs12989678,rs6760250,rs1919127,rs10179872,rs10169065,rs7570476,rs10208529,rs7577311,rs4665987,rs12995461,rs4665382,rs4665988,rs4665383,rs13022873,rs3749147,rs12473139,rs1919128,rs4666002,rs4665991,rs12467476,rs12464616,rs12478841,rs13002853,rs2384656,rs13020949,rs74175068,rs34016998,rs12987055,rs34502053,rs4665985,rs2272406,rs13021208,rs12998770,rs…
rs34783010	MIR642A	microRNA 642a	19_46180414	19_46180414_G_T	rs2238691	1	1371	G	T	0.805604	1	79.9576	3.8e-19	0.0134311	0.00156083	74.0476	7.6e-18	rs34783010,rs1800437,rs2238691,rs11672660,rs10423928,rs2287019,rs61373376,rs74889068
rs2504671	PKHD1	PKHD1, fibrocystin/polyductin	6_51205577	6_51205577_C_A	rs994270	1	17790	C	A	0.765267	0.995478	75.108	4.5e-18	0.0125233	0.00146135	73.4392	1e-17	rs2504671,rs1327285,rs2504706,rs2465044,rs2504711,rs1409891,rs2465022,rs2478884,rs2504714,rs994270,rs2465017,rs10948623,rs12199064,rs12190153,rs9381993,rs2397047,rs10807427,rs12193744,rs10948636,rs10948627,rs6928041,rs12211863,rs12205800,rs12529828,rs10948624,rs4506045,rs4997737,rs9367438,rs9367439,rs2397051,rs12214769,rs10948628,rs10948630,rs4489153,rs7450526,rs10807425,rs10948629,rs12192154,rs2…
rs4410790	AHR	aryl hydrocarbon receptor	7_17284577	7_17284577_T_C	rs6946935	0.866087	3541	T	C	0.368736	1	76.7959	1.9e-18	0.0108651	0.00128176	71.8541	2.3e-17	rs4410790,rs6968554,rs2106727,rs6968865,rs2389763,rs12670403,rs10950655,rs12531256,rs4489213,rs10275488,rs17137472,rs2214210,rs10252701,rs10277582,rs10281571,rs10807783
rs12581220	LINC02424	long intergenic non-protein coding RNA 2424	12_78773251	12_78773251_C_T	rs755170	0.814888	5977	C	T	0.685554	0.989622	61.0327	5.6e-15	0.01034	0.00133913	59.6207	1.2e-14	rs12581220,rs12316443,rs11109717,rs726184,rs12318839,rs58800797,rs7980124,rs1848968,rs7301847,rs28469214,rs755170,rs7133393,rs10860383,rs7311712,rs10777939,rs7132557,rs7310563,rs10860385,rs11109585,rs10860377,rs1430556,rs11109504,rs1900931,rs12305059,rs61936677,rs10506785,rs10437886,rs1848969,rs11109480,rs10860384,rs7313195,rs10860353,rs10777963,rs57810677,rs10860332
rs7072776	LINC01114	long intergenic non-protein coding RNA 1114	10_22032942	10_22032942_A_G	NA	NA	NA	A	G	0.278052	0.990286	55.5773	9e-14	0.0103876	0.00138554	56.2065	6.5e-14	rs7072776,rs792452,rs12253527,rs2807978,rs10740991,rs1086899,rs3951780,rs10828266,rs7082663,rs2666768,rs1802669,rs6482191,rs6482190,rs4748768,rs6650129,rs6650130,rs2807985,rs10508639,rs806774,rs2941732,rs7910002,rs61850044,rs2666761,rs1243188,rs2859622,rs2807984,rs2793353,rs2807966,rs11012737,rs1243194,rs792454,rs7905967,rs2941733,rs2807979,rs2666759,rs12783517,rs1243187,rs1243182,rs2666750,rs709…
rs816366	LOC105378330	uncharacterized LOC105378330	6_53995504	6_53995504_C_T	rs499594	1	19591	C	T	0.311488	0.998812	56.7837	4.9e-14	0.00987744	0.00133491	54.7498	1.4e-13	rs816366,rs816368,rs816369,rs631441,rs562626,rs816372,rs816380,rs816376,rs499594,rs2754783,rs843828,rs816377,rs1150877,rs1321886,rs816374,rs2754782,rs1321885,rs2754781,rs2797424,rs843826,rs1342829,rs2754779,rs4715446,rs2797428,rs9474745,rs2797427,rs1407233,rs768358,rs2797430,rs2754790,rs1340661,rs1321884,rs816388,rs677434,rs12193888,rs2797429,rs2797426,rs4715447,rs1407234,rs1280851,rs2754809,rs94…
rs33951980	MLXIPL	MLX interacting protein like	7_73029437	7_73029437_C_T	rs35332062	0.924413	17395	C	T	0.870155	0.99729	47.6415	5.1e-12	0.0131522	0.00183904	51.1468	8.6e-13	rs33951980,rs71556736,rs34060476,rs7784668,rs34958196,rs34430945,rs13234805,rs799166,rs799165,rs13240065,rs13235543,rs78815801,rs79624003,rs35332062,rs13246993,rs13234131,rs13234378,rs3812316,rs34062580,rs13229619,rs6460047,rs7805504,rs7800944,rs34166762,rs7798357,rs7785479,rs2074768,rs35814008,rs62466318,rs7786376,rs7777102,rs6968170,rs35732917,rs61010704,rs6975495,rs35493868,rs7808877,rs5574770…
rs2761589	DCDC1	doublecortin domain containing 1	11_31311429	11_31311429_C_G	rs35150053	1	5911	C	G	0.370028	0.996017	48.4035	3.5e-12	-0.00897032	0.00128298	48.8854	2.7e-12	rs2761589,rs2985140,rs2774403,rs2183484,rs2210144,rs11031342,rs2616799,rs12222329,rs2761594,rs2150212,rs11031327,rs12788257,rs11031332,rs7116443,rs2774402,rs10835758,rs10835759,rs11031330,rs3802915,rs11031337,rs10835756,rs7113880,rs7121949,rs1929019,rs1475558,rs12796587,rs11031338,rs2210143,rs2756191,rs176373,rs2150213,rs208063,rs11031323,rs11031324,rs158144,rs286649,rs208072,rs208067,rs208066,rs…
rs1513481	MIR128-2	microRNA 128-2	3_35783535	3_35783535_C_T	NA	NA	NA	C	T	0.689494	0.989656	39.3409	3.6e-10	-0.00933683	0.00134101	48.4768	3.3e-12	rs1513481,rs11706708,rs7625602,rs4678789,rs6788752,rs34041533,rs11129660,rs3092,rs6799641,rs11129661,rs3796183,rs12496573,rs13097918,rs2359774,rs11129657,rs10490869,rs13078110,rs2197728,rs2012153,rs9867068,rs7612999,rs1513473,rs6550367,rs10446457,rs10490873,rs3796182,rs7349575,rs34171898,rs73059205,rs3772396,rs55756117,rs4678796,rs3213954,rs6779091,rs4678797,rs35005052,rs17201669,rs17201676,rs467…
rs4788415	DCTPP1	dCTP pyrophosphatase 1	16_30439309	16_30439309_T_C	NA	NA	NA	T	C	0.0966553	0.951989	55.84	7.9e-14	-0.0148019	0.00214015	47.8352	4.6e-12	rs4788415,rs148788997,rs4433823,rs6565174,rs8061772,rs4787644,rs4232893,rs6565186
rs13163314	HTR4	5-hydroxytryptamine receptor 4	5_148089587	5_148089587_C_T	rs7718324	0.915932	45321	C	T	0.768009	0.995107	47.6892	5e-12	0.0100176	0.00146711	46.6232	8.6e-12	rs13163314,rs13188076,rs62387983,rs36042399,rs7718324,rs11531420,rs1465406,rs1465405,rs13156027,rs13177716,rs58862611,rs7720668,rs34598101,rs56229761,rs61512981,rs34643523,rs35265258,rs13164335,rs34285995,rs888963,rs33976732,rs62387966,rs6885118,rs13173350,rs13161058,rs888961,rs56333659,rs57644098,rs55683014,rs1862341,rs1862340,rs56210805,rs13177014,rs36055891,rs13156592,rs35603339,rs55926330,rs5…
rs1957111	PRKD1	protein kinase D1	14_29781178	14_29781178_C_T	rs117787553	1	70725	C	T	0.947639	0.988289	53.9477	2.1e-13	-0.018951	0.00278568	46.2809	1e-11	rs1957111,rs2224267,rs147593816,rs139279213,rs118094146,rs74040467,rs74040468,rs1951287,rs112972262,rs80151817,rs80187352,rs117787553,rs4344637,rs1956241,rs1210127,rs74040482,rs74040481,rs74040476,rs1191519,rs78630402,rs74040483,rs1191522,rs1191523,rs4267219,rs11845924,rs11850607,rs11850677,rs1555417,rs11849844,rs74040471,rs78766459,rs74040475,rs11845297,rs74040478,rs74040479,rs59484001,rs1116105…
rs117287096	CYP2A6	cytochrome P450 family 2 subfamily A member 6	19_41341413	19_41341413_G_A	rs144002017	1	6144	G	A	0.977611	1	43.4698	4.3e-11	-0.0281939	0.00418133	45.4655	1.6e-11	rs117287096,rs28399462,rs143200968,rs28399459,rs145580088,rs28399448,rs72549444,rs117683060,rs141949574,rs55921593,rs28399442,rs79600176,rs4803380,rs4803378,rs186051747,rs117540499,rs143303864,rs144002017,rs73931391,rs112292570,rs28399443,rs117422348
rs7924036	LINC01415	long intergenic non-protein coding RNA 1415	10_65191645	10_65191645_G_T	rs10761753	0.960384	29742	G	T	0.49654	0.999646	48.4088	3.5e-12	0.00833585	0.00123695	45.4147	1.6e-11	rs7924036,rs12245149,rs9919429,rs6479905,rs7898861,rs7085018,rs2163188,rs4486511,rs7082470,rs10761785,rs10761782,rs10761778,rs7075901,rs10509189,rs9971352,rs10761779,rs7920036,rs7920058,rs2393984,rs7919685,rs7070761,rs2393977,rs10740129,rs12247907,rs7915779,rs10761716,rs7896783,rs10822168,rs10761784,rs10740134,rs10761758,rs7909269,rs7077580,rs10761772,rs10761750,rs7923609,rs7085621,rs10740125,rs1…
rs784257	RARB	retinoic acid receptor beta	18_53397199	18_53397199_T_C	rs613872	0.87531	186897	T	C	0.187588	0.987731	40.4804	2e-10	-0.0105962	0.00159303	44.2435	2.9e-11	rs784257,rs784256,rs613872
rs7140993	MLLT10	MLLT10, histone lysine methyltransferase DOT1L cofactor	14_27107166	14_27107166_G_A	rs34924537	1	11115	G	A	0.738394	0.991361	40.1108	2.4e-10	0.00933716	0.00141075	43.8056	3.6e-11	rs7140993,rs1950400,rs7154726,rs11627577,rs11159938,rs8010856,rs1010727,rs2332816,rs2332818,rs4297616,rs11623268,rs56303656,rs12050219,rs17111488,rs56150758,rs12589509,rs1950406,rs2224038,rs1950404,rs1950403,rs2207556,rs6575068,rs2224039,rs1955822,rs1950402,rs1950408,rs1115240,rs12050159,rs12433692,rs6575069,rs963778,rs17111366,rs2064939,rs11159880,rs1950412,rs1950411,rs1245192,rs11159900,rs17817…
rs7334078	LINC01288	long intergenic non-protein coding RNA 1288	13_99120484	13_99120484_T_C	rs2031237	0.950893	11165	T	C	0.717026	0.993985	46.7344	8.1e-12	0.0090649	0.00137467	43.484	4.3e-11	rs7334078,rs7988345,rs17574378,rs7985565,rs745638,rs4294654,rs3803253,rs9584854,rs12869627,rs745639,rs6491427,rs7139583,rs7339274,rs9584855,rs9630321,rs7988959,rs9584850,rs7983438,rs12261,rs8481,rs4584,rs3742137,rs3742136,rs12463,rs9168,rs2031239,rs3783005,rs9517310,rs16955624,rs59393930,rs11841757,rs59362748,rs61971237,rs11841352,rs60992538,rs11839260,rs61968461,rs61971236,rs61971239,rs60591004,…
rs9387963	FGF21	fibroblast growth factor 21	6_98423208	6_98423208_G_A	rs9372650	1	27787	G	A	0.442994	0.999409	45.8176	1.3e-11	-0.00819859	0.00124605	43.2922	4.7e-11	rs9387963,rs9387955,rs4412207,rs7765605,rs6938973,rs9387952,rs6905544,rs6900820,rs6917247,rs7772622,rs6917037,rs9375023,rs9482139,rs7772327,rs4313006,rs6650999,rs7753937,rs9490147,rs4644071,rs6569189,rs6651004,rs6569192,rs9490143,rs6569187,rs11154010,rs4464802,rs4548017,rs7761851,rs11154009,rs9320798,rs9482120,rs9372650,rs7757790,rs9401305,rs4412208,rs4460216,rs35121390,rs9398648,rs12189679,rs424…
rs7619139	TMEM161B-AS1	TMEM161B antisense RNA 1	3_25110415	3_25110415_T_A	rs6804842	0.916957	3978	T	A	0.41119	0.991144	36.3608	1.6e-09	-0.00815329	0.00125959	41.8997	9.6e-11	rs7619139,rs4858697,rs6767671,rs7429279,rs10510554,rs1609783,rs6804842,rs35779991,rs6808550,rs12629972,rs12632128,rs4858144,rs12638455,rs12630658,rs767823,rs11129188,rs11710620,rs13070019,rs4858696,rs1347559,rs7639228,rs6550938
rs1437971	CHST10	carbohydrate sulfotransferase 10	2_100986964	2_100986964_A_C	rs7606277	0.957723	57438	A	C	0.349361	0.971504	41.5522	1.1e-10	0.00847493	0.00131191	41.7317	1e-10	rs1437971,rs7606277,rs11123825,rs4851287
rs16850592	SCN2A	sodium voltage-gated channel alpha subunit 2	2_166265016	2_166265016_T_C	NA	NA	NA	T	C	0.758963	0.991084	45.3442	1.7e-11	0.00931811	0.00144861	41.3761	1.3e-10	rs16850592,rs16850608,rs12475216,rs16850602,rs62174721,rs2163709,rs62174720,rs12619374,rs16850629,rs1514758,rs4667820,rs10930169,rs79672333,rs6743940,rs1355996,rs79337536,rs4439973,rs4667488,rs1514755,rs16850737,rs1828885,rs16850755,rs4667827,rs6722128,rs16850751,rs1984632,rs62174738,rs6734442,rs1514752,rs1464088,rs1877870,rs1514751,rs16850741,rs6706169,rs2138037,rs4438496,rs12616299,rs16850739,r…
rs10136360	NRXN3	neurexin 3	14_79894046	14_79894046_G_A	rs10150482	1	2164	G	A	0.779217	0.98808	43.4124	4.4e-11	-0.00957388	0.00149765	40.8654	1.6e-10	rs10136360,rs10150482,rs17109221,rs72690737,rs17836088,rs8020365,rs17109256,rs10150332,rs7144011,rs10146997,rs10146690,rs10145154,rs7156625,rs2370982,rs8008910,rs28479795,rs111908763,rs7141420,rs72688996
rs1229984	ADH1B	alcohol dehydrogenase 1B (class I), beta polypeptide	4_100239319	4_100239319_T_C	NA	NA	NA	T	C	0.0265565	1	52.0223	5.5e-13	0.0241902	0.00380397	40.4393	2e-10	rs1229984
rs1996928	LINC01524	long intergenic non-protein coding RNA 1524	20_51261414	20_51261414_G_A	rs6126631	0.899709	6204	G	A	0.744975	0.988898	37.1485	1.1e-09	0.00904149	0.00142159	40.4512	2e-10	rs1996928,rs8124744,rs1608474,rs34788820,rs6126635,rs6126634,rs13041661,rs6123193,rs8126232,rs35922256,rs6126626
rs1562308	XPO1	exportin 1	2_61768421	2_61768421_A_C	rs3771258	1	4281	A	C	0.395945	0.998966	42.1208	8.6e-11	-0.00801334	0.0012631	40.2486	2.2e-10	rs1562308,rs6742276,rs2441380,rs2427884,rs34484204,rs2421207,rs1562309,rs778758,rs778752,rs778763,rs11887205,rs778756,rs778762,rs3771258,rs6545883,rs2084195,rs778768,rs778767,rs2305156,rs2305155,rs10779948,rs12713437,rs6718887,rs11125885,rs10186325,rs6545872,rs766447,rs7557230,rs6707830,rs3771260,rs12713438,rs12713439,rs7421663,rs9989864,rs3771261,rs9989775,rs1992765,rs12612677,rs7563678,rs116784…
rs9537160	MIR2113	microRNA 2113	13_56109838	13_56109838_C_T	rs35268045	0.972284	21711	C	T	0.721695	0.990716	40.8469	1.6e-10	0.00877585	0.00138362	40.2298	2.3e-10	rs9537160,rs2937336,rs3013315,rs2937338,rs3105071,rs3105070,rs9527379,rs3105061,rs3105060,rs9527380,rs3124409,rs3105094,rs3124432,rs3105069,rs3124431,rs3105068,rs3105067,rs2315876,rs9527378,rs3105062,rs3105089,rs3105091,rs3105092,rs3105093,rs3105095,rs7982441,rs3124402,rs1550150,rs12864723,rs692816,rs9537117,rs1436698,rs1436697,rs692930,rs7982241,rs3105056,rs3124421,rs3124420,rs3105085,rs1657202,…
rs40465	RAB9BP1	RAB9B, member RAS oncogene family pseudogene 1	5_103981726	5_103981726_T_G	NA	NA	NA	T	G	0.668425	0.990193	34.538	4.2e-09	-0.00832914	0.00131672	40.0144	2.5e-10	rs40465,rs77960,rs2431108,rs12658007,rs12658451,rs171697,rs30266,rs173823,rs1592757,rs6869862,rs4320234,rs1833514,rs1421669,rs6891820,rs12657531,rs12515429,rs1421667,rs1421666,rs4295362,rs11955377,rs2193933,rs7706353,rs4438849,rs4521446,rs6865511,rs1421668,rs2032790,rs6867409,rs1592756,rs6596578,rs11242522,rs2403284,rs7703746,rs35319957,rs10064425,rs12659431,rs12658032,rs11242523,rs959857,rs76890…
rs1516187	LOC730100	uncharacterized LOC730100	2_51930164	2_51930164_T_C	rs1606974	0.928261	56565	T	C	0.131756	0.989505	47.5957	5.2e-12	-0.0115549	0.00183414	39.6888	3e-10	rs1516187,rs1516179,rs1356213,rs10182761,rs13010288,rs72807818,rs12613825,rs6739137,rs4353689,rs1516180,rs6753905,rs9973354,rs4146702,rs1400105,rs1516183,rs2176220,rs959661
rs34452566	BDNF	brain derived neurotrophic factor	11_27793470	11_27793470_G_T	NA	NA	NA	G	T	0.801102	1	40.5908	1.9e-10	-0.00972968	0.00154781	39.5151	3.3e-10	rs34452566
rs11646118	KCTD13	potassium channel tetramerization domain containing 13	16_29926471	16_29926471_T_C	NA	NA	NA	T	C	0.912927	0.990959	44.6188	2.4e-11	0.013771	0.00219753	39.2701	3.7e-10	rs11646118
rs2393831	CABCOCO1	ciliary associated calcium binding coiled-coil 1	10_63466754	10_63466754_A_G	rs7085297	0.870052	65332	A	G	0.777106	0.997043	36.5699	1.5e-09	0.00928993	0.00148858	38.9473	4.4e-10	rs2393831,rs10994920,rs10821904,rs10994887,rs10994897,rs10994882,rs10994915,rs4144119
rs55807911	LOC100505736	uncharacterized LOC100505736	2_28421473	2_28421473_T_C	NA	NA	NA	T	C	0.801572	0.902826	35.5185	2.5e-09	-0.0101316	0.00162751	38.7534	4.8e-10	rs55807911
rs10457480	MIR588	microRNA 588	6_126812609	6_126812609_C_G	rs12202204	1	126202	C	G	0.697788	0.995334	37.716	8.2e-10	-0.0083187	0.00134796	38.0854	6.8e-10	rs10457480,rs10457481,rs10457478,rs12202204,rs34539692,rs1907067,rs4418209,rs2130603,rs9372840,rs9401885,rs4053271,rs9375446,rs1602278,rs7738135,rs1490387,rs1159619,rs4895808,rs9385401,rs1361108,rs9398809,rs9375439,rs9398808,rs9385399,rs9385400,rs9401883,rs4422634,rs9398805,rs1415671,rs1361107,rs1337735,rs2184967,rs1490388,rs4897179,rs1538172,rs9401882,rs1120786,rs2326451,rs9388494,rs9375441,rs20…
rs141086701			8_143361458	8_143361458_G_A	rs183096575	1	978212	G	A	0.991838	0.868294	47.8035	4.7e-12	0.0449508	0.00734433	37.4603	9.3e-10	rs141086701,rs147422283
rs4442732	SIX6	SIX homeobox 6	14_61025617	14_61025617_A_G	rs7159392	1	17021	A	G	0.377013	0.9976	36.4809	1.5e-09	-0.00779507	0.0012767	37.2786	1e-09	rs4442732,rs1955695,rs7159392,rs2351174,rs1269027,rs1268618,rs1270509,rs1254316,rs1254251,rs1254304,rs12436579,rs1262173,rs1254314,rs1254315,rs1268619,rs1254253,rs1033732,rs1313244,rs1314387,rs1314343,rs1313684,rs1314620,rs1254252,rs1272348,rs1313245,rs932606,rs56259273,rs1313246,rs1254260,rs35155027,rs1254284,rs1254257,rs1254285,rs1254290,rs1254301,rs1254282,rs1254293,rs1254313,rs1254258,rs94171…
rs643428	SSBP3-AS1	SSBP3 antisense RNA 1	1_54728858	1_54728858_C_T	NA	NA	NA	C	T	0.393146	0.988699	34.5473	4.2e-09	0.00768192	0.00127171	36.489	1.5e-09	rs643428,rs630602,rs12737061,rs3766428,rs702496,rs11580067,rs11581298,rs4927078,rs3766431,rs3766433,rs2149613,rs640996,rs3766430,rs1890567,rs3766437,rs43902,rs3820110,rs655274,rs687050
rs2422137	NEGR1	neuronal growth regulator 1	1_72619961	1_72619961_C_A	rs12402629	0.939499	41252	C	A	0.545986	0.990815	33.6904	6.5e-09	0.00750123	0.00124279	36.4306	1.6e-09	rs2422137,rs10789340,rs11209921,rs7556006,rs7515320,rs2630406,rs12141628,rs2821239,rs12132602,rs12750634,rs2630390,rs57316908,rs11209920,rs12133604,rs7517923,rs11209915,rs11209916,rs4649954,rs7541218,rs1486096,rs2630400,rs1564970,rs2630395,rs7531118,rs1194277,rs1385912,rs2821246,rs12402629,rs1486093
rs7442885	STK24	serine/threonine kinase 24	5_87682877	5_87682877_C_G	rs247916	0.963855	152624	C	G	0.786513	0.993203	28.2364	1.1e-07	0.00905755	0.00151146	35.911	2.1e-09	rs7442885,rs6870983,rs7445169,rs2410767,rs13157159,rs10043347,rs33704,rs2410763,rs1430204,rs247916,rs247915,rs33703,rs193707,rs193706,rs2115885,rs2728786,rs2728784
rs17635778	BRINP1	BMP/retinoic acid inducible neural specific 1	9_122165102	9_122165102_C_T	rs956172	1	995	C	T	0.82607	0.987858	35.7037	2.3e-09	0.00974302	0.00163968	35.3078	2.8e-09	rs17635778,rs11788474,rs17635892,rs956172
rs11584700	LRRN2	leucine rich repeat neuronal 2	1_204576983	1_204576983_A_G	rs55678522	1	3502	A	G	0.790836	0.996119	33.7911	6.1e-09	0.00898544	0.00152048	34.9233	3.4e-09	rs11584700,rs55678522,rs11240229,rs3789045,rs3747631,rs11588857
rs1036336	PLCL1	phospholipase C like 1 (inactive)	2_198964120	2_198964120_T_C	rs10931799	0.960384	6981	T	C	0.488795	0.995819	37.3936	9.7e-10	0.00729244	0.00123823	34.6848	3.9e-09	rs1036336
rs5760425	SPECC1L-ADORA2A	SPECC1L-ADORA2A readthrough (NMD candidate)	22_24842452	22_24842452_T_G	rs3761422	0.978819	15780	T	G	0.391409	0.999044	31.117	2.4e-08	0.00745825	0.00126653	34.6772	3.9e-09	rs5760425,rs3761422,rs9612627,rs738816,rs5751876,rs4822493,rs4822494,rs5760446,rs5760448,rs5760452,rs12168879,rs1008931,rs5760435,rs4822500,rs1008932,rs9624479,rs5751882,rs5760454,rs4822491,rs1547358,rs4822504,rs1548302,rs5760450,rs4822490,rs5760423,rs5760441,rs738813,rs9620391,rs1041749,rs2186376,rs2032115,rs5760447,rs9612623,rs1041750,rs5760440,rs4822501,rs4822499,rs2232866,rs4822498,rs2032116
rs17123039	ABHD12B	abhydrolase domain containing 12B	14_51332335	14_51332335_T_G	rs7143869	0.873199	4113	T	G	0.581866	0.994691	33.6308	6.7e-09	0.00725318	0.00125576	33.3611	7.7e-09	rs17123039
rs2968426	MIR5093	microRNA 5093	16_85335735	16_85335735_G_C	rs2930225	0.831017	7833	G	C	0.255075	0.988842	32.4603	1.2e-08	0.00822175	0.00142492	33.2926	7.9e-09	rs2968426,rs2930235
rs2945091			11_28845569	11_28845569_G_A	rs1517563	1	3063	G	A	0.440867	0.995816	33.402	7.5e-09	0.00716434	0.0012451	33.1089	8.7e-09	rs2945091,rs2945094,rs2945093
rs72634682	NOVA1-AS1		8_34325317	8_34325317_G_A	rs11994839	0.957364	133989	G	A	0.861156	0.99434	43.635	4e-11	-0.0102914	0.00179502	32.871	9.8e-09	rs72634682
SNP: rs number;CHR: chromosome; BP: physical (base pair) position; GENPOS: genetic position either from bim file or interpolated from genetic map; ALLELE1: first allele in bim file (usually the minor allele), used as the effect allele; ALLELE0: second allele in bim file, used as the reference allele; A1FREQ: frequency of first allele; BETA: effect size from BOLT-LMM approximation to infinitesimal…
