# Supplementary material for: GWAS for urinary sodium and potassium excretion highlights pathways shared with cardiovascular traits
Source: Nat Commun. 2019 Aug 13;10:3653. doi: 10.1038/s41467-019-11451-y (PMC6692500; doi:10.1038/s41467-019-11451-y)
Supplement: Supplementary file 4 — Supplementary Dataset 4 [file 41467_2019_11451_MOESM4_ESM.xlsx]

## Sheet: Supplementary Data 4
Supplementary Data 4: Urinary potassium lead SNPs and corresponding regional SNPs at P<1×10-8.
Strongest SNP in Locus	Gene nearest to Locus	Complete Gene name	chr_pos	chr_pos_a1_a2	proxy r2>80	R.squared	Distance	ALLELE1	ALLELE0	A1FREQ	INFO	CHISQ_LINREG	P_LINREG	BETA	SE	CHISQ_BOLT_LMM_INF	P_BOLT_LMM_INF	namesnp	Inlocus
rs13143189	ADRA2C	adrenoceptor alpha 2C	4_3757380	4_3757380_G_A	NA	NA	NA	G	A	0.563914	0.983018	78.4239	8.3e-19	0.0109685	0.00121798	81.0985	2.1e-19	4_3757380_G_A	rs13143189,rs13131264,rs4916601,rs12645890,rs4498196,rs10005414,rs9291156,rs17813250,rs12641452,rs440318,rs11943482,rs10013535,rs419315,rs2857955,rs13127170,rs441105,rs374727,rs430608,rs447354,rs369200,rs445275,rs2857958,rs2748751,rs428771,rs423287,rs9790534,rs2857959,rs13340326
rs2472297	CYP1A1	cytochrome P450 family 1 subfamily A member 1	15_75027880	15_75027880_C_T	NA	NA	NA	C	T	0.737346	1	61.0219	5.6e-15	0.0106514	0.00135803	61.5161	4.4e-15	15_75027880_C_T	rs2472297,rs2470893,rs35107470,rs11634836,rs1873379,rs76307456
rs4410790	AHR	aryl hydrocarbon receptor	7_17284577	7_17284577_T_C	rs6946935	0.866087	3541	T	C	0.368691	1	53.9329	2.1e-13	0.00874545	0.00124235	49.5534	1.9e-12	7_17284577_T_C	rs4410790,rs6968865,rs6968554,rs10281571,rs2106727,rs10275488,rs10277582,rs10252701,rs2389763
rs72704791	MIR4456	microRNA 4456	5_547896	5_547896_A_G	5	0.868797	15291	A	G	0.808299	0.99884	47.7108	4.9e-12	0.0106017	0.00152158	48.547	3.2e-12	5_547896_A_G	rs72704791,rs72704799,rs17563576,rs12521988,rs72706608,rs12521051,rs12519763,rs17497684,rs12522303,rs72706611,rs72706612,rs72706610,rs72706606,rs72704802,rs11740553,rs4957056,rs61384641,rs4527146,rs72703026,rs4081846,rs4081847,rs4957053,rs111352378,rs72703034,rs72703051,rs72707023,rs28563961,rs7443550,rs72703042,rs58015612,rs56216231,rs4245972,rs12515813,rs11742854,rs77015126,rs72707027,rs5635008…
rs4973766	SLC4A7	solute carrier family 4 member 7	3_27413566	3_27413566_C_T	rs6774748	0.921429	7861	C	T	0.542639	0.997149	43.2701	4.8e-11	0.00836621	0.0012037	48.308	3.6e-12	3_27413566_C_T	rs4973766,rs6774748,rs1051545,rs10049490,rs55782834,rs491976,rs4973768,rs1352944,rs1352943,rs3920005,rs9820391,rs3213930,rs11129270,rs9848482,rs13085724,rs9842044,rs2034190,rs7634574,rs7615829,rs6551182,rs2370946,rs12715119,rs2370941,rs6551184,rs1899998,rs1899997,rs9838558,rs11711853,rs9858306,rs9832789,rs7622813,rs1579817,rs2100006,rs479566,rs6551176,rs7620772,rs11914763,rs472146,rs481519,rs3103…
rs254023	RAB9BP1	RAB9B, member RAS oncogene family pseudogene 1	5_103955361	5_103955361_T_C	rs2447827	1	7316	T	C	0.560891	0.999278	39.897	2.7e-10	-0.007873	0.00120633	42.594	6.7e-11	5_103955361_T_C	rs254023,rs254020,rs254035,rs185260,rs33817,rs1363100,rs254045,rs2447832,rs2431109,rs2447828,rs445578,rs254024,rs2161097,rs2447838,rs254025,rs2112163,rs2447827,rs2431112,rs6869862,rs4438849,rs6874138,rs12659431,rs35319957,rs1582419,rs11955377,rs10059133,rs2193933,rs1592755,rs6867409,rs1592756,rs4703040,rs4482879,rs6870957,rs4515268,rs416223,rs13187104,rs11958220,rs13165289,rs7731266,rs1363098,rs1…
rs10854166	FKBP8	FK506 binding protein 8	19_18652844	19_18652844_A_G	NA	NA	NA	A	G	0.518645	0.972036	37.9133	7.4e-10	0.00752479	0.00121538	38.3319	6e-10	19_18652844_A_G	rs10854166
rs61375854	FAM83B	family with sequence similarity 83 member B	6_54546301	6_54546301_T_G	rs7753964	1	36581	T	G	0.666305	0.994812	33.1582	8.5e-09	-0.00752992	0.00127228	35.0278	3.3e-09	6_54546301_T_G	rs61375854,rs4712066,rs73440097,rs16885760,rs4712065,rs1395627,rs7740110,rs6903481,rs6903770,rs12528779,rs10484989,rs12526949,rs931889,rs1983140,rs1948954,rs2048113,rs16885654,rs1848188,rs12660952,rs73442093,rs7753964,rs78104758,rs872135,rs12664014,rs12528652,rs60999808,rs16885682,rs4715466,rs541689,rs10807476,rs511441,rs12527767,rs534685,rs590594,rs34659714,rs953896,rs11966577,rs1280710,rs129846…
rs2122127	PPP3R1	protein phosphatase 3 regulatory subunit B, alpha	2_68445354	2_68445354_A_G	rs28694054	1	39809	A	G	0.607895	0.99719	32.7297	1.1e-08	0.00716293	0.0012294	33.9465	5.7e-09	2_68445354_A_G	rs2122127,rs12053466,rs28694054,rs687,rs62145958,rs60620861,rs59883268,rs6749303,rs2278790,rs13395335,rs13402188,rs6733029,rs7593613,rs4519508,rs1822469,rs2861818,rs6546367
rs12944041	TMEM107	transmembrane protein 107	17_8073097	17_8073097_G_A	rs2585398	0.979775	18237	G	A	0.449877	0.992807	37.0928	1.1e-09	0.00700048	0.00120774	33.5975	6.8e-09	17_8073097_G_A	rs12944041
rs6467447	CHCHD3	coiled-coil-helix-coiled-coil-helix domain containing 3	7_132525147	7_132525147_C_T	rs10267503	0.90161	33014	C	T	0.37173	0.994044	34.5048	4.3e-09	0.00720042	0.00124211	33.6045	6.8e-09	7_132525147_C_T	rs6467447
rs7319172			13_67380168	13_67380168_G_A	rs2165599	0.979021	3552	G	A	0.432439	0.997209	33.4828	7.2e-09	-0.00699888	0.00121032	33.439	7.4e-09	13_67380168_G_A	rs7319172
rs784257	LINC01415	long intergenic non-protein coding RNA 1415	18_53397199	18_53397199_T_C	rs613872	0.87531	186897	T	C	0.187607	0.987731	30.5438	3.3e-08	-0.00890228	0.00154365	33.2586	8.1e-09	18_53397199_T_C	rs784257
SNP: rs number;CHR: chromosome; BP: physical (base pair) position; GENPOS: genetic position either from bim file or interpolated from genetic map; ALLELE1: first allele in bim file (usually the minor allele), used as the effect allele; ALLELE0: second allele in bim file, used as the reference allele; A1FREQ: frequency of first allele; BETA: effect size from BOLT-LMM approximation to infinitesimal…
