# Supplementary material for: GWAS for urinary sodium and potassium excretion highlights pathways shared with cardiovascular traits
Source: Nat Commun. 2019 Aug 13;10:3653. doi: 10.1038/s41467-019-11451-y (PMC6692500; doi:10.1038/s41467-019-11451-y)
Supplement: Supplementary file 5 — Supplementary Dataset 5 [file 41467_2019_11451_MOESM5_ESM.xlsx]

## Sheet: Supplementary Data 5
Supplementary Data 5: Urinary sodium SNPs associations and functional annotations at P<1×10-8.
SNP	Location	Allele	Gene	Feature	Feature_type	Consequence	cDNA_position	CDS_position	Protein_position	Amino_acids	Codons	Existing_variation	Extra
rs613872	18:53210302	T	ENSG00000196628	ENST00000354452	Transcript	intron_variant	-	-	-	-	-	-	IMPACT=MODIFIER;STRAND=-1;SYMBOL=TCF4;SYMBOL_SOURCE=HGNC;HGNC_ID=11634;NEAREST=TCF4;INTRON=3/19
rs613872	18:53210302	T	ENSG00000196628	ENST00000356073	Transcript	intron_variant	-	-	-	-	-	-	IMPACT=MODIFIER;STRAND=-1;SYMBOL=TCF4;SYMBOL_SOURCE=HGNC;HGNC_ID=11634;NEAREST=TCF4;INTRON=3/19
rs613872	18:53210302	T	ENSG00000196628	ENST00000398339	Transcript	intron_variant	-	-	-	-	-	-	IMPACT=MODIFIER;STRAND=-1;SYMBOL=TCF4;SYMBOL_SOURCE=HGNC;HGNC_ID=11634;NEAREST=TCF4;INTRON=4/20
rs613872	18:53210302	T	ENSG00000196628	ENST00000537578	Transcript	intron_variant	-	-	-	-	-	-	IMPACT=MODIFIER;STRAND=-1;SYMBOL=TCF4;SYMBOL_SOURCE=HGNC;HGNC_ID=11634;NEAREST=TCF4;INTRON=2/18
rs613872	18:53210302	T	ENSG00000196628	ENST00000540999	Transcript	intron_variant	-	-	-	-	-	-	IMPACT=MODIFIER;STRAND=-1;SYMBOL=TCF4;SYMBOL_SOURCE=HGNC;HGNC_ID=11634;NEAREST=TCF4;INTRON=2/18
rs613872	18:53210302	T	ENSG00000196628	ENST00000562543	Transcript	intron_variant	-	-	-	-	-	-	IMPACT=MODIFIER;STRAND=-1;FLAGS=cds_end_NF;SYMBOL=TCF4;SYMBOL_SOURCE=HGNC;HGNC_ID=11634;NEAREST=TCF4;INTRON=3/6
rs613872	18:53210302	T	ENSG00000196628	ENST00000562847	Transcript	intron_variant	-	-	-	-	-	-	IMPACT=MODIFIER;STRAND=-1;FLAGS=cds_end_NF;SYMBOL=TCF4;SYMBOL_SOURCE=HGNC;HGNC_ID=11634;NEAREST=TCF4;INTRON=2/6
rs613872	18:53210302	T	ENSG00000196628	ENST00000563824	Transcript	intron_variant	-	-	-	-	-	-	IMPACT=MODIFIER;STRAND=-1;FLAGS=cds_end_NF;SYMBOL=TCF4;SYMBOL_SOURCE=HGNC;HGNC_ID=11634;NEAREST=TCF4;INTRON=1/5
rs613872	18:53210302	T	ENSG00000196628	ENST00000563888	Transcript	intron_variant	-	-	-	-	-	-	IMPACT=MODIFIER;STRAND=-1;FLAGS=cds_end_NF;SYMBOL=TCF4;SYMBOL_SOURCE=HGNC;HGNC_ID=11634;NEAREST=TCF4;INTRON=2/6
rs613872	18:53210302	T	ENSG00000196628	ENST00000564343	Transcript	intron_variant	-	-	-	-	-	-	IMPACT=MODIFIER;STRAND=-1;FLAGS=cds_end_NF;SYMBOL=TCF4;SYMBOL_SOURCE=HGNC;HGNC_ID=11634;NEAREST=TCF4;INTRON=2/5
rs613872	18:53210302	T	ENSG00000196628	ENST00000564403	Transcript	intron_variant	-	-	-	-	-	-	IMPACT=MODIFIER;STRAND=-1;SYMBOL=TCF4;SYMBOL_SOURCE=HGNC;HGNC_ID=11634;NEAREST=TCF4;INTRON=3/19
rs613872	18:53210302	T	ENSG00000196628	ENST00000564999	Transcript	intron_variant	-	-	-	-	-	-	IMPACT=MODIFIER;STRAND=-1;SYMBOL=TCF4;SYMBOL_SOURCE=HGNC;HGNC_ID=11634;NEAREST=TCF4;INTRON=3/19
rs613872	18:53210302	T	ENSG00000196628	ENST00000565018	Transcript	intron_variant	-	-	-	-	-	-	IMPACT=MODIFIER;STRAND=-1;SYMBOL=TCF4;SYMBOL_SOURCE=HGNC;HGNC_ID=11634;NEAREST=TCF4;INTRON=3/19
rs613872	18:53210302	T	ENSG00000196628	ENST00000565580	Transcript	intron_variant,non_coding_transcript_variant	-	-	-	-	-	-	IMPACT=MODIFIER;STRAND=-1;SYMBOL=TCF4;SYMBOL_SOURCE=HGNC;HGNC_ID=11634;NEAREST=TCF4;INTRON=1/3
rs613872	18:53210302	T	ENSG00000196628	ENST00000565908	Transcript	intron_variant	-	-	-	-	-	-	IMPACT=MODIFIER;STRAND=-1;FLAGS=cds_end_NF;SYMBOL=TCF4;SYMBOL_SOURCE=HGNC;HGNC_ID=11634;NEAREST=TCF4;INTRON=2/8
rs613872	18:53210302	T	ENSG00000196628	ENST00000566279	Transcript	intron_variant	-	-	-	-	-	-	IMPACT=MODIFIER;STRAND=-1;SYMBOL=TCF4;SYMBOL_SOURCE=HGNC;HGNC_ID=11634;NEAREST=TCF4;INTRON=3/17
rs613872	18:53210302	T	ENSG00000196628	ENST00000566286	Transcript	intron_variant	-	-	-	-	-	-	IMPACT=MODIFIER;STRAND=-1;SYMBOL=TCF4;SYMBOL_SOURCE=HGNC;HGNC_ID=11634;NEAREST=TCF4;INTRON=2/18
rs613872	18:53210302	T	ENSG00000196628	ENST00000566514	Transcript	intron_variant	-	-	-	-	-	-	IMPACT=MODIFIER;STRAND=-1;FLAGS=cds_end_NF;SYMBOL=TCF4;SYMBOL_SOURCE=HGNC;HGNC_ID=11634;NEAREST=TCF4;INTRON=2/9
rs613872	18:53210302	T	ENSG00000196628	ENST00000567880	Transcript	intron_variant	-	-	-	-	-	-	IMPACT=MODIFIER;STRAND=-1;SYMBOL=TCF4;SYMBOL_SOURCE=HGNC;HGNC_ID=11634;NEAREST=TCF4;INTRON=2/16
rs613872	18:53210302	T	ENSG00000196628	ENST00000568147	Transcript	intron_variant	-	-	-	-	-	-	IMPACT=MODIFIER;STRAND=-1;FLAGS=cds_end_NF;SYMBOL=TCF4;SYMBOL_SOURCE=HGNC;HGNC_ID=11634;NEAREST=TCF4;INTRON=2/6
rs613872	18:53210302	T	ENSG00000196628	ENST00000568169	Transcript	intron_variant	-	-	-	-	-	-	IMPACT=MODIFIER;STRAND=-1;FLAGS=cds_end_NF;SYMBOL=TCF4;SYMBOL_SOURCE=HGNC;HGNC_ID=11634;NEAREST=TCF4;INTRON=2/9
rs613872	18:53210302	T	ENSG00000196628	ENST00000568673	Transcript	intron_variant	-	-	-	-	-	-	IMPACT=MODIFIER;STRAND=-1;SYMBOL=TCF4;SYMBOL_SOURCE=HGNC;HGNC_ID=11634;NEAREST=TCF4;INTRON=2/18
rs613872	18:53210302	T	ENSG00000196628	ENST00000568740	Transcript	intron_variant	-	-	-	-	-	-	IMPACT=MODIFIER;STRAND=-1;SYMBOL=TCF4;SYMBOL_SOURCE=HGNC;HGNC_ID=11634;NEAREST=TCF4;INTRON=2/18
rs613872	18:53210302	T	ENSG00000196628	ENST00000569357	Transcript	intron_variant	-	-	-	-	-	-	IMPACT=MODIFIER;STRAND=-1;FLAGS=cds_end_NF;SYMBOL=TCF4;SYMBOL_SOURCE=HGNC;HGNC_ID=11634;NEAREST=TCF4;INTRON=3/5
rs784257	18:53397199	C	ENSG00000267284	ENST00000587346	Transcript	intron_variant,non_coding_transcript_variant	-	-	-	-	-	-	IMPACT=MODIFIER;STRAND=1;SYMBOL=RP11-397A16.1;SYMBOL_SOURCE=Clone_based_vega_gene;NEAREST=TCF4;INTRON=1/4
rs784257	18:53397199	C	ENSG00000267284	ENST00000589662	Transcript	intron_variant,non_coding_transcript_variant	-	-	-	-	-	-	IMPACT=MODIFIER;STRAND=1;SYMBOL=RP11-397A16.1;SYMBOL_SOURCE=Clone_based_vega_gene;NEAREST=TCF4;INTRON=1/3
rs784257	18:53397199	C	ENSG00000267284	ENST00000592936	Transcript	intron_variant,non_coding_transcript_variant	-	-	-	-	-	-	IMPACT=MODIFIER;STRAND=1;SYMBOL=RP11-397A16.1;SYMBOL_SOURCE=Clone_based_vega_gene;NEAREST=TCF4;INTRON=1/1
rs784256	18:53398626	A	ENSG00000267284	ENST00000587346	Transcript	intron_variant,non_coding_transcript_variant	-	-	-	-	-	-	IMPACT=MODIFIER;STRAND=1;SYMBOL=RP11-397A16.1;SYMBOL_SOURCE=Clone_based_vega_gene;NEAREST=TCF4;INTRON=1/4
rs784256	18:53398626	A	ENSG00000267284	ENST00000589662	Transcript	intron_variant,non_coding_transcript_variant	-	-	-	-	-	-	IMPACT=MODIFIER;STRAND=1;SYMBOL=RP11-397A16.1;SYMBOL_SOURCE=Clone_based_vega_gene;NEAREST=TCF4;INTRON=1/3
rs784256	18:53398626	A	ENSG00000267284	ENST00000592936	Transcript	intron_variant,non_coding_transcript_variant	-	-	-	-	-	-	IMPACT=MODIFIER;STRAND=1;SYMBOL=RP11-397A16.1;SYMBOL_SOURCE=Clone_based_vega_gene;NEAREST=TCF4;INTRON=1/1
rs4803378	19:41333441	A	ENSG00000237118	ENST00000437853	Transcript	upstream_gene_variant	-	-	-	-	-	-	IMPACT=MODIFIER;DISTANCE=764;STRAND=-1;SYMBOL=CYP2F2P;SYMBOL_SOURCE=HGNC;HGNC_ID=18851;NEAREST=EGLN2
rs4803378	19:41333441	A	ENSG00000269843	ENST00000596135	Transcript	downstream_gene_variant	-	-	-	-	-	-	IMPACT=MODIFIER;DISTANCE=3685;STRAND=-1;SYMBOL=CTC-490E21.10;SYMBOL_SOURCE=Clone_based_vega_gene;NEAREST=EGLN2
rs4803378	19:41333441	A	ENSG00000268797	ENST00000601627	Transcript	intron_variant,NMD_transcript_variant	-	-	-	-	-	-	IMPACT=MODIFIER;STRAND=1;FLAGS=cds_start_NF;SYMBOL=CTC-490E21.12;SYMBOL_SOURCE=Clone_based_vega_gene;NEAREST=EGLN2;INTRON=1/3
rs144002017	19:41335269	G	ENSG00000237118	ENST00000437853	Transcript	upstream_gene_variant	-	-	-	-	-	-	IMPACT=MODIFIER;DISTANCE=2592;STRAND=-1;SYMBOL=CYP2F2P;SYMBOL_SOURCE=HGNC;HGNC_ID=18851;NEAREST=CYP2A6
rs144002017	19:41335269	G	ENSG00000269843	ENST00000596135	Transcript	downstream_gene_variant	-	-	-	-	-	-	IMPACT=MODIFIER;DISTANCE=1857;STRAND=-1;SYMBOL=CTC-490E21.10;SYMBOL_SOURCE=Clone_based_vega_gene;NEAREST=CYP2A6
rs144002017	19:41335269	G	ENSG00000268797	ENST00000601627	Transcript	intron_variant,NMD_transcript_variant	-	-	-	-	-	-	IMPACT=MODIFIER;STRAND=1;FLAGS=cds_start_NF;SYMBOL=CTC-490E21.12;SYMBOL_SOURCE=Clone_based_vega_gene;NEAREST=CYP2A6;INTRON=1/3
rs143303864	19:41336272	A	ENSG00000237118	ENST00000437853	Transcript	upstream_gene_variant	-	-	-	-	-	-	IMPACT=MODIFIER;DISTANCE=3595;STRAND=-1;SYMBOL=CYP2F2P;SYMBOL_SOURCE=HGNC;HGNC_ID=18851;NEAREST=CYP2A6
rs143303864	19:41336272	A	ENSG00000269843	ENST00000596135	Transcript	downstream_gene_variant	-	-	-	-	-	-	IMPACT=MODIFIER;DISTANCE=854;STRAND=-1;SYMBOL=CTC-490E21.10;SYMBOL_SOURCE=Clone_based_vega_gene;NEAREST=CYP2A6
rs143303864	19:41336272	A	ENSG00000268797	ENST00000601627	Transcript	intron_variant,NMD_transcript_variant	-	-	-	-	-	-	IMPACT=MODIFIER;STRAND=1;FLAGS=cds_start_NF;SYMBOL=CTC-490E21.12;SYMBOL_SOURCE=Clone_based_vega_gene;NEAREST=CYP2A6;INTRON=1/3
rs143200968	19:41338847	C	ENSG00000269843	ENST00000596135	Transcript	intron_variant,non_coding_transcript_variant	-	-	-	-	-	-	IMPACT=MODIFIER;STRAND=-1;SYMBOL=CTC-490E21.10;SYMBOL_SOURCE=Clone_based_vega_gene;NEAREST=CYP2A6;INTRON=1/1
rs143200968	19:41338847	C	ENSG00000268797	ENST00000601627	Transcript	intron_variant,NMD_transcript_variant	-	-	-	-	-	-	IMPACT=MODIFIER;STRAND=1;FLAGS=cds_start_NF;SYMBOL=CTC-490E21.12;SYMBOL_SOURCE=Clone_based_vega_gene;NEAREST=CYP2A6;INTRON=1/3
rs117287096	19:41341413	A	ENSG00000269843	ENST00000596135	Transcript	intron_variant,non_coding_transcript_variant	-	-	-	-	-	-	IMPACT=MODIFIER;STRAND=-1;SYMBOL=CTC-490E21.10;SYMBOL_SOURCE=Clone_based_vega_gene;NEAREST=CYP2A6;INTRON=1/1
rs117287096	19:41341413	A	ENSG00000268797	ENST00000601627	Transcript	intron_variant,NMD_transcript_variant	-	-	-	-	-	-	IMPACT=MODIFIER;STRAND=1;FLAGS=cds_start_NF;SYMBOL=CTC-490E21.12;SYMBOL_SOURCE=Clone_based_vega_gene;NEAREST=CYP2A6;INTRON=1/3
rs186051747	19:41342042	A	ENSG00000269843	ENST00000596135	Transcript	intron_variant,non_coding_transcript_variant	-	-	-	-	-	-	IMPACT=MODIFIER;STRAND=-1;SYMBOL=CTC-490E21.10;SYMBOL_SOURCE=Clone_based_vega_gene;NEAREST=CYP2A6;INTRON=1/1
rs186051747	19:41342042	A	ENSG00000268797	ENST00000601627	Transcript	intron_variant,NMD_transcript_variant	-	-	-	-	-	-	IMPACT=MODIFIER;STRAND=1;FLAGS=cds_start_NF;SYMBOL=CTC-490E21.12;SYMBOL_SOURCE=Clone_based_vega_gene;NEAREST=CYP2A6;INTRON=1/3
rs145580088	19:41342842	G	ENSG00000269843	ENST00000596135	Transcript	intron_variant,non_coding_transcript_variant	-	-	-	-	-	-	IMPACT=MODIFIER;STRAND=-1;SYMBOL=CTC-490E21.10;SYMBOL_SOURCE=Clone_based_vega_gene;NEAREST=CYP2A6;INTRON=1/1
rs145580088	19:41342842	G	ENSG00000268797	ENST00000601627	Transcript	intron_variant,NMD_transcript_variant	-	-	-	-	-	-	IMPACT=MODIFIER;STRAND=1;FLAGS=cds_start_NF;SYMBOL=CTC-490E21.12;SYMBOL_SOURCE=Clone_based_vega_gene;NEAREST=CYP2A6;INTRON=1/3
rs117422348	19:41344466	T	ENSG00000255974	ENST00000301141	Transcript	downstream_gene_variant	-	-	-	-	-	-	IMPACT=MODIFIER;DISTANCE=4977;STRAND=-1;SYMBOL=CYP2A6;SYMBOL_SOURCE=HGNC;HGNC_ID=2610;NEAREST=CYP2A6
rs117422348	19:41344466	T	ENSG00000269843	ENST00000596135	Transcript	upstream_gene_variant	-	-	-	-	-	-	IMPACT=MODIFIER;DISTANCE=1351;STRAND=-1;SYMBOL=CTC-490E21.10;SYMBOL_SOURCE=Clone_based_vega_gene;NEAREST=CYP2A6
rs117422348	19:41344466	T	ENSG00000255974	ENST00000599960	Transcript	downstream_gene_variant	-	-	-	-	-	-	IMPACT=MODIFIER;DISTANCE=4980;STRAND=-1;SYMBOL=CYP2A6;SYMBOL_SOURCE=HGNC;HGNC_ID=2610;NEAREST=CYP2A6
rs117422348	19:41344466	T	ENSG00000268797	ENST00000601627	Transcript	intron_variant,NMD_transcript_variant	-	-	-	-	-	-	IMPACT=MODIFIER;STRAND=1;FLAGS=cds_start_NF;SYMBOL=CTC-490E21.12;SYMBOL_SOURCE=Clone_based_vega_gene;NEAREST=CYP2A6;INTRON=1/3
rs112292570	19:41345586	T	ENSG00000255974	ENST00000301141	Transcript	downstream_gene_variant	-	-	-	-	-	-	IMPACT=MODIFIER;DISTANCE=3857;STRAND=-1;SYMBOL=CYP2A6;SYMBOL_SOURCE=HGNC;HGNC_ID=2610;NEAREST=CYP2A6
rs112292570	19:41345586	T	ENSG00000269843	ENST00000596135	Transcript	upstream_gene_variant	-	-	-	-	-	-	IMPACT=MODIFIER;DISTANCE=2471;STRAND=-1;SYMBOL=CTC-490E21.10;SYMBOL_SOURCE=Clone_based_vega_gene;NEAREST=CYP2A6
rs112292570	19:41345586	T	ENSG00000255974	ENST00000599960	Transcript	downstream_gene_variant	-	-	-	-	-	-	IMPACT=MODIFIER;DISTANCE=3860;STRAND=-1;SYMBOL=CYP2A6;SYMBOL_SOURCE=HGNC;HGNC_ID=2610;NEAREST=CYP2A6
rs112292570	19:41345586	T	ENSG00000268797	ENST00000601627	Transcript	intron_variant,NMD_transcript_variant	-	-	-	-	-	-	IMPACT=MODIFIER;STRAND=1;FLAGS=cds_start_NF;SYMBOL=CTC-490E21.12;SYMBOL_SOURCE=Clone_based_vega_gene;NEAREST=CYP2A6;INTRON=1/3
rs28399462	19:41350615	A	ENSG00000255974	ENST00000301141	Transcript	synonymous_variant	1245	1224	408	P	ccC/ccT	-	IMPACT=LOW;STRAND=-1;SYMBOL=CYP2A6;SYMBOL_SOURCE=HGNC;HGNC_ID=2610;NEAREST=CYP2A6;EXON=8/9
rs28399462	19:41350615	A	ENSG00000255974	ENST00000596719	Transcript	downstream_gene_variant	-	-	-	-	-	-	IMPACT=MODIFIER;DISTANCE=212;STRAND=-1;SYMBOL=CYP2A6;SYMBOL_SOURCE=HGNC;HGNC_ID=2610;NEAREST=CYP2A6
rs28399462	19:41350615	A	ENSG00000255974	ENST00000599960	Transcript	non_coding_transcript_exon_variant	143	-	-	-	-	-	IMPACT=MODIFIER;STRAND=-1;SYMBOL=CYP2A6;SYMBOL_SOURCE=HGNC;HGNC_ID=2610;NEAREST=CYP2A6;EXON=1/2
rs28399462	19:41350615	A	ENSG00000255974	ENST00000600495	Transcript	downstream_gene_variant	-	-	-	-	-	-	IMPACT=MODIFIER;DISTANCE=1319;STRAND=-1;SYMBOL=CYP2A6;SYMBOL_SOURCE=HGNC;HGNC_ID=2610;NEAREST=CYP2A6
rs28399462	19:41350615	A	ENSG00000268797	ENST00000601627	Transcript	intron_variant,NMD_transcript_variant	-	-	-	-	-	-	IMPACT=MODIFIER;STRAND=1;FLAGS=cds_start_NF;SYMBOL=CTC-490E21.12;SYMBOL_SOURCE=Clone_based_vega_gene;NEAREST=CYP2A6;INTRON=1/3
rs28399459	19:41350787	G	ENSG00000255974	ENST00000301141	Transcript	intron_variant	-	-	-	-	-	-	IMPACT=MODIFIER;STRAND=-1;SYMBOL=CYP2A6;SYMBOL_SOURCE=HGNC;HGNC_ID=2610;NEAREST=CYP2A6;INTRON=7/8
rs28399459	19:41350787	G	ENSG00000255974	ENST00000596719	Transcript	downstream_gene_variant	-	-	-	-	-	-	IMPACT=MODIFIER;DISTANCE=40;STRAND=-1;SYMBOL=CYP2A6;SYMBOL_SOURCE=HGNC;HGNC_ID=2610;NEAREST=CYP2A6
rs28399459	19:41350787	G	ENSG00000255974	ENST00000599960	Transcript	upstream_gene_variant	-	-	-	-	-	-	IMPACT=MODIFIER;DISTANCE=30;STRAND=-1;SYMBOL=CYP2A6;SYMBOL_SOURCE=HGNC;HGNC_ID=2610;NEAREST=CYP2A6
rs28399459	19:41350787	G	ENSG00000255974	ENST00000600495	Transcript	downstream_gene_variant	-	-	-	-	-	-	IMPACT=MODIFIER;DISTANCE=1147;STRAND=-1;SYMBOL=CYP2A6;SYMBOL_SOURCE=HGNC;HGNC_ID=2610;NEAREST=CYP2A6
rs28399459	19:41350787	G	ENSG00000268797	ENST00000601627	Transcript	intron_variant,NMD_transcript_variant	-	-	-	-	-	-	IMPACT=MODIFIER;STRAND=1;FLAGS=cds_start_NF;SYMBOL=CTC-490E21.12;SYMBOL_SOURCE=Clone_based_vega_gene;NEAREST=CYP2A6;INTRON=1/3
rs4803380	19:41351169	T	ENSG00000255974	ENST00000301141	Transcript	intron_variant	-	-	-	-	-	-	IMPACT=MODIFIER;STRAND=-1;SYMBOL=CYP2A6;SYMBOL_SOURCE=HGNC;HGNC_ID=2610;NEAREST=CYP2A6;INTRON=7/8
rs4803380	19:41351169	T	ENSG00000255974	ENST00000596719	Transcript	non_coding_transcript_exon_variant	1042	-	-	-	-	-	IMPACT=MODIFIER;STRAND=-1;SYMBOL=CYP2A6;SYMBOL_SOURCE=HGNC;HGNC_ID=2610;NEAREST=CYP2A6;EXON=6/6
rs4803380	19:41351169	T	ENSG00000255974	ENST00000599960	Transcript	upstream_gene_variant	-	-	-	-	-	-	IMPACT=MODIFIER;DISTANCE=412;STRAND=-1;SYMBOL=CYP2A6;SYMBOL_SOURCE=HGNC;HGNC_ID=2610;NEAREST=CYP2A6
rs4803380	19:41351169	T	ENSG00000255974	ENST00000600495	Transcript	downstream_gene_variant	-	-	-	-	-	-	IMPACT=MODIFIER;DISTANCE=765;STRAND=-1;SYMBOL=CYP2A6;SYMBOL_SOURCE=HGNC;HGNC_ID=2610;NEAREST=CYP2A6
rs4803380	19:41351169	T	ENSG00000268797	ENST00000601627	Transcript	intron_variant,NMD_transcript_variant	-	-	-	-	-	-	IMPACT=MODIFIER;STRAND=1;FLAGS=cds_start_NF;SYMBOL=CTC-490E21.12;SYMBOL_SOURCE=Clone_based_vega_gene;NEAREST=CYP2A6;INTRON=1/3
rs72549444	19:41351843	A	ENSG00000255974	ENST00000301141	Transcript	intron_variant	-	-	-	-	-	-	IMPACT=MODIFIER;STRAND=-1;SYMBOL=CYP2A6;SYMBOL_SOURCE=HGNC;HGNC_ID=2610;NEAREST=CYP2A6;INTRON=6/8
rs72549444	19:41351843	A	ENSG00000255974	ENST00000596719	Transcript	intron_variant,non_coding_transcript_variant	-	-	-	-	-	-	IMPACT=MODIFIER;STRAND=-1;SYMBOL=CYP2A6;SYMBOL_SOURCE=HGNC;HGNC_ID=2610;NEAREST=CYP2A6;INTRON=5/5
rs72549444	19:41351843	A	ENSG00000255974	ENST00000599960	Transcript	upstream_gene_variant	-	-	-	-	-	-	IMPACT=MODIFIER;DISTANCE=1086;STRAND=-1;SYMBOL=CYP2A6;SYMBOL_SOURCE=HGNC;HGNC_ID=2610;NEAREST=CYP2A6
rs72549444	19:41351843	A	ENSG00000255974	ENST00000600495	Transcript	downstream_gene_variant	-	-	-	-	-	-	IMPACT=MODIFIER;DISTANCE=91;STRAND=-1;SYMBOL=CYP2A6;SYMBOL_SOURCE=HGNC;HGNC_ID=2610;NEAREST=CYP2A6
rs72549444	19:41351843	A	ENSG00000268797	ENST00000601627	Transcript	intron_variant,NMD_transcript_variant	-	-	-	-	-	-	IMPACT=MODIFIER;STRAND=1;FLAGS=cds_start_NF;SYMBOL=CTC-490E21.12;SYMBOL_SOURCE=Clone_based_vega_gene;NEAREST=CYP2A6;INTRON=1/3
rs28399448	19:41352936	T	ENSG00000255974	ENST00000301141	Transcript	synonymous_variant	696	675	225	S	tcG/tcA	-	IMPACT=LOW;STRAND=-1;SYMBOL=CYP2A6;SYMBOL_SOURCE=HGNC;HGNC_ID=2610;NEAREST=CYP2A6;EXON=5/9
rs28399448	19:41352936	T	ENSG00000255974	ENST00000596719	Transcript	non_coding_transcript_exon_variant	526	-	-	-	-	-	IMPACT=MODIFIER;STRAND=-1;SYMBOL=CYP2A6;SYMBOL_SOURCE=HGNC;HGNC_ID=2610;NEAREST=CYP2A6;EXON=4/6
rs28399448	19:41352936	T	ENSG00000255974	ENST00000599960	Transcript	upstream_gene_variant	-	-	-	-	-	-	IMPACT=MODIFIER;DISTANCE=2179;STRAND=-1;SYMBOL=CYP2A6;SYMBOL_SOURCE=HGNC;HGNC_ID=2610;NEAREST=CYP2A6
rs28399448	19:41352936	T	ENSG00000255974	ENST00000600495	Transcript	3_prime_UTR_variant,NMD_transcript_variant	706	-	-	-	-	-	IMPACT=MODIFIER;STRAND=-1;SYMBOL=CYP2A6;SYMBOL_SOURCE=HGNC;HGNC_ID=2610;NEAREST=CYP2A6;EXON=5/6
rs28399448	19:41352936	T	ENSG00000268797	ENST00000601627	Transcript	intron_variant,NMD_transcript_variant	-	-	-	-	-	-	IMPACT=MODIFIER;STRAND=1;FLAGS=cds_start_NF;SYMBOL=CTC-490E21.12;SYMBOL_SOURCE=Clone_based_vega_gene;NEAREST=CYP2A6;INTRON=1/3
rs55921593	19:41353897	T	ENSG00000255974	ENST00000301141	Transcript	intron_variant	-	-	-	-	-	-	IMPACT=MODIFIER;STRAND=-1;SYMBOL=CYP2A6;SYMBOL_SOURCE=HGNC;HGNC_ID=2610;NEAREST=CYP2A6;INTRON=4/8
rs55921593	19:41353897	T	ENSG00000255974	ENST00000596719	Transcript	intron_variant,non_coding_transcript_variant	-	-	-	-	-	-	IMPACT=MODIFIER;STRAND=-1;SYMBOL=CYP2A6;SYMBOL_SOURCE=HGNC;HGNC_ID=2610;NEAREST=CYP2A6;INTRON=3/5
rs55921593	19:41353897	T	ENSG00000255974	ENST00000599960	Transcript	upstream_gene_variant	-	-	-	-	-	-	IMPACT=MODIFIER;DISTANCE=3140;STRAND=-1;SYMBOL=CYP2A6;SYMBOL_SOURCE=HGNC;HGNC_ID=2610;NEAREST=CYP2A6
rs55921593	19:41353897	T	ENSG00000255974	ENST00000600495	Transcript	intron_variant,NMD_transcript_variant	-	-	-	-	-	-	IMPACT=MODIFIER;STRAND=-1;SYMBOL=CYP2A6;SYMBOL_SOURCE=HGNC;HGNC_ID=2610;NEAREST=CYP2A6;INTRON=4/5
rs55921593	19:41353897	T	ENSG00000268797	ENST00000601627	Transcript	intron_variant,NMD_transcript_variant	-	-	-	-	-	-	IMPACT=MODIFIER;STRAND=1;FLAGS=cds_start_NF;SYMBOL=CTC-490E21.12;SYMBOL_SOURCE=Clone_based_vega_gene;NEAREST=CYP2A6;INTRON=1/3
rs28399443	19:41354306	A	ENSG00000255974	ENST00000301141	Transcript	intron_variant	-	-	-	-	-	-	IMPACT=MODIFIER;STRAND=-1;SYMBOL=CYP2A6;SYMBOL_SOURCE=HGNC;HGNC_ID=2610;NEAREST=CYP2A6;INTRON=3/8
rs28399443	19:41354306	A	ENSG00000255974	ENST00000596719	Transcript	intron_variant,non_coding_transcript_variant	-	-	-	-	-	-	IMPACT=MODIFIER;STRAND=-1;SYMBOL=CYP2A6;SYMBOL_SOURCE=HGNC;HGNC_ID=2610;NEAREST=CYP2A6;INTRON=2/5
rs28399443	19:41354306	A	ENSG00000255974	ENST00000599960	Transcript	upstream_gene_variant	-	-	-	-	-	-	IMPACT=MODIFIER;DISTANCE=3549;STRAND=-1;SYMBOL=CYP2A6;SYMBOL_SOURCE=HGNC;HGNC_ID=2610;NEAREST=CYP2A6
rs28399443	19:41354306	A	ENSG00000255974	ENST00000600495	Transcript	intron_variant,NMD_transcript_variant	-	-	-	-	-	-	IMPACT=MODIFIER;STRAND=-1;SYMBOL=CYP2A6;SYMBOL_SOURCE=HGNC;HGNC_ID=2610;NEAREST=CYP2A6;INTRON=3/5
rs28399443	19:41354306	A	ENSG00000268797	ENST00000601627	Transcript	intron_variant,NMD_transcript_variant	-	-	-	-	-	-	IMPACT=MODIFIER;STRAND=1;FLAGS=cds_start_NF;SYMBOL=CTC-490E21.12;SYMBOL_SOURCE=Clone_based_vega_gene;NEAREST=CYP2A6;INTRON=1/3
rs28399443	19:41354306	A	-	ENSR00000109598	RegulatoryFeature	regulatory_region_variant	-	-	-	-	-	-	IMPACT=MODIFIER;NEAREST=CYP2A6;BIOTYPE=TF_binding_site
rs28399442	19:41354458	A	ENSG00000255974	ENST00000301141	Transcript	intron_variant	-	-	-	-	-	-	IMPACT=MODIFIER;STRAND=-1;SYMBOL=CYP2A6;SYMBOL_SOURCE=HGNC;HGNC_ID=2610;NEAREST=CYP2A6;INTRON=3/8
rs28399442	19:41354458	A	ENSG00000255974	ENST00000596719	Transcript	intron_variant,non_coding_transcript_variant	-	-	-	-	-	-	IMPACT=MODIFIER;STRAND=-1;SYMBOL=CYP2A6;SYMBOL_SOURCE=HGNC;HGNC_ID=2610;NEAREST=CYP2A6;INTRON=2/5
rs28399442	19:41354458	A	ENSG00000255974	ENST00000599960	Transcript	upstream_gene_variant	-	-	-	-	-	-	IMPACT=MODIFIER;DISTANCE=3701;STRAND=-1;SYMBOL=CYP2A6;SYMBOL_SOURCE=HGNC;HGNC_ID=2610;NEAREST=CYP2A6
rs28399442	19:41354458	A	ENSG00000255974	ENST00000600495	Transcript	intron_variant,NMD_transcript_variant	-	-	-	-	-	-	IMPACT=MODIFIER;STRAND=-1;SYMBOL=CYP2A6;SYMBOL_SOURCE=HGNC;HGNC_ID=2610;NEAREST=CYP2A6;INTRON=3/5
rs28399442	19:41354458	A	ENSG00000268797	ENST00000601627	Transcript	intron_variant,NMD_transcript_variant	-	-	-	-	-	-	IMPACT=MODIFIER;STRAND=1;FLAGS=cds_start_NF;SYMBOL=CTC-490E21.12;SYMBOL_SOURCE=Clone_based_vega_gene;NEAREST=CYP2A6;INTRON=1/3
rs28399442	19:41354458	A	-	ENSR00000109598	RegulatoryFeature	regulatory_region_variant	-	-	-	-	-	-	IMPACT=MODIFIER;NEAREST=CYP2A6;BIOTYPE=TF_binding_site
rs28399442	19:41354458	A	-	ENSR00000381914	RegulatoryFeature	regulatory_region_variant	-	-	-	-	-	-	IMPACT=MODIFIER;NEAREST=CYP2A6;BIOTYPE=CTCF_binding_site
rs141949574	19:41392043	A	ENSG00000130612	ENST00000252909	Transcript	upstream_gene_variant	-	-	-	-	-	-	IMPACT=MODIFIER;DISTANCE=4688;STRAND=1;SYMBOL=CYP2G1P;SYMBOL_SOURCE=HGNC;HGNC_ID=2633;NEAREST=CYP2A7
rs141949574	19:41392043	A	ENSG00000198077	ENST00000291764	Transcript	upstream_gene_variant	-	-	-	-	-	-	IMPACT=MODIFIER;DISTANCE=3386;STRAND=-1;SYMBOL=CYP2A7;SYMBOL_SOURCE=HGNC;HGNC_ID=2611;NEAREST=CYP2A7
rs141949574	19:41392043	A	ENSG00000198077	ENST00000301146	Transcript	upstream_gene_variant	-	-	-	-	-	-	IMPACT=MODIFIER;DISTANCE=3386;STRAND=-1;SYMBOL=CYP2A7;SYMBOL_SOURCE=HGNC;HGNC_ID=2611;NEAREST=CYP2A7
rs141949574	19:41392043	A	ENSG00000198077	ENST00000594332	Transcript	upstream_gene_variant	-	-	-	-	-	-	IMPACT=MODIFIER;DISTANCE=3907;STRAND=-1;SYMBOL=CYP2A7;SYMBOL_SOURCE=HGNC;HGNC_ID=2611;NEAREST=CYP2A7
rs141949574	19:41392043	A	ENSG00000268797	ENST00000601627	Transcript	intron_variant,NMD_transcript_variant	-	-	-	-	-	-	IMPACT=MODIFIER;STRAND=1;FLAGS=cds_start_NF;SYMBOL=CTC-490E21.12;SYMBOL_SOURCE=Clone_based_vega_gene;NEAREST=CYP2A7;INTRON=1/3
rs79600176	19:41392490	C	ENSG00000130612	ENST00000252909	Transcript	upstream_gene_variant	-	-	-	-	-	-	IMPACT=MODIFIER;DISTANCE=4241;STRAND=1;SYMBOL=CYP2G1P;SYMBOL_SOURCE=HGNC;HGNC_ID=2633;NEAREST=CYP2A7
rs79600176	19:41392490	C	ENSG00000198077	ENST00000291764	Transcript	upstream_gene_variant	-	-	-	-	-	-	IMPACT=MODIFIER;DISTANCE=3833;STRAND=-1;SYMBOL=CYP2A7;SYMBOL_SOURCE=HGNC;HGNC_ID=2611;NEAREST=CYP2A7
rs79600176	19:41392490	C	ENSG00000198077	ENST00000301146	Transcript	upstream_gene_variant	-	-	-	-	-	-	IMPACT=MODIFIER;DISTANCE=3833;STRAND=-1;SYMBOL=CYP2A7;SYMBOL_SOURCE=HGNC;HGNC_ID=2611;NEAREST=CYP2A7
rs79600176	19:41392490	C	ENSG00000198077	ENST00000594332	Transcript	upstream_gene_variant	-	-	-	-	-	-	IMPACT=MODIFIER;DISTANCE=4354;STRAND=-1;SYMBOL=CYP2A7;SYMBOL_SOURCE=HGNC;HGNC_ID=2611;NEAREST=CYP2A7
rs79600176	19:41392490	C	ENSG00000130612	ENST00000597833	Transcript	upstream_gene_variant	-	-	-	-	-	-	IMPACT=MODIFIER;DISTANCE=4634;STRAND=1;SYMBOL=CYP2G1P;SYMBOL_SOURCE=HGNC;HGNC_ID=2633;NEAREST=CYP2A7
rs79600176	19:41392490	C	ENSG00000268797	ENST00000601627	Transcript	intron_variant,NMD_transcript_variant	-	-	-	-	-	-	IMPACT=MODIFIER;STRAND=1;FLAGS=cds_start_NF;SYMBOL=CTC-490E21.12;SYMBOL_SOURCE=Clone_based_vega_gene;NEAREST=CYP2A7;INTRON=1/3
rs117683060	19:41394102	G	ENSG00000130612	ENST00000252909	Transcript	upstream_gene_variant	-	-	-	-	-	-	IMPACT=MODIFIER;DISTANCE=2629;STRAND=1;SYMBOL=CYP2G1P;SYMBOL_SOURCE=HGNC;HGNC_ID=2633;NEAREST=CYP2A7
rs117683060	19:41394102	G	ENSG00000130612	ENST00000597833	Transcript	upstream_gene_variant	-	-	-	-	-	-	IMPACT=MODIFIER;DISTANCE=3022;STRAND=1;SYMBOL=CYP2G1P;SYMBOL_SOURCE=HGNC;HGNC_ID=2633;NEAREST=CYP2A7
rs117683060	19:41394102	G	ENSG00000268797	ENST00000601627	Transcript	intron_variant,NMD_transcript_variant	-	-	-	-	-	-	IMPACT=MODIFIER;STRAND=1;FLAGS=cds_start_NF;SYMBOL=CTC-490E21.12;SYMBOL_SOURCE=Clone_based_vega_gene;NEAREST=CYP2A7;INTRON=1/3
rs117540499	19:41406448	A	ENSG00000130612	ENST00000252909	Transcript	downstream_gene_variant	-	-	-	-	-	-	IMPACT=MODIFIER;DISTANCE=35;STRAND=1;SYMBOL=CYP2G1P;SYMBOL_SOURCE=HGNC;HGNC_ID=2633;NEAREST=CYP2A7
rs117540499	19:41406448	A	ENSG00000130612	ENST00000597833	Transcript	downstream_gene_variant	-	-	-	-	-	-	IMPACT=MODIFIER;DISTANCE=521;STRAND=1;SYMBOL=CYP2G1P;SYMBOL_SOURCE=HGNC;HGNC_ID=2633;NEAREST=CYP2A7
rs117540499	19:41406448	A	ENSG00000268797	ENST00000601627	Transcript	downstream_gene_variant	-	-	-	-	-	-	IMPACT=MODIFIER;DISTANCE=2261;STRAND=1;FLAGS=cds_start_NF;SYMBOL=CTC-490E21.12;SYMBOL_SOURCE=Clone_based_vega_gene;NEAREST=CYP2A7
rs73931391	19:41407874	G	ENSG00000130612	ENST00000252909	Transcript	downstream_gene_variant	-	-	-	-	-	-	IMPACT=MODIFIER;DISTANCE=1461;STRAND=1;SYMBOL=CYP2G1P;SYMBOL_SOURCE=HGNC;HGNC_ID=2633;NEAREST=CYP2A7
rs73931391	19:41407874	G	ENSG00000130612	ENST00000597833	Transcript	downstream_gene_variant	-	-	-	-	-	-	IMPACT=MODIFIER;DISTANCE=1947;STRAND=1;SYMBOL=CYP2G1P;SYMBOL_SOURCE=HGNC;HGNC_ID=2633;NEAREST=CYP2A7
rs73931391	19:41407874	G	ENSG00000268797	ENST00000601627	Transcript	downstream_gene_variant	-	-	-	-	-	-	IMPACT=MODIFIER;DISTANCE=3687;STRAND=1;FLAGS=cds_start_NF;SYMBOL=CTC-490E21.12;SYMBOL_SOURCE=Clone_based_vega_gene;NEAREST=CYP2A7
rs2238691	19:46179043	A	ENSG00000010310	ENST00000263281	Transcript	intron_variant	-	-	-	-	-	-	IMPACT=MODIFIER;STRAND=1;SYMBOL=GIPR;SYMBOL_SOURCE=HGNC;HGNC_ID=4271;NEAREST=GIPR;INTRON=7/12
rs2238691	19:46179043	A	ENSG00000010310	ENST00000304207	Transcript	intron_variant	-	-	-	-	-	-	IMPACT=MODIFIER;STRAND=1;SYMBOL=GIPR;SYMBOL_SOURCE=HGNC;HGNC_ID=4271;NEAREST=GIPR;INTRON=6/12
rs2238691	19:46179043	A	ENSG00000207773	ENST00000385039	Transcript	downstream_gene_variant	-	-	-	-	-	-	IMPACT=MODIFIER;DISTANCE=761;STRAND=1;SYMBOL=MIR642A;SYMBOL_SOURCE=HGNC;HGNC_ID=32898;NEAREST=GIPR
rs2238691	19:46179043	A	ENSG00000010310	ENST00000585889	Transcript	intron_variant,NMD_transcript_variant	-	-	-	-	-	-	IMPACT=MODIFIER;STRAND=1;SYMBOL=GIPR;SYMBOL_SOURCE=HGNC;HGNC_ID=4271;NEAREST=GIPR;INTRON=7/11
rs2238691	19:46179043	A	ENSG00000010310	ENST00000588816	Transcript	downstream_gene_variant	-	-	-	-	-	-	IMPACT=MODIFIER;DISTANCE=373;STRAND=1;SYMBOL=GIPR;SYMBOL_SOURCE=HGNC;HGNC_ID=4271;NEAREST=GIPR
rs2238691	19:46179043	A	ENSG00000010310	ENST00000590918	Transcript	intron_variant	-	-	-	-	-	-	IMPACT=MODIFIER;STRAND=1;SYMBOL=GIPR;SYMBOL_SOURCE=HGNC;HGNC_ID=4271;NEAREST=GIPR;INTRON=7/13
rs2238691	19:46179043	A	ENSG00000010310	ENST00000591224	Transcript	upstream_gene_variant	-	-	-	-	-	-	IMPACT=MODIFIER;DISTANCE=1741;STRAND=1;SYMBOL=GIPR;SYMBOL_SOURCE=HGNC;HGNC_ID=4271;NEAREST=GIPR
rs2238691	19:46179043	A	ENSG00000010310	ENST00000591322	Transcript	downstream_gene_variant	-	-	-	-	-	-	IMPACT=MODIFIER;DISTANCE=4423;STRAND=1;FLAGS=cds_end_NF;SYMBOL=GIPR;SYMBOL_SOURCE=HGNC;HGNC_ID=4271;NEAREST=GIPR
rs2238691	19:46179043	A	ENSG00000010310	ENST00000593127	Transcript	upstream_gene_variant	-	-	-	-	-	-	IMPACT=MODIFIER;DISTANCE=1852;STRAND=1;SYMBOL=GIPR;SYMBOL_SOURCE=HGNC;HGNC_ID=4271;NEAREST=GIPR
rs2238691	19:46179043	A	-	ENSR00000382256	RegulatoryFeature	regulatory_region_variant	-	-	-	-	-	-	IMPACT=MODIFIER;NEAREST=GIPR;BIOTYPE=CTCF_binding_site
rs11672660	19:46180184	T	ENSG00000010310	ENST00000263281	Transcript	intron_variant	-	-	-	-	-	-	IMPACT=MODIFIER;STRAND=1;SYMBOL=GIPR;SYMBOL_SOURCE=HGNC;HGNC_ID=4271;NEAREST=GIPR;INTRON=7/12
rs11672660	19:46180184	T	ENSG00000010310	ENST00000304207	Transcript	intron_variant	-	-	-	-	-	-	IMPACT=MODIFIER;STRAND=1;SYMBOL=GIPR;SYMBOL_SOURCE=HGNC;HGNC_ID=4271;NEAREST=GIPR;INTRON=6/12
rs11672660	19:46180184	T	ENSG00000207773	ENST00000385039	Transcript	downstream_gene_variant	-	-	-	-	-	-	IMPACT=MODIFIER;DISTANCE=1902;STRAND=1;SYMBOL=MIR642A;SYMBOL_SOURCE=HGNC;HGNC_ID=32898;NEAREST=GIPR
rs11672660	19:46180184	T	ENSG00000010310	ENST00000585889	Transcript	intron_variant,NMD_transcript_variant	-	-	-	-	-	-	IMPACT=MODIFIER;STRAND=1;SYMBOL=GIPR;SYMBOL_SOURCE=HGNC;HGNC_ID=4271;NEAREST=GIPR;INTRON=7/11
rs11672660	19:46180184	T	ENSG00000010310	ENST00000588816	Transcript	downstream_gene_variant	-	-	-	-	-	-	IMPACT=MODIFIER;DISTANCE=1514;STRAND=1;SYMBOL=GIPR;SYMBOL_SOURCE=HGNC;HGNC_ID=4271;NEAREST=GIPR
rs11672660	19:46180184	T	ENSG00000010310	ENST00000590918	Transcript	intron_variant	-	-	-	-	-	-	IMPACT=MODIFIER;STRAND=1;SYMBOL=GIPR;SYMBOL_SOURCE=HGNC;HGNC_ID=4271;NEAREST=GIPR;INTRON=7/13
rs11672660	19:46180184	T	ENSG00000010310	ENST00000591224	Transcript	upstream_gene_variant	-	-	-	-	-	-	IMPACT=MODIFIER;DISTANCE=600;STRAND=1;SYMBOL=GIPR;SYMBOL_SOURCE=HGNC;HGNC_ID=4271;NEAREST=GIPR
rs11672660	19:46180184	T	ENSG00000010310	ENST00000593127	Transcript	upstream_gene_variant	-	-	-	-	-	-	IMPACT=MODIFIER;DISTANCE=711;STRAND=1;SYMBOL=GIPR;SYMBOL_SOURCE=HGNC;HGNC_ID=4271;NEAREST=GIPR
rs11672660	19:46180184	T	-	ENSR00000382257	RegulatoryFeature	regulatory_region_variant	-	-	-	-	-	-	IMPACT=MODIFIER;NEAREST=GIPR;BIOTYPE=promoter_flanking_region
rs34783010	19:46180414	T	ENSG00000010310	ENST00000263281	Transcript	intron_variant	-	-	-	-	-	-	IMPACT=MODIFIER;STRAND=1;SYMBOL=GIPR;SYMBOL_SOURCE=HGNC;HGNC_ID=4271;NEAREST=GIPR;INTRON=8/12
rs34783010	19:46180414	T	ENSG00000010310	ENST00000304207	Transcript	intron_variant	-	-	-	-	-	-	IMPACT=MODIFIER;STRAND=1;SYMBOL=GIPR;SYMBOL_SOURCE=HGNC;HGNC_ID=4271;NEAREST=GIPR;INTRON=7/12
rs34783010	19:46180414	T	ENSG00000207773	ENST00000385039	Transcript	downstream_gene_variant	-	-	-	-	-	-	IMPACT=MODIFIER;DISTANCE=2132;STRAND=1;SYMBOL=MIR642A;SYMBOL_SOURCE=HGNC;HGNC_ID=32898;NEAREST=GIPR
rs34783010	19:46180414	T	ENSG00000010310	ENST00000585889	Transcript	intron_variant,NMD_transcript_variant	-	-	-	-	-	-	IMPACT=MODIFIER;STRAND=1;SYMBOL=GIPR;SYMBOL_SOURCE=HGNC;HGNC_ID=4271;NEAREST=GIPR;INTRON=8/11
rs34783010	19:46180414	T	ENSG00000010310	ENST00000588816	Transcript	downstream_gene_variant	-	-	-	-	-	-	IMPACT=MODIFIER;DISTANCE=1744;STRAND=1;SYMBOL=GIPR;SYMBOL_SOURCE=HGNC;HGNC_ID=4271;NEAREST=GIPR
rs34783010	19:46180414	T	ENSG00000010310	ENST00000590918	Transcript	intron_variant	-	-	-	-	-	-	IMPACT=MODIFIER;STRAND=1;SYMBOL=GIPR;SYMBOL_SOURCE=HGNC;HGNC_ID=4271;NEAREST=GIPR;INTRON=8/13
rs34783010	19:46180414	T	ENSG00000010310	ENST00000591224	Transcript	upstream_gene_variant	-	-	-	-	-	-	IMPACT=MODIFIER;DISTANCE=370;STRAND=1;SYMBOL=GIPR;SYMBOL_SOURCE=HGNC;HGNC_ID=4271;NEAREST=GIPR
rs34783010	19:46180414	T	ENSG00000010310	ENST00000593127	Transcript	upstream_gene_variant	-	-	-	-	-	-	IMPACT=MODIFIER;DISTANCE=481;STRAND=1;SYMBOL=GIPR;SYMBOL_SOURCE=HGNC;HGNC_ID=4271;NEAREST=GIPR
rs34783010	19:46180414	T	-	ENSR00000382257	RegulatoryFeature	regulatory_region_variant	-	-	-	-	-	-	IMPACT=MODIFIER;NEAREST=GIPR;BIOTYPE=promoter_flanking_region
rs1800437	19:46181392	C	ENSG00000010310	ENST00000263281	Transcript	missense_variant	1147	1060	354	E/Q	Gag/Cag	-	IMPACT=MODERATE;STRAND=1;SYMBOL=GIPR;SYMBOL_SOURCE=HGNC;HGNC_ID=4271;NEAREST=GIPR;SIFT=deleterious(0.04);PolyPhen=probably_damaging(0.99);EXON=12/13
rs1800437	19:46181392	C	ENSG00000010310	ENST00000304207	Transcript	missense_variant	1038	952	318	E/Q	Gag/Cag	-	IMPACT=MODERATE;STRAND=1;SYMBOL=GIPR;SYMBOL_SOURCE=HGNC;HGNC_ID=4271;NEAREST=GIPR;SIFT=tolerated(0.07);PolyPhen=possibly_damaging(0.904);EXON=11/13
rs1800437	19:46181392	C	ENSG00000207773	ENST00000385039	Transcript	downstream_gene_variant	-	-	-	-	-	-	IMPACT=MODIFIER;DISTANCE=3110;STRAND=1;SYMBOL=MIR642A;SYMBOL_SOURCE=HGNC;HGNC_ID=32898;NEAREST=GIPR
rs1800437	19:46181392	C	ENSG00000010310	ENST00000585889	Transcript	3_prime_UTR_variant,NMD_transcript_variant	1015	-	-	-	-	-	IMPACT=MODIFIER;STRAND=1;SYMBOL=GIPR;SYMBOL_SOURCE=HGNC;HGNC_ID=4271;NEAREST=GIPR;EXON=10/12
rs1800437	19:46181392	C	ENSG00000010310	ENST00000588816	Transcript	downstream_gene_variant	-	-	-	-	-	-	IMPACT=MODIFIER;DISTANCE=2722;STRAND=1;SYMBOL=GIPR;SYMBOL_SOURCE=HGNC;HGNC_ID=4271;NEAREST=GIPR
rs1800437	19:46181392	C	ENSG00000010310	ENST00000590918	Transcript	missense_variant	1159	1060	354	E/Q	Gag/Cag	-	IMPACT=MODERATE;STRAND=1;SYMBOL=GIPR;SYMBOL_SOURCE=HGNC;HGNC_ID=4271;NEAREST=GIPR;SIFT=deleterious(0.05);PolyPhen=probably_damaging(0.999);EXON=12/14
rs1800437	19:46181392	C	ENSG00000010310	ENST00000591224	Transcript	non_coding_transcript_exon_variant	516	-	-	-	-	-	IMPACT=MODIFIER;STRAND=1;SYMBOL=GIPR;SYMBOL_SOURCE=HGNC;HGNC_ID=4271;NEAREST=GIPR;EXON=2/2
rs1800437	19:46181392	C	ENSG00000010310	ENST00000593127	Transcript	downstream_gene_variant	-	-	-	-	-	-	IMPACT=MODIFIER;DISTANCE=8;STRAND=1;SYMBOL=GIPR;SYMBOL_SOURCE=HGNC;HGNC_ID=4271;NEAREST=GIPR
rs1800437	19:46181392	C	-	ENSR00000382257	RegulatoryFeature	regulatory_region_variant	-	-	-	-	-	-	IMPACT=MODIFIER;NEAREST=GIPR;BIOTYPE=promoter_flanking_region
rs1800437	19:46181392	C	-	MA0139.1	MotifFeature	TF_binding_site_variant	-	-	-	-	-	-	IMPACT=MODIFIER;STRAND=1;NEAREST=GIPR;MOTIF_NAME=CTCF:MA0139.1;MOTIF_POS=8;HIGH_INF_POS=N;MOTIF_SCORE_CHANGE=0.028
rs10423928	19:46182304	A	ENSG00000010310	ENST00000263281	Transcript	intron_variant	-	-	-	-	-	-	IMPACT=MODIFIER;STRAND=1;SYMBOL=GIPR;SYMBOL_SOURCE=HGNC;HGNC_ID=4271;NEAREST=GIPR;INTRON=12/12
rs10423928	19:46182304	A	ENSG00000010310	ENST00000304207	Transcript	intron_variant	-	-	-	-	-	-	IMPACT=MODIFIER;STRAND=1;SYMBOL=GIPR;SYMBOL_SOURCE=HGNC;HGNC_ID=4271;NEAREST=GIPR;INTRON=11/12
rs10423928	19:46182304	A	ENSG00000207773	ENST00000385039	Transcript	downstream_gene_variant	-	-	-	-	-	-	IMPACT=MODIFIER;DISTANCE=4022;STRAND=1;SYMBOL=MIR642A;SYMBOL_SOURCE=HGNC;HGNC_ID=32898;NEAREST=GIPR
rs10423928	19:46182304	A	ENSG00000010310	ENST00000585889	Transcript	intron_variant,NMD_transcript_variant	-	-	-	-	-	-	IMPACT=MODIFIER;STRAND=1;SYMBOL=GIPR;SYMBOL_SOURCE=HGNC;HGNC_ID=4271;NEAREST=GIPR;INTRON=10/11
rs10423928	19:46182304	A	ENSG00000010310	ENST00000588816	Transcript	downstream_gene_variant	-	-	-	-	-	-	IMPACT=MODIFIER;DISTANCE=3634;STRAND=1;SYMBOL=GIPR;SYMBOL_SOURCE=HGNC;HGNC_ID=4271;NEAREST=GIPR
rs10423928	19:46182304	A	ENSG00000010310	ENST00000590918	Transcript	intron_variant	-	-	-	-	-	-	IMPACT=MODIFIER;STRAND=1;SYMBOL=GIPR;SYMBOL_SOURCE=HGNC;HGNC_ID=4271;NEAREST=GIPR;INTRON=12/13
rs10423928	19:46182304	A	ENSG00000010310	ENST00000591224	Transcript	downstream_gene_variant	-	-	-	-	-	-	IMPACT=MODIFIER;DISTANCE=646;STRAND=1;SYMBOL=GIPR;SYMBOL_SOURCE=HGNC;HGNC_ID=4271;NEAREST=GIPR
rs10423928	19:46182304	A	ENSG00000010310	ENST00000593127	Transcript	downstream_gene_variant	-	-	-	-	-	-	IMPACT=MODIFIER;DISTANCE=920;STRAND=1;SYMBOL=GIPR;SYMBOL_SOURCE=HGNC;HGNC_ID=4271;NEAREST=GIPR
rs10423928	19:46182304	A	-	ENSR00000382258	RegulatoryFeature	regulatory_region_variant	-	-	-	-	-	-	IMPACT=MODIFIER;NEAREST=GIPR;BIOTYPE=CTCF_binding_site
rs61373376	19:46183586	T	ENSG00000010310	ENST00000263281	Transcript	intron_variant	-	-	-	-	-	-	IMPACT=MODIFIER;STRAND=1;SYMBOL=GIPR;SYMBOL_SOURCE=HGNC;HGNC_ID=4271;NEAREST=GIPR;INTRON=12/12
rs61373376	19:46183586	T	ENSG00000010310	ENST00000304207	Transcript	intron_variant	-	-	-	-	-	-	IMPACT=MODIFIER;STRAND=1;SYMBOL=GIPR;SYMBOL_SOURCE=HGNC;HGNC_ID=4271;NEAREST=GIPR;INTRON=11/12
rs61373376	19:46183586	T	ENSG00000010310	ENST00000585889	Transcript	intron_variant,NMD_transcript_variant	-	-	-	-	-	-	IMPACT=MODIFIER;STRAND=1;SYMBOL=GIPR;SYMBOL_SOURCE=HGNC;HGNC_ID=4271;NEAREST=GIPR;INTRON=10/11
rs61373376	19:46183586	T	ENSG00000010310	ENST00000588816	Transcript	downstream_gene_variant	-	-	-	-	-	-	IMPACT=MODIFIER;DISTANCE=4916;STRAND=1;SYMBOL=GIPR;SYMBOL_SOURCE=HGNC;HGNC_ID=4271;NEAREST=GIPR
rs61373376	19:46183586	T	ENSG00000010310	ENST00000590918	Transcript	intron_variant	-	-	-	-	-	-	IMPACT=MODIFIER;STRAND=1;SYMBOL=GIPR;SYMBOL_SOURCE=HGNC;HGNC_ID=4271;NEAREST=GIPR;INTRON=12/13
rs61373376	19:46183586	T	ENSG00000010310	ENST00000591224	Transcript	downstream_gene_variant	-	-	-	-	-	-	IMPACT=MODIFIER;DISTANCE=1928;STRAND=1;SYMBOL=GIPR;SYMBOL_SOURCE=HGNC;HGNC_ID=4271;NEAREST=GIPR
rs61373376	19:46183586	T	ENSG00000010310	ENST00000593127	Transcript	downstream_gene_variant	-	-	-	-	-	-	IMPACT=MODIFIER;DISTANCE=2202;STRAND=1;SYMBOL=GIPR;SYMBOL_SOURCE=HGNC;HGNC_ID=4271;NEAREST=GIPR
rs61373376	19:46183586	T	-	ENSR00000382260	RegulatoryFeature	regulatory_region_variant	-	-	-	-	-	-	IMPACT=MODIFIER;NEAREST=GIPR;BIOTYPE=CTCF_binding_site
rs74889068	19:46199363	A	ENSG00000011478	ENST00000012049	Transcript	intron_variant	-	-	-	-	-	-	IMPACT=MODIFIER;STRAND=1;SYMBOL=QPCTL;SYMBOL_SOURCE=HGNC;HGNC_ID=25952;NEAREST=QPCTL;INTRON=3/6
rs74889068	19:46199363	A	ENSG00000125743	ENST00000342669	Transcript	upstream_gene_variant	-	-	-	-	-	-	IMPACT=MODIFIER;DISTANCE=3772;STRAND=-1;SYMBOL=SNRPD2;SYMBOL_SOURCE=HGNC;HGNC_ID=11159;NEAREST=QPCTL
rs74889068	19:46199363	A	ENSG00000011478	ENST00000366382	Transcript	intron_variant	-	-	-	-	-	-	IMPACT=MODIFIER;STRAND=1;SYMBOL=QPCTL;SYMBOL_SOURCE=HGNC;HGNC_ID=25952;NEAREST=QPCTL;INTRON=2/5
rs74889068	19:46199363	A	ENSG00000125743	ENST00000391932	Transcript	upstream_gene_variant	-	-	-	-	-	-	IMPACT=MODIFIER;DISTANCE=4164;STRAND=-1;SYMBOL=SNRPD2;SYMBOL_SOURCE=HGNC;HGNC_ID=11159;NEAREST=QPCTL
rs74889068	19:46199363	A	ENSG00000125743	ENST00000585392	Transcript	upstream_gene_variant	-	-	-	-	-	-	IMPACT=MODIFIER;DISTANCE=4217;STRAND=-1;SYMBOL=SNRPD2;SYMBOL_SOURCE=HGNC;HGNC_ID=11159;NEAREST=QPCTL
rs74889068	19:46199363	A	ENSG00000125743	ENST00000587367	Transcript	upstream_gene_variant	-	-	-	-	-	-	IMPACT=MODIFIER;DISTANCE=4165;STRAND=-1;SYMBOL=SNRPD2;SYMBOL_SOURCE=HGNC;HGNC_ID=11159;NEAREST=QPCTL
rs74889068	19:46199363	A	ENSG00000125743	ENST00000587579	Transcript	upstream_gene_variant	-	-	-	-	-	-	IMPACT=MODIFIER;DISTANCE=3536;STRAND=-1;SYMBOL=SNRPD2;SYMBOL_SOURCE=HGNC;HGNC_ID=11159;NEAREST=QPCTL
rs74889068	19:46199363	A	ENSG00000125743	ENST00000588301	Transcript	upstream_gene_variant	-	-	-	-	-	-	IMPACT=MODIFIER;DISTANCE=3789;STRAND=-1;SYMBOL=SNRPD2;SYMBOL_SOURCE=HGNC;HGNC_ID=11159;NEAREST=QPCTL
rs74889068	19:46199363	A	ENSG00000125743	ENST00000588599	Transcript	upstream_gene_variant	-	-	-	-	-	-	IMPACT=MODIFIER;DISTANCE=4334;STRAND=-1;SYMBOL=SNRPD2;SYMBOL_SOURCE=HGNC;HGNC_ID=11159;NEAREST=QPCTL
rs74889068	19:46199363	A	ENSG00000125743	ENST00000590212	Transcript	upstream_gene_variant	-	-	-	-	-	-	IMPACT=MODIFIER;DISTANCE=4188;STRAND=-1;SYMBOL=SNRPD2;SYMBOL_SOURCE=HGNC;HGNC_ID=11159;NEAREST=QPCTL
rs74889068	19:46199363	A	ENSG00000011478	ENST00000591606	Transcript	intron_variant,NMD_transcript_variant	-	-	-	-	-	-	IMPACT=MODIFIER;STRAND=1;FLAGS=cds_start_NF;SYMBOL=QPCTL;SYMBOL_SOURCE=HGNC;HGNC_ID=25952;NEAREST=QPCTL;INTRON=3/4
rs74889068	19:46199363	A	ENSG00000011478	ENST00000592769	Transcript	upstream_gene_variant	-	-	-	-	-	-	IMPACT=MODIFIER;DISTANCE=2375;STRAND=1;SYMBOL=QPCTL;SYMBOL_SOURCE=HGNC;HGNC_ID=25952;NEAREST=QPCTL
rs2287019	19:46202172	T	ENSG00000011478	ENST00000012049	Transcript	intron_variant	-	-	-	-	-	-	IMPACT=MODIFIER;STRAND=1;SYMBOL=QPCTL;SYMBOL_SOURCE=HGNC;HGNC_ID=25952;NEAREST=QPCTL;INTRON=5/6
rs2287019	19:46202172	T	ENSG00000011478	ENST00000366382	Transcript	intron_variant	-	-	-	-	-	-	IMPACT=MODIFIER;STRAND=1;SYMBOL=QPCTL;SYMBOL_SOURCE=HGNC;HGNC_ID=25952;NEAREST=QPCTL;INTRON=4/5
rs2287019	19:46202172	T	ENSG00000011478	ENST00000591606	Transcript	downstream_gene_variant	-	-	-	-	-	-	IMPACT=MODIFIER;DISTANCE=89;STRAND=1;FLAGS=cds_start_NF;SYMBOL=QPCTL;SYMBOL_SOURCE=HGNC;HGNC_ID=25952;NEAREST=QPCTL
rs2287019	19:46202172	T	ENSG00000011478	ENST00000592769	Transcript	intron_variant,non_coding_transcript_variant	-	-	-	-	-	-	IMPACT=MODIFIER;STRAND=1;SYMBOL=QPCTL;SYMBOL_SOURCE=HGNC;HGNC_ID=25952;NEAREST=QPCTL;INTRON=2/2
rs35106244	19:49203829	T	ENSG00000176920	ENST00000391876	Transcript	intron_variant	-	-	-	-	-	-	IMPACT=MODIFIER;STRAND=1;SYMBOL=FUT2;SYMBOL_SOURCE=HGNC;HGNC_ID=4013;NEAREST=FUT2;INTRON=1/2
rs35106244	19:49203829	T	ENSG00000176920	ENST00000425340	Transcript	intron_variant	-	-	-	-	-	-	IMPACT=MODIFIER;STRAND=1;SYMBOL=FUT2;SYMBOL_SOURCE=HGNC;HGNC_ID=4013;NEAREST=FUT2;INTRON=1/1
rs35106244	19:49203829	T	ENSG00000176920	ENST00000522283	Transcript	downstream_gene_variant	-	-	-	-	-	-	IMPACT=MODIFIER;DISTANCE=3929;STRAND=1;SYMBOL=FUT2;SYMBOL_SOURCE=HGNC;HGNC_ID=4013;NEAREST=FUT2
rs35106244	19:49203829	T	ENSG00000176920	ENST00000522966	Transcript	intron_variant	-	-	-	-	-	-	IMPACT=MODIFIER;STRAND=1;FLAGS=cds_end_NF;SYMBOL=FUT2;SYMBOL_SOURCE=HGNC;HGNC_ID=4013;NEAREST=FUT2;INTRON=1/1
rs679574	19:49206108	G	ENSG00000176920	ENST00000391876	Transcript	intron_variant	-	-	-	-	-	-	IMPACT=MODIFIER;STRAND=1;SYMBOL=FUT2;SYMBOL_SOURCE=HGNC;HGNC_ID=4013;NEAREST=FUT2;INTRON=1/2
rs679574	19:49206108	G	ENSG00000176920	ENST00000425340	Transcript	intron_variant	-	-	-	-	-	-	IMPACT=MODIFIER;STRAND=1;SYMBOL=FUT2;SYMBOL_SOURCE=HGNC;HGNC_ID=4013;NEAREST=FUT2;INTRON=1/1
rs679574	19:49206108	G	ENSG00000176920	ENST00000522966	Transcript	intron_variant	-	-	-	-	-	-	IMPACT=MODIFIER;STRAND=1;FLAGS=cds_end_NF;SYMBOL=FUT2;SYMBOL_SOURCE=HGNC;HGNC_ID=4013;NEAREST=FUT2;INTRON=1/1
rs516316	19:49206145	C	ENSG00000176920	ENST00000391876	Transcript	intron_variant	-	-	-	-	-	-	IMPACT=MODIFIER;STRAND=1;SYMBOL=FUT2;SYMBOL_SOURCE=HGNC;HGNC_ID=4013;NEAREST=FUT2;INTRON=1/2
rs516316	19:49206145	C	ENSG00000176920	ENST00000425340	Transcript	intron_variant	-	-	-	-	-	-	IMPACT=MODIFIER;STRAND=1;SYMBOL=FUT2;SYMBOL_SOURCE=HGNC;HGNC_ID=4013;NEAREST=FUT2;INTRON=1/1
rs516316	19:49206145	C	ENSG00000176920	ENST00000522966	Transcript	intron_variant	-	-	-	-	-	-	IMPACT=MODIFIER;STRAND=1;FLAGS=cds_end_NF;SYMBOL=FUT2;SYMBOL_SOURCE=HGNC;HGNC_ID=4013;NEAREST=FUT2;INTRON=1/1
rs516246	19:49206172	T	ENSG00000176920	ENST00000391876	Transcript	intron_variant	-	-	-	-	-	-	IMPACT=MODIFIER;STRAND=1;SYMBOL=FUT2;SYMBOL_SOURCE=HGNC;HGNC_ID=4013;NEAREST=FUT2;INTRON=1/2
rs516246	19:49206172	T	ENSG00000176920	ENST00000425340	Transcript	intron_variant	-	-	-	-	-	-	IMPACT=MODIFIER;STRAND=1;SYMBOL=FUT2;SYMBOL_SOURCE=HGNC;HGNC_ID=4013;NEAREST=FUT2;INTRON=1/1
rs516246	19:49206172	T	ENSG00000176920	ENST00000522966	Transcript	intron_variant	-	-	-	-	-	-	IMPACT=MODIFIER;STRAND=1;FLAGS=cds_end_NF;SYMBOL=FUT2;SYMBOL_SOURCE=HGNC;HGNC_ID=4013;NEAREST=FUT2;INTRON=1/1
rs492602	19:49206417	G	ENSG00000176920	ENST00000391876	Transcript	synonymous_variant	311	204	68	A	gcA/gcG	-	IMPACT=LOW;STRAND=1;SYMBOL=FUT2;SYMBOL_SOURCE=HGNC;HGNC_ID=4013;NEAREST=FUT2;EXON=2/3
rs492602	19:49206417	G	ENSG00000176920	ENST00000425340	Transcript	synonymous_variant	321	204	68	A	gcA/gcG	-	IMPACT=LOW;STRAND=1;SYMBOL=FUT2;SYMBOL_SOURCE=HGNC;HGNC_ID=4013;NEAREST=FUT2;EXON=2/2
rs492602	19:49206417	G	ENSG00000176920	ENST00000522966	Transcript	synonymous_variant	315	204	68	A	gcA/gcG	-	IMPACT=LOW;STRAND=1;FLAGS=cds_end_NF;SYMBOL=FUT2;SYMBOL_SOURCE=HGNC;HGNC_ID=4013;NEAREST=FUT2;EXON=2/2
rs681343	19:49206462	T	ENSG00000176920	ENST00000391876	Transcript	synonymous_variant	356	249	83	Y	taC/taT	-	IMPACT=LOW;STRAND=1;SYMBOL=FUT2;SYMBOL_SOURCE=HGNC;HGNC_ID=4013;NEAREST=FUT2;EXON=2/3
rs681343	19:49206462	T	ENSG00000176920	ENST00000425340	Transcript	synonymous_variant	366	249	83	Y	taC/taT	-	IMPACT=LOW;STRAND=1;SYMBOL=FUT2;SYMBOL_SOURCE=HGNC;HGNC_ID=4013;NEAREST=FUT2;EXON=2/2
rs681343	19:49206462	T	ENSG00000176920	ENST00000522966	Transcript	synonymous_variant	360	249	83	Y	taC/taT	-	IMPACT=LOW;STRAND=1;FLAGS=cds_end_NF;SYMBOL=FUT2;SYMBOL_SOURCE=HGNC;HGNC_ID=4013;NEAREST=FUT2;EXON=2/2
rs281377	19:49206603	T	ENSG00000176920	ENST00000391876	Transcript	synonymous_variant	497	390	130	N	aaC/aaT	-	IMPACT=LOW;STRAND=1;SYMBOL=FUT2;SYMBOL_SOURCE=HGNC;HGNC_ID=4013;NEAREST=FUT2;EXON=2/3
rs281377	19:49206603	T	ENSG00000176920	ENST00000425340	Transcript	synonymous_variant	507	390	130	N	aaC/aaT	-	IMPACT=LOW;STRAND=1;SYMBOL=FUT2;SYMBOL_SOURCE=HGNC;HGNC_ID=4013;NEAREST=FUT2;EXON=2/2
rs281377	19:49206603	T	ENSG00000176920	ENST00000522966	Transcript	synonymous_variant	501	390	130	N	aaC/aaT	-	IMPACT=LOW;STRAND=1;FLAGS=cds_end_NF;SYMBOL=FUT2;SYMBOL_SOURCE=HGNC;HGNC_ID=4013;NEAREST=FUT2;EXON=2/2
rs601338	19:49206674	A	ENSG00000176920	ENST00000391876	Transcript	stop_gained	568	461	154	W/*	tGg/tAg	-	IMPACT=HIGH;STRAND=1;SYMBOL=FUT2;SYMBOL_SOURCE=HGNC;HGNC_ID=4013;NEAREST=FUT2;EXON=2/3
rs601338	19:49206674	A	ENSG00000176920	ENST00000425340	Transcript	stop_gained	578	461	154	W/*	tGg/tAg	-	IMPACT=HIGH;STRAND=1;SYMBOL=FUT2;SYMBOL_SOURCE=HGNC;HGNC_ID=4013;NEAREST=FUT2;EXON=2/2
rs601338	19:49206674	A	ENSG00000176920	ENST00000522966	Transcript	stop_gained	572	461	154	W/*	tGg/tAg	-	IMPACT=HIGH;STRAND=1;FLAGS=cds_end_NF;SYMBOL=FUT2;SYMBOL_SOURCE=HGNC;HGNC_ID=4013;NEAREST=FUT2;EXON=2/2
rs602662	19:49206985	A	ENSG00000176920	ENST00000391876	Transcript	missense_variant	879	772	258	G/S	Ggt/Agt	-	IMPACT=MODERATE;STRAND=1;SYMBOL=FUT2;SYMBOL_SOURCE=HGNC;HGNC_ID=4013;NEAREST=FUT2;SIFT=tolerated(0.07);PolyPhen=probably_damaging(0.982);EXON=2/3
rs602662	19:49206985	A	ENSG00000176920	ENST00000425340	Transcript	missense_variant	889	772	258	G/S	Ggt/Agt	-	IMPACT=MODERATE;STRAND=1;SYMBOL=FUT2;SYMBOL_SOURCE=HGNC;HGNC_ID=4013;NEAREST=FUT2;SIFT=tolerated(0.07);PolyPhen=probably_damaging(0.982);EXON=2/2
rs602662	19:49206985	A	ENSG00000176920	ENST00000522966	Transcript	downstream_gene_variant	-	-	-	-	-	-	IMPACT=MODIFIER;DISTANCE=112;STRAND=1;FLAGS=cds_end_NF;SYMBOL=FUT2;SYMBOL_SOURCE=HGNC;HGNC_ID=4013;NEAREST=FUT2
rs485186	19:49207206	G	ENSG00000176920	ENST00000391876	Transcript	synonymous_variant	1100	993	331	T	acA/acG	-	IMPACT=LOW;STRAND=1;SYMBOL=FUT2;SYMBOL_SOURCE=HGNC;HGNC_ID=4013;NEAREST=FUT2;EXON=2/3
rs485186	19:49207206	G	ENSG00000176920	ENST00000425340	Transcript	synonymous_variant	1110	993	331	T	acA/acG	-	IMPACT=LOW;STRAND=1;SYMBOL=FUT2;SYMBOL_SOURCE=HGNC;HGNC_ID=4013;NEAREST=FUT2;EXON=2/2
rs485186	19:49207206	G	ENSG00000176920	ENST00000522966	Transcript	downstream_gene_variant	-	-	-	-	-	-	IMPACT=MODIFIER;DISTANCE=333;STRAND=1;FLAGS=cds_end_NF;SYMBOL=FUT2;SYMBOL_SOURCE=HGNC;HGNC_ID=4013;NEAREST=FUT2
rs485073	19:49207255	G	ENSG00000176920	ENST00000391876	Transcript	3_prime_UTR_variant	1149	-	-	-	-	-	IMPACT=MODIFIER;STRAND=1;SYMBOL=FUT2;SYMBOL_SOURCE=HGNC;HGNC_ID=4013;NEAREST=FUT2;EXON=2/3
rs485073	19:49207255	G	ENSG00000176920	ENST00000425340	Transcript	3_prime_UTR_variant	1159	-	-	-	-	-	IMPACT=MODIFIER;STRAND=1;SYMBOL=FUT2;SYMBOL_SOURCE=HGNC;HGNC_ID=4013;NEAREST=FUT2;EXON=2/2
rs485073	19:49207255	G	ENSG00000176920	ENST00000522966	Transcript	downstream_gene_variant	-	-	-	-	-	-	IMPACT=MODIFIER;DISTANCE=382;STRAND=1;FLAGS=cds_end_NF;SYMBOL=FUT2;SYMBOL_SOURCE=HGNC;HGNC_ID=4013;NEAREST=FUT2
rs603985	19:49207257	C	ENSG00000176920	ENST00000391876	Transcript	3_prime_UTR_variant	1151	-	-	-	-	-	IMPACT=MODIFIER;STRAND=1;SYMBOL=FUT2;SYMBOL_SOURCE=HGNC;HGNC_ID=4013;NEAREST=FUT2;EXON=2/3
rs603985	19:49207257	C	ENSG00000176920	ENST00000425340	Transcript	3_prime_UTR_variant	1161	-	-	-	-	-	IMPACT=MODIFIER;STRAND=1;SYMBOL=FUT2;SYMBOL_SOURCE=HGNC;HGNC_ID=4013;NEAREST=FUT2;EXON=2/2
rs603985	19:49207257	C	ENSG00000176920	ENST00000522966	Transcript	downstream_gene_variant	-	-	-	-	-	-	IMPACT=MODIFIER;DISTANCE=384;STRAND=1;FLAGS=cds_end_NF;SYMBOL=FUT2;SYMBOL_SOURCE=HGNC;HGNC_ID=4013;NEAREST=FUT2
rs571689	19:49207554	T	ENSG00000176920	ENST00000391876	Transcript	intron_variant	-	-	-	-	-	-	IMPACT=MODIFIER;STRAND=1;SYMBOL=FUT2;SYMBOL_SOURCE=HGNC;HGNC_ID=4013;NEAREST=FUT2;INTRON=2/2
rs571689	19:49207554	T	ENSG00000176920	ENST00000425340	Transcript	3_prime_UTR_variant	1458	-	-	-	-	-	IMPACT=MODIFIER;STRAND=1;SYMBOL=FUT2;SYMBOL_SOURCE=HGNC;HGNC_ID=4013;NEAREST=FUT2;EXON=2/2
rs571689	19:49207554	T	ENSG00000176920	ENST00000522966	Transcript	downstream_gene_variant	-	-	-	-	-	-	IMPACT=MODIFIER;DISTANCE=681;STRAND=1;FLAGS=cds_end_NF;SYMBOL=FUT2;SYMBOL_SOURCE=HGNC;HGNC_ID=4013;NEAREST=FUT2
rs570794	19:49207651	C	ENSG00000176920	ENST00000391876	Transcript	intron_variant	-	-	-	-	-	-	IMPACT=MODIFIER;STRAND=1;SYMBOL=FUT2;SYMBOL_SOURCE=HGNC;HGNC_ID=4013;NEAREST=FUT2;INTRON=2/2
rs570794	19:49207651	C	ENSG00000176920	ENST00000425340	Transcript	3_prime_UTR_variant	1555	-	-	-	-	-	IMPACT=MODIFIER;STRAND=1;SYMBOL=FUT2;SYMBOL_SOURCE=HGNC;HGNC_ID=4013;NEAREST=FUT2;EXON=2/2
rs570794	19:49207651	C	ENSG00000176920	ENST00000522966	Transcript	downstream_gene_variant	-	-	-	-	-	-	IMPACT=MODIFIER;DISTANCE=778;STRAND=1;FLAGS=cds_end_NF;SYMBOL=FUT2;SYMBOL_SOURCE=HGNC;HGNC_ID=4013;NEAREST=FUT2
rs569970	19:49207718	C	ENSG00000176920	ENST00000391876	Transcript	intron_variant	-	-	-	-	-	-	IMPACT=MODIFIER;STRAND=1;SYMBOL=FUT2;SYMBOL_SOURCE=HGNC;HGNC_ID=4013;NEAREST=FUT2;INTRON=2/2
rs569970	19:49207718	C	ENSG00000176920	ENST00000425340	Transcript	3_prime_UTR_variant	1622	-	-	-	-	-	IMPACT=MODIFIER;STRAND=1;SYMBOL=FUT2;SYMBOL_SOURCE=HGNC;HGNC_ID=4013;NEAREST=FUT2;EXON=2/2
rs569970	19:49207718	C	ENSG00000176920	ENST00000522966	Transcript	downstream_gene_variant	-	-	-	-	-	-	IMPACT=MODIFIER;DISTANCE=845;STRAND=1;FLAGS=cds_end_NF;SYMBOL=FUT2;SYMBOL_SOURCE=HGNC;HGNC_ID=4013;NEAREST=FUT2
rs2251034	19:49207792	A	ENSG00000176920	ENST00000391876	Transcript	intron_variant	-	-	-	-	-	-	IMPACT=MODIFIER;STRAND=1;SYMBOL=FUT2;SYMBOL_SOURCE=HGNC;HGNC_ID=4013;NEAREST=FUT2;INTRON=2/2
rs2251034	19:49207792	A	ENSG00000176920	ENST00000425340	Transcript	3_prime_UTR_variant	1696	-	-	-	-	-	IMPACT=MODIFIER;STRAND=1;SYMBOL=FUT2;SYMBOL_SOURCE=HGNC;HGNC_ID=4013;NEAREST=FUT2;EXON=2/2
rs2251034	19:49207792	A	ENSG00000176920	ENST00000522966	Transcript	downstream_gene_variant	-	-	-	-	-	-	IMPACT=MODIFIER;DISTANCE=919;STRAND=1;FLAGS=cds_end_NF;SYMBOL=FUT2;SYMBOL_SOURCE=HGNC;HGNC_ID=4013;NEAREST=FUT2
rs507855	19:49208501	G	ENSG00000176920	ENST00000391876	Transcript	intron_variant	-	-	-	-	-	-	IMPACT=MODIFIER;STRAND=1;SYMBOL=FUT2;SYMBOL_SOURCE=HGNC;HGNC_ID=4013;NEAREST=FUT2;INTRON=2/2
rs507855	19:49208501	G	ENSG00000176920	ENST00000425340	Transcript	3_prime_UTR_variant	2405	-	-	-	-	-	IMPACT=MODIFIER;STRAND=1;SYMBOL=FUT2;SYMBOL_SOURCE=HGNC;HGNC_ID=4013;NEAREST=FUT2;EXON=2/2
rs507855	19:49208501	G	ENSG00000176920	ENST00000522966	Transcript	downstream_gene_variant	-	-	-	-	-	-	IMPACT=MODIFIER;DISTANCE=1628;STRAND=1;FLAGS=cds_end_NF;SYMBOL=FUT2;SYMBOL_SOURCE=HGNC;HGNC_ID=4013;NEAREST=FUT2
rs507766	19:49208543	C	ENSG00000176920	ENST00000391876	Transcript	intron_variant	-	-	-	-	-	-	IMPACT=MODIFIER;STRAND=1;SYMBOL=FUT2;SYMBOL_SOURCE=HGNC;HGNC_ID=4013;NEAREST=FUT2;INTRON=2/2
rs507766	19:49208543	C	ENSG00000176920	ENST00000425340	Transcript	3_prime_UTR_variant	2447	-	-	-	-	-	IMPACT=MODIFIER;STRAND=1;SYMBOL=FUT2;SYMBOL_SOURCE=HGNC;HGNC_ID=4013;NEAREST=FUT2;EXON=2/2
rs507766	19:49208543	C	ENSG00000176920	ENST00000522966	Transcript	downstream_gene_variant	-	-	-	-	-	-	IMPACT=MODIFIER;DISTANCE=1670;STRAND=1;FLAGS=cds_end_NF;SYMBOL=FUT2;SYMBOL_SOURCE=HGNC;HGNC_ID=4013;NEAREST=FUT2
rs507711	19:49208564	T	ENSG00000176920	ENST00000391876	Transcript	intron_variant	-	-	-	-	-	-	IMPACT=MODIFIER;STRAND=1;SYMBOL=FUT2;SYMBOL_SOURCE=HGNC;HGNC_ID=4013;NEAREST=FUT2;INTRON=2/2
rs507711	19:49208564	T	ENSG00000176920	ENST00000425340	Transcript	3_prime_UTR_variant	2468	-	-	-	-	-	IMPACT=MODIFIER;STRAND=1;SYMBOL=FUT2;SYMBOL_SOURCE=HGNC;HGNC_ID=4013;NEAREST=FUT2;EXON=2/2
rs507711	19:49208564	T	ENSG00000176920	ENST00000522966	Transcript	downstream_gene_variant	-	-	-	-	-	-	IMPACT=MODIFIER;DISTANCE=1691;STRAND=1;FLAGS=cds_end_NF;SYMBOL=FUT2;SYMBOL_SOURCE=HGNC;HGNC_ID=4013;NEAREST=FUT2
rs506897	19:49208629	C	ENSG00000176920	ENST00000391876	Transcript	splice_region_variant,3_prime_UTR_variant	1188	-	-	-	-	-	IMPACT=LOW;STRAND=1;SYMBOL=FUT2;SYMBOL_SOURCE=HGNC;HGNC_ID=4013;NEAREST=FUT2;EXON=3/3
rs506897	19:49208629	C	ENSG00000176920	ENST00000425340	Transcript	3_prime_UTR_variant	2533	-	-	-	-	-	IMPACT=MODIFIER;STRAND=1;SYMBOL=FUT2;SYMBOL_SOURCE=HGNC;HGNC_ID=4013;NEAREST=FUT2;EXON=2/2
rs506897	19:49208629	C	ENSG00000176920	ENST00000522966	Transcript	downstream_gene_variant	-	-	-	-	-	-	IMPACT=MODIFIER;DISTANCE=1756;STRAND=1;FLAGS=cds_end_NF;SYMBOL=FUT2;SYMBOL_SOURCE=HGNC;HGNC_ID=4013;NEAREST=FUT2
rs504963	19:49208865	A	ENSG00000176920	ENST00000391876	Transcript	3_prime_UTR_variant	1424	-	-	-	-	-	IMPACT=MODIFIER;STRAND=1;SYMBOL=FUT2;SYMBOL_SOURCE=HGNC;HGNC_ID=4013;NEAREST=FUT2;EXON=3/3
rs504963	19:49208865	A	ENSG00000176920	ENST00000425340	Transcript	3_prime_UTR_variant	2769	-	-	-	-	-	IMPACT=MODIFIER;STRAND=1;SYMBOL=FUT2;SYMBOL_SOURCE=HGNC;HGNC_ID=4013;NEAREST=FUT2;EXON=2/2
rs504963	19:49208865	A	ENSG00000176920	ENST00000522966	Transcript	downstream_gene_variant	-	-	-	-	-	-	IMPACT=MODIFIER;DISTANCE=1992;STRAND=1;FLAGS=cds_end_NF;SYMBOL=FUT2;SYMBOL_SOURCE=HGNC;HGNC_ID=4013;NEAREST=FUT2
rs632111	19:49208978	G	ENSG00000176920	ENST00000391876	Transcript	downstream_gene_variant	-	-	-	-	-	-	IMPACT=MODIFIER;DISTANCE=69;STRAND=1;SYMBOL=FUT2;SYMBOL_SOURCE=HGNC;HGNC_ID=4013;NEAREST=FUT2
rs632111	19:49208978	G	ENSG00000176920	ENST00000425340	Transcript	3_prime_UTR_variant	2882	-	-	-	-	-	IMPACT=MODIFIER;STRAND=1;SYMBOL=FUT2;SYMBOL_SOURCE=HGNC;HGNC_ID=4013;NEAREST=FUT2;EXON=2/2
rs632111	19:49208978	G	ENSG00000176920	ENST00000522966	Transcript	downstream_gene_variant	-	-	-	-	-	-	IMPACT=MODIFIER;DISTANCE=2105;STRAND=1;FLAGS=cds_end_NF;SYMBOL=FUT2;SYMBOL_SOURCE=HGNC;HGNC_ID=4013;NEAREST=FUT2
rs503279	19:49209010	C	ENSG00000176920	ENST00000391876	Transcript	downstream_gene_variant	-	-	-	-	-	-	IMPACT=MODIFIER;DISTANCE=101;STRAND=1;SYMBOL=FUT2;SYMBOL_SOURCE=HGNC;HGNC_ID=4013;NEAREST=FUT2
rs503279	19:49209010	C	ENSG00000176920	ENST00000425340	Transcript	3_prime_UTR_variant	2914	-	-	-	-	-	IMPACT=MODIFIER;STRAND=1;SYMBOL=FUT2;SYMBOL_SOURCE=HGNC;HGNC_ID=4013;NEAREST=FUT2;EXON=2/2
rs503279	19:49209010	C	ENSG00000176920	ENST00000522966	Transcript	downstream_gene_variant	-	-	-	-	-	-	IMPACT=MODIFIER;DISTANCE=2137;STRAND=1;FLAGS=cds_end_NF;SYMBOL=FUT2;SYMBOL_SOURCE=HGNC;HGNC_ID=4013;NEAREST=FUT2
rs633372	19:49209226	A	ENSG00000176920	ENST00000391876	Transcript	downstream_gene_variant	-	-	-	-	-	-	IMPACT=MODIFIER;DISTANCE=317;STRAND=1;SYMBOL=FUT2;SYMBOL_SOURCE=HGNC;HGNC_ID=4013;NEAREST=FUT2
rs633372	19:49209226	A	ENSG00000176920	ENST00000425340	Transcript	downstream_gene_variant	-	-	-	-	-	-	IMPACT=MODIFIER;DISTANCE=19;STRAND=1;SYMBOL=FUT2;SYMBOL_SOURCE=HGNC;HGNC_ID=4013;NEAREST=FUT2
rs633372	19:49209226	A	ENSG00000176920	ENST00000522966	Transcript	downstream_gene_variant	-	-	-	-	-	-	IMPACT=MODIFIER;DISTANCE=2353;STRAND=1;FLAGS=cds_end_NF;SYMBOL=FUT2;SYMBOL_SOURCE=HGNC;HGNC_ID=4013;NEAREST=FUT2
rs2548459	19:49209339	C	ENSG00000176920	ENST00000391876	Transcript	downstream_gene_variant	-	-	-	-	-	-	IMPACT=MODIFIER;DISTANCE=430;STRAND=1;SYMBOL=FUT2;SYMBOL_SOURCE=HGNC;HGNC_ID=4013;NEAREST=FUT2
rs2548459	19:49209339	C	ENSG00000176920	ENST00000425340	Transcript	downstream_gene_variant	-	-	-	-	-	-	IMPACT=MODIFIER;DISTANCE=132;STRAND=1;SYMBOL=FUT2;SYMBOL_SOURCE=HGNC;HGNC_ID=4013;NEAREST=FUT2
rs2548459	19:49209339	C	ENSG00000176920	ENST00000522966	Transcript	downstream_gene_variant	-	-	-	-	-	-	IMPACT=MODIFIER;DISTANCE=2466;STRAND=1;FLAGS=cds_end_NF;SYMBOL=FUT2;SYMBOL_SOURCE=HGNC;HGNC_ID=4013;NEAREST=FUT2
rs692854	19:49209464	A	ENSG00000176920	ENST00000391876	Transcript	downstream_gene_variant	-	-	-	-	-	-	IMPACT=MODIFIER;DISTANCE=555;STRAND=1;SYMBOL=FUT2;SYMBOL_SOURCE=HGNC;HGNC_ID=4013;NEAREST=FUT2
rs692854	19:49209464	A	ENSG00000176920	ENST00000425340	Transcript	downstream_gene_variant	-	-	-	-	-	-	IMPACT=MODIFIER;DISTANCE=257;STRAND=1;SYMBOL=FUT2;SYMBOL_SOURCE=HGNC;HGNC_ID=4013;NEAREST=FUT2
rs692854	19:49209464	A	ENSG00000176920	ENST00000522966	Transcript	downstream_gene_variant	-	-	-	-	-	-	IMPACT=MODIFIER;DISTANCE=2591;STRAND=1;FLAGS=cds_end_NF;SYMBOL=FUT2;SYMBOL_SOURCE=HGNC;HGNC_ID=4013;NEAREST=FUT2
rs1704773	19:49209566	G	ENSG00000176920	ENST00000391876	Transcript	downstream_gene_variant	-	-	-	-	-	-	IMPACT=MODIFIER;DISTANCE=657;STRAND=1;SYMBOL=FUT2;SYMBOL_SOURCE=HGNC;HGNC_ID=4013;NEAREST=FUT2
rs1704773	19:49209566	G	ENSG00000176920	ENST00000425340	Transcript	downstream_gene_variant	-	-	-	-	-	-	IMPACT=MODIFIER;DISTANCE=359;STRAND=1;SYMBOL=FUT2;SYMBOL_SOURCE=HGNC;HGNC_ID=4013;NEAREST=FUT2
rs1704773	19:49209566	G	ENSG00000176920	ENST00000522966	Transcript	downstream_gene_variant	-	-	-	-	-	-	IMPACT=MODIFIER;DISTANCE=2693;STRAND=1;FLAGS=cds_end_NF;SYMBOL=FUT2;SYMBOL_SOURCE=HGNC;HGNC_ID=4013;NEAREST=FUT2
rs646327	19:49209851	G	ENSG00000176920	ENST00000391876	Transcript	downstream_gene_variant	-	-	-	-	-	-	IMPACT=MODIFIER;DISTANCE=942;STRAND=1;SYMBOL=FUT2;SYMBOL_SOURCE=HGNC;HGNC_ID=4013;NEAREST=MAMSTR
rs646327	19:49209851	G	ENSG00000176920	ENST00000425340	Transcript	downstream_gene_variant	-	-	-	-	-	-	IMPACT=MODIFIER;DISTANCE=644;STRAND=1;SYMBOL=FUT2;SYMBOL_SOURCE=HGNC;HGNC_ID=4013;NEAREST=MAMSTR
rs646327	19:49209851	G	ENSG00000176920	ENST00000522966	Transcript	downstream_gene_variant	-	-	-	-	-	-	IMPACT=MODIFIER;DISTANCE=2978;STRAND=1;FLAGS=cds_end_NF;SYMBOL=FUT2;SYMBOL_SOURCE=HGNC;HGNC_ID=4013;NEAREST=MAMSTR
rs676388	19:49211969	C	ENSG00000176909	ENST00000318083	Transcript	downstream_gene_variant	-	-	-	-	-	-	IMPACT=MODIFIER;DISTANCE=4030;STRAND=-1;SYMBOL=MAMSTR;SYMBOL_SOURCE=HGNC;HGNC_ID=26689;NEAREST=MAMSTR
rs676388	19:49211969	C	ENSG00000176909	ENST00000356751	Transcript	downstream_gene_variant	-	-	-	-	-	-	IMPACT=MODIFIER;DISTANCE=4284;STRAND=-1;SYMBOL=MAMSTR;SYMBOL_SOURCE=HGNC;HGNC_ID=26689;NEAREST=MAMSTR
rs676388	19:49211969	C	ENSG00000176909	ENST00000377367	Transcript	downstream_gene_variant	-	-	-	-	-	-	IMPACT=MODIFIER;DISTANCE=4286;STRAND=-1;SYMBOL=MAMSTR;SYMBOL_SOURCE=HGNC;HGNC_ID=26689;NEAREST=MAMSTR
rs676388	19:49211969	C	ENSG00000176920	ENST00000391876	Transcript	downstream_gene_variant	-	-	-	-	-	-	IMPACT=MODIFIER;DISTANCE=3060;STRAND=1;SYMBOL=FUT2;SYMBOL_SOURCE=HGNC;HGNC_ID=4013;NEAREST=MAMSTR
rs676388	19:49211969	C	ENSG00000176909	ENST00000419611	Transcript	downstream_gene_variant	-	-	-	-	-	-	IMPACT=MODIFIER;DISTANCE=4286;STRAND=-1;SYMBOL=MAMSTR;SYMBOL_SOURCE=HGNC;HGNC_ID=26689;NEAREST=MAMSTR
rs676388	19:49211969	C	ENSG00000176920	ENST00000425340	Transcript	downstream_gene_variant	-	-	-	-	-	-	IMPACT=MODIFIER;DISTANCE=2762;STRAND=1;SYMBOL=FUT2;SYMBOL_SOURCE=HGNC;HGNC_ID=4013;NEAREST=MAMSTR
rs676388	19:49211969	C	ENSG00000176909	ENST00000594582	Transcript	downstream_gene_variant	-	-	-	-	-	-	IMPACT=MODIFIER;DISTANCE=4285;STRAND=-1;SYMBOL=MAMSTR;SYMBOL_SOURCE=HGNC;HGNC_ID=26689;NEAREST=MAMSTR
rs584768	19:49213284	A	ENSG00000176909	ENST00000318083	Transcript	downstream_gene_variant	-	-	-	-	-	-	IMPACT=MODIFIER;DISTANCE=2715;STRAND=-1;SYMBOL=MAMSTR;SYMBOL_SOURCE=HGNC;HGNC_ID=26689;NEAREST=MAMSTR
rs584768	19:49213284	A	ENSG00000176909	ENST00000356751	Transcript	downstream_gene_variant	-	-	-	-	-	-	IMPACT=MODIFIER;DISTANCE=2969;STRAND=-1;SYMBOL=MAMSTR;SYMBOL_SOURCE=HGNC;HGNC_ID=26689;NEAREST=MAMSTR
rs584768	19:49213284	A	ENSG00000176909	ENST00000377367	Transcript	downstream_gene_variant	-	-	-	-	-	-	IMPACT=MODIFIER;DISTANCE=2971;STRAND=-1;SYMBOL=MAMSTR;SYMBOL_SOURCE=HGNC;HGNC_ID=26689;NEAREST=MAMSTR
rs584768	19:49213284	A	ENSG00000176920	ENST00000391876	Transcript	downstream_gene_variant	-	-	-	-	-	-	IMPACT=MODIFIER;DISTANCE=4375;STRAND=1;SYMBOL=FUT2;SYMBOL_SOURCE=HGNC;HGNC_ID=4013;NEAREST=MAMSTR
rs584768	19:49213284	A	ENSG00000176909	ENST00000419611	Transcript	downstream_gene_variant	-	-	-	-	-	-	IMPACT=MODIFIER;DISTANCE=2971;STRAND=-1;SYMBOL=MAMSTR;SYMBOL_SOURCE=HGNC;HGNC_ID=26689;NEAREST=MAMSTR
rs584768	19:49213284	A	ENSG00000176920	ENST00000425340	Transcript	downstream_gene_variant	-	-	-	-	-	-	IMPACT=MODIFIER;DISTANCE=4077;STRAND=1;SYMBOL=FUT2;SYMBOL_SOURCE=HGNC;HGNC_ID=4013;NEAREST=MAMSTR
rs584768	19:49213284	A	ENSG00000176909	ENST00000594582	Transcript	downstream_gene_variant	-	-	-	-	-	-	IMPACT=MODIFIER;DISTANCE=2970;STRAND=-1;SYMBOL=MAMSTR;SYMBOL_SOURCE=HGNC;HGNC_ID=26689;NEAREST=MAMSTR
rs584768	19:49213284	A	ENSG00000176909	ENST00000599703	Transcript	downstream_gene_variant	-	-	-	-	-	-	IMPACT=MODIFIER;DISTANCE=4799;STRAND=-1;FLAGS=cds_end_NF;SYMBOL=MAMSTR;SYMBOL_SOURCE=HGNC;HGNC_ID=26689;NEAREST=MAMSTR
rs2452170	19:49213504	A	ENSG00000176909	ENST00000318083	Transcript	downstream_gene_variant	-	-	-	-	-	-	IMPACT=MODIFIER;DISTANCE=2495;STRAND=-1;SYMBOL=MAMSTR;SYMBOL_SOURCE=HGNC;HGNC_ID=26689;NEAREST=MAMSTR
rs2452170	19:49213504	A	ENSG00000176909	ENST00000356751	Transcript	downstream_gene_variant	-	-	-	-	-	-	IMPACT=MODIFIER;DISTANCE=2749;STRAND=-1;SYMBOL=MAMSTR;SYMBOL_SOURCE=HGNC;HGNC_ID=26689;NEAREST=MAMSTR
rs2452170	19:49213504	A	ENSG00000176909	ENST00000377367	Transcript	downstream_gene_variant	-	-	-	-	-	-	IMPACT=MODIFIER;DISTANCE=2751;STRAND=-1;SYMBOL=MAMSTR;SYMBOL_SOURCE=HGNC;HGNC_ID=26689;NEAREST=MAMSTR
rs2452170	19:49213504	A	ENSG00000176920	ENST00000391876	Transcript	downstream_gene_variant	-	-	-	-	-	-	IMPACT=MODIFIER;DISTANCE=4595;STRAND=1;SYMBOL=FUT2;SYMBOL_SOURCE=HGNC;HGNC_ID=4013;NEAREST=MAMSTR
rs2452170	19:49213504	A	ENSG00000176909	ENST00000419611	Transcript	downstream_gene_variant	-	-	-	-	-	-	IMPACT=MODIFIER;DISTANCE=2751;STRAND=-1;SYMBOL=MAMSTR;SYMBOL_SOURCE=HGNC;HGNC_ID=26689;NEAREST=MAMSTR
rs2452170	19:49213504	A	ENSG00000176920	ENST00000425340	Transcript	downstream_gene_variant	-	-	-	-	-	-	IMPACT=MODIFIER;DISTANCE=4297;STRAND=1;SYMBOL=FUT2;SYMBOL_SOURCE=HGNC;HGNC_ID=4013;NEAREST=MAMSTR
rs2452170	19:49213504	A	ENSG00000176909	ENST00000594582	Transcript	downstream_gene_variant	-	-	-	-	-	-	IMPACT=MODIFIER;DISTANCE=2750;STRAND=-1;SYMBOL=MAMSTR;SYMBOL_SOURCE=HGNC;HGNC_ID=26689;NEAREST=MAMSTR
rs2452170	19:49213504	A	ENSG00000176909	ENST00000599703	Transcript	downstream_gene_variant	-	-	-	-	-	-	IMPACT=MODIFIER;DISTANCE=4579;STRAND=-1;FLAGS=cds_end_NF;SYMBOL=MAMSTR;SYMBOL_SOURCE=HGNC;HGNC_ID=26689;NEAREST=MAMSTR
rs2638282	19:49213833	A	ENSG00000176909	ENST00000318083	Transcript	downstream_gene_variant	-	-	-	-	-	-	IMPACT=MODIFIER;DISTANCE=2166;STRAND=-1;SYMBOL=MAMSTR;SYMBOL_SOURCE=HGNC;HGNC_ID=26689;NEAREST=MAMSTR
rs2638282	19:49213833	A	ENSG00000176909	ENST00000356751	Transcript	downstream_gene_variant	-	-	-	-	-	-	IMPACT=MODIFIER;DISTANCE=2420;STRAND=-1;SYMBOL=MAMSTR;SYMBOL_SOURCE=HGNC;HGNC_ID=26689;NEAREST=MAMSTR
rs2638282	19:49213833	A	ENSG00000176909	ENST00000377367	Transcript	downstream_gene_variant	-	-	-	-	-	-	IMPACT=MODIFIER;DISTANCE=2422;STRAND=-1;SYMBOL=MAMSTR;SYMBOL_SOURCE=HGNC;HGNC_ID=26689;NEAREST=MAMSTR
rs2638282	19:49213833	A	ENSG00000176920	ENST00000391876	Transcript	downstream_gene_variant	-	-	-	-	-	-	IMPACT=MODIFIER;DISTANCE=4924;STRAND=1;SYMBOL=FUT2;SYMBOL_SOURCE=HGNC;HGNC_ID=4013;NEAREST=MAMSTR
rs2638282	19:49213833	A	ENSG00000176909	ENST00000419611	Transcript	downstream_gene_variant	-	-	-	-	-	-	IMPACT=MODIFIER;DISTANCE=2422;STRAND=-1;SYMBOL=MAMSTR;SYMBOL_SOURCE=HGNC;HGNC_ID=26689;NEAREST=MAMSTR
rs2638282	19:49213833	A	ENSG00000176920	ENST00000425340	Transcript	downstream_gene_variant	-	-	-	-	-	-	IMPACT=MODIFIER;DISTANCE=4626;STRAND=1;SYMBOL=FUT2;SYMBOL_SOURCE=HGNC;HGNC_ID=4013;NEAREST=MAMSTR
rs2638282	19:49213833	A	ENSG00000176909	ENST00000594582	Transcript	downstream_gene_variant	-	-	-	-	-	-	IMPACT=MODIFIER;DISTANCE=2421;STRAND=-1;SYMBOL=MAMSTR;SYMBOL_SOURCE=HGNC;HGNC_ID=26689;NEAREST=MAMSTR
rs2638282	19:49213833	A	ENSG00000176909	ENST00000595591	Transcript	downstream_gene_variant	-	-	-	-	-	-	IMPACT=MODIFIER;DISTANCE=4768;STRAND=-1;FLAGS=cds_end_NF;SYMBOL=MAMSTR;SYMBOL_SOURCE=HGNC;HGNC_ID=26689;NEAREST=MAMSTR
rs2638282	19:49213833	A	ENSG00000176909	ENST00000599703	Transcript	downstream_gene_variant	-	-	-	-	-	-	IMPACT=MODIFIER;DISTANCE=4250;STRAND=-1;FLAGS=cds_end_NF;SYMBOL=MAMSTR;SYMBOL_SOURCE=HGNC;HGNC_ID=26689;NEAREST=MAMSTR
rs281379	19:49214274	A	ENSG00000176909	ENST00000318083	Transcript	downstream_gene_variant	-	-	-	-	-	-	IMPACT=MODIFIER;DISTANCE=1725;STRAND=-1;SYMBOL=MAMSTR;SYMBOL_SOURCE=HGNC;HGNC_ID=26689;NEAREST=MAMSTR
rs281379	19:49214274	A	ENSG00000176909	ENST00000356751	Transcript	downstream_gene_variant	-	-	-	-	-	-	IMPACT=MODIFIER;DISTANCE=1979;STRAND=-1;SYMBOL=MAMSTR;SYMBOL_SOURCE=HGNC;HGNC_ID=26689;NEAREST=MAMSTR
rs281379	19:49214274	A	ENSG00000176909	ENST00000377367	Transcript	downstream_gene_variant	-	-	-	-	-	-	IMPACT=MODIFIER;DISTANCE=1981;STRAND=-1;SYMBOL=MAMSTR;SYMBOL_SOURCE=HGNC;HGNC_ID=26689;NEAREST=MAMSTR
rs281379	19:49214274	A	ENSG00000176909	ENST00000419611	Transcript	downstream_gene_variant	-	-	-	-	-	-	IMPACT=MODIFIER;DISTANCE=1981;STRAND=-1;SYMBOL=MAMSTR;SYMBOL_SOURCE=HGNC;HGNC_ID=26689;NEAREST=MAMSTR
rs281379	19:49214274	A	ENSG00000176909	ENST00000594582	Transcript	downstream_gene_variant	-	-	-	-	-	-	IMPACT=MODIFIER;DISTANCE=1980;STRAND=-1;SYMBOL=MAMSTR;SYMBOL_SOURCE=HGNC;HGNC_ID=26689;NEAREST=MAMSTR
rs281379	19:49214274	A	ENSG00000176909	ENST00000595591	Transcript	downstream_gene_variant	-	-	-	-	-	-	IMPACT=MODIFIER;DISTANCE=4327;STRAND=-1;FLAGS=cds_end_NF;SYMBOL=MAMSTR;SYMBOL_SOURCE=HGNC;HGNC_ID=26689;NEAREST=MAMSTR
rs281379	19:49214274	A	ENSG00000176909	ENST00000599703	Transcript	downstream_gene_variant	-	-	-	-	-	-	IMPACT=MODIFIER;DISTANCE=3809;STRAND=-1;FLAGS=cds_end_NF;SYMBOL=MAMSTR;SYMBOL_SOURCE=HGNC;HGNC_ID=26689;NEAREST=MAMSTR
rs4002471	19:49215095	T	ENSG00000176909	ENST00000318083	Transcript	downstream_gene_variant	-	-	-	-	-	-	IMPACT=MODIFIER;DISTANCE=904;STRAND=-1;SYMBOL=MAMSTR;SYMBOL_SOURCE=HGNC;HGNC_ID=26689;NEAREST=MAMSTR
rs4002471	19:49215095	T	ENSG00000176909	ENST00000356751	Transcript	downstream_gene_variant	-	-	-	-	-	-	IMPACT=MODIFIER;DISTANCE=1158;STRAND=-1;SYMBOL=MAMSTR;SYMBOL_SOURCE=HGNC;HGNC_ID=26689;NEAREST=MAMSTR
rs4002471	19:49215095	T	ENSG00000176909	ENST00000377367	Transcript	downstream_gene_variant	-	-	-	-	-	-	IMPACT=MODIFIER;DISTANCE=1160;STRAND=-1;SYMBOL=MAMSTR;SYMBOL_SOURCE=HGNC;HGNC_ID=26689;NEAREST=MAMSTR
rs4002471	19:49215095	T	ENSG00000176909	ENST00000419611	Transcript	downstream_gene_variant	-	-	-	-	-	-	IMPACT=MODIFIER;DISTANCE=1160;STRAND=-1;SYMBOL=MAMSTR;SYMBOL_SOURCE=HGNC;HGNC_ID=26689;NEAREST=MAMSTR
rs4002471	19:49215095	T	ENSG00000176909	ENST00000594582	Transcript	downstream_gene_variant	-	-	-	-	-	-	IMPACT=MODIFIER;DISTANCE=1159;STRAND=-1;SYMBOL=MAMSTR;SYMBOL_SOURCE=HGNC;HGNC_ID=26689;NEAREST=MAMSTR
rs4002471	19:49215095	T	ENSG00000176909	ENST00000595591	Transcript	downstream_gene_variant	-	-	-	-	-	-	IMPACT=MODIFIER;DISTANCE=3506;STRAND=-1;FLAGS=cds_end_NF;SYMBOL=MAMSTR;SYMBOL_SOURCE=HGNC;HGNC_ID=26689;NEAREST=MAMSTR
rs4002471	19:49215095	T	ENSG00000176909	ENST00000599703	Transcript	downstream_gene_variant	-	-	-	-	-	-	IMPACT=MODIFIER;DISTANCE=2988;STRAND=-1;FLAGS=cds_end_NF;SYMBOL=MAMSTR;SYMBOL_SOURCE=HGNC;HGNC_ID=26689;NEAREST=MAMSTR
rs35866622	19:49218060	T	ENSG00000176909	ENST00000318083	Transcript	splice_region_variant,intron_variant	-	-	-	-	-	-	IMPACT=LOW;STRAND=-1;SYMBOL=MAMSTR;SYMBOL_SOURCE=HGNC;HGNC_ID=26689;NEAREST=MAMSTR;INTRON=6/9
rs35866622	19:49218060	T	ENSG00000176909	ENST00000356751	Transcript	splice_region_variant,intron_variant	-	-	-	-	-	-	IMPACT=LOW;STRAND=-1;SYMBOL=MAMSTR;SYMBOL_SOURCE=HGNC;HGNC_ID=26689;NEAREST=MAMSTR;INTRON=4/7
rs35866622	19:49218060	T	ENSG00000176909	ENST00000377367	Transcript	splice_region_variant,intron_variant	-	-	-	-	-	-	IMPACT=LOW;STRAND=-1;SYMBOL=MAMSTR;SYMBOL_SOURCE=HGNC;HGNC_ID=26689;NEAREST=MAMSTR;INTRON=6/8
rs35866622	19:49218060	T	ENSG00000176909	ENST00000419611	Transcript	splice_region_variant,intron_variant	-	-	-	-	-	-	IMPACT=LOW;STRAND=-1;SYMBOL=MAMSTR;SYMBOL_SOURCE=HGNC;HGNC_ID=26689;NEAREST=MAMSTR;INTRON=6/9
rs35866622	19:49218060	T	ENSG00000176909	ENST00000594582	Transcript	splice_region_variant,intron_variant	-	-	-	-	-	-	IMPACT=LOW;STRAND=-1;SYMBOL=MAMSTR;SYMBOL_SOURCE=HGNC;HGNC_ID=26689;NEAREST=MAMSTR;INTRON=4/6
rs35866622	19:49218060	T	ENSG00000176909	ENST00000595591	Transcript	downstream_gene_variant	-	-	-	-	-	-	IMPACT=MODIFIER;DISTANCE=541;STRAND=-1;FLAGS=cds_end_NF;SYMBOL=MAMSTR;SYMBOL_SOURCE=HGNC;HGNC_ID=26689;NEAREST=MAMSTR
rs35866622	19:49218060	T	ENSG00000176909	ENST00000599703	Transcript	downstream_gene_variant	-	-	-	-	-	-	IMPACT=MODIFIER;DISTANCE=23;STRAND=-1;FLAGS=cds_end_NF;SYMBOL=MAMSTR;SYMBOL_SOURCE=HGNC;HGNC_ID=26689;NEAREST=MAMSTR
rs33988101	19:49218111	T	ENSG00000176909	ENST00000318083	Transcript	synonymous_variant	544	480	160	P	ccC/ccA	-	IMPACT=LOW;STRAND=-1;SYMBOL=MAMSTR;SYMBOL_SOURCE=HGNC;HGNC_ID=26689;NEAREST=MAMSTR;EXON=6/10
rs33988101	19:49218111	T	ENSG00000176909	ENST00000356751	Transcript	synonymous_variant	786	171	57	P	ccC/ccA	-	IMPACT=LOW;STRAND=-1;SYMBOL=MAMSTR;SYMBOL_SOURCE=HGNC;HGNC_ID=26689;NEAREST=MAMSTR;EXON=4/8
rs33988101	19:49218111	T	ENSG00000176909	ENST00000377367	Transcript	synonymous_variant	544	171	57	P	ccC/ccA	-	IMPACT=LOW;STRAND=-1;SYMBOL=MAMSTR;SYMBOL_SOURCE=HGNC;HGNC_ID=26689;NEAREST=MAMSTR;EXON=6/9
rs33988101	19:49218111	T	ENSG00000176909	ENST00000419611	Transcript	synonymous_variant	544	171	57	P	ccC/ccA	-	IMPACT=LOW;STRAND=-1;SYMBOL=MAMSTR;SYMBOL_SOURCE=HGNC;HGNC_ID=26689;NEAREST=MAMSTR;EXON=6/10
rs33988101	19:49218111	T	ENSG00000176909	ENST00000594582	Transcript	synonymous_variant	850	171	57	P	ccC/ccA	-	IMPACT=LOW;STRAND=-1;SYMBOL=MAMSTR;SYMBOL_SOURCE=HGNC;HGNC_ID=26689;NEAREST=MAMSTR;EXON=4/7
rs33988101	19:49218111	T	ENSG00000176909	ENST00000595591	Transcript	downstream_gene_variant	-	-	-	-	-	-	IMPACT=MODIFIER;DISTANCE=490;STRAND=-1;FLAGS=cds_end_NF;SYMBOL=MAMSTR;SYMBOL_SOURCE=HGNC;HGNC_ID=26689;NEAREST=MAMSTR
rs33988101	19:49218111	T	ENSG00000176909	ENST00000599703	Transcript	synonymous_variant	686	630	210	P	ccC/ccA	-	IMPACT=LOW;STRAND=-1;FLAGS=cds_end_NF;SYMBOL=MAMSTR;SYMBOL_SOURCE=HGNC;HGNC_ID=26689;NEAREST=MAMSTR;EXON=6/6
rs12978750	19:49218430	G	ENSG00000176909	ENST00000318083	Transcript	intron_variant	-	-	-	-	-	-	IMPACT=MODIFIER;STRAND=-1;SYMBOL=MAMSTR;SYMBOL_SOURCE=HGNC;HGNC_ID=26689;NEAREST=MAMSTR;INTRON=5/9
rs12978750	19:49218430	G	ENSG00000176909	ENST00000356751	Transcript	intron_variant	-	-	-	-	-	-	IMPACT=MODIFIER;STRAND=-1;SYMBOL=MAMSTR;SYMBOL_SOURCE=HGNC;HGNC_ID=26689;NEAREST=MAMSTR;INTRON=3/7
rs12978750	19:49218430	G	ENSG00000176909	ENST00000377367	Transcript	intron_variant	-	-	-	-	-	-	IMPACT=MODIFIER;STRAND=-1;SYMBOL=MAMSTR;SYMBOL_SOURCE=HGNC;HGNC_ID=26689;NEAREST=MAMSTR;INTRON=5/8
rs12978750	19:49218430	G	ENSG00000176909	ENST00000419611	Transcript	intron_variant	-	-	-	-	-	-	IMPACT=MODIFIER;STRAND=-1;SYMBOL=MAMSTR;SYMBOL_SOURCE=HGNC;HGNC_ID=26689;NEAREST=MAMSTR;INTRON=5/9
rs12978750	19:49218430	G	ENSG00000176909	ENST00000594582	Transcript	intron_variant	-	-	-	-	-	-	IMPACT=MODIFIER;STRAND=-1;SYMBOL=MAMSTR;SYMBOL_SOURCE=HGNC;HGNC_ID=26689;NEAREST=MAMSTR;INTRON=3/6
rs12978750	19:49218430	G	ENSG00000176909	ENST00000595591	Transcript	downstream_gene_variant	-	-	-	-	-	-	IMPACT=MODIFIER;DISTANCE=171;STRAND=-1;FLAGS=cds_end_NF;SYMBOL=MAMSTR;SYMBOL_SOURCE=HGNC;HGNC_ID=26689;NEAREST=MAMSTR
rs12978750	19:49218430	G	ENSG00000176909	ENST00000599703	Transcript	intron_variant	-	-	-	-	-	-	IMPACT=MODIFIER;STRAND=-1;FLAGS=cds_end_NF;SYMBOL=MAMSTR;SYMBOL_SOURCE=HGNC;HGNC_ID=26689;NEAREST=MAMSTR;INTRON=5/5
rs12978752	19:49218437	C	ENSG00000176909	ENST00000318083	Transcript	intron_variant	-	-	-	-	-	-	IMPACT=MODIFIER;STRAND=-1;SYMBOL=MAMSTR;SYMBOL_SOURCE=HGNC;HGNC_ID=26689;NEAREST=MAMSTR;INTRON=5/9
rs12978752	19:49218437	C	ENSG00000176909	ENST00000356751	Transcript	intron_variant	-	-	-	-	-	-	IMPACT=MODIFIER;STRAND=-1;SYMBOL=MAMSTR;SYMBOL_SOURCE=HGNC;HGNC_ID=26689;NEAREST=MAMSTR;INTRON=3/7
rs12978752	19:49218437	C	ENSG00000176909	ENST00000377367	Transcript	intron_variant	-	-	-	-	-	-	IMPACT=MODIFIER;STRAND=-1;SYMBOL=MAMSTR;SYMBOL_SOURCE=HGNC;HGNC_ID=26689;NEAREST=MAMSTR;INTRON=5/8
rs12978752	19:49218437	C	ENSG00000176909	ENST00000419611	Transcript	intron_variant	-	-	-	-	-	-	IMPACT=MODIFIER;STRAND=-1;SYMBOL=MAMSTR;SYMBOL_SOURCE=HGNC;HGNC_ID=26689;NEAREST=MAMSTR;INTRON=5/9
rs12978752	19:49218437	C	ENSG00000176909	ENST00000594582	Transcript	intron_variant	-	-	-	-	-	-	IMPACT=MODIFIER;STRAND=-1;SYMBOL=MAMSTR;SYMBOL_SOURCE=HGNC;HGNC_ID=26689;NEAREST=MAMSTR;INTRON=3/6
rs12978752	19:49218437	C	ENSG00000176909	ENST00000595591	Transcript	downstream_gene_variant	-	-	-	-	-	-	IMPACT=MODIFIER;DISTANCE=164;STRAND=-1;FLAGS=cds_end_NF;SYMBOL=MAMSTR;SYMBOL_SOURCE=HGNC;HGNC_ID=26689;NEAREST=MAMSTR
rs12978752	19:49218437	C	ENSG00000176909	ENST00000599703	Transcript	intron_variant	-	-	-	-	-	-	IMPACT=MODIFIER;STRAND=-1;FLAGS=cds_end_NF;SYMBOL=MAMSTR;SYMBOL_SOURCE=HGNC;HGNC_ID=26689;NEAREST=MAMSTR;INTRON=5/5
rs12979278	19:49218602	T	ENSG00000176909	ENST00000318083	Transcript	synonymous_variant	406	342	114	A	gcG/gcA	-	IMPACT=LOW;STRAND=-1;SYMBOL=MAMSTR;SYMBOL_SOURCE=HGNC;HGNC_ID=26689;NEAREST=MAMSTR;EXON=5/10
rs12979278	19:49218602	T	ENSG00000176909	ENST00000356751	Transcript	synonymous_variant	648	33	11	A	gcG/gcA	-	IMPACT=LOW;STRAND=-1;SYMBOL=MAMSTR;SYMBOL_SOURCE=HGNC;HGNC_ID=26689;NEAREST=MAMSTR;EXON=3/8
rs12979278	19:49218602	T	ENSG00000176909	ENST00000377367	Transcript	synonymous_variant	406	33	11	A	gcG/gcA	-	IMPACT=LOW;STRAND=-1;SYMBOL=MAMSTR;SYMBOL_SOURCE=HGNC;HGNC_ID=26689;NEAREST=MAMSTR;EXON=5/9
rs12979278	19:49218602	T	ENSG00000176909	ENST00000419611	Transcript	synonymous_variant	406	33	11	A	gcG/gcA	-	IMPACT=LOW;STRAND=-1;SYMBOL=MAMSTR;SYMBOL_SOURCE=HGNC;HGNC_ID=26689;NEAREST=MAMSTR;EXON=5/10
rs12979278	19:49218602	T	ENSG00000176909	ENST00000594582	Transcript	synonymous_variant	712	33	11	A	gcG/gcA	-	IMPACT=LOW;STRAND=-1;SYMBOL=MAMSTR;SYMBOL_SOURCE=HGNC;HGNC_ID=26689;NEAREST=MAMSTR;EXON=3/7
rs12979278	19:49218602	T	ENSG00000176909	ENST00000595591	Transcript	synonymous_variant	414	33	11	A	gcG/gcA	-	IMPACT=LOW;STRAND=-1;FLAGS=cds_end_NF;SYMBOL=MAMSTR;SYMBOL_SOURCE=HGNC;HGNC_ID=26689;NEAREST=MAMSTR;EXON=3/3
rs12979278	19:49218602	T	ENSG00000176909	ENST00000599703	Transcript	synonymous_variant	548	492	164	A	gcG/gcA	-	IMPACT=LOW;STRAND=-1;FLAGS=cds_end_NF;SYMBOL=MAMSTR;SYMBOL_SOURCE=HGNC;HGNC_ID=26689;NEAREST=MAMSTR;EXON=5/6
rs660745	19:49219459	C	ENSG00000105538	ENST00000222145	Transcript	downstream_gene_variant	-	-	-	-	-	-	IMPACT=MODIFIER;DISTANCE=4385;STRAND=-1;SYMBOL=RASIP1;SYMBOL_SOURCE=HGNC;HGNC_ID=24716;NEAREST=MAMSTR
rs660745	19:49219459	C	ENSG00000176909	ENST00000318083	Transcript	intron_variant	-	-	-	-	-	-	IMPACT=MODIFIER;STRAND=-1;SYMBOL=MAMSTR;SYMBOL_SOURCE=HGNC;HGNC_ID=26689;NEAREST=MAMSTR;INTRON=3/9
rs660745	19:49219459	C	ENSG00000176909	ENST00000356751	Transcript	intron_variant	-	-	-	-	-	-	IMPACT=MODIFIER;STRAND=-1;SYMBOL=MAMSTR;SYMBOL_SOURCE=HGNC;HGNC_ID=26689;NEAREST=MAMSTR;INTRON=1/7
rs660745	19:49219459	C	ENSG00000176909	ENST00000377367	Transcript	intron_variant	-	-	-	-	-	-	IMPACT=MODIFIER;STRAND=-1;SYMBOL=MAMSTR;SYMBOL_SOURCE=HGNC;HGNC_ID=26689;NEAREST=MAMSTR;INTRON=3/8
rs660745	19:49219459	C	ENSG00000176909	ENST00000419611	Transcript	intron_variant	-	-	-	-	-	-	IMPACT=MODIFIER;STRAND=-1;SYMBOL=MAMSTR;SYMBOL_SOURCE=HGNC;HGNC_ID=26689;NEAREST=MAMSTR;INTRON=3/9
rs660745	19:49219459	C	ENSG00000176909	ENST00000594582	Transcript	intron_variant	-	-	-	-	-	-	IMPACT=MODIFIER;STRAND=-1;SYMBOL=MAMSTR;SYMBOL_SOURCE=HGNC;HGNC_ID=26689;NEAREST=MAMSTR;INTRON=1/6
rs660745	19:49219459	C	ENSG00000176909	ENST00000595591	Transcript	intron_variant	-	-	-	-	-	-	IMPACT=MODIFIER;STRAND=-1;FLAGS=cds_end_NF;SYMBOL=MAMSTR;SYMBOL_SOURCE=HGNC;HGNC_ID=26689;NEAREST=MAMSTR;INTRON=1/2
rs660745	19:49219459	C	ENSG00000176909	ENST00000599703	Transcript	intron_variant	-	-	-	-	-	-	IMPACT=MODIFIER;STRAND=-1;FLAGS=cds_end_NF;SYMBOL=MAMSTR;SYMBOL_SOURCE=HGNC;HGNC_ID=26689;NEAREST=MAMSTR;INTRON=3/5
rs660745	19:49219459	C	ENSG00000105538	ENST00000601530	Transcript	downstream_gene_variant	-	-	-	-	-	-	IMPACT=MODIFIER;DISTANCE=4385;STRAND=-1;SYMBOL=RASIP1;SYMBOL_SOURCE=HGNC;HGNC_ID=24716;NEAREST=MAMSTR
rs11672900	19:49220323	G	ENSG00000105538	ENST00000222145	Transcript	downstream_gene_variant	-	-	-	-	-	-	IMPACT=MODIFIER;DISTANCE=3521;STRAND=-1;SYMBOL=RASIP1;SYMBOL_SOURCE=HGNC;HGNC_ID=24716;NEAREST=MAMSTR
rs11672900	19:49220323	G	ENSG00000176909	ENST00000318083	Transcript	intron_variant	-	-	-	-	-	-	IMPACT=MODIFIER;STRAND=-1;SYMBOL=MAMSTR;SYMBOL_SOURCE=HGNC;HGNC_ID=26689;NEAREST=MAMSTR;INTRON=2/9
rs11672900	19:49220323	G	ENSG00000176909	ENST00000356751	Transcript	upstream_gene_variant	-	-	-	-	-	-	IMPACT=MODIFIER;DISTANCE=109;STRAND=-1;SYMBOL=MAMSTR;SYMBOL_SOURCE=HGNC;HGNC_ID=26689;NEAREST=MAMSTR
rs11672900	19:49220323	G	ENSG00000176909	ENST00000377367	Transcript	intron_variant	-	-	-	-	-	-	IMPACT=MODIFIER;STRAND=-1;SYMBOL=MAMSTR;SYMBOL_SOURCE=HGNC;HGNC_ID=26689;NEAREST=MAMSTR;INTRON=2/8
rs11672900	19:49220323	G	ENSG00000176909	ENST00000419611	Transcript	intron_variant	-	-	-	-	-	-	IMPACT=MODIFIER;STRAND=-1;SYMBOL=MAMSTR;SYMBOL_SOURCE=HGNC;HGNC_ID=26689;NEAREST=MAMSTR;INTRON=2/9
rs11672900	19:49220323	G	ENSG00000176909	ENST00000594582	Transcript	upstream_gene_variant	-	-	-	-	-	-	IMPACT=MODIFIER;DISTANCE=45;STRAND=-1;SYMBOL=MAMSTR;SYMBOL_SOURCE=HGNC;HGNC_ID=26689;NEAREST=MAMSTR
rs11672900	19:49220323	G	ENSG00000176909	ENST00000595591	Transcript	upstream_gene_variant	-	-	-	-	-	-	IMPACT=MODIFIER;DISTANCE=223;STRAND=-1;FLAGS=cds_end_NF;SYMBOL=MAMSTR;SYMBOL_SOURCE=HGNC;HGNC_ID=26689;NEAREST=MAMSTR
rs11672900	19:49220323	G	ENSG00000176909	ENST00000599703	Transcript	intron_variant	-	-	-	-	-	-	IMPACT=MODIFIER;STRAND=-1;FLAGS=cds_end_NF;SYMBOL=MAMSTR;SYMBOL_SOURCE=HGNC;HGNC_ID=26689;NEAREST=MAMSTR;INTRON=2/5
rs11672900	19:49220323	G	ENSG00000105538	ENST00000601530	Transcript	downstream_gene_variant	-	-	-	-	-	-	IMPACT=MODIFIER;DISTANCE=3521;STRAND=-1;SYMBOL=RASIP1;SYMBOL_SOURCE=HGNC;HGNC_ID=24716;NEAREST=MAMSTR
rs546308	19:49223570	A	ENSG00000105538	ENST00000222145	Transcript	downstream_gene_variant	-	-	-	-	-	-	IMPACT=MODIFIER;DISTANCE=274;STRAND=-1;SYMBOL=RASIP1;SYMBOL_SOURCE=HGNC;HGNC_ID=24716;NEAREST=MAMSTR
rs546308	19:49223570	A	ENSG00000176909	ENST00000318083	Transcript	upstream_gene_variant	-	-	-	-	-	-	IMPACT=MODIFIER;DISTANCE=592;STRAND=-1;SYMBOL=MAMSTR;SYMBOL_SOURCE=HGNC;HGNC_ID=26689;NEAREST=MAMSTR
rs546308	19:49223570	A	ENSG00000176909	ENST00000356751	Transcript	upstream_gene_variant	-	-	-	-	-	-	IMPACT=MODIFIER;DISTANCE=3356;STRAND=-1;SYMBOL=MAMSTR;SYMBOL_SOURCE=HGNC;HGNC_ID=26689;NEAREST=MAMSTR
rs546308	19:49223570	A	ENSG00000176909	ENST00000377367	Transcript	upstream_gene_variant	-	-	-	-	-	-	IMPACT=MODIFIER;DISTANCE=592;STRAND=-1;SYMBOL=MAMSTR;SYMBOL_SOURCE=HGNC;HGNC_ID=26689;NEAREST=MAMSTR
rs546308	19:49223570	A	ENSG00000176909	ENST00000419611	Transcript	upstream_gene_variant	-	-	-	-	-	-	IMPACT=MODIFIER;DISTANCE=592;STRAND=-1;SYMBOL=MAMSTR;SYMBOL_SOURCE=HGNC;HGNC_ID=26689;NEAREST=MAMSTR
rs546308	19:49223570	A	ENSG00000176909	ENST00000594582	Transcript	upstream_gene_variant	-	-	-	-	-	-	IMPACT=MODIFIER;DISTANCE=3292;STRAND=-1;SYMBOL=MAMSTR;SYMBOL_SOURCE=HGNC;HGNC_ID=26689;NEAREST=MAMSTR
rs546308	19:49223570	A	ENSG00000176909	ENST00000595591	Transcript	upstream_gene_variant	-	-	-	-	-	-	IMPACT=MODIFIER;DISTANCE=3470;STRAND=-1;FLAGS=cds_end_NF;SYMBOL=MAMSTR;SYMBOL_SOURCE=HGNC;HGNC_ID=26689;NEAREST=MAMSTR
rs546308	19:49223570	A	ENSG00000105538	ENST00000599291	Transcript	downstream_gene_variant	-	-	-	-	-	-	IMPACT=MODIFIER;DISTANCE=4517;STRAND=-1;FLAGS=cds_start_NF,cds_end_NF;SYMBOL=RASIP1;SYMBOL_SOURCE=HGNC;HGNC_ID=24716;NEAREST=MAMSTR
rs546308	19:49223570	A	ENSG00000176909	ENST00000599703	Transcript	upstream_gene_variant	-	-	-	-	-	-	IMPACT=MODIFIER;DISTANCE=600;STRAND=-1;FLAGS=cds_end_NF;SYMBOL=MAMSTR;SYMBOL_SOURCE=HGNC;HGNC_ID=26689;NEAREST=MAMSTR
rs546308	19:49223570	A	ENSG00000105538	ENST00000601530	Transcript	downstream_gene_variant	-	-	-	-	-	-	IMPACT=MODIFIER;DISTANCE=274;STRAND=-1;SYMBOL=RASIP1;SYMBOL_SOURCE=HGNC;HGNC_ID=24716;NEAREST=MAMSTR
rs629504	19:49223633	G	ENSG00000105538	ENST00000222145	Transcript	downstream_gene_variant	-	-	-	-	-	-	IMPACT=MODIFIER;DISTANCE=211;STRAND=-1;SYMBOL=RASIP1;SYMBOL_SOURCE=HGNC;HGNC_ID=24716;NEAREST=MAMSTR
rs629504	19:49223633	G	ENSG00000176909	ENST00000318083	Transcript	upstream_gene_variant	-	-	-	-	-	-	IMPACT=MODIFIER;DISTANCE=655;STRAND=-1;SYMBOL=MAMSTR;SYMBOL_SOURCE=HGNC;HGNC_ID=26689;NEAREST=MAMSTR
rs629504	19:49223633	G	ENSG00000176909	ENST00000356751	Transcript	upstream_gene_variant	-	-	-	-	-	-	IMPACT=MODIFIER;DISTANCE=3419;STRAND=-1;SYMBOL=MAMSTR;SYMBOL_SOURCE=HGNC;HGNC_ID=26689;NEAREST=MAMSTR
rs629504	19:49223633	G	ENSG00000176909	ENST00000377367	Transcript	upstream_gene_variant	-	-	-	-	-	-	IMPACT=MODIFIER;DISTANCE=655;STRAND=-1;SYMBOL=MAMSTR;SYMBOL_SOURCE=HGNC;HGNC_ID=26689;NEAREST=MAMSTR
rs629504	19:49223633	G	ENSG00000176909	ENST00000419611	Transcript	upstream_gene_variant	-	-	-	-	-	-	IMPACT=MODIFIER;DISTANCE=655;STRAND=-1;SYMBOL=MAMSTR;SYMBOL_SOURCE=HGNC;HGNC_ID=26689;NEAREST=MAMSTR
rs629504	19:49223633	G	ENSG00000176909	ENST00000594582	Transcript	upstream_gene_variant	-	-	-	-	-	-	IMPACT=MODIFIER;DISTANCE=3355;STRAND=-1;SYMBOL=MAMSTR;SYMBOL_SOURCE=HGNC;HGNC_ID=26689;NEAREST=MAMSTR
rs629504	19:49223633	G	ENSG00000176909	ENST00000595591	Transcript	upstream_gene_variant	-	-	-	-	-	-	IMPACT=MODIFIER;DISTANCE=3533;STRAND=-1;FLAGS=cds_end_NF;SYMBOL=MAMSTR;SYMBOL_SOURCE=HGNC;HGNC_ID=26689;NEAREST=MAMSTR
rs629504	19:49223633	G	ENSG00000105538	ENST00000599291	Transcript	downstream_gene_variant	-	-	-	-	-	-	IMPACT=MODIFIER;DISTANCE=4454;STRAND=-1;FLAGS=cds_start_NF,cds_end_NF;SYMBOL=RASIP1;SYMBOL_SOURCE=HGNC;HGNC_ID=24716;NEAREST=MAMSTR
rs629504	19:49223633	G	ENSG00000176909	ENST00000599703	Transcript	upstream_gene_variant	-	-	-	-	-	-	IMPACT=MODIFIER;DISTANCE=663;STRAND=-1;FLAGS=cds_end_NF;SYMBOL=MAMSTR;SYMBOL_SOURCE=HGNC;HGNC_ID=26689;NEAREST=MAMSTR
rs629504	19:49223633	G	ENSG00000105538	ENST00000601530	Transcript	downstream_gene_variant	-	-	-	-	-	-	IMPACT=MODIFIER;DISTANCE=211;STRAND=-1;SYMBOL=RASIP1;SYMBOL_SOURCE=HGNC;HGNC_ID=24716;NEAREST=MAMSTR
rs3859439	19:49224389	C	ENSG00000105538	ENST00000222145	Transcript	intron_variant	-	-	-	-	-	-	IMPACT=MODIFIER;STRAND=-1;SYMBOL=RASIP1;SYMBOL_SOURCE=HGNC;HGNC_ID=24716;NEAREST=MAMSTR;INTRON=11/11
rs3859439	19:49224389	C	ENSG00000176909	ENST00000318083	Transcript	upstream_gene_variant	-	-	-	-	-	-	IMPACT=MODIFIER;DISTANCE=1411;STRAND=-1;SYMBOL=MAMSTR;SYMBOL_SOURCE=HGNC;HGNC_ID=26689;NEAREST=MAMSTR
rs3859439	19:49224389	C	ENSG00000176909	ENST00000356751	Transcript	upstream_gene_variant	-	-	-	-	-	-	IMPACT=MODIFIER;DISTANCE=4175;STRAND=-1;SYMBOL=MAMSTR;SYMBOL_SOURCE=HGNC;HGNC_ID=26689;NEAREST=MAMSTR
rs3859439	19:49224389	C	ENSG00000176909	ENST00000377367	Transcript	upstream_gene_variant	-	-	-	-	-	-	IMPACT=MODIFIER;DISTANCE=1411;STRAND=-1;SYMBOL=MAMSTR;SYMBOL_SOURCE=HGNC;HGNC_ID=26689;NEAREST=MAMSTR
rs3859439	19:49224389	C	ENSG00000176909	ENST00000419611	Transcript	upstream_gene_variant	-	-	-	-	-	-	IMPACT=MODIFIER;DISTANCE=1411;STRAND=-1;SYMBOL=MAMSTR;SYMBOL_SOURCE=HGNC;HGNC_ID=26689;NEAREST=MAMSTR
rs3859439	19:49224389	C	ENSG00000176909	ENST00000594582	Transcript	upstream_gene_variant	-	-	-	-	-	-	IMPACT=MODIFIER;DISTANCE=4111;STRAND=-1;SYMBOL=MAMSTR;SYMBOL_SOURCE=HGNC;HGNC_ID=26689;NEAREST=MAMSTR
rs3859439	19:49224389	C	ENSG00000176909	ENST00000595591	Transcript	upstream_gene_variant	-	-	-	-	-	-	IMPACT=MODIFIER;DISTANCE=4289;STRAND=-1;FLAGS=cds_end_NF;SYMBOL=MAMSTR;SYMBOL_SOURCE=HGNC;HGNC_ID=26689;NEAREST=MAMSTR
rs3859439	19:49224389	C	ENSG00000105538	ENST00000599291	Transcript	downstream_gene_variant	-	-	-	-	-	-	IMPACT=MODIFIER;DISTANCE=3698;STRAND=-1;FLAGS=cds_start_NF,cds_end_NF;SYMBOL=RASIP1;SYMBOL_SOURCE=HGNC;HGNC_ID=24716;NEAREST=MAMSTR
rs3859439	19:49224389	C	ENSG00000176909	ENST00000599703	Transcript	upstream_gene_variant	-	-	-	-	-	-	IMPACT=MODIFIER;DISTANCE=1419;STRAND=-1;FLAGS=cds_end_NF;SYMBOL=MAMSTR;SYMBOL_SOURCE=HGNC;HGNC_ID=26689;NEAREST=MAMSTR
rs3859439	19:49224389	C	ENSG00000105538	ENST00000601530	Transcript	intron_variant,non_coding_transcript_variant	-	-	-	-	-	-	IMPACT=MODIFIER;STRAND=-1;SYMBOL=RASIP1;SYMBOL_SOURCE=HGNC;HGNC_ID=24716;NEAREST=MAMSTR;INTRON=3/3
rs3859439	19:49224389	C	-	ENSR00000110761	RegulatoryFeature	regulatory_region_variant	-	-	-	-	-	-	IMPACT=MODIFIER;NEAREST=MAMSTR;BIOTYPE=promoter
rs519757	19:49224966	C	ENSG00000105538	ENST00000222145	Transcript	intron_variant	-	-	-	-	-	-	IMPACT=MODIFIER;STRAND=-1;SYMBOL=RASIP1;SYMBOL_SOURCE=HGNC;HGNC_ID=24716;NEAREST=MAMSTR;INTRON=11/11
rs519757	19:49224966	C	ENSG00000176909	ENST00000318083	Transcript	upstream_gene_variant	-	-	-	-	-	-	IMPACT=MODIFIER;DISTANCE=1988;STRAND=-1;SYMBOL=MAMSTR;SYMBOL_SOURCE=HGNC;HGNC_ID=26689;NEAREST=MAMSTR
rs519757	19:49224966	C	ENSG00000176909	ENST00000356751	Transcript	upstream_gene_variant	-	-	-	-	-	-	IMPACT=MODIFIER;DISTANCE=4752;STRAND=-1;SYMBOL=MAMSTR;SYMBOL_SOURCE=HGNC;HGNC_ID=26689;NEAREST=MAMSTR
rs519757	19:49224966	C	ENSG00000176909	ENST00000377367	Transcript	upstream_gene_variant	-	-	-	-	-	-	IMPACT=MODIFIER;DISTANCE=1988;STRAND=-1;SYMBOL=MAMSTR;SYMBOL_SOURCE=HGNC;HGNC_ID=26689;NEAREST=MAMSTR
rs519757	19:49224966	C	ENSG00000176909	ENST00000419611	Transcript	upstream_gene_variant	-	-	-	-	-	-	IMPACT=MODIFIER;DISTANCE=1988;STRAND=-1;SYMBOL=MAMSTR;SYMBOL_SOURCE=HGNC;HGNC_ID=26689;NEAREST=MAMSTR
rs519757	19:49224966	C	ENSG00000176909	ENST00000594582	Transcript	upstream_gene_variant	-	-	-	-	-	-	IMPACT=MODIFIER;DISTANCE=4688;STRAND=-1;SYMBOL=MAMSTR;SYMBOL_SOURCE=HGNC;HGNC_ID=26689;NEAREST=MAMSTR
rs519757	19:49224966	C	ENSG00000176909	ENST00000595591	Transcript	upstream_gene_variant	-	-	-	-	-	-	IMPACT=MODIFIER;DISTANCE=4866;STRAND=-1;FLAGS=cds_end_NF;SYMBOL=MAMSTR;SYMBOL_SOURCE=HGNC;HGNC_ID=26689;NEAREST=MAMSTR
rs519757	19:49224966	C	ENSG00000105538	ENST00000599291	Transcript	downstream_gene_variant	-	-	-	-	-	-	IMPACT=MODIFIER;DISTANCE=3121;STRAND=-1;FLAGS=cds_start_NF,cds_end_NF;SYMBOL=RASIP1;SYMBOL_SOURCE=HGNC;HGNC_ID=24716;NEAREST=MAMSTR
rs519757	19:49224966	C	ENSG00000176909	ENST00000599703	Transcript	upstream_gene_variant	-	-	-	-	-	-	IMPACT=MODIFIER;DISTANCE=1996;STRAND=-1;FLAGS=cds_end_NF;SYMBOL=MAMSTR;SYMBOL_SOURCE=HGNC;HGNC_ID=26689;NEAREST=MAMSTR
rs519757	19:49224966	C	ENSG00000105538	ENST00000601530	Transcript	intron_variant,non_coding_transcript_variant	-	-	-	-	-	-	IMPACT=MODIFIER;STRAND=-1;SYMBOL=RASIP1;SYMBOL_SOURCE=HGNC;HGNC_ID=24716;NEAREST=MAMSTR;INTRON=3/3
rs11882796	19:49225766	T	ENSG00000105538	ENST00000222145	Transcript	intron_variant	-	-	-	-	-	-	IMPACT=MODIFIER;STRAND=-1;SYMBOL=RASIP1;SYMBOL_SOURCE=HGNC;HGNC_ID=24716;NEAREST=MAMSTR;INTRON=10/11
rs11882796	19:49225766	T	ENSG00000176909	ENST00000318083	Transcript	upstream_gene_variant	-	-	-	-	-	-	IMPACT=MODIFIER;DISTANCE=2788;STRAND=-1;SYMBOL=MAMSTR;SYMBOL_SOURCE=HGNC;HGNC_ID=26689;NEAREST=MAMSTR
rs11882796	19:49225766	T	ENSG00000176909	ENST00000377367	Transcript	upstream_gene_variant	-	-	-	-	-	-	IMPACT=MODIFIER;DISTANCE=2788;STRAND=-1;SYMBOL=MAMSTR;SYMBOL_SOURCE=HGNC;HGNC_ID=26689;NEAREST=MAMSTR
rs11882796	19:49225766	T	ENSG00000176909	ENST00000419611	Transcript	upstream_gene_variant	-	-	-	-	-	-	IMPACT=MODIFIER;DISTANCE=2788;STRAND=-1;SYMBOL=MAMSTR;SYMBOL_SOURCE=HGNC;HGNC_ID=26689;NEAREST=MAMSTR
rs11882796	19:49225766	T	ENSG00000105538	ENST00000599291	Transcript	downstream_gene_variant	-	-	-	-	-	-	IMPACT=MODIFIER;DISTANCE=2321;STRAND=-1;FLAGS=cds_start_NF,cds_end_NF;SYMBOL=RASIP1;SYMBOL_SOURCE=HGNC;HGNC_ID=24716;NEAREST=MAMSTR
rs11882796	19:49225766	T	ENSG00000176909	ENST00000599703	Transcript	upstream_gene_variant	-	-	-	-	-	-	IMPACT=MODIFIER;DISTANCE=2796;STRAND=-1;FLAGS=cds_end_NF;SYMBOL=MAMSTR;SYMBOL_SOURCE=HGNC;HGNC_ID=26689;NEAREST=MAMSTR
rs11882796	19:49225766	T	ENSG00000105538	ENST00000601530	Transcript	intron_variant,non_coding_transcript_variant	-	-	-	-	-	-	IMPACT=MODIFIER;STRAND=-1;SYMBOL=RASIP1;SYMBOL_SOURCE=HGNC;HGNC_ID=24716;NEAREST=MAMSTR;INTRON=2/3
rs11666792	19:49227043	A	ENSG00000105538	ENST00000222145	Transcript	intron_variant	-	-	-	-	-	-	IMPACT=MODIFIER;STRAND=-1;SYMBOL=RASIP1;SYMBOL_SOURCE=HGNC;HGNC_ID=24716;NEAREST=MAMSTR;INTRON=10/11
rs11666792	19:49227043	A	ENSG00000176909	ENST00000318083	Transcript	upstream_gene_variant	-	-	-	-	-	-	IMPACT=MODIFIER;DISTANCE=4065;STRAND=-1;SYMBOL=MAMSTR;SYMBOL_SOURCE=HGNC;HGNC_ID=26689;NEAREST=MAMSTR
rs11666792	19:49227043	A	ENSG00000176909	ENST00000377367	Transcript	upstream_gene_variant	-	-	-	-	-	-	IMPACT=MODIFIER;DISTANCE=4065;STRAND=-1;SYMBOL=MAMSTR;SYMBOL_SOURCE=HGNC;HGNC_ID=26689;NEAREST=MAMSTR
rs11666792	19:49227043	A	ENSG00000176909	ENST00000419611	Transcript	upstream_gene_variant	-	-	-	-	-	-	IMPACT=MODIFIER;DISTANCE=4065;STRAND=-1;SYMBOL=MAMSTR;SYMBOL_SOURCE=HGNC;HGNC_ID=26689;NEAREST=MAMSTR
rs11666792	19:49227043	A	ENSG00000105538	ENST00000599291	Transcript	downstream_gene_variant	-	-	-	-	-	-	IMPACT=MODIFIER;DISTANCE=1044;STRAND=-1;FLAGS=cds_start_NF,cds_end_NF;SYMBOL=RASIP1;SYMBOL_SOURCE=HGNC;HGNC_ID=24716;NEAREST=MAMSTR
rs11666792	19:49227043	A	ENSG00000176909	ENST00000599703	Transcript	upstream_gene_variant	-	-	-	-	-	-	IMPACT=MODIFIER;DISTANCE=4073;STRAND=-1;FLAGS=cds_end_NF;SYMBOL=MAMSTR;SYMBOL_SOURCE=HGNC;HGNC_ID=26689;NEAREST=MAMSTR
rs11666792	19:49227043	A	ENSG00000105538	ENST00000601530	Transcript	intron_variant,non_coding_transcript_variant	-	-	-	-	-	-	IMPACT=MODIFIER;STRAND=-1;SYMBOL=RASIP1;SYMBOL_SOURCE=HGNC;HGNC_ID=24716;NEAREST=MAMSTR;INTRON=2/3
rs12979891	19:49227256	T	ENSG00000105538	ENST00000222145	Transcript	intron_variant	-	-	-	-	-	-	IMPACT=MODIFIER;STRAND=-1;SYMBOL=RASIP1;SYMBOL_SOURCE=HGNC;HGNC_ID=24716;NEAREST=MAMSTR;INTRON=10/11
rs12979891	19:49227256	T	ENSG00000176909	ENST00000318083	Transcript	upstream_gene_variant	-	-	-	-	-	-	IMPACT=MODIFIER;DISTANCE=4278;STRAND=-1;SYMBOL=MAMSTR;SYMBOL_SOURCE=HGNC;HGNC_ID=26689;NEAREST=MAMSTR
rs12979891	19:49227256	T	ENSG00000176909	ENST00000377367	Transcript	upstream_gene_variant	-	-	-	-	-	-	IMPACT=MODIFIER;DISTANCE=4278;STRAND=-1;SYMBOL=MAMSTR;SYMBOL_SOURCE=HGNC;HGNC_ID=26689;NEAREST=MAMSTR
rs12979891	19:49227256	T	ENSG00000176909	ENST00000419611	Transcript	upstream_gene_variant	-	-	-	-	-	-	IMPACT=MODIFIER;DISTANCE=4278;STRAND=-1;SYMBOL=MAMSTR;SYMBOL_SOURCE=HGNC;HGNC_ID=26689;NEAREST=MAMSTR
rs12979891	19:49227256	T	ENSG00000105538	ENST00000599291	Transcript	downstream_gene_variant	-	-	-	-	-	-	IMPACT=MODIFIER;DISTANCE=831;STRAND=-1;FLAGS=cds_start_NF,cds_end_NF;SYMBOL=RASIP1;SYMBOL_SOURCE=HGNC;HGNC_ID=24716;NEAREST=MAMSTR
rs12979891	19:49227256	T	ENSG00000176909	ENST00000599703	Transcript	upstream_gene_variant	-	-	-	-	-	-	IMPACT=MODIFIER;DISTANCE=4286;STRAND=-1;FLAGS=cds_end_NF;SYMBOL=MAMSTR;SYMBOL_SOURCE=HGNC;HGNC_ID=26689;NEAREST=MAMSTR
rs12979891	19:49227256	T	ENSG00000105538	ENST00000601530	Transcript	intron_variant,non_coding_transcript_variant	-	-	-	-	-	-	IMPACT=MODIFIER;STRAND=-1;SYMBOL=RASIP1;SYMBOL_SOURCE=HGNC;HGNC_ID=24716;NEAREST=MAMSTR;INTRON=2/3
rs11878908	19:49227443	T	ENSG00000105538	ENST00000222145	Transcript	intron_variant	-	-	-	-	-	-	IMPACT=MODIFIER;STRAND=-1;SYMBOL=RASIP1;SYMBOL_SOURCE=HGNC;HGNC_ID=24716;NEAREST=MAMSTR;INTRON=10/11
rs11878908	19:49227443	T	ENSG00000176909	ENST00000318083	Transcript	upstream_gene_variant	-	-	-	-	-	-	IMPACT=MODIFIER;DISTANCE=4465;STRAND=-1;SYMBOL=MAMSTR;SYMBOL_SOURCE=HGNC;HGNC_ID=26689;NEAREST=MAMSTR
rs11878908	19:49227443	T	ENSG00000176909	ENST00000377367	Transcript	upstream_gene_variant	-	-	-	-	-	-	IMPACT=MODIFIER;DISTANCE=4465;STRAND=-1;SYMBOL=MAMSTR;SYMBOL_SOURCE=HGNC;HGNC_ID=26689;NEAREST=MAMSTR
rs11878908	19:49227443	T	ENSG00000176909	ENST00000419611	Transcript	upstream_gene_variant	-	-	-	-	-	-	IMPACT=MODIFIER;DISTANCE=4465;STRAND=-1;SYMBOL=MAMSTR;SYMBOL_SOURCE=HGNC;HGNC_ID=26689;NEAREST=MAMSTR
rs11878908	19:49227443	T	ENSG00000105538	ENST00000599291	Transcript	downstream_gene_variant	-	-	-	-	-	-	IMPACT=MODIFIER;DISTANCE=644;STRAND=-1;FLAGS=cds_start_NF,cds_end_NF;SYMBOL=RASIP1;SYMBOL_SOURCE=HGNC;HGNC_ID=24716;NEAREST=MAMSTR
rs11878908	19:49227443	T	ENSG00000176909	ENST00000599703	Transcript	upstream_gene_variant	-	-	-	-	-	-	IMPACT=MODIFIER;DISTANCE=4473;STRAND=-1;FLAGS=cds_end_NF;SYMBOL=MAMSTR;SYMBOL_SOURCE=HGNC;HGNC_ID=26689;NEAREST=MAMSTR
rs11878908	19:49227443	T	ENSG00000105538	ENST00000601530	Transcript	intron_variant,non_coding_transcript_variant	-	-	-	-	-	-	IMPACT=MODIFIER;STRAND=-1;SYMBOL=RASIP1;SYMBOL_SOURCE=HGNC;HGNC_ID=24716;NEAREST=MAMSTR;INTRON=2/3
rs2287921	19:49228272	C	ENSG00000105538	ENST00000222145	Transcript	intron_variant	-	-	-	-	-	-	IMPACT=MODIFIER;STRAND=-1;SYMBOL=RASIP1;SYMBOL_SOURCE=HGNC;HGNC_ID=24716;NEAREST=MAMSTR;INTRON=8/11
rs2287921	19:49228272	C	ENSG00000105538	ENST00000594232	Transcript	downstream_gene_variant	-	-	-	-	-	-	IMPACT=MODIFIER;DISTANCE=4538;STRAND=-1;SYMBOL=RASIP1;SYMBOL_SOURCE=HGNC;HGNC_ID=24716;NEAREST=MAMSTR
rs2287921	19:49228272	C	ENSG00000105538	ENST00000599291	Transcript	intron_variant	-	-	-	-	-	-	IMPACT=MODIFIER;STRAND=-1;FLAGS=cds_start_NF,cds_end_NF;SYMBOL=RASIP1;SYMBOL_SOURCE=HGNC;HGNC_ID=24716;NEAREST=MAMSTR;INTRON=2/2
rs2287921	19:49228272	C	ENSG00000105538	ENST00000601530	Transcript	non_coding_transcript_exon_variant	567	-	-	-	-	-	IMPACT=MODIFIER;STRAND=-1;SYMBOL=RASIP1;SYMBOL_SOURCE=HGNC;HGNC_ID=24716;NEAREST=MAMSTR;EXON=1/4
rs2287921	19:49228272	C	-	ENSR00000110762	RegulatoryFeature	regulatory_region_variant	-	-	-	-	-	-	IMPACT=MODIFIER;NEAREST=MAMSTR;BIOTYPE=promoter_flanking_region
rs479486	19:49229323	A	ENSG00000105538	ENST00000222145	Transcript	intron_variant	-	-	-	-	-	-	IMPACT=MODIFIER;STRAND=-1;SYMBOL=RASIP1;SYMBOL_SOURCE=HGNC;HGNC_ID=24716;NEAREST=MAMSTR;INTRON=8/11
rs479486	19:49229323	A	ENSG00000105538	ENST00000594232	Transcript	downstream_gene_variant	-	-	-	-	-	-	IMPACT=MODIFIER;DISTANCE=3487;STRAND=-1;SYMBOL=RASIP1;SYMBOL_SOURCE=HGNC;HGNC_ID=24716;NEAREST=MAMSTR
rs479486	19:49229323	A	ENSG00000105538	ENST00000599291	Transcript	intron_variant	-	-	-	-	-	-	IMPACT=MODIFIER;STRAND=-1;FLAGS=cds_start_NF,cds_end_NF;SYMBOL=RASIP1;SYMBOL_SOURCE=HGNC;HGNC_ID=24716;NEAREST=MAMSTR;INTRON=2/2
rs479486	19:49229323	A	ENSG00000105538	ENST00000601530	Transcript	upstream_gene_variant	-	-	-	-	-	-	IMPACT=MODIFIER;DISTANCE=485;STRAND=-1;SYMBOL=RASIP1;SYMBOL_SOURCE=HGNC;HGNC_ID=24716;NEAREST=MAMSTR
rs479486	19:49229323	A	-	ENSR00000110762	RegulatoryFeature	regulatory_region_variant	-	-	-	-	-	-	IMPACT=MODIFIER;NEAREST=MAMSTR;BIOTYPE=promoter_flanking_region
rs8112983	19:49229525	C	ENSG00000105538	ENST00000222145	Transcript	intron_variant	-	-	-	-	-	-	IMPACT=MODIFIER;STRAND=-1;SYMBOL=RASIP1;SYMBOL_SOURCE=HGNC;HGNC_ID=24716;NEAREST=MAMSTR;INTRON=8/11
rs8112983	19:49229525	C	ENSG00000105538	ENST00000594232	Transcript	downstream_gene_variant	-	-	-	-	-	-	IMPACT=MODIFIER;DISTANCE=3285;STRAND=-1;SYMBOL=RASIP1;SYMBOL_SOURCE=HGNC;HGNC_ID=24716;NEAREST=MAMSTR
rs8112983	19:49229525	C	ENSG00000105538	ENST00000599291	Transcript	intron_variant	-	-	-	-	-	-	IMPACT=MODIFIER;STRAND=-1;FLAGS=cds_start_NF,cds_end_NF;SYMBOL=RASIP1;SYMBOL_SOURCE=HGNC;HGNC_ID=24716;NEAREST=MAMSTR;INTRON=2/2
rs8112983	19:49229525	C	ENSG00000105538	ENST00000601530	Transcript	upstream_gene_variant	-	-	-	-	-	-	IMPACT=MODIFIER;DISTANCE=687;STRAND=-1;SYMBOL=RASIP1;SYMBOL_SOURCE=HGNC;HGNC_ID=24716;NEAREST=MAMSTR
rs8112983	19:49229525	C	-	ENSR00000110762	RegulatoryFeature	regulatory_region_variant	-	-	-	-	-	-	IMPACT=MODIFIER;NEAREST=MAMSTR;BIOTYPE=promoter_flanking_region
rs2287922	19:49232226	A	ENSG00000105538	ENST00000222145	Transcript	missense_variant	2006	1801	601	R/C	Cgc/Tgc	-	IMPACT=MODERATE;STRAND=-1;SYMBOL=RASIP1;SYMBOL_SOURCE=HGNC;HGNC_ID=24716;NEAREST=MAMSTR;SIFT=deleterious(0);PolyPhen=possibly_damaging(0.756);EXON=5/12
rs2287922	19:49232226	A	ENSG00000105538	ENST00000594232	Transcript	downstream_gene_variant	-	-	-	-	-	-	IMPACT=MODIFIER;DISTANCE=584;STRAND=-1;SYMBOL=RASIP1;SYMBOL_SOURCE=HGNC;HGNC_ID=24716;NEAREST=MAMSTR
rs2287922	19:49232226	A	ENSG00000105538	ENST00000599291	Transcript	intron_variant	-	-	-	-	-	-	IMPACT=MODIFIER;STRAND=-1;FLAGS=cds_start_NF,cds_end_NF;SYMBOL=RASIP1;SYMBOL_SOURCE=HGNC;HGNC_ID=24716;NEAREST=MAMSTR;INTRON=2/2
rs2287922	19:49232226	A	ENSG00000105538	ENST00000601530	Transcript	upstream_gene_variant	-	-	-	-	-	-	IMPACT=MODIFIER;DISTANCE=3388;STRAND=-1;SYMBOL=RASIP1;SYMBOL_SOURCE=HGNC;HGNC_ID=24716;NEAREST=MAMSTR
rs2287922	19:49232226	A	-	ENSR00000110763	RegulatoryFeature	regulatory_region_variant	-	-	-	-	-	-	IMPACT=MODIFIER;NEAREST=MAMSTR;BIOTYPE=open_chromatin_region
rs281407	19:49233335	A	ENSG00000105538	ENST00000222145	Transcript	intron_variant	-	-	-	-	-	-	IMPACT=MODIFIER;STRAND=-1;SYMBOL=RASIP1;SYMBOL_SOURCE=HGNC;HGNC_ID=24716;NEAREST=RASIP1;INTRON=4/11
rs281407	19:49233335	A	ENSG00000105538	ENST00000594232	Transcript	intron_variant,non_coding_transcript_variant	-	-	-	-	-	-	IMPACT=MODIFIER;STRAND=-1;SYMBOL=RASIP1;SYMBOL_SOURCE=HGNC;HGNC_ID=24716;NEAREST=RASIP1;INTRON=2/2
rs281407	19:49233335	A	ENSG00000105538	ENST00000599291	Transcript	intron_variant	-	-	-	-	-	-	IMPACT=MODIFIER;STRAND=-1;FLAGS=cds_start_NF,cds_end_NF;SYMBOL=RASIP1;SYMBOL_SOURCE=HGNC;HGNC_ID=24716;NEAREST=RASIP1;INTRON=2/2
rs281407	19:49233335	A	ENSG00000105538	ENST00000601530	Transcript	upstream_gene_variant	-	-	-	-	-	-	IMPACT=MODIFIER;DISTANCE=4497;STRAND=-1;SYMBOL=RASIP1;SYMBOL_SOURCE=HGNC;HGNC_ID=24716;NEAREST=RASIP1
rs281408	19:49233406	A	ENSG00000105538	ENST00000222145	Transcript	intron_variant	-	-	-	-	-	-	IMPACT=MODIFIER;STRAND=-1;SYMBOL=RASIP1;SYMBOL_SOURCE=HGNC;HGNC_ID=24716;NEAREST=RASIP1;INTRON=4/11
rs281408	19:49233406	A	ENSG00000105538	ENST00000594232	Transcript	intron_variant,non_coding_transcript_variant	-	-	-	-	-	-	IMPACT=MODIFIER;STRAND=-1;SYMBOL=RASIP1;SYMBOL_SOURCE=HGNC;HGNC_ID=24716;NEAREST=RASIP1;INTRON=2/2
rs281408	19:49233406	A	ENSG00000105538	ENST00000599291	Transcript	intron_variant	-	-	-	-	-	-	IMPACT=MODIFIER;STRAND=-1;FLAGS=cds_start_NF,cds_end_NF;SYMBOL=RASIP1;SYMBOL_SOURCE=HGNC;HGNC_ID=24716;NEAREST=RASIP1;INTRON=2/2
rs281408	19:49233406	A	ENSG00000105538	ENST00000601530	Transcript	upstream_gene_variant	-	-	-	-	-	-	IMPACT=MODIFIER;DISTANCE=4568;STRAND=-1;SYMBOL=RASIP1;SYMBOL_SOURCE=HGNC;HGNC_ID=24716;NEAREST=RASIP1
rs412712	19:49234299	T	ENSG00000105538	ENST00000222145	Transcript	intron_variant	-	-	-	-	-	-	IMPACT=MODIFIER;STRAND=-1;SYMBOL=RASIP1;SYMBOL_SOURCE=HGNC;HGNC_ID=24716;NEAREST=RASIP1;INTRON=4/11
rs412712	19:49234299	T	ENSG00000105538	ENST00000594232	Transcript	intron_variant,non_coding_transcript_variant	-	-	-	-	-	-	IMPACT=MODIFIER;STRAND=-1;SYMBOL=RASIP1;SYMBOL_SOURCE=HGNC;HGNC_ID=24716;NEAREST=RASIP1;INTRON=2/2
rs412712	19:49234299	T	ENSG00000105538	ENST00000599291	Transcript	intron_variant	-	-	-	-	-	-	IMPACT=MODIFIER;STRAND=-1;FLAGS=cds_start_NF,cds_end_NF;SYMBOL=RASIP1;SYMBOL_SOURCE=HGNC;HGNC_ID=24716;NEAREST=RASIP1;INTRON=2/2
rs439523	19:49236102	C	ENSG00000105538	ENST00000222145	Transcript	intron_variant	-	-	-	-	-	-	IMPACT=MODIFIER;STRAND=-1;SYMBOL=RASIP1;SYMBOL_SOURCE=HGNC;HGNC_ID=24716;NEAREST=RASIP1;INTRON=4/11
rs439523	19:49236102	C	ENSG00000105538	ENST00000594232	Transcript	intron_variant,non_coding_transcript_variant	-	-	-	-	-	-	IMPACT=MODIFIER;STRAND=-1;SYMBOL=RASIP1;SYMBOL_SOURCE=HGNC;HGNC_ID=24716;NEAREST=RASIP1;INTRON=2/2
rs439523	19:49236102	C	ENSG00000105538	ENST00000599291	Transcript	intron_variant	-	-	-	-	-	-	IMPACT=MODIFIER;STRAND=-1;FLAGS=cds_start_NF,cds_end_NF;SYMBOL=RASIP1;SYMBOL_SOURCE=HGNC;HGNC_ID=24716;NEAREST=RASIP1;INTRON=2/2
rs12979144	19:49237547	A	ENSG00000105538	ENST00000222145	Transcript	intron_variant	-	-	-	-	-	-	IMPACT=MODIFIER;STRAND=-1;SYMBOL=RASIP1;SYMBOL_SOURCE=HGNC;HGNC_ID=24716;NEAREST=RASIP1;INTRON=4/11
rs12979144	19:49237547	A	ENSG00000105538	ENST00000594232	Transcript	intron_variant,non_coding_transcript_variant	-	-	-	-	-	-	IMPACT=MODIFIER;STRAND=-1;SYMBOL=RASIP1;SYMBOL_SOURCE=HGNC;HGNC_ID=24716;NEAREST=RASIP1;INTRON=2/2
rs12979144	19:49237547	A	ENSG00000105538	ENST00000599291	Transcript	intron_variant	-	-	-	-	-	-	IMPACT=MODIFIER;STRAND=-1;FLAGS=cds_start_NF,cds_end_NF;SYMBOL=RASIP1;SYMBOL_SOURCE=HGNC;HGNC_ID=24716;NEAREST=RASIP1;INTRON=2/2
rs12978499	19:49237552	C	ENSG00000105538	ENST00000222145	Transcript	intron_variant	-	-	-	-	-	-	IMPACT=MODIFIER;STRAND=-1;SYMBOL=RASIP1;SYMBOL_SOURCE=HGNC;HGNC_ID=24716;NEAREST=RASIP1;INTRON=4/11
rs12978499	19:49237552	C	ENSG00000105538	ENST00000594232	Transcript	intron_variant,non_coding_transcript_variant	-	-	-	-	-	-	IMPACT=MODIFIER;STRAND=-1;SYMBOL=RASIP1;SYMBOL_SOURCE=HGNC;HGNC_ID=24716;NEAREST=RASIP1;INTRON=2/2
rs12978499	19:49237552	C	ENSG00000105538	ENST00000599291	Transcript	intron_variant	-	-	-	-	-	-	IMPACT=MODIFIER;STRAND=-1;FLAGS=cds_start_NF,cds_end_NF;SYMBOL=RASIP1;SYMBOL_SOURCE=HGNC;HGNC_ID=24716;NEAREST=RASIP1;INTRON=2/2
rs418464	19:49239026	C	ENSG00000105538	ENST00000222145	Transcript	intron_variant	-	-	-	-	-	-	IMPACT=MODIFIER;STRAND=-1;SYMBOL=RASIP1;SYMBOL_SOURCE=HGNC;HGNC_ID=24716;NEAREST=RASIP1;INTRON=3/11
rs418464	19:49239026	C	ENSG00000105538	ENST00000594232	Transcript	intron_variant,non_coding_transcript_variant	-	-	-	-	-	-	IMPACT=MODIFIER;STRAND=-1;SYMBOL=RASIP1;SYMBOL_SOURCE=HGNC;HGNC_ID=24716;NEAREST=RASIP1;INTRON=1/2
rs418464	19:49239026	C	ENSG00000105538	ENST00000599291	Transcript	intron_variant	-	-	-	-	-	-	IMPACT=MODIFIER;STRAND=-1;FLAGS=cds_start_NF,cds_end_NF;SYMBOL=RASIP1;SYMBOL_SOURCE=HGNC;HGNC_ID=24716;NEAREST=RASIP1;INTRON=1/2
rs452270	19:49239053	C	ENSG00000105538	ENST00000222145	Transcript	intron_variant	-	-	-	-	-	-	IMPACT=MODIFIER;STRAND=-1;SYMBOL=RASIP1;SYMBOL_SOURCE=HGNC;HGNC_ID=24716;NEAREST=RASIP1;INTRON=3/11
rs452270	19:49239053	C	ENSG00000105538	ENST00000594232	Transcript	intron_variant,non_coding_transcript_variant	-	-	-	-	-	-	IMPACT=MODIFIER;STRAND=-1;SYMBOL=RASIP1;SYMBOL_SOURCE=HGNC;HGNC_ID=24716;NEAREST=RASIP1;INTRON=1/2
rs452270	19:49239053	C	ENSG00000105538	ENST00000599291	Transcript	intron_variant	-	-	-	-	-	-	IMPACT=MODIFIER;STRAND=-1;FLAGS=cds_start_NF,cds_end_NF;SYMBOL=RASIP1;SYMBOL_SOURCE=HGNC;HGNC_ID=24716;NEAREST=RASIP1;INTRON=1/2
rs1231281	19:49239200	A	ENSG00000105538	ENST00000222145	Transcript	intron_variant	-	-	-	-	-	-	IMPACT=MODIFIER;STRAND=-1;SYMBOL=RASIP1;SYMBOL_SOURCE=HGNC;HGNC_ID=24716;NEAREST=RASIP1;INTRON=3/11
rs1231281	19:49239200	A	ENSG00000182264	ENST00000332955	Transcript	downstream_gene_variant	-	-	-	-	-	-	IMPACT=MODIFIER;DISTANCE=4945;STRAND=-1;SYMBOL=IZUMO1;SYMBOL_SOURCE=HGNC;HGNC_ID=28539;NEAREST=RASIP1
rs1231281	19:49239200	A	ENSG00000105538	ENST00000594232	Transcript	intron_variant,non_coding_transcript_variant	-	-	-	-	-	-	IMPACT=MODIFIER;STRAND=-1;SYMBOL=RASIP1;SYMBOL_SOURCE=HGNC;HGNC_ID=24716;NEAREST=RASIP1;INTRON=1/2
rs1231281	19:49239200	A	ENSG00000182264	ENST00000595517	Transcript	downstream_gene_variant	-	-	-	-	-	-	IMPACT=MODIFIER;DISTANCE=4965;STRAND=-1;SYMBOL=IZUMO1;SYMBOL_SOURCE=HGNC;HGNC_ID=28539;NEAREST=RASIP1
rs1231281	19:49239200	A	ENSG00000182264	ENST00000595937	Transcript	downstream_gene_variant	-	-	-	-	-	-	IMPACT=MODIFIER;DISTANCE=4965;STRAND=-1;SYMBOL=IZUMO1;SYMBOL_SOURCE=HGNC;HGNC_ID=28539;NEAREST=RASIP1
rs1231281	19:49239200	A	ENSG00000105538	ENST00000599291	Transcript	intron_variant	-	-	-	-	-	-	IMPACT=MODIFIER;STRAND=-1;FLAGS=cds_start_NF,cds_end_NF;SYMBOL=RASIP1;SYMBOL_SOURCE=HGNC;HGNC_ID=24716;NEAREST=RASIP1;INTRON=1/2
rs1231281	19:49239200	A	ENSG00000182264	ENST00000599871	Transcript	downstream_gene_variant	-	-	-	-	-	-	IMPACT=MODIFIER;DISTANCE=4909;STRAND=-1;SYMBOL=IZUMO1;SYMBOL_SOURCE=HGNC;HGNC_ID=28539;NEAREST=RASIP1
rs12981072	19:49241006	G	ENSG00000105538	ENST00000222145	Transcript	intron_variant	-	-	-	-	-	-	IMPACT=MODIFIER;STRAND=-1;SYMBOL=RASIP1;SYMBOL_SOURCE=HGNC;HGNC_ID=24716;NEAREST=RASIP1;INTRON=3/11
rs12981072	19:49241006	G	ENSG00000182264	ENST00000332955	Transcript	downstream_gene_variant	-	-	-	-	-	-	IMPACT=MODIFIER;DISTANCE=3139;STRAND=-1;SYMBOL=IZUMO1;SYMBOL_SOURCE=HGNC;HGNC_ID=28539;NEAREST=RASIP1
rs12981072	19:49241006	G	ENSG00000105538	ENST00000594232	Transcript	intron_variant,non_coding_transcript_variant	-	-	-	-	-	-	IMPACT=MODIFIER;STRAND=-1;SYMBOL=RASIP1;SYMBOL_SOURCE=HGNC;HGNC_ID=24716;NEAREST=RASIP1;INTRON=1/2
rs12981072	19:49241006	G	ENSG00000182264	ENST00000595517	Transcript	downstream_gene_variant	-	-	-	-	-	-	IMPACT=MODIFIER;DISTANCE=3159;STRAND=-1;SYMBOL=IZUMO1;SYMBOL_SOURCE=HGNC;HGNC_ID=28539;NEAREST=RASIP1
rs12981072	19:49241006	G	ENSG00000182264	ENST00000595937	Transcript	downstream_gene_variant	-	-	-	-	-	-	IMPACT=MODIFIER;DISTANCE=3159;STRAND=-1;SYMBOL=IZUMO1;SYMBOL_SOURCE=HGNC;HGNC_ID=28539;NEAREST=RASIP1
rs12981072	19:49241006	G	ENSG00000105538	ENST00000599291	Transcript	intron_variant	-	-	-	-	-	-	IMPACT=MODIFIER;STRAND=-1;FLAGS=cds_start_NF,cds_end_NF;SYMBOL=RASIP1;SYMBOL_SOURCE=HGNC;HGNC_ID=24716;NEAREST=RASIP1;INTRON=1/2
rs12981072	19:49241006	G	ENSG00000182264	ENST00000599871	Transcript	downstream_gene_variant	-	-	-	-	-	-	IMPACT=MODIFIER;DISTANCE=3103;STRAND=-1;SYMBOL=IZUMO1;SYMBOL_SOURCE=HGNC;HGNC_ID=28539;NEAREST=RASIP1
rs380743	19:49241014	A	ENSG00000105538	ENST00000222145	Transcript	intron_variant	-	-	-	-	-	-	IMPACT=MODIFIER;STRAND=-1;SYMBOL=RASIP1;SYMBOL_SOURCE=HGNC;HGNC_ID=24716;NEAREST=RASIP1;INTRON=3/11
rs380743	19:49241014	A	ENSG00000182264	ENST00000332955	Transcript	downstream_gene_variant	-	-	-	-	-	-	IMPACT=MODIFIER;DISTANCE=3131;STRAND=-1;SYMBOL=IZUMO1;SYMBOL_SOURCE=HGNC;HGNC_ID=28539;NEAREST=RASIP1
rs380743	19:49241014	A	ENSG00000105538	ENST00000594232	Transcript	intron_variant,non_coding_transcript_variant	-	-	-	-	-	-	IMPACT=MODIFIER;STRAND=-1;SYMBOL=RASIP1;SYMBOL_SOURCE=HGNC;HGNC_ID=24716;NEAREST=RASIP1;INTRON=1/2
rs380743	19:49241014	A	ENSG00000182264	ENST00000595517	Transcript	downstream_gene_variant	-	-	-	-	-	-	IMPACT=MODIFIER;DISTANCE=3151;STRAND=-1;SYMBOL=IZUMO1;SYMBOL_SOURCE=HGNC;HGNC_ID=28539;NEAREST=RASIP1
rs380743	19:49241014	A	ENSG00000182264	ENST00000595937	Transcript	downstream_gene_variant	-	-	-	-	-	-	IMPACT=MODIFIER;DISTANCE=3151;STRAND=-1;SYMBOL=IZUMO1;SYMBOL_SOURCE=HGNC;HGNC_ID=28539;NEAREST=RASIP1
rs380743	19:49241014	A	ENSG00000105538	ENST00000599291	Transcript	intron_variant	-	-	-	-	-	-	IMPACT=MODIFIER;STRAND=-1;FLAGS=cds_start_NF,cds_end_NF;SYMBOL=RASIP1;SYMBOL_SOURCE=HGNC;HGNC_ID=24716;NEAREST=RASIP1;INTRON=1/2
rs380743	19:49241014	A	ENSG00000182264	ENST00000599871	Transcript	downstream_gene_variant	-	-	-	-	-	-	IMPACT=MODIFIER;DISTANCE=3095;STRAND=-1;SYMBOL=IZUMO1;SYMBOL_SOURCE=HGNC;HGNC_ID=28539;NEAREST=RASIP1
rs427248	19:49241015	T	ENSG00000105538	ENST00000222145	Transcript	intron_variant	-	-	-	-	-	-	IMPACT=MODIFIER;STRAND=-1;SYMBOL=RASIP1;SYMBOL_SOURCE=HGNC;HGNC_ID=24716;NEAREST=RASIP1;INTRON=3/11
rs427248	19:49241015	T	ENSG00000182264	ENST00000332955	Transcript	downstream_gene_variant	-	-	-	-	-	-	IMPACT=MODIFIER;DISTANCE=3130;STRAND=-1;SYMBOL=IZUMO1;SYMBOL_SOURCE=HGNC;HGNC_ID=28539;NEAREST=RASIP1
rs427248	19:49241015	T	ENSG00000105538	ENST00000594232	Transcript	intron_variant,non_coding_transcript_variant	-	-	-	-	-	-	IMPACT=MODIFIER;STRAND=-1;SYMBOL=RASIP1;SYMBOL_SOURCE=HGNC;HGNC_ID=24716;NEAREST=RASIP1;INTRON=1/2
rs427248	19:49241015	T	ENSG00000182264	ENST00000595517	Transcript	downstream_gene_variant	-	-	-	-	-	-	IMPACT=MODIFIER;DISTANCE=3150;STRAND=-1;SYMBOL=IZUMO1;SYMBOL_SOURCE=HGNC;HGNC_ID=28539;NEAREST=RASIP1
rs427248	19:49241015	T	ENSG00000182264	ENST00000595937	Transcript	downstream_gene_variant	-	-	-	-	-	-	IMPACT=MODIFIER;DISTANCE=3150;STRAND=-1;SYMBOL=IZUMO1;SYMBOL_SOURCE=HGNC;HGNC_ID=28539;NEAREST=RASIP1
rs427248	19:49241015	T	ENSG00000105538	ENST00000599291	Transcript	intron_variant	-	-	-	-	-	-	IMPACT=MODIFIER;STRAND=-1;FLAGS=cds_start_NF,cds_end_NF;SYMBOL=RASIP1;SYMBOL_SOURCE=HGNC;HGNC_ID=24716;NEAREST=RASIP1;INTRON=1/2
rs427248	19:49241015	T	ENSG00000182264	ENST00000599871	Transcript	downstream_gene_variant	-	-	-	-	-	-	IMPACT=MODIFIER;DISTANCE=3094;STRAND=-1;SYMBOL=IZUMO1;SYMBOL_SOURCE=HGNC;HGNC_ID=28539;NEAREST=RASIP1
rs56066508	19:49241400	T	ENSG00000105538	ENST00000222145	Transcript	intron_variant	-	-	-	-	-	-	IMPACT=MODIFIER;STRAND=-1;SYMBOL=RASIP1;SYMBOL_SOURCE=HGNC;HGNC_ID=24716;NEAREST=RASIP1;INTRON=3/11
rs56066508	19:49241400	T	ENSG00000182264	ENST00000332955	Transcript	downstream_gene_variant	-	-	-	-	-	-	IMPACT=MODIFIER;DISTANCE=2745;STRAND=-1;SYMBOL=IZUMO1;SYMBOL_SOURCE=HGNC;HGNC_ID=28539;NEAREST=RASIP1
rs56066508	19:49241400	T	ENSG00000105538	ENST00000594232	Transcript	intron_variant,non_coding_transcript_variant	-	-	-	-	-	-	IMPACT=MODIFIER;STRAND=-1;SYMBOL=RASIP1;SYMBOL_SOURCE=HGNC;HGNC_ID=24716;NEAREST=RASIP1;INTRON=1/2
rs56066508	19:49241400	T	ENSG00000182264	ENST00000595517	Transcript	downstream_gene_variant	-	-	-	-	-	-	IMPACT=MODIFIER;DISTANCE=2765;STRAND=-1;SYMBOL=IZUMO1;SYMBOL_SOURCE=HGNC;HGNC_ID=28539;NEAREST=RASIP1
rs56066508	19:49241400	T	ENSG00000182264	ENST00000595937	Transcript	downstream_gene_variant	-	-	-	-	-	-	IMPACT=MODIFIER;DISTANCE=2765;STRAND=-1;SYMBOL=IZUMO1;SYMBOL_SOURCE=HGNC;HGNC_ID=28539;NEAREST=RASIP1
rs56066508	19:49241400	T	ENSG00000182264	ENST00000597553	Transcript	downstream_gene_variant	-	-	-	-	-	-	IMPACT=MODIFIER;DISTANCE=4889;STRAND=-1;SYMBOL=IZUMO1;SYMBOL_SOURCE=HGNC;HGNC_ID=28539;NEAREST=RASIP1
rs56066508	19:49241400	T	ENSG00000105538	ENST00000599291	Transcript	intron_variant	-	-	-	-	-	-	IMPACT=MODIFIER;STRAND=-1;FLAGS=cds_start_NF,cds_end_NF;SYMBOL=RASIP1;SYMBOL_SOURCE=HGNC;HGNC_ID=24716;NEAREST=RASIP1;INTRON=1/2
rs56066508	19:49241400	T	ENSG00000182264	ENST00000599871	Transcript	downstream_gene_variant	-	-	-	-	-	-	IMPACT=MODIFIER;DISTANCE=2709;STRAND=-1;SYMBOL=IZUMO1;SYMBOL_SOURCE=HGNC;HGNC_ID=28539;NEAREST=RASIP1
rs973579	19:49241976	G	ENSG00000105538	ENST00000222145	Transcript	intron_variant	-	-	-	-	-	-	IMPACT=MODIFIER;STRAND=-1;SYMBOL=RASIP1;SYMBOL_SOURCE=HGNC;HGNC_ID=24716;NEAREST=RASIP1;INTRON=3/11
rs973579	19:49241976	G	ENSG00000182264	ENST00000332955	Transcript	downstream_gene_variant	-	-	-	-	-	-	IMPACT=MODIFIER;DISTANCE=2169;STRAND=-1;SYMBOL=IZUMO1;SYMBOL_SOURCE=HGNC;HGNC_ID=28539;NEAREST=RASIP1
rs973579	19:49241976	G	ENSG00000105538	ENST00000594232	Transcript	upstream_gene_variant	-	-	-	-	-	-	IMPACT=MODIFIER;DISTANCE=14;STRAND=-1;SYMBOL=RASIP1;SYMBOL_SOURCE=HGNC;HGNC_ID=24716;NEAREST=RASIP1
rs973579	19:49241976	G	ENSG00000182264	ENST00000595517	Transcript	downstream_gene_variant	-	-	-	-	-	-	IMPACT=MODIFIER;DISTANCE=2189;STRAND=-1;SYMBOL=IZUMO1;SYMBOL_SOURCE=HGNC;HGNC_ID=28539;NEAREST=RASIP1
rs973579	19:49241976	G	ENSG00000182264	ENST00000595937	Transcript	downstream_gene_variant	-	-	-	-	-	-	IMPACT=MODIFIER;DISTANCE=2189;STRAND=-1;SYMBOL=IZUMO1;SYMBOL_SOURCE=HGNC;HGNC_ID=28539;NEAREST=RASIP1
rs973579	19:49241976	G	ENSG00000182264	ENST00000597553	Transcript	downstream_gene_variant	-	-	-	-	-	-	IMPACT=MODIFIER;DISTANCE=4313;STRAND=-1;SYMBOL=IZUMO1;SYMBOL_SOURCE=HGNC;HGNC_ID=28539;NEAREST=RASIP1
rs973579	19:49241976	G	ENSG00000105538	ENST00000599291	Transcript	intron_variant	-	-	-	-	-	-	IMPACT=MODIFIER;STRAND=-1;FLAGS=cds_start_NF,cds_end_NF;SYMBOL=RASIP1;SYMBOL_SOURCE=HGNC;HGNC_ID=24716;NEAREST=RASIP1;INTRON=1/2
rs973579	19:49241976	G	ENSG00000182264	ENST00000599871	Transcript	downstream_gene_variant	-	-	-	-	-	-	IMPACT=MODIFIER;DISTANCE=2133;STRAND=-1;SYMBOL=IZUMO1;SYMBOL_SOURCE=HGNC;HGNC_ID=28539;NEAREST=RASIP1
rs2307018	19:49244219	A	ENSG00000105538	ENST00000222145	Transcript	upstream_gene_variant	-	-	-	-	-	-	IMPACT=MODIFIER;DISTANCE=241;STRAND=-1;SYMBOL=RASIP1;SYMBOL_SOURCE=HGNC;HGNC_ID=24716;NEAREST=RASIP1
rs2307018	19:49244219	A	ENSG00000182264	ENST00000332955	Transcript	synonymous_variant	1547	999	333	A	gcG/gcT	-	IMPACT=LOW;STRAND=-1;SYMBOL=IZUMO1;SYMBOL_SOURCE=HGNC;HGNC_ID=28539;NEAREST=RASIP1;EXON=10/10
rs2307018	19:49244219	A	ENSG00000105538	ENST00000594232	Transcript	upstream_gene_variant	-	-	-	-	-	-	IMPACT=MODIFIER;DISTANCE=2257;STRAND=-1;SYMBOL=RASIP1;SYMBOL_SOURCE=HGNC;HGNC_ID=24716;NEAREST=RASIP1
rs2307018	19:49244219	A	ENSG00000182264	ENST00000595517	Transcript	3_prime_UTR_variant,NMD_transcript_variant	962	-	-	-	-	-	IMPACT=MODIFIER;STRAND=-1;SYMBOL=IZUMO1;SYMBOL_SOURCE=HGNC;HGNC_ID=28539;NEAREST=RASIP1;EXON=9/9
rs2307018	19:49244219	A	ENSG00000182264	ENST00000595937	Transcript	3_prime_UTR_variant,NMD_transcript_variant	1036	-	-	-	-	-	IMPACT=MODIFIER;STRAND=-1;SYMBOL=IZUMO1;SYMBOL_SOURCE=HGNC;HGNC_ID=28539;NEAREST=RASIP1;EXON=9/9
rs2307018	19:49244219	A	ENSG00000182264	ENST00000597553	Transcript	downstream_gene_variant	-	-	-	-	-	-	IMPACT=MODIFIER;DISTANCE=2070;STRAND=-1;SYMBOL=IZUMO1;SYMBOL_SOURCE=HGNC;HGNC_ID=28539;NEAREST=RASIP1
rs2307018	19:49244219	A	ENSG00000105538	ENST00000599291	Transcript	upstream_gene_variant	-	-	-	-	-	-	IMPACT=MODIFIER;DISTANCE=1944;STRAND=-1;FLAGS=cds_start_NF,cds_end_NF;SYMBOL=RASIP1;SYMBOL_SOURCE=HGNC;HGNC_ID=24716;NEAREST=RASIP1
rs2307018	19:49244219	A	ENSG00000182264	ENST00000599871	Transcript	non_coding_transcript_exon_variant	327	-	-	-	-	-	IMPACT=MODIFIER;STRAND=-1;SYMBOL=IZUMO1;SYMBOL_SOURCE=HGNC;HGNC_ID=28539;NEAREST=RASIP1;EXON=2/2
rs2307018	19:49244219	A	ENSG00000182264	ENST00000602105	Transcript	downstream_gene_variant	-	-	-	-	-	-	IMPACT=MODIFIER;DISTANCE=3502;STRAND=-1;FLAGS=cds_end_NF;SYMBOL=IZUMO1;SYMBOL_SOURCE=HGNC;HGNC_ID=28539;NEAREST=RASIP1
rs2307019	19:49244220	A	ENSG00000105538	ENST00000222145	Transcript	upstream_gene_variant	-	-	-	-	-	-	IMPACT=MODIFIER;DISTANCE=242;STRAND=-1;SYMBOL=RASIP1;SYMBOL_SOURCE=HGNC;HGNC_ID=24716;NEAREST=RASIP1
rs2307019	19:49244220	A	ENSG00000182264	ENST00000332955	Transcript	missense_variant	1546	998	333	A/V	gCg/gTg	-	IMPACT=MODERATE;STRAND=-1;SYMBOL=IZUMO1;SYMBOL_SOURCE=HGNC;HGNC_ID=28539;NEAREST=RASIP1;SIFT=tolerated(0.1);PolyPhen=benign(0);EXON=10/10
rs2307019	19:49244220	A	ENSG00000105538	ENST00000594232	Transcript	upstream_gene_variant	-	-	-	-	-	-	IMPACT=MODIFIER;DISTANCE=2258;STRAND=-1;SYMBOL=RASIP1;SYMBOL_SOURCE=HGNC;HGNC_ID=24716;NEAREST=RASIP1
rs2307019	19:49244220	A	ENSG00000182264	ENST00000595517	Transcript	3_prime_UTR_variant,NMD_transcript_variant	961	-	-	-	-	-	IMPACT=MODIFIER;STRAND=-1;SYMBOL=IZUMO1;SYMBOL_SOURCE=HGNC;HGNC_ID=28539;NEAREST=RASIP1;EXON=9/9
rs2307019	19:49244220	A	ENSG00000182264	ENST00000595937	Transcript	3_prime_UTR_variant,NMD_transcript_variant	1035	-	-	-	-	-	IMPACT=MODIFIER;STRAND=-1;SYMBOL=IZUMO1;SYMBOL_SOURCE=HGNC;HGNC_ID=28539;NEAREST=RASIP1;EXON=9/9
rs2307019	19:49244220	A	ENSG00000182264	ENST00000597553	Transcript	downstream_gene_variant	-	-	-	-	-	-	IMPACT=MODIFIER;DISTANCE=2069;STRAND=-1;SYMBOL=IZUMO1;SYMBOL_SOURCE=HGNC;HGNC_ID=28539;NEAREST=RASIP1
rs2307019	19:49244220	A	ENSG00000105538	ENST00000599291	Transcript	upstream_gene_variant	-	-	-	-	-	-	IMPACT=MODIFIER;DISTANCE=1945;STRAND=-1;FLAGS=cds_start_NF,cds_end_NF;SYMBOL=RASIP1;SYMBOL_SOURCE=HGNC;HGNC_ID=24716;NEAREST=RASIP1
rs2307019	19:49244220	A	ENSG00000182264	ENST00000599871	Transcript	non_coding_transcript_exon_variant	326	-	-	-	-	-	IMPACT=MODIFIER;STRAND=-1;SYMBOL=IZUMO1;SYMBOL_SOURCE=HGNC;HGNC_ID=28539;NEAREST=RASIP1;EXON=2/2
rs2307019	19:49244220	A	ENSG00000182264	ENST00000602105	Transcript	downstream_gene_variant	-	-	-	-	-	-	IMPACT=MODIFIER;DISTANCE=3501;STRAND=-1;FLAGS=cds_end_NF;SYMBOL=IZUMO1;SYMBOL_SOURCE=HGNC;HGNC_ID=28539;NEAREST=RASIP1
rs838147	19:49246866	G	ENSG00000105538	ENST00000222145	Transcript	upstream_gene_variant	-	-	-	-	-	-	IMPACT=MODIFIER;DISTANCE=2888;STRAND=-1;SYMBOL=RASIP1;SYMBOL_SOURCE=HGNC;HGNC_ID=24716;NEAREST=RASIP1
rs838147	19:49246866	G	ENSG00000174951	ENST00000310160	Transcript	downstream_gene_variant	-	-	-	-	-	-	IMPACT=MODIFIER;DISTANCE=4402;STRAND=-1;SYMBOL=FUT1;SYMBOL_SOURCE=HGNC;HGNC_ID=4012;NEAREST=RASIP1
rs838147	19:49246866	G	ENSG00000182264	ENST00000332955	Transcript	intron_variant	-	-	-	-	-	-	IMPACT=MODIFIER;STRAND=-1;SYMBOL=IZUMO1;SYMBOL_SOURCE=HGNC;HGNC_ID=28539;NEAREST=RASIP1;INTRON=5/9
rs838147	19:49246866	G	ENSG00000105538	ENST00000594232	Transcript	upstream_gene_variant	-	-	-	-	-	-	IMPACT=MODIFIER;DISTANCE=4904;STRAND=-1;SYMBOL=RASIP1;SYMBOL_SOURCE=HGNC;HGNC_ID=24716;NEAREST=RASIP1
rs838147	19:49246866	G	ENSG00000182264	ENST00000595517	Transcript	intron_variant,NMD_transcript_variant	-	-	-	-	-	-	IMPACT=MODIFIER;STRAND=-1;SYMBOL=IZUMO1;SYMBOL_SOURCE=HGNC;HGNC_ID=28539;NEAREST=RASIP1;INTRON=4/8
rs838147	19:49246866	G	ENSG00000182264	ENST00000595937	Transcript	intron_variant,NMD_transcript_variant	-	-	-	-	-	-	IMPACT=MODIFIER;STRAND=-1;SYMBOL=IZUMO1;SYMBOL_SOURCE=HGNC;HGNC_ID=28539;NEAREST=RASIP1;INTRON=4/8
rs838147	19:49246866	G	ENSG00000182264	ENST00000597553	Transcript	non_coding_transcript_exon_variant	1641	-	-	-	-	-	IMPACT=MODIFIER;STRAND=-1;SYMBOL=IZUMO1;SYMBOL_SOURCE=HGNC;HGNC_ID=28539;NEAREST=RASIP1;EXON=3/3
rs838147	19:49246866	G	ENSG00000105538	ENST00000599291	Transcript	upstream_gene_variant	-	-	-	-	-	-	IMPACT=MODIFIER;DISTANCE=4591;STRAND=-1;FLAGS=cds_start_NF,cds_end_NF;SYMBOL=RASIP1;SYMBOL_SOURCE=HGNC;HGNC_ID=24716;NEAREST=RASIP1
rs838147	19:49246866	G	ENSG00000182264	ENST00000599871	Transcript	upstream_gene_variant	-	-	-	-	-	-	IMPACT=MODIFIER;DISTANCE=2086;STRAND=-1;SYMBOL=IZUMO1;SYMBOL_SOURCE=HGNC;HGNC_ID=28539;NEAREST=RASIP1
rs838147	19:49246866	G	ENSG00000182264	ENST00000602105	Transcript	downstream_gene_variant	-	-	-	-	-	-	IMPACT=MODIFIER;DISTANCE=855;STRAND=-1;FLAGS=cds_end_NF;SYMBOL=IZUMO1;SYMBOL_SOURCE=HGNC;HGNC_ID=28539;NEAREST=RASIP1
rs12462324	19:49247086	G	ENSG00000105538	ENST00000222145	Transcript	upstream_gene_variant	-	-	-	-	-	-	IMPACT=MODIFIER;DISTANCE=3108;STRAND=-1;SYMBOL=RASIP1;SYMBOL_SOURCE=HGNC;HGNC_ID=24716;NEAREST=IZUMO1
rs12462324	19:49247086	G	ENSG00000174951	ENST00000310160	Transcript	downstream_gene_variant	-	-	-	-	-	-	IMPACT=MODIFIER;DISTANCE=4182;STRAND=-1;SYMBOL=FUT1;SYMBOL_SOURCE=HGNC;HGNC_ID=4012;NEAREST=IZUMO1
rs12462324	19:49247086	G	ENSG00000182264	ENST00000332955	Transcript	intron_variant	-	-	-	-	-	-	IMPACT=MODIFIER;STRAND=-1;SYMBOL=IZUMO1;SYMBOL_SOURCE=HGNC;HGNC_ID=28539;NEAREST=IZUMO1;INTRON=5/9
rs12462324	19:49247086	G	ENSG00000182264	ENST00000595517	Transcript	intron_variant,NMD_transcript_variant	-	-	-	-	-	-	IMPACT=MODIFIER;STRAND=-1;SYMBOL=IZUMO1;SYMBOL_SOURCE=HGNC;HGNC_ID=28539;NEAREST=IZUMO1;INTRON=4/8
rs12462324	19:49247086	G	ENSG00000182264	ENST00000595937	Transcript	intron_variant,NMD_transcript_variant	-	-	-	-	-	-	IMPACT=MODIFIER;STRAND=-1;SYMBOL=IZUMO1;SYMBOL_SOURCE=HGNC;HGNC_ID=28539;NEAREST=IZUMO1;INTRON=4/8
rs12462324	19:49247086	G	ENSG00000182264	ENST00000597553	Transcript	non_coding_transcript_exon_variant	1421	-	-	-	-	-	IMPACT=MODIFIER;STRAND=-1;SYMBOL=IZUMO1;SYMBOL_SOURCE=HGNC;HGNC_ID=28539;NEAREST=IZUMO1;EXON=3/3
rs12462324	19:49247086	G	ENSG00000105538	ENST00000599291	Transcript	upstream_gene_variant	-	-	-	-	-	-	IMPACT=MODIFIER;DISTANCE=4811;STRAND=-1;FLAGS=cds_start_NF,cds_end_NF;SYMBOL=RASIP1;SYMBOL_SOURCE=HGNC;HGNC_ID=24716;NEAREST=IZUMO1
rs12462324	19:49247086	G	ENSG00000182264	ENST00000599871	Transcript	upstream_gene_variant	-	-	-	-	-	-	IMPACT=MODIFIER;DISTANCE=2306;STRAND=-1;SYMBOL=IZUMO1;SYMBOL_SOURCE=HGNC;HGNC_ID=28539;NEAREST=IZUMO1
rs12462324	19:49247086	G	ENSG00000182264	ENST00000602105	Transcript	downstream_gene_variant	-	-	-	-	-	-	IMPACT=MODIFIER;DISTANCE=635;STRAND=-1;FLAGS=cds_end_NF;SYMBOL=IZUMO1;SYMBOL_SOURCE=HGNC;HGNC_ID=28539;NEAREST=IZUMO1
rs12460295	19:49247124	G	ENSG00000105538	ENST00000222145	Transcript	upstream_gene_variant	-	-	-	-	-	-	IMPACT=MODIFIER;DISTANCE=3146;STRAND=-1;SYMBOL=RASIP1;SYMBOL_SOURCE=HGNC;HGNC_ID=24716;NEAREST=IZUMO1
rs12460295	19:49247124	G	ENSG00000174951	ENST00000310160	Transcript	downstream_gene_variant	-	-	-	-	-	-	IMPACT=MODIFIER;DISTANCE=4144;STRAND=-1;SYMBOL=FUT1;SYMBOL_SOURCE=HGNC;HGNC_ID=4012;NEAREST=IZUMO1
rs12460295	19:49247124	G	ENSG00000182264	ENST00000332955	Transcript	intron_variant	-	-	-	-	-	-	IMPACT=MODIFIER;STRAND=-1;SYMBOL=IZUMO1;SYMBOL_SOURCE=HGNC;HGNC_ID=28539;NEAREST=IZUMO1;INTRON=5/9
rs12460295	19:49247124	G	ENSG00000182264	ENST00000595517	Transcript	intron_variant,NMD_transcript_variant	-	-	-	-	-	-	IMPACT=MODIFIER;STRAND=-1;SYMBOL=IZUMO1;SYMBOL_SOURCE=HGNC;HGNC_ID=28539;NEAREST=IZUMO1;INTRON=4/8
rs12460295	19:49247124	G	ENSG00000182264	ENST00000595937	Transcript	intron_variant,NMD_transcript_variant	-	-	-	-	-	-	IMPACT=MODIFIER;STRAND=-1;SYMBOL=IZUMO1;SYMBOL_SOURCE=HGNC;HGNC_ID=28539;NEAREST=IZUMO1;INTRON=4/8
rs12460295	19:49247124	G	ENSG00000182264	ENST00000597553	Transcript	non_coding_transcript_exon_variant	1383	-	-	-	-	-	IMPACT=MODIFIER;STRAND=-1;SYMBOL=IZUMO1;SYMBOL_SOURCE=HGNC;HGNC_ID=28539;NEAREST=IZUMO1;EXON=3/3
rs12460295	19:49247124	G	ENSG00000105538	ENST00000599291	Transcript	upstream_gene_variant	-	-	-	-	-	-	IMPACT=MODIFIER;DISTANCE=4849;STRAND=-1;FLAGS=cds_start_NF,cds_end_NF;SYMBOL=RASIP1;SYMBOL_SOURCE=HGNC;HGNC_ID=24716;NEAREST=IZUMO1
rs12460295	19:49247124	G	ENSG00000182264	ENST00000599871	Transcript	upstream_gene_variant	-	-	-	-	-	-	IMPACT=MODIFIER;DISTANCE=2344;STRAND=-1;SYMBOL=IZUMO1;SYMBOL_SOURCE=HGNC;HGNC_ID=28539;NEAREST=IZUMO1
rs12460295	19:49247124	G	ENSG00000182264	ENST00000602105	Transcript	downstream_gene_variant	-	-	-	-	-	-	IMPACT=MODIFIER;DISTANCE=597;STRAND=-1;FLAGS=cds_end_NF;SYMBOL=IZUMO1;SYMBOL_SOURCE=HGNC;HGNC_ID=28539;NEAREST=IZUMO1
rs11672046	19:49247601	T	ENSG00000105538	ENST00000222145	Transcript	upstream_gene_variant	-	-	-	-	-	-	IMPACT=MODIFIER;DISTANCE=3623;STRAND=-1;SYMBOL=RASIP1;SYMBOL_SOURCE=HGNC;HGNC_ID=24716;NEAREST=IZUMO1
rs11672046	19:49247601	T	ENSG00000174951	ENST00000310160	Transcript	downstream_gene_variant	-	-	-	-	-	-	IMPACT=MODIFIER;DISTANCE=3667;STRAND=-1;SYMBOL=FUT1;SYMBOL_SOURCE=HGNC;HGNC_ID=4012;NEAREST=IZUMO1
rs11672046	19:49247601	T	ENSG00000182264	ENST00000332955	Transcript	intron_variant	-	-	-	-	-	-	IMPACT=MODIFIER;STRAND=-1;SYMBOL=IZUMO1;SYMBOL_SOURCE=HGNC;HGNC_ID=28539;NEAREST=IZUMO1;INTRON=4/9
rs11672046	19:49247601	T	ENSG00000182264	ENST00000595517	Transcript	intron_variant,NMD_transcript_variant	-	-	-	-	-	-	IMPACT=MODIFIER;STRAND=-1;SYMBOL=IZUMO1;SYMBOL_SOURCE=HGNC;HGNC_ID=28539;NEAREST=IZUMO1;INTRON=3/8
rs11672046	19:49247601	T	ENSG00000182264	ENST00000595937	Transcript	intron_variant,NMD_transcript_variant	-	-	-	-	-	-	IMPACT=MODIFIER;STRAND=-1;SYMBOL=IZUMO1;SYMBOL_SOURCE=HGNC;HGNC_ID=28539;NEAREST=IZUMO1;INTRON=3/8
rs11672046	19:49247601	T	ENSG00000182264	ENST00000597553	Transcript	intron_variant,non_coding_transcript_variant	-	-	-	-	-	-	IMPACT=MODIFIER;STRAND=-1;SYMBOL=IZUMO1;SYMBOL_SOURCE=HGNC;HGNC_ID=28539;NEAREST=IZUMO1;INTRON=2/2
rs11672046	19:49247601	T	ENSG00000182264	ENST00000599871	Transcript	upstream_gene_variant	-	-	-	-	-	-	IMPACT=MODIFIER;DISTANCE=2821;STRAND=-1;SYMBOL=IZUMO1;SYMBOL_SOURCE=HGNC;HGNC_ID=28539;NEAREST=IZUMO1
rs11672046	19:49247601	T	ENSG00000182264	ENST00000602105	Transcript	downstream_gene_variant	-	-	-	-	-	-	IMPACT=MODIFIER;DISTANCE=120;STRAND=-1;FLAGS=cds_end_NF;SYMBOL=IZUMO1;SYMBOL_SOURCE=HGNC;HGNC_ID=28539;NEAREST=IZUMO1
rs8108136	19:49247693	T	ENSG00000105538	ENST00000222145	Transcript	upstream_gene_variant	-	-	-	-	-	-	IMPACT=MODIFIER;DISTANCE=3715;STRAND=-1;SYMBOL=RASIP1;SYMBOL_SOURCE=HGNC;HGNC_ID=24716;NEAREST=IZUMO1
rs8108136	19:49247693	T	ENSG00000174951	ENST00000310160	Transcript	downstream_gene_variant	-	-	-	-	-	-	IMPACT=MODIFIER;DISTANCE=3575;STRAND=-1;SYMBOL=FUT1;SYMBOL_SOURCE=HGNC;HGNC_ID=4012;NEAREST=IZUMO1
rs8108136	19:49247693	T	ENSG00000182264	ENST00000332955	Transcript	intron_variant	-	-	-	-	-	-	IMPACT=MODIFIER;STRAND=-1;SYMBOL=IZUMO1;SYMBOL_SOURCE=HGNC;HGNC_ID=28539;NEAREST=IZUMO1;INTRON=4/9
rs8108136	19:49247693	T	ENSG00000182264	ENST00000595517	Transcript	intron_variant,NMD_transcript_variant	-	-	-	-	-	-	IMPACT=MODIFIER;STRAND=-1;SYMBOL=IZUMO1;SYMBOL_SOURCE=HGNC;HGNC_ID=28539;NEAREST=IZUMO1;INTRON=3/8
rs8108136	19:49247693	T	ENSG00000182264	ENST00000595937	Transcript	intron_variant,NMD_transcript_variant	-	-	-	-	-	-	IMPACT=MODIFIER;STRAND=-1;SYMBOL=IZUMO1;SYMBOL_SOURCE=HGNC;HGNC_ID=28539;NEAREST=IZUMO1;INTRON=3/8
rs8108136	19:49247693	T	ENSG00000182264	ENST00000597553	Transcript	intron_variant,non_coding_transcript_variant	-	-	-	-	-	-	IMPACT=MODIFIER;STRAND=-1;SYMBOL=IZUMO1;SYMBOL_SOURCE=HGNC;HGNC_ID=28539;NEAREST=IZUMO1;INTRON=2/2
rs8108136	19:49247693	T	ENSG00000182264	ENST00000599871	Transcript	upstream_gene_variant	-	-	-	-	-	-	IMPACT=MODIFIER;DISTANCE=2913;STRAND=-1;SYMBOL=IZUMO1;SYMBOL_SOURCE=HGNC;HGNC_ID=28539;NEAREST=IZUMO1
rs8108136	19:49247693	T	ENSG00000182264	ENST00000602105	Transcript	downstream_gene_variant	-	-	-	-	-	-	IMPACT=MODIFIER;DISTANCE=28;STRAND=-1;FLAGS=cds_end_NF;SYMBOL=IZUMO1;SYMBOL_SOURCE=HGNC;HGNC_ID=28539;NEAREST=IZUMO1
rs8108468	19:49247786	A	ENSG00000105538	ENST00000222145	Transcript	upstream_gene_variant	-	-	-	-	-	-	IMPACT=MODIFIER;DISTANCE=3808;STRAND=-1;SYMBOL=RASIP1;SYMBOL_SOURCE=HGNC;HGNC_ID=24716;NEAREST=IZUMO1
rs8108468	19:49247786	A	ENSG00000174951	ENST00000310160	Transcript	downstream_gene_variant	-	-	-	-	-	-	IMPACT=MODIFIER;DISTANCE=3482;STRAND=-1;SYMBOL=FUT1;SYMBOL_SOURCE=HGNC;HGNC_ID=4012;NEAREST=IZUMO1
rs8108468	19:49247786	A	ENSG00000182264	ENST00000332955	Transcript	synonymous_variant	869	321	107	F	ttC/ttT	-	IMPACT=LOW;STRAND=-1;SYMBOL=IZUMO1;SYMBOL_SOURCE=HGNC;HGNC_ID=28539;NEAREST=IZUMO1;EXON=4/10
rs8108468	19:49247786	A	ENSG00000182264	ENST00000595517	Transcript	3_prime_UTR_variant,NMD_transcript_variant	254	-	-	-	-	-	IMPACT=MODIFIER;STRAND=-1;SYMBOL=IZUMO1;SYMBOL_SOURCE=HGNC;HGNC_ID=28539;NEAREST=IZUMO1;EXON=3/9
rs8108468	19:49247786	A	ENSG00000182264	ENST00000595937	Transcript	synonymous_variant,NMD_transcript_variant	321	321	107	F	ttC/ttT	-	IMPACT=LOW;STRAND=-1;SYMBOL=IZUMO1;SYMBOL_SOURCE=HGNC;HGNC_ID=28539;NEAREST=IZUMO1;EXON=3/9
rs8108468	19:49247786	A	ENSG00000182264	ENST00000597553	Transcript	non_coding_transcript_exon_variant	978	-	-	-	-	-	IMPACT=MODIFIER;STRAND=-1;SYMBOL=IZUMO1;SYMBOL_SOURCE=HGNC;HGNC_ID=28539;NEAREST=IZUMO1;EXON=2/3
rs8108468	19:49247786	A	ENSG00000182264	ENST00000599871	Transcript	upstream_gene_variant	-	-	-	-	-	-	IMPACT=MODIFIER;DISTANCE=3006;STRAND=-1;SYMBOL=IZUMO1;SYMBOL_SOURCE=HGNC;HGNC_ID=28539;NEAREST=IZUMO1
rs8108468	19:49247786	A	ENSG00000182264	ENST00000602105	Transcript	5_prime_UTR_variant	156	-	-	-	-	-	IMPACT=MODIFIER;STRAND=-1;FLAGS=cds_end_NF;SYMBOL=IZUMO1;SYMBOL_SOURCE=HGNC;HGNC_ID=28539;NEAREST=IZUMO1;EXON=3/3
rs8111288	19:49247900	A	ENSG00000105538	ENST00000222145	Transcript	upstream_gene_variant	-	-	-	-	-	-	IMPACT=MODIFIER;DISTANCE=3922;STRAND=-1;SYMBOL=RASIP1;SYMBOL_SOURCE=HGNC;HGNC_ID=24716;NEAREST=IZUMO1
rs8111288	19:49247900	A	ENSG00000174951	ENST00000310160	Transcript	downstream_gene_variant	-	-	-	-	-	-	IMPACT=MODIFIER;DISTANCE=3368;STRAND=-1;SYMBOL=FUT1;SYMBOL_SOURCE=HGNC;HGNC_ID=4012;NEAREST=IZUMO1
rs8111288	19:49247900	A	ENSG00000182264	ENST00000332955	Transcript	intron_variant	-	-	-	-	-	-	IMPACT=MODIFIER;STRAND=-1;SYMBOL=IZUMO1;SYMBOL_SOURCE=HGNC;HGNC_ID=28539;NEAREST=IZUMO1;INTRON=3/9
rs8111288	19:49247900	A	ENSG00000182264	ENST00000595517	Transcript	intron_variant,NMD_transcript_variant	-	-	-	-	-	-	IMPACT=MODIFIER;STRAND=-1;SYMBOL=IZUMO1;SYMBOL_SOURCE=HGNC;HGNC_ID=28539;NEAREST=IZUMO1;INTRON=2/8
rs8111288	19:49247900	A	ENSG00000182264	ENST00000595937	Transcript	intron_variant,NMD_transcript_variant	-	-	-	-	-	-	IMPACT=MODIFIER;STRAND=-1;SYMBOL=IZUMO1;SYMBOL_SOURCE=HGNC;HGNC_ID=28539;NEAREST=IZUMO1;INTRON=2/8
rs8111288	19:49247900	A	ENSG00000182264	ENST00000597553	Transcript	intron_variant,non_coding_transcript_variant	-	-	-	-	-	-	IMPACT=MODIFIER;STRAND=-1;SYMBOL=IZUMO1;SYMBOL_SOURCE=HGNC;HGNC_ID=28539;NEAREST=IZUMO1;INTRON=1/2
rs8111288	19:49247900	A	ENSG00000182264	ENST00000599871	Transcript	upstream_gene_variant	-	-	-	-	-	-	IMPACT=MODIFIER;DISTANCE=3120;STRAND=-1;SYMBOL=IZUMO1;SYMBOL_SOURCE=HGNC;HGNC_ID=28539;NEAREST=IZUMO1
rs8111288	19:49247900	A	ENSG00000182264	ENST00000602105	Transcript	intron_variant	-	-	-	-	-	-	IMPACT=MODIFIER;STRAND=-1;FLAGS=cds_end_NF;SYMBOL=IZUMO1;SYMBOL_SOURCE=HGNC;HGNC_ID=28539;NEAREST=IZUMO1;INTRON=2/2
rs8111399	19:49247963	T	ENSG00000105538	ENST00000222145	Transcript	upstream_gene_variant	-	-	-	-	-	-	IMPACT=MODIFIER;DISTANCE=3985;STRAND=-1;SYMBOL=RASIP1;SYMBOL_SOURCE=HGNC;HGNC_ID=24716;NEAREST=IZUMO1
rs8111399	19:49247963	T	ENSG00000174951	ENST00000310160	Transcript	downstream_gene_variant	-	-	-	-	-	-	IMPACT=MODIFIER;DISTANCE=3305;STRAND=-1;SYMBOL=FUT1;SYMBOL_SOURCE=HGNC;HGNC_ID=4012;NEAREST=IZUMO1
rs8111399	19:49247963	T	ENSG00000182264	ENST00000332955	Transcript	intron_variant	-	-	-	-	-	-	IMPACT=MODIFIER;STRAND=-1;SYMBOL=IZUMO1;SYMBOL_SOURCE=HGNC;HGNC_ID=28539;NEAREST=IZUMO1;INTRON=3/9
rs8111399	19:49247963	T	ENSG00000182264	ENST00000595517	Transcript	intron_variant,NMD_transcript_variant	-	-	-	-	-	-	IMPACT=MODIFIER;STRAND=-1;SYMBOL=IZUMO1;SYMBOL_SOURCE=HGNC;HGNC_ID=28539;NEAREST=IZUMO1;INTRON=2/8
rs8111399	19:49247963	T	ENSG00000182264	ENST00000595937	Transcript	intron_variant,NMD_transcript_variant	-	-	-	-	-	-	IMPACT=MODIFIER;STRAND=-1;SYMBOL=IZUMO1;SYMBOL_SOURCE=HGNC;HGNC_ID=28539;NEAREST=IZUMO1;INTRON=2/8
rs8111399	19:49247963	T	ENSG00000182264	ENST00000597553	Transcript	intron_variant,non_coding_transcript_variant	-	-	-	-	-	-	IMPACT=MODIFIER;STRAND=-1;SYMBOL=IZUMO1;SYMBOL_SOURCE=HGNC;HGNC_ID=28539;NEAREST=IZUMO1;INTRON=1/2
rs8111399	19:49247963	T	ENSG00000182264	ENST00000599871	Transcript	upstream_gene_variant	-	-	-	-	-	-	IMPACT=MODIFIER;DISTANCE=3183;STRAND=-1;SYMBOL=IZUMO1;SYMBOL_SOURCE=HGNC;HGNC_ID=28539;NEAREST=IZUMO1
rs8111399	19:49247963	T	ENSG00000182264	ENST00000602105	Transcript	intron_variant	-	-	-	-	-	-	IMPACT=MODIFIER;STRAND=-1;FLAGS=cds_end_NF;SYMBOL=IZUMO1;SYMBOL_SOURCE=HGNC;HGNC_ID=28539;NEAREST=IZUMO1;INTRON=2/2
rs8111208	19:49248022	C	ENSG00000105538	ENST00000222145	Transcript	upstream_gene_variant	-	-	-	-	-	-	IMPACT=MODIFIER;DISTANCE=4044;STRAND=-1;SYMBOL=RASIP1;SYMBOL_SOURCE=HGNC;HGNC_ID=24716;NEAREST=IZUMO1
rs8111208	19:49248022	C	ENSG00000174951	ENST00000310160	Transcript	downstream_gene_variant	-	-	-	-	-	-	IMPACT=MODIFIER;DISTANCE=3246;STRAND=-1;SYMBOL=FUT1;SYMBOL_SOURCE=HGNC;HGNC_ID=4012;NEAREST=IZUMO1
rs8111208	19:49248022	C	ENSG00000182264	ENST00000332955	Transcript	intron_variant	-	-	-	-	-	-	IMPACT=MODIFIER;STRAND=-1;SYMBOL=IZUMO1;SYMBOL_SOURCE=HGNC;HGNC_ID=28539;NEAREST=IZUMO1;INTRON=3/9
rs8111208	19:49248022	C	ENSG00000182264	ENST00000595517	Transcript	intron_variant,NMD_transcript_variant	-	-	-	-	-	-	IMPACT=MODIFIER;STRAND=-1;SYMBOL=IZUMO1;SYMBOL_SOURCE=HGNC;HGNC_ID=28539;NEAREST=IZUMO1;INTRON=2/8
rs8111208	19:49248022	C	ENSG00000182264	ENST00000595937	Transcript	intron_variant,NMD_transcript_variant	-	-	-	-	-	-	IMPACT=MODIFIER;STRAND=-1;SYMBOL=IZUMO1;SYMBOL_SOURCE=HGNC;HGNC_ID=28539;NEAREST=IZUMO1;INTRON=2/8
rs8111208	19:49248022	C	ENSG00000182264	ENST00000597553	Transcript	intron_variant,non_coding_transcript_variant	-	-	-	-	-	-	IMPACT=MODIFIER;STRAND=-1;SYMBOL=IZUMO1;SYMBOL_SOURCE=HGNC;HGNC_ID=28539;NEAREST=IZUMO1;INTRON=1/2
rs8111208	19:49248022	C	ENSG00000182264	ENST00000599871	Transcript	upstream_gene_variant	-	-	-	-	-	-	IMPACT=MODIFIER;DISTANCE=3242;STRAND=-1;SYMBOL=IZUMO1;SYMBOL_SOURCE=HGNC;HGNC_ID=28539;NEAREST=IZUMO1
rs8111208	19:49248022	C	ENSG00000182264	ENST00000602105	Transcript	intron_variant	-	-	-	-	-	-	IMPACT=MODIFIER;STRAND=-1;FLAGS=cds_end_NF;SYMBOL=IZUMO1;SYMBOL_SOURCE=HGNC;HGNC_ID=28539;NEAREST=IZUMO1;INTRON=2/2
rs11083948	19:49248120	G	ENSG00000105538	ENST00000222145	Transcript	upstream_gene_variant	-	-	-	-	-	-	IMPACT=MODIFIER;DISTANCE=4142;STRAND=-1;SYMBOL=RASIP1;SYMBOL_SOURCE=HGNC;HGNC_ID=24716;NEAREST=IZUMO1
rs11083948	19:49248120	G	ENSG00000174951	ENST00000310160	Transcript	downstream_gene_variant	-	-	-	-	-	-	IMPACT=MODIFIER;DISTANCE=3148;STRAND=-1;SYMBOL=FUT1;SYMBOL_SOURCE=HGNC;HGNC_ID=4012;NEAREST=IZUMO1
rs11083948	19:49248120	G	ENSG00000182264	ENST00000332955	Transcript	intron_variant	-	-	-	-	-	-	IMPACT=MODIFIER;STRAND=-1;SYMBOL=IZUMO1;SYMBOL_SOURCE=HGNC;HGNC_ID=28539;NEAREST=IZUMO1;INTRON=3/9
rs11083948	19:49248120	G	ENSG00000182264	ENST00000595517	Transcript	intron_variant,NMD_transcript_variant	-	-	-	-	-	-	IMPACT=MODIFIER;STRAND=-1;SYMBOL=IZUMO1;SYMBOL_SOURCE=HGNC;HGNC_ID=28539;NEAREST=IZUMO1;INTRON=2/8
rs11083948	19:49248120	G	ENSG00000182264	ENST00000595937	Transcript	intron_variant,NMD_transcript_variant	-	-	-	-	-	-	IMPACT=MODIFIER;STRAND=-1;SYMBOL=IZUMO1;SYMBOL_SOURCE=HGNC;HGNC_ID=28539;NEAREST=IZUMO1;INTRON=2/8
rs11083948	19:49248120	G	ENSG00000182264	ENST00000597553	Transcript	intron_variant,non_coding_transcript_variant	-	-	-	-	-	-	IMPACT=MODIFIER;STRAND=-1;SYMBOL=IZUMO1;SYMBOL_SOURCE=HGNC;HGNC_ID=28539;NEAREST=IZUMO1;INTRON=1/2
rs11083948	19:49248120	G	ENSG00000182264	ENST00000599871	Transcript	upstream_gene_variant	-	-	-	-	-	-	IMPACT=MODIFIER;DISTANCE=3340;STRAND=-1;SYMBOL=IZUMO1;SYMBOL_SOURCE=HGNC;HGNC_ID=28539;NEAREST=IZUMO1
rs11083948	19:49248120	G	ENSG00000182264	ENST00000602105	Transcript	intron_variant	-	-	-	-	-	-	IMPACT=MODIFIER;STRAND=-1;FLAGS=cds_end_NF;SYMBOL=IZUMO1;SYMBOL_SOURCE=HGNC;HGNC_ID=28539;NEAREST=IZUMO1;INTRON=2/2
rs12611201	19:49248255	A	ENSG00000105538	ENST00000222145	Transcript	upstream_gene_variant	-	-	-	-	-	-	IMPACT=MODIFIER;DISTANCE=4277;STRAND=-1;SYMBOL=RASIP1;SYMBOL_SOURCE=HGNC;HGNC_ID=24716;NEAREST=IZUMO1
rs12611201	19:49248255	A	ENSG00000174951	ENST00000310160	Transcript	downstream_gene_variant	-	-	-	-	-	-	IMPACT=MODIFIER;DISTANCE=3013;STRAND=-1;SYMBOL=FUT1;SYMBOL_SOURCE=HGNC;HGNC_ID=4012;NEAREST=IZUMO1
rs12611201	19:49248255	A	ENSG00000182264	ENST00000332955	Transcript	intron_variant	-	-	-	-	-	-	IMPACT=MODIFIER;STRAND=-1;SYMBOL=IZUMO1;SYMBOL_SOURCE=HGNC;HGNC_ID=28539;NEAREST=IZUMO1;INTRON=3/9
rs12611201	19:49248255	A	ENSG00000182264	ENST00000595517	Transcript	intron_variant,NMD_transcript_variant	-	-	-	-	-	-	IMPACT=MODIFIER;STRAND=-1;SYMBOL=IZUMO1;SYMBOL_SOURCE=HGNC;HGNC_ID=28539;NEAREST=IZUMO1;INTRON=2/8
rs12611201	19:49248255	A	ENSG00000182264	ENST00000595937	Transcript	intron_variant,NMD_transcript_variant	-	-	-	-	-	-	IMPACT=MODIFIER;STRAND=-1;SYMBOL=IZUMO1;SYMBOL_SOURCE=HGNC;HGNC_ID=28539;NEAREST=IZUMO1;INTRON=2/8
rs12611201	19:49248255	A	ENSG00000182264	ENST00000597553	Transcript	intron_variant,non_coding_transcript_variant	-	-	-	-	-	-	IMPACT=MODIFIER;STRAND=-1;SYMBOL=IZUMO1;SYMBOL_SOURCE=HGNC;HGNC_ID=28539;NEAREST=IZUMO1;INTRON=1/2
rs12611201	19:49248255	A	ENSG00000182264	ENST00000599871	Transcript	upstream_gene_variant	-	-	-	-	-	-	IMPACT=MODIFIER;DISTANCE=3475;STRAND=-1;SYMBOL=IZUMO1;SYMBOL_SOURCE=HGNC;HGNC_ID=28539;NEAREST=IZUMO1
rs12611201	19:49248255	A	ENSG00000182264	ENST00000602105	Transcript	intron_variant	-	-	-	-	-	-	IMPACT=MODIFIER;STRAND=-1;FLAGS=cds_end_NF;SYMBOL=IZUMO1;SYMBOL_SOURCE=HGNC;HGNC_ID=28539;NEAREST=IZUMO1;INTRON=2/2
rs12611203	19:49248295	A	ENSG00000105538	ENST00000222145	Transcript	upstream_gene_variant	-	-	-	-	-	-	IMPACT=MODIFIER;DISTANCE=4317;STRAND=-1;SYMBOL=RASIP1;SYMBOL_SOURCE=HGNC;HGNC_ID=24716;NEAREST=IZUMO1
rs12611203	19:49248295	A	ENSG00000174951	ENST00000310160	Transcript	downstream_gene_variant	-	-	-	-	-	-	IMPACT=MODIFIER;DISTANCE=2973;STRAND=-1;SYMBOL=FUT1;SYMBOL_SOURCE=HGNC;HGNC_ID=4012;NEAREST=IZUMO1
rs12611203	19:49248295	A	ENSG00000182264	ENST00000332955	Transcript	intron_variant	-	-	-	-	-	-	IMPACT=MODIFIER;STRAND=-1;SYMBOL=IZUMO1;SYMBOL_SOURCE=HGNC;HGNC_ID=28539;NEAREST=IZUMO1;INTRON=3/9
rs12611203	19:49248295	A	ENSG00000182264	ENST00000595517	Transcript	intron_variant,NMD_transcript_variant	-	-	-	-	-	-	IMPACT=MODIFIER;STRAND=-1;SYMBOL=IZUMO1;SYMBOL_SOURCE=HGNC;HGNC_ID=28539;NEAREST=IZUMO1;INTRON=2/8
rs12611203	19:49248295	A	ENSG00000182264	ENST00000595937	Transcript	intron_variant,NMD_transcript_variant	-	-	-	-	-	-	IMPACT=MODIFIER;STRAND=-1;SYMBOL=IZUMO1;SYMBOL_SOURCE=HGNC;HGNC_ID=28539;NEAREST=IZUMO1;INTRON=2/8
rs12611203	19:49248295	A	ENSG00000182264	ENST00000597553	Transcript	intron_variant,non_coding_transcript_variant	-	-	-	-	-	-	IMPACT=MODIFIER;STRAND=-1;SYMBOL=IZUMO1;SYMBOL_SOURCE=HGNC;HGNC_ID=28539;NEAREST=IZUMO1;INTRON=1/2
rs12611203	19:49248295	A	ENSG00000182264	ENST00000599871	Transcript	upstream_gene_variant	-	-	-	-	-	-	IMPACT=MODIFIER;DISTANCE=3515;STRAND=-1;SYMBOL=IZUMO1;SYMBOL_SOURCE=HGNC;HGNC_ID=28539;NEAREST=IZUMO1
rs12611203	19:49248295	A	ENSG00000182264	ENST00000602105	Transcript	intron_variant	-	-	-	-	-	-	IMPACT=MODIFIER;STRAND=-1;FLAGS=cds_end_NF;SYMBOL=IZUMO1;SYMBOL_SOURCE=HGNC;HGNC_ID=28539;NEAREST=IZUMO1;INTRON=2/2
rs12611211	19:49248331	A	ENSG00000105538	ENST00000222145	Transcript	upstream_gene_variant	-	-	-	-	-	-	IMPACT=MODIFIER;DISTANCE=4353;STRAND=-1;SYMBOL=RASIP1;SYMBOL_SOURCE=HGNC;HGNC_ID=24716;NEAREST=IZUMO1
rs12611211	19:49248331	A	ENSG00000174951	ENST00000310160	Transcript	downstream_gene_variant	-	-	-	-	-	-	IMPACT=MODIFIER;DISTANCE=2937;STRAND=-1;SYMBOL=FUT1;SYMBOL_SOURCE=HGNC;HGNC_ID=4012;NEAREST=IZUMO1
rs12611211	19:49248331	A	ENSG00000182264	ENST00000332955	Transcript	intron_variant	-	-	-	-	-	-	IMPACT=MODIFIER;STRAND=-1;SYMBOL=IZUMO1;SYMBOL_SOURCE=HGNC;HGNC_ID=28539;NEAREST=IZUMO1;INTRON=3/9
rs12611211	19:49248331	A	ENSG00000182264	ENST00000595517	Transcript	intron_variant,NMD_transcript_variant	-	-	-	-	-	-	IMPACT=MODIFIER;STRAND=-1;SYMBOL=IZUMO1;SYMBOL_SOURCE=HGNC;HGNC_ID=28539;NEAREST=IZUMO1;INTRON=2/8
rs12611211	19:49248331	A	ENSG00000182264	ENST00000595937	Transcript	intron_variant,NMD_transcript_variant	-	-	-	-	-	-	IMPACT=MODIFIER;STRAND=-1;SYMBOL=IZUMO1;SYMBOL_SOURCE=HGNC;HGNC_ID=28539;NEAREST=IZUMO1;INTRON=2/8
rs12611211	19:49248331	A	ENSG00000182264	ENST00000597553	Transcript	intron_variant,non_coding_transcript_variant	-	-	-	-	-	-	IMPACT=MODIFIER;STRAND=-1;SYMBOL=IZUMO1;SYMBOL_SOURCE=HGNC;HGNC_ID=28539;NEAREST=IZUMO1;INTRON=1/2
rs12611211	19:49248331	A	ENSG00000182264	ENST00000599871	Transcript	upstream_gene_variant	-	-	-	-	-	-	IMPACT=MODIFIER;DISTANCE=3551;STRAND=-1;SYMBOL=IZUMO1;SYMBOL_SOURCE=HGNC;HGNC_ID=28539;NEAREST=IZUMO1
rs12611211	19:49248331	A	ENSG00000182264	ENST00000602105	Transcript	intron_variant	-	-	-	-	-	-	IMPACT=MODIFIER;STRAND=-1;FLAGS=cds_end_NF;SYMBOL=IZUMO1;SYMBOL_SOURCE=HGNC;HGNC_ID=28539;NEAREST=IZUMO1;INTRON=2/2
rs12982115	19:49248640	G	ENSG00000105538	ENST00000222145	Transcript	upstream_gene_variant	-	-	-	-	-	-	IMPACT=MODIFIER;DISTANCE=4662;STRAND=-1;SYMBOL=RASIP1;SYMBOL_SOURCE=HGNC;HGNC_ID=24716;NEAREST=IZUMO1
rs12982115	19:49248640	G	ENSG00000174951	ENST00000310160	Transcript	downstream_gene_variant	-	-	-	-	-	-	IMPACT=MODIFIER;DISTANCE=2628;STRAND=-1;SYMBOL=FUT1;SYMBOL_SOURCE=HGNC;HGNC_ID=4012;NEAREST=IZUMO1
rs12982115	19:49248640	G	ENSG00000182264	ENST00000332955	Transcript	intron_variant	-	-	-	-	-	-	IMPACT=MODIFIER;STRAND=-1;SYMBOL=IZUMO1;SYMBOL_SOURCE=HGNC;HGNC_ID=28539;NEAREST=IZUMO1;INTRON=2/9
rs12982115	19:49248640	G	ENSG00000182264	ENST00000595517	Transcript	intron_variant,NMD_transcript_variant	-	-	-	-	-	-	IMPACT=MODIFIER;STRAND=-1;SYMBOL=IZUMO1;SYMBOL_SOURCE=HGNC;HGNC_ID=28539;NEAREST=IZUMO1;INTRON=1/8
rs12982115	19:49248640	G	ENSG00000182264	ENST00000595937	Transcript	intron_variant,NMD_transcript_variant	-	-	-	-	-	-	IMPACT=MODIFIER;STRAND=-1;SYMBOL=IZUMO1;SYMBOL_SOURCE=HGNC;HGNC_ID=28539;NEAREST=IZUMO1;INTRON=1/8
rs12982115	19:49248640	G	ENSG00000182264	ENST00000597553	Transcript	non_coding_transcript_exon_variant	798	-	-	-	-	-	IMPACT=MODIFIER;STRAND=-1;SYMBOL=IZUMO1;SYMBOL_SOURCE=HGNC;HGNC_ID=28539;NEAREST=IZUMO1;EXON=1/3
rs12982115	19:49248640	G	ENSG00000182264	ENST00000599871	Transcript	upstream_gene_variant	-	-	-	-	-	-	IMPACT=MODIFIER;DISTANCE=3860;STRAND=-1;SYMBOL=IZUMO1;SYMBOL_SOURCE=HGNC;HGNC_ID=28539;NEAREST=IZUMO1
rs12982115	19:49248640	G	ENSG00000182264	ENST00000602105	Transcript	intron_variant	-	-	-	-	-	-	IMPACT=MODIFIER;STRAND=-1;FLAGS=cds_end_NF;SYMBOL=IZUMO1;SYMBOL_SOURCE=HGNC;HGNC_ID=28539;NEAREST=IZUMO1;INTRON=1/2
rs12982115	19:49248640	G	-	ENSR00000382475	RegulatoryFeature	regulatory_region_variant	-	-	-	-	-	-	IMPACT=MODIFIER;NEAREST=IZUMO1;BIOTYPE=open_chromatin_region
rs838145	19:49248730	A	ENSG00000105538	ENST00000222145	Transcript	upstream_gene_variant	-	-	-	-	-	-	IMPACT=MODIFIER;DISTANCE=4752;STRAND=-1;SYMBOL=RASIP1;SYMBOL_SOURCE=HGNC;HGNC_ID=24716;NEAREST=IZUMO1
rs838145	19:49248730	A	ENSG00000174951	ENST00000310160	Transcript	downstream_gene_variant	-	-	-	-	-	-	IMPACT=MODIFIER;DISTANCE=2538;STRAND=-1;SYMBOL=FUT1;SYMBOL_SOURCE=HGNC;HGNC_ID=4012;NEAREST=IZUMO1
rs838145	19:49248730	A	ENSG00000182264	ENST00000332955	Transcript	intron_variant	-	-	-	-	-	-	IMPACT=MODIFIER;STRAND=-1;SYMBOL=IZUMO1;SYMBOL_SOURCE=HGNC;HGNC_ID=28539;NEAREST=IZUMO1;INTRON=2/9
rs838145	19:49248730	A	ENSG00000182264	ENST00000595517	Transcript	intron_variant,NMD_transcript_variant	-	-	-	-	-	-	IMPACT=MODIFIER;STRAND=-1;SYMBOL=IZUMO1;SYMBOL_SOURCE=HGNC;HGNC_ID=28539;NEAREST=IZUMO1;INTRON=1/8
rs838145	19:49248730	A	ENSG00000182264	ENST00000595937	Transcript	intron_variant,NMD_transcript_variant	-	-	-	-	-	-	IMPACT=MODIFIER;STRAND=-1;SYMBOL=IZUMO1;SYMBOL_SOURCE=HGNC;HGNC_ID=28539;NEAREST=IZUMO1;INTRON=1/8
rs838145	19:49248730	A	ENSG00000182264	ENST00000597553	Transcript	non_coding_transcript_exon_variant	708	-	-	-	-	-	IMPACT=MODIFIER;STRAND=-1;SYMBOL=IZUMO1;SYMBOL_SOURCE=HGNC;HGNC_ID=28539;NEAREST=IZUMO1;EXON=1/3
rs838145	19:49248730	A	ENSG00000182264	ENST00000599871	Transcript	upstream_gene_variant	-	-	-	-	-	-	IMPACT=MODIFIER;DISTANCE=3950;STRAND=-1;SYMBOL=IZUMO1;SYMBOL_SOURCE=HGNC;HGNC_ID=28539;NEAREST=IZUMO1
rs838145	19:49248730	A	ENSG00000182264	ENST00000602105	Transcript	intron_variant	-	-	-	-	-	-	IMPACT=MODIFIER;STRAND=-1;FLAGS=cds_end_NF;SYMBOL=IZUMO1;SYMBOL_SOURCE=HGNC;HGNC_ID=28539;NEAREST=IZUMO1;INTRON=1/2
rs838145	19:49248730	A	-	ENSR00000382475	RegulatoryFeature	regulatory_region_variant	-	-	-	-	-	-	IMPACT=MODIFIER;NEAREST=IZUMO1;BIOTYPE=open_chromatin_region
rs12975033	19:49249443	T	ENSG00000174951	ENST00000310160	Transcript	downstream_gene_variant	-	-	-	-	-	-	IMPACT=MODIFIER;DISTANCE=1825;STRAND=-1;SYMBOL=FUT1;SYMBOL_SOURCE=HGNC;HGNC_ID=4012;NEAREST=IZUMO1
rs12975033	19:49249443	T	ENSG00000182264	ENST00000332955	Transcript	intron_variant	-	-	-	-	-	-	IMPACT=MODIFIER;STRAND=-1;SYMBOL=IZUMO1;SYMBOL_SOURCE=HGNC;HGNC_ID=28539;NEAREST=IZUMO1;INTRON=1/9
rs12975033	19:49249443	T	ENSG00000182264	ENST00000595517	Transcript	upstream_gene_variant	-	-	-	-	-	-	IMPACT=MODIFIER;DISTANCE=327;STRAND=-1;SYMBOL=IZUMO1;SYMBOL_SOURCE=HGNC;HGNC_ID=28539;NEAREST=IZUMO1
rs12975033	19:49249443	T	ENSG00000182264	ENST00000595937	Transcript	upstream_gene_variant	-	-	-	-	-	-	IMPACT=MODIFIER;DISTANCE=327;STRAND=-1;SYMBOL=IZUMO1;SYMBOL_SOURCE=HGNC;HGNC_ID=28539;NEAREST=IZUMO1
rs12975033	19:49249443	T	ENSG00000182264	ENST00000597553	Transcript	upstream_gene_variant	-	-	-	-	-	-	IMPACT=MODIFIER;DISTANCE=6;STRAND=-1;SYMBOL=IZUMO1;SYMBOL_SOURCE=HGNC;HGNC_ID=28539;NEAREST=IZUMO1
rs12975033	19:49249443	T	ENSG00000182264	ENST00000599871	Transcript	upstream_gene_variant	-	-	-	-	-	-	IMPACT=MODIFIER;DISTANCE=4663;STRAND=-1;SYMBOL=IZUMO1;SYMBOL_SOURCE=HGNC;HGNC_ID=28539;NEAREST=IZUMO1
rs12975033	19:49249443	T	ENSG00000182264	ENST00000602105	Transcript	intron_variant	-	-	-	-	-	-	IMPACT=MODIFIER;STRAND=-1;FLAGS=cds_end_NF;SYMBOL=IZUMO1;SYMBOL_SOURCE=HGNC;HGNC_ID=28539;NEAREST=IZUMO1;INTRON=1/2
rs12975781	19:49249698	T	ENSG00000174951	ENST00000310160	Transcript	downstream_gene_variant	-	-	-	-	-	-	IMPACT=MODIFIER;DISTANCE=1570;STRAND=-1;SYMBOL=FUT1;SYMBOL_SOURCE=HGNC;HGNC_ID=4012;NEAREST=IZUMO1
rs12975781	19:49249698	T	ENSG00000182264	ENST00000332955	Transcript	5_prime_UTR_variant	469	-	-	-	-	-	IMPACT=MODIFIER;STRAND=-1;SYMBOL=IZUMO1;SYMBOL_SOURCE=HGNC;HGNC_ID=28539;NEAREST=IZUMO1;EXON=1/10
rs12975781	19:49249698	T	ENSG00000182264	ENST00000595517	Transcript	upstream_gene_variant	-	-	-	-	-	-	IMPACT=MODIFIER;DISTANCE=582;STRAND=-1;SYMBOL=IZUMO1;SYMBOL_SOURCE=HGNC;HGNC_ID=28539;NEAREST=IZUMO1
rs12975781	19:49249698	T	ENSG00000182264	ENST00000595937	Transcript	upstream_gene_variant	-	-	-	-	-	-	IMPACT=MODIFIER;DISTANCE=582;STRAND=-1;SYMBOL=IZUMO1;SYMBOL_SOURCE=HGNC;HGNC_ID=28539;NEAREST=IZUMO1
rs12975781	19:49249698	T	ENSG00000182264	ENST00000597553	Transcript	upstream_gene_variant	-	-	-	-	-	-	IMPACT=MODIFIER;DISTANCE=261;STRAND=-1;SYMBOL=IZUMO1;SYMBOL_SOURCE=HGNC;HGNC_ID=28539;NEAREST=IZUMO1
rs12975781	19:49249698	T	ENSG00000182264	ENST00000599871	Transcript	upstream_gene_variant	-	-	-	-	-	-	IMPACT=MODIFIER;DISTANCE=4918;STRAND=-1;SYMBOL=IZUMO1;SYMBOL_SOURCE=HGNC;HGNC_ID=28539;NEAREST=IZUMO1
rs12975781	19:49249698	T	ENSG00000182264	ENST00000602105	Transcript	intron_variant	-	-	-	-	-	-	IMPACT=MODIFIER;STRAND=-1;FLAGS=cds_end_NF;SYMBOL=IZUMO1;SYMBOL_SOURCE=HGNC;HGNC_ID=28539;NEAREST=IZUMO1;INTRON=1/2
rs8102032	19:49249795	T	ENSG00000174951	ENST00000310160	Transcript	downstream_gene_variant	-	-	-	-	-	-	IMPACT=MODIFIER;DISTANCE=1473;STRAND=-1;SYMBOL=FUT1;SYMBOL_SOURCE=HGNC;HGNC_ID=4012;NEAREST=IZUMO1
rs8102032	19:49249795	T	ENSG00000182264	ENST00000332955	Transcript	5_prime_UTR_variant	372	-	-	-	-	-	IMPACT=MODIFIER;STRAND=-1;SYMBOL=IZUMO1;SYMBOL_SOURCE=HGNC;HGNC_ID=28539;NEAREST=IZUMO1;EXON=1/10
rs8102032	19:49249795	T	ENSG00000182264	ENST00000595517	Transcript	upstream_gene_variant	-	-	-	-	-	-	IMPACT=MODIFIER;DISTANCE=679;STRAND=-1;SYMBOL=IZUMO1;SYMBOL_SOURCE=HGNC;HGNC_ID=28539;NEAREST=IZUMO1
rs8102032	19:49249795	T	ENSG00000182264	ENST00000595937	Transcript	upstream_gene_variant	-	-	-	-	-	-	IMPACT=MODIFIER;DISTANCE=679;STRAND=-1;SYMBOL=IZUMO1;SYMBOL_SOURCE=HGNC;HGNC_ID=28539;NEAREST=IZUMO1
rs8102032	19:49249795	T	ENSG00000182264	ENST00000597553	Transcript	upstream_gene_variant	-	-	-	-	-	-	IMPACT=MODIFIER;DISTANCE=358;STRAND=-1;SYMBOL=IZUMO1;SYMBOL_SOURCE=HGNC;HGNC_ID=28539;NEAREST=IZUMO1
rs8102032	19:49249795	T	ENSG00000182264	ENST00000602105	Transcript	intron_variant	-	-	-	-	-	-	IMPACT=MODIFIER;STRAND=-1;FLAGS=cds_end_NF;SYMBOL=IZUMO1;SYMBOL_SOURCE=HGNC;HGNC_ID=28539;NEAREST=IZUMO1;INTRON=1/2
rs8104897	19:49249814	A	ENSG00000174951	ENST00000310160	Transcript	downstream_gene_variant	-	-	-	-	-	-	IMPACT=MODIFIER;DISTANCE=1454;STRAND=-1;SYMBOL=FUT1;SYMBOL_SOURCE=HGNC;HGNC_ID=4012;NEAREST=IZUMO1
rs8104897	19:49249814	A	ENSG00000182264	ENST00000332955	Transcript	5_prime_UTR_variant	353	-	-	-	-	-	IMPACT=MODIFIER;STRAND=-1;SYMBOL=IZUMO1;SYMBOL_SOURCE=HGNC;HGNC_ID=28539;NEAREST=IZUMO1;EXON=1/10
rs8104897	19:49249814	A	ENSG00000182264	ENST00000595517	Transcript	upstream_gene_variant	-	-	-	-	-	-	IMPACT=MODIFIER;DISTANCE=698;STRAND=-1;SYMBOL=IZUMO1;SYMBOL_SOURCE=HGNC;HGNC_ID=28539;NEAREST=IZUMO1
rs8104897	19:49249814	A	ENSG00000182264	ENST00000595937	Transcript	upstream_gene_variant	-	-	-	-	-	-	IMPACT=MODIFIER;DISTANCE=698;STRAND=-1;SYMBOL=IZUMO1;SYMBOL_SOURCE=HGNC;HGNC_ID=28539;NEAREST=IZUMO1
rs8104897	19:49249814	A	ENSG00000182264	ENST00000597553	Transcript	upstream_gene_variant	-	-	-	-	-	-	IMPACT=MODIFIER;DISTANCE=377;STRAND=-1;SYMBOL=IZUMO1;SYMBOL_SOURCE=HGNC;HGNC_ID=28539;NEAREST=IZUMO1
rs8104897	19:49249814	A	ENSG00000182264	ENST00000602105	Transcript	intron_variant	-	-	-	-	-	-	IMPACT=MODIFIER;STRAND=-1;FLAGS=cds_end_NF;SYMBOL=IZUMO1;SYMBOL_SOURCE=HGNC;HGNC_ID=28539;NEAREST=IZUMO1;INTRON=1/2
rs8105137	19:49249888	A	ENSG00000174951	ENST00000310160	Transcript	downstream_gene_variant	-	-	-	-	-	-	IMPACT=MODIFIER;DISTANCE=1380;STRAND=-1;SYMBOL=FUT1;SYMBOL_SOURCE=HGNC;HGNC_ID=4012;NEAREST=IZUMO1
rs8105137	19:49249888	A	ENSG00000182264	ENST00000332955	Transcript	5_prime_UTR_variant	279	-	-	-	-	-	IMPACT=MODIFIER;STRAND=-1;SYMBOL=IZUMO1;SYMBOL_SOURCE=HGNC;HGNC_ID=28539;NEAREST=IZUMO1;EXON=1/10
rs8105137	19:49249888	A	ENSG00000182264	ENST00000595517	Transcript	upstream_gene_variant	-	-	-	-	-	-	IMPACT=MODIFIER;DISTANCE=772;STRAND=-1;SYMBOL=IZUMO1;SYMBOL_SOURCE=HGNC;HGNC_ID=28539;NEAREST=IZUMO1
rs8105137	19:49249888	A	ENSG00000182264	ENST00000595937	Transcript	upstream_gene_variant	-	-	-	-	-	-	IMPACT=MODIFIER;DISTANCE=772;STRAND=-1;SYMBOL=IZUMO1;SYMBOL_SOURCE=HGNC;HGNC_ID=28539;NEAREST=IZUMO1
rs8105137	19:49249888	A	ENSG00000182264	ENST00000597553	Transcript	upstream_gene_variant	-	-	-	-	-	-	IMPACT=MODIFIER;DISTANCE=451;STRAND=-1;SYMBOL=IZUMO1;SYMBOL_SOURCE=HGNC;HGNC_ID=28539;NEAREST=IZUMO1
rs8105137	19:49249888	A	ENSG00000182264	ENST00000602105	Transcript	intron_variant	-	-	-	-	-	-	IMPACT=MODIFIER;STRAND=-1;FLAGS=cds_end_NF;SYMBOL=IZUMO1;SYMBOL_SOURCE=HGNC;HGNC_ID=28539;NEAREST=IZUMO1;INTRON=1/2
rs8106205	19:49250197	C	ENSG00000174951	ENST00000310160	Transcript	downstream_gene_variant	-	-	-	-	-	-	IMPACT=MODIFIER;DISTANCE=1071;STRAND=-1;SYMBOL=FUT1;SYMBOL_SOURCE=HGNC;HGNC_ID=4012;NEAREST=IZUMO1
rs8106205	19:49250197	C	ENSG00000182264	ENST00000332955	Transcript	upstream_gene_variant	-	-	-	-	-	-	IMPACT=MODIFIER;DISTANCE=31;STRAND=-1;SYMBOL=IZUMO1;SYMBOL_SOURCE=HGNC;HGNC_ID=28539;NEAREST=IZUMO1
rs8106205	19:49250197	C	ENSG00000182264	ENST00000595517	Transcript	upstream_gene_variant	-	-	-	-	-	-	IMPACT=MODIFIER;DISTANCE=1081;STRAND=-1;SYMBOL=IZUMO1;SYMBOL_SOURCE=HGNC;HGNC_ID=28539;NEAREST=IZUMO1
rs8106205	19:49250197	C	ENSG00000182264	ENST00000595937	Transcript	upstream_gene_variant	-	-	-	-	-	-	IMPACT=MODIFIER;DISTANCE=1081;STRAND=-1;SYMBOL=IZUMO1;SYMBOL_SOURCE=HGNC;HGNC_ID=28539;NEAREST=IZUMO1
rs8106205	19:49250197	C	ENSG00000182264	ENST00000597553	Transcript	upstream_gene_variant	-	-	-	-	-	-	IMPACT=MODIFIER;DISTANCE=760;STRAND=-1;SYMBOL=IZUMO1;SYMBOL_SOURCE=HGNC;HGNC_ID=28539;NEAREST=IZUMO1
rs8106205	19:49250197	C	ENSG00000182264	ENST00000602105	Transcript	upstream_gene_variant	-	-	-	-	-	-	IMPACT=MODIFIER;DISTANCE=143;STRAND=-1;FLAGS=cds_end_NF;SYMBOL=IZUMO1;SYMBOL_SOURCE=HGNC;HGNC_ID=28539;NEAREST=IZUMO1
rs838144	19:49250239	T	ENSG00000174951	ENST00000310160	Transcript	downstream_gene_variant	-	-	-	-	-	-	IMPACT=MODIFIER;DISTANCE=1029;STRAND=-1;SYMBOL=FUT1;SYMBOL_SOURCE=HGNC;HGNC_ID=4012;NEAREST=IZUMO1
rs838144	19:49250239	T	ENSG00000182264	ENST00000332955	Transcript	upstream_gene_variant	-	-	-	-	-	-	IMPACT=MODIFIER;DISTANCE=73;STRAND=-1;SYMBOL=IZUMO1;SYMBOL_SOURCE=HGNC;HGNC_ID=28539;NEAREST=IZUMO1
rs838144	19:49250239	T	ENSG00000182264	ENST00000595517	Transcript	upstream_gene_variant	-	-	-	-	-	-	IMPACT=MODIFIER;DISTANCE=1123;STRAND=-1;SYMBOL=IZUMO1;SYMBOL_SOURCE=HGNC;HGNC_ID=28539;NEAREST=IZUMO1
rs838144	19:49250239	T	ENSG00000182264	ENST00000595937	Transcript	upstream_gene_variant	-	-	-	-	-	-	IMPACT=MODIFIER;DISTANCE=1123;STRAND=-1;SYMBOL=IZUMO1;SYMBOL_SOURCE=HGNC;HGNC_ID=28539;NEAREST=IZUMO1
rs838144	19:49250239	T	ENSG00000182264	ENST00000597553	Transcript	upstream_gene_variant	-	-	-	-	-	-	IMPACT=MODIFIER;DISTANCE=802;STRAND=-1;SYMBOL=IZUMO1;SYMBOL_SOURCE=HGNC;HGNC_ID=28539;NEAREST=IZUMO1
rs838144	19:49250239	T	ENSG00000182264	ENST00000602105	Transcript	upstream_gene_variant	-	-	-	-	-	-	IMPACT=MODIFIER;DISTANCE=185;STRAND=-1;FLAGS=cds_end_NF;SYMBOL=IZUMO1;SYMBOL_SOURCE=HGNC;HGNC_ID=28539;NEAREST=IZUMO1
rs838144	19:49250239	T	-	ENSR00000110767	RegulatoryFeature	regulatory_region_variant	-	-	-	-	-	-	IMPACT=MODIFIER;NEAREST=IZUMO1;BIOTYPE=promoter
rs11667321	19:49250538	G	ENSG00000174951	ENST00000310160	Transcript	downstream_gene_variant	-	-	-	-	-	-	IMPACT=MODIFIER;DISTANCE=730;STRAND=-1;SYMBOL=FUT1;SYMBOL_SOURCE=HGNC;HGNC_ID=4012;NEAREST=IZUMO1
rs11667321	19:49250538	G	ENSG00000182264	ENST00000332955	Transcript	upstream_gene_variant	-	-	-	-	-	-	IMPACT=MODIFIER;DISTANCE=372;STRAND=-1;SYMBOL=IZUMO1;SYMBOL_SOURCE=HGNC;HGNC_ID=28539;NEAREST=IZUMO1
rs11667321	19:49250538	G	ENSG00000182264	ENST00000595517	Transcript	upstream_gene_variant	-	-	-	-	-	-	IMPACT=MODIFIER;DISTANCE=1422;STRAND=-1;SYMBOL=IZUMO1;SYMBOL_SOURCE=HGNC;HGNC_ID=28539;NEAREST=IZUMO1
rs11667321	19:49250538	G	ENSG00000182264	ENST00000595937	Transcript	upstream_gene_variant	-	-	-	-	-	-	IMPACT=MODIFIER;DISTANCE=1422;STRAND=-1;SYMBOL=IZUMO1;SYMBOL_SOURCE=HGNC;HGNC_ID=28539;NEAREST=IZUMO1
rs11667321	19:49250538	G	ENSG00000182264	ENST00000597553	Transcript	upstream_gene_variant	-	-	-	-	-	-	IMPACT=MODIFIER;DISTANCE=1101;STRAND=-1;SYMBOL=IZUMO1;SYMBOL_SOURCE=HGNC;HGNC_ID=28539;NEAREST=IZUMO1
rs11667321	19:49250538	G	ENSG00000182264	ENST00000602105	Transcript	upstream_gene_variant	-	-	-	-	-	-	IMPACT=MODIFIER;DISTANCE=484;STRAND=-1;FLAGS=cds_end_NF;SYMBOL=IZUMO1;SYMBOL_SOURCE=HGNC;HGNC_ID=28539;NEAREST=IZUMO1
rs11667321	19:49250538	G	-	ENSR00000110767	RegulatoryFeature	regulatory_region_variant	-	-	-	-	-	-	IMPACT=MODIFIER;NEAREST=IZUMO1;BIOTYPE=promoter
rs28400015	19:49250633	A	ENSG00000174951	ENST00000310160	Transcript	downstream_gene_variant	-	-	-	-	-	-	IMPACT=MODIFIER;DISTANCE=635;STRAND=-1;SYMBOL=FUT1;SYMBOL_SOURCE=HGNC;HGNC_ID=4012;NEAREST=IZUMO1
rs28400015	19:49250633	A	ENSG00000182264	ENST00000332955	Transcript	upstream_gene_variant	-	-	-	-	-	-	IMPACT=MODIFIER;DISTANCE=467;STRAND=-1;SYMBOL=IZUMO1;SYMBOL_SOURCE=HGNC;HGNC_ID=28539;NEAREST=IZUMO1
rs28400015	19:49250633	A	ENSG00000182264	ENST00000595517	Transcript	upstream_gene_variant	-	-	-	-	-	-	IMPACT=MODIFIER;DISTANCE=1517;STRAND=-1;SYMBOL=IZUMO1;SYMBOL_SOURCE=HGNC;HGNC_ID=28539;NEAREST=IZUMO1
rs28400015	19:49250633	A	ENSG00000182264	ENST00000595937	Transcript	upstream_gene_variant	-	-	-	-	-	-	IMPACT=MODIFIER;DISTANCE=1517;STRAND=-1;SYMBOL=IZUMO1;SYMBOL_SOURCE=HGNC;HGNC_ID=28539;NEAREST=IZUMO1
rs28400015	19:49250633	A	ENSG00000182264	ENST00000597553	Transcript	upstream_gene_variant	-	-	-	-	-	-	IMPACT=MODIFIER;DISTANCE=1196;STRAND=-1;SYMBOL=IZUMO1;SYMBOL_SOURCE=HGNC;HGNC_ID=28539;NEAREST=IZUMO1
rs28400015	19:49250633	A	ENSG00000182264	ENST00000602105	Transcript	upstream_gene_variant	-	-	-	-	-	-	IMPACT=MODIFIER;DISTANCE=579;STRAND=-1;FLAGS=cds_end_NF;SYMBOL=IZUMO1;SYMBOL_SOURCE=HGNC;HGNC_ID=28539;NEAREST=IZUMO1
rs28400014	19:49250657	G	ENSG00000174951	ENST00000310160	Transcript	downstream_gene_variant	-	-	-	-	-	-	IMPACT=MODIFIER;DISTANCE=611;STRAND=-1;SYMBOL=FUT1;SYMBOL_SOURCE=HGNC;HGNC_ID=4012;NEAREST=IZUMO1
rs28400014	19:49250657	G	ENSG00000182264	ENST00000332955	Transcript	upstream_gene_variant	-	-	-	-	-	-	IMPACT=MODIFIER;DISTANCE=491;STRAND=-1;SYMBOL=IZUMO1;SYMBOL_SOURCE=HGNC;HGNC_ID=28539;NEAREST=IZUMO1
rs28400014	19:49250657	G	ENSG00000182264	ENST00000595517	Transcript	upstream_gene_variant	-	-	-	-	-	-	IMPACT=MODIFIER;DISTANCE=1541;STRAND=-1;SYMBOL=IZUMO1;SYMBOL_SOURCE=HGNC;HGNC_ID=28539;NEAREST=IZUMO1
rs28400014	19:49250657	G	ENSG00000182264	ENST00000595937	Transcript	upstream_gene_variant	-	-	-	-	-	-	IMPACT=MODIFIER;DISTANCE=1541;STRAND=-1;SYMBOL=IZUMO1;SYMBOL_SOURCE=HGNC;HGNC_ID=28539;NEAREST=IZUMO1
rs28400014	19:49250657	G	ENSG00000182264	ENST00000597553	Transcript	upstream_gene_variant	-	-	-	-	-	-	IMPACT=MODIFIER;DISTANCE=1220;STRAND=-1;SYMBOL=IZUMO1;SYMBOL_SOURCE=HGNC;HGNC_ID=28539;NEAREST=IZUMO1
rs28400014	19:49250657	G	ENSG00000182264	ENST00000602105	Transcript	upstream_gene_variant	-	-	-	-	-	-	IMPACT=MODIFIER;DISTANCE=603;STRAND=-1;FLAGS=cds_end_NF;SYMBOL=IZUMO1;SYMBOL_SOURCE=HGNC;HGNC_ID=28539;NEAREST=IZUMO1
rs838142	19:49252151	G	ENSG00000174951	ENST00000310160	Transcript	3_prime_UTR_variant	3363	-	-	-	-	-	IMPACT=MODIFIER;STRAND=-1;SYMBOL=FUT1;SYMBOL_SOURCE=HGNC;HGNC_ID=4012;NEAREST=IZUMO1;EXON=4/4
rs838142	19:49252151	G	ENSG00000182264	ENST00000332955	Transcript	upstream_gene_variant	-	-	-	-	-	-	IMPACT=MODIFIER;DISTANCE=1985;STRAND=-1;SYMBOL=IZUMO1;SYMBOL_SOURCE=HGNC;HGNC_ID=28539;NEAREST=IZUMO1
rs838142	19:49252151	G	ENSG00000182264	ENST00000595517	Transcript	upstream_gene_variant	-	-	-	-	-	-	IMPACT=MODIFIER;DISTANCE=3035;STRAND=-1;SYMBOL=IZUMO1;SYMBOL_SOURCE=HGNC;HGNC_ID=28539;NEAREST=IZUMO1
rs838142	19:49252151	G	ENSG00000182264	ENST00000595937	Transcript	upstream_gene_variant	-	-	-	-	-	-	IMPACT=MODIFIER;DISTANCE=3035;STRAND=-1;SYMBOL=IZUMO1;SYMBOL_SOURCE=HGNC;HGNC_ID=28539;NEAREST=IZUMO1
rs838142	19:49252151	G	ENSG00000174951	ENST00000597220	Transcript	downstream_gene_variant	-	-	-	-	-	-	IMPACT=MODIFIER;DISTANCE=3718;STRAND=-1;SYMBOL=FUT1;SYMBOL_SOURCE=HGNC;HGNC_ID=4012;NEAREST=IZUMO1
rs838142	19:49252151	G	ENSG00000182264	ENST00000597553	Transcript	upstream_gene_variant	-	-	-	-	-	-	IMPACT=MODIFIER;DISTANCE=2714;STRAND=-1;SYMBOL=IZUMO1;SYMBOL_SOURCE=HGNC;HGNC_ID=28539;NEAREST=IZUMO1
rs838142	19:49252151	G	ENSG00000174951	ENST00000599826	Transcript	downstream_gene_variant	-	-	-	-	-	-	IMPACT=MODIFIER;DISTANCE=3718;STRAND=-1;SYMBOL=FUT1;SYMBOL_SOURCE=HGNC;HGNC_ID=4012;NEAREST=IZUMO1
rs838142	19:49252151	G	ENSG00000174951	ENST00000601931	Transcript	downstream_gene_variant	-	-	-	-	-	-	IMPACT=MODIFIER;DISTANCE=3718;STRAND=-1;SYMBOL=FUT1;SYMBOL_SOURCE=HGNC;HGNC_ID=4012;NEAREST=IZUMO1
rs838142	19:49252151	G	ENSG00000174951	ENST00000601988	Transcript	downstream_gene_variant	-	-	-	-	-	-	IMPACT=MODIFIER;DISTANCE=3718;STRAND=-1;SYMBOL=FUT1;SYMBOL_SOURCE=HGNC;HGNC_ID=4012;NEAREST=IZUMO1
rs838142	19:49252151	G	ENSG00000182264	ENST00000602105	Transcript	upstream_gene_variant	-	-	-	-	-	-	IMPACT=MODIFIER;DISTANCE=2097;STRAND=-1;FLAGS=cds_end_NF;SYMBOL=IZUMO1;SYMBOL_SOURCE=HGNC;HGNC_ID=28539;NEAREST=IZUMO1
rs838140	19:49252698	T	ENSG00000174951	ENST00000310160	Transcript	3_prime_UTR_variant	2816	-	-	-	-	-	IMPACT=MODIFIER;STRAND=-1;SYMBOL=FUT1;SYMBOL_SOURCE=HGNC;HGNC_ID=4012;NEAREST=IZUMO1;EXON=4/4
rs838140	19:49252698	T	ENSG00000182264	ENST00000332955	Transcript	upstream_gene_variant	-	-	-	-	-	-	IMPACT=MODIFIER;DISTANCE=2532;STRAND=-1;SYMBOL=IZUMO1;SYMBOL_SOURCE=HGNC;HGNC_ID=28539;NEAREST=IZUMO1
rs838140	19:49252698	T	ENSG00000182264	ENST00000595517	Transcript	upstream_gene_variant	-	-	-	-	-	-	IMPACT=MODIFIER;DISTANCE=3582;STRAND=-1;SYMBOL=IZUMO1;SYMBOL_SOURCE=HGNC;HGNC_ID=28539;NEAREST=IZUMO1
rs838140	19:49252698	T	ENSG00000182264	ENST00000595937	Transcript	upstream_gene_variant	-	-	-	-	-	-	IMPACT=MODIFIER;DISTANCE=3582;STRAND=-1;SYMBOL=IZUMO1;SYMBOL_SOURCE=HGNC;HGNC_ID=28539;NEAREST=IZUMO1
rs838140	19:49252698	T	ENSG00000174951	ENST00000597220	Transcript	downstream_gene_variant	-	-	-	-	-	-	IMPACT=MODIFIER;DISTANCE=3171;STRAND=-1;SYMBOL=FUT1;SYMBOL_SOURCE=HGNC;HGNC_ID=4012;NEAREST=IZUMO1
rs838140	19:49252698	T	ENSG00000182264	ENST00000597553	Transcript	upstream_gene_variant	-	-	-	-	-	-	IMPACT=MODIFIER;DISTANCE=3261;STRAND=-1;SYMBOL=IZUMO1;SYMBOL_SOURCE=HGNC;HGNC_ID=28539;NEAREST=IZUMO1
rs838140	19:49252698	T	ENSG00000174951	ENST00000599826	Transcript	downstream_gene_variant	-	-	-	-	-	-	IMPACT=MODIFIER;DISTANCE=3171;STRAND=-1;SYMBOL=FUT1;SYMBOL_SOURCE=HGNC;HGNC_ID=4012;NEAREST=IZUMO1
rs838140	19:49252698	T	ENSG00000174951	ENST00000601931	Transcript	downstream_gene_variant	-	-	-	-	-	-	IMPACT=MODIFIER;DISTANCE=3171;STRAND=-1;SYMBOL=FUT1;SYMBOL_SOURCE=HGNC;HGNC_ID=4012;NEAREST=IZUMO1
rs838140	19:49252698	T	ENSG00000174951	ENST00000601988	Transcript	downstream_gene_variant	-	-	-	-	-	-	IMPACT=MODIFIER;DISTANCE=3171;STRAND=-1;SYMBOL=FUT1;SYMBOL_SOURCE=HGNC;HGNC_ID=4012;NEAREST=IZUMO1
rs838140	19:49252698	T	ENSG00000182264	ENST00000602105	Transcript	upstream_gene_variant	-	-	-	-	-	-	IMPACT=MODIFIER;DISTANCE=2644;STRAND=-1;FLAGS=cds_end_NF;SYMBOL=IZUMO1;SYMBOL_SOURCE=HGNC;HGNC_ID=28539;NEAREST=IZUMO1
rs4021	19:49253261	G	ENSG00000174951	ENST00000310160	Transcript	3_prime_UTR_variant	2253	-	-	-	-	-	IMPACT=MODIFIER;STRAND=-1;SYMBOL=FUT1;SYMBOL_SOURCE=HGNC;HGNC_ID=4012;NEAREST=IZUMO1;EXON=4/4
rs4021	19:49253261	G	ENSG00000182264	ENST00000332955	Transcript	upstream_gene_variant	-	-	-	-	-	-	IMPACT=MODIFIER;DISTANCE=3095;STRAND=-1;SYMBOL=IZUMO1;SYMBOL_SOURCE=HGNC;HGNC_ID=28539;NEAREST=IZUMO1
rs4021	19:49253261	G	ENSG00000182264	ENST00000595517	Transcript	upstream_gene_variant	-	-	-	-	-	-	IMPACT=MODIFIER;DISTANCE=4145;STRAND=-1;SYMBOL=IZUMO1;SYMBOL_SOURCE=HGNC;HGNC_ID=28539;NEAREST=IZUMO1
rs4021	19:49253261	G	ENSG00000182264	ENST00000595937	Transcript	upstream_gene_variant	-	-	-	-	-	-	IMPACT=MODIFIER;DISTANCE=4145;STRAND=-1;SYMBOL=IZUMO1;SYMBOL_SOURCE=HGNC;HGNC_ID=28539;NEAREST=IZUMO1
rs4021	19:49253261	G	ENSG00000174951	ENST00000597220	Transcript	downstream_gene_variant	-	-	-	-	-	-	IMPACT=MODIFIER;DISTANCE=2608;STRAND=-1;SYMBOL=FUT1;SYMBOL_SOURCE=HGNC;HGNC_ID=4012;NEAREST=IZUMO1
rs4021	19:49253261	G	ENSG00000182264	ENST00000597553	Transcript	upstream_gene_variant	-	-	-	-	-	-	IMPACT=MODIFIER;DISTANCE=3824;STRAND=-1;SYMBOL=IZUMO1;SYMBOL_SOURCE=HGNC;HGNC_ID=28539;NEAREST=IZUMO1
rs4021	19:49253261	G	ENSG00000174951	ENST00000599826	Transcript	downstream_gene_variant	-	-	-	-	-	-	IMPACT=MODIFIER;DISTANCE=2608;STRAND=-1;SYMBOL=FUT1;SYMBOL_SOURCE=HGNC;HGNC_ID=4012;NEAREST=IZUMO1
rs4021	19:49253261	G	ENSG00000174951	ENST00000601931	Transcript	downstream_gene_variant	-	-	-	-	-	-	IMPACT=MODIFIER;DISTANCE=2608;STRAND=-1;SYMBOL=FUT1;SYMBOL_SOURCE=HGNC;HGNC_ID=4012;NEAREST=IZUMO1
rs4021	19:49253261	G	ENSG00000174951	ENST00000601988	Transcript	downstream_gene_variant	-	-	-	-	-	-	IMPACT=MODIFIER;DISTANCE=2608;STRAND=-1;SYMBOL=FUT1;SYMBOL_SOURCE=HGNC;HGNC_ID=4012;NEAREST=IZUMO1
rs4021	19:49253261	G	ENSG00000182264	ENST00000602105	Transcript	upstream_gene_variant	-	-	-	-	-	-	IMPACT=MODIFIER;DISTANCE=3207;STRAND=-1;FLAGS=cds_end_NF;SYMBOL=IZUMO1;SYMBOL_SOURCE=HGNC;HGNC_ID=28539;NEAREST=IZUMO1
rs4015	19:49253389	T	ENSG00000174951	ENST00000310160	Transcript	3_prime_UTR_variant	2125	-	-	-	-	-	IMPACT=MODIFIER;STRAND=-1;SYMBOL=FUT1;SYMBOL_SOURCE=HGNC;HGNC_ID=4012;NEAREST=IZUMO1;EXON=4/4
rs4015	19:49253389	T	ENSG00000182264	ENST00000332955	Transcript	upstream_gene_variant	-	-	-	-	-	-	IMPACT=MODIFIER;DISTANCE=3223;STRAND=-1;SYMBOL=IZUMO1;SYMBOL_SOURCE=HGNC;HGNC_ID=28539;NEAREST=IZUMO1
rs4015	19:49253389	T	ENSG00000182264	ENST00000595517	Transcript	upstream_gene_variant	-	-	-	-	-	-	IMPACT=MODIFIER;DISTANCE=4273;STRAND=-1;SYMBOL=IZUMO1;SYMBOL_SOURCE=HGNC;HGNC_ID=28539;NEAREST=IZUMO1
rs4015	19:49253389	T	ENSG00000182264	ENST00000595937	Transcript	upstream_gene_variant	-	-	-	-	-	-	IMPACT=MODIFIER;DISTANCE=4273;STRAND=-1;SYMBOL=IZUMO1;SYMBOL_SOURCE=HGNC;HGNC_ID=28539;NEAREST=IZUMO1
rs4015	19:49253389	T	ENSG00000174951	ENST00000597220	Transcript	downstream_gene_variant	-	-	-	-	-	-	IMPACT=MODIFIER;DISTANCE=2480;STRAND=-1;SYMBOL=FUT1;SYMBOL_SOURCE=HGNC;HGNC_ID=4012;NEAREST=IZUMO1
rs4015	19:49253389	T	ENSG00000182264	ENST00000597553	Transcript	upstream_gene_variant	-	-	-	-	-	-	IMPACT=MODIFIER;DISTANCE=3952;STRAND=-1;SYMBOL=IZUMO1;SYMBOL_SOURCE=HGNC;HGNC_ID=28539;NEAREST=IZUMO1
rs4015	19:49253389	T	ENSG00000174951	ENST00000599826	Transcript	downstream_gene_variant	-	-	-	-	-	-	IMPACT=MODIFIER;DISTANCE=2480;STRAND=-1;SYMBOL=FUT1;SYMBOL_SOURCE=HGNC;HGNC_ID=4012;NEAREST=IZUMO1
rs4015	19:49253389	T	ENSG00000174951	ENST00000601931	Transcript	downstream_gene_variant	-	-	-	-	-	-	IMPACT=MODIFIER;DISTANCE=2480;STRAND=-1;SYMBOL=FUT1;SYMBOL_SOURCE=HGNC;HGNC_ID=4012;NEAREST=IZUMO1
rs4015	19:49253389	T	ENSG00000174951	ENST00000601988	Transcript	downstream_gene_variant	-	-	-	-	-	-	IMPACT=MODIFIER;DISTANCE=2480;STRAND=-1;SYMBOL=FUT1;SYMBOL_SOURCE=HGNC;HGNC_ID=4012;NEAREST=IZUMO1
rs4015	19:49253389	T	ENSG00000182264	ENST00000602105	Transcript	upstream_gene_variant	-	-	-	-	-	-	IMPACT=MODIFIER;DISTANCE=3335;STRAND=-1;FLAGS=cds_end_NF;SYMBOL=IZUMO1;SYMBOL_SOURCE=HGNC;HGNC_ID=28539;NEAREST=IZUMO1
rs8103840	19:49254955	T	ENSG00000105550	ENST00000222157	Transcript	upstream_gene_variant	-	-	-	-	-	-	IMPACT=MODIFIER;DISTANCE=4389;STRAND=1;SYMBOL=FGF21;SYMBOL_SOURCE=HGNC;HGNC_ID=3678;NEAREST=FUT1
rs8103840	19:49254955	T	ENSG00000174951	ENST00000310160	Transcript	intron_variant	-	-	-	-	-	-	IMPACT=MODIFIER;STRAND=-1;SYMBOL=FUT1;SYMBOL_SOURCE=HGNC;HGNC_ID=4012;NEAREST=FUT1;INTRON=3/3
rs8103840	19:49254955	T	ENSG00000182264	ENST00000332955	Transcript	upstream_gene_variant	-	-	-	-	-	-	IMPACT=MODIFIER;DISTANCE=4789;STRAND=-1;SYMBOL=IZUMO1;SYMBOL_SOURCE=HGNC;HGNC_ID=28539;NEAREST=FUT1
rs8103840	19:49254955	T	ENSG00000105550	ENST00000593756	Transcript	upstream_gene_variant	-	-	-	-	-	-	IMPACT=MODIFIER;DISTANCE=3861;STRAND=1;SYMBOL=FGF21;SYMBOL_SOURCE=HGNC;HGNC_ID=3678;NEAREST=FUT1
rs8103840	19:49254955	T	ENSG00000174951	ENST00000597220	Transcript	downstream_gene_variant	-	-	-	-	-	-	IMPACT=MODIFIER;DISTANCE=914;STRAND=-1;SYMBOL=FUT1;SYMBOL_SOURCE=HGNC;HGNC_ID=4012;NEAREST=FUT1
rs8103840	19:49254955	T	ENSG00000174951	ENST00000599826	Transcript	downstream_gene_variant	-	-	-	-	-	-	IMPACT=MODIFIER;DISTANCE=914;STRAND=-1;SYMBOL=FUT1;SYMBOL_SOURCE=HGNC;HGNC_ID=4012;NEAREST=FUT1
rs8103840	19:49254955	T	ENSG00000174951	ENST00000601931	Transcript	downstream_gene_variant	-	-	-	-	-	-	IMPACT=MODIFIER;DISTANCE=914;STRAND=-1;SYMBOL=FUT1;SYMBOL_SOURCE=HGNC;HGNC_ID=4012;NEAREST=FUT1
rs8103840	19:49254955	T	ENSG00000174951	ENST00000601988	Transcript	downstream_gene_variant	-	-	-	-	-	-	IMPACT=MODIFIER;DISTANCE=914;STRAND=-1;SYMBOL=FUT1;SYMBOL_SOURCE=HGNC;HGNC_ID=4012;NEAREST=FUT1
rs8103840	19:49254955	T	ENSG00000182264	ENST00000602105	Transcript	upstream_gene_variant	-	-	-	-	-	-	IMPACT=MODIFIER;DISTANCE=4901;STRAND=-1;FLAGS=cds_end_NF;SYMBOL=IZUMO1;SYMBOL_SOURCE=HGNC;HGNC_ID=28539;NEAREST=FUT1
rs838136	19:49256388	C	ENSG00000105550	ENST00000222157	Transcript	upstream_gene_variant	-	-	-	-	-	-	IMPACT=MODIFIER;DISTANCE=2956;STRAND=1;SYMBOL=FGF21;SYMBOL_SOURCE=HGNC;HGNC_ID=3678;NEAREST=FUT1
rs838136	19:49256388	C	ENSG00000174951	ENST00000310160	Transcript	intron_variant	-	-	-	-	-	-	IMPACT=MODIFIER;STRAND=-1;SYMBOL=FUT1;SYMBOL_SOURCE=HGNC;HGNC_ID=4012;NEAREST=FUT1;INTRON=2/3
rs838136	19:49256388	C	ENSG00000105550	ENST00000593756	Transcript	upstream_gene_variant	-	-	-	-	-	-	IMPACT=MODIFIER;DISTANCE=2428;STRAND=1;SYMBOL=FGF21;SYMBOL_SOURCE=HGNC;HGNC_ID=3678;NEAREST=FUT1
rs838136	19:49256388	C	ENSG00000174951	ENST00000597220	Transcript	intron_variant,non_coding_transcript_variant	-	-	-	-	-	-	IMPACT=MODIFIER;STRAND=-1;SYMBOL=FUT1;SYMBOL_SOURCE=HGNC;HGNC_ID=4012;NEAREST=FUT1;INTRON=2/3
rs838136	19:49256388	C	ENSG00000174951	ENST00000599826	Transcript	intron_variant,non_coding_transcript_variant	-	-	-	-	-	-	IMPACT=MODIFIER;STRAND=-1;SYMBOL=FUT1;SYMBOL_SOURCE=HGNC;HGNC_ID=4012;NEAREST=FUT1;INTRON=1/2
rs838136	19:49256388	C	ENSG00000174951	ENST00000601931	Transcript	intron_variant,non_coding_transcript_variant	-	-	-	-	-	-	IMPACT=MODIFIER;STRAND=-1;SYMBOL=FUT1;SYMBOL_SOURCE=HGNC;HGNC_ID=4012;NEAREST=FUT1;INTRON=1/1
rs838136	19:49256388	C	ENSG00000174951	ENST00000601988	Transcript	intron_variant,non_coding_transcript_variant	-	-	-	-	-	-	IMPACT=MODIFIER;STRAND=-1;SYMBOL=FUT1;SYMBOL_SOURCE=HGNC;HGNC_ID=4012;NEAREST=FUT1;INTRON=2/2
rs838134	19:49257739	C	ENSG00000105550	ENST00000222157	Transcript	upstream_gene_variant	-	-	-	-	-	-	IMPACT=MODIFIER;DISTANCE=1605;STRAND=1;SYMBOL=FGF21;SYMBOL_SOURCE=HGNC;HGNC_ID=3678;NEAREST=FUT1
rs838134	19:49257739	C	ENSG00000174951	ENST00000310160	Transcript	intron_variant	-	-	-	-	-	-	IMPACT=MODIFIER;STRAND=-1;SYMBOL=FUT1;SYMBOL_SOURCE=HGNC;HGNC_ID=4012;NEAREST=FUT1;INTRON=1/3
rs838134	19:49257739	C	ENSG00000105550	ENST00000593756	Transcript	upstream_gene_variant	-	-	-	-	-	-	IMPACT=MODIFIER;DISTANCE=1077;STRAND=1;SYMBOL=FGF21;SYMBOL_SOURCE=HGNC;HGNC_ID=3678;NEAREST=FUT1
rs838134	19:49257739	C	ENSG00000174951	ENST00000597220	Transcript	intron_variant,non_coding_transcript_variant	-	-	-	-	-	-	IMPACT=MODIFIER;STRAND=-1;SYMBOL=FUT1;SYMBOL_SOURCE=HGNC;HGNC_ID=4012;NEAREST=FUT1;INTRON=1/3
rs838134	19:49257739	C	ENSG00000174951	ENST00000599826	Transcript	upstream_gene_variant	-	-	-	-	-	-	IMPACT=MODIFIER;DISTANCE=822;STRAND=-1;SYMBOL=FUT1;SYMBOL_SOURCE=HGNC;HGNC_ID=4012;NEAREST=FUT1
rs838134	19:49257739	C	ENSG00000174951	ENST00000601931	Transcript	upstream_gene_variant	-	-	-	-	-	-	IMPACT=MODIFIER;DISTANCE=822;STRAND=-1;SYMBOL=FUT1;SYMBOL_SOURCE=HGNC;HGNC_ID=4012;NEAREST=FUT1
rs838134	19:49257739	C	ENSG00000174951	ENST00000601988	Transcript	intron_variant,non_coding_transcript_variant	-	-	-	-	-	-	IMPACT=MODIFIER;STRAND=-1;SYMBOL=FUT1;SYMBOL_SOURCE=HGNC;HGNC_ID=4012;NEAREST=FUT1;INTRON=1/2
rs838133	19:49259529	G	ENSG00000105550	ENST00000222157	Transcript	synonymous_variant	186	36	12	G	ggA/ggG	-	IMPACT=LOW;STRAND=1;SYMBOL=FGF21;SYMBOL_SOURCE=HGNC;HGNC_ID=3678;NEAREST=FGF21;EXON=1/3
rs838133	19:49259529	G	ENSG00000174951	ENST00000310160	Transcript	upstream_gene_variant	-	-	-	-	-	-	IMPACT=MODIFIER;DISTANCE=882;STRAND=-1;SYMBOL=FUT1;SYMBOL_SOURCE=HGNC;HGNC_ID=4012;NEAREST=FGF21
rs838133	19:49259529	G	ENSG00000105550	ENST00000593756	Transcript	synonymous_variant	608	36	12	G	ggA/ggG	-	IMPACT=LOW;STRAND=1;SYMBOL=FGF21;SYMBOL_SOURCE=HGNC;HGNC_ID=3678;NEAREST=FGF21;EXON=2/4
rs838133	19:49259529	G	ENSG00000174951	ENST00000597220	Transcript	upstream_gene_variant	-	-	-	-	-	-	IMPACT=MODIFIER;DISTANCE=882;STRAND=-1;SYMBOL=FUT1;SYMBOL_SOURCE=HGNC;HGNC_ID=4012;NEAREST=FGF21
rs838133	19:49259529	G	ENSG00000174951	ENST00000599826	Transcript	upstream_gene_variant	-	-	-	-	-	-	IMPACT=MODIFIER;DISTANCE=2612;STRAND=-1;SYMBOL=FUT1;SYMBOL_SOURCE=HGNC;HGNC_ID=4012;NEAREST=FGF21
rs838133	19:49259529	G	ENSG00000174951	ENST00000601931	Transcript	upstream_gene_variant	-	-	-	-	-	-	IMPACT=MODIFIER;DISTANCE=2612;STRAND=-1;SYMBOL=FUT1;SYMBOL_SOURCE=HGNC;HGNC_ID=4012;NEAREST=FGF21
rs838133	19:49259529	G	ENSG00000174951	ENST00000601988	Transcript	upstream_gene_variant	-	-	-	-	-	-	IMPACT=MODIFIER;DISTANCE=882;STRAND=-1;SYMBOL=FUT1;SYMBOL_SOURCE=HGNC;HGNC_ID=4012;NEAREST=FGF21
rs739320	19:49261368	C	ENSG00000105550	ENST00000222157	Transcript	missense_variant	671	521	174	L/P	cTc/cCc	-	IMPACT=MODERATE;STRAND=1;SYMBOL=FGF21;SYMBOL_SOURCE=HGNC;HGNC_ID=3678;NEAREST=FGF21;SIFT=tolerated(0.39);PolyPhen=benign(0);EXON=3/3
rs739320	19:49261368	C	ENSG00000174951	ENST00000310160	Transcript	upstream_gene_variant	-	-	-	-	-	-	IMPACT=MODIFIER;DISTANCE=2721;STRAND=-1;SYMBOL=FUT1;SYMBOL_SOURCE=HGNC;HGNC_ID=4012;NEAREST=FGF21
rs739320	19:49261368	C	ENSG00000105550	ENST00000593756	Transcript	missense_variant	1093	521	174	L/P	cTc/cCc	-	IMPACT=MODERATE;STRAND=1;SYMBOL=FGF21;SYMBOL_SOURCE=HGNC;HGNC_ID=3678;NEAREST=FGF21;SIFT=tolerated(0.39);PolyPhen=benign(0);EXON=4/4
rs739320	19:49261368	C	ENSG00000174951	ENST00000597220	Transcript	upstream_gene_variant	-	-	-	-	-	-	IMPACT=MODIFIER;DISTANCE=2721;STRAND=-1;SYMBOL=FUT1;SYMBOL_SOURCE=HGNC;HGNC_ID=4012;NEAREST=FGF21
rs739320	19:49261368	C	ENSG00000174951	ENST00000599826	Transcript	upstream_gene_variant	-	-	-	-	-	-	IMPACT=MODIFIER;DISTANCE=4451;STRAND=-1;SYMBOL=FUT1;SYMBOL_SOURCE=HGNC;HGNC_ID=4012;NEAREST=FGF21
rs739320	19:49261368	C	ENSG00000174951	ENST00000601931	Transcript	upstream_gene_variant	-	-	-	-	-	-	IMPACT=MODIFIER;DISTANCE=4451;STRAND=-1;SYMBOL=FUT1;SYMBOL_SOURCE=HGNC;HGNC_ID=4012;NEAREST=FGF21
rs739320	19:49261368	C	ENSG00000174951	ENST00000601988	Transcript	upstream_gene_variant	-	-	-	-	-	-	IMPACT=MODIFIER;DISTANCE=2721;STRAND=-1;SYMBOL=FUT1;SYMBOL_SOURCE=HGNC;HGNC_ID=4012;NEAREST=FGF21
rs2081194	19:49263477	C	ENSG00000105550	ENST00000222157	Transcript	downstream_gene_variant	-	-	-	-	-	-	IMPACT=MODIFIER;DISTANCE=1897;STRAND=1;SYMBOL=FGF21;SYMBOL_SOURCE=HGNC;HGNC_ID=3678;NEAREST=FGF21
rs2081194	19:49263477	C	ENSG00000174951	ENST00000310160	Transcript	upstream_gene_variant	-	-	-	-	-	-	IMPACT=MODIFIER;DISTANCE=4830;STRAND=-1;SYMBOL=FUT1;SYMBOL_SOURCE=HGNC;HGNC_ID=4012;NEAREST=FGF21
rs2081194	19:49263477	C	ENSG00000105550	ENST00000593756	Transcript	downstream_gene_variant	-	-	-	-	-	-	IMPACT=MODIFIER;DISTANCE=1890;STRAND=1;SYMBOL=FGF21;SYMBOL_SOURCE=HGNC;HGNC_ID=3678;NEAREST=FGF21
rs2081194	19:49263477	C	ENSG00000174951	ENST00000597220	Transcript	upstream_gene_variant	-	-	-	-	-	-	IMPACT=MODIFIER;DISTANCE=4830;STRAND=-1;SYMBOL=FUT1;SYMBOL_SOURCE=HGNC;HGNC_ID=4012;NEAREST=FGF21
rs2081194	19:49263477	C	ENSG00000174951	ENST00000601988	Transcript	upstream_gene_variant	-	-	-	-	-	-	IMPACT=MODIFIER;DISTANCE=4830;STRAND=-1;SYMBOL=FUT1;SYMBOL_SOURCE=HGNC;HGNC_ID=4012;NEAREST=FGF21
rs9749209	19:49264547	G	ENSG00000105550	ENST00000222157	Transcript	downstream_gene_variant	-	-	-	-	-	-	IMPACT=MODIFIER;DISTANCE=2967;STRAND=1;SYMBOL=FGF21;SYMBOL_SOURCE=HGNC;HGNC_ID=3678;NEAREST=FGF21
rs9749209	19:49264547	G	ENSG00000105550	ENST00000593756	Transcript	downstream_gene_variant	-	-	-	-	-	-	IMPACT=MODIFIER;DISTANCE=2960;STRAND=1;SYMBOL=FGF21;SYMBOL_SOURCE=HGNC;HGNC_ID=3678;NEAREST=FGF21
rs499765	19:49266390	G	ENSG00000105550	ENST00000222157	Transcript	downstream_gene_variant	-	-	-	-	-	-	IMPACT=MODIFIER;DISTANCE=4810;STRAND=1;SYMBOL=FGF21;SYMBOL_SOURCE=HGNC;HGNC_ID=3678;NEAREST=FGF21
rs499765	19:49266390	G	ENSG00000105550	ENST00000593756	Transcript	downstream_gene_variant	-	-	-	-	-	-	IMPACT=MODIFIER;DISTANCE=4803;STRAND=1;SYMBOL=FGF21;SYMBOL_SOURCE=HGNC;HGNC_ID=3678;NEAREST=FGF21
rs62132800	19:49266806	T	-	-	-	intergenic_variant	-	-	-	-	-	-	IMPACT=MODIFIER;NEAREST=FGF21
rs637174	19:49266936	A	-	-	-	intergenic_variant	-	-	-	-	-	-	IMPACT=MODIFIER;NEAREST=FGF21
rs62132801	19:49267882	T	-	-	-	intergenic_variant	-	-	-	-	-	-	IMPACT=MODIFIER;NEAREST=FGF21
rs837629	19:49268852	G	-	-	-	intergenic_variant	-	-	-	-	-	-	IMPACT=MODIFIER;NEAREST=FGF21
rs669789	19:49269559	C	-	-	-	intergenic_variant	-	-	-	-	-	-	IMPACT=MODIFIER;NEAREST=FGF21
rs28567372	19:49270635	G	-	-	-	intergenic_variant	-	-	-	-	-	-	IMPACT=MODIFIER;NEAREST=FGF21
rs62132802	19:49270872	T	-	-	-	intergenic_variant	-	-	-	-	-	-	IMPACT=MODIFIER;NEAREST=FGF21
rs62132804	19:49272461	A	-	ENSR00000382481	RegulatoryFeature	regulatory_region_variant	-	-	-	-	-	-	IMPACT=MODIFIER;NEAREST=FGF21;BIOTYPE=CTCF_binding_site
rs62132804	19:49272461	A	-	-	-	intergenic_variant	-	-	-	-	-	-	IMPACT=MODIFIER;NEAREST=FGF21
rs604740	19:49273213	C	-	ENSR00000382481	RegulatoryFeature	regulatory_region_variant	-	-	-	-	-	-	IMPACT=MODIFIER;NEAREST=FGF21;BIOTYPE=CTCF_binding_site
rs604740	19:49273213	C	-	-	-	intergenic_variant	-	-	-	-	-	-	IMPACT=MODIFIER;NEAREST=FGF21
rs62132806	19:49273843	A	-	ENSR00000382481	RegulatoryFeature	regulatory_region_variant	-	-	-	-	-	-	IMPACT=MODIFIER;NEAREST=FGF21;BIOTYPE=CTCF_binding_site
rs62132806	19:49273843	A	-	ENSR00000382482	RegulatoryFeature	regulatory_region_variant	-	-	-	-	-	-	IMPACT=MODIFIER;NEAREST=FGF21;BIOTYPE=open_chromatin_region
rs62132806	19:49273843	A	-	-	-	intergenic_variant	-	-	-	-	-	-	IMPACT=MODIFIER;NEAREST=FGF21
rs633236	19:49274975	T	-	-	-	intergenic_variant	-	-	-	-	-	-	IMPACT=MODIFIER;NEAREST=FGF21
rs62132807	19:49275573	A	-	-	-	intergenic_variant	-	-	-	-	-	-	IMPACT=MODIFIER;NEAREST=FGF21
rs58150062	19:49278303	A	-	-	-	intergenic_variant	-	-	-	-	-	-	IMPACT=MODIFIER;NEAREST=FGF21
rs4802503	19:49279628	A	-	-	-	intergenic_variant	-	-	-	-	-	-	IMPACT=MODIFIER;NEAREST=FGF21
rs4665972	2:27598097	C	ENSG00000115234	ENST00000233575	Transcript	intron_variant	-	-	-	-	-	-	IMPACT=MODIFIER;STRAND=1;SYMBOL=SNX17;SYMBOL_SOURCE=HGNC;HGNC_ID=14979;NEAREST=SNX17;INTRON=9/14
rs4665972	2:27598097	C	ENSG00000163795	ENST00000323703	Transcript	downstream_gene_variant	-	-	-	-	-	-	IMPACT=MODIFIER;DISTANCE=2001;STRAND=-1;SYMBOL=ZNF513;SYMBOL_SOURCE=HGNC;HGNC_ID=26498;NEAREST=SNX17
rs4665972	2:27598097	C	ENSG00000115211	ENST00000347454	Transcript	upstream_gene_variant	-	-	-	-	-	-	IMPACT=MODIFIER;DISTANCE=4744;STRAND=-1;SYMBOL=EIF2B4;SYMBOL_SOURCE=HGNC;HGNC_ID=3260;NEAREST=SNX17
rs4665972	2:27598097	C	ENSG00000115211	ENST00000405940	Transcript	upstream_gene_variant	-	-	-	-	-	-	IMPACT=MODIFIER;DISTANCE=4915;STRAND=-1;SYMBOL=EIF2B4;SYMBOL_SOURCE=HGNC;HGNC_ID=3260;NEAREST=SNX17
rs4665972	2:27598097	C	ENSG00000163795	ENST00000407879	Transcript	downstream_gene_variant	-	-	-	-	-	-	IMPACT=MODIFIER;DISTANCE=2005;STRAND=-1;SYMBOL=ZNF513;SYMBOL_SOURCE=HGNC;HGNC_ID=26498;NEAREST=SNX17
rs4665972	2:27598097	C	ENSG00000115211	ENST00000418146	Transcript	upstream_gene_variant	-	-	-	-	-	-	IMPACT=MODIFIER;DISTANCE=4901;STRAND=-1;SYMBOL=EIF2B4;SYMBOL_SOURCE=HGNC;HGNC_ID=3260;NEAREST=SNX17
rs4665972	2:27598097	C	ENSG00000115234	ENST00000427123	Transcript	intron_variant,NMD_transcript_variant	-	-	-	-	-	-	IMPACT=MODIFIER;STRAND=1;SYMBOL=SNX17;SYMBOL_SOURCE=HGNC;HGNC_ID=14979;NEAREST=SNX17;INTRON=10/15
rs4665972	2:27598097	C	ENSG00000163795	ENST00000436006	Transcript	downstream_gene_variant	-	-	-	-	-	-	IMPACT=MODIFIER;DISTANCE=3501;STRAND=-1;FLAGS=cds_end_NF;SYMBOL=ZNF513;SYMBOL_SOURCE=HGNC;HGNC_ID=26498;NEAREST=SNX17
rs4665972	2:27598097	C	ENSG00000115234	ENST00000440760	Transcript	intron_variant,NMD_transcript_variant	-	-	-	-	-	-	IMPACT=MODIFIER;STRAND=1;SYMBOL=SNX17;SYMBOL_SOURCE=HGNC;HGNC_ID=14979;NEAREST=SNX17;INTRON=8/13
rs4665972	2:27598097	C	ENSG00000115211	ENST00000445933	Transcript	upstream_gene_variant	-	-	-	-	-	-	IMPACT=MODIFIER;DISTANCE=4896;STRAND=-1;SYMBOL=EIF2B4;SYMBOL_SOURCE=HGNC;HGNC_ID=3260;NEAREST=SNX17
rs4665972	2:27598097	C	ENSG00000115234	ENST00000453453	Transcript	intron_variant,NMD_transcript_variant	-	-	-	-	-	-	IMPACT=MODIFIER;STRAND=1;SYMBOL=SNX17;SYMBOL_SOURCE=HGNC;HGNC_ID=14979;NEAREST=SNX17;INTRON=6/11
rs4665972	2:27598097	C	ENSG00000115211	ENST00000462749	Transcript	upstream_gene_variant	-	-	-	-	-	-	IMPACT=MODIFIER;DISTANCE=4904;STRAND=-1;SYMBOL=EIF2B4;SYMBOL_SOURCE=HGNC;HGNC_ID=3260;NEAREST=SNX17
rs4665972	2:27598097	C	ENSG00000115234	ENST00000464279	Transcript	downstream_gene_variant	-	-	-	-	-	-	IMPACT=MODIFIER;DISTANCE=1791;STRAND=1;SYMBOL=SNX17;SYMBOL_SOURCE=HGNC;HGNC_ID=14979;NEAREST=SNX17
rs4665972	2:27598097	C	ENSG00000115211	ENST00000475582	Transcript	upstream_gene_variant	-	-	-	-	-	-	IMPACT=MODIFIER;DISTANCE=4907;STRAND=-1;SYMBOL=EIF2B4;SYMBOL_SOURCE=HGNC;HGNC_ID=3260;NEAREST=SNX17
rs4665972	2:27598097	C	ENSG00000115234	ENST00000484886	Transcript	downstream_gene_variant	-	-	-	-	-	-	IMPACT=MODIFIER;DISTANCE=3586;STRAND=1;SYMBOL=SNX17;SYMBOL_SOURCE=HGNC;HGNC_ID=14979;NEAREST=SNX17
rs4665972	2:27598097	C	ENSG00000115234	ENST00000489402	Transcript	downstream_gene_variant	-	-	-	-	-	-	IMPACT=MODIFIER;DISTANCE=2101;STRAND=1;SYMBOL=SNX17;SYMBOL_SOURCE=HGNC;HGNC_ID=14979;NEAREST=SNX17
rs4665972	2:27598097	C	ENSG00000163795	ENST00000491924	Transcript	downstream_gene_variant	-	-	-	-	-	-	IMPACT=MODIFIER;DISTANCE=2494;STRAND=-1;SYMBOL=ZNF513;SYMBOL_SOURCE=HGNC;HGNC_ID=26498;NEAREST=SNX17
rs4665972	2:27598097	C	ENSG00000115211	ENST00000493344	Transcript	upstream_gene_variant	-	-	-	-	-	-	IMPACT=MODIFIER;DISTANCE=4904;STRAND=-1;SYMBOL=EIF2B4;SYMBOL_SOURCE=HGNC;HGNC_ID=3260;NEAREST=SNX17
rs4665972	2:27598097	C	ENSG00000115234	ENST00000493711	Transcript	intron_variant,non_coding_transcript_variant	-	-	-	-	-	-	IMPACT=MODIFIER;STRAND=1;SYMBOL=SNX17;SYMBOL_SOURCE=HGNC;HGNC_ID=14979;NEAREST=SNX17;INTRON=2/2
rs4665972	2:27598097	C	ENSG00000115234	ENST00000494893	Transcript	intron_variant,non_coding_transcript_variant	-	-	-	-	-	-	IMPACT=MODIFIER;STRAND=1;SYMBOL=SNX17;SYMBOL_SOURCE=HGNC;HGNC_ID=14979;NEAREST=SNX17;INTRON=7/7
rs4665972	2:27598097	C	ENSG00000115234	ENST00000537606	Transcript	intron_variant	-	-	-	-	-	-	IMPACT=MODIFIER;STRAND=1;SYMBOL=SNX17;SYMBOL_SOURCE=HGNC;HGNC_ID=14979;NEAREST=SNX17;INTRON=8/13
rs4665972	2:27598097	C	ENSG00000115234	ENST00000542478	Transcript	intron_variant	-	-	-	-	-	-	IMPACT=MODIFIER;STRAND=1;SYMBOL=SNX17;SYMBOL_SOURCE=HGNC;HGNC_ID=14979;NEAREST=SNX17;INTRON=9/14
rs4665972	2:27598097	C	ENSG00000115234	ENST00000543024	Transcript	intron_variant	-	-	-	-	-	-	IMPACT=MODIFIER;STRAND=1;SYMBOL=SNX17;SYMBOL_SOURCE=HGNC;HGNC_ID=14979;NEAREST=SNX17;INTRON=7/12
rs1728918	2:27635463	G	ENSG00000115241	ENST00000344034	Transcript	upstream_gene_variant	-	-	-	-	-	-	IMPACT=MODIFIER;DISTANCE=2909;STRAND=-1;SYMBOL=PPM1G;SYMBOL_SOURCE=HGNC;HGNC_ID=9278;NEAREST=PPM1G
rs1728918	2:27635463	G	ENSG00000115241	ENST00000350803	Transcript	upstream_gene_variant	-	-	-	-	-	-	IMPACT=MODIFIER;DISTANCE=3014;STRAND=-1;SYMBOL=PPM1G;SYMBOL_SOURCE=HGNC;HGNC_ID=9278;NEAREST=PPM1G
rs1728918	2:27635463	G	ENSG00000115241	ENST00000472077	Transcript	upstream_gene_variant	-	-	-	-	-	-	IMPACT=MODIFIER;DISTANCE=3041;STRAND=-1;SYMBOL=PPM1G;SYMBOL_SOURCE=HGNC;HGNC_ID=9278;NEAREST=PPM1G
rs1728918	2:27635463	G	ENSG00000115241	ENST00000484925	Transcript	upstream_gene_variant	-	-	-	-	-	-	IMPACT=MODIFIER;DISTANCE=3021;STRAND=-1;SYMBOL=PPM1G;SYMBOL_SOURCE=HGNC;HGNC_ID=9278;NEAREST=PPM1G
rs67086575	2:27686480	G	ENSG00000138002	ENST00000260570	Transcript	intron_variant	-	-	-	-	-	-	IMPACT=MODIFIER;STRAND=-1;SYMBOL=IFT172;SYMBOL_SOURCE=HGNC;HGNC_ID=30391;NEAREST=IFT172;INTRON=18/47
rs67086575	2:27686480	G	ENSG00000138002	ENST00000476693	Transcript	upstream_gene_variant	-	-	-	-	-	-	IMPACT=MODIFIER;DISTANCE=4500;STRAND=-1;SYMBOL=IFT172;SYMBOL_SOURCE=HGNC;HGNC_ID=30391;NEAREST=IFT172
rs67086575	2:27686480	G	ENSG00000138002	ENST00000489492	Transcript	downstream_gene_variant	-	-	-	-	-	-	IMPACT=MODIFIER;DISTANCE=1589;STRAND=-1;SYMBOL=IFT172;SYMBOL_SOURCE=HGNC;HGNC_ID=30391;NEAREST=IFT172
rs67086575	2:27686480	G	ENSG00000138002	ENST00000507184	Transcript	intron_variant,non_coding_transcript_variant	-	-	-	-	-	-	IMPACT=MODIFIER;STRAND=-1;SYMBOL=IFT172;SYMBOL_SOURCE=HGNC;HGNC_ID=30391;NEAREST=IFT172;INTRON=19/47
rs1260326	2:27730940	C	ENSG00000084734	ENST00000264717	Transcript	missense_variant,splice_region_variant	1400	1337	446	L/P	cTg/cCg	-	IMPACT=MODERATE;STRAND=1;SYMBOL=GCKR;SYMBOL_SOURCE=HGNC;HGNC_ID=4196;NEAREST=GCKR;SIFT=tolerated(1);PolyPhen=benign(0);EXON=15/19
rs1260326	2:27730940	C	ENSG00000084734	ENST00000411584	Transcript	missense_variant,splice_region_variant	439	440	147	L/P	cTg/cCg	-	IMPACT=MODERATE;STRAND=1;FLAGS=cds_start_NF;SYMBOL=GCKR;SYMBOL_SOURCE=HGNC;HGNC_ID=4196;NEAREST=GCKR;SIFT=tolerated(1);PolyPhen=benign(0);EXON=5/7
rs1260326	2:27730940	C	ENSG00000084734	ENST00000424318	Transcript	missense_variant,splice_region_variant	1327	767	256	L/P	cTg/cCg	-	IMPACT=MODERATE;STRAND=1;SYMBOL=GCKR;SYMBOL_SOURCE=HGNC;HGNC_ID=4196;NEAREST=GCKR;SIFT=tolerated(1);PolyPhen=benign(0);EXON=14/18
rs1260326	2:27730940	C	ENSG00000084734	ENST00000472290	Transcript	downstream_gene_variant	-	-	-	-	-	-	IMPACT=MODIFIER;DISTANCE=1182;STRAND=1;SYMBOL=GCKR;SYMBOL_SOURCE=HGNC;HGNC_ID=4196;NEAREST=GCKR
rs1260326	2:27730940	C	ENSG00000084734	ENST00000478147	Transcript	splice_region_variant,non_coding_transcript_exon_variant	534	-	-	-	-	-	IMPACT=LOW;STRAND=1;SYMBOL=GCKR;SYMBOL_SOURCE=HGNC;HGNC_ID=4196;NEAREST=GCKR;EXON=2/3
rs3817588	2:27731212	C	ENSG00000084734	ENST00000264717	Transcript	intron_variant	-	-	-	-	-	-	IMPACT=MODIFIER;STRAND=1;SYMBOL=GCKR;SYMBOL_SOURCE=HGNC;HGNC_ID=4196;NEAREST=GCKR;INTRON=16/18
rs3817588	2:27731212	C	ENSG00000084734	ENST00000411584	Transcript	intron_variant	-	-	-	-	-	-	IMPACT=MODIFIER;STRAND=1;FLAGS=cds_start_NF;SYMBOL=GCKR;SYMBOL_SOURCE=HGNC;HGNC_ID=4196;NEAREST=GCKR;INTRON=6/6
rs3817588	2:27731212	C	ENSG00000084734	ENST00000424318	Transcript	intron_variant	-	-	-	-	-	-	IMPACT=MODIFIER;STRAND=1;SYMBOL=GCKR;SYMBOL_SOURCE=HGNC;HGNC_ID=4196;NEAREST=GCKR;INTRON=15/17
rs3817588	2:27731212	C	ENSG00000084734	ENST00000472290	Transcript	downstream_gene_variant	-	-	-	-	-	-	IMPACT=MODIFIER;DISTANCE=1454;STRAND=1;SYMBOL=GCKR;SYMBOL_SOURCE=HGNC;HGNC_ID=4196;NEAREST=GCKR
rs3817588	2:27731212	C	ENSG00000084734	ENST00000478147	Transcript	downstream_gene_variant	-	-	-	-	-	-	IMPACT=MODIFIER;DISTANCE=134;STRAND=1;SYMBOL=GCKR;SYMBOL_SOURCE=HGNC;HGNC_ID=4196;NEAREST=GCKR
rs6547692	2:27734972	A	ENSG00000084734	ENST00000264717	Transcript	intron_variant	-	-	-	-	-	-	IMPACT=MODIFIER;STRAND=1;SYMBOL=GCKR;SYMBOL_SOURCE=HGNC;HGNC_ID=4196;NEAREST=GCKR;INTRON=16/18
rs6547692	2:27734972	A	ENSG00000084734	ENST00000411584	Transcript	downstream_gene_variant	-	-	-	-	-	-	IMPACT=MODIFIER;DISTANCE=2314;STRAND=1;FLAGS=cds_start_NF;SYMBOL=GCKR;SYMBOL_SOURCE=HGNC;HGNC_ID=4196;NEAREST=GCKR
rs6547692	2:27734972	A	ENSG00000084734	ENST00000424318	Transcript	intron_variant	-	-	-	-	-	-	IMPACT=MODIFIER;STRAND=1;SYMBOL=GCKR;SYMBOL_SOURCE=HGNC;HGNC_ID=4196;NEAREST=GCKR;INTRON=15/17
rs6547692	2:27734972	A	ENSG00000084734	ENST00000478147	Transcript	downstream_gene_variant	-	-	-	-	-	-	IMPACT=MODIFIER;DISTANCE=3894;STRAND=1;SYMBOL=GCKR;SYMBOL_SOURCE=HGNC;HGNC_ID=4196;NEAREST=GCKR
rs780096	2:27741072	G	ENSG00000084734	ENST00000264717	Transcript	intron_variant	-	-	-	-	-	-	IMPACT=MODIFIER;STRAND=1;SYMBOL=GCKR;SYMBOL_SOURCE=HGNC;HGNC_ID=4196;NEAREST=GCKR;INTRON=16/18
rs780096	2:27741072	G	ENSG00000084734	ENST00000424318	Transcript	intron_variant	-	-	-	-	-	-	IMPACT=MODIFIER;STRAND=1;SYMBOL=GCKR;SYMBOL_SOURCE=HGNC;HGNC_ID=4196;NEAREST=GCKR;INTRON=15/17
rs780095	2:27741105	G	ENSG00000084734	ENST00000264717	Transcript	intron_variant	-	-	-	-	-	-	IMPACT=MODIFIER;STRAND=1;SYMBOL=GCKR;SYMBOL_SOURCE=HGNC;HGNC_ID=4196;NEAREST=GCKR;INTRON=16/18
rs780095	2:27741105	G	ENSG00000084734	ENST00000424318	Transcript	intron_variant	-	-	-	-	-	-	IMPACT=MODIFIER;STRAND=1;SYMBOL=GCKR;SYMBOL_SOURCE=HGNC;HGNC_ID=4196;NEAREST=GCKR;INTRON=15/17
rs780094	2:27741237	C	ENSG00000084734	ENST00000264717	Transcript	intron_variant	-	-	-	-	-	-	IMPACT=MODIFIER;STRAND=1;SYMBOL=GCKR;SYMBOL_SOURCE=HGNC;HGNC_ID=4196;NEAREST=GCKR;INTRON=16/18
rs780094	2:27741237	C	ENSG00000084734	ENST00000424318	Transcript	intron_variant	-	-	-	-	-	-	IMPACT=MODIFIER;STRAND=1;SYMBOL=GCKR;SYMBOL_SOURCE=HGNC;HGNC_ID=4196;NEAREST=GCKR;INTRON=15/17
rs780093	2:27742603	C	ENSG00000084734	ENST00000264717	Transcript	intron_variant	-	-	-	-	-	-	IMPACT=MODIFIER;STRAND=1;SYMBOL=GCKR;SYMBOL_SOURCE=HGNC;HGNC_ID=4196;NEAREST=GCKR;INTRON=17/18
rs780093	2:27742603	C	ENSG00000084734	ENST00000424318	Transcript	intron_variant	-	-	-	-	-	-	IMPACT=MODIFIER;STRAND=1;SYMBOL=GCKR;SYMBOL_SOURCE=HGNC;HGNC_ID=4196;NEAREST=GCKR;INTRON=16/17
rs780092	2:27743154	G	ENSG00000084734	ENST00000264717	Transcript	intron_variant	-	-	-	-	-	-	IMPACT=MODIFIER;STRAND=1;SYMBOL=GCKR;SYMBOL_SOURCE=HGNC;HGNC_ID=4196;NEAREST=GCKR;INTRON=17/18
rs780092	2:27743154	G	ENSG00000084734	ENST00000424318	Transcript	intron_variant	-	-	-	-	-	-	IMPACT=MODIFIER;STRAND=1;SYMBOL=GCKR;SYMBOL_SOURCE=HGNC;HGNC_ID=4196;NEAREST=GCKR;INTRON=16/17
rs814295	2:27743215	G	ENSG00000084734	ENST00000264717	Transcript	intron_variant	-	-	-	-	-	-	IMPACT=MODIFIER;STRAND=1;SYMBOL=GCKR;SYMBOL_SOURCE=HGNC;HGNC_ID=4196;NEAREST=GCKR;INTRON=17/18
rs814295	2:27743215	G	ENSG00000084734	ENST00000424318	Transcript	intron_variant	-	-	-	-	-	-	IMPACT=MODIFIER;STRAND=1;SYMBOL=GCKR;SYMBOL_SOURCE=HGNC;HGNC_ID=4196;NEAREST=GCKR;INTRON=16/17
rs74928908	2:27744089	G	ENSG00000084734	ENST00000264717	Transcript	intron_variant	-	-	-	-	-	-	IMPACT=MODIFIER;STRAND=1;SYMBOL=GCKR;SYMBOL_SOURCE=HGNC;HGNC_ID=4196;NEAREST=GCKR;INTRON=17/18
rs74928908	2:27744089	G	ENSG00000084734	ENST00000424318	Transcript	intron_variant	-	-	-	-	-	-	IMPACT=MODIFIER;STRAND=1;SYMBOL=GCKR;SYMBOL_SOURCE=HGNC;HGNC_ID=4196;NEAREST=GCKR;INTRON=16/17
rs1260334	2:27748597	A	ENSG00000084734	ENST00000264717	Transcript	downstream_gene_variant	-	-	-	-	-	-	IMPACT=MODIFIER;DISTANCE=2046;STRAND=1;SYMBOL=GCKR;SYMBOL_SOURCE=HGNC;HGNC_ID=4196;NEAREST=AC109829.1
rs1260334	2:27748597	A	ENSG00000084734	ENST00000424318	Transcript	downstream_gene_variant	-	-	-	-	-	-	IMPACT=MODIFIER;DISTANCE=2043;STRAND=1;SYMBOL=GCKR;SYMBOL_SOURCE=HGNC;HGNC_ID=4196;NEAREST=AC109829.1
rs1260333	2:27748624	G	ENSG00000084734	ENST00000264717	Transcript	downstream_gene_variant	-	-	-	-	-	-	IMPACT=MODIFIER;DISTANCE=2073;STRAND=1;SYMBOL=GCKR;SYMBOL_SOURCE=HGNC;HGNC_ID=4196;NEAREST=AC109829.1
rs1260333	2:27748624	G	ENSG00000084734	ENST00000424318	Transcript	downstream_gene_variant	-	-	-	-	-	-	IMPACT=MODIFIER;DISTANCE=2070;STRAND=1;SYMBOL=GCKR;SYMBOL_SOURCE=HGNC;HGNC_ID=4196;NEAREST=AC109829.1
rs1313566	2:27748904	A	ENSG00000084734	ENST00000264717	Transcript	downstream_gene_variant	-	-	-	-	-	-	IMPACT=MODIFIER;DISTANCE=2353;STRAND=1;SYMBOL=GCKR;SYMBOL_SOURCE=HGNC;HGNC_ID=4196;NEAREST=AC109829.1
rs1313566	2:27748904	A	ENSG00000084734	ENST00000424318	Transcript	downstream_gene_variant	-	-	-	-	-	-	IMPACT=MODIFIER;DISTANCE=2350;STRAND=1;SYMBOL=GCKR;SYMBOL_SOURCE=HGNC;HGNC_ID=4196;NEAREST=AC109829.1
rs6744393	2:27750139	T	ENSG00000084734	ENST00000264717	Transcript	downstream_gene_variant	-	-	-	-	-	-	IMPACT=MODIFIER;DISTANCE=3588;STRAND=1;SYMBOL=GCKR;SYMBOL_SOURCE=HGNC;HGNC_ID=4196;NEAREST=AC109829.1
rs6744393	2:27750139	T	ENSG00000084734	ENST00000424318	Transcript	downstream_gene_variant	-	-	-	-	-	-	IMPACT=MODIFIER;DISTANCE=3585;STRAND=1;SYMBOL=GCKR;SYMBOL_SOURCE=HGNC;HGNC_ID=4196;NEAREST=AC109829.1
rs2950835	2:27750545	G	ENSG00000084734	ENST00000264717	Transcript	downstream_gene_variant	-	-	-	-	-	-	IMPACT=MODIFIER;DISTANCE=3994;STRAND=1;SYMBOL=GCKR;SYMBOL_SOURCE=HGNC;HGNC_ID=4196;NEAREST=AC109829.1
rs2950835	2:27750545	G	ENSG00000084734	ENST00000424318	Transcript	downstream_gene_variant	-	-	-	-	-	-	IMPACT=MODIFIER;DISTANCE=3991;STRAND=1;SYMBOL=GCKR;SYMBOL_SOURCE=HGNC;HGNC_ID=4196;NEAREST=AC109829.1
rs2911711	2:27750546	A	ENSG00000084734	ENST00000264717	Transcript	downstream_gene_variant	-	-	-	-	-	-	IMPACT=MODIFIER;DISTANCE=3995;STRAND=1;SYMBOL=GCKR;SYMBOL_SOURCE=HGNC;HGNC_ID=4196;NEAREST=AC109829.1
rs2911711	2:27750546	A	ENSG00000084734	ENST00000424318	Transcript	downstream_gene_variant	-	-	-	-	-	-	IMPACT=MODIFIER;DISTANCE=3992;STRAND=1;SYMBOL=GCKR;SYMBOL_SOURCE=HGNC;HGNC_ID=4196;NEAREST=AC109829.1
rs78680773	2:27751562	C	-	-	-	intergenic_variant	-	-	-	-	-	-	IMPACT=MODIFIER;NEAREST=AC109829.1
rs6753534	2:27752871	T	-	-	-	intergenic_variant	-	-	-	-	-	-	IMPACT=MODIFIER;NEAREST=AC109829.1
rs4665985	2:27753878	C	-	-	-	intergenic_variant	-	-	-	-	-	-	IMPACT=MODIFIER;NEAREST=AC109829.1
rs4665987	2:27755825	A	ENSG00000233438	ENST00000447166	Transcript	upstream_gene_variant	-	-	-	-	-	-	IMPACT=MODIFIER;DISTANCE=4428;STRAND=1;FLAGS=cds_end_NF;SYMBOL=AC109829.1;SYMBOL_SOURCE=Clone_based_vega_gene;NEAREST=AC109829.1
rs4665988	2:27761436	A	ENSG00000233438	ENST00000447166	Transcript	intron_variant	-	-	-	-	-	-	IMPACT=MODIFIER;STRAND=1;FLAGS=cds_end_NF;SYMBOL=AC109829.1;SYMBOL_SOURCE=Clone_based_vega_gene;NEAREST=AC109829.1;INTRON=1/4
rs12473139	2:27765587	C	ENSG00000233438	ENST00000447166	Transcript	intron_variant	-	-	-	-	-	-	IMPACT=MODIFIER;STRAND=1;FLAGS=cds_end_NF;SYMBOL=AC109829.1;SYMBOL_SOURCE=Clone_based_vega_gene;NEAREST=AC109829.1;INTRON=1/4
rs4665991	2:27766284	A	ENSG00000233438	ENST00000447166	Transcript	intron_variant	-	-	-	-	-	-	IMPACT=MODIFIER;STRAND=1;FLAGS=cds_end_NF;SYMBOL=AC109829.1;SYMBOL_SOURCE=Clone_based_vega_gene;NEAREST=AC109829.1;INTRON=1/4
rs12995461	2:27778167	C	ENSG00000233438	ENST00000447166	Transcript	intron_variant	-	-	-	-	-	-	IMPACT=MODIFIER;STRAND=1;FLAGS=cds_end_NF;SYMBOL=AC109829.1;SYMBOL_SOURCE=Clone_based_vega_gene;NEAREST=AC109829.1;INTRON=1/4
rs10169065	2:27778560	G	ENSG00000233438	ENST00000447166	Transcript	intron_variant	-	-	-	-	-	-	IMPACT=MODIFIER;STRAND=1;FLAGS=cds_end_NF;SYMBOL=AC109829.1;SYMBOL_SOURCE=Clone_based_vega_gene;NEAREST=AC109829.1;INTRON=1/4
rs10179872	2:27778572	A	ENSG00000233438	ENST00000447166	Transcript	intron_variant	-	-	-	-	-	-	IMPACT=MODIFIER;STRAND=1;FLAGS=cds_end_NF;SYMBOL=AC109829.1;SYMBOL_SOURCE=Clone_based_vega_gene;NEAREST=AC109829.1;INTRON=1/4
rs4665382	2:27783801	C	ENSG00000233438	ENST00000447166	Transcript	intron_variant	-	-	-	-	-	-	IMPACT=MODIFIER;STRAND=1;FLAGS=cds_end_NF;SYMBOL=AC109829.1;SYMBOL_SOURCE=Clone_based_vega_gene;NEAREST=C2orf16;INTRON=1/4
rs7570476	2:27784658	T	ENSG00000233438	ENST00000447166	Transcript	intron_variant	-	-	-	-	-	-	IMPACT=MODIFIER;STRAND=1;FLAGS=cds_end_NF;SYMBOL=AC109829.1;SYMBOL_SOURCE=Clone_based_vega_gene;NEAREST=C2orf16;INTRON=1/4
rs10208529	2:27786188	T	ENSG00000233438	ENST00000447166	Transcript	intron_variant	-	-	-	-	-	-	IMPACT=MODIFIER;STRAND=1;FLAGS=cds_end_NF;SYMBOL=AC109829.1;SYMBOL_SOURCE=Clone_based_vega_gene;NEAREST=C2orf16;INTRON=1/4
rs4665383	2:27791555	G	ENSG00000233438	ENST00000447166	Transcript	downstream_gene_variant	-	-	-	-	-	-	IMPACT=MODIFIER;DISTANCE=1544;STRAND=1;FLAGS=cds_end_NF;SYMBOL=AC109829.1;SYMBOL_SOURCE=Clone_based_vega_gene;NEAREST=C2orf16
rs7577311	2:27793921	T	ENSG00000233438	ENST00000447166	Transcript	downstream_gene_variant	-	-	-	-	-	-	IMPACT=MODIFIER;DISTANCE=3910;STRAND=1;FLAGS=cds_end_NF;SYMBOL=AC109829.1;SYMBOL_SOURCE=Clone_based_vega_gene;NEAREST=C2orf16
rs1919127	2:27801493	C	ENSG00000243943	ENST00000355467	Transcript	upstream_gene_variant	-	-	-	-	-	-	IMPACT=MODIFIER;DISTANCE=4404;STRAND=1;SYMBOL=ZNF512;SYMBOL_SOURCE=HGNC;HGNC_ID=29380;NEAREST=C2orf16
rs1919127	2:27801493	C	ENSG00000243943	ENST00000379717	Transcript	upstream_gene_variant	-	-	-	-	-	-	IMPACT=MODIFIER;DISTANCE=4404;STRAND=1;SYMBOL=ZNF512;SYMBOL_SOURCE=HGNC;HGNC_ID=29380;NEAREST=C2orf16
rs1919127	2:27801493	C	ENSG00000221531	ENST00000408604	Transcript	downstream_gene_variant	-	-	-	-	-	-	IMPACT=MODIFIER;DISTANCE=3263;STRAND=-1;SYMBOL=AC074091.1;SYMBOL_SOURCE=Clone_based_ensembl_gene;NEAREST=C2orf16
rs1919127	2:27801493	C	ENSG00000221843	ENST00000408964	Transcript	missense_variant	2105	2054	685	V/A	gTg/gCg	-	IMPACT=MODERATE;STRAND=1;SYMBOL=C2orf16;SYMBOL_SOURCE=HGNC;HGNC_ID=25275;NEAREST=C2orf16;SIFT=tolerated(0.08);PolyPhen=benign(0.091);EXON=1/1
rs1919127	2:27801493	C	ENSG00000243943	ENST00000413371	Transcript	upstream_gene_variant	-	-	-	-	-	-	IMPACT=MODIFIER;DISTANCE=4483;STRAND=1;SYMBOL=ZNF512;SYMBOL_SOURCE=HGNC;HGNC_ID=29380;NEAREST=C2orf16
rs1919127	2:27801493	C	ENSG00000243943	ENST00000416005	Transcript	upstream_gene_variant	-	-	-	-	-	-	IMPACT=MODIFIER;DISTANCE=4453;STRAND=1;SYMBOL=ZNF512;SYMBOL_SOURCE=HGNC;HGNC_ID=29380;NEAREST=C2orf16
rs1919127	2:27801493	C	ENSG00000243943	ENST00000461705	Transcript	upstream_gene_variant	-	-	-	-	-	-	IMPACT=MODIFIER;DISTANCE=4658;STRAND=1;SYMBOL=ZNF512;SYMBOL_SOURCE=HGNC;HGNC_ID=29380;NEAREST=C2orf16
rs1919127	2:27801493	C	ENSG00000243943	ENST00000494548	Transcript	upstream_gene_variant	-	-	-	-	-	-	IMPACT=MODIFIER;DISTANCE=4418;STRAND=1;SYMBOL=ZNF512;SYMBOL_SOURCE=HGNC;HGNC_ID=29380;NEAREST=C2orf16
rs1919127	2:27801493	C	ENSG00000259080	ENST00000505973	Transcript	upstream_gene_variant	-	-	-	-	-	-	IMPACT=MODIFIER;DISTANCE=4420;STRAND=1;SYMBOL=RP11-158I13.2;SYMBOL_SOURCE=Clone_based_vega_gene;NEAREST=C2orf16
rs1919127	2:27801493	C	ENSG00000243943	ENST00000556601	Transcript	upstream_gene_variant	-	-	-	-	-	-	IMPACT=MODIFIER;DISTANCE=4420;STRAND=1;SYMBOL=ZNF512;SYMBOL_SOURCE=HGNC;HGNC_ID=29380;NEAREST=C2orf16
rs1919128	2:27801759	G	ENSG00000243943	ENST00000355467	Transcript	upstream_gene_variant	-	-	-	-	-	-	IMPACT=MODIFIER;DISTANCE=4138;STRAND=1;SYMBOL=ZNF512;SYMBOL_SOURCE=HGNC;HGNC_ID=29380;NEAREST=C2orf16
rs1919128	2:27801759	G	ENSG00000243943	ENST00000379717	Transcript	upstream_gene_variant	-	-	-	-	-	-	IMPACT=MODIFIER;DISTANCE=4138;STRAND=1;SYMBOL=ZNF512;SYMBOL_SOURCE=HGNC;HGNC_ID=29380;NEAREST=C2orf16
rs1919128	2:27801759	G	ENSG00000221531	ENST00000408604	Transcript	downstream_gene_variant	-	-	-	-	-	-	IMPACT=MODIFIER;DISTANCE=2997;STRAND=-1;SYMBOL=AC074091.1;SYMBOL_SOURCE=Clone_based_ensembl_gene;NEAREST=C2orf16
rs1919128	2:27801759	G	ENSG00000221843	ENST00000408964	Transcript	missense_variant	2371	2320	774	I/V	Att/Gtt	-	IMPACT=MODERATE;STRAND=1;SYMBOL=C2orf16;SYMBOL_SOURCE=HGNC;HGNC_ID=25275;NEAREST=C2orf16;SIFT=tolerated(0.11);PolyPhen=possibly_damaging(0.775);EXON=1/1
rs1919128	2:27801759	G	ENSG00000243943	ENST00000413371	Transcript	upstream_gene_variant	-	-	-	-	-	-	IMPACT=MODIFIER;DISTANCE=4217;STRAND=1;SYMBOL=ZNF512;SYMBOL_SOURCE=HGNC;HGNC_ID=29380;NEAREST=C2orf16
rs1919128	2:27801759	G	ENSG00000243943	ENST00000416005	Transcript	upstream_gene_variant	-	-	-	-	-	-	IMPACT=MODIFIER;DISTANCE=4187;STRAND=1;SYMBOL=ZNF512;SYMBOL_SOURCE=HGNC;HGNC_ID=29380;NEAREST=C2orf16
rs1919128	2:27801759	G	ENSG00000243943	ENST00000461705	Transcript	upstream_gene_variant	-	-	-	-	-	-	IMPACT=MODIFIER;DISTANCE=4392;STRAND=1;SYMBOL=ZNF512;SYMBOL_SOURCE=HGNC;HGNC_ID=29380;NEAREST=C2orf16
rs1919128	2:27801759	G	ENSG00000243943	ENST00000494548	Transcript	upstream_gene_variant	-	-	-	-	-	-	IMPACT=MODIFIER;DISTANCE=4152;STRAND=1;SYMBOL=ZNF512;SYMBOL_SOURCE=HGNC;HGNC_ID=29380;NEAREST=C2orf16
rs1919128	2:27801759	G	ENSG00000259080	ENST00000505973	Transcript	upstream_gene_variant	-	-	-	-	-	-	IMPACT=MODIFIER;DISTANCE=4154;STRAND=1;SYMBOL=RP11-158I13.2;SYMBOL_SOURCE=Clone_based_vega_gene;NEAREST=C2orf16
rs1919128	2:27801759	G	ENSG00000243943	ENST00000556601	Transcript	upstream_gene_variant	-	-	-	-	-	-	IMPACT=MODIFIER;DISTANCE=4154;STRAND=1;SYMBOL=ZNF512;SYMBOL_SOURCE=HGNC;HGNC_ID=29380;NEAREST=C2orf16
rs12478841	2:27811722	G	ENSG00000243943	ENST00000355467	Transcript	intron_variant	-	-	-	-	-	-	IMPACT=MODIFIER;STRAND=1;SYMBOL=ZNF512;SYMBOL_SOURCE=HGNC;HGNC_ID=29380;NEAREST=ZNF512;INTRON=2/13
rs12478841	2:27811722	G	ENSG00000243943	ENST00000379717	Transcript	intron_variant	-	-	-	-	-	-	IMPACT=MODIFIER;STRAND=1;SYMBOL=ZNF512;SYMBOL_SOURCE=HGNC;HGNC_ID=29380;NEAREST=ZNF512;INTRON=2/13
rs12478841	2:27811722	G	ENSG00000243943	ENST00000413371	Transcript	intron_variant	-	-	-	-	-	-	IMPACT=MODIFIER;STRAND=1;SYMBOL=ZNF512;SYMBOL_SOURCE=HGNC;HGNC_ID=29380;NEAREST=ZNF512;INTRON=3/14
rs12478841	2:27811722	G	ENSG00000243943	ENST00000416005	Transcript	intron_variant	-	-	-	-	-	-	IMPACT=MODIFIER;STRAND=1;SYMBOL=ZNF512;SYMBOL_SOURCE=HGNC;HGNC_ID=29380;NEAREST=ZNF512;INTRON=2/12
rs12478841	2:27811722	G	ENSG00000243943	ENST00000461705	Transcript	intron_variant,non_coding_transcript_variant	-	-	-	-	-	-	IMPACT=MODIFIER;STRAND=1;SYMBOL=ZNF512;SYMBOL_SOURCE=HGNC;HGNC_ID=29380;NEAREST=ZNF512;INTRON=1/1
rs12478841	2:27811722	G	ENSG00000243943	ENST00000494548	Transcript	intron_variant,non_coding_transcript_variant	-	-	-	-	-	-	IMPACT=MODIFIER;STRAND=1;SYMBOL=ZNF512;SYMBOL_SOURCE=HGNC;HGNC_ID=29380;NEAREST=ZNF512;INTRON=1/4
rs12478841	2:27811722	G	ENSG00000259080	ENST00000505973	Transcript	intron_variant,non_coding_transcript_variant	-	-	-	-	-	-	IMPACT=MODIFIER;STRAND=1;SYMBOL=RP11-158I13.2;SYMBOL_SOURCE=Clone_based_vega_gene;NEAREST=ZNF512;INTRON=1/17
rs12478841	2:27811722	G	ENSG00000243943	ENST00000556601	Transcript	intron_variant	-	-	-	-	-	-	IMPACT=MODIFIER;STRAND=1;SYMBOL=ZNF512;SYMBOL_SOURCE=HGNC;HGNC_ID=29380;NEAREST=ZNF512;INTRON=1/17
rs6760250	2:27812252	A	ENSG00000243943	ENST00000355467	Transcript	intron_variant	-	-	-	-	-	-	IMPACT=MODIFIER;STRAND=1;SYMBOL=ZNF512;SYMBOL_SOURCE=HGNC;HGNC_ID=29380;NEAREST=ZNF512;INTRON=2/13
rs6760250	2:27812252	A	ENSG00000243943	ENST00000379717	Transcript	intron_variant	-	-	-	-	-	-	IMPACT=MODIFIER;STRAND=1;SYMBOL=ZNF512;SYMBOL_SOURCE=HGNC;HGNC_ID=29380;NEAREST=ZNF512;INTRON=2/13
rs6760250	2:27812252	A	ENSG00000243943	ENST00000413371	Transcript	intron_variant	-	-	-	-	-	-	IMPACT=MODIFIER;STRAND=1;SYMBOL=ZNF512;SYMBOL_SOURCE=HGNC;HGNC_ID=29380;NEAREST=ZNF512;INTRON=3/14
rs6760250	2:27812252	A	ENSG00000243943	ENST00000416005	Transcript	intron_variant	-	-	-	-	-	-	IMPACT=MODIFIER;STRAND=1;SYMBOL=ZNF512;SYMBOL_SOURCE=HGNC;HGNC_ID=29380;NEAREST=ZNF512;INTRON=2/12
rs6760250	2:27812252	A	ENSG00000243943	ENST00000461705	Transcript	intron_variant,non_coding_transcript_variant	-	-	-	-	-	-	IMPACT=MODIFIER;STRAND=1;SYMBOL=ZNF512;SYMBOL_SOURCE=HGNC;HGNC_ID=29380;NEAREST=ZNF512;INTRON=1/1
rs6760250	2:27812252	A	ENSG00000243943	ENST00000494548	Transcript	intron_variant,non_coding_transcript_variant	-	-	-	-	-	-	IMPACT=MODIFIER;STRAND=1;SYMBOL=ZNF512;SYMBOL_SOURCE=HGNC;HGNC_ID=29380;NEAREST=ZNF512;INTRON=1/4
rs6760250	2:27812252	A	ENSG00000259080	ENST00000505973	Transcript	intron_variant,non_coding_transcript_variant	-	-	-	-	-	-	IMPACT=MODIFIER;STRAND=1;SYMBOL=RP11-158I13.2;SYMBOL_SOURCE=Clone_based_vega_gene;NEAREST=ZNF512;INTRON=1/17
rs6760250	2:27812252	A	ENSG00000243943	ENST00000556601	Transcript	intron_variant	-	-	-	-	-	-	IMPACT=MODIFIER;STRAND=1;SYMBOL=ZNF512;SYMBOL_SOURCE=HGNC;HGNC_ID=29380;NEAREST=ZNF512;INTRON=1/17
rs13022873	2:27815510	C	ENSG00000243943	ENST00000355467	Transcript	intron_variant	-	-	-	-	-	-	IMPACT=MODIFIER;STRAND=1;SYMBOL=ZNF512;SYMBOL_SOURCE=HGNC;HGNC_ID=29380;NEAREST=ZNF512;INTRON=2/13
rs13022873	2:27815510	C	ENSG00000243943	ENST00000379717	Transcript	intron_variant	-	-	-	-	-	-	IMPACT=MODIFIER;STRAND=1;SYMBOL=ZNF512;SYMBOL_SOURCE=HGNC;HGNC_ID=29380;NEAREST=ZNF512;INTRON=2/13
rs13022873	2:27815510	C	ENSG00000243943	ENST00000413371	Transcript	intron_variant	-	-	-	-	-	-	IMPACT=MODIFIER;STRAND=1;SYMBOL=ZNF512;SYMBOL_SOURCE=HGNC;HGNC_ID=29380;NEAREST=ZNF512;INTRON=3/14
rs13022873	2:27815510	C	ENSG00000243943	ENST00000416005	Transcript	intron_variant	-	-	-	-	-	-	IMPACT=MODIFIER;STRAND=1;SYMBOL=ZNF512;SYMBOL_SOURCE=HGNC;HGNC_ID=29380;NEAREST=ZNF512;INTRON=2/12
rs13022873	2:27815510	C	ENSG00000243943	ENST00000461705	Transcript	intron_variant,non_coding_transcript_variant	-	-	-	-	-	-	IMPACT=MODIFIER;STRAND=1;SYMBOL=ZNF512;SYMBOL_SOURCE=HGNC;HGNC_ID=29380;NEAREST=ZNF512;INTRON=1/1
rs13022873	2:27815510	C	ENSG00000243943	ENST00000494548	Transcript	intron_variant,non_coding_transcript_variant	-	-	-	-	-	-	IMPACT=MODIFIER;STRAND=1;SYMBOL=ZNF512;SYMBOL_SOURCE=HGNC;HGNC_ID=29380;NEAREST=ZNF512;INTRON=1/4
rs13022873	2:27815510	C	ENSG00000259080	ENST00000505973	Transcript	intron_variant,non_coding_transcript_variant	-	-	-	-	-	-	IMPACT=MODIFIER;STRAND=1;SYMBOL=RP11-158I13.2;SYMBOL_SOURCE=Clone_based_vega_gene;NEAREST=ZNF512;INTRON=1/17
rs13022873	2:27815510	C	ENSG00000243943	ENST00000556601	Transcript	intron_variant	-	-	-	-	-	-	IMPACT=MODIFIER;STRAND=1;SYMBOL=ZNF512;SYMBOL_SOURCE=HGNC;HGNC_ID=29380;NEAREST=ZNF512;INTRON=1/17
rs13010586	2:27817817	A	ENSG00000243943	ENST00000355467	Transcript	intron_variant	-	-	-	-	-	-	IMPACT=MODIFIER;STRAND=1;SYMBOL=ZNF512;SYMBOL_SOURCE=HGNC;HGNC_ID=29380;NEAREST=ZNF512;INTRON=2/13
rs13010586	2:27817817	A	ENSG00000243943	ENST00000379717	Transcript	intron_variant	-	-	-	-	-	-	IMPACT=MODIFIER;STRAND=1;SYMBOL=ZNF512;SYMBOL_SOURCE=HGNC;HGNC_ID=29380;NEAREST=ZNF512;INTRON=2/13
rs13010586	2:27817817	A	ENSG00000243943	ENST00000413371	Transcript	intron_variant	-	-	-	-	-	-	IMPACT=MODIFIER;STRAND=1;SYMBOL=ZNF512;SYMBOL_SOURCE=HGNC;HGNC_ID=29380;NEAREST=ZNF512;INTRON=3/14
rs13010586	2:27817817	A	ENSG00000243943	ENST00000416005	Transcript	intron_variant	-	-	-	-	-	-	IMPACT=MODIFIER;STRAND=1;SYMBOL=ZNF512;SYMBOL_SOURCE=HGNC;HGNC_ID=29380;NEAREST=ZNF512;INTRON=2/12
rs13010586	2:27817817	A	ENSG00000243943	ENST00000461705	Transcript	intron_variant,non_coding_transcript_variant	-	-	-	-	-	-	IMPACT=MODIFIER;STRAND=1;SYMBOL=ZNF512;SYMBOL_SOURCE=HGNC;HGNC_ID=29380;NEAREST=ZNF512;INTRON=1/1
rs13010586	2:27817817	A	ENSG00000243943	ENST00000494548	Transcript	intron_variant,non_coding_transcript_variant	-	-	-	-	-	-	IMPACT=MODIFIER;STRAND=1;SYMBOL=ZNF512;SYMBOL_SOURCE=HGNC;HGNC_ID=29380;NEAREST=ZNF512;INTRON=1/4
rs13010586	2:27817817	A	ENSG00000259080	ENST00000505973	Transcript	intron_variant,non_coding_transcript_variant	-	-	-	-	-	-	IMPACT=MODIFIER;STRAND=1;SYMBOL=RP11-158I13.2;SYMBOL_SOURCE=Clone_based_vega_gene;NEAREST=ZNF512;INTRON=1/17
rs13010586	2:27817817	A	ENSG00000243943	ENST00000556601	Transcript	intron_variant	-	-	-	-	-	-	IMPACT=MODIFIER;STRAND=1;SYMBOL=ZNF512;SYMBOL_SOURCE=HGNC;HGNC_ID=29380;NEAREST=ZNF512;INTRON=1/17
rs12989678	2:27821482	T	ENSG00000243943	ENST00000355467	Transcript	intron_variant	-	-	-	-	-	-	IMPACT=MODIFIER;STRAND=1;SYMBOL=ZNF512;SYMBOL_SOURCE=HGNC;HGNC_ID=29380;NEAREST=ZNF512;INTRON=3/13
rs12989678	2:27821482	T	ENSG00000243943	ENST00000379717	Transcript	intron_variant	-	-	-	-	-	-	IMPACT=MODIFIER;STRAND=1;SYMBOL=ZNF512;SYMBOL_SOURCE=HGNC;HGNC_ID=29380;NEAREST=ZNF512;INTRON=3/13
rs12989678	2:27821482	T	ENSG00000243943	ENST00000413371	Transcript	intron_variant	-	-	-	-	-	-	IMPACT=MODIFIER;STRAND=1;SYMBOL=ZNF512;SYMBOL_SOURCE=HGNC;HGNC_ID=29380;NEAREST=ZNF512;INTRON=4/14
rs12989678	2:27821482	T	ENSG00000243943	ENST00000416005	Transcript	intron_variant	-	-	-	-	-	-	IMPACT=MODIFIER;STRAND=1;SYMBOL=ZNF512;SYMBOL_SOURCE=HGNC;HGNC_ID=29380;NEAREST=ZNF512;INTRON=3/12
rs12989678	2:27821482	T	ENSG00000243943	ENST00000461705	Transcript	downstream_gene_variant	-	-	-	-	-	-	IMPACT=MODIFIER;DISTANCE=428;STRAND=1;SYMBOL=ZNF512;SYMBOL_SOURCE=HGNC;HGNC_ID=29380;NEAREST=ZNF512
rs12989678	2:27821482	T	ENSG00000243943	ENST00000494548	Transcript	intron_variant,non_coding_transcript_variant	-	-	-	-	-	-	IMPACT=MODIFIER;STRAND=1;SYMBOL=ZNF512;SYMBOL_SOURCE=HGNC;HGNC_ID=29380;NEAREST=ZNF512;INTRON=2/4
rs12989678	2:27821482	T	ENSG00000259080	ENST00000505973	Transcript	intron_variant,non_coding_transcript_variant	-	-	-	-	-	-	IMPACT=MODIFIER;STRAND=1;SYMBOL=RP11-158I13.2;SYMBOL_SOURCE=Clone_based_vega_gene;NEAREST=ZNF512;INTRON=2/17
rs12989678	2:27821482	T	ENSG00000243943	ENST00000556601	Transcript	intron_variant	-	-	-	-	-	-	IMPACT=MODIFIER;STRAND=1;SYMBOL=ZNF512;SYMBOL_SOURCE=HGNC;HGNC_ID=29380;NEAREST=ZNF512;INTRON=2/17
rs12467476	2:27825715	C	ENSG00000243943	ENST00000355467	Transcript	intron_variant	-	-	-	-	-	-	IMPACT=MODIFIER;STRAND=1;SYMBOL=ZNF512;SYMBOL_SOURCE=HGNC;HGNC_ID=29380;NEAREST=ZNF512;INTRON=8/13
rs12467476	2:27825715	C	ENSG00000243943	ENST00000379717	Transcript	intron_variant	-	-	-	-	-	-	IMPACT=MODIFIER;STRAND=1;SYMBOL=ZNF512;SYMBOL_SOURCE=HGNC;HGNC_ID=29380;NEAREST=ZNF512;INTRON=8/13
rs12467476	2:27825715	C	ENSG00000243943	ENST00000413371	Transcript	intron_variant	-	-	-	-	-	-	IMPACT=MODIFIER;STRAND=1;SYMBOL=ZNF512;SYMBOL_SOURCE=HGNC;HGNC_ID=29380;NEAREST=ZNF512;INTRON=9/14
rs12467476	2:27825715	C	ENSG00000243943	ENST00000416005	Transcript	intron_variant	-	-	-	-	-	-	IMPACT=MODIFIER;STRAND=1;SYMBOL=ZNF512;SYMBOL_SOURCE=HGNC;HGNC_ID=29380;NEAREST=ZNF512;INTRON=7/12
rs12467476	2:27825715	C	ENSG00000243943	ENST00000461705	Transcript	downstream_gene_variant	-	-	-	-	-	-	IMPACT=MODIFIER;DISTANCE=4661;STRAND=1;SYMBOL=ZNF512;SYMBOL_SOURCE=HGNC;HGNC_ID=29380;NEAREST=ZNF512
rs12467476	2:27825715	C	ENSG00000243943	ENST00000494548	Transcript	downstream_gene_variant	-	-	-	-	-	-	IMPACT=MODIFIER;DISTANCE=2120;STRAND=1;SYMBOL=ZNF512;SYMBOL_SOURCE=HGNC;HGNC_ID=29380;NEAREST=ZNF512
rs12467476	2:27825715	C	ENSG00000259080	ENST00000505973	Transcript	intron_variant,non_coding_transcript_variant	-	-	-	-	-	-	IMPACT=MODIFIER;STRAND=1;SYMBOL=RP11-158I13.2;SYMBOL_SOURCE=Clone_based_vega_gene;NEAREST=ZNF512;INTRON=6/17
rs12467476	2:27825715	C	ENSG00000243943	ENST00000556601	Transcript	intron_variant	-	-	-	-	-	-	IMPACT=MODIFIER;STRAND=1;SYMBOL=ZNF512;SYMBOL_SOURCE=HGNC;HGNC_ID=29380;NEAREST=ZNF512;INTRON=6/17
rs12464616	2:27827092	T	ENSG00000243943	ENST00000355467	Transcript	intron_variant	-	-	-	-	-	-	IMPACT=MODIFIER;STRAND=1;SYMBOL=ZNF512;SYMBOL_SOURCE=HGNC;HGNC_ID=29380;NEAREST=ZNF512;INTRON=9/13
rs12464616	2:27827092	T	ENSG00000243943	ENST00000379717	Transcript	intron_variant	-	-	-	-	-	-	IMPACT=MODIFIER;STRAND=1;SYMBOL=ZNF512;SYMBOL_SOURCE=HGNC;HGNC_ID=29380;NEAREST=ZNF512;INTRON=9/13
rs12464616	2:27827092	T	ENSG00000243943	ENST00000413371	Transcript	intron_variant	-	-	-	-	-	-	IMPACT=MODIFIER;STRAND=1;SYMBOL=ZNF512;SYMBOL_SOURCE=HGNC;HGNC_ID=29380;NEAREST=ZNF512;INTRON=10/14
rs12464616	2:27827092	T	ENSG00000243943	ENST00000416005	Transcript	intron_variant	-	-	-	-	-	-	IMPACT=MODIFIER;STRAND=1;SYMBOL=ZNF512;SYMBOL_SOURCE=HGNC;HGNC_ID=29380;NEAREST=ZNF512;INTRON=8/12
rs12464616	2:27827092	T	ENSG00000243943	ENST00000494548	Transcript	downstream_gene_variant	-	-	-	-	-	-	IMPACT=MODIFIER;DISTANCE=3497;STRAND=1;SYMBOL=ZNF512;SYMBOL_SOURCE=HGNC;HGNC_ID=29380;NEAREST=ZNF512
rs12464616	2:27827092	T	ENSG00000259080	ENST00000505973	Transcript	intron_variant,non_coding_transcript_variant	-	-	-	-	-	-	IMPACT=MODIFIER;STRAND=1;SYMBOL=RP11-158I13.2;SYMBOL_SOURCE=Clone_based_vega_gene;NEAREST=ZNF512;INTRON=7/17
rs12464616	2:27827092	T	ENSG00000243943	ENST00000556601	Transcript	intron_variant	-	-	-	-	-	-	IMPACT=MODIFIER;STRAND=1;SYMBOL=ZNF512;SYMBOL_SOURCE=HGNC;HGNC_ID=29380;NEAREST=ZNF512;INTRON=7/17
rs2384656	2:27832055	G	ENSG00000243943	ENST00000355467	Transcript	intron_variant	-	-	-	-	-	-	IMPACT=MODIFIER;STRAND=1;SYMBOL=ZNF512;SYMBOL_SOURCE=HGNC;HGNC_ID=29380;NEAREST=GPN1;INTRON=10/13
rs2384656	2:27832055	G	ENSG00000243943	ENST00000379717	Transcript	intron_variant	-	-	-	-	-	-	IMPACT=MODIFIER;STRAND=1;SYMBOL=ZNF512;SYMBOL_SOURCE=HGNC;HGNC_ID=29380;NEAREST=GPN1;INTRON=10/13
rs2384656	2:27832055	G	ENSG00000243943	ENST00000413371	Transcript	intron_variant	-	-	-	-	-	-	IMPACT=MODIFIER;STRAND=1;SYMBOL=ZNF512;SYMBOL_SOURCE=HGNC;HGNC_ID=29380;NEAREST=GPN1;INTRON=11/14
rs2384656	2:27832055	G	ENSG00000243943	ENST00000416005	Transcript	intron_variant	-	-	-	-	-	-	IMPACT=MODIFIER;STRAND=1;SYMBOL=ZNF512;SYMBOL_SOURCE=HGNC;HGNC_ID=29380;NEAREST=GPN1;INTRON=9/12
rs2384656	2:27832055	G	ENSG00000259080	ENST00000505973	Transcript	intron_variant,non_coding_transcript_variant	-	-	-	-	-	-	IMPACT=MODIFIER;STRAND=1;SYMBOL=RP11-158I13.2;SYMBOL_SOURCE=Clone_based_vega_gene;NEAREST=GPN1;INTRON=8/17
rs2384656	2:27832055	G	ENSG00000243943	ENST00000556601	Transcript	intron_variant	-	-	-	-	-	-	IMPACT=MODIFIER;STRAND=1;SYMBOL=ZNF512;SYMBOL_SOURCE=HGNC;HGNC_ID=29380;NEAREST=GPN1;INTRON=8/17
rs74175068	2:27833502	C	ENSG00000243943	ENST00000355467	Transcript	intron_variant	-	-	-	-	-	-	IMPACT=MODIFIER;STRAND=1;SYMBOL=ZNF512;SYMBOL_SOURCE=HGNC;HGNC_ID=29380;NEAREST=GPN1;INTRON=10/13
rs74175068	2:27833502	C	ENSG00000243943	ENST00000379717	Transcript	intron_variant	-	-	-	-	-	-	IMPACT=MODIFIER;STRAND=1;SYMBOL=ZNF512;SYMBOL_SOURCE=HGNC;HGNC_ID=29380;NEAREST=GPN1;INTRON=10/13
rs74175068	2:27833502	C	ENSG00000243943	ENST00000413371	Transcript	intron_variant	-	-	-	-	-	-	IMPACT=MODIFIER;STRAND=1;SYMBOL=ZNF512;SYMBOL_SOURCE=HGNC;HGNC_ID=29380;NEAREST=GPN1;INTRON=11/14
rs74175068	2:27833502	C	ENSG00000243943	ENST00000416005	Transcript	intron_variant	-	-	-	-	-	-	IMPACT=MODIFIER;STRAND=1;SYMBOL=ZNF512;SYMBOL_SOURCE=HGNC;HGNC_ID=29380;NEAREST=GPN1;INTRON=9/12
rs74175068	2:27833502	C	ENSG00000259080	ENST00000505973	Transcript	intron_variant,non_coding_transcript_variant	-	-	-	-	-	-	IMPACT=MODIFIER;STRAND=1;SYMBOL=RP11-158I13.2;SYMBOL_SOURCE=Clone_based_vega_gene;NEAREST=GPN1;INTRON=8/17
rs74175068	2:27833502	C	ENSG00000243943	ENST00000556601	Transcript	intron_variant	-	-	-	-	-	-	IMPACT=MODIFIER;STRAND=1;SYMBOL=ZNF512;SYMBOL_SOURCE=HGNC;HGNC_ID=29380;NEAREST=GPN1;INTRON=8/17
rs34016998	2:27833687	T	ENSG00000243943	ENST00000355467	Transcript	intron_variant	-	-	-	-	-	-	IMPACT=MODIFIER;STRAND=1;SYMBOL=ZNF512;SYMBOL_SOURCE=HGNC;HGNC_ID=29380;NEAREST=GPN1;INTRON=10/13
rs34016998	2:27833687	T	ENSG00000243943	ENST00000379717	Transcript	intron_variant	-	-	-	-	-	-	IMPACT=MODIFIER;STRAND=1;SYMBOL=ZNF512;SYMBOL_SOURCE=HGNC;HGNC_ID=29380;NEAREST=GPN1;INTRON=10/13
rs34016998	2:27833687	T	ENSG00000243943	ENST00000413371	Transcript	intron_variant	-	-	-	-	-	-	IMPACT=MODIFIER;STRAND=1;SYMBOL=ZNF512;SYMBOL_SOURCE=HGNC;HGNC_ID=29380;NEAREST=GPN1;INTRON=11/14
rs34016998	2:27833687	T	ENSG00000243943	ENST00000416005	Transcript	intron_variant	-	-	-	-	-	-	IMPACT=MODIFIER;STRAND=1;SYMBOL=ZNF512;SYMBOL_SOURCE=HGNC;HGNC_ID=29380;NEAREST=GPN1;INTRON=9/12
rs34016998	2:27833687	T	ENSG00000259080	ENST00000505973	Transcript	intron_variant,non_coding_transcript_variant	-	-	-	-	-	-	IMPACT=MODIFIER;STRAND=1;SYMBOL=RP11-158I13.2;SYMBOL_SOURCE=Clone_based_vega_gene;NEAREST=GPN1;INTRON=8/17
rs34016998	2:27833687	T	ENSG00000243943	ENST00000556601	Transcript	intron_variant	-	-	-	-	-	-	IMPACT=MODIFIER;STRAND=1;SYMBOL=ZNF512;SYMBOL_SOURCE=HGNC;HGNC_ID=29380;NEAREST=GPN1;INTRON=8/17
rs12987055	2:27834152	C	ENSG00000243943	ENST00000355467	Transcript	intron_variant	-	-	-	-	-	-	IMPACT=MODIFIER;STRAND=1;SYMBOL=ZNF512;SYMBOL_SOURCE=HGNC;HGNC_ID=29380;NEAREST=GPN1;INTRON=10/13
rs12987055	2:27834152	C	ENSG00000243943	ENST00000379717	Transcript	intron_variant	-	-	-	-	-	-	IMPACT=MODIFIER;STRAND=1;SYMBOL=ZNF512;SYMBOL_SOURCE=HGNC;HGNC_ID=29380;NEAREST=GPN1;INTRON=10/13
rs12987055	2:27834152	C	ENSG00000243943	ENST00000413371	Transcript	intron_variant	-	-	-	-	-	-	IMPACT=MODIFIER;STRAND=1;SYMBOL=ZNF512;SYMBOL_SOURCE=HGNC;HGNC_ID=29380;NEAREST=GPN1;INTRON=11/14
rs12987055	2:27834152	C	ENSG00000243943	ENST00000416005	Transcript	intron_variant	-	-	-	-	-	-	IMPACT=MODIFIER;STRAND=1;SYMBOL=ZNF512;SYMBOL_SOURCE=HGNC;HGNC_ID=29380;NEAREST=GPN1;INTRON=9/12
rs12987055	2:27834152	C	ENSG00000259080	ENST00000505973	Transcript	intron_variant,non_coding_transcript_variant	-	-	-	-	-	-	IMPACT=MODIFIER;STRAND=1;SYMBOL=RP11-158I13.2;SYMBOL_SOURCE=Clone_based_vega_gene;NEAREST=GPN1;INTRON=8/17
rs12987055	2:27834152	C	ENSG00000243943	ENST00000556601	Transcript	intron_variant	-	-	-	-	-	-	IMPACT=MODIFIER;STRAND=1;SYMBOL=ZNF512;SYMBOL_SOURCE=HGNC;HGNC_ID=29380;NEAREST=GPN1;INTRON=8/17
rs13020949	2:27836605	T	ENSG00000243943	ENST00000355467	Transcript	intron_variant	-	-	-	-	-	-	IMPACT=MODIFIER;STRAND=1;SYMBOL=ZNF512;SYMBOL_SOURCE=HGNC;HGNC_ID=29380;NEAREST=GPN1;INTRON=10/13
rs13020949	2:27836605	T	ENSG00000243943	ENST00000379717	Transcript	intron_variant	-	-	-	-	-	-	IMPACT=MODIFIER;STRAND=1;SYMBOL=ZNF512;SYMBOL_SOURCE=HGNC;HGNC_ID=29380;NEAREST=GPN1;INTRON=10/13
rs13020949	2:27836605	T	ENSG00000243943	ENST00000413371	Transcript	intron_variant	-	-	-	-	-	-	IMPACT=MODIFIER;STRAND=1;SYMBOL=ZNF512;SYMBOL_SOURCE=HGNC;HGNC_ID=29380;NEAREST=GPN1;INTRON=11/14
rs13020949	2:27836605	T	ENSG00000243943	ENST00000416005	Transcript	intron_variant	-	-	-	-	-	-	IMPACT=MODIFIER;STRAND=1;SYMBOL=ZNF512;SYMBOL_SOURCE=HGNC;HGNC_ID=29380;NEAREST=GPN1;INTRON=9/12
rs13020949	2:27836605	T	ENSG00000243943	ENST00000488055	Transcript	upstream_gene_variant	-	-	-	-	-	-	IMPACT=MODIFIER;DISTANCE=3313;STRAND=1;SYMBOL=ZNF512;SYMBOL_SOURCE=HGNC;HGNC_ID=29380;NEAREST=GPN1
rs13020949	2:27836605	T	ENSG00000259080	ENST00000505973	Transcript	intron_variant,non_coding_transcript_variant	-	-	-	-	-	-	IMPACT=MODIFIER;STRAND=1;SYMBOL=RP11-158I13.2;SYMBOL_SOURCE=Clone_based_vega_gene;NEAREST=GPN1;INTRON=8/17
rs13020949	2:27836605	T	ENSG00000243943	ENST00000556601	Transcript	intron_variant	-	-	-	-	-	-	IMPACT=MODIFIER;STRAND=1;SYMBOL=ZNF512;SYMBOL_SOURCE=HGNC;HGNC_ID=29380;NEAREST=GPN1;INTRON=8/17
rs4666000	2:27839369	C	ENSG00000243943	ENST00000355467	Transcript	intron_variant	-	-	-	-	-	-	IMPACT=MODIFIER;STRAND=1;SYMBOL=ZNF512;SYMBOL_SOURCE=HGNC;HGNC_ID=29380;NEAREST=GPN1;INTRON=12/13
rs4666000	2:27839369	C	ENSG00000243943	ENST00000379717	Transcript	intron_variant	-	-	-	-	-	-	IMPACT=MODIFIER;STRAND=1;SYMBOL=ZNF512;SYMBOL_SOURCE=HGNC;HGNC_ID=29380;NEAREST=GPN1;INTRON=12/13
rs4666000	2:27839369	C	ENSG00000243943	ENST00000413371	Transcript	intron_variant	-	-	-	-	-	-	IMPACT=MODIFIER;STRAND=1;SYMBOL=ZNF512;SYMBOL_SOURCE=HGNC;HGNC_ID=29380;NEAREST=GPN1;INTRON=13/14
rs4666000	2:27839369	C	ENSG00000243943	ENST00000416005	Transcript	intron_variant	-	-	-	-	-	-	IMPACT=MODIFIER;STRAND=1;SYMBOL=ZNF512;SYMBOL_SOURCE=HGNC;HGNC_ID=29380;NEAREST=GPN1;INTRON=11/12
rs4666000	2:27839369	C	ENSG00000243943	ENST00000488055	Transcript	upstream_gene_variant	-	-	-	-	-	-	IMPACT=MODIFIER;DISTANCE=549;STRAND=1;SYMBOL=ZNF512;SYMBOL_SOURCE=HGNC;HGNC_ID=29380;NEAREST=GPN1
rs4666000	2:27839369	C	ENSG00000259080	ENST00000505973	Transcript	intron_variant,non_coding_transcript_variant	-	-	-	-	-	-	IMPACT=MODIFIER;STRAND=1;SYMBOL=RP11-158I13.2;SYMBOL_SOURCE=Clone_based_vega_gene;NEAREST=GPN1;INTRON=10/17
rs4666000	2:27839369	C	ENSG00000243943	ENST00000556601	Transcript	intron_variant	-	-	-	-	-	-	IMPACT=MODIFIER;STRAND=1;SYMBOL=ZNF512;SYMBOL_SOURCE=HGNC;HGNC_ID=29380;NEAREST=GPN1;INTRON=10/17
rs2068834	2:27839539	C	ENSG00000243943	ENST00000355467	Transcript	intron_variant	-	-	-	-	-	-	IMPACT=MODIFIER;STRAND=1;SYMBOL=ZNF512;SYMBOL_SOURCE=HGNC;HGNC_ID=29380;NEAREST=GPN1;INTRON=12/13
rs2068834	2:27839539	C	ENSG00000243943	ENST00000379717	Transcript	intron_variant	-	-	-	-	-	-	IMPACT=MODIFIER;STRAND=1;SYMBOL=ZNF512;SYMBOL_SOURCE=HGNC;HGNC_ID=29380;NEAREST=GPN1;INTRON=12/13
rs2068834	2:27839539	C	ENSG00000243943	ENST00000413371	Transcript	intron_variant	-	-	-	-	-	-	IMPACT=MODIFIER;STRAND=1;SYMBOL=ZNF512;SYMBOL_SOURCE=HGNC;HGNC_ID=29380;NEAREST=GPN1;INTRON=13/14
rs2068834	2:27839539	C	ENSG00000243943	ENST00000416005	Transcript	intron_variant	-	-	-	-	-	-	IMPACT=MODIFIER;STRAND=1;SYMBOL=ZNF512;SYMBOL_SOURCE=HGNC;HGNC_ID=29380;NEAREST=GPN1;INTRON=11/12
rs2068834	2:27839539	C	ENSG00000243943	ENST00000488055	Transcript	upstream_gene_variant	-	-	-	-	-	-	IMPACT=MODIFIER;DISTANCE=379;STRAND=1;SYMBOL=ZNF512;SYMBOL_SOURCE=HGNC;HGNC_ID=29380;NEAREST=GPN1
rs2068834	2:27839539	C	ENSG00000259080	ENST00000505973	Transcript	intron_variant,non_coding_transcript_variant	-	-	-	-	-	-	IMPACT=MODIFIER;STRAND=1;SYMBOL=RP11-158I13.2;SYMBOL_SOURCE=Clone_based_vega_gene;NEAREST=GPN1;INTRON=10/17
rs2068834	2:27839539	C	ENSG00000243943	ENST00000556601	Transcript	intron_variant	-	-	-	-	-	-	IMPACT=MODIFIER;STRAND=1;SYMBOL=ZNF512;SYMBOL_SOURCE=HGNC;HGNC_ID=29380;NEAREST=GPN1;INTRON=10/17
rs4666002	2:27840640	C	ENSG00000243943	ENST00000355467	Transcript	intron_variant	-	-	-	-	-	-	IMPACT=MODIFIER;STRAND=1;SYMBOL=ZNF512;SYMBOL_SOURCE=HGNC;HGNC_ID=29380;NEAREST=GPN1;INTRON=13/13
rs4666002	2:27840640	C	ENSG00000243943	ENST00000379717	Transcript	intron_variant	-	-	-	-	-	-	IMPACT=MODIFIER;STRAND=1;SYMBOL=ZNF512;SYMBOL_SOURCE=HGNC;HGNC_ID=29380;NEAREST=GPN1;INTRON=13/13
rs4666002	2:27840640	C	ENSG00000243943	ENST00000413371	Transcript	intron_variant	-	-	-	-	-	-	IMPACT=MODIFIER;STRAND=1;SYMBOL=ZNF512;SYMBOL_SOURCE=HGNC;HGNC_ID=29380;NEAREST=GPN1;INTRON=14/14
rs4666002	2:27840640	C	ENSG00000243943	ENST00000416005	Transcript	intron_variant	-	-	-	-	-	-	IMPACT=MODIFIER;STRAND=1;SYMBOL=ZNF512;SYMBOL_SOURCE=HGNC;HGNC_ID=29380;NEAREST=GPN1;INTRON=12/12
rs4666002	2:27840640	C	ENSG00000243943	ENST00000488055	Transcript	intron_variant,non_coding_transcript_variant	-	-	-	-	-	-	IMPACT=MODIFIER;STRAND=1;SYMBOL=ZNF512;SYMBOL_SOURCE=HGNC;HGNC_ID=29380;NEAREST=GPN1;INTRON=1/1
rs4666002	2:27840640	C	ENSG00000259080	ENST00000505973	Transcript	intron_variant,non_coding_transcript_variant	-	-	-	-	-	-	IMPACT=MODIFIER;STRAND=1;SYMBOL=RP11-158I13.2;SYMBOL_SOURCE=Clone_based_vega_gene;NEAREST=GPN1;INTRON=11/17
rs4666002	2:27840640	C	ENSG00000243943	ENST00000556601	Transcript	intron_variant	-	-	-	-	-	-	IMPACT=MODIFIER;STRAND=1;SYMBOL=ZNF512;SYMBOL_SOURCE=HGNC;HGNC_ID=29380;NEAREST=GPN1;INTRON=11/17
rs3749147	2:27851918	A	ENSG00000198522	ENST00000264718	Transcript	missense_variant	56	35	12	R/K	aGg/aAg	-	IMPACT=MODERATE;STRAND=1;SYMBOL=GPN1;SYMBOL_SOURCE=HGNC;HGNC_ID=17030;NEAREST=CCDC121;SIFT=tolerated_low_confidence(0.78);PolyPhen=benign(0.003);EXON=1/14
rs3749147	2:27851918	A	ENSG00000176714	ENST00000324364	Transcript	upstream_gene_variant	-	-	-	-	-	-	IMPACT=MODIFIER;DISTANCE=39;STRAND=-1;SYMBOL=CCDC121;SYMBOL_SOURCE=HGNC;HGNC_ID=25833;NEAREST=CCDC121
rs3749147	2:27851918	A	ENSG00000176714	ENST00000394775	Transcript	upstream_gene_variant	-	-	-	-	-	-	IMPACT=MODIFIER;DISTANCE=173;STRAND=-1;SYMBOL=CCDC121;SYMBOL_SOURCE=HGNC;HGNC_ID=25833;NEAREST=CCDC121
rs3749147	2:27851918	A	ENSG00000198522	ENST00000407583	Transcript	intron_variant	-	-	-	-	-	-	IMPACT=MODIFIER;STRAND=1;SYMBOL=GPN1;SYMBOL_SOURCE=HGNC;HGNC_ID=17030;NEAREST=CCDC121;INTRON=1/14
rs3749147	2:27851918	A	ENSG00000198522	ENST00000424214	Transcript	intron_variant	-	-	-	-	-	-	IMPACT=MODIFIER;STRAND=1;SYMBOL=GPN1;SYMBOL_SOURCE=HGNC;HGNC_ID=17030;NEAREST=CCDC121;INTRON=1/13
rs3749147	2:27851918	A	ENSG00000198522	ENST00000436280	Transcript	5_prime_UTR_variant,NMD_transcript_variant	28	-	-	-	-	-	IMPACT=MODIFIER;STRAND=1;SYMBOL=GPN1;SYMBOL_SOURCE=HGNC;HGNC_ID=17030;NEAREST=CCDC121;EXON=1/7
rs3749147	2:27851918	A	ENSG00000198522	ENST00000458167	Transcript	intron_variant	-	-	-	-	-	-	IMPACT=MODIFIER;STRAND=1;SYMBOL=GPN1;SYMBOL_SOURCE=HGNC;HGNC_ID=17030;NEAREST=CCDC121;INTRON=1/11
rs3749147	2:27851918	A	ENSG00000198522	ENST00000461249	Transcript	upstream_gene_variant	-	-	-	-	-	-	IMPACT=MODIFIER;DISTANCE=195;STRAND=1;SYMBOL=GPN1;SYMBOL_SOURCE=HGNC;HGNC_ID=17030;NEAREST=CCDC121
rs3749147	2:27851918	A	ENSG00000198522	ENST00000478484	Transcript	upstream_gene_variant	-	-	-	-	-	-	IMPACT=MODIFIER;DISTANCE=1;STRAND=1;SYMBOL=GPN1;SYMBOL_SOURCE=HGNC;HGNC_ID=17030;NEAREST=CCDC121
rs3749147	2:27851918	A	ENSG00000198522	ENST00000481754	Transcript	intron_variant,non_coding_transcript_variant	-	-	-	-	-	-	IMPACT=MODIFIER;STRAND=1;SYMBOL=GPN1;SYMBOL_SOURCE=HGNC;HGNC_ID=17030;NEAREST=CCDC121;INTRON=1/1
rs3749147	2:27851918	A	ENSG00000198522	ENST00000503738	Transcript	intron_variant	-	-	-	-	-	-	IMPACT=MODIFIER;STRAND=1;SYMBOL=GPN1;SYMBOL_SOURCE=HGNC;HGNC_ID=17030;NEAREST=CCDC121;INTRON=1/11
rs3749147	2:27851918	A	ENSG00000259080	ENST00000505973	Transcript	intron_variant,non_coding_transcript_variant	-	-	-	-	-	-	IMPACT=MODIFIER;STRAND=1;SYMBOL=RP11-158I13.2;SYMBOL_SOURCE=Clone_based_vega_gene;NEAREST=CCDC121;INTRON=12/17
rs3749147	2:27851918	A	ENSG00000198522	ENST00000515877	Transcript	intron_variant	-	-	-	-	-	-	IMPACT=MODIFIER;STRAND=1;SYMBOL=GPN1;SYMBOL_SOURCE=HGNC;HGNC_ID=17030;NEAREST=CCDC121;INTRON=1/13
rs3749147	2:27851918	A	ENSG00000176714	ENST00000522876	Transcript	upstream_gene_variant	-	-	-	-	-	-	IMPACT=MODIFIER;DISTANCE=160;STRAND=-1;FLAGS=cds_end_NF;SYMBOL=CCDC121;SYMBOL_SOURCE=HGNC;HGNC_ID=25833;NEAREST=CCDC121
rs3749147	2:27851918	A	ENSG00000243943	ENST00000556601	Transcript	intron_variant	-	-	-	-	-	-	IMPACT=MODIFIER;STRAND=1;SYMBOL=ZNF512;SYMBOL_SOURCE=HGNC;HGNC_ID=29380;NEAREST=CCDC121;INTRON=12/17
rs3749147	2:27851918	A	ENSG00000198522	ENST00000610189	Transcript	upstream_gene_variant	-	-	-	-	-	-	IMPACT=MODIFIER;DISTANCE=1;STRAND=1;SYMBOL=GPN1;SYMBOL_SOURCE=HGNC;HGNC_ID=17030;NEAREST=CCDC121
rs3749147	2:27851918	A	-	ENSR00000114441	RegulatoryFeature	regulatory_region_variant	-	-	-	-	-	-	IMPACT=MODIFIER;NEAREST=CCDC121;BIOTYPE=promoter
rs3749147	2:27851918	A	-	PB0124.1	MotifFeature	TF_binding_site_variant	-	-	-	-	-	-	IMPACT=MODIFIER;STRAND=-1;NEAREST=CCDC121;MOTIF_NAME=Gabp:PB0124.1;MOTIF_POS=12;HIGH_INF_POS=N;MOTIF_SCORE_CHANGE=-0.024
rs13002853	2:27853245	G	ENSG00000198522	ENST00000264718	Transcript	intron_variant	-	-	-	-	-	-	IMPACT=MODIFIER;STRAND=1;SYMBOL=GPN1;SYMBOL_SOURCE=HGNC;HGNC_ID=17030;NEAREST=GPN1;INTRON=2/13
rs13002853	2:27853245	G	ENSG00000176714	ENST00000324364	Transcript	upstream_gene_variant	-	-	-	-	-	-	IMPACT=MODIFIER;DISTANCE=1366;STRAND=-1;SYMBOL=CCDC121;SYMBOL_SOURCE=HGNC;HGNC_ID=25833;NEAREST=GPN1
rs13002853	2:27853245	G	ENSG00000176714	ENST00000394775	Transcript	upstream_gene_variant	-	-	-	-	-	-	IMPACT=MODIFIER;DISTANCE=1500;STRAND=-1;SYMBOL=CCDC121;SYMBOL_SOURCE=HGNC;HGNC_ID=25833;NEAREST=GPN1
rs13002853	2:27853245	G	ENSG00000198522	ENST00000407583	Transcript	intron_variant	-	-	-	-	-	-	IMPACT=MODIFIER;STRAND=1;SYMBOL=GPN1;SYMBOL_SOURCE=HGNC;HGNC_ID=17030;NEAREST=GPN1;INTRON=3/14
rs13002853	2:27853245	G	ENSG00000198522	ENST00000424214	Transcript	intron_variant	-	-	-	-	-	-	IMPACT=MODIFIER;STRAND=1;SYMBOL=GPN1;SYMBOL_SOURCE=HGNC;HGNC_ID=17030;NEAREST=GPN1;INTRON=2/13
rs13002853	2:27853245	G	ENSG00000198522	ENST00000436280	Transcript	intron_variant,NMD_transcript_variant	-	-	-	-	-	-	IMPACT=MODIFIER;STRAND=1;SYMBOL=GPN1;SYMBOL_SOURCE=HGNC;HGNC_ID=17030;NEAREST=GPN1;INTRON=2/6
rs13002853	2:27853245	G	ENSG00000198522	ENST00000458167	Transcript	intron_variant	-	-	-	-	-	-	IMPACT=MODIFIER;STRAND=1;SYMBOL=GPN1;SYMBOL_SOURCE=HGNC;HGNC_ID=17030;NEAREST=GPN1;INTRON=2/11
rs13002853	2:27853245	G	ENSG00000198522	ENST00000461249	Transcript	intron_variant,non_coding_transcript_variant	-	-	-	-	-	-	IMPACT=MODIFIER;STRAND=1;SYMBOL=GPN1;SYMBOL_SOURCE=HGNC;HGNC_ID=17030;NEAREST=GPN1;INTRON=2/10
rs13002853	2:27853245	G	ENSG00000198522	ENST00000478484	Transcript	intron_variant,non_coding_transcript_variant	-	-	-	-	-	-	IMPACT=MODIFIER;STRAND=1;SYMBOL=GPN1;SYMBOL_SOURCE=HGNC;HGNC_ID=17030;NEAREST=GPN1;INTRON=2/2
rs13002853	2:27853245	G	ENSG00000198522	ENST00000481754	Transcript	downstream_gene_variant	-	-	-	-	-	-	IMPACT=MODIFIER;DISTANCE=451;STRAND=1;SYMBOL=GPN1;SYMBOL_SOURCE=HGNC;HGNC_ID=17030;NEAREST=GPN1
rs13002853	2:27853245	G	ENSG00000198522	ENST00000503738	Transcript	intron_variant	-	-	-	-	-	-	IMPACT=MODIFIER;STRAND=1;SYMBOL=GPN1;SYMBOL_SOURCE=HGNC;HGNC_ID=17030;NEAREST=GPN1;INTRON=2/11
rs13002853	2:27853245	G	ENSG00000259080	ENST00000505973	Transcript	intron_variant,non_coding_transcript_variant	-	-	-	-	-	-	IMPACT=MODIFIER;STRAND=1;SYMBOL=RP11-158I13.2;SYMBOL_SOURCE=Clone_based_vega_gene;NEAREST=GPN1;INTRON=13/17
rs13002853	2:27853245	G	ENSG00000198522	ENST00000515877	Transcript	intron_variant	-	-	-	-	-	-	IMPACT=MODIFIER;STRAND=1;SYMBOL=GPN1;SYMBOL_SOURCE=HGNC;HGNC_ID=17030;NEAREST=GPN1;INTRON=2/13
rs13002853	2:27853245	G	ENSG00000176714	ENST00000522876	Transcript	upstream_gene_variant	-	-	-	-	-	-	IMPACT=MODIFIER;DISTANCE=1487;STRAND=-1;FLAGS=cds_end_NF;SYMBOL=CCDC121;SYMBOL_SOURCE=HGNC;HGNC_ID=25833;NEAREST=GPN1
rs13002853	2:27853245	G	ENSG00000243943	ENST00000556601	Transcript	intron_variant	-	-	-	-	-	-	IMPACT=MODIFIER;STRAND=1;SYMBOL=ZNF512;SYMBOL_SOURCE=HGNC;HGNC_ID=29380;NEAREST=GPN1;INTRON=13/17
rs13002853	2:27853245	G	ENSG00000198522	ENST00000610189	Transcript	intron_variant	-	-	-	-	-	-	IMPACT=MODIFIER;STRAND=1;SYMBOL=GPN1;SYMBOL_SOURCE=HGNC;HGNC_ID=17030;NEAREST=GPN1;INTRON=2/13
rs34502053	2:27854524	A	ENSG00000198522	ENST00000264718	Transcript	intron_variant	-	-	-	-	-	-	IMPACT=MODIFIER;STRAND=1;SYMBOL=GPN1;SYMBOL_SOURCE=HGNC;HGNC_ID=17030;NEAREST=GPN1;INTRON=3/13
rs34502053	2:27854524	A	ENSG00000176714	ENST00000324364	Transcript	upstream_gene_variant	-	-	-	-	-	-	IMPACT=MODIFIER;DISTANCE=2645;STRAND=-1;SYMBOL=CCDC121;SYMBOL_SOURCE=HGNC;HGNC_ID=25833;NEAREST=GPN1
rs34502053	2:27854524	A	ENSG00000176714	ENST00000394775	Transcript	upstream_gene_variant	-	-	-	-	-	-	IMPACT=MODIFIER;DISTANCE=2779;STRAND=-1;SYMBOL=CCDC121;SYMBOL_SOURCE=HGNC;HGNC_ID=25833;NEAREST=GPN1
rs34502053	2:27854524	A	ENSG00000198522	ENST00000407583	Transcript	intron_variant	-	-	-	-	-	-	IMPACT=MODIFIER;STRAND=1;SYMBOL=GPN1;SYMBOL_SOURCE=HGNC;HGNC_ID=17030;NEAREST=GPN1;INTRON=4/14
rs34502053	2:27854524	A	ENSG00000198522	ENST00000424214	Transcript	intron_variant	-	-	-	-	-	-	IMPACT=MODIFIER;STRAND=1;SYMBOL=GPN1;SYMBOL_SOURCE=HGNC;HGNC_ID=17030;NEAREST=GPN1;INTRON=3/13
rs34502053	2:27854524	A	ENSG00000198522	ENST00000436280	Transcript	intron_variant,NMD_transcript_variant	-	-	-	-	-	-	IMPACT=MODIFIER;STRAND=1;SYMBOL=GPN1;SYMBOL_SOURCE=HGNC;HGNC_ID=17030;NEAREST=GPN1;INTRON=2/6
rs34502053	2:27854524	A	ENSG00000198522	ENST00000458167	Transcript	intron_variant	-	-	-	-	-	-	IMPACT=MODIFIER;STRAND=1;SYMBOL=GPN1;SYMBOL_SOURCE=HGNC;HGNC_ID=17030;NEAREST=GPN1;INTRON=2/11
rs34502053	2:27854524	A	ENSG00000198522	ENST00000461249	Transcript	intron_variant,non_coding_transcript_variant	-	-	-	-	-	-	IMPACT=MODIFIER;STRAND=1;SYMBOL=GPN1;SYMBOL_SOURCE=HGNC;HGNC_ID=17030;NEAREST=GPN1;INTRON=2/10
rs34502053	2:27854524	A	ENSG00000198522	ENST00000478484	Transcript	downstream_gene_variant	-	-	-	-	-	-	IMPACT=MODIFIER;DISTANCE=17;STRAND=1;SYMBOL=GPN1;SYMBOL_SOURCE=HGNC;HGNC_ID=17030;NEAREST=GPN1
rs34502053	2:27854524	A	ENSG00000198522	ENST00000481754	Transcript	downstream_gene_variant	-	-	-	-	-	-	IMPACT=MODIFIER;DISTANCE=1730;STRAND=1;SYMBOL=GPN1;SYMBOL_SOURCE=HGNC;HGNC_ID=17030;NEAREST=GPN1
rs34502053	2:27854524	A	ENSG00000198522	ENST00000503738	Transcript	intron_variant	-	-	-	-	-	-	IMPACT=MODIFIER;STRAND=1;SYMBOL=GPN1;SYMBOL_SOURCE=HGNC;HGNC_ID=17030;NEAREST=GPN1;INTRON=2/11
rs34502053	2:27854524	A	ENSG00000259080	ENST00000505973	Transcript	intron_variant,non_coding_transcript_variant	-	-	-	-	-	-	IMPACT=MODIFIER;STRAND=1;SYMBOL=RP11-158I13.2;SYMBOL_SOURCE=Clone_based_vega_gene;NEAREST=GPN1;INTRON=14/17
rs34502053	2:27854524	A	ENSG00000198522	ENST00000515877	Transcript	intron_variant	-	-	-	-	-	-	IMPACT=MODIFIER;STRAND=1;SYMBOL=GPN1;SYMBOL_SOURCE=HGNC;HGNC_ID=17030;NEAREST=GPN1;INTRON=3/13
rs34502053	2:27854524	A	ENSG00000176714	ENST00000522876	Transcript	upstream_gene_variant	-	-	-	-	-	-	IMPACT=MODIFIER;DISTANCE=2766;STRAND=-1;FLAGS=cds_end_NF;SYMBOL=CCDC121;SYMBOL_SOURCE=HGNC;HGNC_ID=25833;NEAREST=GPN1
rs34502053	2:27854524	A	ENSG00000243943	ENST00000556601	Transcript	intron_variant	-	-	-	-	-	-	IMPACT=MODIFIER;STRAND=1;SYMBOL=ZNF512;SYMBOL_SOURCE=HGNC;HGNC_ID=29380;NEAREST=GPN1;INTRON=14/17
rs34502053	2:27854524	A	ENSG00000198522	ENST00000610189	Transcript	intron_variant	-	-	-	-	-	-	IMPACT=MODIFIER;STRAND=1;SYMBOL=GPN1;SYMBOL_SOURCE=HGNC;HGNC_ID=17030;NEAREST=GPN1;INTRON=3/13
rs6719175	2:27859351	A	ENSG00000198522	ENST00000264718	Transcript	intron_variant	-	-	-	-	-	-	IMPACT=MODIFIER;STRAND=1;SYMBOL=GPN1;SYMBOL_SOURCE=HGNC;HGNC_ID=17030;NEAREST=GPN1;INTRON=7/13
rs6719175	2:27859351	A	ENSG00000198522	ENST00000407583	Transcript	intron_variant	-	-	-	-	-	-	IMPACT=MODIFIER;STRAND=1;SYMBOL=GPN1;SYMBOL_SOURCE=HGNC;HGNC_ID=17030;NEAREST=GPN1;INTRON=8/14
rs6719175	2:27859351	A	ENSG00000198522	ENST00000424214	Transcript	intron_variant	-	-	-	-	-	-	IMPACT=MODIFIER;STRAND=1;SYMBOL=GPN1;SYMBOL_SOURCE=HGNC;HGNC_ID=17030;NEAREST=GPN1;INTRON=7/13
rs6719175	2:27859351	A	ENSG00000198522	ENST00000436280	Transcript	intron_variant,NMD_transcript_variant	-	-	-	-	-	-	IMPACT=MODIFIER;STRAND=1;SYMBOL=GPN1;SYMBOL_SOURCE=HGNC;HGNC_ID=17030;NEAREST=GPN1;INTRON=5/6
rs6719175	2:27859351	A	ENSG00000198522	ENST00000458167	Transcript	intron_variant	-	-	-	-	-	-	IMPACT=MODIFIER;STRAND=1;SYMBOL=GPN1;SYMBOL_SOURCE=HGNC;HGNC_ID=17030;NEAREST=GPN1;INTRON=5/11
rs6719175	2:27859351	A	ENSG00000198522	ENST00000461249	Transcript	intron_variant,non_coding_transcript_variant	-	-	-	-	-	-	IMPACT=MODIFIER;STRAND=1;SYMBOL=GPN1;SYMBOL_SOURCE=HGNC;HGNC_ID=17030;NEAREST=GPN1;INTRON=5/10
rs6719175	2:27859351	A	ENSG00000198522	ENST00000478484	Transcript	downstream_gene_variant	-	-	-	-	-	-	IMPACT=MODIFIER;DISTANCE=4844;STRAND=1;SYMBOL=GPN1;SYMBOL_SOURCE=HGNC;HGNC_ID=17030;NEAREST=GPN1
rs6719175	2:27859351	A	ENSG00000198522	ENST00000503738	Transcript	intron_variant	-	-	-	-	-	-	IMPACT=MODIFIER;STRAND=1;SYMBOL=GPN1;SYMBOL_SOURCE=HGNC;HGNC_ID=17030;NEAREST=GPN1;INTRON=5/11
rs6719175	2:27859351	A	ENSG00000259080	ENST00000505973	Transcript	downstream_gene_variant	-	-	-	-	-	-	IMPACT=MODIFIER;DISTANCE=1310;STRAND=1;SYMBOL=RP11-158I13.2;SYMBOL_SOURCE=Clone_based_vega_gene;NEAREST=GPN1
rs6719175	2:27859351	A	ENSG00000198522	ENST00000515877	Transcript	intron_variant	-	-	-	-	-	-	IMPACT=MODIFIER;STRAND=1;SYMBOL=GPN1;SYMBOL_SOURCE=HGNC;HGNC_ID=17030;NEAREST=GPN1;INTRON=7/13
rs6719175	2:27859351	A	ENSG00000243943	ENST00000556601	Transcript	downstream_gene_variant	-	-	-	-	-	-	IMPACT=MODIFIER;DISTANCE=1310;STRAND=1;SYMBOL=ZNF512;SYMBOL_SOURCE=HGNC;HGNC_ID=29380;NEAREST=GPN1
rs6719175	2:27859351	A	ENSG00000198522	ENST00000610189	Transcript	intron_variant	-	-	-	-	-	-	IMPACT=MODIFIER;STRAND=1;SYMBOL=GPN1;SYMBOL_SOURCE=HGNC;HGNC_ID=17030;NEAREST=GPN1;INTRON=7/13
rs2272406	2:27892023	T	ENSG00000163798	ENST00000326019	Transcript	intron_variant	-	-	-	-	-	-	IMPACT=MODIFIER;STRAND=1;SYMBOL=SLC4A1AP;SYMBOL_SOURCE=HGNC;HGNC_ID=13813;NEAREST=SUPT7L;INTRON=4/13
rs2272406	2:27892023	T	ENSG00000163798	ENST00000427424	Transcript	intron_variant,NMD_transcript_variant	-	-	-	-	-	-	IMPACT=MODIFIER;STRAND=1;FLAGS=cds_start_NF;SYMBOL=SLC4A1AP;SYMBOL_SOURCE=HGNC;HGNC_ID=13813;NEAREST=SUPT7L;INTRON=5/6
rs13021208	2:27901728	T	ENSG00000163798	ENST00000326019	Transcript	intron_variant	-	-	-	-	-	-	IMPACT=MODIFIER;STRAND=1;SYMBOL=SLC4A1AP;SYMBOL_SOURCE=HGNC;HGNC_ID=13813;NEAREST=SUPT7L;INTRON=8/13
rs13021208	2:27901728	T	ENSG00000163798	ENST00000427424	Transcript	downstream_gene_variant	-	-	-	-	-	-	IMPACT=MODIFIER;DISTANCE=3169;STRAND=1;FLAGS=cds_start_NF;SYMBOL=SLC4A1AP;SYMBOL_SOURCE=HGNC;HGNC_ID=13813;NEAREST=SUPT7L
rs13023094	2:27910706	C	ENSG00000163798	ENST00000326019	Transcript	intron_variant	-	-	-	-	-	-	IMPACT=MODIFIER;STRAND=1;SYMBOL=SLC4A1AP;SYMBOL_SOURCE=HGNC;HGNC_ID=13813;NEAREST=SUPT7L;INTRON=10/13
rs13023094	2:27910706	C	ENSG00000163798	ENST00000492196	Transcript	upstream_gene_variant	-	-	-	-	-	-	IMPACT=MODIFIER;DISTANCE=3719;STRAND=1;SYMBOL=SLC4A1AP;SYMBOL_SOURCE=HGNC;HGNC_ID=13813;NEAREST=SUPT7L
rs12998770	2:27913188	C	ENSG00000163798	ENST00000326019	Transcript	intron_variant	-	-	-	-	-	-	IMPACT=MODIFIER;STRAND=1;SYMBOL=SLC4A1AP;SYMBOL_SOURCE=HGNC;HGNC_ID=13813;NEAREST=AC074091.13;INTRON=12/13
rs12998770	2:27913188	C	ENSG00000163798	ENST00000492196	Transcript	upstream_gene_variant	-	-	-	-	-	-	IMPACT=MODIFIER;DISTANCE=1237;STRAND=1;SYMBOL=SLC4A1AP;SYMBOL_SOURCE=HGNC;HGNC_ID=13813;NEAREST=AC074091.13
rs13030973	2:27928797	C	ENSG00000205334	ENST00000379677	Transcript	3_prime_UTR_variant	2716	-	-	-	-	-	IMPACT=MODIFIER;STRAND=-1;SYMBOL=AC074091.13;SYMBOL_SOURCE=Clone_based_vega_gene;NEAREST=AC074091.13;EXON=2/2
rs13030973	2:27928797	C	-	ENSR00000383836	RegulatoryFeature	regulatory_region_variant	-	-	-	-	-	-	IMPACT=MODIFIER;NEAREST=AC074091.13;BIOTYPE=enhancer
rs13030973	2:27928797	C	-	MA0491.1	MotifFeature	TF_binding_site_variant	-	-	-	-	-	-	IMPACT=MODIFIER;STRAND=-1;NEAREST=AC074091.13;MOTIF_NAME=Jund:MA0491.1;MOTIF_POS=9;HIGH_INF_POS=Y;MOTIF_SCORE_CHANGE=-0.109
rs6727388	2:27932587	G	ENSG00000205334	ENST00000379677	Transcript	intron_variant	-	-	-	-	-	-	IMPACT=MODIFIER;STRAND=-1;SYMBOL=AC074091.13;SYMBOL_SOURCE=Clone_based_vega_gene;NEAREST=AC074091.13;INTRON=1/1
rs4616435	2:27933642	T	ENSG00000205334	ENST00000379677	Transcript	intron_variant	-	-	-	-	-	-	IMPACT=MODIFIER;STRAND=-1;SYMBOL=AC074091.13;SYMBOL_SOURCE=Clone_based_vega_gene;NEAREST=AC074091.13;INTRON=1/1
rs6727215	2:27934731	A	ENSG00000205334	ENST00000379677	Transcript	intron_variant	-	-	-	-	-	-	IMPACT=MODIFIER;STRAND=-1;SYMBOL=AC074091.13;SYMBOL_SOURCE=Clone_based_vega_gene;NEAREST=AC074091.13;INTRON=1/1
rs10432705	2:27950837	A	-	-	-	intergenic_variant	-	-	-	-	-	-	IMPACT=MODIFIER;NEAREST=AC074091.13
rs1317580	2:27961344	C	-	ENSR00000114461	RegulatoryFeature	regulatory_region_variant	-	-	-	-	-	-	IMPACT=MODIFIER;NEAREST=AC074091.13;BIOTYPE=promoter_flanking_region
rs1317580	2:27961344	C	-	-	-	intergenic_variant	-	-	-	-	-	-	IMPACT=MODIFIER;NEAREST=AC074091.13
rs13023194	2:27967260	C	-	-	-	intergenic_variant	-	-	-	-	-	-	IMPACT=MODIFIER;NEAREST=MRPL33
rs13006480	2:27987221	G	-	-	-	intergenic_variant	-	-	-	-	-	-	IMPACT=MODIFIER;NEAREST=MRPL33
rs13030345	2:28003174	T	ENSG00000243147	ENST00000296102	Transcript	downstream_gene_variant	-	-	-	-	-	-	IMPACT=MODIFIER;DISTANCE=566;STRAND=1;SYMBOL=MRPL33;SYMBOL_SOURCE=HGNC;HGNC_ID=14487;NEAREST=AC110084.1
rs13030345	2:28003174	T	ENSG00000171174	ENST00000302188	Transcript	downstream_gene_variant	-	-	-	-	-	-	IMPACT=MODIFIER;DISTANCE=1057;STRAND=-1;SYMBOL=RBKS;SYMBOL_SOURCE=HGNC;HGNC_ID=30325;NEAREST=AC110084.1
rs13030345	2:28003174	T	ENSG00000243147	ENST00000379666	Transcript	downstream_gene_variant	-	-	-	-	-	-	IMPACT=MODIFIER;DISTANCE=573;STRAND=1;SYMBOL=MRPL33;SYMBOL_SOURCE=HGNC;HGNC_ID=14487;NEAREST=AC110084.1
rs13030345	2:28003174	T	ENSG00000243147	ENST00000448427	Transcript	intron_variant,NMD_transcript_variant	-	-	-	-	-	-	IMPACT=MODIFIER;STRAND=1;SYMBOL=MRPL33;SYMBOL_SOURCE=HGNC;HGNC_ID=14487;NEAREST=AC110084.1;INTRON=2/5
rs13030345	2:28003174	T	ENSG00000171174	ENST00000449378	Transcript	downstream_gene_variant	-	-	-	-	-	-	IMPACT=MODIFIER;DISTANCE=1266;STRAND=-1;SYMBOL=RBKS;SYMBOL_SOURCE=HGNC;HGNC_ID=30325;NEAREST=AC110084.1
rs13030345	2:28003174	T	ENSG00000243147	ENST00000476552	Transcript	downstream_gene_variant	-	-	-	-	-	-	IMPACT=MODIFIER;DISTANCE=610;STRAND=1;SYMBOL=MRPL33;SYMBOL_SOURCE=HGNC;HGNC_ID=14487;NEAREST=AC110084.1
rs13030345	2:28003174	T	ENSG00000243147	ENST00000483992	Transcript	downstream_gene_variant	-	-	-	-	-	-	IMPACT=MODIFIER;DISTANCE=576;STRAND=1;SYMBOL=MRPL33;SYMBOL_SOURCE=HGNC;HGNC_ID=14487;NEAREST=AC110084.1
rs13030345	2:28003174	T	ENSG00000268656	ENST00000601759	Transcript	intron_variant	-	-	-	-	-	-	IMPACT=MODIFIER;STRAND=-1;SYMBOL=AC110084.1;SYMBOL_SOURCE=Clone_based_ensembl_gene;NEAREST=AC110084.1;INTRON=2/2
rs13030345	2:28003174	T	-	ENSR00000114472	RegulatoryFeature	regulatory_region_variant	-	-	-	-	-	-	IMPACT=MODIFIER;NEAREST=AC110084.1;BIOTYPE=enhancer
rs74446114	2:28066122	C	ENSG00000171174	ENST00000302188	Transcript	intron_variant	-	-	-	-	-	-	IMPACT=MODIFIER;STRAND=-1;SYMBOL=RBKS;SYMBOL_SOURCE=HGNC;HGNC_ID=30325;NEAREST=RBKS;INTRON=4/7
rs74446114	2:28066122	C	ENSG00000171174	ENST00000444339	Transcript	intron_variant	-	-	-	-	-	-	IMPACT=MODIFIER;STRAND=-1;SYMBOL=RBKS;SYMBOL_SOURCE=HGNC;HGNC_ID=30325;NEAREST=RBKS;INTRON=4/7
rs74446114	2:28066122	C	ENSG00000243147	ENST00000448427	Transcript	intron_variant,NMD_transcript_variant	-	-	-	-	-	-	IMPACT=MODIFIER;STRAND=1;SYMBOL=MRPL33;SYMBOL_SOURCE=HGNC;HGNC_ID=14487;NEAREST=RBKS;INTRON=3/5
rs74446114	2:28066122	C	ENSG00000171174	ENST00000449378	Transcript	intron_variant,NMD_transcript_variant	-	-	-	-	-	-	IMPACT=MODIFIER;STRAND=-1;SYMBOL=RBKS;SYMBOL_SOURCE=HGNC;HGNC_ID=30325;NEAREST=RBKS;INTRON=5/8
rs74446114	2:28066122	C	ENSG00000171174	ENST00000458185	Transcript	upstream_gene_variant	-	-	-	-	-	-	IMPACT=MODIFIER;DISTANCE=94;STRAND=-1;FLAGS=cds_start_NF;SYMBOL=RBKS;SYMBOL_SOURCE=HGNC;HGNC_ID=30325;NEAREST=RBKS
rs77353560	2:28085544	A	ENSG00000171174	ENST00000302188	Transcript	intron_variant	-	-	-	-	-	-	IMPACT=MODIFIER;STRAND=-1;SYMBOL=RBKS;SYMBOL_SOURCE=HGNC;HGNC_ID=30325;NEAREST=RBKS;INTRON=1/7
rs77353560	2:28085544	A	ENSG00000171174	ENST00000444339	Transcript	intron_variant	-	-	-	-	-	-	IMPACT=MODIFIER;STRAND=-1;SYMBOL=RBKS;SYMBOL_SOURCE=HGNC;HGNC_ID=30325;NEAREST=RBKS;INTRON=1/7
rs77353560	2:28085544	A	ENSG00000243147	ENST00000448427	Transcript	intron_variant,NMD_transcript_variant	-	-	-	-	-	-	IMPACT=MODIFIER;STRAND=1;SYMBOL=MRPL33;SYMBOL_SOURCE=HGNC;HGNC_ID=14487;NEAREST=RBKS;INTRON=3/5
rs77353560	2:28085544	A	ENSG00000171174	ENST00000449378	Transcript	intron_variant,NMD_transcript_variant	-	-	-	-	-	-	IMPACT=MODIFIER;STRAND=-1;SYMBOL=RBKS;SYMBOL_SOURCE=HGNC;HGNC_ID=30325;NEAREST=RBKS;INTRON=2/8
rs77353560	2:28085544	A	ENSG00000171174	ENST00000453412	Transcript	intron_variant,NMD_transcript_variant	-	-	-	-	-	-	IMPACT=MODIFIER;STRAND=-1;SYMBOL=RBKS;SYMBOL_SOURCE=HGNC;HGNC_ID=30325;NEAREST=RBKS;INTRON=1/2
rs2305929	2:28113911	G	ENSG00000171174	ENST00000302188	Transcript	5_prime_UTR_variant	55	-	-	-	-	-	IMPACT=MODIFIER;STRAND=-1;SYMBOL=RBKS;SYMBOL_SOURCE=HGNC;HGNC_ID=30325;NEAREST=RBKS;EXON=1/8
rs2305929	2:28113911	G	ENSG00000158019	ENST00000342045	Transcript	intron_variant	-	-	-	-	-	-	IMPACT=MODIFIER;STRAND=1;SYMBOL=BRE;SYMBOL_SOURCE=HGNC;HGNC_ID=1106;NEAREST=RBKS;INTRON=1/12
rs2305929	2:28113911	G	ENSG00000158019	ENST00000344773	Transcript	intron_variant	-	-	-	-	-	-	IMPACT=MODIFIER;STRAND=1;SYMBOL=BRE;SYMBOL_SOURCE=HGNC;HGNC_ID=1106;NEAREST=RBKS;INTRON=1/12
rs2305929	2:28113911	G	ENSG00000158019	ENST00000361704	Transcript	intron_variant	-	-	-	-	-	-	IMPACT=MODIFIER;STRAND=1;SYMBOL=BRE;SYMBOL_SOURCE=HGNC;HGNC_ID=1106;NEAREST=RBKS;INTRON=1/12
rs2305929	2:28113911	G	ENSG00000158019	ENST00000379624	Transcript	intron_variant	-	-	-	-	-	-	IMPACT=MODIFIER;STRAND=1;SYMBOL=BRE;SYMBOL_SOURCE=HGNC;HGNC_ID=1106;NEAREST=RBKS;INTRON=1/11
rs2305929	2:28113911	G	ENSG00000158019	ENST00000379629	Transcript	upstream_gene_variant	-	-	-	-	-	-	IMPACT=MODIFIER;DISTANCE=3501;STRAND=1;FLAGS=cds_end_NF;SYMBOL=BRE;SYMBOL_SOURCE=HGNC;HGNC_ID=1106;NEAREST=RBKS
rs2305929	2:28113911	G	ENSG00000158019	ENST00000379632	Transcript	intron_variant	-	-	-	-	-	-	IMPACT=MODIFIER;STRAND=1;SYMBOL=BRE;SYMBOL_SOURCE=HGNC;HGNC_ID=1106;NEAREST=RBKS;INTRON=1/13
rs2305929	2:28113911	G	ENSG00000158019	ENST00000436924	Transcript	intron_variant	-	-	-	-	-	-	IMPACT=MODIFIER;STRAND=1;FLAGS=cds_end_NF;SYMBOL=BRE;SYMBOL_SOURCE=HGNC;HGNC_ID=1106;NEAREST=RBKS;INTRON=1/5
rs2305929	2:28113911	G	ENSG00000171174	ENST00000444339	Transcript	upstream_gene_variant	-	-	-	-	-	-	IMPACT=MODIFIER;DISTANCE=694;STRAND=-1;SYMBOL=RBKS;SYMBOL_SOURCE=HGNC;HGNC_ID=30325;NEAREST=RBKS
rs2305929	2:28113911	G	ENSG00000243147	ENST00000448427	Transcript	intron_variant,NMD_transcript_variant	-	-	-	-	-	-	IMPACT=MODIFIER;STRAND=1;SYMBOL=MRPL33;SYMBOL_SOURCE=HGNC;HGNC_ID=14487;NEAREST=RBKS;INTRON=3/5
rs2305929	2:28113911	G	ENSG00000171174	ENST00000449378	Transcript	upstream_gene_variant	-	-	-	-	-	-	IMPACT=MODIFIER;DISTANCE=678;STRAND=-1;SYMBOL=RBKS;SYMBOL_SOURCE=HGNC;HGNC_ID=30325;NEAREST=RBKS
rs2305929	2:28113911	G	ENSG00000171174	ENST00000453412	Transcript	upstream_gene_variant	-	-	-	-	-	-	IMPACT=MODIFIER;DISTANCE=363;STRAND=-1;SYMBOL=RBKS;SYMBOL_SOURCE=HGNC;HGNC_ID=30325;NEAREST=RBKS
rs2305929	2:28113911	G	ENSG00000158019	ENST00000492702	Transcript	intron_variant,non_coding_transcript_variant	-	-	-	-	-	-	IMPACT=MODIFIER;STRAND=1;SYMBOL=BRE;SYMBOL_SOURCE=HGNC;HGNC_ID=1106;NEAREST=RBKS;INTRON=1/1
rs2305929	2:28113911	G	ENSG00000158019	ENST00000496951	Transcript	intron_variant,non_coding_transcript_variant	-	-	-	-	-	-	IMPACT=MODIFIER;STRAND=1;SYMBOL=BRE;SYMBOL_SOURCE=HGNC;HGNC_ID=1106;NEAREST=RBKS;INTRON=1/2
rs2305929	2:28113911	G	ENSG00000158019	ENST00000603461	Transcript	intron_variant,non_coding_transcript_variant	-	-	-	-	-	-	IMPACT=MODIFIER;STRAND=1;SYMBOL=BRE;SYMBOL_SOURCE=HGNC;HGNC_ID=1106;NEAREST=RBKS;INTRON=1/3
rs2305929	2:28113911	G	ENSG00000158019	ENST00000604932	Transcript	upstream_gene_variant	-	-	-	-	-	-	IMPACT=MODIFIER;DISTANCE=3576;STRAND=1;FLAGS=cds_start_NF;SYMBOL=BRE;SYMBOL_SOURCE=HGNC;HGNC_ID=1106;NEAREST=RBKS
rs2305929	2:28113911	G	-	ENSR00000114497	RegulatoryFeature	regulatory_region_variant	-	-	-	-	-	-	IMPACT=MODIFIER;NEAREST=RBKS;BIOTYPE=promoter
rs55807911	2:28421473	C	ENSG00000158019	ENST00000342045	Transcript	intron_variant	-	-	-	-	-	-	IMPACT=MODIFIER;STRAND=1;SYMBOL=BRE;SYMBOL_SOURCE=HGNC;HGNC_ID=1106;NEAREST=FOSL2;INTRON=8/12
rs55807911	2:28421473	C	ENSG00000158019	ENST00000344773	Transcript	intron_variant	-	-	-	-	-	-	IMPACT=MODIFIER;STRAND=1;SYMBOL=BRE;SYMBOL_SOURCE=HGNC;HGNC_ID=1106;NEAREST=FOSL2;INTRON=7/12
rs55807911	2:28421473	C	ENSG00000158019	ENST00000361704	Transcript	intron_variant	-	-	-	-	-	-	IMPACT=MODIFIER;STRAND=1;SYMBOL=BRE;SYMBOL_SOURCE=HGNC;HGNC_ID=1106;NEAREST=FOSL2;INTRON=7/12
rs55807911	2:28421473	C	ENSG00000158019	ENST00000379624	Transcript	intron_variant	-	-	-	-	-	-	IMPACT=MODIFIER;STRAND=1;SYMBOL=BRE;SYMBOL_SOURCE=HGNC;HGNC_ID=1106;NEAREST=FOSL2;INTRON=7/11
rs55807911	2:28421473	C	ENSG00000158019	ENST00000379629	Transcript	intron_variant	-	-	-	-	-	-	IMPACT=MODIFIER;STRAND=1;FLAGS=cds_end_NF;SYMBOL=BRE;SYMBOL_SOURCE=HGNC;HGNC_ID=1106;NEAREST=FOSL2;INTRON=6/6
rs55807911	2:28421473	C	ENSG00000158019	ENST00000379632	Transcript	intron_variant	-	-	-	-	-	-	IMPACT=MODIFIER;STRAND=1;SYMBOL=BRE;SYMBOL_SOURCE=HGNC;HGNC_ID=1106;NEAREST=FOSL2;INTRON=8/13
rs72807818	2:51819019	A	ENSG00000231918	ENST00000440698	Transcript	intron_variant,non_coding_transcript_variant	-	-	-	-	-	-	IMPACT=MODIFIER;STRAND=1;SYMBOL=AC007682.1;SYMBOL_SOURCE=Clone_based_vega_gene;NEAREST=NRXN1;INTRON=5/10
rs13010288	2:51824512	T	ENSG00000231918	ENST00000440698	Transcript	intron_variant,non_coding_transcript_variant	-	-	-	-	-	-	IMPACT=MODIFIER;STRAND=1;SYMBOL=AC007682.1;SYMBOL_SOURCE=Clone_based_vega_gene;NEAREST=NRXN1;INTRON=5/10
rs1400105	2:51901360	G	ENSG00000231918	ENST00000440698	Transcript	intron_variant,non_coding_transcript_variant	-	-	-	-	-	-	IMPACT=MODIFIER;STRAND=1;SYMBOL=AC007682.1;SYMBOL_SOURCE=Clone_based_vega_gene;NEAREST=NRXN1;INTRON=5/10
rs1516183	2:51904189	G	ENSG00000231918	ENST00000440698	Transcript	intron_variant,non_coding_transcript_variant	-	-	-	-	-	-	IMPACT=MODIFIER;STRAND=1;SYMBOL=AC007682.1;SYMBOL_SOURCE=Clone_based_vega_gene;NEAREST=NRXN1;INTRON=5/10
rs2176220	2:51904737	G	ENSG00000231918	ENST00000440698	Transcript	intron_variant,non_coding_transcript_variant	-	-	-	-	-	-	IMPACT=MODIFIER;STRAND=1;SYMBOL=AC007682.1;SYMBOL_SOURCE=Clone_based_vega_gene;NEAREST=NRXN1;INTRON=5/10
rs959661	2:51908399	C	ENSG00000231918	ENST00000440698	Transcript	intron_variant,non_coding_transcript_variant	-	-	-	-	-	-	IMPACT=MODIFIER;STRAND=1;SYMBOL=AC007682.1;SYMBOL_SOURCE=Clone_based_vega_gene;NEAREST=NRXN1;INTRON=5/10
rs4146702	2:51909213	C	ENSG00000231918	ENST00000440698	Transcript	intron_variant,non_coding_transcript_variant	-	-	-	-	-	-	IMPACT=MODIFIER;STRAND=1;SYMBOL=AC007682.1;SYMBOL_SOURCE=Clone_based_vega_gene;NEAREST=NRXN1;INTRON=5/10
rs6753905	2:51920417	C	ENSG00000231918	ENST00000440698	Transcript	intron_variant,non_coding_transcript_variant	-	-	-	-	-	-	IMPACT=MODIFIER;STRAND=1;SYMBOL=AC007682.1;SYMBOL_SOURCE=Clone_based_vega_gene;NEAREST=NRXN1;INTRON=5/10
rs6739137	2:51920657	A	ENSG00000231918	ENST00000440698	Transcript	intron_variant,non_coding_transcript_variant	-	-	-	-	-	-	IMPACT=MODIFIER;STRAND=1;SYMBOL=AC007682.1;SYMBOL_SOURCE=Clone_based_vega_gene;NEAREST=NRXN1;INTRON=5/10
rs9973354	2:51929410	C	ENSG00000231918	ENST00000440698	Transcript	intron_variant,non_coding_transcript_variant	-	-	-	-	-	-	IMPACT=MODIFIER;STRAND=1;SYMBOL=AC007682.1;SYMBOL_SOURCE=Clone_based_vega_gene;NEAREST=NRXN1;INTRON=5/10
rs1516187	2:51930164	C	ENSG00000231918	ENST00000440698	Transcript	intron_variant,non_coding_transcript_variant	-	-	-	-	-	-	IMPACT=MODIFIER;STRAND=1;SYMBOL=AC007682.1;SYMBOL_SOURCE=Clone_based_vega_gene;NEAREST=NRXN1;INTRON=5/10
rs1356213	2:51930649	A	ENSG00000231918	ENST00000440698	Transcript	intron_variant,non_coding_transcript_variant	-	-	-	-	-	-	IMPACT=MODIFIER;STRAND=1;SYMBOL=AC007682.1;SYMBOL_SOURCE=Clone_based_vega_gene;NEAREST=NRXN1;INTRON=5/10
rs1516179	2:51931964	C	ENSG00000231918	ENST00000440698	Transcript	intron_variant,non_coding_transcript_variant	-	-	-	-	-	-	IMPACT=MODIFIER;STRAND=1;SYMBOL=AC007682.1;SYMBOL_SOURCE=Clone_based_vega_gene;NEAREST=NRXN1;INTRON=5/10
rs1516180	2:51932130	C	ENSG00000231918	ENST00000440698	Transcript	intron_variant,non_coding_transcript_variant	-	-	-	-	-	-	IMPACT=MODIFIER;STRAND=1;SYMBOL=AC007682.1;SYMBOL_SOURCE=Clone_based_vega_gene;NEAREST=NRXN1;INTRON=5/10
rs4353689	2:51935326	C	ENSG00000231918	ENST00000440698	Transcript	intron_variant,non_coding_transcript_variant	-	-	-	-	-	-	IMPACT=MODIFIER;STRAND=1;SYMBOL=AC007682.1;SYMBOL_SOURCE=Clone_based_vega_gene;NEAREST=NRXN1;INTRON=5/10
rs10182761	2:51935844	C	ENSG00000231918	ENST00000440698	Transcript	intron_variant,non_coding_transcript_variant	-	-	-	-	-	-	IMPACT=MODIFIER;STRAND=1;SYMBOL=AC007682.1;SYMBOL_SOURCE=Clone_based_vega_gene;NEAREST=NRXN1;INTRON=5/10
rs12613825	2:51936388	C	ENSG00000231918	ENST00000440698	Transcript	intron_variant,non_coding_transcript_variant	-	-	-	-	-	-	IMPACT=MODIFIER;STRAND=1;SYMBOL=AC007682.1;SYMBOL_SOURCE=Clone_based_vega_gene;NEAREST=NRXN1;INTRON=5/10
rs777585	2:61412559	T	ENSG00000173209	ENST00000357022	Transcript	intron_variant	-	-	-	-	-	-	IMPACT=MODIFIER;STRAND=1;SYMBOL=AHSA2;SYMBOL_SOURCE=HGNC;HGNC_ID=20437;NEAREST=AHSA2;INTRON=4/6
rs777585	2:61412559	T	ENSG00000173209	ENST00000394457	Transcript	intron_variant	-	-	-	-	-	-	IMPACT=MODIFIER;STRAND=1;SYMBOL=AHSA2;SYMBOL_SOURCE=HGNC;HGNC_ID=20437;NEAREST=AHSA2;INTRON=3/5
rs777585	2:61412559	T	ENSG00000115464	ENST00000398571	Transcript	downstream_gene_variant	-	-	-	-	-	-	IMPACT=MODIFIER;DISTANCE=2039;STRAND=-1;SYMBOL=USP34;SYMBOL_SOURCE=HGNC;HGNC_ID=20066;NEAREST=AHSA2
rs777585	2:61412559	T	ENSG00000173209	ENST00000410073	Transcript	intron_variant	-	-	-	-	-	-	IMPACT=MODIFIER;STRAND=1;SYMBOL=AHSA2;SYMBOL_SOURCE=HGNC;HGNC_ID=20437;NEAREST=AHSA2;INTRON=1/4
rs777585	2:61412559	T	ENSG00000115464	ENST00000411912	Transcript	downstream_gene_variant	-	-	-	-	-	-	IMPACT=MODIFIER;DISTANCE=2039;STRAND=-1;FLAGS=cds_start_NF;SYMBOL=USP34;SYMBOL_SOURCE=HGNC;HGNC_ID=20066;NEAREST=AHSA2
rs777585	2:61412559	T	ENSG00000115464	ENST00000436269	Transcript	downstream_gene_variant	-	-	-	-	-	-	IMPACT=MODIFIER;DISTANCE=2126;STRAND=-1;FLAGS=cds_start_NF;SYMBOL=USP34;SYMBOL_SOURCE=HGNC;HGNC_ID=20066;NEAREST=AHSA2
rs777585	2:61412559	T	ENSG00000115464	ENST00000463046	Transcript	downstream_gene_variant	-	-	-	-	-	-	IMPACT=MODIFIER;DISTANCE=3853;STRAND=-1;SYMBOL=USP34;SYMBOL_SOURCE=HGNC;HGNC_ID=20066;NEAREST=AHSA2
rs777585	2:61412559	T	ENSG00000173209	ENST00000463681	Transcript	downstream_gene_variant	-	-	-	-	-	-	IMPACT=MODIFIER;DISTANCE=4099;STRAND=1;SYMBOL=AHSA2;SYMBOL_SOURCE=HGNC;HGNC_ID=20437;NEAREST=AHSA2
rs777585	2:61412559	T	ENSG00000173209	ENST00000471542	Transcript	intron_variant,non_coding_transcript_variant	-	-	-	-	-	-	IMPACT=MODIFIER;STRAND=1;SYMBOL=AHSA2;SYMBOL_SOURCE=HGNC;HGNC_ID=20437;NEAREST=AHSA2;INTRON=3/4
rs777585	2:61412559	T	ENSG00000173209	ENST00000484217	Transcript	intron_variant,non_coding_transcript_variant	-	-	-	-	-	-	IMPACT=MODIFIER;STRAND=1;SYMBOL=AHSA2;SYMBOL_SOURCE=HGNC;HGNC_ID=20437;NEAREST=AHSA2;INTRON=2/3
rs777585	2:61412559	T	ENSG00000173209	ENST00000487904	Transcript	intron_variant,non_coding_transcript_variant	-	-	-	-	-	-	IMPACT=MODIFIER;STRAND=1;SYMBOL=AHSA2;SYMBOL_SOURCE=HGNC;HGNC_ID=20437;NEAREST=AHSA2;INTRON=3/3
rs777585	2:61412559	T	ENSG00000173209	ENST00000489653	Transcript	intron_variant,non_coding_transcript_variant	-	-	-	-	-	-	IMPACT=MODIFIER;STRAND=1;SYMBOL=AHSA2;SYMBOL_SOURCE=HGNC;HGNC_ID=20437;NEAREST=AHSA2;INTRON=5/8
rs777585	2:61412559	T	ENSG00000115464	ENST00000490552	Transcript	downstream_gene_variant	-	-	-	-	-	-	IMPACT=MODIFIER;DISTANCE=4030;STRAND=-1;SYMBOL=USP34;SYMBOL_SOURCE=HGNC;HGNC_ID=20066;NEAREST=AHSA2
rs777585	2:61412559	T	ENSG00000173209	ENST00000491217	Transcript	upstream_gene_variant	-	-	-	-	-	-	IMPACT=MODIFIER;DISTANCE=102;STRAND=1;SYMBOL=AHSA2;SYMBOL_SOURCE=HGNC;HGNC_ID=20437;NEAREST=AHSA2
rs777585	2:61412559	T	ENSG00000115464	ENST00000492604	Transcript	downstream_gene_variant	-	-	-	-	-	-	IMPACT=MODIFIER;DISTANCE=3050;STRAND=-1;SYMBOL=USP34;SYMBOL_SOURCE=HGNC;HGNC_ID=20066;NEAREST=AHSA2
rs777585	2:61412559	T	ENSG00000173209	ENST00000493310	Transcript	downstream_gene_variant	-	-	-	-	-	-	IMPACT=MODIFIER;DISTANCE=3744;STRAND=1;SYMBOL=AHSA2;SYMBOL_SOURCE=HGNC;HGNC_ID=20437;NEAREST=AHSA2
rs777585	2:61412559	T	ENSG00000173209	ENST00000493628	Transcript	intron_variant,non_coding_transcript_variant	-	-	-	-	-	-	IMPACT=MODIFIER;STRAND=1;SYMBOL=AHSA2;SYMBOL_SOURCE=HGNC;HGNC_ID=20437;NEAREST=AHSA2;INTRON=3/5
rs777590	2:61417145	G	ENSG00000173209	ENST00000357022	Transcript	downstream_gene_variant	-	-	-	-	-	-	IMPACT=MODIFIER;DISTANCE=2459;STRAND=1;SYMBOL=AHSA2;SYMBOL_SOURCE=HGNC;HGNC_ID=20437;NEAREST=AHSA2
rs777590	2:61417145	G	ENSG00000173209	ENST00000394457	Transcript	3_prime_UTR_variant	5381	-	-	-	-	-	IMPACT=MODIFIER;STRAND=1;SYMBOL=AHSA2;SYMBOL_SOURCE=HGNC;HGNC_ID=20437;NEAREST=AHSA2;EXON=6/6
rs777590	2:61417145	G	ENSG00000115464	ENST00000398571	Transcript	intron_variant	-	-	-	-	-	-	IMPACT=MODIFIER;STRAND=-1;SYMBOL=USP34;SYMBOL_SOURCE=HGNC;HGNC_ID=20066;NEAREST=AHSA2;INTRON=78/79
rs777590	2:61417145	G	ENSG00000173209	ENST00000410073	Transcript	downstream_gene_variant	-	-	-	-	-	-	IMPACT=MODIFIER;DISTANCE=3200;STRAND=1;SYMBOL=AHSA2;SYMBOL_SOURCE=HGNC;HGNC_ID=20437;NEAREST=AHSA2
rs777590	2:61417145	G	ENSG00000115464	ENST00000411912	Transcript	intron_variant	-	-	-	-	-	-	IMPACT=MODIFIER;STRAND=-1;FLAGS=cds_start_NF;SYMBOL=USP34;SYMBOL_SOURCE=HGNC;HGNC_ID=20066;NEAREST=AHSA2;INTRON=24/25
rs777590	2:61417145	G	ENSG00000115464	ENST00000436269	Transcript	intron_variant	-	-	-	-	-	-	IMPACT=MODIFIER;STRAND=-1;FLAGS=cds_start_NF;SYMBOL=USP34;SYMBOL_SOURCE=HGNC;HGNC_ID=20066;NEAREST=AHSA2;INTRON=5/6
rs777590	2:61417145	G	ENSG00000115464	ENST00000463046	Transcript	non_coding_transcript_exon_variant	5574	-	-	-	-	-	IMPACT=MODIFIER;STRAND=-1;SYMBOL=USP34;SYMBOL_SOURCE=HGNC;HGNC_ID=20066;NEAREST=AHSA2;EXON=28/28
rs777590	2:61417145	G	ENSG00000173209	ENST00000471542	Transcript	downstream_gene_variant	-	-	-	-	-	-	IMPACT=MODIFIER;DISTANCE=3098;STRAND=1;SYMBOL=AHSA2;SYMBOL_SOURCE=HGNC;HGNC_ID=20437;NEAREST=AHSA2
rs777590	2:61417145	G	ENSG00000173209	ENST00000484217	Transcript	downstream_gene_variant	-	-	-	-	-	-	IMPACT=MODIFIER;DISTANCE=3203;STRAND=1;SYMBOL=AHSA2;SYMBOL_SOURCE=HGNC;HGNC_ID=20437;NEAREST=AHSA2
rs777590	2:61417145	G	ENSG00000173209	ENST00000487904	Transcript	downstream_gene_variant	-	-	-	-	-	-	IMPACT=MODIFIER;DISTANCE=4264;STRAND=1;SYMBOL=AHSA2;SYMBOL_SOURCE=HGNC;HGNC_ID=20437;NEAREST=AHSA2
rs777590	2:61417145	G	ENSG00000173209	ENST00000489653	Transcript	downstream_gene_variant	-	-	-	-	-	-	IMPACT=MODIFIER;DISTANCE=3097;STRAND=1;SYMBOL=AHSA2;SYMBOL_SOURCE=HGNC;HGNC_ID=20437;NEAREST=AHSA2
rs777590	2:61417145	G	ENSG00000115464	ENST00000490552	Transcript	non_coding_transcript_exon_variant	1237	-	-	-	-	-	IMPACT=MODIFIER;STRAND=-1;SYMBOL=USP34;SYMBOL_SOURCE=HGNC;HGNC_ID=20066;NEAREST=AHSA2;EXON=2/2
rs777590	2:61417145	G	ENSG00000173209	ENST00000491217	Transcript	downstream_gene_variant	-	-	-	-	-	-	IMPACT=MODIFIER;DISTANCE=3235;STRAND=1;SYMBOL=AHSA2;SYMBOL_SOURCE=HGNC;HGNC_ID=20437;NEAREST=AHSA2
rs777590	2:61417145	G	ENSG00000115464	ENST00000492604	Transcript	upstream_gene_variant	-	-	-	-	-	-	IMPACT=MODIFIER;DISTANCE=214;STRAND=-1;SYMBOL=USP34;SYMBOL_SOURCE=HGNC;HGNC_ID=20066;NEAREST=AHSA2
rs777590	2:61417145	G	ENSG00000173209	ENST00000493628	Transcript	downstream_gene_variant	-	-	-	-	-	-	IMPACT=MODIFIER;DISTANCE=3203;STRAND=1;SYMBOL=AHSA2;SYMBOL_SOURCE=HGNC;HGNC_ID=20437;NEAREST=AHSA2
rs777590	2:61417145	G	ENSG00000115464	ENST00000498268	Transcript	downstream_gene_variant	-	-	-	-	-	-	IMPACT=MODIFIER;DISTANCE=617;STRAND=-1;SYMBOL=USP34;SYMBOL_SOURCE=HGNC;HGNC_ID=20066;NEAREST=AHSA2
rs777591	2:61417617	G	ENSG00000173209	ENST00000357022	Transcript	downstream_gene_variant	-	-	-	-	-	-	IMPACT=MODIFIER;DISTANCE=2931;STRAND=1;SYMBOL=AHSA2;SYMBOL_SOURCE=HGNC;HGNC_ID=20437;NEAREST=AHSA2
rs777591	2:61417617	G	ENSG00000173209	ENST00000394457	Transcript	3_prime_UTR_variant	5853	-	-	-	-	-	IMPACT=MODIFIER;STRAND=1;SYMBOL=AHSA2;SYMBOL_SOURCE=HGNC;HGNC_ID=20437;NEAREST=AHSA2;EXON=6/6
rs777591	2:61417617	G	ENSG00000115464	ENST00000398571	Transcript	intron_variant	-	-	-	-	-	-	IMPACT=MODIFIER;STRAND=-1;SYMBOL=USP34;SYMBOL_SOURCE=HGNC;HGNC_ID=20066;NEAREST=AHSA2;INTRON=77/79
rs777591	2:61417617	G	ENSG00000173209	ENST00000410073	Transcript	downstream_gene_variant	-	-	-	-	-	-	IMPACT=MODIFIER;DISTANCE=3672;STRAND=1;SYMBOL=AHSA2;SYMBOL_SOURCE=HGNC;HGNC_ID=20437;NEAREST=AHSA2
rs777591	2:61417617	G	ENSG00000115464	ENST00000411912	Transcript	intron_variant	-	-	-	-	-	-	IMPACT=MODIFIER;STRAND=-1;FLAGS=cds_start_NF;SYMBOL=USP34;SYMBOL_SOURCE=HGNC;HGNC_ID=20066;NEAREST=AHSA2;INTRON=23/25
rs777591	2:61417617	G	ENSG00000115464	ENST00000436269	Transcript	intron_variant	-	-	-	-	-	-	IMPACT=MODIFIER;STRAND=-1;FLAGS=cds_start_NF;SYMBOL=USP34;SYMBOL_SOURCE=HGNC;HGNC_ID=20066;NEAREST=AHSA2;INTRON=4/6
rs777591	2:61417617	G	ENSG00000115464	ENST00000463046	Transcript	intron_variant,non_coding_transcript_variant	-	-	-	-	-	-	IMPACT=MODIFIER;STRAND=-1;SYMBOL=USP34;SYMBOL_SOURCE=HGNC;HGNC_ID=20066;NEAREST=AHSA2;INTRON=27/27
rs777591	2:61417617	G	ENSG00000173209	ENST00000471542	Transcript	downstream_gene_variant	-	-	-	-	-	-	IMPACT=MODIFIER;DISTANCE=3570;STRAND=1;SYMBOL=AHSA2;SYMBOL_SOURCE=HGNC;HGNC_ID=20437;NEAREST=AHSA2
rs777591	2:61417617	G	ENSG00000173209	ENST00000484217	Transcript	downstream_gene_variant	-	-	-	-	-	-	IMPACT=MODIFIER;DISTANCE=3675;STRAND=1;SYMBOL=AHSA2;SYMBOL_SOURCE=HGNC;HGNC_ID=20437;NEAREST=AHSA2
rs777591	2:61417617	G	ENSG00000173209	ENST00000487904	Transcript	downstream_gene_variant	-	-	-	-	-	-	IMPACT=MODIFIER;DISTANCE=4736;STRAND=1;SYMBOL=AHSA2;SYMBOL_SOURCE=HGNC;HGNC_ID=20437;NEAREST=AHSA2
rs777591	2:61417617	G	ENSG00000173209	ENST00000489653	Transcript	downstream_gene_variant	-	-	-	-	-	-	IMPACT=MODIFIER;DISTANCE=3569;STRAND=1;SYMBOL=AHSA2;SYMBOL_SOURCE=HGNC;HGNC_ID=20437;NEAREST=AHSA2
rs777591	2:61417617	G	ENSG00000115464	ENST00000490552	Transcript	intron_variant,non_coding_transcript_variant	-	-	-	-	-	-	IMPACT=MODIFIER;STRAND=-1;SYMBOL=USP34;SYMBOL_SOURCE=HGNC;HGNC_ID=20066;NEAREST=AHSA2;INTRON=1/1
rs777591	2:61417617	G	ENSG00000173209	ENST00000491217	Transcript	downstream_gene_variant	-	-	-	-	-	-	IMPACT=MODIFIER;DISTANCE=3707;STRAND=1;SYMBOL=AHSA2;SYMBOL_SOURCE=HGNC;HGNC_ID=20437;NEAREST=AHSA2
rs777591	2:61417617	G	ENSG00000115464	ENST00000492604	Transcript	upstream_gene_variant	-	-	-	-	-	-	IMPACT=MODIFIER;DISTANCE=686;STRAND=-1;SYMBOL=USP34;SYMBOL_SOURCE=HGNC;HGNC_ID=20066;NEAREST=AHSA2
rs777591	2:61417617	G	ENSG00000173209	ENST00000493628	Transcript	downstream_gene_variant	-	-	-	-	-	-	IMPACT=MODIFIER;DISTANCE=3675;STRAND=1;SYMBOL=AHSA2;SYMBOL_SOURCE=HGNC;HGNC_ID=20437;NEAREST=AHSA2
rs777591	2:61417617	G	ENSG00000115464	ENST00000498268	Transcript	downstream_gene_variant	-	-	-	-	-	-	IMPACT=MODIFIER;DISTANCE=145;STRAND=-1;SYMBOL=USP34;SYMBOL_SOURCE=HGNC;HGNC_ID=20066;NEAREST=AHSA2
rs777593	2:61419103	A	ENSG00000173209	ENST00000357022	Transcript	downstream_gene_variant	-	-	-	-	-	-	IMPACT=MODIFIER;DISTANCE=4417;STRAND=1;SYMBOL=AHSA2;SYMBOL_SOURCE=HGNC;HGNC_ID=20437;NEAREST=AHSA2
rs777593	2:61419103	A	ENSG00000173209	ENST00000394457	Transcript	downstream_gene_variant	-	-	-	-	-	-	IMPACT=MODIFIER;DISTANCE=765;STRAND=1;SYMBOL=AHSA2;SYMBOL_SOURCE=HGNC;HGNC_ID=20437;NEAREST=AHSA2
rs777593	2:61419103	A	ENSG00000115464	ENST00000398571	Transcript	intron_variant	-	-	-	-	-	-	IMPACT=MODIFIER;STRAND=-1;SYMBOL=USP34;SYMBOL_SOURCE=HGNC;HGNC_ID=20066;NEAREST=AHSA2;INTRON=76/79
rs777593	2:61419103	A	ENSG00000115464	ENST00000411912	Transcript	intron_variant	-	-	-	-	-	-	IMPACT=MODIFIER;STRAND=-1;FLAGS=cds_start_NF;SYMBOL=USP34;SYMBOL_SOURCE=HGNC;HGNC_ID=20066;NEAREST=AHSA2;INTRON=22/25
rs777593	2:61419103	A	ENSG00000115464	ENST00000436269	Transcript	intron_variant	-	-	-	-	-	-	IMPACT=MODIFIER;STRAND=-1;FLAGS=cds_start_NF;SYMBOL=USP34;SYMBOL_SOURCE=HGNC;HGNC_ID=20066;NEAREST=AHSA2;INTRON=3/6
rs777593	2:61419103	A	ENSG00000115464	ENST00000463046	Transcript	intron_variant,non_coding_transcript_variant	-	-	-	-	-	-	IMPACT=MODIFIER;STRAND=-1;SYMBOL=USP34;SYMBOL_SOURCE=HGNC;HGNC_ID=20066;NEAREST=AHSA2;INTRON=26/27
rs777593	2:61419103	A	ENSG00000115464	ENST00000490552	Transcript	upstream_gene_variant	-	-	-	-	-	-	IMPACT=MODIFIER;DISTANCE=619;STRAND=-1;SYMBOL=USP34;SYMBOL_SOURCE=HGNC;HGNC_ID=20066;NEAREST=AHSA2
rs777593	2:61419103	A	ENSG00000115464	ENST00000492604	Transcript	upstream_gene_variant	-	-	-	-	-	-	IMPACT=MODIFIER;DISTANCE=2172;STRAND=-1;SYMBOL=USP34;SYMBOL_SOURCE=HGNC;HGNC_ID=20066;NEAREST=AHSA2
rs777593	2:61419103	A	ENSG00000115464	ENST00000498268	Transcript	intron_variant,non_coding_transcript_variant	-	-	-	-	-	-	IMPACT=MODIFIER;STRAND=-1;SYMBOL=USP34;SYMBOL_SOURCE=HGNC;HGNC_ID=20066;NEAREST=AHSA2;INTRON=1/1
rs777589	2:61425621	C	ENSG00000115464	ENST00000398571	Transcript	intron_variant	-	-	-	-	-	-	IMPACT=MODIFIER;STRAND=-1;SYMBOL=USP34;SYMBOL_SOURCE=HGNC;HGNC_ID=20066;NEAREST=USP34;INTRON=75/79
rs777589	2:61425621	C	ENSG00000115464	ENST00000411912	Transcript	intron_variant	-	-	-	-	-	-	IMPACT=MODIFIER;STRAND=-1;FLAGS=cds_start_NF;SYMBOL=USP34;SYMBOL_SOURCE=HGNC;HGNC_ID=20066;NEAREST=USP34;INTRON=21/25
rs777589	2:61425621	C	ENSG00000115464	ENST00000436269	Transcript	intron_variant	-	-	-	-	-	-	IMPACT=MODIFIER;STRAND=-1;FLAGS=cds_start_NF;SYMBOL=USP34;SYMBOL_SOURCE=HGNC;HGNC_ID=20066;NEAREST=USP34;INTRON=2/6
rs777589	2:61425621	C	ENSG00000115464	ENST00000463046	Transcript	intron_variant,non_coding_transcript_variant	-	-	-	-	-	-	IMPACT=MODIFIER;STRAND=-1;SYMBOL=USP34;SYMBOL_SOURCE=HGNC;HGNC_ID=20066;NEAREST=USP34;INTRON=25/27
rs777589	2:61425621	C	ENSG00000273302	ENST00000609422	Transcript	upstream_gene_variant	-	-	-	-	-	-	IMPACT=MODIFIER;DISTANCE=1493;STRAND=1;SYMBOL=RP11-493E12.2;SYMBOL_SOURCE=Clone_based_vega_gene;NEAREST=USP34
rs4672423	2:61435275	T	ENSG00000115464	ENST00000398571	Transcript	intron_variant	-	-	-	-	-	-	IMPACT=MODIFIER;STRAND=-1;SYMBOL=USP34;SYMBOL_SOURCE=HGNC;HGNC_ID=20066;NEAREST=USP34;INTRON=70/79
rs4672423	2:61435275	T	ENSG00000115464	ENST00000411912	Transcript	intron_variant	-	-	-	-	-	-	IMPACT=MODIFIER;STRAND=-1;FLAGS=cds_start_NF;SYMBOL=USP34;SYMBOL_SOURCE=HGNC;HGNC_ID=20066;NEAREST=USP34;INTRON=18/25
rs4672423	2:61435275	T	ENSG00000115464	ENST00000436269	Transcript	upstream_gene_variant	-	-	-	-	-	-	IMPACT=MODIFIER;DISTANCE=3810;STRAND=-1;FLAGS=cds_start_NF;SYMBOL=USP34;SYMBOL_SOURCE=HGNC;HGNC_ID=20066;NEAREST=USP34
rs4672423	2:61435275	T	ENSG00000115464	ENST00000463046	Transcript	non_coding_transcript_exon_variant	3106	-	-	-	-	-	IMPACT=MODIFIER;STRAND=-1;SYMBOL=USP34;SYMBOL_SOURCE=HGNC;HGNC_ID=20066;NEAREST=USP34;EXON=21/28
rs4672423	2:61435275	T	ENSG00000115464	ENST00000467128	Transcript	intron_variant,non_coding_transcript_variant	-	-	-	-	-	-	IMPACT=MODIFIER;STRAND=-1;SYMBOL=USP34;SYMBOL_SOURCE=HGNC;HGNC_ID=20066;NEAREST=USP34;INTRON=4/4
rs4672423	2:61435275	T	ENSG00000115464	ENST00000472689	Transcript	downstream_gene_variant	-	-	-	-	-	-	IMPACT=MODIFIER;DISTANCE=759;STRAND=-1;SYMBOL=USP34;SYMBOL_SOURCE=HGNC;HGNC_ID=20066;NEAREST=USP34
rs4672423	2:61435275	T	ENSG00000115464	ENST00000476716	Transcript	intron_variant,non_coding_transcript_variant	-	-	-	-	-	-	IMPACT=MODIFIER;STRAND=-1;SYMBOL=USP34;SYMBOL_SOURCE=HGNC;HGNC_ID=20066;NEAREST=USP34;INTRON=3/5
rs6709441	2:61436930	T	ENSG00000115464	ENST00000398571	Transcript	intron_variant	-	-	-	-	-	-	IMPACT=MODIFIER;STRAND=-1;SYMBOL=USP34;SYMBOL_SOURCE=HGNC;HGNC_ID=20066;NEAREST=USP34;INTRON=69/79
rs6709441	2:61436930	T	ENSG00000115464	ENST00000411912	Transcript	intron_variant	-	-	-	-	-	-	IMPACT=MODIFIER;STRAND=-1;FLAGS=cds_start_NF;SYMBOL=USP34;SYMBOL_SOURCE=HGNC;HGNC_ID=20066;NEAREST=USP34;INTRON=17/25
rs6709441	2:61436930	T	ENSG00000115464	ENST00000463046	Transcript	intron_variant,non_coding_transcript_variant	-	-	-	-	-	-	IMPACT=MODIFIER;STRAND=-1;SYMBOL=USP34;SYMBOL_SOURCE=HGNC;HGNC_ID=20066;NEAREST=USP34;INTRON=20/27
rs6709441	2:61436930	T	ENSG00000115464	ENST00000467128	Transcript	intron_variant,non_coding_transcript_variant	-	-	-	-	-	-	IMPACT=MODIFIER;STRAND=-1;SYMBOL=USP34;SYMBOL_SOURCE=HGNC;HGNC_ID=20066;NEAREST=USP34;INTRON=3/4
rs6709441	2:61436930	T	ENSG00000115464	ENST00000472689	Transcript	intron_variant,non_coding_transcript_variant	-	-	-	-	-	-	IMPACT=MODIFIER;STRAND=-1;SYMBOL=USP34;SYMBOL_SOURCE=HGNC;HGNC_ID=20066;NEAREST=USP34;INTRON=5/5
rs6709441	2:61436930	T	ENSG00000115464	ENST00000472706	Transcript	downstream_gene_variant	-	-	-	-	-	-	IMPACT=MODIFIER;DISTANCE=4805;STRAND=-1;SYMBOL=USP34;SYMBOL_SOURCE=HGNC;HGNC_ID=20066;NEAREST=USP34
rs6709441	2:61436930	T	ENSG00000115464	ENST00000476716	Transcript	intron_variant,non_coding_transcript_variant	-	-	-	-	-	-	IMPACT=MODIFIER;STRAND=-1;SYMBOL=USP34;SYMBOL_SOURCE=HGNC;HGNC_ID=20066;NEAREST=USP34;INTRON=2/5
rs6709441	2:61436930	T	ENSG00000115464	ENST00000490527	Transcript	downstream_gene_variant	-	-	-	-	-	-	IMPACT=MODIFIER;DISTANCE=4832;STRAND=-1;SYMBOL=USP34;SYMBOL_SOURCE=HGNC;HGNC_ID=20066;NEAREST=USP34
rs6545845	2:61437044	C	ENSG00000115464	ENST00000398571	Transcript	intron_variant	-	-	-	-	-	-	IMPACT=MODIFIER;STRAND=-1;SYMBOL=USP34;SYMBOL_SOURCE=HGNC;HGNC_ID=20066;NEAREST=USP34;INTRON=69/79
rs6545845	2:61437044	C	ENSG00000115464	ENST00000411912	Transcript	intron_variant	-	-	-	-	-	-	IMPACT=MODIFIER;STRAND=-1;FLAGS=cds_start_NF;SYMBOL=USP34;SYMBOL_SOURCE=HGNC;HGNC_ID=20066;NEAREST=USP34;INTRON=17/25
rs6545845	2:61437044	C	ENSG00000115464	ENST00000463046	Transcript	intron_variant,non_coding_transcript_variant	-	-	-	-	-	-	IMPACT=MODIFIER;STRAND=-1;SYMBOL=USP34;SYMBOL_SOURCE=HGNC;HGNC_ID=20066;NEAREST=USP34;INTRON=20/27
rs6545845	2:61437044	C	ENSG00000115464	ENST00000467128	Transcript	intron_variant,non_coding_transcript_variant	-	-	-	-	-	-	IMPACT=MODIFIER;STRAND=-1;SYMBOL=USP34;SYMBOL_SOURCE=HGNC;HGNC_ID=20066;NEAREST=USP34;INTRON=3/4
rs6545845	2:61437044	C	ENSG00000115464	ENST00000472689	Transcript	intron_variant,non_coding_transcript_variant	-	-	-	-	-	-	IMPACT=MODIFIER;STRAND=-1;SYMBOL=USP34;SYMBOL_SOURCE=HGNC;HGNC_ID=20066;NEAREST=USP34;INTRON=5/5
rs6545845	2:61437044	C	ENSG00000115464	ENST00000472706	Transcript	downstream_gene_variant	-	-	-	-	-	-	IMPACT=MODIFIER;DISTANCE=4691;STRAND=-1;SYMBOL=USP34;SYMBOL_SOURCE=HGNC;HGNC_ID=20066;NEAREST=USP34
rs6545845	2:61437044	C	ENSG00000115464	ENST00000476716	Transcript	intron_variant,non_coding_transcript_variant	-	-	-	-	-	-	IMPACT=MODIFIER;STRAND=-1;SYMBOL=USP34;SYMBOL_SOURCE=HGNC;HGNC_ID=20066;NEAREST=USP34;INTRON=2/5
rs6545845	2:61437044	C	ENSG00000115464	ENST00000490527	Transcript	downstream_gene_variant	-	-	-	-	-	-	IMPACT=MODIFIER;DISTANCE=4718;STRAND=-1;SYMBOL=USP34;SYMBOL_SOURCE=HGNC;HGNC_ID=20066;NEAREST=USP34
rs12615783	2:61440947	C	ENSG00000115464	ENST00000398571	Transcript	intron_variant	-	-	-	-	-	-	IMPACT=MODIFIER;STRAND=-1;SYMBOL=USP34;SYMBOL_SOURCE=HGNC;HGNC_ID=20066;NEAREST=USP34;INTRON=68/79
rs12615783	2:61440947	C	ENSG00000115464	ENST00000411912	Transcript	intron_variant	-	-	-	-	-	-	IMPACT=MODIFIER;STRAND=-1;FLAGS=cds_start_NF;SYMBOL=USP34;SYMBOL_SOURCE=HGNC;HGNC_ID=20066;NEAREST=USP34;INTRON=16/25
rs12615783	2:61440947	C	ENSG00000115464	ENST00000463046	Transcript	intron_variant,non_coding_transcript_variant	-	-	-	-	-	-	IMPACT=MODIFIER;STRAND=-1;SYMBOL=USP34;SYMBOL_SOURCE=HGNC;HGNC_ID=20066;NEAREST=USP34;INTRON=19/27
rs12615783	2:61440947	C	ENSG00000115464	ENST00000467128	Transcript	intron_variant,non_coding_transcript_variant	-	-	-	-	-	-	IMPACT=MODIFIER;STRAND=-1;SYMBOL=USP34;SYMBOL_SOURCE=HGNC;HGNC_ID=20066;NEAREST=USP34;INTRON=2/4
rs12615783	2:61440947	C	ENSG00000115464	ENST00000472689	Transcript	intron_variant,non_coding_transcript_variant	-	-	-	-	-	-	IMPACT=MODIFIER;STRAND=-1;SYMBOL=USP34;SYMBOL_SOURCE=HGNC;HGNC_ID=20066;NEAREST=USP34;INTRON=4/5
rs12615783	2:61440947	C	ENSG00000115464	ENST00000472706	Transcript	downstream_gene_variant	-	-	-	-	-	-	IMPACT=MODIFIER;DISTANCE=788;STRAND=-1;SYMBOL=USP34;SYMBOL_SOURCE=HGNC;HGNC_ID=20066;NEAREST=USP34
rs12615783	2:61440947	C	ENSG00000115464	ENST00000476716	Transcript	intron_variant,non_coding_transcript_variant	-	-	-	-	-	-	IMPACT=MODIFIER;STRAND=-1;SYMBOL=USP34;SYMBOL_SOURCE=HGNC;HGNC_ID=20066;NEAREST=USP34;INTRON=1/5
rs12615783	2:61440947	C	ENSG00000115464	ENST00000490527	Transcript	downstream_gene_variant	-	-	-	-	-	-	IMPACT=MODIFIER;DISTANCE=815;STRAND=-1;SYMBOL=USP34;SYMBOL_SOURCE=HGNC;HGNC_ID=20066;NEAREST=USP34
rs4672425	2:61444998	C	ENSG00000115464	ENST00000398571	Transcript	intron_variant	-	-	-	-	-	-	IMPACT=MODIFIER;STRAND=-1;SYMBOL=USP34;SYMBOL_SOURCE=HGNC;HGNC_ID=20066;NEAREST=USP34;INTRON=67/79
rs4672425	2:61444998	C	ENSG00000115464	ENST00000411912	Transcript	intron_variant	-	-	-	-	-	-	IMPACT=MODIFIER;STRAND=-1;FLAGS=cds_start_NF;SYMBOL=USP34;SYMBOL_SOURCE=HGNC;HGNC_ID=20066;NEAREST=USP34;INTRON=15/25
rs4672425	2:61444998	C	ENSG00000115464	ENST00000463046	Transcript	intron_variant,non_coding_transcript_variant	-	-	-	-	-	-	IMPACT=MODIFIER;STRAND=-1;SYMBOL=USP34;SYMBOL_SOURCE=HGNC;HGNC_ID=20066;NEAREST=USP34;INTRON=19/27
rs4672425	2:61444998	C	ENSG00000115464	ENST00000467128	Transcript	upstream_gene_variant	-	-	-	-	-	-	IMPACT=MODIFIER;DISTANCE=3200;STRAND=-1;SYMBOL=USP34;SYMBOL_SOURCE=HGNC;HGNC_ID=20066;NEAREST=USP34
rs4672425	2:61444998	C	ENSG00000115464	ENST00000468703	Transcript	downstream_gene_variant	-	-	-	-	-	-	IMPACT=MODIFIER;DISTANCE=4769;STRAND=-1;SYMBOL=USP34;SYMBOL_SOURCE=HGNC;HGNC_ID=20066;NEAREST=USP34
rs4672425	2:61444998	C	ENSG00000115464	ENST00000472689	Transcript	intron_variant,non_coding_transcript_variant	-	-	-	-	-	-	IMPACT=MODIFIER;STRAND=-1;SYMBOL=USP34;SYMBOL_SOURCE=HGNC;HGNC_ID=20066;NEAREST=USP34;INTRON=3/5
rs4672425	2:61444998	C	ENSG00000115464	ENST00000472706	Transcript	intron_variant,non_coding_transcript_variant	-	-	-	-	-	-	IMPACT=MODIFIER;STRAND=-1;SYMBOL=USP34;SYMBOL_SOURCE=HGNC;HGNC_ID=20066;NEAREST=USP34;INTRON=4/4
rs4672425	2:61444998	C	ENSG00000115464	ENST00000476716	Transcript	intron_variant,non_coding_transcript_variant	-	-	-	-	-	-	IMPACT=MODIFIER;STRAND=-1;SYMBOL=USP34;SYMBOL_SOURCE=HGNC;HGNC_ID=20066;NEAREST=USP34;INTRON=1/5
rs4672425	2:61444998	C	ENSG00000115464	ENST00000482250	Transcript	downstream_gene_variant	-	-	-	-	-	-	IMPACT=MODIFIER;DISTANCE=2542;STRAND=-1;SYMBOL=USP34;SYMBOL_SOURCE=HGNC;HGNC_ID=20066;NEAREST=USP34
rs4672425	2:61444998	C	ENSG00000115464	ENST00000483672	Transcript	downstream_gene_variant	-	-	-	-	-	-	IMPACT=MODIFIER;DISTANCE=2330;STRAND=-1;SYMBOL=USP34;SYMBOL_SOURCE=HGNC;HGNC_ID=20066;NEAREST=USP34
rs4672425	2:61444998	C	ENSG00000115464	ENST00000487547	Transcript	downstream_gene_variant	-	-	-	-	-	-	IMPACT=MODIFIER;DISTANCE=3696;STRAND=-1;SYMBOL=USP34;SYMBOL_SOURCE=HGNC;HGNC_ID=20066;NEAREST=USP34
rs4672425	2:61444998	C	ENSG00000115464	ENST00000490527	Transcript	intron_variant,non_coding_transcript_variant	-	-	-	-	-	-	IMPACT=MODIFIER;STRAND=-1;SYMBOL=USP34;SYMBOL_SOURCE=HGNC;HGNC_ID=20066;NEAREST=USP34;INTRON=2/2
rs6739427	2:61452879	C	ENSG00000115464	ENST00000398571	Transcript	intron_variant	-	-	-	-	-	-	IMPACT=MODIFIER;STRAND=-1;SYMBOL=USP34;SYMBOL_SOURCE=HGNC;HGNC_ID=20066;NEAREST=USP34;INTRON=62/79
rs6739427	2:61452879	C	ENSG00000115464	ENST00000411912	Transcript	intron_variant	-	-	-	-	-	-	IMPACT=MODIFIER;STRAND=-1;FLAGS=cds_start_NF;SYMBOL=USP34;SYMBOL_SOURCE=HGNC;HGNC_ID=20066;NEAREST=USP34;INTRON=10/25
rs6739427	2:61452879	C	ENSG00000115464	ENST00000453734	Transcript	downstream_gene_variant	-	-	-	-	-	-	IMPACT=MODIFIER;DISTANCE=1044;STRAND=-1;FLAGS=cds_start_NF;SYMBOL=USP34;SYMBOL_SOURCE=HGNC;HGNC_ID=20066;NEAREST=USP34
rs6739427	2:61452879	C	ENSG00000115464	ENST00000463046	Transcript	intron_variant,non_coding_transcript_variant	-	-	-	-	-	-	IMPACT=MODIFIER;STRAND=-1;SYMBOL=USP34;SYMBOL_SOURCE=HGNC;HGNC_ID=20066;NEAREST=USP34;INTRON=14/27
rs6739427	2:61452879	C	ENSG00000115464	ENST00000468703	Transcript	upstream_gene_variant	-	-	-	-	-	-	IMPACT=MODIFIER;DISTANCE=2489;STRAND=-1;SYMBOL=USP34;SYMBOL_SOURCE=HGNC;HGNC_ID=20066;NEAREST=USP34
rs6739427	2:61452879	C	ENSG00000115464	ENST00000472689	Transcript	upstream_gene_variant	-	-	-	-	-	-	IMPACT=MODIFIER;DISTANCE=3059;STRAND=-1;SYMBOL=USP34;SYMBOL_SOURCE=HGNC;HGNC_ID=20066;NEAREST=USP34
rs6739427	2:61452879	C	ENSG00000115464	ENST00000472706	Transcript	intron_variant,non_coding_transcript_variant	-	-	-	-	-	-	IMPACT=MODIFIER;STRAND=-1;SYMBOL=USP34;SYMBOL_SOURCE=HGNC;HGNC_ID=20066;NEAREST=USP34;INTRON=2/4
rs6739427	2:61452879	C	ENSG00000115464	ENST00000482250	Transcript	upstream_gene_variant	-	-	-	-	-	-	IMPACT=MODIFIER;DISTANCE=2769;STRAND=-1;SYMBOL=USP34;SYMBOL_SOURCE=HGNC;HGNC_ID=20066;NEAREST=USP34
rs6739427	2:61452879	C	ENSG00000115464	ENST00000483672	Transcript	upstream_gene_variant	-	-	-	-	-	-	IMPACT=MODIFIER;DISTANCE=4143;STRAND=-1;SYMBOL=USP34;SYMBOL_SOURCE=HGNC;HGNC_ID=20066;NEAREST=USP34
rs6739427	2:61452879	C	ENSG00000115464	ENST00000487547	Transcript	upstream_gene_variant	-	-	-	-	-	-	IMPACT=MODIFIER;DISTANCE=2083;STRAND=-1;SYMBOL=USP34;SYMBOL_SOURCE=HGNC;HGNC_ID=20066;NEAREST=USP34
rs6739427	2:61452879	C	ENSG00000115464	ENST00000490527	Transcript	upstream_gene_variant	-	-	-	-	-	-	IMPACT=MODIFIER;DISTANCE=3899;STRAND=-1;SYMBOL=USP34;SYMBOL_SOURCE=HGNC;HGNC_ID=20066;NEAREST=USP34
rs4672426	2:61457148	A	ENSG00000115464	ENST00000398571	Transcript	intron_variant	-	-	-	-	-	-	IMPACT=MODIFIER;STRAND=-1;SYMBOL=USP34;SYMBOL_SOURCE=HGNC;HGNC_ID=20066;NEAREST=USP34;INTRON=58/79
rs4672426	2:61457148	A	ENSG00000115464	ENST00000411912	Transcript	intron_variant	-	-	-	-	-	-	IMPACT=MODIFIER;STRAND=-1;FLAGS=cds_start_NF;SYMBOL=USP34;SYMBOL_SOURCE=HGNC;HGNC_ID=20066;NEAREST=USP34;INTRON=6/25
rs4672426	2:61457148	A	ENSG00000115464	ENST00000453734	Transcript	intron_variant	-	-	-	-	-	-	IMPACT=MODIFIER;STRAND=-1;FLAGS=cds_start_NF;SYMBOL=USP34;SYMBOL_SOURCE=HGNC;HGNC_ID=20066;NEAREST=USP34;INTRON=20/23
rs4672426	2:61457148	A	ENSG00000115464	ENST00000463046	Transcript	intron_variant,non_coding_transcript_variant	-	-	-	-	-	-	IMPACT=MODIFIER;STRAND=-1;SYMBOL=USP34;SYMBOL_SOURCE=HGNC;HGNC_ID=20066;NEAREST=USP34;INTRON=10/27
rs4672426	2:61457148	A	ENSG00000115464	ENST00000472706	Transcript	intron_variant,non_coding_transcript_variant	-	-	-	-	-	-	IMPACT=MODIFIER;STRAND=-1;SYMBOL=USP34;SYMBOL_SOURCE=HGNC;HGNC_ID=20066;NEAREST=USP34;INTRON=2/4
rs4672426	2:61457148	A	-	ENSR00000117649	RegulatoryFeature	regulatory_region_variant	-	-	-	-	-	-	IMPACT=MODIFIER;NEAREST=USP34;BIOTYPE=open_chromatin_region
rs7602859	2:61458206	T	ENSG00000115464	ENST00000398571	Transcript	intron_variant	-	-	-	-	-	-	IMPACT=MODIFIER;STRAND=-1;SYMBOL=USP34;SYMBOL_SOURCE=HGNC;HGNC_ID=20066;NEAREST=USP34;INTRON=58/79
rs7602859	2:61458206	T	ENSG00000115464	ENST00000411912	Transcript	intron_variant	-	-	-	-	-	-	IMPACT=MODIFIER;STRAND=-1;FLAGS=cds_start_NF;SYMBOL=USP34;SYMBOL_SOURCE=HGNC;HGNC_ID=20066;NEAREST=USP34;INTRON=6/25
rs7602859	2:61458206	T	ENSG00000115464	ENST00000453734	Transcript	intron_variant	-	-	-	-	-	-	IMPACT=MODIFIER;STRAND=-1;FLAGS=cds_start_NF;SYMBOL=USP34;SYMBOL_SOURCE=HGNC;HGNC_ID=20066;NEAREST=USP34;INTRON=20/23
rs7602859	2:61458206	T	ENSG00000115464	ENST00000463046	Transcript	intron_variant,non_coding_transcript_variant	-	-	-	-	-	-	IMPACT=MODIFIER;STRAND=-1;SYMBOL=USP34;SYMBOL_SOURCE=HGNC;HGNC_ID=20066;NEAREST=USP34;INTRON=10/27
rs7602859	2:61458206	T	ENSG00000115464	ENST00000472706	Transcript	intron_variant,non_coding_transcript_variant	-	-	-	-	-	-	IMPACT=MODIFIER;STRAND=-1;SYMBOL=USP34;SYMBOL_SOURCE=HGNC;HGNC_ID=20066;NEAREST=USP34;INTRON=2/4
rs4671399	2:61458518	T	ENSG00000115464	ENST00000398571	Transcript	intron_variant	-	-	-	-	-	-	IMPACT=MODIFIER;STRAND=-1;SYMBOL=USP34;SYMBOL_SOURCE=HGNC;HGNC_ID=20066;NEAREST=USP34;INTRON=58/79
rs4671399	2:61458518	T	ENSG00000115464	ENST00000411912	Transcript	intron_variant	-	-	-	-	-	-	IMPACT=MODIFIER;STRAND=-1;FLAGS=cds_start_NF;SYMBOL=USP34;SYMBOL_SOURCE=HGNC;HGNC_ID=20066;NEAREST=USP34;INTRON=6/25
rs4671399	2:61458518	T	ENSG00000115464	ENST00000453734	Transcript	intron_variant	-	-	-	-	-	-	IMPACT=MODIFIER;STRAND=-1;FLAGS=cds_start_NF;SYMBOL=USP34;SYMBOL_SOURCE=HGNC;HGNC_ID=20066;NEAREST=USP34;INTRON=20/23
rs4671399	2:61458518	T	ENSG00000115464	ENST00000463046	Transcript	intron_variant,non_coding_transcript_variant	-	-	-	-	-	-	IMPACT=MODIFIER;STRAND=-1;SYMBOL=USP34;SYMBOL_SOURCE=HGNC;HGNC_ID=20066;NEAREST=USP34;INTRON=10/27
rs4671399	2:61458518	T	ENSG00000115464	ENST00000472706	Transcript	intron_variant,non_coding_transcript_variant	-	-	-	-	-	-	IMPACT=MODIFIER;STRAND=-1;SYMBOL=USP34;SYMBOL_SOURCE=HGNC;HGNC_ID=20066;NEAREST=USP34;INTRON=2/4
rs6545848	2:61461183	T	ENSG00000115464	ENST00000398571	Transcript	intron_variant	-	-	-	-	-	-	IMPACT=MODIFIER;STRAND=-1;SYMBOL=USP34;SYMBOL_SOURCE=HGNC;HGNC_ID=20066;NEAREST=USP34;INTRON=57/79
rs6545848	2:61461183	T	ENSG00000115464	ENST00000411912	Transcript	intron_variant	-	-	-	-	-	-	IMPACT=MODIFIER;STRAND=-1;FLAGS=cds_start_NF;SYMBOL=USP34;SYMBOL_SOURCE=HGNC;HGNC_ID=20066;NEAREST=USP34;INTRON=5/25
rs6545848	2:61461183	T	ENSG00000115464	ENST00000453734	Transcript	intron_variant	-	-	-	-	-	-	IMPACT=MODIFIER;STRAND=-1;FLAGS=cds_start_NF;SYMBOL=USP34;SYMBOL_SOURCE=HGNC;HGNC_ID=20066;NEAREST=USP34;INTRON=19/23
rs6545848	2:61461183	T	ENSG00000115464	ENST00000463046	Transcript	intron_variant,non_coding_transcript_variant	-	-	-	-	-	-	IMPACT=MODIFIER;STRAND=-1;SYMBOL=USP34;SYMBOL_SOURCE=HGNC;HGNC_ID=20066;NEAREST=USP34;INTRON=9/27
rs6545848	2:61461183	T	ENSG00000115464	ENST00000472706	Transcript	intron_variant,non_coding_transcript_variant	-	-	-	-	-	-	IMPACT=MODIFIER;STRAND=-1;SYMBOL=USP34;SYMBOL_SOURCE=HGNC;HGNC_ID=20066;NEAREST=USP34;INTRON=2/4
rs13004855	2:61505072	T	ENSG00000115464	ENST00000398571	Transcript	intron_variant	-	-	-	-	-	-	IMPACT=MODIFIER;STRAND=-1;SYMBOL=USP34;SYMBOL_SOURCE=HGNC;HGNC_ID=20066;NEAREST=USP34;INTRON=41/79
rs13004855	2:61505072	T	ENSG00000115464	ENST00000453734	Transcript	intron_variant	-	-	-	-	-	-	IMPACT=MODIFIER;STRAND=-1;FLAGS=cds_start_NF;SYMBOL=USP34;SYMBOL_SOURCE=HGNC;HGNC_ID=20066;NEAREST=USP34;INTRON=3/23
rs13004855	2:61505072	T	ENSG00000115464	ENST00000472706	Transcript	intron_variant,non_coding_transcript_variant	-	-	-	-	-	-	IMPACT=MODIFIER;STRAND=-1;SYMBOL=USP34;SYMBOL_SOURCE=HGNC;HGNC_ID=20066;NEAREST=USP34;INTRON=2/4
rs13004855	2:61505072	T	ENSG00000115464	ENST00000484179	Transcript	intron_variant,non_coding_transcript_variant	-	-	-	-	-	-	IMPACT=MODIFIER;STRAND=-1;SYMBOL=USP34;SYMBOL_SOURCE=HGNC;HGNC_ID=20066;NEAREST=USP34;INTRON=4/4
rs13004855	2:61505072	T	ENSG00000115464	ENST00000494867	Transcript	non_coding_transcript_exon_variant	560	-	-	-	-	-	IMPACT=MODIFIER;STRAND=-1;SYMBOL=USP34;SYMBOL_SOURCE=HGNC;HGNC_ID=20066;NEAREST=USP34;EXON=4/4
rs6749226	2:61509783	A	ENSG00000115464	ENST00000398571	Transcript	intron_variant	-	-	-	-	-	-	IMPACT=MODIFIER;STRAND=-1;SYMBOL=USP34;SYMBOL_SOURCE=HGNC;HGNC_ID=20066;NEAREST=USP34;INTRON=37/79
rs6749226	2:61509783	A	ENSG00000115464	ENST00000453734	Transcript	upstream_gene_variant	-	-	-	-	-	-	IMPACT=MODIFIER;DISTANCE=2315;STRAND=-1;FLAGS=cds_start_NF;SYMBOL=USP34;SYMBOL_SOURCE=HGNC;HGNC_ID=20066;NEAREST=USP34
rs6749226	2:61509783	A	ENSG00000115464	ENST00000472706	Transcript	intron_variant,non_coding_transcript_variant	-	-	-	-	-	-	IMPACT=MODIFIER;STRAND=-1;SYMBOL=USP34;SYMBOL_SOURCE=HGNC;HGNC_ID=20066;NEAREST=USP34;INTRON=2/4
rs6749226	2:61509783	A	ENSG00000115464	ENST00000484179	Transcript	upstream_gene_variant	-	-	-	-	-	-	IMPACT=MODIFIER;DISTANCE=1497;STRAND=-1;SYMBOL=USP34;SYMBOL_SOURCE=HGNC;HGNC_ID=20066;NEAREST=USP34
rs6749226	2:61509783	A	ENSG00000115464	ENST00000494867	Transcript	upstream_gene_variant	-	-	-	-	-	-	IMPACT=MODIFIER;DISTANCE=1509;STRAND=-1;SYMBOL=USP34;SYMBOL_SOURCE=HGNC;HGNC_ID=20066;NEAREST=USP34
rs12620105	2:61512321	T	ENSG00000115464	ENST00000398571	Transcript	intron_variant	-	-	-	-	-	-	IMPACT=MODIFIER;STRAND=-1;SYMBOL=USP34;SYMBOL_SOURCE=HGNC;HGNC_ID=20066;NEAREST=USP34;INTRON=34/79
rs12620105	2:61512321	T	ENSG00000115464	ENST00000453734	Transcript	upstream_gene_variant	-	-	-	-	-	-	IMPACT=MODIFIER;DISTANCE=4853;STRAND=-1;FLAGS=cds_start_NF;SYMBOL=USP34;SYMBOL_SOURCE=HGNC;HGNC_ID=20066;NEAREST=USP34
rs12620105	2:61512321	T	ENSG00000115464	ENST00000472706	Transcript	intron_variant,non_coding_transcript_variant	-	-	-	-	-	-	IMPACT=MODIFIER;STRAND=-1;SYMBOL=USP34;SYMBOL_SOURCE=HGNC;HGNC_ID=20066;NEAREST=USP34;INTRON=2/4
rs12620105	2:61512321	T	ENSG00000115464	ENST00000484179	Transcript	upstream_gene_variant	-	-	-	-	-	-	IMPACT=MODIFIER;DISTANCE=4035;STRAND=-1;SYMBOL=USP34;SYMBOL_SOURCE=HGNC;HGNC_ID=20066;NEAREST=USP34
rs12620105	2:61512321	T	ENSG00000115464	ENST00000494867	Transcript	upstream_gene_variant	-	-	-	-	-	-	IMPACT=MODIFIER;DISTANCE=4047;STRAND=-1;SYMBOL=USP34;SYMBOL_SOURCE=HGNC;HGNC_ID=20066;NEAREST=USP34
rs10496092	2:61524679	T	ENSG00000115464	ENST00000398571	Transcript	intron_variant	-	-	-	-	-	-	IMPACT=MODIFIER;STRAND=-1;SYMBOL=USP34;SYMBOL_SOURCE=HGNC;HGNC_ID=20066;NEAREST=USP34;INTRON=29/79
rs10496092	2:61524679	T	ENSG00000115464	ENST00000472706	Transcript	intron_variant,non_coding_transcript_variant	-	-	-	-	-	-	IMPACT=MODIFIER;STRAND=-1;SYMBOL=USP34;SYMBOL_SOURCE=HGNC;HGNC_ID=20066;NEAREST=USP34;INTRON=1/4
rs2600663	2:61540687	G	ENSG00000115464	ENST00000398571	Transcript	intron_variant	-	-	-	-	-	-	IMPACT=MODIFIER;STRAND=-1;SYMBOL=USP34;SYMBOL_SOURCE=HGNC;HGNC_ID=20066;NEAREST=USP34;INTRON=25/79
rs1838978	2:61540923	C	ENSG00000115464	ENST00000398571	Transcript	intron_variant	-	-	-	-	-	-	IMPACT=MODIFIER;STRAND=-1;SYMBOL=USP34;SYMBOL_SOURCE=HGNC;HGNC_ID=20066;NEAREST=USP34;INTRON=25/79
rs2600661	2:61543081	C	ENSG00000115464	ENST00000398571	Transcript	intron_variant	-	-	-	-	-	-	IMPACT=MODIFIER;STRAND=-1;SYMBOL=USP34;SYMBOL_SOURCE=HGNC;HGNC_ID=20066;NEAREST=USP34;INTRON=23/79
rs2694634	2:61551435	C	ENSG00000115464	ENST00000398571	Transcript	intron_variant	-	-	-	-	-	-	IMPACT=MODIFIER;STRAND=-1;SYMBOL=USP34;SYMBOL_SOURCE=HGNC;HGNC_ID=20066;NEAREST=USP34;INTRON=21/79
rs7572603	2:61552145	G	ENSG00000115464	ENST00000398571	Transcript	intron_variant	-	-	-	-	-	-	IMPACT=MODIFIER;STRAND=-1;SYMBOL=USP34;SYMBOL_SOURCE=HGNC;HGNC_ID=20066;NEAREST=USP34;INTRON=21/79
rs778157	2:61554289	C	ENSG00000115464	ENST00000398571	Transcript	intron_variant	-	-	-	-	-	-	IMPACT=MODIFIER;STRAND=-1;SYMBOL=USP34;SYMBOL_SOURCE=HGNC;HGNC_ID=20066;NEAREST=USP34;INTRON=20/79
rs778158	2:61555421	G	ENSG00000115464	ENST00000398571	Transcript	intron_variant	-	-	-	-	-	-	IMPACT=MODIFIER;STRAND=-1;SYMBOL=USP34;SYMBOL_SOURCE=HGNC;HGNC_ID=20066;NEAREST=USP34;INTRON=20/79
rs2177961	2:61560264	C	ENSG00000115464	ENST00000398571	Transcript	intron_variant	-	-	-	-	-	-	IMPACT=MODIFIER;STRAND=-1;SYMBOL=USP34;SYMBOL_SOURCE=HGNC;HGNC_ID=20066;NEAREST=USP34;INTRON=19/79
rs12997538	2:61564249	C	ENSG00000115464	ENST00000398571	Transcript	intron_variant	-	-	-	-	-	-	IMPACT=MODIFIER;STRAND=-1;SYMBOL=USP34;SYMBOL_SOURCE=HGNC;HGNC_ID=20066;NEAREST=USP34;INTRON=18/79
rs12997538	2:61564249	C	ENSG00000115464	ENST00000460004	Transcript	downstream_gene_variant	-	-	-	-	-	-	IMPACT=MODIFIER;DISTANCE=2461;STRAND=-1;SYMBOL=USP34;SYMBOL_SOURCE=HGNC;HGNC_ID=20066;NEAREST=USP34
rs2463102	2:61571295	C	ENSG00000115464	ENST00000398571	Transcript	intron_variant	-	-	-	-	-	-	IMPACT=MODIFIER;STRAND=-1;SYMBOL=USP34;SYMBOL_SOURCE=HGNC;HGNC_ID=20066;NEAREST=USP34;INTRON=15/79
rs2463102	2:61571295	C	ENSG00000115464	ENST00000453133	Transcript	downstream_gene_variant	-	-	-	-	-	-	IMPACT=MODIFIER;DISTANCE=4112;STRAND=-1;FLAGS=cds_start_NF;SYMBOL=USP34;SYMBOL_SOURCE=HGNC;HGNC_ID=20066;NEAREST=USP34
rs2463102	2:61571295	C	ENSG00000115464	ENST00000460004	Transcript	intron_variant,non_coding_transcript_variant	-	-	-	-	-	-	IMPACT=MODIFIER;STRAND=-1;SYMBOL=USP34;SYMBOL_SOURCE=HGNC;HGNC_ID=20066;NEAREST=USP34;INTRON=2/3
rs2593633	2:61571513	C	ENSG00000115464	ENST00000398571	Transcript	intron_variant	-	-	-	-	-	-	IMPACT=MODIFIER;STRAND=-1;SYMBOL=USP34;SYMBOL_SOURCE=HGNC;HGNC_ID=20066;NEAREST=USP34;INTRON=15/79
rs2593633	2:61571513	C	ENSG00000115464	ENST00000453133	Transcript	downstream_gene_variant	-	-	-	-	-	-	IMPACT=MODIFIER;DISTANCE=3894;STRAND=-1;FLAGS=cds_start_NF;SYMBOL=USP34;SYMBOL_SOURCE=HGNC;HGNC_ID=20066;NEAREST=USP34
rs2593633	2:61571513	C	ENSG00000115464	ENST00000460004	Transcript	intron_variant,non_coding_transcript_variant	-	-	-	-	-	-	IMPACT=MODIFIER;STRAND=-1;SYMBOL=USP34;SYMBOL_SOURCE=HGNC;HGNC_ID=20066;NEAREST=USP34;INTRON=2/3
rs1465042	2:61572322	T	ENSG00000115464	ENST00000398571	Transcript	intron_variant	-	-	-	-	-	-	IMPACT=MODIFIER;STRAND=-1;SYMBOL=USP34;SYMBOL_SOURCE=HGNC;HGNC_ID=20066;NEAREST=USP34;INTRON=15/79
rs1465042	2:61572322	T	ENSG00000115464	ENST00000453133	Transcript	downstream_gene_variant	-	-	-	-	-	-	IMPACT=MODIFIER;DISTANCE=3085;STRAND=-1;FLAGS=cds_start_NF;SYMBOL=USP34;SYMBOL_SOURCE=HGNC;HGNC_ID=20066;NEAREST=USP34
rs1465042	2:61572322	T	ENSG00000115464	ENST00000460004	Transcript	intron_variant,non_coding_transcript_variant	-	-	-	-	-	-	IMPACT=MODIFIER;STRAND=-1;SYMBOL=USP34;SYMBOL_SOURCE=HGNC;HGNC_ID=20066;NEAREST=USP34;INTRON=2/3
rs778143	2:61581890	A	ENSG00000115464	ENST00000398571	Transcript	intron_variant	-	-	-	-	-	-	IMPACT=MODIFIER;STRAND=-1;SYMBOL=USP34;SYMBOL_SOURCE=HGNC;HGNC_ID=20066;NEAREST=USP34;INTRON=10/79
rs778143	2:61581890	A	ENSG00000115464	ENST00000453133	Transcript	intron_variant,NMD_transcript_variant	-	-	-	-	-	-	IMPACT=MODIFIER;STRAND=-1;FLAGS=cds_start_NF;SYMBOL=USP34;SYMBOL_SOURCE=HGNC;HGNC_ID=20066;NEAREST=USP34;INTRON=8/12
rs778144	2:61583128	C	ENSG00000115464	ENST00000398571	Transcript	intron_variant	-	-	-	-	-	-	IMPACT=MODIFIER;STRAND=-1;SYMBOL=USP34;SYMBOL_SOURCE=HGNC;HGNC_ID=20066;NEAREST=USP34;INTRON=10/79
rs778144	2:61583128	C	ENSG00000115464	ENST00000453133	Transcript	intron_variant,NMD_transcript_variant	-	-	-	-	-	-	IMPACT=MODIFIER;STRAND=-1;FLAGS=cds_start_NF;SYMBOL=USP34;SYMBOL_SOURCE=HGNC;HGNC_ID=20066;NEAREST=USP34;INTRON=8/12
rs9677047	2:61585295	G	ENSG00000115464	ENST00000398571	Transcript	intron_variant	-	-	-	-	-	-	IMPACT=MODIFIER;STRAND=-1;SYMBOL=USP34;SYMBOL_SOURCE=HGNC;HGNC_ID=20066;NEAREST=USP34;INTRON=10/79
rs9677047	2:61585295	G	ENSG00000115464	ENST00000453133	Transcript	intron_variant,NMD_transcript_variant	-	-	-	-	-	-	IMPACT=MODIFIER;STRAND=-1;FLAGS=cds_start_NF;SYMBOL=USP34;SYMBOL_SOURCE=HGNC;HGNC_ID=20066;NEAREST=USP34;INTRON=8/12
rs2177962	2:61588070	A	ENSG00000115464	ENST00000398571	Transcript	intron_variant	-	-	-	-	-	-	IMPACT=MODIFIER;STRAND=-1;SYMBOL=USP34;SYMBOL_SOURCE=HGNC;HGNC_ID=20066;NEAREST=USP34;INTRON=10/79
rs2177962	2:61588070	A	ENSG00000115464	ENST00000453133	Transcript	intron_variant,NMD_transcript_variant	-	-	-	-	-	-	IMPACT=MODIFIER;STRAND=-1;FLAGS=cds_start_NF;SYMBOL=USP34;SYMBOL_SOURCE=HGNC;HGNC_ID=20066;NEAREST=USP34;INTRON=8/12
rs2694651	2:61588642	C	ENSG00000115464	ENST00000398571	Transcript	intron_variant	-	-	-	-	-	-	IMPACT=MODIFIER;STRAND=-1;SYMBOL=USP34;SYMBOL_SOURCE=HGNC;HGNC_ID=20066;NEAREST=USP34;INTRON=10/79
rs2694651	2:61588642	C	ENSG00000115464	ENST00000453133	Transcript	intron_variant,NMD_transcript_variant	-	-	-	-	-	-	IMPACT=MODIFIER;STRAND=-1;FLAGS=cds_start_NF;SYMBOL=USP34;SYMBOL_SOURCE=HGNC;HGNC_ID=20066;NEAREST=USP34;INTRON=8/12
rs2694639	2:61595291	A	ENSG00000115464	ENST00000398571	Transcript	intron_variant	-	-	-	-	-	-	IMPACT=MODIFIER;STRAND=-1;SYMBOL=USP34;SYMBOL_SOURCE=HGNC;HGNC_ID=20066;NEAREST=USP34;INTRON=10/79
rs2694639	2:61595291	A	ENSG00000115464	ENST00000453133	Transcript	intron_variant,NMD_transcript_variant	-	-	-	-	-	-	IMPACT=MODIFIER;STRAND=-1;FLAGS=cds_start_NF;SYMBOL=USP34;SYMBOL_SOURCE=HGNC;HGNC_ID=20066;NEAREST=USP34;INTRON=8/12
rs2694642	2:61596180	G	ENSG00000115464	ENST00000398571	Transcript	intron_variant	-	-	-	-	-	-	IMPACT=MODIFIER;STRAND=-1;SYMBOL=USP34;SYMBOL_SOURCE=HGNC;HGNC_ID=20066;NEAREST=USP34;INTRON=10/79
rs2694642	2:61596180	G	ENSG00000115464	ENST00000453133	Transcript	intron_variant,NMD_transcript_variant	-	-	-	-	-	-	IMPACT=MODIFIER;STRAND=-1;FLAGS=cds_start_NF;SYMBOL=USP34;SYMBOL_SOURCE=HGNC;HGNC_ID=20066;NEAREST=USP34;INTRON=8/12
rs4672436	2:61603357	C	ENSG00000115464	ENST00000398571	Transcript	intron_variant	-	-	-	-	-	-	IMPACT=MODIFIER;STRAND=-1;SYMBOL=USP34;SYMBOL_SOURCE=HGNC;HGNC_ID=20066;NEAREST=USP34;INTRON=8/79
rs4672436	2:61603357	C	ENSG00000115464	ENST00000453133	Transcript	intron_variant,NMD_transcript_variant	-	-	-	-	-	-	IMPACT=MODIFIER;STRAND=-1;FLAGS=cds_start_NF;SYMBOL=USP34;SYMBOL_SOURCE=HGNC;HGNC_ID=20066;NEAREST=USP34;INTRON=6/12
rs2694643	2:61604383	A	ENSG00000115464	ENST00000398571	Transcript	intron_variant	-	-	-	-	-	-	IMPACT=MODIFIER;STRAND=-1;SYMBOL=USP34;SYMBOL_SOURCE=HGNC;HGNC_ID=20066;NEAREST=USP34;INTRON=8/79
rs2694643	2:61604383	A	ENSG00000115464	ENST00000453133	Transcript	intron_variant,NMD_transcript_variant	-	-	-	-	-	-	IMPACT=MODIFIER;STRAND=-1;FLAGS=cds_start_NF;SYMBOL=USP34;SYMBOL_SOURCE=HGNC;HGNC_ID=20066;NEAREST=USP34;INTRON=6/12
rs2694644	2:61604856	T	ENSG00000115464	ENST00000398571	Transcript	intron_variant	-	-	-	-	-	-	IMPACT=MODIFIER;STRAND=-1;SYMBOL=USP34;SYMBOL_SOURCE=HGNC;HGNC_ID=20066;NEAREST=USP34;INTRON=8/79
rs2694644	2:61604856	T	ENSG00000115464	ENST00000453133	Transcript	intron_variant,NMD_transcript_variant	-	-	-	-	-	-	IMPACT=MODIFIER;STRAND=-1;FLAGS=cds_start_NF;SYMBOL=USP34;SYMBOL_SOURCE=HGNC;HGNC_ID=20066;NEAREST=USP34;INTRON=6/12
rs778148	2:61606866	A	ENSG00000115464	ENST00000398571	Transcript	intron_variant	-	-	-	-	-	-	IMPACT=MODIFIER;STRAND=-1;SYMBOL=USP34;SYMBOL_SOURCE=HGNC;HGNC_ID=20066;NEAREST=USP34;INTRON=7/79
rs778148	2:61606866	A	ENSG00000115464	ENST00000453133	Transcript	intron_variant,NMD_transcript_variant	-	-	-	-	-	-	IMPACT=MODIFIER;STRAND=-1;FLAGS=cds_start_NF;SYMBOL=USP34;SYMBOL_SOURCE=HGNC;HGNC_ID=20066;NEAREST=USP34;INTRON=5/12
rs778152	2:61608540	A	ENSG00000115464	ENST00000398571	Transcript	intron_variant	-	-	-	-	-	-	IMPACT=MODIFIER;STRAND=-1;SYMBOL=USP34;SYMBOL_SOURCE=HGNC;HGNC_ID=20066;NEAREST=USP34;INTRON=6/79
rs778152	2:61608540	A	ENSG00000115464	ENST00000453133	Transcript	intron_variant,NMD_transcript_variant	-	-	-	-	-	-	IMPACT=MODIFIER;STRAND=-1;FLAGS=cds_start_NF;SYMBOL=USP34;SYMBOL_SOURCE=HGNC;HGNC_ID=20066;NEAREST=USP34;INTRON=4/12
rs2442031	2:61613785	G	ENSG00000115464	ENST00000398571	Transcript	intron_variant	-	-	-	-	-	-	IMPACT=MODIFIER;STRAND=-1;SYMBOL=USP34;SYMBOL_SOURCE=HGNC;HGNC_ID=20066;NEAREST=USP34;INTRON=5/79
rs2442031	2:61613785	G	ENSG00000115464	ENST00000453133	Transcript	intron_variant,NMD_transcript_variant	-	-	-	-	-	-	IMPACT=MODIFIER;STRAND=-1;FLAGS=cds_start_NF;SYMBOL=USP34;SYMBOL_SOURCE=HGNC;HGNC_ID=20066;NEAREST=USP34;INTRON=3/12
rs2442034	2:61615667	A	ENSG00000115464	ENST00000398571	Transcript	intron_variant	-	-	-	-	-	-	IMPACT=MODIFIER;STRAND=-1;SYMBOL=USP34;SYMBOL_SOURCE=HGNC;HGNC_ID=20066;NEAREST=USP34;INTRON=5/79
rs2442034	2:61615667	A	ENSG00000115464	ENST00000453133	Transcript	intron_variant,NMD_transcript_variant	-	-	-	-	-	-	IMPACT=MODIFIER;STRAND=-1;FLAGS=cds_start_NF;SYMBOL=USP34;SYMBOL_SOURCE=HGNC;HGNC_ID=20066;NEAREST=USP34;INTRON=3/12
rs2950268	2:61615763	T	ENSG00000115464	ENST00000398571	Transcript	intron_variant	-	-	-	-	-	-	IMPACT=MODIFIER;STRAND=-1;SYMBOL=USP34;SYMBOL_SOURCE=HGNC;HGNC_ID=20066;NEAREST=USP34;INTRON=5/79
rs2950268	2:61615763	T	ENSG00000115464	ENST00000453133	Transcript	intron_variant,NMD_transcript_variant	-	-	-	-	-	-	IMPACT=MODIFIER;STRAND=-1;FLAGS=cds_start_NF;SYMBOL=USP34;SYMBOL_SOURCE=HGNC;HGNC_ID=20066;NEAREST=USP34;INTRON=3/12
rs2694625	2:61616055	A	ENSG00000115464	ENST00000398571	Transcript	intron_variant	-	-	-	-	-	-	IMPACT=MODIFIER;STRAND=-1;SYMBOL=USP34;SYMBOL_SOURCE=HGNC;HGNC_ID=20066;NEAREST=USP34;INTRON=5/79
rs2694625	2:61616055	A	ENSG00000115464	ENST00000453133	Transcript	intron_variant,NMD_transcript_variant	-	-	-	-	-	-	IMPACT=MODIFIER;STRAND=-1;FLAGS=cds_start_NF;SYMBOL=USP34;SYMBOL_SOURCE=HGNC;HGNC_ID=20066;NEAREST=USP34;INTRON=3/12
rs2593627	2:61618574	C	ENSG00000115464	ENST00000398571	Transcript	intron_variant	-	-	-	-	-	-	IMPACT=MODIFIER;STRAND=-1;SYMBOL=USP34;SYMBOL_SOURCE=HGNC;HGNC_ID=20066;NEAREST=USP34;INTRON=5/79
rs2593627	2:61618574	C	ENSG00000115464	ENST00000453133	Transcript	intron_variant,NMD_transcript_variant	-	-	-	-	-	-	IMPACT=MODIFIER;STRAND=-1;FLAGS=cds_start_NF;SYMBOL=USP34;SYMBOL_SOURCE=HGNC;HGNC_ID=20066;NEAREST=USP34;INTRON=3/12
rs10190332	2:61619267	G	ENSG00000115464	ENST00000398571	Transcript	intron_variant	-	-	-	-	-	-	IMPACT=MODIFIER;STRAND=-1;SYMBOL=USP34;SYMBOL_SOURCE=HGNC;HGNC_ID=20066;NEAREST=USP34;INTRON=5/79
rs10190332	2:61619267	G	ENSG00000115464	ENST00000453133	Transcript	intron_variant,NMD_transcript_variant	-	-	-	-	-	-	IMPACT=MODIFIER;STRAND=-1;FLAGS=cds_start_NF;SYMBOL=USP34;SYMBOL_SOURCE=HGNC;HGNC_ID=20066;NEAREST=USP34;INTRON=3/12
rs7560978	2:61619588	A	ENSG00000115464	ENST00000398571	Transcript	intron_variant	-	-	-	-	-	-	IMPACT=MODIFIER;STRAND=-1;SYMBOL=USP34;SYMBOL_SOURCE=HGNC;HGNC_ID=20066;NEAREST=USP34;INTRON=5/79
rs7560978	2:61619588	A	ENSG00000115464	ENST00000453133	Transcript	intron_variant,NMD_transcript_variant	-	-	-	-	-	-	IMPACT=MODIFIER;STRAND=-1;FLAGS=cds_start_NF;SYMBOL=USP34;SYMBOL_SOURCE=HGNC;HGNC_ID=20066;NEAREST=USP34;INTRON=3/12
rs13023037	2:61620989	T	ENSG00000115464	ENST00000398571	Transcript	intron_variant	-	-	-	-	-	-	IMPACT=MODIFIER;STRAND=-1;SYMBOL=USP34;SYMBOL_SOURCE=HGNC;HGNC_ID=20066;NEAREST=USP34;INTRON=5/79
rs13023037	2:61620989	T	ENSG00000115464	ENST00000453133	Transcript	intron_variant,NMD_transcript_variant	-	-	-	-	-	-	IMPACT=MODIFIER;STRAND=-1;FLAGS=cds_start_NF;SYMBOL=USP34;SYMBOL_SOURCE=HGNC;HGNC_ID=20066;NEAREST=USP34;INTRON=3/12
rs778154	2:61646631	C	ENSG00000206937	ENST00000384210	Transcript	upstream_gene_variant	-	-	-	-	-	-	IMPACT=MODIFIER;DISTANCE=2118;STRAND=-1;SYMBOL=SNORA70B;SYMBOL_SOURCE=HGNC;HGNC_ID=33618;NEAREST=USP34
rs778154	2:61646631	C	ENSG00000115464	ENST00000398571	Transcript	intron_variant	-	-	-	-	-	-	IMPACT=MODIFIER;STRAND=-1;SYMBOL=USP34;SYMBOL_SOURCE=HGNC;HGNC_ID=20066;NEAREST=USP34;INTRON=2/79
rs778154	2:61646631	C	ENSG00000234624	ENST00000444364	Transcript	upstream_gene_variant	-	-	-	-	-	-	IMPACT=MODIFIER;DISTANCE=2299;STRAND=-1;SYMBOL=AC016894.1;SYMBOL_SOURCE=Clone_based_vega_gene;NEAREST=USP34
rs778154	2:61646631	C	ENSG00000115464	ENST00000453133	Transcript	intron_variant,NMD_transcript_variant	-	-	-	-	-	-	IMPACT=MODIFIER;STRAND=-1;FLAGS=cds_start_NF;SYMBOL=USP34;SYMBOL_SOURCE=HGNC;HGNC_ID=20066;NEAREST=USP34;INTRON=2/12
rs778155	2:61647901	G	ENSG00000206937	ENST00000384210	Transcript	upstream_gene_variant	-	-	-	-	-	-	IMPACT=MODIFIER;DISTANCE=3388;STRAND=-1;SYMBOL=SNORA70B;SYMBOL_SOURCE=HGNC;HGNC_ID=33618;NEAREST=USP34
rs778155	2:61647901	G	ENSG00000115464	ENST00000398571	Transcript	synonymous_variant	188	111	37	Y	taT/taC	-	IMPACT=LOW;STRAND=-1;SYMBOL=USP34;SYMBOL_SOURCE=HGNC;HGNC_ID=20066;NEAREST=USP34;EXON=2/80
rs778155	2:61647901	G	ENSG00000234624	ENST00000444364	Transcript	upstream_gene_variant	-	-	-	-	-	-	IMPACT=MODIFIER;DISTANCE=3569;STRAND=-1;SYMBOL=AC016894.1;SYMBOL_SOURCE=Clone_based_vega_gene;NEAREST=USP34
rs778155	2:61647901	G	ENSG00000115464	ENST00000453133	Transcript	synonymous_variant,NMD_transcript_variant	109	111	37	Y	taT/taC	-	IMPACT=LOW;STRAND=-1;FLAGS=cds_start_NF;SYMBOL=USP34;SYMBOL_SOURCE=HGNC;HGNC_ID=20066;NEAREST=USP34;EXON=2/13
rs1900572	2:61650715	G	ENSG00000115464	ENST00000398571	Transcript	intron_variant	-	-	-	-	-	-	IMPACT=MODIFIER;STRAND=-1;SYMBOL=USP34;SYMBOL_SOURCE=HGNC;HGNC_ID=20066;NEAREST=USP34;INTRON=1/79
rs1900572	2:61650715	G	ENSG00000115464	ENST00000453133	Transcript	intron_variant,NMD_transcript_variant	-	-	-	-	-	-	IMPACT=MODIFIER;STRAND=-1;FLAGS=cds_start_NF;SYMBOL=USP34;SYMBOL_SOURCE=HGNC;HGNC_ID=20066;NEAREST=USP34;INTRON=1/12
rs6545867	2:61651027	T	ENSG00000115464	ENST00000398571	Transcript	intron_variant	-	-	-	-	-	-	IMPACT=MODIFIER;STRAND=-1;SYMBOL=USP34;SYMBOL_SOURCE=HGNC;HGNC_ID=20066;NEAREST=USP34;INTRON=1/79
rs6545867	2:61651027	T	ENSG00000115464	ENST00000453133	Transcript	intron_variant,NMD_transcript_variant	-	-	-	-	-	-	IMPACT=MODIFIER;STRAND=-1;FLAGS=cds_start_NF;SYMBOL=USP34;SYMBOL_SOURCE=HGNC;HGNC_ID=20066;NEAREST=USP34;INTRON=1/12
rs2121660	2:61653058	C	ENSG00000115464	ENST00000398571	Transcript	intron_variant	-	-	-	-	-	-	IMPACT=MODIFIER;STRAND=-1;SYMBOL=USP34;SYMBOL_SOURCE=HGNC;HGNC_ID=20066;NEAREST=USP34;INTRON=1/79
rs2121660	2:61653058	C	ENSG00000115464	ENST00000453133	Transcript	intron_variant,NMD_transcript_variant	-	-	-	-	-	-	IMPACT=MODIFIER;STRAND=-1;FLAGS=cds_start_NF;SYMBOL=USP34;SYMBOL_SOURCE=HGNC;HGNC_ID=20066;NEAREST=USP34;INTRON=1/12
rs2121660	2:61653058	C	-	ENSR00000384674	RegulatoryFeature	regulatory_region_variant	-	-	-	-	-	-	IMPACT=MODIFIER;NEAREST=USP34;BIOTYPE=promoter_flanking_region
rs4672445	2:61655008	C	ENSG00000115464	ENST00000398571	Transcript	intron_variant	-	-	-	-	-	-	IMPACT=MODIFIER;STRAND=-1;SYMBOL=USP34;SYMBOL_SOURCE=HGNC;HGNC_ID=20066;NEAREST=USP34;INTRON=1/79
rs4672445	2:61655008	C	ENSG00000115464	ENST00000453133	Transcript	intron_variant,NMD_transcript_variant	-	-	-	-	-	-	IMPACT=MODIFIER;STRAND=-1;FLAGS=cds_start_NF;SYMBOL=USP34;SYMBOL_SOURCE=HGNC;HGNC_ID=20066;NEAREST=USP34;INTRON=1/12
rs2463100	2:61659199	C	ENSG00000115464	ENST00000398571	Transcript	intron_variant	-	-	-	-	-	-	IMPACT=MODIFIER;STRAND=-1;SYMBOL=USP34;SYMBOL_SOURCE=HGNC;HGNC_ID=20066;NEAREST=USP34;INTRON=1/79
rs2463100	2:61659199	C	ENSG00000115464	ENST00000453133	Transcript	intron_variant,NMD_transcript_variant	-	-	-	-	-	-	IMPACT=MODIFIER;STRAND=-1;FLAGS=cds_start_NF;SYMBOL=USP34;SYMBOL_SOURCE=HGNC;HGNC_ID=20066;NEAREST=USP34;INTRON=1/12
rs1186697	2:61661417	A	ENSG00000115464	ENST00000398571	Transcript	intron_variant	-	-	-	-	-	-	IMPACT=MODIFIER;STRAND=-1;SYMBOL=USP34;SYMBOL_SOURCE=HGNC;HGNC_ID=20066;NEAREST=USP34;INTRON=1/79
rs1186697	2:61661417	A	ENSG00000115464	ENST00000453133	Transcript	intron_variant,NMD_transcript_variant	-	-	-	-	-	-	IMPACT=MODIFIER;STRAND=-1;FLAGS=cds_start_NF;SYMBOL=USP34;SYMBOL_SOURCE=HGNC;HGNC_ID=20066;NEAREST=USP34;INTRON=1/12
rs1186697	2:61661417	A	-	ENSR00000117661	RegulatoryFeature	regulatory_region_variant	-	-	-	-	-	-	IMPACT=MODIFIER;NEAREST=USP34;BIOTYPE=enhancer
rs2593625	2:61668769	T	ENSG00000115464	ENST00000398571	Transcript	intron_variant	-	-	-	-	-	-	IMPACT=MODIFIER;STRAND=-1;SYMBOL=USP34;SYMBOL_SOURCE=HGNC;HGNC_ID=20066;NEAREST=USP34;INTRON=1/79
rs2593625	2:61668769	T	ENSG00000115464	ENST00000453133	Transcript	intron_variant,NMD_transcript_variant	-	-	-	-	-	-	IMPACT=MODIFIER;STRAND=-1;FLAGS=cds_start_NF;SYMBOL=USP34;SYMBOL_SOURCE=HGNC;HGNC_ID=20066;NEAREST=USP34;INTRON=1/12
rs2252662	2:61670731	C	ENSG00000115464	ENST00000398571	Transcript	intron_variant	-	-	-	-	-	-	IMPACT=MODIFIER;STRAND=-1;SYMBOL=USP34;SYMBOL_SOURCE=HGNC;HGNC_ID=20066;NEAREST=USP34;INTRON=1/79
rs2252662	2:61670731	C	ENSG00000115464	ENST00000453133	Transcript	intron_variant,NMD_transcript_variant	-	-	-	-	-	-	IMPACT=MODIFIER;STRAND=-1;FLAGS=cds_start_NF;SYMBOL=USP34;SYMBOL_SOURCE=HGNC;HGNC_ID=20066;NEAREST=USP34;INTRON=1/12
rs2264100	2:61670829	A	ENSG00000115464	ENST00000398571	Transcript	intron_variant	-	-	-	-	-	-	IMPACT=MODIFIER;STRAND=-1;SYMBOL=USP34;SYMBOL_SOURCE=HGNC;HGNC_ID=20066;NEAREST=USP34;INTRON=1/79
rs2264100	2:61670829	A	ENSG00000115464	ENST00000453133	Transcript	intron_variant,NMD_transcript_variant	-	-	-	-	-	-	IMPACT=MODIFIER;STRAND=-1;FLAGS=cds_start_NF;SYMBOL=USP34;SYMBOL_SOURCE=HGNC;HGNC_ID=20066;NEAREST=USP34;INTRON=1/12
rs2694635	2:61676940	T	ENSG00000115464	ENST00000398571	Transcript	intron_variant	-	-	-	-	-	-	IMPACT=MODIFIER;STRAND=-1;SYMBOL=USP34;SYMBOL_SOURCE=HGNC;HGNC_ID=20066;NEAREST=USP34;INTRON=1/79
rs2694635	2:61676940	T	ENSG00000115464	ENST00000453133	Transcript	intron_variant,NMD_transcript_variant	-	-	-	-	-	-	IMPACT=MODIFIER;STRAND=-1;FLAGS=cds_start_NF;SYMBOL=USP34;SYMBOL_SOURCE=HGNC;HGNC_ID=20066;NEAREST=USP34;INTRON=1/12
rs2694636	2:61677137	G	ENSG00000115464	ENST00000398571	Transcript	intron_variant	-	-	-	-	-	-	IMPACT=MODIFIER;STRAND=-1;SYMBOL=USP34;SYMBOL_SOURCE=HGNC;HGNC_ID=20066;NEAREST=USP34;INTRON=1/79
rs2694636	2:61677137	G	ENSG00000115464	ENST00000453133	Transcript	intron_variant,NMD_transcript_variant	-	-	-	-	-	-	IMPACT=MODIFIER;STRAND=-1;FLAGS=cds_start_NF;SYMBOL=USP34;SYMBOL_SOURCE=HGNC;HGNC_ID=20066;NEAREST=USP34;INTRON=1/12
rs2442029	2:61679552	T	ENSG00000115464	ENST00000398571	Transcript	intron_variant	-	-	-	-	-	-	IMPACT=MODIFIER;STRAND=-1;SYMBOL=USP34;SYMBOL_SOURCE=HGNC;HGNC_ID=20066;NEAREST=USP34;INTRON=1/79
rs2442029	2:61679552	T	ENSG00000115464	ENST00000453133	Transcript	intron_variant,NMD_transcript_variant	-	-	-	-	-	-	IMPACT=MODIFIER;STRAND=-1;FLAGS=cds_start_NF;SYMBOL=USP34;SYMBOL_SOURCE=HGNC;HGNC_ID=20066;NEAREST=USP34;INTRON=1/12
rs2256615	2:61679894	G	ENSG00000115464	ENST00000398571	Transcript	intron_variant	-	-	-	-	-	-	IMPACT=MODIFIER;STRAND=-1;SYMBOL=USP34;SYMBOL_SOURCE=HGNC;HGNC_ID=20066;NEAREST=USP34;INTRON=1/79
rs2256615	2:61679894	G	ENSG00000115464	ENST00000453133	Transcript	intron_variant,NMD_transcript_variant	-	-	-	-	-	-	IMPACT=MODIFIER;STRAND=-1;FLAGS=cds_start_NF;SYMBOL=USP34;SYMBOL_SOURCE=HGNC;HGNC_ID=20066;NEAREST=USP34;INTRON=1/12
rs2256617	2:61679924	G	ENSG00000115464	ENST00000398571	Transcript	intron_variant	-	-	-	-	-	-	IMPACT=MODIFIER;STRAND=-1;SYMBOL=USP34;SYMBOL_SOURCE=HGNC;HGNC_ID=20066;NEAREST=USP34;INTRON=1/79
rs2256617	2:61679924	G	ENSG00000115464	ENST00000453133	Transcript	intron_variant,NMD_transcript_variant	-	-	-	-	-	-	IMPACT=MODIFIER;STRAND=-1;FLAGS=cds_start_NF;SYMBOL=USP34;SYMBOL_SOURCE=HGNC;HGNC_ID=20066;NEAREST=USP34;INTRON=1/12
rs796597	2:61681060	G	ENSG00000115464	ENST00000398571	Transcript	intron_variant	-	-	-	-	-	-	IMPACT=MODIFIER;STRAND=-1;SYMBOL=USP34;SYMBOL_SOURCE=HGNC;HGNC_ID=20066;NEAREST=USP34;INTRON=1/79
rs796597	2:61681060	G	ENSG00000115464	ENST00000453133	Transcript	intron_variant,NMD_transcript_variant	-	-	-	-	-	-	IMPACT=MODIFIER;STRAND=-1;FLAGS=cds_start_NF;SYMBOL=USP34;SYMBOL_SOURCE=HGNC;HGNC_ID=20066;NEAREST=USP34;INTRON=1/12
rs778142	2:61681428	T	ENSG00000115464	ENST00000398571	Transcript	intron_variant	-	-	-	-	-	-	IMPACT=MODIFIER;STRAND=-1;SYMBOL=USP34;SYMBOL_SOURCE=HGNC;HGNC_ID=20066;NEAREST=USP34;INTRON=1/79
rs778142	2:61681428	T	ENSG00000115464	ENST00000453133	Transcript	intron_variant,NMD_transcript_variant	-	-	-	-	-	-	IMPACT=MODIFIER;STRAND=-1;FLAGS=cds_start_NF;SYMBOL=USP34;SYMBOL_SOURCE=HGNC;HGNC_ID=20066;NEAREST=USP34;INTRON=1/12
rs778141	2:61682178	G	ENSG00000115464	ENST00000398571	Transcript	intron_variant	-	-	-	-	-	-	IMPACT=MODIFIER;STRAND=-1;SYMBOL=USP34;SYMBOL_SOURCE=HGNC;HGNC_ID=20066;NEAREST=USP34;INTRON=1/79
rs778141	2:61682178	G	ENSG00000115464	ENST00000453133	Transcript	intron_variant,NMD_transcript_variant	-	-	-	-	-	-	IMPACT=MODIFIER;STRAND=-1;FLAGS=cds_start_NF;SYMBOL=USP34;SYMBOL_SOURCE=HGNC;HGNC_ID=20066;NEAREST=USP34;INTRON=1/12
rs778140	2:61682976	T	ENSG00000115464	ENST00000398571	Transcript	intron_variant	-	-	-	-	-	-	IMPACT=MODIFIER;STRAND=-1;SYMBOL=USP34;SYMBOL_SOURCE=HGNC;HGNC_ID=20066;NEAREST=USP34;INTRON=1/79
rs778140	2:61682976	T	ENSG00000115464	ENST00000453133	Transcript	intron_variant,NMD_transcript_variant	-	-	-	-	-	-	IMPACT=MODIFIER;STRAND=-1;FLAGS=cds_start_NF;SYMBOL=USP34;SYMBOL_SOURCE=HGNC;HGNC_ID=20066;NEAREST=USP34;INTRON=1/12
rs1186711	2:61688505	C	ENSG00000115464	ENST00000398571	Transcript	intron_variant	-	-	-	-	-	-	IMPACT=MODIFIER;STRAND=-1;SYMBOL=USP34;SYMBOL_SOURCE=HGNC;HGNC_ID=20066;NEAREST=USP34;INTRON=1/79
rs1186711	2:61688505	C	ENSG00000115464	ENST00000453133	Transcript	intron_variant,NMD_transcript_variant	-	-	-	-	-	-	IMPACT=MODIFIER;STRAND=-1;FLAGS=cds_start_NF;SYMBOL=USP34;SYMBOL_SOURCE=HGNC;HGNC_ID=20066;NEAREST=USP34;INTRON=1/12
rs1186710	2:61688727	A	ENSG00000115464	ENST00000398571	Transcript	intron_variant	-	-	-	-	-	-	IMPACT=MODIFIER;STRAND=-1;SYMBOL=USP34;SYMBOL_SOURCE=HGNC;HGNC_ID=20066;NEAREST=USP34;INTRON=1/79
rs1186710	2:61688727	A	ENSG00000115464	ENST00000453133	Transcript	intron_variant,NMD_transcript_variant	-	-	-	-	-	-	IMPACT=MODIFIER;STRAND=-1;FLAGS=cds_start_NF;SYMBOL=USP34;SYMBOL_SOURCE=HGNC;HGNC_ID=20066;NEAREST=USP34;INTRON=1/12
rs12713436	2:61691260	C	ENSG00000115464	ENST00000398571	Transcript	intron_variant	-	-	-	-	-	-	IMPACT=MODIFIER;STRAND=-1;SYMBOL=USP34;SYMBOL_SOURCE=HGNC;HGNC_ID=20066;NEAREST=USP34;INTRON=1/79
rs12713436	2:61691260	C	ENSG00000115464	ENST00000453133	Transcript	intron_variant,NMD_transcript_variant	-	-	-	-	-	-	IMPACT=MODIFIER;STRAND=-1;FLAGS=cds_start_NF;SYMBOL=USP34;SYMBOL_SOURCE=HGNC;HGNC_ID=20066;NEAREST=USP34;INTRON=1/12
rs12713436	2:61691260	C	-	ENSR00000384679	RegulatoryFeature	regulatory_region_variant	-	-	-	-	-	-	IMPACT=MODIFIER;NEAREST=USP34;BIOTYPE=promoter_flanking_region
rs13003376	2:61691440	C	ENSG00000115464	ENST00000398571	Transcript	intron_variant	-	-	-	-	-	-	IMPACT=MODIFIER;STRAND=-1;SYMBOL=USP34;SYMBOL_SOURCE=HGNC;HGNC_ID=20066;NEAREST=USP34;INTRON=1/79
rs13003376	2:61691440	C	ENSG00000115464	ENST00000453133	Transcript	intron_variant,NMD_transcript_variant	-	-	-	-	-	-	IMPACT=MODIFIER;STRAND=-1;FLAGS=cds_start_NF;SYMBOL=USP34;SYMBOL_SOURCE=HGNC;HGNC_ID=20066;NEAREST=USP34;INTRON=1/12
rs13003376	2:61691440	C	-	ENSR00000384679	RegulatoryFeature	regulatory_region_variant	-	-	-	-	-	-	IMPACT=MODIFIER;NEAREST=USP34;BIOTYPE=promoter_flanking_region
rs6545871	2:61692203	T	ENSG00000115464	ENST00000398571	Transcript	intron_variant	-	-	-	-	-	-	IMPACT=MODIFIER;STRAND=-1;SYMBOL=USP34;SYMBOL_SOURCE=HGNC;HGNC_ID=20066;NEAREST=USP34;INTRON=1/79
rs6545871	2:61692203	T	ENSG00000115464	ENST00000453133	Transcript	intron_variant,NMD_transcript_variant	-	-	-	-	-	-	IMPACT=MODIFIER;STRAND=-1;FLAGS=cds_start_NF;SYMBOL=USP34;SYMBOL_SOURCE=HGNC;HGNC_ID=20066;NEAREST=USP34;INTRON=1/12
rs1867839	2:61694797	T	ENSG00000115464	ENST00000398571	Transcript	intron_variant	-	-	-	-	-	-	IMPACT=MODIFIER;STRAND=-1;SYMBOL=USP34;SYMBOL_SOURCE=HGNC;HGNC_ID=20066;NEAREST=USP34;INTRON=1/79
rs1867839	2:61694797	T	ENSG00000115464	ENST00000453133	Transcript	intron_variant,NMD_transcript_variant	-	-	-	-	-	-	IMPACT=MODIFIER;STRAND=-1;FLAGS=cds_start_NF;SYMBOL=USP34;SYMBOL_SOURCE=HGNC;HGNC_ID=20066;NEAREST=USP34;INTRON=1/12
rs1867839	2:61694797	T	ENSG00000270820	ENST00000578974	Transcript	upstream_gene_variant	-	-	-	-	-	-	IMPACT=MODIFIER;DISTANCE=3793;STRAND=1;SYMBOL=RP11-355B11.2;SYMBOL_SOURCE=Clone_based_vega_gene;NEAREST=USP34
rs1867839	2:61694797	T	ENSG00000270820	ENST00000603028	Transcript	upstream_gene_variant	-	-	-	-	-	-	IMPACT=MODIFIER;DISTANCE=3694;STRAND=1;SYMBOL=RP11-355B11.2;SYMBOL_SOURCE=Clone_based_vega_gene;NEAREST=USP34
rs1867839	2:61694797	T	ENSG00000270820	ENST00000603199	Transcript	upstream_gene_variant	-	-	-	-	-	-	IMPACT=MODIFIER;DISTANCE=3718;STRAND=1;SYMBOL=RP11-355B11.2;SYMBOL_SOURCE=Clone_based_vega_gene;NEAREST=USP34
rs1867839	2:61694797	T	ENSG00000270820	ENST00000603652	Transcript	upstream_gene_variant	-	-	-	-	-	-	IMPACT=MODIFIER;DISTANCE=3526;STRAND=1;SYMBOL=RP11-355B11.2;SYMBOL_SOURCE=Clone_based_vega_gene;NEAREST=USP34
rs7588814	2:61695589	T	ENSG00000115464	ENST00000398571	Transcript	intron_variant	-	-	-	-	-	-	IMPACT=MODIFIER;STRAND=-1;SYMBOL=USP34;SYMBOL_SOURCE=HGNC;HGNC_ID=20066;NEAREST=USP34;INTRON=1/79
rs7588814	2:61695589	T	ENSG00000115464	ENST00000453133	Transcript	intron_variant,NMD_transcript_variant	-	-	-	-	-	-	IMPACT=MODIFIER;STRAND=-1;FLAGS=cds_start_NF;SYMBOL=USP34;SYMBOL_SOURCE=HGNC;HGNC_ID=20066;NEAREST=USP34;INTRON=1/12
rs7588814	2:61695589	T	ENSG00000270820	ENST00000578974	Transcript	upstream_gene_variant	-	-	-	-	-	-	IMPACT=MODIFIER;DISTANCE=3001;STRAND=1;SYMBOL=RP11-355B11.2;SYMBOL_SOURCE=Clone_based_vega_gene;NEAREST=USP34
rs7588814	2:61695589	T	ENSG00000270820	ENST00000603028	Transcript	upstream_gene_variant	-	-	-	-	-	-	IMPACT=MODIFIER;DISTANCE=2902;STRAND=1;SYMBOL=RP11-355B11.2;SYMBOL_SOURCE=Clone_based_vega_gene;NEAREST=USP34
rs7588814	2:61695589	T	ENSG00000270820	ENST00000603199	Transcript	upstream_gene_variant	-	-	-	-	-	-	IMPACT=MODIFIER;DISTANCE=2926;STRAND=1;SYMBOL=RP11-355B11.2;SYMBOL_SOURCE=Clone_based_vega_gene;NEAREST=USP34
rs7588814	2:61695589	T	ENSG00000270820	ENST00000603652	Transcript	upstream_gene_variant	-	-	-	-	-	-	IMPACT=MODIFIER;DISTANCE=2734;STRAND=1;SYMBOL=RP11-355B11.2;SYMBOL_SOURCE=Clone_based_vega_gene;NEAREST=USP34
rs1880866	2:61698972	C	ENSG00000115464	ENST00000398571	Transcript	upstream_gene_variant	-	-	-	-	-	-	IMPACT=MODIFIER;DISTANCE=1068;STRAND=-1;SYMBOL=USP34;SYMBOL_SOURCE=HGNC;HGNC_ID=20066;NEAREST=USP34
rs1880866	2:61698972	C	ENSG00000115464	ENST00000453133	Transcript	upstream_gene_variant	-	-	-	-	-	-	IMPACT=MODIFIER;DISTANCE=1147;STRAND=-1;FLAGS=cds_start_NF;SYMBOL=USP34;SYMBOL_SOURCE=HGNC;HGNC_ID=20066;NEAREST=USP34
rs1880866	2:61698972	C	ENSG00000270820	ENST00000578974	Transcript	intron_variant,non_coding_transcript_variant	-	-	-	-	-	-	IMPACT=MODIFIER;STRAND=1;SYMBOL=RP11-355B11.2;SYMBOL_SOURCE=Clone_based_vega_gene;NEAREST=USP34;INTRON=2/3
rs1880866	2:61698972	C	ENSG00000270820	ENST00000603028	Transcript	intron_variant,non_coding_transcript_variant	-	-	-	-	-	-	IMPACT=MODIFIER;STRAND=1;SYMBOL=RP11-355B11.2;SYMBOL_SOURCE=Clone_based_vega_gene;NEAREST=USP34;INTRON=2/2
rs1880866	2:61698972	C	ENSG00000270820	ENST00000603199	Transcript	intron_variant,non_coding_transcript_variant	-	-	-	-	-	-	IMPACT=MODIFIER;STRAND=1;SYMBOL=RP11-355B11.2;SYMBOL_SOURCE=Clone_based_vega_gene;NEAREST=USP34;INTRON=1/1
rs1880866	2:61698972	C	ENSG00000270820	ENST00000603652	Transcript	intron_variant,non_coding_transcript_variant	-	-	-	-	-	-	IMPACT=MODIFIER;STRAND=1;SYMBOL=RP11-355B11.2;SYMBOL_SOURCE=Clone_based_vega_gene;NEAREST=USP34;INTRON=1/2
rs1880866	2:61698972	C	-	ENSR00000117668	RegulatoryFeature	regulatory_region_variant	-	-	-	-	-	-	IMPACT=MODIFIER;NEAREST=USP34;BIOTYPE=promoter
rs11691734	2:61702466	T	ENSG00000115464	ENST00000398571	Transcript	upstream_gene_variant	-	-	-	-	-	-	IMPACT=MODIFIER;DISTANCE=4562;STRAND=-1;SYMBOL=USP34;SYMBOL_SOURCE=HGNC;HGNC_ID=20066;NEAREST=USP34
rs11691734	2:61702466	T	ENSG00000082898	ENST00000401558	Transcript	downstream_gene_variant	-	-	-	-	-	-	IMPACT=MODIFIER;DISTANCE=2518;STRAND=-1;SYMBOL=XPO1;SYMBOL_SOURCE=HGNC;HGNC_ID=12825;NEAREST=USP34
rs11691734	2:61702466	T	ENSG00000082898	ENST00000404992	Transcript	downstream_gene_variant	-	-	-	-	-	-	IMPACT=MODIFIER;DISTANCE=3007;STRAND=-1;SYMBOL=XPO1;SYMBOL_SOURCE=HGNC;HGNC_ID=12825;NEAREST=USP34
rs11691734	2:61702466	T	ENSG00000082898	ENST00000406957	Transcript	downstream_gene_variant	-	-	-	-	-	-	IMPACT=MODIFIER;DISTANCE=3369;STRAND=-1;SYMBOL=XPO1;SYMBOL_SOURCE=HGNC;HGNC_ID=12825;NEAREST=USP34
rs11691734	2:61702466	T	ENSG00000082898	ENST00000428210	Transcript	downstream_gene_variant	-	-	-	-	-	-	IMPACT=MODIFIER;DISTANCE=2603;STRAND=-1;SYMBOL=XPO1;SYMBOL_SOURCE=HGNC;HGNC_ID=12825;NEAREST=USP34
rs11691734	2:61702466	T	ENSG00000115464	ENST00000453133	Transcript	upstream_gene_variant	-	-	-	-	-	-	IMPACT=MODIFIER;DISTANCE=4641;STRAND=-1;FLAGS=cds_start_NF;SYMBOL=USP34;SYMBOL_SOURCE=HGNC;HGNC_ID=20066;NEAREST=USP34
rs11691734	2:61702466	T	ENSG00000082898	ENST00000481073	Transcript	downstream_gene_variant	-	-	-	-	-	-	IMPACT=MODIFIER;DISTANCE=2604;STRAND=-1;SYMBOL=XPO1;SYMBOL_SOURCE=HGNC;HGNC_ID=12825;NEAREST=USP34
rs11691734	2:61702466	T	ENSG00000270820	ENST00000578974	Transcript	intron_variant,non_coding_transcript_variant	-	-	-	-	-	-	IMPACT=MODIFIER;STRAND=1;SYMBOL=RP11-355B11.2;SYMBOL_SOURCE=Clone_based_vega_gene;NEAREST=USP34;INTRON=2/3
rs11691734	2:61702466	T	ENSG00000270820	ENST00000603028	Transcript	intron_variant,non_coding_transcript_variant	-	-	-	-	-	-	IMPACT=MODIFIER;STRAND=1;SYMBOL=RP11-355B11.2;SYMBOL_SOURCE=Clone_based_vega_gene;NEAREST=USP34;INTRON=2/2
rs11691734	2:61702466	T	ENSG00000270820	ENST00000603199	Transcript	intron_variant,non_coding_transcript_variant	-	-	-	-	-	-	IMPACT=MODIFIER;STRAND=1;SYMBOL=RP11-355B11.2;SYMBOL_SOURCE=Clone_based_vega_gene;NEAREST=USP34;INTRON=1/1
rs11691734	2:61702466	T	ENSG00000270820	ENST00000603652	Transcript	intron_variant,non_coding_transcript_variant	-	-	-	-	-	-	IMPACT=MODIFIER;STRAND=1;SYMBOL=RP11-355B11.2;SYMBOL_SOURCE=Clone_based_vega_gene;NEAREST=USP34;INTRON=1/2
rs4430924	2:61703856	G	ENSG00000082898	ENST00000401558	Transcript	downstream_gene_variant	-	-	-	-	-	-	IMPACT=MODIFIER;DISTANCE=1128;STRAND=-1;SYMBOL=XPO1;SYMBOL_SOURCE=HGNC;HGNC_ID=12825;NEAREST=USP34
rs4430924	2:61703856	G	ENSG00000082898	ENST00000404992	Transcript	downstream_gene_variant	-	-	-	-	-	-	IMPACT=MODIFIER;DISTANCE=1617;STRAND=-1;SYMBOL=XPO1;SYMBOL_SOURCE=HGNC;HGNC_ID=12825;NEAREST=USP34
rs4430924	2:61703856	G	ENSG00000082898	ENST00000406957	Transcript	downstream_gene_variant	-	-	-	-	-	-	IMPACT=MODIFIER;DISTANCE=1979;STRAND=-1;SYMBOL=XPO1;SYMBOL_SOURCE=HGNC;HGNC_ID=12825;NEAREST=USP34
rs4430924	2:61703856	G	ENSG00000082898	ENST00000428210	Transcript	downstream_gene_variant	-	-	-	-	-	-	IMPACT=MODIFIER;DISTANCE=1213;STRAND=-1;SYMBOL=XPO1;SYMBOL_SOURCE=HGNC;HGNC_ID=12825;NEAREST=USP34
rs4430924	2:61703856	G	ENSG00000082898	ENST00000481073	Transcript	downstream_gene_variant	-	-	-	-	-	-	IMPACT=MODIFIER;DISTANCE=1214;STRAND=-1;SYMBOL=XPO1;SYMBOL_SOURCE=HGNC;HGNC_ID=12825;NEAREST=USP34
rs4430924	2:61703856	G	ENSG00000270820	ENST00000578974	Transcript	intron_variant,non_coding_transcript_variant	-	-	-	-	-	-	IMPACT=MODIFIER;STRAND=1;SYMBOL=RP11-355B11.2;SYMBOL_SOURCE=Clone_based_vega_gene;NEAREST=USP34;INTRON=2/3
rs4430924	2:61703856	G	ENSG00000270820	ENST00000603028	Transcript	intron_variant,non_coding_transcript_variant	-	-	-	-	-	-	IMPACT=MODIFIER;STRAND=1;SYMBOL=RP11-355B11.2;SYMBOL_SOURCE=Clone_based_vega_gene;NEAREST=USP34;INTRON=2/2
rs4430924	2:61703856	G	ENSG00000270820	ENST00000603199	Transcript	intron_variant,non_coding_transcript_variant	-	-	-	-	-	-	IMPACT=MODIFIER;STRAND=1;SYMBOL=RP11-355B11.2;SYMBOL_SOURCE=Clone_based_vega_gene;NEAREST=USP34;INTRON=1/1
rs4430924	2:61703856	G	ENSG00000270820	ENST00000603652	Transcript	intron_variant,non_coding_transcript_variant	-	-	-	-	-	-	IMPACT=MODIFIER;STRAND=1;SYMBOL=RP11-355B11.2;SYMBOL_SOURCE=Clone_based_vega_gene;NEAREST=USP34;INTRON=1/2
rs9679557	2:61709349	A	ENSG00000082898	ENST00000401558	Transcript	intron_variant	-	-	-	-	-	-	IMPACT=MODIFIER;STRAND=-1;SYMBOL=XPO1;SYMBOL_SOURCE=HGNC;HGNC_ID=12825;NEAREST=USP34;INTRON=23/24
rs9679557	2:61709349	A	ENSG00000082898	ENST00000404992	Transcript	intron_variant	-	-	-	-	-	-	IMPACT=MODIFIER;STRAND=-1;SYMBOL=XPO1;SYMBOL_SOURCE=HGNC;HGNC_ID=12825;NEAREST=USP34;INTRON=23/24
rs9679557	2:61709349	A	ENSG00000082898	ENST00000406957	Transcript	intron_variant	-	-	-	-	-	-	IMPACT=MODIFIER;STRAND=-1;SYMBOL=XPO1;SYMBOL_SOURCE=HGNC;HGNC_ID=12825;NEAREST=USP34;INTRON=24/25
rs9679557	2:61709349	A	ENSG00000082898	ENST00000428210	Transcript	intron_variant,NMD_transcript_variant	-	-	-	-	-	-	IMPACT=MODIFIER;STRAND=-1;SYMBOL=XPO1;SYMBOL_SOURCE=HGNC;HGNC_ID=12825;NEAREST=USP34;INTRON=22/23
rs9679557	2:61709349	A	ENSG00000082898	ENST00000461407	Transcript	downstream_gene_variant	-	-	-	-	-	-	IMPACT=MODIFIER;DISTANCE=411;STRAND=-1;SYMBOL=XPO1;SYMBOL_SOURCE=HGNC;HGNC_ID=12825;NEAREST=USP34
rs9679557	2:61709349	A	ENSG00000082898	ENST00000481073	Transcript	intron_variant,non_coding_transcript_variant	-	-	-	-	-	-	IMPACT=MODIFIER;STRAND=-1;SYMBOL=XPO1;SYMBOL_SOURCE=HGNC;HGNC_ID=12825;NEAREST=USP34;INTRON=12/13
rs9679557	2:61709349	A	ENSG00000082898	ENST00000492182	Transcript	downstream_gene_variant	-	-	-	-	-	-	IMPACT=MODIFIER;DISTANCE=411;STRAND=-1;SYMBOL=XPO1;SYMBOL_SOURCE=HGNC;HGNC_ID=12825;NEAREST=USP34
rs9679557	2:61709349	A	ENSG00000082898	ENST00000494468	Transcript	downstream_gene_variant	-	-	-	-	-	-	IMPACT=MODIFIER;DISTANCE=3370;STRAND=-1;SYMBOL=XPO1;SYMBOL_SOURCE=HGNC;HGNC_ID=12825;NEAREST=USP34
rs9679557	2:61709349	A	ENSG00000270820	ENST00000578974	Transcript	intron_variant,non_coding_transcript_variant	-	-	-	-	-	-	IMPACT=MODIFIER;STRAND=1;SYMBOL=RP11-355B11.2;SYMBOL_SOURCE=Clone_based_vega_gene;NEAREST=USP34;INTRON=2/3
rs9679557	2:61709349	A	ENSG00000270820	ENST00000603028	Transcript	intron_variant,non_coding_transcript_variant	-	-	-	-	-	-	IMPACT=MODIFIER;STRAND=1;SYMBOL=RP11-355B11.2;SYMBOL_SOURCE=Clone_based_vega_gene;NEAREST=USP34;INTRON=2/2
rs9679557	2:61709349	A	ENSG00000270820	ENST00000603199	Transcript	downstream_gene_variant	-	-	-	-	-	-	IMPACT=MODIFIER;DISTANCE=1804;STRAND=1;SYMBOL=RP11-355B11.2;SYMBOL_SOURCE=Clone_based_vega_gene;NEAREST=USP34
rs9679557	2:61709349	A	ENSG00000270820	ENST00000603652	Transcript	intron_variant,non_coding_transcript_variant	-	-	-	-	-	-	IMPACT=MODIFIER;STRAND=1;SYMBOL=RP11-355B11.2;SYMBOL_SOURCE=Clone_based_vega_gene;NEAREST=USP34;INTRON=2/2
rs9679557	2:61709349	A	ENSG00000270820	ENST00000605437	Transcript	upstream_gene_variant	-	-	-	-	-	-	IMPACT=MODIFIER;DISTANCE=1159;STRAND=1;SYMBOL=RP11-355B11.2;SYMBOL_SOURCE=Clone_based_vega_gene;NEAREST=USP34
rs3821222	2:61713526	G	ENSG00000082898	ENST00000401558	Transcript	intron_variant	-	-	-	-	-	-	IMPACT=MODIFIER;STRAND=-1;SYMBOL=XPO1;SYMBOL_SOURCE=HGNC;HGNC_ID=12825;NEAREST=USP34;INTRON=19/24
rs3821222	2:61713526	G	ENSG00000082898	ENST00000404992	Transcript	intron_variant	-	-	-	-	-	-	IMPACT=MODIFIER;STRAND=-1;SYMBOL=XPO1;SYMBOL_SOURCE=HGNC;HGNC_ID=12825;NEAREST=USP34;INTRON=19/24
rs3821222	2:61713526	G	ENSG00000082898	ENST00000406957	Transcript	intron_variant	-	-	-	-	-	-	IMPACT=MODIFIER;STRAND=-1;SYMBOL=XPO1;SYMBOL_SOURCE=HGNC;HGNC_ID=12825;NEAREST=USP34;INTRON=20/25
rs3821222	2:61713526	G	ENSG00000082898	ENST00000428210	Transcript	intron_variant,NMD_transcript_variant	-	-	-	-	-	-	IMPACT=MODIFIER;STRAND=-1;SYMBOL=XPO1;SYMBOL_SOURCE=HGNC;HGNC_ID=12825;NEAREST=USP34;INTRON=18/23
rs3821222	2:61713526	G	ENSG00000082898	ENST00000461407	Transcript	intron_variant,non_coding_transcript_variant	-	-	-	-	-	-	IMPACT=MODIFIER;STRAND=-1;SYMBOL=XPO1;SYMBOL_SOURCE=HGNC;HGNC_ID=12825;NEAREST=USP34;INTRON=2/3
rs3821222	2:61713526	G	ENSG00000082898	ENST00000481073	Transcript	intron_variant,non_coding_transcript_variant	-	-	-	-	-	-	IMPACT=MODIFIER;STRAND=-1;SYMBOL=XPO1;SYMBOL_SOURCE=HGNC;HGNC_ID=12825;NEAREST=USP34;INTRON=8/13
rs3821222	2:61713526	G	ENSG00000082898	ENST00000492182	Transcript	upstream_gene_variant	-	-	-	-	-	-	IMPACT=MODIFIER;DISTANCE=433;STRAND=-1;SYMBOL=XPO1;SYMBOL_SOURCE=HGNC;HGNC_ID=12825;NEAREST=USP34
rs3821222	2:61713526	G	ENSG00000082898	ENST00000494468	Transcript	intron_variant,non_coding_transcript_variant	-	-	-	-	-	-	IMPACT=MODIFIER;STRAND=-1;SYMBOL=XPO1;SYMBOL_SOURCE=HGNC;HGNC_ID=12825;NEAREST=USP34;INTRON=2/2
rs3821222	2:61713526	G	ENSG00000270820	ENST00000578974	Transcript	downstream_gene_variant	-	-	-	-	-	-	IMPACT=MODIFIER;DISTANCE=2261;STRAND=1;SYMBOL=RP11-355B11.2;SYMBOL_SOURCE=Clone_based_vega_gene;NEAREST=USP34
rs3821222	2:61713526	G	ENSG00000270820	ENST00000603028	Transcript	downstream_gene_variant	-	-	-	-	-	-	IMPACT=MODIFIER;DISTANCE=3465;STRAND=1;SYMBOL=RP11-355B11.2;SYMBOL_SOURCE=Clone_based_vega_gene;NEAREST=USP34
rs3821222	2:61713526	G	ENSG00000270820	ENST00000603652	Transcript	downstream_gene_variant	-	-	-	-	-	-	IMPACT=MODIFIER;DISTANCE=3671;STRAND=1;SYMBOL=RP11-355B11.2;SYMBOL_SOURCE=Clone_based_vega_gene;NEAREST=USP34
rs3821222	2:61713526	G	ENSG00000270820	ENST00000605437	Transcript	downstream_gene_variant	-	-	-	-	-	-	IMPACT=MODIFIER;DISTANCE=2450;STRAND=1;SYMBOL=RP11-355B11.2;SYMBOL_SOURCE=Clone_based_vega_gene;NEAREST=USP34
rs6705235	2:61713580	C	ENSG00000082898	ENST00000401558	Transcript	intron_variant	-	-	-	-	-	-	IMPACT=MODIFIER;STRAND=-1;SYMBOL=XPO1;SYMBOL_SOURCE=HGNC;HGNC_ID=12825;NEAREST=USP34;INTRON=19/24
rs6705235	2:61713580	C	ENSG00000082898	ENST00000404992	Transcript	intron_variant	-	-	-	-	-	-	IMPACT=MODIFIER;STRAND=-1;SYMBOL=XPO1;SYMBOL_SOURCE=HGNC;HGNC_ID=12825;NEAREST=USP34;INTRON=19/24
rs6705235	2:61713580	C	ENSG00000082898	ENST00000406957	Transcript	intron_variant	-	-	-	-	-	-	IMPACT=MODIFIER;STRAND=-1;SYMBOL=XPO1;SYMBOL_SOURCE=HGNC;HGNC_ID=12825;NEAREST=USP34;INTRON=20/25
rs6705235	2:61713580	C	ENSG00000082898	ENST00000428210	Transcript	intron_variant,NMD_transcript_variant	-	-	-	-	-	-	IMPACT=MODIFIER;STRAND=-1;SYMBOL=XPO1;SYMBOL_SOURCE=HGNC;HGNC_ID=12825;NEAREST=USP34;INTRON=18/23
rs6705235	2:61713580	C	ENSG00000082898	ENST00000461407	Transcript	intron_variant,non_coding_transcript_variant	-	-	-	-	-	-	IMPACT=MODIFIER;STRAND=-1;SYMBOL=XPO1;SYMBOL_SOURCE=HGNC;HGNC_ID=12825;NEAREST=USP34;INTRON=2/3
rs6705235	2:61713580	C	ENSG00000082898	ENST00000481073	Transcript	intron_variant,non_coding_transcript_variant	-	-	-	-	-	-	IMPACT=MODIFIER;STRAND=-1;SYMBOL=XPO1;SYMBOL_SOURCE=HGNC;HGNC_ID=12825;NEAREST=USP34;INTRON=8/13
rs6705235	2:61713580	C	ENSG00000082898	ENST00000492182	Transcript	upstream_gene_variant	-	-	-	-	-	-	IMPACT=MODIFIER;DISTANCE=487;STRAND=-1;SYMBOL=XPO1;SYMBOL_SOURCE=HGNC;HGNC_ID=12825;NEAREST=USP34
rs6705235	2:61713580	C	ENSG00000082898	ENST00000494468	Transcript	intron_variant,non_coding_transcript_variant	-	-	-	-	-	-	IMPACT=MODIFIER;STRAND=-1;SYMBOL=XPO1;SYMBOL_SOURCE=HGNC;HGNC_ID=12825;NEAREST=USP34;INTRON=2/2
rs6705235	2:61713580	C	ENSG00000270820	ENST00000578974	Transcript	downstream_gene_variant	-	-	-	-	-	-	IMPACT=MODIFIER;DISTANCE=2315;STRAND=1;SYMBOL=RP11-355B11.2;SYMBOL_SOURCE=Clone_based_vega_gene;NEAREST=USP34
rs6705235	2:61713580	C	ENSG00000270820	ENST00000603028	Transcript	downstream_gene_variant	-	-	-	-	-	-	IMPACT=MODIFIER;DISTANCE=3519;STRAND=1;SYMBOL=RP11-355B11.2;SYMBOL_SOURCE=Clone_based_vega_gene;NEAREST=USP34
rs6705235	2:61713580	C	ENSG00000270820	ENST00000603652	Transcript	downstream_gene_variant	-	-	-	-	-	-	IMPACT=MODIFIER;DISTANCE=3725;STRAND=1;SYMBOL=RP11-355B11.2;SYMBOL_SOURCE=Clone_based_vega_gene;NEAREST=USP34
rs6705235	2:61713580	C	ENSG00000270820	ENST00000605437	Transcript	downstream_gene_variant	-	-	-	-	-	-	IMPACT=MODIFIER;DISTANCE=2504;STRAND=1;SYMBOL=RP11-355B11.2;SYMBOL_SOURCE=Clone_based_vega_gene;NEAREST=USP34
rs1971183	2:61716924	C	ENSG00000082898	ENST00000401558	Transcript	intron_variant	-	-	-	-	-	-	IMPACT=MODIFIER;STRAND=-1;SYMBOL=XPO1;SYMBOL_SOURCE=HGNC;HGNC_ID=12825;NEAREST=USP34;INTRON=17/24
rs1971183	2:61716924	C	ENSG00000082898	ENST00000404992	Transcript	intron_variant	-	-	-	-	-	-	IMPACT=MODIFIER;STRAND=-1;SYMBOL=XPO1;SYMBOL_SOURCE=HGNC;HGNC_ID=12825;NEAREST=USP34;INTRON=17/24
rs1971183	2:61716924	C	ENSG00000082898	ENST00000406957	Transcript	intron_variant	-	-	-	-	-	-	IMPACT=MODIFIER;STRAND=-1;SYMBOL=XPO1;SYMBOL_SOURCE=HGNC;HGNC_ID=12825;NEAREST=USP34;INTRON=18/25
rs1971183	2:61716924	C	ENSG00000082898	ENST00000428210	Transcript	intron_variant,NMD_transcript_variant	-	-	-	-	-	-	IMPACT=MODIFIER;STRAND=-1;SYMBOL=XPO1;SYMBOL_SOURCE=HGNC;HGNC_ID=12825;NEAREST=USP34;INTRON=16/23
rs1971183	2:61716924	C	ENSG00000082898	ENST00000460037	Transcript	downstream_gene_variant	-	-	-	-	-	-	IMPACT=MODIFIER;DISTANCE=3849;STRAND=-1;SYMBOL=XPO1;SYMBOL_SOURCE=HGNC;HGNC_ID=12825;NEAREST=USP34
rs1971183	2:61716924	C	ENSG00000082898	ENST00000461407	Transcript	upstream_gene_variant	-	-	-	-	-	-	IMPACT=MODIFIER;DISTANCE=1126;STRAND=-1;SYMBOL=XPO1;SYMBOL_SOURCE=HGNC;HGNC_ID=12825;NEAREST=USP34
rs1971183	2:61716924	C	ENSG00000082898	ENST00000469337	Transcript	downstream_gene_variant	-	-	-	-	-	-	IMPACT=MODIFIER;DISTANCE=2553;STRAND=-1;SYMBOL=XPO1;SYMBOL_SOURCE=HGNC;HGNC_ID=12825;NEAREST=USP34
rs1971183	2:61716924	C	ENSG00000082898	ENST00000481073	Transcript	intron_variant,non_coding_transcript_variant	-	-	-	-	-	-	IMPACT=MODIFIER;STRAND=-1;SYMBOL=XPO1;SYMBOL_SOURCE=HGNC;HGNC_ID=12825;NEAREST=USP34;INTRON=6/13
rs1971183	2:61716924	C	ENSG00000082898	ENST00000492182	Transcript	upstream_gene_variant	-	-	-	-	-	-	IMPACT=MODIFIER;DISTANCE=3831;STRAND=-1;SYMBOL=XPO1;SYMBOL_SOURCE=HGNC;HGNC_ID=12825;NEAREST=USP34
rs1971183	2:61716924	C	ENSG00000082898	ENST00000494468	Transcript	upstream_gene_variant	-	-	-	-	-	-	IMPACT=MODIFIER;DISTANCE=1126;STRAND=-1;SYMBOL=XPO1;SYMBOL_SOURCE=HGNC;HGNC_ID=12825;NEAREST=USP34
rs12473030	2:61720497	A	ENSG00000082898	ENST00000401558	Transcript	intron_variant	-	-	-	-	-	-	IMPACT=MODIFIER;STRAND=-1;SYMBOL=XPO1;SYMBOL_SOURCE=HGNC;HGNC_ID=12825;NEAREST=USP34;INTRON=12/24
rs12473030	2:61720497	A	ENSG00000082898	ENST00000404992	Transcript	intron_variant	-	-	-	-	-	-	IMPACT=MODIFIER;STRAND=-1;SYMBOL=XPO1;SYMBOL_SOURCE=HGNC;HGNC_ID=12825;NEAREST=USP34;INTRON=12/24
rs12473030	2:61720497	A	ENSG00000082898	ENST00000406957	Transcript	intron_variant	-	-	-	-	-	-	IMPACT=MODIFIER;STRAND=-1;SYMBOL=XPO1;SYMBOL_SOURCE=HGNC;HGNC_ID=12825;NEAREST=USP34;INTRON=13/25
rs12473030	2:61720497	A	ENSG00000082898	ENST00000428210	Transcript	3_prime_UTR_variant,NMD_transcript_variant	3445	-	-	-	-	-	IMPACT=MODIFIER;STRAND=-1;SYMBOL=XPO1;SYMBOL_SOURCE=HGNC;HGNC_ID=12825;NEAREST=USP34;EXON=13/24
rs12473030	2:61720497	A	ENSG00000082898	ENST00000437159	Transcript	downstream_gene_variant	-	-	-	-	-	-	IMPACT=MODIFIER;DISTANCE=3632;STRAND=-1;FLAGS=cds_start_NF;SYMBOL=XPO1;SYMBOL_SOURCE=HGNC;HGNC_ID=12825;NEAREST=USP34
rs12473030	2:61720497	A	ENSG00000082898	ENST00000460037	Transcript	downstream_gene_variant	-	-	-	-	-	-	IMPACT=MODIFIER;DISTANCE=276;STRAND=-1;SYMBOL=XPO1;SYMBOL_SOURCE=HGNC;HGNC_ID=12825;NEAREST=USP34
rs12473030	2:61720497	A	ENSG00000082898	ENST00000461407	Transcript	upstream_gene_variant	-	-	-	-	-	-	IMPACT=MODIFIER;DISTANCE=4699;STRAND=-1;SYMBOL=XPO1;SYMBOL_SOURCE=HGNC;HGNC_ID=12825;NEAREST=USP34
rs12473030	2:61720497	A	ENSG00000082898	ENST00000469337	Transcript	upstream_gene_variant	-	-	-	-	-	-	IMPACT=MODIFIER;DISTANCE=368;STRAND=-1;SYMBOL=XPO1;SYMBOL_SOURCE=HGNC;HGNC_ID=12825;NEAREST=USP34
rs12473030	2:61720497	A	ENSG00000082898	ENST00000475744	Transcript	downstream_gene_variant	-	-	-	-	-	-	IMPACT=MODIFIER;DISTANCE=3599;STRAND=-1;SYMBOL=XPO1;SYMBOL_SOURCE=HGNC;HGNC_ID=12825;NEAREST=USP34
rs12473030	2:61720497	A	ENSG00000082898	ENST00000481073	Transcript	intron_variant,non_coding_transcript_variant	-	-	-	-	-	-	IMPACT=MODIFIER;STRAND=-1;SYMBOL=XPO1;SYMBOL_SOURCE=HGNC;HGNC_ID=12825;NEAREST=USP34;INTRON=1/13
rs12473030	2:61720497	A	ENSG00000082898	ENST00000494468	Transcript	upstream_gene_variant	-	-	-	-	-	-	IMPACT=MODIFIER;DISTANCE=4699;STRAND=-1;SYMBOL=XPO1;SYMBOL_SOURCE=HGNC;HGNC_ID=12825;NEAREST=USP34
rs12713437	2:61722904	T	ENSG00000082898	ENST00000401558	Transcript	intron_variant	-	-	-	-	-	-	IMPACT=MODIFIER;STRAND=-1;SYMBOL=XPO1;SYMBOL_SOURCE=HGNC;HGNC_ID=12825;NEAREST=USP34;INTRON=10/24
rs12713437	2:61722904	T	ENSG00000082898	ENST00000404992	Transcript	intron_variant	-	-	-	-	-	-	IMPACT=MODIFIER;STRAND=-1;SYMBOL=XPO1;SYMBOL_SOURCE=HGNC;HGNC_ID=12825;NEAREST=USP34;INTRON=10/24
rs12713437	2:61722904	T	ENSG00000082898	ENST00000406957	Transcript	intron_variant	-	-	-	-	-	-	IMPACT=MODIFIER;STRAND=-1;SYMBOL=XPO1;SYMBOL_SOURCE=HGNC;HGNC_ID=12825;NEAREST=USP34;INTRON=11/25
rs12713437	2:61722904	T	ENSG00000082898	ENST00000428210	Transcript	intron_variant,NMD_transcript_variant	-	-	-	-	-	-	IMPACT=MODIFIER;STRAND=-1;SYMBOL=XPO1;SYMBOL_SOURCE=HGNC;HGNC_ID=12825;NEAREST=USP34;INTRON=11/23
rs12713437	2:61722904	T	ENSG00000082898	ENST00000437159	Transcript	downstream_gene_variant	-	-	-	-	-	-	IMPACT=MODIFIER;DISTANCE=1225;STRAND=-1;FLAGS=cds_start_NF;SYMBOL=XPO1;SYMBOL_SOURCE=HGNC;HGNC_ID=12825;NEAREST=USP34
rs12713437	2:61722904	T	ENSG00000082898	ENST00000451765	Transcript	downstream_gene_variant	-	-	-	-	-	-	IMPACT=MODIFIER;DISTANCE=3996;STRAND=-1;FLAGS=cds_end_NF;SYMBOL=XPO1;SYMBOL_SOURCE=HGNC;HGNC_ID=12825;NEAREST=USP34
rs12713437	2:61722904	T	ENSG00000082898	ENST00000460037	Transcript	upstream_gene_variant	-	-	-	-	-	-	IMPACT=MODIFIER;DISTANCE=196;STRAND=-1;SYMBOL=XPO1;SYMBOL_SOURCE=HGNC;HGNC_ID=12825;NEAREST=USP34
rs12713437	2:61722904	T	ENSG00000082898	ENST00000469337	Transcript	upstream_gene_variant	-	-	-	-	-	-	IMPACT=MODIFIER;DISTANCE=2775;STRAND=-1;SYMBOL=XPO1;SYMBOL_SOURCE=HGNC;HGNC_ID=12825;NEAREST=USP34
rs12713437	2:61722904	T	ENSG00000082898	ENST00000475744	Transcript	downstream_gene_variant	-	-	-	-	-	-	IMPACT=MODIFIER;DISTANCE=1192;STRAND=-1;SYMBOL=XPO1;SYMBOL_SOURCE=HGNC;HGNC_ID=12825;NEAREST=USP34
rs12713437	2:61722904	T	ENSG00000082898	ENST00000481073	Transcript	upstream_gene_variant	-	-	-	-	-	-	IMPACT=MODIFIER;DISTANCE=1026;STRAND=-1;SYMBOL=XPO1;SYMBOL_SOURCE=HGNC;HGNC_ID=12825;NEAREST=USP34
rs12713437	2:61722904	T	ENSG00000082898	ENST00000489954	Transcript	downstream_gene_variant	-	-	-	-	-	-	IMPACT=MODIFIER;DISTANCE=3948;STRAND=-1;SYMBOL=XPO1;SYMBOL_SOURCE=HGNC;HGNC_ID=12825;NEAREST=USP34
rs6545872	2:61724568	A	ENSG00000082898	ENST00000401558	Transcript	intron_variant	-	-	-	-	-	-	IMPACT=MODIFIER;STRAND=-1;SYMBOL=XPO1;SYMBOL_SOURCE=HGNC;HGNC_ID=12825;NEAREST=USP34;INTRON=9/24
rs6545872	2:61724568	A	ENSG00000082898	ENST00000404992	Transcript	intron_variant	-	-	-	-	-	-	IMPACT=MODIFIER;STRAND=-1;SYMBOL=XPO1;SYMBOL_SOURCE=HGNC;HGNC_ID=12825;NEAREST=USP34;INTRON=9/24
rs6545872	2:61724568	A	ENSG00000082898	ENST00000406957	Transcript	intron_variant	-	-	-	-	-	-	IMPACT=MODIFIER;STRAND=-1;SYMBOL=XPO1;SYMBOL_SOURCE=HGNC;HGNC_ID=12825;NEAREST=USP34;INTRON=10/25
rs6545872	2:61724568	A	ENSG00000082898	ENST00000428210	Transcript	intron_variant,NMD_transcript_variant	-	-	-	-	-	-	IMPACT=MODIFIER;STRAND=-1;SYMBOL=XPO1;SYMBOL_SOURCE=HGNC;HGNC_ID=12825;NEAREST=USP34;INTRON=10/23
rs6545872	2:61724568	A	ENSG00000082898	ENST00000437159	Transcript	intron_variant,NMD_transcript_variant	-	-	-	-	-	-	IMPACT=MODIFIER;STRAND=-1;FLAGS=cds_start_NF;SYMBOL=XPO1;SYMBOL_SOURCE=HGNC;HGNC_ID=12825;NEAREST=USP34;INTRON=5/5
rs6545872	2:61724568	A	ENSG00000082898	ENST00000443240	Transcript	downstream_gene_variant	-	-	-	-	-	-	IMPACT=MODIFIER;DISTANCE=4573;STRAND=-1;FLAGS=cds_end_NF;SYMBOL=XPO1;SYMBOL_SOURCE=HGNC;HGNC_ID=12825;NEAREST=USP34
rs6545872	2:61724568	A	ENSG00000082898	ENST00000451765	Transcript	downstream_gene_variant	-	-	-	-	-	-	IMPACT=MODIFIER;DISTANCE=2332;STRAND=-1;FLAGS=cds_end_NF;SYMBOL=XPO1;SYMBOL_SOURCE=HGNC;HGNC_ID=12825;NEAREST=USP34
rs6545872	2:61724568	A	ENSG00000082898	ENST00000460037	Transcript	upstream_gene_variant	-	-	-	-	-	-	IMPACT=MODIFIER;DISTANCE=1860;STRAND=-1;SYMBOL=XPO1;SYMBOL_SOURCE=HGNC;HGNC_ID=12825;NEAREST=USP34
rs6545872	2:61724568	A	ENSG00000082898	ENST00000468259	Transcript	downstream_gene_variant	-	-	-	-	-	-	IMPACT=MODIFIER;DISTANCE=4857;STRAND=-1;SYMBOL=XPO1;SYMBOL_SOURCE=HGNC;HGNC_ID=12825;NEAREST=USP34
rs6545872	2:61724568	A	ENSG00000082898	ENST00000469337	Transcript	upstream_gene_variant	-	-	-	-	-	-	IMPACT=MODIFIER;DISTANCE=4439;STRAND=-1;SYMBOL=XPO1;SYMBOL_SOURCE=HGNC;HGNC_ID=12825;NEAREST=USP34
rs6545872	2:61724568	A	ENSG00000082898	ENST00000475744	Transcript	intron_variant,non_coding_transcript_variant	-	-	-	-	-	-	IMPACT=MODIFIER;STRAND=-1;SYMBOL=XPO1;SYMBOL_SOURCE=HGNC;HGNC_ID=12825;NEAREST=USP34;INTRON=1/1
rs6545872	2:61724568	A	ENSG00000082898	ENST00000476585	Transcript	downstream_gene_variant	-	-	-	-	-	-	IMPACT=MODIFIER;DISTANCE=4713;STRAND=-1;SYMBOL=XPO1;SYMBOL_SOURCE=HGNC;HGNC_ID=12825;NEAREST=USP34
rs6545872	2:61724568	A	ENSG00000082898	ENST00000481073	Transcript	upstream_gene_variant	-	-	-	-	-	-	IMPACT=MODIFIER;DISTANCE=2690;STRAND=-1;SYMBOL=XPO1;SYMBOL_SOURCE=HGNC;HGNC_ID=12825;NEAREST=USP34
rs6545872	2:61724568	A	ENSG00000082898	ENST00000489954	Transcript	downstream_gene_variant	-	-	-	-	-	-	IMPACT=MODIFIER;DISTANCE=2284;STRAND=-1;SYMBOL=XPO1;SYMBOL_SOURCE=HGNC;HGNC_ID=12825;NEAREST=USP34
rs12713438	2:61725501	A	ENSG00000082898	ENST00000401558	Transcript	intron_variant	-	-	-	-	-	-	IMPACT=MODIFIER;STRAND=-1;SYMBOL=XPO1;SYMBOL_SOURCE=HGNC;HGNC_ID=12825;NEAREST=USP34;INTRON=9/24
rs12713438	2:61725501	A	ENSG00000082898	ENST00000404992	Transcript	intron_variant	-	-	-	-	-	-	IMPACT=MODIFIER;STRAND=-1;SYMBOL=XPO1;SYMBOL_SOURCE=HGNC;HGNC_ID=12825;NEAREST=USP34;INTRON=9/24
rs12713438	2:61725501	A	ENSG00000082898	ENST00000406957	Transcript	intron_variant	-	-	-	-	-	-	IMPACT=MODIFIER;STRAND=-1;SYMBOL=XPO1;SYMBOL_SOURCE=HGNC;HGNC_ID=12825;NEAREST=USP34;INTRON=10/25
rs12713438	2:61725501	A	ENSG00000082898	ENST00000428210	Transcript	intron_variant,NMD_transcript_variant	-	-	-	-	-	-	IMPACT=MODIFIER;STRAND=-1;SYMBOL=XPO1;SYMBOL_SOURCE=HGNC;HGNC_ID=12825;NEAREST=USP34;INTRON=10/23
rs12713438	2:61725501	A	ENSG00000082898	ENST00000437159	Transcript	intron_variant,NMD_transcript_variant	-	-	-	-	-	-	IMPACT=MODIFIER;STRAND=-1;FLAGS=cds_start_NF;SYMBOL=XPO1;SYMBOL_SOURCE=HGNC;HGNC_ID=12825;NEAREST=USP34;INTRON=5/5
rs12713438	2:61725501	A	ENSG00000082898	ENST00000443240	Transcript	downstream_gene_variant	-	-	-	-	-	-	IMPACT=MODIFIER;DISTANCE=3640;STRAND=-1;FLAGS=cds_end_NF;SYMBOL=XPO1;SYMBOL_SOURCE=HGNC;HGNC_ID=12825;NEAREST=USP34
rs12713438	2:61725501	A	ENSG00000082898	ENST00000451765	Transcript	downstream_gene_variant	-	-	-	-	-	-	IMPACT=MODIFIER;DISTANCE=1399;STRAND=-1;FLAGS=cds_end_NF;SYMBOL=XPO1;SYMBOL_SOURCE=HGNC;HGNC_ID=12825;NEAREST=USP34
rs12713438	2:61725501	A	ENSG00000082898	ENST00000460037	Transcript	upstream_gene_variant	-	-	-	-	-	-	IMPACT=MODIFIER;DISTANCE=2793;STRAND=-1;SYMBOL=XPO1;SYMBOL_SOURCE=HGNC;HGNC_ID=12825;NEAREST=USP34
rs12713438	2:61725501	A	ENSG00000082898	ENST00000468259	Transcript	downstream_gene_variant	-	-	-	-	-	-	IMPACT=MODIFIER;DISTANCE=3924;STRAND=-1;SYMBOL=XPO1;SYMBOL_SOURCE=HGNC;HGNC_ID=12825;NEAREST=USP34
rs12713438	2:61725501	A	ENSG00000082898	ENST00000475744	Transcript	intron_variant,non_coding_transcript_variant	-	-	-	-	-	-	IMPACT=MODIFIER;STRAND=-1;SYMBOL=XPO1;SYMBOL_SOURCE=HGNC;HGNC_ID=12825;NEAREST=USP34;INTRON=1/1
rs12713438	2:61725501	A	ENSG00000082898	ENST00000476585	Transcript	downstream_gene_variant	-	-	-	-	-	-	IMPACT=MODIFIER;DISTANCE=3780;STRAND=-1;SYMBOL=XPO1;SYMBOL_SOURCE=HGNC;HGNC_ID=12825;NEAREST=USP34
rs12713438	2:61725501	A	ENSG00000082898	ENST00000481073	Transcript	upstream_gene_variant	-	-	-	-	-	-	IMPACT=MODIFIER;DISTANCE=3623;STRAND=-1;SYMBOL=XPO1;SYMBOL_SOURCE=HGNC;HGNC_ID=12825;NEAREST=USP34
rs12713438	2:61725501	A	ENSG00000082898	ENST00000489954	Transcript	downstream_gene_variant	-	-	-	-	-	-	IMPACT=MODIFIER;DISTANCE=1351;STRAND=-1;SYMBOL=XPO1;SYMBOL_SOURCE=HGNC;HGNC_ID=12825;NEAREST=USP34
rs6718887	2:61727215	A	ENSG00000082898	ENST00000401558	Transcript	intron_variant	-	-	-	-	-	-	IMPACT=MODIFIER;STRAND=-1;SYMBOL=XPO1;SYMBOL_SOURCE=HGNC;HGNC_ID=12825;NEAREST=USP34;INTRON=6/24
rs6718887	2:61727215	A	ENSG00000082898	ENST00000404992	Transcript	intron_variant	-	-	-	-	-	-	IMPACT=MODIFIER;STRAND=-1;SYMBOL=XPO1;SYMBOL_SOURCE=HGNC;HGNC_ID=12825;NEAREST=USP34;INTRON=6/24
rs6718887	2:61727215	A	ENSG00000082898	ENST00000406957	Transcript	intron_variant	-	-	-	-	-	-	IMPACT=MODIFIER;STRAND=-1;SYMBOL=XPO1;SYMBOL_SOURCE=HGNC;HGNC_ID=12825;NEAREST=USP34;INTRON=7/25
rs6718887	2:61727215	A	ENSG00000082898	ENST00000428210	Transcript	intron_variant,NMD_transcript_variant	-	-	-	-	-	-	IMPACT=MODIFIER;STRAND=-1;SYMBOL=XPO1;SYMBOL_SOURCE=HGNC;HGNC_ID=12825;NEAREST=USP34;INTRON=7/23
rs6718887	2:61727215	A	ENSG00000082898	ENST00000437159	Transcript	intron_variant,NMD_transcript_variant	-	-	-	-	-	-	IMPACT=MODIFIER;STRAND=-1;FLAGS=cds_start_NF;SYMBOL=XPO1;SYMBOL_SOURCE=HGNC;HGNC_ID=12825;NEAREST=USP34;INTRON=2/5
rs6718887	2:61727215	A	ENSG00000082898	ENST00000443240	Transcript	downstream_gene_variant	-	-	-	-	-	-	IMPACT=MODIFIER;DISTANCE=1926;STRAND=-1;FLAGS=cds_end_NF;SYMBOL=XPO1;SYMBOL_SOURCE=HGNC;HGNC_ID=12825;NEAREST=USP34
rs6718887	2:61727215	A	ENSG00000082898	ENST00000451765	Transcript	intron_variant	-	-	-	-	-	-	IMPACT=MODIFIER;STRAND=-1;FLAGS=cds_end_NF;SYMBOL=XPO1;SYMBOL_SOURCE=HGNC;HGNC_ID=12825;NEAREST=USP34;INTRON=6/6
rs6718887	2:61727215	A	ENSG00000082898	ENST00000460037	Transcript	upstream_gene_variant	-	-	-	-	-	-	IMPACT=MODIFIER;DISTANCE=4507;STRAND=-1;SYMBOL=XPO1;SYMBOL_SOURCE=HGNC;HGNC_ID=12825;NEAREST=USP34
rs6718887	2:61727215	A	ENSG00000082898	ENST00000468259	Transcript	downstream_gene_variant	-	-	-	-	-	-	IMPACT=MODIFIER;DISTANCE=2210;STRAND=-1;SYMBOL=XPO1;SYMBOL_SOURCE=HGNC;HGNC_ID=12825;NEAREST=USP34
rs6718887	2:61727215	A	ENSG00000082898	ENST00000475744	Transcript	upstream_gene_variant	-	-	-	-	-	-	IMPACT=MODIFIER;DISTANCE=1206;STRAND=-1;SYMBOL=XPO1;SYMBOL_SOURCE=HGNC;HGNC_ID=12825;NEAREST=USP34
rs6718887	2:61727215	A	ENSG00000082898	ENST00000476585	Transcript	downstream_gene_variant	-	-	-	-	-	-	IMPACT=MODIFIER;DISTANCE=2066;STRAND=-1;SYMBOL=XPO1;SYMBOL_SOURCE=HGNC;HGNC_ID=12825;NEAREST=USP34
rs6718887	2:61727215	A	ENSG00000082898	ENST00000489954	Transcript	intron_variant,non_coding_transcript_variant	-	-	-	-	-	-	IMPACT=MODIFIER;STRAND=-1;SYMBOL=XPO1;SYMBOL_SOURCE=HGNC;HGNC_ID=12825;NEAREST=USP34;INTRON=2/2
rs2305155	2:61729258	G	ENSG00000082898	ENST00000401558	Transcript	intron_variant	-	-	-	-	-	-	IMPACT=MODIFIER;STRAND=-1;SYMBOL=XPO1;SYMBOL_SOURCE=HGNC;HGNC_ID=12825;NEAREST=USP34;INTRON=5/24
rs2305155	2:61729258	G	ENSG00000082898	ENST00000404992	Transcript	intron_variant	-	-	-	-	-	-	IMPACT=MODIFIER;STRAND=-1;SYMBOL=XPO1;SYMBOL_SOURCE=HGNC;HGNC_ID=12825;NEAREST=USP34;INTRON=5/24
rs2305155	2:61729258	G	ENSG00000082898	ENST00000406957	Transcript	intron_variant	-	-	-	-	-	-	IMPACT=MODIFIER;STRAND=-1;SYMBOL=XPO1;SYMBOL_SOURCE=HGNC;HGNC_ID=12825;NEAREST=USP34;INTRON=6/25
rs2305155	2:61729258	G	ENSG00000082898	ENST00000428210	Transcript	intron_variant,NMD_transcript_variant	-	-	-	-	-	-	IMPACT=MODIFIER;STRAND=-1;SYMBOL=XPO1;SYMBOL_SOURCE=HGNC;HGNC_ID=12825;NEAREST=USP34;INTRON=6/23
rs2305155	2:61729258	G	ENSG00000082898	ENST00000437159	Transcript	intron_variant,NMD_transcript_variant	-	-	-	-	-	-	IMPACT=MODIFIER;STRAND=-1;FLAGS=cds_start_NF;SYMBOL=XPO1;SYMBOL_SOURCE=HGNC;HGNC_ID=12825;NEAREST=USP34;INTRON=2/5
rs2305155	2:61729258	G	ENSG00000082898	ENST00000443240	Transcript	intron_variant	-	-	-	-	-	-	IMPACT=MODIFIER;STRAND=-1;FLAGS=cds_end_NF;SYMBOL=XPO1;SYMBOL_SOURCE=HGNC;HGNC_ID=12825;NEAREST=USP34;INTRON=6/6
rs2305155	2:61729258	G	ENSG00000082898	ENST00000451765	Transcript	intron_variant	-	-	-	-	-	-	IMPACT=MODIFIER;STRAND=-1;FLAGS=cds_end_NF;SYMBOL=XPO1;SYMBOL_SOURCE=HGNC;HGNC_ID=12825;NEAREST=USP34;INTRON=5/6
rs2305155	2:61729258	G	ENSG00000082898	ENST00000468259	Transcript	downstream_gene_variant	-	-	-	-	-	-	IMPACT=MODIFIER;DISTANCE=167;STRAND=-1;SYMBOL=XPO1;SYMBOL_SOURCE=HGNC;HGNC_ID=12825;NEAREST=USP34
rs2305155	2:61729258	G	ENSG00000082898	ENST00000475744	Transcript	upstream_gene_variant	-	-	-	-	-	-	IMPACT=MODIFIER;DISTANCE=3249;STRAND=-1;SYMBOL=XPO1;SYMBOL_SOURCE=HGNC;HGNC_ID=12825;NEAREST=USP34
rs2305155	2:61729258	G	ENSG00000082898	ENST00000476585	Transcript	downstream_gene_variant	-	-	-	-	-	-	IMPACT=MODIFIER;DISTANCE=23;STRAND=-1;SYMBOL=XPO1;SYMBOL_SOURCE=HGNC;HGNC_ID=12825;NEAREST=USP34
rs2305155	2:61729258	G	ENSG00000082898	ENST00000489954	Transcript	intron_variant,non_coding_transcript_variant	-	-	-	-	-	-	IMPACT=MODIFIER;STRAND=-1;SYMBOL=XPO1;SYMBOL_SOURCE=HGNC;HGNC_ID=12825;NEAREST=USP34;INTRON=1/2
rs2305156	2:61729268	C	ENSG00000082898	ENST00000401558	Transcript	intron_variant	-	-	-	-	-	-	IMPACT=MODIFIER;STRAND=-1;SYMBOL=XPO1;SYMBOL_SOURCE=HGNC;HGNC_ID=12825;NEAREST=USP34;INTRON=5/24
rs2305156	2:61729268	C	ENSG00000082898	ENST00000404992	Transcript	intron_variant	-	-	-	-	-	-	IMPACT=MODIFIER;STRAND=-1;SYMBOL=XPO1;SYMBOL_SOURCE=HGNC;HGNC_ID=12825;NEAREST=USP34;INTRON=5/24
rs2305156	2:61729268	C	ENSG00000082898	ENST00000406957	Transcript	intron_variant	-	-	-	-	-	-	IMPACT=MODIFIER;STRAND=-1;SYMBOL=XPO1;SYMBOL_SOURCE=HGNC;HGNC_ID=12825;NEAREST=USP34;INTRON=6/25
rs2305156	2:61729268	C	ENSG00000082898	ENST00000428210	Transcript	intron_variant,NMD_transcript_variant	-	-	-	-	-	-	IMPACT=MODIFIER;STRAND=-1;SYMBOL=XPO1;SYMBOL_SOURCE=HGNC;HGNC_ID=12825;NEAREST=USP34;INTRON=6/23
rs2305156	2:61729268	C	ENSG00000082898	ENST00000437159	Transcript	intron_variant,NMD_transcript_variant	-	-	-	-	-	-	IMPACT=MODIFIER;STRAND=-1;FLAGS=cds_start_NF;SYMBOL=XPO1;SYMBOL_SOURCE=HGNC;HGNC_ID=12825;NEAREST=USP34;INTRON=2/5
rs2305156	2:61729268	C	ENSG00000082898	ENST00000443240	Transcript	intron_variant	-	-	-	-	-	-	IMPACT=MODIFIER;STRAND=-1;FLAGS=cds_end_NF;SYMBOL=XPO1;SYMBOL_SOURCE=HGNC;HGNC_ID=12825;NEAREST=USP34;INTRON=6/6
rs2305156	2:61729268	C	ENSG00000082898	ENST00000451765	Transcript	intron_variant	-	-	-	-	-	-	IMPACT=MODIFIER;STRAND=-1;FLAGS=cds_end_NF;SYMBOL=XPO1;SYMBOL_SOURCE=HGNC;HGNC_ID=12825;NEAREST=USP34;INTRON=5/6
rs2305156	2:61729268	C	ENSG00000082898	ENST00000468259	Transcript	downstream_gene_variant	-	-	-	-	-	-	IMPACT=MODIFIER;DISTANCE=157;STRAND=-1;SYMBOL=XPO1;SYMBOL_SOURCE=HGNC;HGNC_ID=12825;NEAREST=USP34
rs2305156	2:61729268	C	ENSG00000082898	ENST00000475744	Transcript	upstream_gene_variant	-	-	-	-	-	-	IMPACT=MODIFIER;DISTANCE=3259;STRAND=-1;SYMBOL=XPO1;SYMBOL_SOURCE=HGNC;HGNC_ID=12825;NEAREST=USP34
rs2305156	2:61729268	C	ENSG00000082898	ENST00000476585	Transcript	downstream_gene_variant	-	-	-	-	-	-	IMPACT=MODIFIER;DISTANCE=13;STRAND=-1;SYMBOL=XPO1;SYMBOL_SOURCE=HGNC;HGNC_ID=12825;NEAREST=USP34
rs2305156	2:61729268	C	ENSG00000082898	ENST00000489954	Transcript	intron_variant,non_coding_transcript_variant	-	-	-	-	-	-	IMPACT=MODIFIER;STRAND=-1;SYMBOL=XPO1;SYMBOL_SOURCE=HGNC;HGNC_ID=12825;NEAREST=USP34;INTRON=1/2
rs12612677	2:61729695	C	ENSG00000082898	ENST00000401558	Transcript	intron_variant	-	-	-	-	-	-	IMPACT=MODIFIER;STRAND=-1;SYMBOL=XPO1;SYMBOL_SOURCE=HGNC;HGNC_ID=12825;NEAREST=XPO1;INTRON=4/24
rs12612677	2:61729695	C	ENSG00000082898	ENST00000404992	Transcript	intron_variant	-	-	-	-	-	-	IMPACT=MODIFIER;STRAND=-1;SYMBOL=XPO1;SYMBOL_SOURCE=HGNC;HGNC_ID=12825;NEAREST=XPO1;INTRON=4/24
rs12612677	2:61729695	C	ENSG00000082898	ENST00000406957	Transcript	intron_variant	-	-	-	-	-	-	IMPACT=MODIFIER;STRAND=-1;SYMBOL=XPO1;SYMBOL_SOURCE=HGNC;HGNC_ID=12825;NEAREST=XPO1;INTRON=5/25
rs12612677	2:61729695	C	ENSG00000082898	ENST00000428210	Transcript	intron_variant,NMD_transcript_variant	-	-	-	-	-	-	IMPACT=MODIFIER;STRAND=-1;SYMBOL=XPO1;SYMBOL_SOURCE=HGNC;HGNC_ID=12825;NEAREST=XPO1;INTRON=5/23
rs12612677	2:61729695	C	ENSG00000082898	ENST00000437159	Transcript	intron_variant,NMD_transcript_variant	-	-	-	-	-	-	IMPACT=MODIFIER;STRAND=-1;FLAGS=cds_start_NF;SYMBOL=XPO1;SYMBOL_SOURCE=HGNC;HGNC_ID=12825;NEAREST=XPO1;INTRON=2/5
rs12612677	2:61729695	C	ENSG00000082898	ENST00000443240	Transcript	intron_variant	-	-	-	-	-	-	IMPACT=MODIFIER;STRAND=-1;FLAGS=cds_end_NF;SYMBOL=XPO1;SYMBOL_SOURCE=HGNC;HGNC_ID=12825;NEAREST=XPO1;INTRON=5/6
rs12612677	2:61729695	C	ENSG00000082898	ENST00000451765	Transcript	intron_variant	-	-	-	-	-	-	IMPACT=MODIFIER;STRAND=-1;FLAGS=cds_end_NF;SYMBOL=XPO1;SYMBOL_SOURCE=HGNC;HGNC_ID=12825;NEAREST=XPO1;INTRON=4/6
rs12612677	2:61729695	C	ENSG00000082898	ENST00000468259	Transcript	intron_variant,non_coding_transcript_variant	-	-	-	-	-	-	IMPACT=MODIFIER;STRAND=-1;SYMBOL=XPO1;SYMBOL_SOURCE=HGNC;HGNC_ID=12825;NEAREST=XPO1;INTRON=2/2
rs12612677	2:61729695	C	ENSG00000082898	ENST00000475744	Transcript	upstream_gene_variant	-	-	-	-	-	-	IMPACT=MODIFIER;DISTANCE=3686;STRAND=-1;SYMBOL=XPO1;SYMBOL_SOURCE=HGNC;HGNC_ID=12825;NEAREST=XPO1
rs12612677	2:61729695	C	ENSG00000082898	ENST00000476585	Transcript	intron_variant,non_coding_transcript_variant	-	-	-	-	-	-	IMPACT=MODIFIER;STRAND=-1;SYMBOL=XPO1;SYMBOL_SOURCE=HGNC;HGNC_ID=12825;NEAREST=XPO1;INTRON=2/2
rs12612677	2:61729695	C	ENSG00000082898	ENST00000489954	Transcript	non_coding_transcript_exon_variant	49	-	-	-	-	-	IMPACT=MODIFIER;STRAND=-1;SYMBOL=XPO1;SYMBOL_SOURCE=HGNC;HGNC_ID=12825;NEAREST=XPO1;EXON=1/3
rs6734830	2:61731112	A	ENSG00000082898	ENST00000401558	Transcript	intron_variant	-	-	-	-	-	-	IMPACT=MODIFIER;STRAND=-1;SYMBOL=XPO1;SYMBOL_SOURCE=HGNC;HGNC_ID=12825;NEAREST=XPO1;INTRON=4/24
rs6734830	2:61731112	A	ENSG00000082898	ENST00000404992	Transcript	intron_variant	-	-	-	-	-	-	IMPACT=MODIFIER;STRAND=-1;SYMBOL=XPO1;SYMBOL_SOURCE=HGNC;HGNC_ID=12825;NEAREST=XPO1;INTRON=4/24
rs6734830	2:61731112	A	ENSG00000082898	ENST00000406957	Transcript	intron_variant	-	-	-	-	-	-	IMPACT=MODIFIER;STRAND=-1;SYMBOL=XPO1;SYMBOL_SOURCE=HGNC;HGNC_ID=12825;NEAREST=XPO1;INTRON=5/25
rs6734830	2:61731112	A	ENSG00000082898	ENST00000428210	Transcript	intron_variant,NMD_transcript_variant	-	-	-	-	-	-	IMPACT=MODIFIER;STRAND=-1;SYMBOL=XPO1;SYMBOL_SOURCE=HGNC;HGNC_ID=12825;NEAREST=XPO1;INTRON=5/23
rs6734830	2:61731112	A	ENSG00000082898	ENST00000437159	Transcript	intron_variant,NMD_transcript_variant	-	-	-	-	-	-	IMPACT=MODIFIER;STRAND=-1;FLAGS=cds_start_NF;SYMBOL=XPO1;SYMBOL_SOURCE=HGNC;HGNC_ID=12825;NEAREST=XPO1;INTRON=2/5
rs6734830	2:61731112	A	ENSG00000082898	ENST00000443240	Transcript	intron_variant	-	-	-	-	-	-	IMPACT=MODIFIER;STRAND=-1;FLAGS=cds_end_NF;SYMBOL=XPO1;SYMBOL_SOURCE=HGNC;HGNC_ID=12825;NEAREST=XPO1;INTRON=5/6
rs6734830	2:61731112	A	ENSG00000082898	ENST00000451765	Transcript	intron_variant	-	-	-	-	-	-	IMPACT=MODIFIER;STRAND=-1;FLAGS=cds_end_NF;SYMBOL=XPO1;SYMBOL_SOURCE=HGNC;HGNC_ID=12825;NEAREST=XPO1;INTRON=4/6
rs6734830	2:61731112	A	ENSG00000082898	ENST00000468259	Transcript	intron_variant,non_coding_transcript_variant	-	-	-	-	-	-	IMPACT=MODIFIER;STRAND=-1;SYMBOL=XPO1;SYMBOL_SOURCE=HGNC;HGNC_ID=12825;NEAREST=XPO1;INTRON=2/2
rs6734830	2:61731112	A	ENSG00000082898	ENST00000476585	Transcript	intron_variant,non_coding_transcript_variant	-	-	-	-	-	-	IMPACT=MODIFIER;STRAND=-1;SYMBOL=XPO1;SYMBOL_SOURCE=HGNC;HGNC_ID=12825;NEAREST=XPO1;INTRON=2/2
rs6734830	2:61731112	A	ENSG00000082898	ENST00000489954	Transcript	upstream_gene_variant	-	-	-	-	-	-	IMPACT=MODIFIER;DISTANCE=1369;STRAND=-1;SYMBOL=XPO1;SYMBOL_SOURCE=HGNC;HGNC_ID=12825;NEAREST=XPO1
rs9807965	2:61732159	C	ENSG00000082898	ENST00000401558	Transcript	intron_variant	-	-	-	-	-	-	IMPACT=MODIFIER;STRAND=-1;SYMBOL=XPO1;SYMBOL_SOURCE=HGNC;HGNC_ID=12825;NEAREST=XPO1;INTRON=4/24
rs9807965	2:61732159	C	ENSG00000082898	ENST00000404992	Transcript	intron_variant	-	-	-	-	-	-	IMPACT=MODIFIER;STRAND=-1;SYMBOL=XPO1;SYMBOL_SOURCE=HGNC;HGNC_ID=12825;NEAREST=XPO1;INTRON=4/24
rs9807965	2:61732159	C	ENSG00000082898	ENST00000406957	Transcript	intron_variant	-	-	-	-	-	-	IMPACT=MODIFIER;STRAND=-1;SYMBOL=XPO1;SYMBOL_SOURCE=HGNC;HGNC_ID=12825;NEAREST=XPO1;INTRON=5/25
rs9807965	2:61732159	C	ENSG00000082898	ENST00000428210	Transcript	intron_variant,NMD_transcript_variant	-	-	-	-	-	-	IMPACT=MODIFIER;STRAND=-1;SYMBOL=XPO1;SYMBOL_SOURCE=HGNC;HGNC_ID=12825;NEAREST=XPO1;INTRON=5/23
rs9807965	2:61732159	C	ENSG00000082898	ENST00000437159	Transcript	intron_variant,NMD_transcript_variant	-	-	-	-	-	-	IMPACT=MODIFIER;STRAND=-1;FLAGS=cds_start_NF;SYMBOL=XPO1;SYMBOL_SOURCE=HGNC;HGNC_ID=12825;NEAREST=XPO1;INTRON=2/5
rs9807965	2:61732159	C	ENSG00000082898	ENST00000443240	Transcript	intron_variant	-	-	-	-	-	-	IMPACT=MODIFIER;STRAND=-1;FLAGS=cds_end_NF;SYMBOL=XPO1;SYMBOL_SOURCE=HGNC;HGNC_ID=12825;NEAREST=XPO1;INTRON=5/6
rs9807965	2:61732159	C	ENSG00000082898	ENST00000451765	Transcript	intron_variant	-	-	-	-	-	-	IMPACT=MODIFIER;STRAND=-1;FLAGS=cds_end_NF;SYMBOL=XPO1;SYMBOL_SOURCE=HGNC;HGNC_ID=12825;NEAREST=XPO1;INTRON=4/6
rs9807965	2:61732159	C	ENSG00000082898	ENST00000468259	Transcript	intron_variant,non_coding_transcript_variant	-	-	-	-	-	-	IMPACT=MODIFIER;STRAND=-1;SYMBOL=XPO1;SYMBOL_SOURCE=HGNC;HGNC_ID=12825;NEAREST=XPO1;INTRON=2/2
rs9807965	2:61732159	C	ENSG00000082898	ENST00000476585	Transcript	intron_variant,non_coding_transcript_variant	-	-	-	-	-	-	IMPACT=MODIFIER;STRAND=-1;SYMBOL=XPO1;SYMBOL_SOURCE=HGNC;HGNC_ID=12825;NEAREST=XPO1;INTRON=2/2
rs9807965	2:61732159	C	ENSG00000082898	ENST00000489954	Transcript	upstream_gene_variant	-	-	-	-	-	-	IMPACT=MODIFIER;DISTANCE=2416;STRAND=-1;SYMBOL=XPO1;SYMBOL_SOURCE=HGNC;HGNC_ID=12825;NEAREST=XPO1
rs6545873	2:61733012	C	ENSG00000082898	ENST00000401558	Transcript	intron_variant	-	-	-	-	-	-	IMPACT=MODIFIER;STRAND=-1;SYMBOL=XPO1;SYMBOL_SOURCE=HGNC;HGNC_ID=12825;NEAREST=XPO1;INTRON=4/24
rs6545873	2:61733012	C	ENSG00000082898	ENST00000404992	Transcript	intron_variant	-	-	-	-	-	-	IMPACT=MODIFIER;STRAND=-1;SYMBOL=XPO1;SYMBOL_SOURCE=HGNC;HGNC_ID=12825;NEAREST=XPO1;INTRON=4/24
rs6545873	2:61733012	C	ENSG00000082898	ENST00000406957	Transcript	intron_variant	-	-	-	-	-	-	IMPACT=MODIFIER;STRAND=-1;SYMBOL=XPO1;SYMBOL_SOURCE=HGNC;HGNC_ID=12825;NEAREST=XPO1;INTRON=5/25
rs6545873	2:61733012	C	ENSG00000082898	ENST00000428210	Transcript	intron_variant,NMD_transcript_variant	-	-	-	-	-	-	IMPACT=MODIFIER;STRAND=-1;SYMBOL=XPO1;SYMBOL_SOURCE=HGNC;HGNC_ID=12825;NEAREST=XPO1;INTRON=5/23
rs6545873	2:61733012	C	ENSG00000082898	ENST00000437159	Transcript	intron_variant,NMD_transcript_variant	-	-	-	-	-	-	IMPACT=MODIFIER;STRAND=-1;FLAGS=cds_start_NF;SYMBOL=XPO1;SYMBOL_SOURCE=HGNC;HGNC_ID=12825;NEAREST=XPO1;INTRON=2/5
rs6545873	2:61733012	C	ENSG00000082898	ENST00000443240	Transcript	intron_variant	-	-	-	-	-	-	IMPACT=MODIFIER;STRAND=-1;FLAGS=cds_end_NF;SYMBOL=XPO1;SYMBOL_SOURCE=HGNC;HGNC_ID=12825;NEAREST=XPO1;INTRON=5/6
rs6545873	2:61733012	C	ENSG00000082898	ENST00000451765	Transcript	intron_variant	-	-	-	-	-	-	IMPACT=MODIFIER;STRAND=-1;FLAGS=cds_end_NF;SYMBOL=XPO1;SYMBOL_SOURCE=HGNC;HGNC_ID=12825;NEAREST=XPO1;INTRON=4/6
rs6545873	2:61733012	C	ENSG00000082898	ENST00000468259	Transcript	intron_variant,non_coding_transcript_variant	-	-	-	-	-	-	IMPACT=MODIFIER;STRAND=-1;SYMBOL=XPO1;SYMBOL_SOURCE=HGNC;HGNC_ID=12825;NEAREST=XPO1;INTRON=2/2
rs6545873	2:61733012	C	ENSG00000082898	ENST00000476585	Transcript	intron_variant,non_coding_transcript_variant	-	-	-	-	-	-	IMPACT=MODIFIER;STRAND=-1;SYMBOL=XPO1;SYMBOL_SOURCE=HGNC;HGNC_ID=12825;NEAREST=XPO1;INTRON=2/2
rs6545873	2:61733012	C	ENSG00000082898	ENST00000489954	Transcript	upstream_gene_variant	-	-	-	-	-	-	IMPACT=MODIFIER;DISTANCE=3269;STRAND=-1;SYMBOL=XPO1;SYMBOL_SOURCE=HGNC;HGNC_ID=12825;NEAREST=XPO1
rs766447	2:61735569	T	ENSG00000082898	ENST00000401558	Transcript	intron_variant	-	-	-	-	-	-	IMPACT=MODIFIER;STRAND=-1;SYMBOL=XPO1;SYMBOL_SOURCE=HGNC;HGNC_ID=12825;NEAREST=XPO1;INTRON=4/24
rs766447	2:61735569	T	ENSG00000082898	ENST00000404992	Transcript	intron_variant	-	-	-	-	-	-	IMPACT=MODIFIER;STRAND=-1;SYMBOL=XPO1;SYMBOL_SOURCE=HGNC;HGNC_ID=12825;NEAREST=XPO1;INTRON=4/24
rs766447	2:61735569	T	ENSG00000082898	ENST00000406957	Transcript	intron_variant	-	-	-	-	-	-	IMPACT=MODIFIER;STRAND=-1;SYMBOL=XPO1;SYMBOL_SOURCE=HGNC;HGNC_ID=12825;NEAREST=XPO1;INTRON=5/25
rs766447	2:61735569	T	ENSG00000082898	ENST00000428210	Transcript	intron_variant,NMD_transcript_variant	-	-	-	-	-	-	IMPACT=MODIFIER;STRAND=-1;SYMBOL=XPO1;SYMBOL_SOURCE=HGNC;HGNC_ID=12825;NEAREST=XPO1;INTRON=5/23
rs766447	2:61735569	T	ENSG00000082898	ENST00000437159	Transcript	intron_variant,NMD_transcript_variant	-	-	-	-	-	-	IMPACT=MODIFIER;STRAND=-1;FLAGS=cds_start_NF;SYMBOL=XPO1;SYMBOL_SOURCE=HGNC;HGNC_ID=12825;NEAREST=XPO1;INTRON=2/5
rs766447	2:61735569	T	ENSG00000082898	ENST00000443240	Transcript	intron_variant	-	-	-	-	-	-	IMPACT=MODIFIER;STRAND=-1;FLAGS=cds_end_NF;SYMBOL=XPO1;SYMBOL_SOURCE=HGNC;HGNC_ID=12825;NEAREST=XPO1;INTRON=5/6
rs766447	2:61735569	T	ENSG00000082898	ENST00000451765	Transcript	intron_variant	-	-	-	-	-	-	IMPACT=MODIFIER;STRAND=-1;FLAGS=cds_end_NF;SYMBOL=XPO1;SYMBOL_SOURCE=HGNC;HGNC_ID=12825;NEAREST=XPO1;INTRON=4/6
rs766447	2:61735569	T	ENSG00000082898	ENST00000468259	Transcript	intron_variant,non_coding_transcript_variant	-	-	-	-	-	-	IMPACT=MODIFIER;STRAND=-1;SYMBOL=XPO1;SYMBOL_SOURCE=HGNC;HGNC_ID=12825;NEAREST=XPO1;INTRON=2/2
rs766447	2:61735569	T	ENSG00000082898	ENST00000476585	Transcript	intron_variant,non_coding_transcript_variant	-	-	-	-	-	-	IMPACT=MODIFIER;STRAND=-1;SYMBOL=XPO1;SYMBOL_SOURCE=HGNC;HGNC_ID=12825;NEAREST=XPO1;INTRON=2/2
rs7557230	2:61736652	T	ENSG00000082898	ENST00000401558	Transcript	intron_variant	-	-	-	-	-	-	IMPACT=MODIFIER;STRAND=-1;SYMBOL=XPO1;SYMBOL_SOURCE=HGNC;HGNC_ID=12825;NEAREST=XPO1;INTRON=4/24
rs7557230	2:61736652	T	ENSG00000082898	ENST00000404992	Transcript	intron_variant	-	-	-	-	-	-	IMPACT=MODIFIER;STRAND=-1;SYMBOL=XPO1;SYMBOL_SOURCE=HGNC;HGNC_ID=12825;NEAREST=XPO1;INTRON=4/24
rs7557230	2:61736652	T	ENSG00000082898	ENST00000406957	Transcript	intron_variant	-	-	-	-	-	-	IMPACT=MODIFIER;STRAND=-1;SYMBOL=XPO1;SYMBOL_SOURCE=HGNC;HGNC_ID=12825;NEAREST=XPO1;INTRON=5/25
rs7557230	2:61736652	T	ENSG00000082898	ENST00000428210	Transcript	intron_variant,NMD_transcript_variant	-	-	-	-	-	-	IMPACT=MODIFIER;STRAND=-1;SYMBOL=XPO1;SYMBOL_SOURCE=HGNC;HGNC_ID=12825;NEAREST=XPO1;INTRON=5/23
rs7557230	2:61736652	T	ENSG00000082898	ENST00000437159	Transcript	intron_variant,NMD_transcript_variant	-	-	-	-	-	-	IMPACT=MODIFIER;STRAND=-1;FLAGS=cds_start_NF;SYMBOL=XPO1;SYMBOL_SOURCE=HGNC;HGNC_ID=12825;NEAREST=XPO1;INTRON=2/5
rs7557230	2:61736652	T	ENSG00000082898	ENST00000443240	Transcript	intron_variant	-	-	-	-	-	-	IMPACT=MODIFIER;STRAND=-1;FLAGS=cds_end_NF;SYMBOL=XPO1;SYMBOL_SOURCE=HGNC;HGNC_ID=12825;NEAREST=XPO1;INTRON=5/6
rs7557230	2:61736652	T	ENSG00000082898	ENST00000451765	Transcript	intron_variant	-	-	-	-	-	-	IMPACT=MODIFIER;STRAND=-1;FLAGS=cds_end_NF;SYMBOL=XPO1;SYMBOL_SOURCE=HGNC;HGNC_ID=12825;NEAREST=XPO1;INTRON=4/6
rs7557230	2:61736652	T	ENSG00000082898	ENST00000468259	Transcript	intron_variant,non_coding_transcript_variant	-	-	-	-	-	-	IMPACT=MODIFIER;STRAND=-1;SYMBOL=XPO1;SYMBOL_SOURCE=HGNC;HGNC_ID=12825;NEAREST=XPO1;INTRON=2/2
rs7557230	2:61736652	T	ENSG00000082898	ENST00000476585	Transcript	intron_variant,non_coding_transcript_variant	-	-	-	-	-	-	IMPACT=MODIFIER;STRAND=-1;SYMBOL=XPO1;SYMBOL_SOURCE=HGNC;HGNC_ID=12825;NEAREST=XPO1;INTRON=2/2
rs7561229	2:61737990	T	ENSG00000082898	ENST00000401558	Transcript	intron_variant	-	-	-	-	-	-	IMPACT=MODIFIER;STRAND=-1;SYMBOL=XPO1;SYMBOL_SOURCE=HGNC;HGNC_ID=12825;NEAREST=XPO1;INTRON=4/24
rs7561229	2:61737990	T	ENSG00000082898	ENST00000404992	Transcript	intron_variant	-	-	-	-	-	-	IMPACT=MODIFIER;STRAND=-1;SYMBOL=XPO1;SYMBOL_SOURCE=HGNC;HGNC_ID=12825;NEAREST=XPO1;INTRON=4/24
rs7561229	2:61737990	T	ENSG00000082898	ENST00000406957	Transcript	intron_variant	-	-	-	-	-	-	IMPACT=MODIFIER;STRAND=-1;SYMBOL=XPO1;SYMBOL_SOURCE=HGNC;HGNC_ID=12825;NEAREST=XPO1;INTRON=5/25
rs7561229	2:61737990	T	ENSG00000082898	ENST00000428210	Transcript	intron_variant,NMD_transcript_variant	-	-	-	-	-	-	IMPACT=MODIFIER;STRAND=-1;SYMBOL=XPO1;SYMBOL_SOURCE=HGNC;HGNC_ID=12825;NEAREST=XPO1;INTRON=5/23
rs7561229	2:61737990	T	ENSG00000082898	ENST00000437159	Transcript	intron_variant,NMD_transcript_variant	-	-	-	-	-	-	IMPACT=MODIFIER;STRAND=-1;FLAGS=cds_start_NF;SYMBOL=XPO1;SYMBOL_SOURCE=HGNC;HGNC_ID=12825;NEAREST=XPO1;INTRON=2/5
rs7561229	2:61737990	T	ENSG00000082898	ENST00000443240	Transcript	intron_variant	-	-	-	-	-	-	IMPACT=MODIFIER;STRAND=-1;FLAGS=cds_end_NF;SYMBOL=XPO1;SYMBOL_SOURCE=HGNC;HGNC_ID=12825;NEAREST=XPO1;INTRON=5/6
rs7561229	2:61737990	T	ENSG00000082898	ENST00000451765	Transcript	intron_variant	-	-	-	-	-	-	IMPACT=MODIFIER;STRAND=-1;FLAGS=cds_end_NF;SYMBOL=XPO1;SYMBOL_SOURCE=HGNC;HGNC_ID=12825;NEAREST=XPO1;INTRON=4/6
rs7561229	2:61737990	T	ENSG00000082898	ENST00000468259	Transcript	intron_variant,non_coding_transcript_variant	-	-	-	-	-	-	IMPACT=MODIFIER;STRAND=-1;SYMBOL=XPO1;SYMBOL_SOURCE=HGNC;HGNC_ID=12825;NEAREST=XPO1;INTRON=2/2
rs7561229	2:61737990	T	ENSG00000082898	ENST00000476585	Transcript	intron_variant,non_coding_transcript_variant	-	-	-	-	-	-	IMPACT=MODIFIER;STRAND=-1;SYMBOL=XPO1;SYMBOL_SOURCE=HGNC;HGNC_ID=12825;NEAREST=XPO1;INTRON=2/2
rs12986713	2:61740646	G	ENSG00000082898	ENST00000401558	Transcript	intron_variant	-	-	-	-	-	-	IMPACT=MODIFIER;STRAND=-1;SYMBOL=XPO1;SYMBOL_SOURCE=HGNC;HGNC_ID=12825;NEAREST=XPO1;INTRON=4/24
rs12986713	2:61740646	G	ENSG00000082898	ENST00000404992	Transcript	intron_variant	-	-	-	-	-	-	IMPACT=MODIFIER;STRAND=-1;SYMBOL=XPO1;SYMBOL_SOURCE=HGNC;HGNC_ID=12825;NEAREST=XPO1;INTRON=4/24
rs12986713	2:61740646	G	ENSG00000082898	ENST00000406957	Transcript	intron_variant	-	-	-	-	-	-	IMPACT=MODIFIER;STRAND=-1;SYMBOL=XPO1;SYMBOL_SOURCE=HGNC;HGNC_ID=12825;NEAREST=XPO1;INTRON=5/25
rs12986713	2:61740646	G	ENSG00000082898	ENST00000428210	Transcript	intron_variant,NMD_transcript_variant	-	-	-	-	-	-	IMPACT=MODIFIER;STRAND=-1;SYMBOL=XPO1;SYMBOL_SOURCE=HGNC;HGNC_ID=12825;NEAREST=XPO1;INTRON=5/23
rs12986713	2:61740646	G	ENSG00000082898	ENST00000437159	Transcript	intron_variant,NMD_transcript_variant	-	-	-	-	-	-	IMPACT=MODIFIER;STRAND=-1;FLAGS=cds_start_NF;SYMBOL=XPO1;SYMBOL_SOURCE=HGNC;HGNC_ID=12825;NEAREST=XPO1;INTRON=2/5
rs12986713	2:61740646	G	ENSG00000082898	ENST00000443240	Transcript	intron_variant	-	-	-	-	-	-	IMPACT=MODIFIER;STRAND=-1;FLAGS=cds_end_NF;SYMBOL=XPO1;SYMBOL_SOURCE=HGNC;HGNC_ID=12825;NEAREST=XPO1;INTRON=5/6
rs12986713	2:61740646	G	ENSG00000082898	ENST00000451765	Transcript	intron_variant	-	-	-	-	-	-	IMPACT=MODIFIER;STRAND=-1;FLAGS=cds_end_NF;SYMBOL=XPO1;SYMBOL_SOURCE=HGNC;HGNC_ID=12825;NEAREST=XPO1;INTRON=4/6
rs12986713	2:61740646	G	ENSG00000082898	ENST00000468259	Transcript	intron_variant,non_coding_transcript_variant	-	-	-	-	-	-	IMPACT=MODIFIER;STRAND=-1;SYMBOL=XPO1;SYMBOL_SOURCE=HGNC;HGNC_ID=12825;NEAREST=XPO1;INTRON=2/2
rs12986713	2:61740646	G	ENSG00000082898	ENST00000476585	Transcript	intron_variant,non_coding_transcript_variant	-	-	-	-	-	-	IMPACT=MODIFIER;STRAND=-1;SYMBOL=XPO1;SYMBOL_SOURCE=HGNC;HGNC_ID=12825;NEAREST=XPO1;INTRON=2/2
rs12617911	2:61740825	G	ENSG00000082898	ENST00000401558	Transcript	intron_variant	-	-	-	-	-	-	IMPACT=MODIFIER;STRAND=-1;SYMBOL=XPO1;SYMBOL_SOURCE=HGNC;HGNC_ID=12825;NEAREST=XPO1;INTRON=4/24
rs12617911	2:61740825	G	ENSG00000082898	ENST00000404992	Transcript	intron_variant	-	-	-	-	-	-	IMPACT=MODIFIER;STRAND=-1;SYMBOL=XPO1;SYMBOL_SOURCE=HGNC;HGNC_ID=12825;NEAREST=XPO1;INTRON=4/24
rs12617911	2:61740825	G	ENSG00000082898	ENST00000406957	Transcript	intron_variant	-	-	-	-	-	-	IMPACT=MODIFIER;STRAND=-1;SYMBOL=XPO1;SYMBOL_SOURCE=HGNC;HGNC_ID=12825;NEAREST=XPO1;INTRON=5/25
rs12617911	2:61740825	G	ENSG00000082898	ENST00000428210	Transcript	intron_variant,NMD_transcript_variant	-	-	-	-	-	-	IMPACT=MODIFIER;STRAND=-1;SYMBOL=XPO1;SYMBOL_SOURCE=HGNC;HGNC_ID=12825;NEAREST=XPO1;INTRON=5/23
rs12617911	2:61740825	G	ENSG00000082898	ENST00000437159	Transcript	intron_variant,NMD_transcript_variant	-	-	-	-	-	-	IMPACT=MODIFIER;STRAND=-1;FLAGS=cds_start_NF;SYMBOL=XPO1;SYMBOL_SOURCE=HGNC;HGNC_ID=12825;NEAREST=XPO1;INTRON=2/5
rs12617911	2:61740825	G	ENSG00000082898	ENST00000443240	Transcript	intron_variant	-	-	-	-	-	-	IMPACT=MODIFIER;STRAND=-1;FLAGS=cds_end_NF;SYMBOL=XPO1;SYMBOL_SOURCE=HGNC;HGNC_ID=12825;NEAREST=XPO1;INTRON=5/6
rs12617911	2:61740825	G	ENSG00000082898	ENST00000451765	Transcript	intron_variant	-	-	-	-	-	-	IMPACT=MODIFIER;STRAND=-1;FLAGS=cds_end_NF;SYMBOL=XPO1;SYMBOL_SOURCE=HGNC;HGNC_ID=12825;NEAREST=XPO1;INTRON=4/6
rs12617911	2:61740825	G	ENSG00000082898	ENST00000468259	Transcript	intron_variant,non_coding_transcript_variant	-	-	-	-	-	-	IMPACT=MODIFIER;STRAND=-1;SYMBOL=XPO1;SYMBOL_SOURCE=HGNC;HGNC_ID=12825;NEAREST=XPO1;INTRON=2/2
rs12617911	2:61740825	G	ENSG00000082898	ENST00000476585	Transcript	intron_variant,non_coding_transcript_variant	-	-	-	-	-	-	IMPACT=MODIFIER;STRAND=-1;SYMBOL=XPO1;SYMBOL_SOURCE=HGNC;HGNC_ID=12825;NEAREST=XPO1;INTRON=2/2
rs7563678	2:61741811	C	ENSG00000082898	ENST00000401558	Transcript	intron_variant	-	-	-	-	-	-	IMPACT=MODIFIER;STRAND=-1;SYMBOL=XPO1;SYMBOL_SOURCE=HGNC;HGNC_ID=12825;NEAREST=XPO1;INTRON=4/24
rs7563678	2:61741811	C	ENSG00000082898	ENST00000404992	Transcript	intron_variant	-	-	-	-	-	-	IMPACT=MODIFIER;STRAND=-1;SYMBOL=XPO1;SYMBOL_SOURCE=HGNC;HGNC_ID=12825;NEAREST=XPO1;INTRON=4/24
rs7563678	2:61741811	C	ENSG00000082898	ENST00000406957	Transcript	intron_variant	-	-	-	-	-	-	IMPACT=MODIFIER;STRAND=-1;SYMBOL=XPO1;SYMBOL_SOURCE=HGNC;HGNC_ID=12825;NEAREST=XPO1;INTRON=5/25
rs7563678	2:61741811	C	ENSG00000082898	ENST00000428210	Transcript	intron_variant,NMD_transcript_variant	-	-	-	-	-	-	IMPACT=MODIFIER;STRAND=-1;SYMBOL=XPO1;SYMBOL_SOURCE=HGNC;HGNC_ID=12825;NEAREST=XPO1;INTRON=5/23
rs7563678	2:61741811	C	ENSG00000082898	ENST00000437159	Transcript	intron_variant,NMD_transcript_variant	-	-	-	-	-	-	IMPACT=MODIFIER;STRAND=-1;FLAGS=cds_start_NF;SYMBOL=XPO1;SYMBOL_SOURCE=HGNC;HGNC_ID=12825;NEAREST=XPO1;INTRON=2/5
rs7563678	2:61741811	C	ENSG00000082898	ENST00000443240	Transcript	intron_variant	-	-	-	-	-	-	IMPACT=MODIFIER;STRAND=-1;FLAGS=cds_end_NF;SYMBOL=XPO1;SYMBOL_SOURCE=HGNC;HGNC_ID=12825;NEAREST=XPO1;INTRON=5/6
rs7563678	2:61741811	C	ENSG00000082898	ENST00000451765	Transcript	intron_variant	-	-	-	-	-	-	IMPACT=MODIFIER;STRAND=-1;FLAGS=cds_end_NF;SYMBOL=XPO1;SYMBOL_SOURCE=HGNC;HGNC_ID=12825;NEAREST=XPO1;INTRON=4/6
rs7563678	2:61741811	C	ENSG00000082898	ENST00000468259	Transcript	intron_variant,non_coding_transcript_variant	-	-	-	-	-	-	IMPACT=MODIFIER;STRAND=-1;SYMBOL=XPO1;SYMBOL_SOURCE=HGNC;HGNC_ID=12825;NEAREST=XPO1;INTRON=2/2
rs7563678	2:61741811	C	ENSG00000082898	ENST00000476585	Transcript	intron_variant,non_coding_transcript_variant	-	-	-	-	-	-	IMPACT=MODIFIER;STRAND=-1;SYMBOL=XPO1;SYMBOL_SOURCE=HGNC;HGNC_ID=12825;NEAREST=XPO1;INTRON=2/2
rs6545877	2:61741947	C	ENSG00000082898	ENST00000401558	Transcript	intron_variant	-	-	-	-	-	-	IMPACT=MODIFIER;STRAND=-1;SYMBOL=XPO1;SYMBOL_SOURCE=HGNC;HGNC_ID=12825;NEAREST=XPO1;INTRON=4/24
rs6545877	2:61741947	C	ENSG00000082898	ENST00000404992	Transcript	intron_variant	-	-	-	-	-	-	IMPACT=MODIFIER;STRAND=-1;SYMBOL=XPO1;SYMBOL_SOURCE=HGNC;HGNC_ID=12825;NEAREST=XPO1;INTRON=4/24
rs6545877	2:61741947	C	ENSG00000082898	ENST00000406957	Transcript	intron_variant	-	-	-	-	-	-	IMPACT=MODIFIER;STRAND=-1;SYMBOL=XPO1;SYMBOL_SOURCE=HGNC;HGNC_ID=12825;NEAREST=XPO1;INTRON=5/25
rs6545877	2:61741947	C	ENSG00000082898	ENST00000428210	Transcript	intron_variant,NMD_transcript_variant	-	-	-	-	-	-	IMPACT=MODIFIER;STRAND=-1;SYMBOL=XPO1;SYMBOL_SOURCE=HGNC;HGNC_ID=12825;NEAREST=XPO1;INTRON=5/23
rs6545877	2:61741947	C	ENSG00000082898	ENST00000437159	Transcript	intron_variant,NMD_transcript_variant	-	-	-	-	-	-	IMPACT=MODIFIER;STRAND=-1;FLAGS=cds_start_NF;SYMBOL=XPO1;SYMBOL_SOURCE=HGNC;HGNC_ID=12825;NEAREST=XPO1;INTRON=2/5
rs6545877	2:61741947	C	ENSG00000082898	ENST00000443240	Transcript	intron_variant	-	-	-	-	-	-	IMPACT=MODIFIER;STRAND=-1;FLAGS=cds_end_NF;SYMBOL=XPO1;SYMBOL_SOURCE=HGNC;HGNC_ID=12825;NEAREST=XPO1;INTRON=5/6
rs6545877	2:61741947	C	ENSG00000082898	ENST00000451765	Transcript	intron_variant	-	-	-	-	-	-	IMPACT=MODIFIER;STRAND=-1;FLAGS=cds_end_NF;SYMBOL=XPO1;SYMBOL_SOURCE=HGNC;HGNC_ID=12825;NEAREST=XPO1;INTRON=4/6
rs6545877	2:61741947	C	ENSG00000082898	ENST00000468259	Transcript	intron_variant,non_coding_transcript_variant	-	-	-	-	-	-	IMPACT=MODIFIER;STRAND=-1;SYMBOL=XPO1;SYMBOL_SOURCE=HGNC;HGNC_ID=12825;NEAREST=XPO1;INTRON=2/2
rs6545877	2:61741947	C	ENSG00000082898	ENST00000476585	Transcript	intron_variant,non_coding_transcript_variant	-	-	-	-	-	-	IMPACT=MODIFIER;STRAND=-1;SYMBOL=XPO1;SYMBOL_SOURCE=HGNC;HGNC_ID=12825;NEAREST=XPO1;INTRON=2/2
rs7606167	2:61742654	G	ENSG00000082898	ENST00000401558	Transcript	intron_variant	-	-	-	-	-	-	IMPACT=MODIFIER;STRAND=-1;SYMBOL=XPO1;SYMBOL_SOURCE=HGNC;HGNC_ID=12825;NEAREST=XPO1;INTRON=4/24
rs7606167	2:61742654	G	ENSG00000082898	ENST00000404992	Transcript	intron_variant	-	-	-	-	-	-	IMPACT=MODIFIER;STRAND=-1;SYMBOL=XPO1;SYMBOL_SOURCE=HGNC;HGNC_ID=12825;NEAREST=XPO1;INTRON=4/24
rs7606167	2:61742654	G	ENSG00000082898	ENST00000406957	Transcript	intron_variant	-	-	-	-	-	-	IMPACT=MODIFIER;STRAND=-1;SYMBOL=XPO1;SYMBOL_SOURCE=HGNC;HGNC_ID=12825;NEAREST=XPO1;INTRON=5/25
rs7606167	2:61742654	G	ENSG00000082898	ENST00000428210	Transcript	intron_variant,NMD_transcript_variant	-	-	-	-	-	-	IMPACT=MODIFIER;STRAND=-1;SYMBOL=XPO1;SYMBOL_SOURCE=HGNC;HGNC_ID=12825;NEAREST=XPO1;INTRON=5/23
rs7606167	2:61742654	G	ENSG00000082898	ENST00000437159	Transcript	intron_variant,NMD_transcript_variant	-	-	-	-	-	-	IMPACT=MODIFIER;STRAND=-1;FLAGS=cds_start_NF;SYMBOL=XPO1;SYMBOL_SOURCE=HGNC;HGNC_ID=12825;NEAREST=XPO1;INTRON=2/5
rs7606167	2:61742654	G	ENSG00000082898	ENST00000443240	Transcript	intron_variant	-	-	-	-	-	-	IMPACT=MODIFIER;STRAND=-1;FLAGS=cds_end_NF;SYMBOL=XPO1;SYMBOL_SOURCE=HGNC;HGNC_ID=12825;NEAREST=XPO1;INTRON=5/6
rs7606167	2:61742654	G	ENSG00000082898	ENST00000451765	Transcript	intron_variant	-	-	-	-	-	-	IMPACT=MODIFIER;STRAND=-1;FLAGS=cds_end_NF;SYMBOL=XPO1;SYMBOL_SOURCE=HGNC;HGNC_ID=12825;NEAREST=XPO1;INTRON=4/6
rs7606167	2:61742654	G	ENSG00000082898	ENST00000468259	Transcript	intron_variant,non_coding_transcript_variant	-	-	-	-	-	-	IMPACT=MODIFIER;STRAND=-1;SYMBOL=XPO1;SYMBOL_SOURCE=HGNC;HGNC_ID=12825;NEAREST=XPO1;INTRON=2/2
rs7606167	2:61742654	G	ENSG00000082898	ENST00000476585	Transcript	intron_variant,non_coding_transcript_variant	-	-	-	-	-	-	IMPACT=MODIFIER;STRAND=-1;SYMBOL=XPO1;SYMBOL_SOURCE=HGNC;HGNC_ID=12825;NEAREST=XPO1;INTRON=2/2
rs11678419	2:61743377	T	ENSG00000082898	ENST00000401558	Transcript	intron_variant	-	-	-	-	-	-	IMPACT=MODIFIER;STRAND=-1;SYMBOL=XPO1;SYMBOL_SOURCE=HGNC;HGNC_ID=12825;NEAREST=XPO1;INTRON=4/24
rs11678419	2:61743377	T	ENSG00000082898	ENST00000404992	Transcript	intron_variant	-	-	-	-	-	-	IMPACT=MODIFIER;STRAND=-1;SYMBOL=XPO1;SYMBOL_SOURCE=HGNC;HGNC_ID=12825;NEAREST=XPO1;INTRON=4/24
rs11678419	2:61743377	T	ENSG00000082898	ENST00000406957	Transcript	intron_variant	-	-	-	-	-	-	IMPACT=MODIFIER;STRAND=-1;SYMBOL=XPO1;SYMBOL_SOURCE=HGNC;HGNC_ID=12825;NEAREST=XPO1;INTRON=5/25
rs11678419	2:61743377	T	ENSG00000082898	ENST00000428210	Transcript	intron_variant,NMD_transcript_variant	-	-	-	-	-	-	IMPACT=MODIFIER;STRAND=-1;SYMBOL=XPO1;SYMBOL_SOURCE=HGNC;HGNC_ID=12825;NEAREST=XPO1;INTRON=5/23
rs11678419	2:61743377	T	ENSG00000082898	ENST00000437159	Transcript	intron_variant,NMD_transcript_variant	-	-	-	-	-	-	IMPACT=MODIFIER;STRAND=-1;FLAGS=cds_start_NF;SYMBOL=XPO1;SYMBOL_SOURCE=HGNC;HGNC_ID=12825;NEAREST=XPO1;INTRON=2/5
rs11678419	2:61743377	T	ENSG00000082898	ENST00000443240	Transcript	intron_variant	-	-	-	-	-	-	IMPACT=MODIFIER;STRAND=-1;FLAGS=cds_end_NF;SYMBOL=XPO1;SYMBOL_SOURCE=HGNC;HGNC_ID=12825;NEAREST=XPO1;INTRON=5/6
rs11678419	2:61743377	T	ENSG00000082898	ENST00000451765	Transcript	intron_variant	-	-	-	-	-	-	IMPACT=MODIFIER;STRAND=-1;FLAGS=cds_end_NF;SYMBOL=XPO1;SYMBOL_SOURCE=HGNC;HGNC_ID=12825;NEAREST=XPO1;INTRON=4/6
rs11678419	2:61743377	T	ENSG00000082898	ENST00000468259	Transcript	intron_variant,non_coding_transcript_variant	-	-	-	-	-	-	IMPACT=MODIFIER;STRAND=-1;SYMBOL=XPO1;SYMBOL_SOURCE=HGNC;HGNC_ID=12825;NEAREST=XPO1;INTRON=2/2
rs11678419	2:61743377	T	ENSG00000082898	ENST00000476585	Transcript	intron_variant,non_coding_transcript_variant	-	-	-	-	-	-	IMPACT=MODIFIER;STRAND=-1;SYMBOL=XPO1;SYMBOL_SOURCE=HGNC;HGNC_ID=12825;NEAREST=XPO1;INTRON=2/2
rs13413337	2:61747123	G	ENSG00000082898	ENST00000401558	Transcript	intron_variant	-	-	-	-	-	-	IMPACT=MODIFIER;STRAND=-1;SYMBOL=XPO1;SYMBOL_SOURCE=HGNC;HGNC_ID=12825;NEAREST=XPO1;INTRON=4/24
rs13413337	2:61747123	G	ENSG00000082898	ENST00000404992	Transcript	intron_variant	-	-	-	-	-	-	IMPACT=MODIFIER;STRAND=-1;SYMBOL=XPO1;SYMBOL_SOURCE=HGNC;HGNC_ID=12825;NEAREST=XPO1;INTRON=4/24
rs13413337	2:61747123	G	ENSG00000082898	ENST00000406957	Transcript	intron_variant	-	-	-	-	-	-	IMPACT=MODIFIER;STRAND=-1;SYMBOL=XPO1;SYMBOL_SOURCE=HGNC;HGNC_ID=12825;NEAREST=XPO1;INTRON=5/25
rs13413337	2:61747123	G	ENSG00000082898	ENST00000420673	Transcript	downstream_gene_variant	-	-	-	-	-	-	IMPACT=MODIFIER;DISTANCE=2623;STRAND=-1;FLAGS=cds_end_NF;SYMBOL=XPO1;SYMBOL_SOURCE=HGNC;HGNC_ID=12825;NEAREST=XPO1
rs13413337	2:61747123	G	ENSG00000082898	ENST00000422552	Transcript	downstream_gene_variant	-	-	-	-	-	-	IMPACT=MODIFIER;DISTANCE=2638;STRAND=-1;FLAGS=cds_end_NF;SYMBOL=XPO1;SYMBOL_SOURCE=HGNC;HGNC_ID=12825;NEAREST=XPO1
rs13413337	2:61747123	G	ENSG00000082898	ENST00000428210	Transcript	intron_variant,NMD_transcript_variant	-	-	-	-	-	-	IMPACT=MODIFIER;STRAND=-1;SYMBOL=XPO1;SYMBOL_SOURCE=HGNC;HGNC_ID=12825;NEAREST=XPO1;INTRON=5/23
rs13413337	2:61747123	G	ENSG00000082898	ENST00000437159	Transcript	intron_variant,NMD_transcript_variant	-	-	-	-	-	-	IMPACT=MODIFIER;STRAND=-1;FLAGS=cds_start_NF;SYMBOL=XPO1;SYMBOL_SOURCE=HGNC;HGNC_ID=12825;NEAREST=XPO1;INTRON=2/5
rs13413337	2:61747123	G	ENSG00000082898	ENST00000443240	Transcript	intron_variant	-	-	-	-	-	-	IMPACT=MODIFIER;STRAND=-1;FLAGS=cds_end_NF;SYMBOL=XPO1;SYMBOL_SOURCE=HGNC;HGNC_ID=12825;NEAREST=XPO1;INTRON=5/6
rs13413337	2:61747123	G	ENSG00000082898	ENST00000451765	Transcript	intron_variant	-	-	-	-	-	-	IMPACT=MODIFIER;STRAND=-1;FLAGS=cds_end_NF;SYMBOL=XPO1;SYMBOL_SOURCE=HGNC;HGNC_ID=12825;NEAREST=XPO1;INTRON=4/6
rs13413337	2:61747123	G	ENSG00000082898	ENST00000457483	Transcript	downstream_gene_variant	-	-	-	-	-	-	IMPACT=MODIFIER;DISTANCE=2642;STRAND=-1;FLAGS=cds_end_NF;SYMBOL=XPO1;SYMBOL_SOURCE=HGNC;HGNC_ID=12825;NEAREST=XPO1
rs13413337	2:61747123	G	ENSG00000082898	ENST00000468259	Transcript	intron_variant,non_coding_transcript_variant	-	-	-	-	-	-	IMPACT=MODIFIER;STRAND=-1;SYMBOL=XPO1;SYMBOL_SOURCE=HGNC;HGNC_ID=12825;NEAREST=XPO1;INTRON=2/2
rs13413337	2:61747123	G	ENSG00000082898	ENST00000476585	Transcript	intron_variant,non_coding_transcript_variant	-	-	-	-	-	-	IMPACT=MODIFIER;STRAND=-1;SYMBOL=XPO1;SYMBOL_SOURCE=HGNC;HGNC_ID=12825;NEAREST=XPO1;INTRON=2/2
rs12612982	2:61747355	A	ENSG00000082898	ENST00000401558	Transcript	intron_variant	-	-	-	-	-	-	IMPACT=MODIFIER;STRAND=-1;SYMBOL=XPO1;SYMBOL_SOURCE=HGNC;HGNC_ID=12825;NEAREST=XPO1;INTRON=4/24
rs12612982	2:61747355	A	ENSG00000082898	ENST00000404992	Transcript	intron_variant	-	-	-	-	-	-	IMPACT=MODIFIER;STRAND=-1;SYMBOL=XPO1;SYMBOL_SOURCE=HGNC;HGNC_ID=12825;NEAREST=XPO1;INTRON=4/24
rs12612982	2:61747355	A	ENSG00000082898	ENST00000406957	Transcript	intron_variant	-	-	-	-	-	-	IMPACT=MODIFIER;STRAND=-1;SYMBOL=XPO1;SYMBOL_SOURCE=HGNC;HGNC_ID=12825;NEAREST=XPO1;INTRON=5/25
rs12612982	2:61747355	A	ENSG00000082898	ENST00000420673	Transcript	downstream_gene_variant	-	-	-	-	-	-	IMPACT=MODIFIER;DISTANCE=2391;STRAND=-1;FLAGS=cds_end_NF;SYMBOL=XPO1;SYMBOL_SOURCE=HGNC;HGNC_ID=12825;NEAREST=XPO1
rs12612982	2:61747355	A	ENSG00000082898	ENST00000422552	Transcript	downstream_gene_variant	-	-	-	-	-	-	IMPACT=MODIFIER;DISTANCE=2406;STRAND=-1;FLAGS=cds_end_NF;SYMBOL=XPO1;SYMBOL_SOURCE=HGNC;HGNC_ID=12825;NEAREST=XPO1
rs12612982	2:61747355	A	ENSG00000082898	ENST00000428210	Transcript	intron_variant,NMD_transcript_variant	-	-	-	-	-	-	IMPACT=MODIFIER;STRAND=-1;SYMBOL=XPO1;SYMBOL_SOURCE=HGNC;HGNC_ID=12825;NEAREST=XPO1;INTRON=5/23
rs12612982	2:61747355	A	ENSG00000082898	ENST00000437159	Transcript	intron_variant,NMD_transcript_variant	-	-	-	-	-	-	IMPACT=MODIFIER;STRAND=-1;FLAGS=cds_start_NF;SYMBOL=XPO1;SYMBOL_SOURCE=HGNC;HGNC_ID=12825;NEAREST=XPO1;INTRON=2/5
rs12612982	2:61747355	A	ENSG00000082898	ENST00000443240	Transcript	intron_variant	-	-	-	-	-	-	IMPACT=MODIFIER;STRAND=-1;FLAGS=cds_end_NF;SYMBOL=XPO1;SYMBOL_SOURCE=HGNC;HGNC_ID=12825;NEAREST=XPO1;INTRON=5/6
rs12612982	2:61747355	A	ENSG00000082898	ENST00000451765	Transcript	intron_variant	-	-	-	-	-	-	IMPACT=MODIFIER;STRAND=-1;FLAGS=cds_end_NF;SYMBOL=XPO1;SYMBOL_SOURCE=HGNC;HGNC_ID=12825;NEAREST=XPO1;INTRON=4/6
rs12612982	2:61747355	A	ENSG00000082898	ENST00000457483	Transcript	downstream_gene_variant	-	-	-	-	-	-	IMPACT=MODIFIER;DISTANCE=2410;STRAND=-1;FLAGS=cds_end_NF;SYMBOL=XPO1;SYMBOL_SOURCE=HGNC;HGNC_ID=12825;NEAREST=XPO1
rs12612982	2:61747355	A	ENSG00000082898	ENST00000468259	Transcript	intron_variant,non_coding_transcript_variant	-	-	-	-	-	-	IMPACT=MODIFIER;STRAND=-1;SYMBOL=XPO1;SYMBOL_SOURCE=HGNC;HGNC_ID=12825;NEAREST=XPO1;INTRON=2/2
rs12612982	2:61747355	A	ENSG00000082898	ENST00000476585	Transcript	intron_variant,non_coding_transcript_variant	-	-	-	-	-	-	IMPACT=MODIFIER;STRAND=-1;SYMBOL=XPO1;SYMBOL_SOURCE=HGNC;HGNC_ID=12825;NEAREST=XPO1;INTRON=2/2
rs10173974	2:61748900	G	ENSG00000082898	ENST00000401558	Transcript	intron_variant	-	-	-	-	-	-	IMPACT=MODIFIER;STRAND=-1;SYMBOL=XPO1;SYMBOL_SOURCE=HGNC;HGNC_ID=12825;NEAREST=XPO1;INTRON=4/24
rs10173974	2:61748900	G	ENSG00000082898	ENST00000404992	Transcript	intron_variant	-	-	-	-	-	-	IMPACT=MODIFIER;STRAND=-1;SYMBOL=XPO1;SYMBOL_SOURCE=HGNC;HGNC_ID=12825;NEAREST=XPO1;INTRON=4/24
rs10173974	2:61748900	G	ENSG00000082898	ENST00000406957	Transcript	intron_variant	-	-	-	-	-	-	IMPACT=MODIFIER;STRAND=-1;SYMBOL=XPO1;SYMBOL_SOURCE=HGNC;HGNC_ID=12825;NEAREST=XPO1;INTRON=5/25
rs10173974	2:61748900	G	ENSG00000082898	ENST00000420673	Transcript	downstream_gene_variant	-	-	-	-	-	-	IMPACT=MODIFIER;DISTANCE=846;STRAND=-1;FLAGS=cds_end_NF;SYMBOL=XPO1;SYMBOL_SOURCE=HGNC;HGNC_ID=12825;NEAREST=XPO1
rs10173974	2:61748900	G	ENSG00000082898	ENST00000422552	Transcript	downstream_gene_variant	-	-	-	-	-	-	IMPACT=MODIFIER;DISTANCE=861;STRAND=-1;FLAGS=cds_end_NF;SYMBOL=XPO1;SYMBOL_SOURCE=HGNC;HGNC_ID=12825;NEAREST=XPO1
rs10173974	2:61748900	G	ENSG00000082898	ENST00000428210	Transcript	intron_variant,NMD_transcript_variant	-	-	-	-	-	-	IMPACT=MODIFIER;STRAND=-1;SYMBOL=XPO1;SYMBOL_SOURCE=HGNC;HGNC_ID=12825;NEAREST=XPO1;INTRON=5/23
rs10173974	2:61748900	G	ENSG00000082898	ENST00000436018	Transcript	downstream_gene_variant	-	-	-	-	-	-	IMPACT=MODIFIER;DISTANCE=4706;STRAND=-1;FLAGS=cds_end_NF;SYMBOL=XPO1;SYMBOL_SOURCE=HGNC;HGNC_ID=12825;NEAREST=XPO1
rs10173974	2:61748900	G	ENSG00000082898	ENST00000437159	Transcript	intron_variant,NMD_transcript_variant	-	-	-	-	-	-	IMPACT=MODIFIER;STRAND=-1;FLAGS=cds_start_NF;SYMBOL=XPO1;SYMBOL_SOURCE=HGNC;HGNC_ID=12825;NEAREST=XPO1;INTRON=2/5
rs10173974	2:61748900	G	ENSG00000082898	ENST00000443240	Transcript	intron_variant	-	-	-	-	-	-	IMPACT=MODIFIER;STRAND=-1;FLAGS=cds_end_NF;SYMBOL=XPO1;SYMBOL_SOURCE=HGNC;HGNC_ID=12825;NEAREST=XPO1;INTRON=5/6
rs10173974	2:61748900	G	ENSG00000082898	ENST00000449444	Transcript	downstream_gene_variant	-	-	-	-	-	-	IMPACT=MODIFIER;DISTANCE=4697;STRAND=-1;FLAGS=cds_end_NF;SYMBOL=XPO1;SYMBOL_SOURCE=HGNC;HGNC_ID=12825;NEAREST=XPO1
rs10173974	2:61748900	G	ENSG00000082898	ENST00000451765	Transcript	intron_variant	-	-	-	-	-	-	IMPACT=MODIFIER;STRAND=-1;FLAGS=cds_end_NF;SYMBOL=XPO1;SYMBOL_SOURCE=HGNC;HGNC_ID=12825;NEAREST=XPO1;INTRON=4/6
rs10173974	2:61748900	G	ENSG00000082898	ENST00000457483	Transcript	downstream_gene_variant	-	-	-	-	-	-	IMPACT=MODIFIER;DISTANCE=865;STRAND=-1;FLAGS=cds_end_NF;SYMBOL=XPO1;SYMBOL_SOURCE=HGNC;HGNC_ID=12825;NEAREST=XPO1
rs10173974	2:61748900	G	ENSG00000082898	ENST00000468259	Transcript	intron_variant,non_coding_transcript_variant	-	-	-	-	-	-	IMPACT=MODIFIER;STRAND=-1;SYMBOL=XPO1;SYMBOL_SOURCE=HGNC;HGNC_ID=12825;NEAREST=XPO1;INTRON=2/2
rs10173974	2:61748900	G	ENSG00000082898	ENST00000476585	Transcript	intron_variant,non_coding_transcript_variant	-	-	-	-	-	-	IMPACT=MODIFIER;STRAND=-1;SYMBOL=XPO1;SYMBOL_SOURCE=HGNC;HGNC_ID=12825;NEAREST=XPO1;INTRON=2/2
rs10173974	2:61748900	G	ENSG00000082898	ENST00000481214	Transcript	downstream_gene_variant	-	-	-	-	-	-	IMPACT=MODIFIER;DISTANCE=4302;STRAND=-1;SYMBOL=XPO1;SYMBOL_SOURCE=HGNC;HGNC_ID=12825;NEAREST=XPO1
rs10173974	2:61748900	G	ENSG00000082898	ENST00000495003	Transcript	downstream_gene_variant	-	-	-	-	-	-	IMPACT=MODIFIER;DISTANCE=4386;STRAND=-1;SYMBOL=XPO1;SYMBOL_SOURCE=HGNC;HGNC_ID=12825;NEAREST=XPO1
rs6707830	2:61749472	A	ENSG00000082898	ENST00000401558	Transcript	intron_variant	-	-	-	-	-	-	IMPACT=MODIFIER;STRAND=-1;SYMBOL=XPO1;SYMBOL_SOURCE=HGNC;HGNC_ID=12825;NEAREST=XPO1;INTRON=4/24
rs6707830	2:61749472	A	ENSG00000082898	ENST00000404992	Transcript	intron_variant	-	-	-	-	-	-	IMPACT=MODIFIER;STRAND=-1;SYMBOL=XPO1;SYMBOL_SOURCE=HGNC;HGNC_ID=12825;NEAREST=XPO1;INTRON=4/24
rs6707830	2:61749472	A	ENSG00000082898	ENST00000406957	Transcript	intron_variant	-	-	-	-	-	-	IMPACT=MODIFIER;STRAND=-1;SYMBOL=XPO1;SYMBOL_SOURCE=HGNC;HGNC_ID=12825;NEAREST=XPO1;INTRON=5/25
rs6707830	2:61749472	A	ENSG00000082898	ENST00000420673	Transcript	downstream_gene_variant	-	-	-	-	-	-	IMPACT=MODIFIER;DISTANCE=274;STRAND=-1;FLAGS=cds_end_NF;SYMBOL=XPO1;SYMBOL_SOURCE=HGNC;HGNC_ID=12825;NEAREST=XPO1
rs6707830	2:61749472	A	ENSG00000082898	ENST00000422552	Transcript	downstream_gene_variant	-	-	-	-	-	-	IMPACT=MODIFIER;DISTANCE=289;STRAND=-1;FLAGS=cds_end_NF;SYMBOL=XPO1;SYMBOL_SOURCE=HGNC;HGNC_ID=12825;NEAREST=XPO1
rs6707830	2:61749472	A	ENSG00000082898	ENST00000428210	Transcript	intron_variant,NMD_transcript_variant	-	-	-	-	-	-	IMPACT=MODIFIER;STRAND=-1;SYMBOL=XPO1;SYMBOL_SOURCE=HGNC;HGNC_ID=12825;NEAREST=XPO1;INTRON=5/23
rs6707830	2:61749472	A	ENSG00000082898	ENST00000436018	Transcript	downstream_gene_variant	-	-	-	-	-	-	IMPACT=MODIFIER;DISTANCE=4134;STRAND=-1;FLAGS=cds_end_NF;SYMBOL=XPO1;SYMBOL_SOURCE=HGNC;HGNC_ID=12825;NEAREST=XPO1
rs6707830	2:61749472	A	ENSG00000082898	ENST00000437159	Transcript	intron_variant,NMD_transcript_variant	-	-	-	-	-	-	IMPACT=MODIFIER;STRAND=-1;FLAGS=cds_start_NF;SYMBOL=XPO1;SYMBOL_SOURCE=HGNC;HGNC_ID=12825;NEAREST=XPO1;INTRON=2/5
rs6707830	2:61749472	A	ENSG00000082898	ENST00000443240	Transcript	intron_variant	-	-	-	-	-	-	IMPACT=MODIFIER;STRAND=-1;FLAGS=cds_end_NF;SYMBOL=XPO1;SYMBOL_SOURCE=HGNC;HGNC_ID=12825;NEAREST=XPO1;INTRON=5/6
rs6707830	2:61749472	A	ENSG00000082898	ENST00000449444	Transcript	downstream_gene_variant	-	-	-	-	-	-	IMPACT=MODIFIER;DISTANCE=4125;STRAND=-1;FLAGS=cds_end_NF;SYMBOL=XPO1;SYMBOL_SOURCE=HGNC;HGNC_ID=12825;NEAREST=XPO1
rs6707830	2:61749472	A	ENSG00000082898	ENST00000451765	Transcript	intron_variant	-	-	-	-	-	-	IMPACT=MODIFIER;STRAND=-1;FLAGS=cds_end_NF;SYMBOL=XPO1;SYMBOL_SOURCE=HGNC;HGNC_ID=12825;NEAREST=XPO1;INTRON=4/6
rs6707830	2:61749472	A	ENSG00000082898	ENST00000457483	Transcript	downstream_gene_variant	-	-	-	-	-	-	IMPACT=MODIFIER;DISTANCE=293;STRAND=-1;FLAGS=cds_end_NF;SYMBOL=XPO1;SYMBOL_SOURCE=HGNC;HGNC_ID=12825;NEAREST=XPO1
rs6707830	2:61749472	A	ENSG00000082898	ENST00000468259	Transcript	intron_variant,non_coding_transcript_variant	-	-	-	-	-	-	IMPACT=MODIFIER;STRAND=-1;SYMBOL=XPO1;SYMBOL_SOURCE=HGNC;HGNC_ID=12825;NEAREST=XPO1;INTRON=2/2
rs6707830	2:61749472	A	ENSG00000082898	ENST00000476585	Transcript	intron_variant,non_coding_transcript_variant	-	-	-	-	-	-	IMPACT=MODIFIER;STRAND=-1;SYMBOL=XPO1;SYMBOL_SOURCE=HGNC;HGNC_ID=12825;NEAREST=XPO1;INTRON=2/2
rs6707830	2:61749472	A	ENSG00000082898	ENST00000481214	Transcript	downstream_gene_variant	-	-	-	-	-	-	IMPACT=MODIFIER;DISTANCE=3730;STRAND=-1;SYMBOL=XPO1;SYMBOL_SOURCE=HGNC;HGNC_ID=12825;NEAREST=XPO1
rs6707830	2:61749472	A	ENSG00000082898	ENST00000495003	Transcript	downstream_gene_variant	-	-	-	-	-	-	IMPACT=MODIFIER;DISTANCE=3814;STRAND=-1;SYMBOL=XPO1;SYMBOL_SOURCE=HGNC;HGNC_ID=12825;NEAREST=XPO1
rs3732171	2:61749690	T	ENSG00000082898	ENST00000401558	Transcript	intron_variant	-	-	-	-	-	-	IMPACT=MODIFIER;STRAND=-1;SYMBOL=XPO1;SYMBOL_SOURCE=HGNC;HGNC_ID=12825;NEAREST=XPO1;INTRON=4/24
rs3732171	2:61749690	T	ENSG00000082898	ENST00000404992	Transcript	intron_variant	-	-	-	-	-	-	IMPACT=MODIFIER;STRAND=-1;SYMBOL=XPO1;SYMBOL_SOURCE=HGNC;HGNC_ID=12825;NEAREST=XPO1;INTRON=4/24
rs3732171	2:61749690	T	ENSG00000082898	ENST00000406957	Transcript	intron_variant	-	-	-	-	-	-	IMPACT=MODIFIER;STRAND=-1;SYMBOL=XPO1;SYMBOL_SOURCE=HGNC;HGNC_ID=12825;NEAREST=XPO1;INTRON=5/25
rs3732171	2:61749690	T	ENSG00000082898	ENST00000420673	Transcript	downstream_gene_variant	-	-	-	-	-	-	IMPACT=MODIFIER;DISTANCE=56;STRAND=-1;FLAGS=cds_end_NF;SYMBOL=XPO1;SYMBOL_SOURCE=HGNC;HGNC_ID=12825;NEAREST=XPO1
rs3732171	2:61749690	T	ENSG00000082898	ENST00000422552	Transcript	downstream_gene_variant	-	-	-	-	-	-	IMPACT=MODIFIER;DISTANCE=71;STRAND=-1;FLAGS=cds_end_NF;SYMBOL=XPO1;SYMBOL_SOURCE=HGNC;HGNC_ID=12825;NEAREST=XPO1
rs3732171	2:61749690	T	ENSG00000082898	ENST00000428210	Transcript	intron_variant,NMD_transcript_variant	-	-	-	-	-	-	IMPACT=MODIFIER;STRAND=-1;SYMBOL=XPO1;SYMBOL_SOURCE=HGNC;HGNC_ID=12825;NEAREST=XPO1;INTRON=5/23
rs3732171	2:61749690	T	ENSG00000082898	ENST00000436018	Transcript	downstream_gene_variant	-	-	-	-	-	-	IMPACT=MODIFIER;DISTANCE=3916;STRAND=-1;FLAGS=cds_end_NF;SYMBOL=XPO1;SYMBOL_SOURCE=HGNC;HGNC_ID=12825;NEAREST=XPO1
rs3732171	2:61749690	T	ENSG00000082898	ENST00000437159	Transcript	intron_variant,NMD_transcript_variant	-	-	-	-	-	-	IMPACT=MODIFIER;STRAND=-1;FLAGS=cds_start_NF;SYMBOL=XPO1;SYMBOL_SOURCE=HGNC;HGNC_ID=12825;NEAREST=XPO1;INTRON=2/5
rs3732171	2:61749690	T	ENSG00000082898	ENST00000443240	Transcript	intron_variant	-	-	-	-	-	-	IMPACT=MODIFIER;STRAND=-1;FLAGS=cds_end_NF;SYMBOL=XPO1;SYMBOL_SOURCE=HGNC;HGNC_ID=12825;NEAREST=XPO1;INTRON=5/6
rs3732171	2:61749690	T	ENSG00000082898	ENST00000449444	Transcript	downstream_gene_variant	-	-	-	-	-	-	IMPACT=MODIFIER;DISTANCE=3907;STRAND=-1;FLAGS=cds_end_NF;SYMBOL=XPO1;SYMBOL_SOURCE=HGNC;HGNC_ID=12825;NEAREST=XPO1
rs3732171	2:61749690	T	ENSG00000082898	ENST00000451765	Transcript	intron_variant	-	-	-	-	-	-	IMPACT=MODIFIER;STRAND=-1;FLAGS=cds_end_NF;SYMBOL=XPO1;SYMBOL_SOURCE=HGNC;HGNC_ID=12825;NEAREST=XPO1;INTRON=4/6
rs3732171	2:61749690	T	ENSG00000082898	ENST00000457483	Transcript	downstream_gene_variant	-	-	-	-	-	-	IMPACT=MODIFIER;DISTANCE=75;STRAND=-1;FLAGS=cds_end_NF;SYMBOL=XPO1;SYMBOL_SOURCE=HGNC;HGNC_ID=12825;NEAREST=XPO1
rs3732171	2:61749690	T	ENSG00000082898	ENST00000468259	Transcript	intron_variant,non_coding_transcript_variant	-	-	-	-	-	-	IMPACT=MODIFIER;STRAND=-1;SYMBOL=XPO1;SYMBOL_SOURCE=HGNC;HGNC_ID=12825;NEAREST=XPO1;INTRON=2/2
rs3732171	2:61749690	T	ENSG00000082898	ENST00000476585	Transcript	intron_variant,non_coding_transcript_variant	-	-	-	-	-	-	IMPACT=MODIFIER;STRAND=-1;SYMBOL=XPO1;SYMBOL_SOURCE=HGNC;HGNC_ID=12825;NEAREST=XPO1;INTRON=2/2
rs3732171	2:61749690	T	ENSG00000082898	ENST00000481214	Transcript	downstream_gene_variant	-	-	-	-	-	-	IMPACT=MODIFIER;DISTANCE=3512;STRAND=-1;SYMBOL=XPO1;SYMBOL_SOURCE=HGNC;HGNC_ID=12825;NEAREST=XPO1
rs3732171	2:61749690	T	ENSG00000082898	ENST00000495003	Transcript	downstream_gene_variant	-	-	-	-	-	-	IMPACT=MODIFIER;DISTANCE=3596;STRAND=-1;SYMBOL=XPO1;SYMBOL_SOURCE=HGNC;HGNC_ID=12825;NEAREST=XPO1
rs3732170	2:61749716	T	ENSG00000082898	ENST00000401558	Transcript	intron_variant	-	-	-	-	-	-	IMPACT=MODIFIER;STRAND=-1;SYMBOL=XPO1;SYMBOL_SOURCE=HGNC;HGNC_ID=12825;NEAREST=XPO1;INTRON=4/24
rs3732170	2:61749716	T	ENSG00000082898	ENST00000404992	Transcript	intron_variant	-	-	-	-	-	-	IMPACT=MODIFIER;STRAND=-1;SYMBOL=XPO1;SYMBOL_SOURCE=HGNC;HGNC_ID=12825;NEAREST=XPO1;INTRON=4/24
rs3732170	2:61749716	T	ENSG00000082898	ENST00000406957	Transcript	intron_variant	-	-	-	-	-	-	IMPACT=MODIFIER;STRAND=-1;SYMBOL=XPO1;SYMBOL_SOURCE=HGNC;HGNC_ID=12825;NEAREST=XPO1;INTRON=5/25
rs3732170	2:61749716	T	ENSG00000082898	ENST00000420673	Transcript	downstream_gene_variant	-	-	-	-	-	-	IMPACT=MODIFIER;DISTANCE=30;STRAND=-1;FLAGS=cds_end_NF;SYMBOL=XPO1;SYMBOL_SOURCE=HGNC;HGNC_ID=12825;NEAREST=XPO1
rs3732170	2:61749716	T	ENSG00000082898	ENST00000422552	Transcript	downstream_gene_variant	-	-	-	-	-	-	IMPACT=MODIFIER;DISTANCE=45;STRAND=-1;FLAGS=cds_end_NF;SYMBOL=XPO1;SYMBOL_SOURCE=HGNC;HGNC_ID=12825;NEAREST=XPO1
rs3732170	2:61749716	T	ENSG00000082898	ENST00000428210	Transcript	intron_variant,NMD_transcript_variant	-	-	-	-	-	-	IMPACT=MODIFIER;STRAND=-1;SYMBOL=XPO1;SYMBOL_SOURCE=HGNC;HGNC_ID=12825;NEAREST=XPO1;INTRON=5/23
rs3732170	2:61749716	T	ENSG00000082898	ENST00000436018	Transcript	downstream_gene_variant	-	-	-	-	-	-	IMPACT=MODIFIER;DISTANCE=3890;STRAND=-1;FLAGS=cds_end_NF;SYMBOL=XPO1;SYMBOL_SOURCE=HGNC;HGNC_ID=12825;NEAREST=XPO1
rs3732170	2:61749716	T	ENSG00000082898	ENST00000437159	Transcript	intron_variant,NMD_transcript_variant	-	-	-	-	-	-	IMPACT=MODIFIER;STRAND=-1;FLAGS=cds_start_NF;SYMBOL=XPO1;SYMBOL_SOURCE=HGNC;HGNC_ID=12825;NEAREST=XPO1;INTRON=2/5
rs3732170	2:61749716	T	ENSG00000082898	ENST00000443240	Transcript	intron_variant	-	-	-	-	-	-	IMPACT=MODIFIER;STRAND=-1;FLAGS=cds_end_NF;SYMBOL=XPO1;SYMBOL_SOURCE=HGNC;HGNC_ID=12825;NEAREST=XPO1;INTRON=5/6
rs3732170	2:61749716	T	ENSG00000082898	ENST00000449444	Transcript	downstream_gene_variant	-	-	-	-	-	-	IMPACT=MODIFIER;DISTANCE=3881;STRAND=-1;FLAGS=cds_end_NF;SYMBOL=XPO1;SYMBOL_SOURCE=HGNC;HGNC_ID=12825;NEAREST=XPO1
rs3732170	2:61749716	T	ENSG00000082898	ENST00000451765	Transcript	intron_variant	-	-	-	-	-	-	IMPACT=MODIFIER;STRAND=-1;FLAGS=cds_end_NF;SYMBOL=XPO1;SYMBOL_SOURCE=HGNC;HGNC_ID=12825;NEAREST=XPO1;INTRON=4/6
rs3732170	2:61749716	T	ENSG00000082898	ENST00000457483	Transcript	downstream_gene_variant	-	-	-	-	-	-	IMPACT=MODIFIER;DISTANCE=49;STRAND=-1;FLAGS=cds_end_NF;SYMBOL=XPO1;SYMBOL_SOURCE=HGNC;HGNC_ID=12825;NEAREST=XPO1
rs3732170	2:61749716	T	ENSG00000082898	ENST00000468259	Transcript	intron_variant,non_coding_transcript_variant	-	-	-	-	-	-	IMPACT=MODIFIER;STRAND=-1;SYMBOL=XPO1;SYMBOL_SOURCE=HGNC;HGNC_ID=12825;NEAREST=XPO1;INTRON=2/2
rs3732170	2:61749716	T	ENSG00000082898	ENST00000476585	Transcript	intron_variant,non_coding_transcript_variant	-	-	-	-	-	-	IMPACT=MODIFIER;STRAND=-1;SYMBOL=XPO1;SYMBOL_SOURCE=HGNC;HGNC_ID=12825;NEAREST=XPO1;INTRON=2/2
rs3732170	2:61749716	T	ENSG00000082898	ENST00000481214	Transcript	downstream_gene_variant	-	-	-	-	-	-	IMPACT=MODIFIER;DISTANCE=3486;STRAND=-1;SYMBOL=XPO1;SYMBOL_SOURCE=HGNC;HGNC_ID=12825;NEAREST=XPO1
rs3732170	2:61749716	T	ENSG00000082898	ENST00000495003	Transcript	downstream_gene_variant	-	-	-	-	-	-	IMPACT=MODIFIER;DISTANCE=3570;STRAND=-1;SYMBOL=XPO1;SYMBOL_SOURCE=HGNC;HGNC_ID=12825;NEAREST=XPO1
rs1992765	2:61751333	G	ENSG00000082898	ENST00000401558	Transcript	intron_variant	-	-	-	-	-	-	IMPACT=MODIFIER;STRAND=-1;SYMBOL=XPO1;SYMBOL_SOURCE=HGNC;HGNC_ID=12825;NEAREST=XPO1;INTRON=3/24
rs1992765	2:61751333	G	ENSG00000082898	ENST00000404992	Transcript	intron_variant	-	-	-	-	-	-	IMPACT=MODIFIER;STRAND=-1;SYMBOL=XPO1;SYMBOL_SOURCE=HGNC;HGNC_ID=12825;NEAREST=XPO1;INTRON=3/24
rs1992765	2:61751333	G	ENSG00000082898	ENST00000406957	Transcript	intron_variant	-	-	-	-	-	-	IMPACT=MODIFIER;STRAND=-1;SYMBOL=XPO1;SYMBOL_SOURCE=HGNC;HGNC_ID=12825;NEAREST=XPO1;INTRON=4/25
rs1992765	2:61751333	G	ENSG00000082898	ENST00000420673	Transcript	intron_variant	-	-	-	-	-	-	IMPACT=MODIFIER;STRAND=-1;FLAGS=cds_end_NF;SYMBOL=XPO1;SYMBOL_SOURCE=HGNC;HGNC_ID=12825;NEAREST=XPO1;INTRON=2/2
rs1992765	2:61751333	G	ENSG00000082898	ENST00000422552	Transcript	intron_variant	-	-	-	-	-	-	IMPACT=MODIFIER;STRAND=-1;FLAGS=cds_end_NF;SYMBOL=XPO1;SYMBOL_SOURCE=HGNC;HGNC_ID=12825;NEAREST=XPO1;INTRON=3/3
rs1992765	2:61751333	G	ENSG00000082898	ENST00000428210	Transcript	intron_variant,NMD_transcript_variant	-	-	-	-	-	-	IMPACT=MODIFIER;STRAND=-1;SYMBOL=XPO1;SYMBOL_SOURCE=HGNC;HGNC_ID=12825;NEAREST=XPO1;INTRON=4/23
rs1992765	2:61751333	G	ENSG00000082898	ENST00000436018	Transcript	downstream_gene_variant	-	-	-	-	-	-	IMPACT=MODIFIER;DISTANCE=2273;STRAND=-1;FLAGS=cds_end_NF;SYMBOL=XPO1;SYMBOL_SOURCE=HGNC;HGNC_ID=12825;NEAREST=XPO1
rs1992765	2:61751333	G	ENSG00000082898	ENST00000437159	Transcript	intron_variant,NMD_transcript_variant	-	-	-	-	-	-	IMPACT=MODIFIER;STRAND=-1;FLAGS=cds_start_NF;SYMBOL=XPO1;SYMBOL_SOURCE=HGNC;HGNC_ID=12825;NEAREST=XPO1;INTRON=1/5
rs1992765	2:61751333	G	ENSG00000082898	ENST00000443240	Transcript	intron_variant	-	-	-	-	-	-	IMPACT=MODIFIER;STRAND=-1;FLAGS=cds_end_NF;SYMBOL=XPO1;SYMBOL_SOURCE=HGNC;HGNC_ID=12825;NEAREST=XPO1;INTRON=4/6
rs1992765	2:61751333	G	ENSG00000082898	ENST00000449444	Transcript	downstream_gene_variant	-	-	-	-	-	-	IMPACT=MODIFIER;DISTANCE=2264;STRAND=-1;FLAGS=cds_end_NF;SYMBOL=XPO1;SYMBOL_SOURCE=HGNC;HGNC_ID=12825;NEAREST=XPO1
rs1992765	2:61751333	G	ENSG00000082898	ENST00000451765	Transcript	intron_variant	-	-	-	-	-	-	IMPACT=MODIFIER;STRAND=-1;FLAGS=cds_end_NF;SYMBOL=XPO1;SYMBOL_SOURCE=HGNC;HGNC_ID=12825;NEAREST=XPO1;INTRON=3/6
rs1992765	2:61751333	G	ENSG00000082898	ENST00000457483	Transcript	intron_variant	-	-	-	-	-	-	IMPACT=MODIFIER;STRAND=-1;FLAGS=cds_end_NF;SYMBOL=XPO1;SYMBOL_SOURCE=HGNC;HGNC_ID=12825;NEAREST=XPO1;INTRON=4/4
rs1992765	2:61751333	G	ENSG00000082898	ENST00000468259	Transcript	intron_variant,non_coding_transcript_variant	-	-	-	-	-	-	IMPACT=MODIFIER;STRAND=-1;SYMBOL=XPO1;SYMBOL_SOURCE=HGNC;HGNC_ID=12825;NEAREST=XPO1;INTRON=1/2
rs1992765	2:61751333	G	ENSG00000082898	ENST00000476585	Transcript	intron_variant,non_coding_transcript_variant	-	-	-	-	-	-	IMPACT=MODIFIER;STRAND=-1;SYMBOL=XPO1;SYMBOL_SOURCE=HGNC;HGNC_ID=12825;NEAREST=XPO1;INTRON=1/2
rs1992765	2:61751333	G	ENSG00000082898	ENST00000481214	Transcript	downstream_gene_variant	-	-	-	-	-	-	IMPACT=MODIFIER;DISTANCE=1869;STRAND=-1;SYMBOL=XPO1;SYMBOL_SOURCE=HGNC;HGNC_ID=12825;NEAREST=XPO1
rs1992765	2:61751333	G	ENSG00000082898	ENST00000495003	Transcript	downstream_gene_variant	-	-	-	-	-	-	IMPACT=MODIFIER;DISTANCE=1953;STRAND=-1;SYMBOL=XPO1;SYMBOL_SOURCE=HGNC;HGNC_ID=12825;NEAREST=XPO1
rs12713439	2:61752154	A	ENSG00000082898	ENST00000401558	Transcript	intron_variant	-	-	-	-	-	-	IMPACT=MODIFIER;STRAND=-1;SYMBOL=XPO1;SYMBOL_SOURCE=HGNC;HGNC_ID=12825;NEAREST=XPO1;INTRON=3/24
rs12713439	2:61752154	A	ENSG00000082898	ENST00000404992	Transcript	intron_variant	-	-	-	-	-	-	IMPACT=MODIFIER;STRAND=-1;SYMBOL=XPO1;SYMBOL_SOURCE=HGNC;HGNC_ID=12825;NEAREST=XPO1;INTRON=3/24
rs12713439	2:61752154	A	ENSG00000082898	ENST00000406957	Transcript	intron_variant	-	-	-	-	-	-	IMPACT=MODIFIER;STRAND=-1;SYMBOL=XPO1;SYMBOL_SOURCE=HGNC;HGNC_ID=12825;NEAREST=XPO1;INTRON=4/25
rs12713439	2:61752154	A	ENSG00000082898	ENST00000420673	Transcript	intron_variant	-	-	-	-	-	-	IMPACT=MODIFIER;STRAND=-1;FLAGS=cds_end_NF;SYMBOL=XPO1;SYMBOL_SOURCE=HGNC;HGNC_ID=12825;NEAREST=XPO1;INTRON=2/2
rs12713439	2:61752154	A	ENSG00000082898	ENST00000422552	Transcript	intron_variant	-	-	-	-	-	-	IMPACT=MODIFIER;STRAND=-1;FLAGS=cds_end_NF;SYMBOL=XPO1;SYMBOL_SOURCE=HGNC;HGNC_ID=12825;NEAREST=XPO1;INTRON=3/3
rs12713439	2:61752154	A	ENSG00000082898	ENST00000428210	Transcript	intron_variant,NMD_transcript_variant	-	-	-	-	-	-	IMPACT=MODIFIER;STRAND=-1;SYMBOL=XPO1;SYMBOL_SOURCE=HGNC;HGNC_ID=12825;NEAREST=XPO1;INTRON=4/23
rs12713439	2:61752154	A	ENSG00000082898	ENST00000436018	Transcript	downstream_gene_variant	-	-	-	-	-	-	IMPACT=MODIFIER;DISTANCE=1452;STRAND=-1;FLAGS=cds_end_NF;SYMBOL=XPO1;SYMBOL_SOURCE=HGNC;HGNC_ID=12825;NEAREST=XPO1
rs12713439	2:61752154	A	ENSG00000082898	ENST00000437159	Transcript	intron_variant,NMD_transcript_variant	-	-	-	-	-	-	IMPACT=MODIFIER;STRAND=-1;FLAGS=cds_start_NF;SYMBOL=XPO1;SYMBOL_SOURCE=HGNC;HGNC_ID=12825;NEAREST=XPO1;INTRON=1/5
rs12713439	2:61752154	A	ENSG00000082898	ENST00000443240	Transcript	intron_variant	-	-	-	-	-	-	IMPACT=MODIFIER;STRAND=-1;FLAGS=cds_end_NF;SYMBOL=XPO1;SYMBOL_SOURCE=HGNC;HGNC_ID=12825;NEAREST=XPO1;INTRON=4/6
rs12713439	2:61752154	A	ENSG00000082898	ENST00000449444	Transcript	downstream_gene_variant	-	-	-	-	-	-	IMPACT=MODIFIER;DISTANCE=1443;STRAND=-1;FLAGS=cds_end_NF;SYMBOL=XPO1;SYMBOL_SOURCE=HGNC;HGNC_ID=12825;NEAREST=XPO1
rs12713439	2:61752154	A	ENSG00000082898	ENST00000451765	Transcript	intron_variant	-	-	-	-	-	-	IMPACT=MODIFIER;STRAND=-1;FLAGS=cds_end_NF;SYMBOL=XPO1;SYMBOL_SOURCE=HGNC;HGNC_ID=12825;NEAREST=XPO1;INTRON=3/6
rs12713439	2:61752154	A	ENSG00000082898	ENST00000457483	Transcript	intron_variant	-	-	-	-	-	-	IMPACT=MODIFIER;STRAND=-1;FLAGS=cds_end_NF;SYMBOL=XPO1;SYMBOL_SOURCE=HGNC;HGNC_ID=12825;NEAREST=XPO1;INTRON=4/4
rs12713439	2:61752154	A	ENSG00000082898	ENST00000468259	Transcript	intron_variant,non_coding_transcript_variant	-	-	-	-	-	-	IMPACT=MODIFIER;STRAND=-1;SYMBOL=XPO1;SYMBOL_SOURCE=HGNC;HGNC_ID=12825;NEAREST=XPO1;INTRON=1/2
rs12713439	2:61752154	A	ENSG00000082898	ENST00000476585	Transcript	intron_variant,non_coding_transcript_variant	-	-	-	-	-	-	IMPACT=MODIFIER;STRAND=-1;SYMBOL=XPO1;SYMBOL_SOURCE=HGNC;HGNC_ID=12825;NEAREST=XPO1;INTRON=1/2
rs12713439	2:61752154	A	ENSG00000082898	ENST00000481214	Transcript	downstream_gene_variant	-	-	-	-	-	-	IMPACT=MODIFIER;DISTANCE=1048;STRAND=-1;SYMBOL=XPO1;SYMBOL_SOURCE=HGNC;HGNC_ID=12825;NEAREST=XPO1
rs12713439	2:61752154	A	ENSG00000082898	ENST00000495003	Transcript	downstream_gene_variant	-	-	-	-	-	-	IMPACT=MODIFIER;DISTANCE=1132;STRAND=-1;SYMBOL=XPO1;SYMBOL_SOURCE=HGNC;HGNC_ID=12825;NEAREST=XPO1
rs7421663	2:61753786	T	ENSG00000082898	ENST00000401558	Transcript	intron_variant	-	-	-	-	-	-	IMPACT=MODIFIER;STRAND=-1;SYMBOL=XPO1;SYMBOL_SOURCE=HGNC;HGNC_ID=12825;NEAREST=XPO1;INTRON=2/24
rs7421663	2:61753786	T	ENSG00000082898	ENST00000404992	Transcript	intron_variant	-	-	-	-	-	-	IMPACT=MODIFIER;STRAND=-1;SYMBOL=XPO1;SYMBOL_SOURCE=HGNC;HGNC_ID=12825;NEAREST=XPO1;INTRON=2/24
rs7421663	2:61753786	T	ENSG00000082898	ENST00000406957	Transcript	intron_variant	-	-	-	-	-	-	IMPACT=MODIFIER;STRAND=-1;SYMBOL=XPO1;SYMBOL_SOURCE=HGNC;HGNC_ID=12825;NEAREST=XPO1;INTRON=3/25
rs7421663	2:61753786	T	ENSG00000082898	ENST00000420673	Transcript	intron_variant	-	-	-	-	-	-	IMPACT=MODIFIER;STRAND=-1;FLAGS=cds_end_NF;SYMBOL=XPO1;SYMBOL_SOURCE=HGNC;HGNC_ID=12825;NEAREST=XPO1;INTRON=1/2
rs7421663	2:61753786	T	ENSG00000082898	ENST00000422552	Transcript	intron_variant	-	-	-	-	-	-	IMPACT=MODIFIER;STRAND=-1;FLAGS=cds_end_NF;SYMBOL=XPO1;SYMBOL_SOURCE=HGNC;HGNC_ID=12825;NEAREST=XPO1;INTRON=2/3
rs7421663	2:61753786	T	ENSG00000082898	ENST00000428210	Transcript	intron_variant,NMD_transcript_variant	-	-	-	-	-	-	IMPACT=MODIFIER;STRAND=-1;SYMBOL=XPO1;SYMBOL_SOURCE=HGNC;HGNC_ID=12825;NEAREST=XPO1;INTRON=2/23
rs7421663	2:61753786	T	ENSG00000082898	ENST00000436018	Transcript	intron_variant	-	-	-	-	-	-	IMPACT=MODIFIER;STRAND=-1;FLAGS=cds_end_NF;SYMBOL=XPO1;SYMBOL_SOURCE=HGNC;HGNC_ID=12825;NEAREST=XPO1;INTRON=2/2
rs7421663	2:61753786	T	ENSG00000082898	ENST00000437159	Transcript	upstream_gene_variant	-	-	-	-	-	-	IMPACT=MODIFIER;DISTANCE=133;STRAND=-1;FLAGS=cds_start_NF;SYMBOL=XPO1;SYMBOL_SOURCE=HGNC;HGNC_ID=12825;NEAREST=XPO1
rs7421663	2:61753786	T	ENSG00000082898	ENST00000443240	Transcript	intron_variant	-	-	-	-	-	-	IMPACT=MODIFIER;STRAND=-1;FLAGS=cds_end_NF;SYMBOL=XPO1;SYMBOL_SOURCE=HGNC;HGNC_ID=12825;NEAREST=XPO1;INTRON=3/6
rs7421663	2:61753786	T	ENSG00000082898	ENST00000449444	Transcript	intron_variant	-	-	-	-	-	-	IMPACT=MODIFIER;STRAND=-1;FLAGS=cds_end_NF;SYMBOL=XPO1;SYMBOL_SOURCE=HGNC;HGNC_ID=12825;NEAREST=XPO1;INTRON=2/2
rs7421663	2:61753786	T	ENSG00000082898	ENST00000451765	Transcript	intron_variant	-	-	-	-	-	-	IMPACT=MODIFIER;STRAND=-1;FLAGS=cds_end_NF;SYMBOL=XPO1;SYMBOL_SOURCE=HGNC;HGNC_ID=12825;NEAREST=XPO1;INTRON=2/6
rs7421663	2:61753786	T	ENSG00000082898	ENST00000457483	Transcript	intron_variant	-	-	-	-	-	-	IMPACT=MODIFIER;STRAND=-1;FLAGS=cds_end_NF;SYMBOL=XPO1;SYMBOL_SOURCE=HGNC;HGNC_ID=12825;NEAREST=XPO1;INTRON=3/4
rs7421663	2:61753786	T	ENSG00000082898	ENST00000468259	Transcript	upstream_gene_variant	-	-	-	-	-	-	IMPACT=MODIFIER;DISTANCE=876;STRAND=-1;SYMBOL=XPO1;SYMBOL_SOURCE=HGNC;HGNC_ID=12825;NEAREST=XPO1
rs7421663	2:61753786	T	ENSG00000082898	ENST00000476585	Transcript	upstream_gene_variant	-	-	-	-	-	-	IMPACT=MODIFIER;DISTANCE=128;STRAND=-1;SYMBOL=XPO1;SYMBOL_SOURCE=HGNC;HGNC_ID=12825;NEAREST=XPO1
rs7421663	2:61753786	T	ENSG00000082898	ENST00000481214	Transcript	intron_variant,non_coding_transcript_variant	-	-	-	-	-	-	IMPACT=MODIFIER;STRAND=-1;SYMBOL=XPO1;SYMBOL_SOURCE=HGNC;HGNC_ID=12825;NEAREST=XPO1;INTRON=2/2
rs7421663	2:61753786	T	ENSG00000082898	ENST00000495003	Transcript	intron_variant,non_coding_transcript_variant	-	-	-	-	-	-	IMPACT=MODIFIER;STRAND=-1;SYMBOL=XPO1;SYMBOL_SOURCE=HGNC;HGNC_ID=12825;NEAREST=XPO1;INTRON=1/1
rs11125885	2:61755728	C	ENSG00000082898	ENST00000401558	Transcript	intron_variant	-	-	-	-	-	-	IMPACT=MODIFIER;STRAND=-1;SYMBOL=XPO1;SYMBOL_SOURCE=HGNC;HGNC_ID=12825;NEAREST=XPO1;INTRON=2/24
rs11125885	2:61755728	C	ENSG00000082898	ENST00000404992	Transcript	intron_variant	-	-	-	-	-	-	IMPACT=MODIFIER;STRAND=-1;SYMBOL=XPO1;SYMBOL_SOURCE=HGNC;HGNC_ID=12825;NEAREST=XPO1;INTRON=2/24
rs11125885	2:61755728	C	ENSG00000082898	ENST00000406957	Transcript	intron_variant	-	-	-	-	-	-	IMPACT=MODIFIER;STRAND=-1;SYMBOL=XPO1;SYMBOL_SOURCE=HGNC;HGNC_ID=12825;NEAREST=XPO1;INTRON=3/25
rs11125885	2:61755728	C	ENSG00000082898	ENST00000420673	Transcript	intron_variant	-	-	-	-	-	-	IMPACT=MODIFIER;STRAND=-1;FLAGS=cds_end_NF;SYMBOL=XPO1;SYMBOL_SOURCE=HGNC;HGNC_ID=12825;NEAREST=XPO1;INTRON=1/2
rs11125885	2:61755728	C	ENSG00000082898	ENST00000422552	Transcript	intron_variant	-	-	-	-	-	-	IMPACT=MODIFIER;STRAND=-1;FLAGS=cds_end_NF;SYMBOL=XPO1;SYMBOL_SOURCE=HGNC;HGNC_ID=12825;NEAREST=XPO1;INTRON=2/3
rs11125885	2:61755728	C	ENSG00000082898	ENST00000428210	Transcript	intron_variant,NMD_transcript_variant	-	-	-	-	-	-	IMPACT=MODIFIER;STRAND=-1;SYMBOL=XPO1;SYMBOL_SOURCE=HGNC;HGNC_ID=12825;NEAREST=XPO1;INTRON=2/23
rs11125885	2:61755728	C	ENSG00000082898	ENST00000436018	Transcript	intron_variant	-	-	-	-	-	-	IMPACT=MODIFIER;STRAND=-1;FLAGS=cds_end_NF;SYMBOL=XPO1;SYMBOL_SOURCE=HGNC;HGNC_ID=12825;NEAREST=XPO1;INTRON=2/2
rs11125885	2:61755728	C	ENSG00000082898	ENST00000437159	Transcript	upstream_gene_variant	-	-	-	-	-	-	IMPACT=MODIFIER;DISTANCE=2075;STRAND=-1;FLAGS=cds_start_NF;SYMBOL=XPO1;SYMBOL_SOURCE=HGNC;HGNC_ID=12825;NEAREST=XPO1
rs11125885	2:61755728	C	ENSG00000082898	ENST00000443240	Transcript	intron_variant	-	-	-	-	-	-	IMPACT=MODIFIER;STRAND=-1;FLAGS=cds_end_NF;SYMBOL=XPO1;SYMBOL_SOURCE=HGNC;HGNC_ID=12825;NEAREST=XPO1;INTRON=3/6
rs11125885	2:61755728	C	ENSG00000082898	ENST00000449444	Transcript	intron_variant	-	-	-	-	-	-	IMPACT=MODIFIER;STRAND=-1;FLAGS=cds_end_NF;SYMBOL=XPO1;SYMBOL_SOURCE=HGNC;HGNC_ID=12825;NEAREST=XPO1;INTRON=2/2
rs11125885	2:61755728	C	ENSG00000082898	ENST00000451765	Transcript	intron_variant	-	-	-	-	-	-	IMPACT=MODIFIER;STRAND=-1;FLAGS=cds_end_NF;SYMBOL=XPO1;SYMBOL_SOURCE=HGNC;HGNC_ID=12825;NEAREST=XPO1;INTRON=2/6
rs11125885	2:61755728	C	ENSG00000082898	ENST00000457483	Transcript	intron_variant	-	-	-	-	-	-	IMPACT=MODIFIER;STRAND=-1;FLAGS=cds_end_NF;SYMBOL=XPO1;SYMBOL_SOURCE=HGNC;HGNC_ID=12825;NEAREST=XPO1;INTRON=3/4
rs11125885	2:61755728	C	ENSG00000082898	ENST00000468259	Transcript	upstream_gene_variant	-	-	-	-	-	-	IMPACT=MODIFIER;DISTANCE=2818;STRAND=-1;SYMBOL=XPO1;SYMBOL_SOURCE=HGNC;HGNC_ID=12825;NEAREST=XPO1
rs11125885	2:61755728	C	ENSG00000082898	ENST00000476585	Transcript	upstream_gene_variant	-	-	-	-	-	-	IMPACT=MODIFIER;DISTANCE=2070;STRAND=-1;SYMBOL=XPO1;SYMBOL_SOURCE=HGNC;HGNC_ID=12825;NEAREST=XPO1
rs11125885	2:61755728	C	ENSG00000082898	ENST00000481214	Transcript	intron_variant,non_coding_transcript_variant	-	-	-	-	-	-	IMPACT=MODIFIER;STRAND=-1;SYMBOL=XPO1;SYMBOL_SOURCE=HGNC;HGNC_ID=12825;NEAREST=XPO1;INTRON=2/2
rs11125885	2:61755728	C	ENSG00000082898	ENST00000495003	Transcript	intron_variant,non_coding_transcript_variant	-	-	-	-	-	-	IMPACT=MODIFIER;STRAND=-1;SYMBOL=XPO1;SYMBOL_SOURCE=HGNC;HGNC_ID=12825;NEAREST=XPO1;INTRON=1/1
rs2084195	2:61756535	T	ENSG00000082898	ENST00000401558	Transcript	intron_variant	-	-	-	-	-	-	IMPACT=MODIFIER;STRAND=-1;SYMBOL=XPO1;SYMBOL_SOURCE=HGNC;HGNC_ID=12825;NEAREST=XPO1;INTRON=2/24
rs2084195	2:61756535	T	ENSG00000082898	ENST00000404992	Transcript	intron_variant	-	-	-	-	-	-	IMPACT=MODIFIER;STRAND=-1;SYMBOL=XPO1;SYMBOL_SOURCE=HGNC;HGNC_ID=12825;NEAREST=XPO1;INTRON=2/24
rs2084195	2:61756535	T	ENSG00000082898	ENST00000406957	Transcript	intron_variant	-	-	-	-	-	-	IMPACT=MODIFIER;STRAND=-1;SYMBOL=XPO1;SYMBOL_SOURCE=HGNC;HGNC_ID=12825;NEAREST=XPO1;INTRON=3/25
rs2084195	2:61756535	T	ENSG00000082898	ENST00000420673	Transcript	intron_variant	-	-	-	-	-	-	IMPACT=MODIFIER;STRAND=-1;FLAGS=cds_end_NF;SYMBOL=XPO1;SYMBOL_SOURCE=HGNC;HGNC_ID=12825;NEAREST=XPO1;INTRON=1/2
rs2084195	2:61756535	T	ENSG00000082898	ENST00000422552	Transcript	intron_variant	-	-	-	-	-	-	IMPACT=MODIFIER;STRAND=-1;FLAGS=cds_end_NF;SYMBOL=XPO1;SYMBOL_SOURCE=HGNC;HGNC_ID=12825;NEAREST=XPO1;INTRON=2/3
rs2084195	2:61756535	T	ENSG00000082898	ENST00000428210	Transcript	intron_variant,NMD_transcript_variant	-	-	-	-	-	-	IMPACT=MODIFIER;STRAND=-1;SYMBOL=XPO1;SYMBOL_SOURCE=HGNC;HGNC_ID=12825;NEAREST=XPO1;INTRON=2/23
rs2084195	2:61756535	T	ENSG00000082898	ENST00000436018	Transcript	intron_variant	-	-	-	-	-	-	IMPACT=MODIFIER;STRAND=-1;FLAGS=cds_end_NF;SYMBOL=XPO1;SYMBOL_SOURCE=HGNC;HGNC_ID=12825;NEAREST=XPO1;INTRON=2/2
rs2084195	2:61756535	T	ENSG00000082898	ENST00000437159	Transcript	upstream_gene_variant	-	-	-	-	-	-	IMPACT=MODIFIER;DISTANCE=2882;STRAND=-1;FLAGS=cds_start_NF;SYMBOL=XPO1;SYMBOL_SOURCE=HGNC;HGNC_ID=12825;NEAREST=XPO1
rs2084195	2:61756535	T	ENSG00000082898	ENST00000443240	Transcript	intron_variant	-	-	-	-	-	-	IMPACT=MODIFIER;STRAND=-1;FLAGS=cds_end_NF;SYMBOL=XPO1;SYMBOL_SOURCE=HGNC;HGNC_ID=12825;NEAREST=XPO1;INTRON=3/6
rs2084195	2:61756535	T	ENSG00000082898	ENST00000449444	Transcript	intron_variant	-	-	-	-	-	-	IMPACT=MODIFIER;STRAND=-1;FLAGS=cds_end_NF;SYMBOL=XPO1;SYMBOL_SOURCE=HGNC;HGNC_ID=12825;NEAREST=XPO1;INTRON=2/2
rs2084195	2:61756535	T	ENSG00000082898	ENST00000451765	Transcript	intron_variant	-	-	-	-	-	-	IMPACT=MODIFIER;STRAND=-1;FLAGS=cds_end_NF;SYMBOL=XPO1;SYMBOL_SOURCE=HGNC;HGNC_ID=12825;NEAREST=XPO1;INTRON=2/6
rs2084195	2:61756535	T	ENSG00000082898	ENST00000457483	Transcript	intron_variant	-	-	-	-	-	-	IMPACT=MODIFIER;STRAND=-1;FLAGS=cds_end_NF;SYMBOL=XPO1;SYMBOL_SOURCE=HGNC;HGNC_ID=12825;NEAREST=XPO1;INTRON=3/4
rs2084195	2:61756535	T	ENSG00000082898	ENST00000468259	Transcript	upstream_gene_variant	-	-	-	-	-	-	IMPACT=MODIFIER;DISTANCE=3625;STRAND=-1;SYMBOL=XPO1;SYMBOL_SOURCE=HGNC;HGNC_ID=12825;NEAREST=XPO1
rs2084195	2:61756535	T	ENSG00000082898	ENST00000476585	Transcript	upstream_gene_variant	-	-	-	-	-	-	IMPACT=MODIFIER;DISTANCE=2877;STRAND=-1;SYMBOL=XPO1;SYMBOL_SOURCE=HGNC;HGNC_ID=12825;NEAREST=XPO1
rs2084195	2:61756535	T	ENSG00000082898	ENST00000481214	Transcript	intron_variant,non_coding_transcript_variant	-	-	-	-	-	-	IMPACT=MODIFIER;STRAND=-1;SYMBOL=XPO1;SYMBOL_SOURCE=HGNC;HGNC_ID=12825;NEAREST=XPO1;INTRON=2/2
rs2084195	2:61756535	T	ENSG00000082898	ENST00000495003	Transcript	intron_variant,non_coding_transcript_variant	-	-	-	-	-	-	IMPACT=MODIFIER;STRAND=-1;SYMBOL=XPO1;SYMBOL_SOURCE=HGNC;HGNC_ID=12825;NEAREST=XPO1;INTRON=1/1
rs10186325	2:61757721	T	ENSG00000082898	ENST00000401558	Transcript	intron_variant	-	-	-	-	-	-	IMPACT=MODIFIER;STRAND=-1;SYMBOL=XPO1;SYMBOL_SOURCE=HGNC;HGNC_ID=12825;NEAREST=XPO1;INTRON=2/24
rs10186325	2:61757721	T	ENSG00000082898	ENST00000404992	Transcript	intron_variant	-	-	-	-	-	-	IMPACT=MODIFIER;STRAND=-1;SYMBOL=XPO1;SYMBOL_SOURCE=HGNC;HGNC_ID=12825;NEAREST=XPO1;INTRON=2/24
rs10186325	2:61757721	T	ENSG00000082898	ENST00000406957	Transcript	intron_variant	-	-	-	-	-	-	IMPACT=MODIFIER;STRAND=-1;SYMBOL=XPO1;SYMBOL_SOURCE=HGNC;HGNC_ID=12825;NEAREST=XPO1;INTRON=3/25
rs10186325	2:61757721	T	ENSG00000082898	ENST00000420673	Transcript	intron_variant	-	-	-	-	-	-	IMPACT=MODIFIER;STRAND=-1;FLAGS=cds_end_NF;SYMBOL=XPO1;SYMBOL_SOURCE=HGNC;HGNC_ID=12825;NEAREST=XPO1;INTRON=1/2
rs10186325	2:61757721	T	ENSG00000082898	ENST00000422552	Transcript	intron_variant	-	-	-	-	-	-	IMPACT=MODIFIER;STRAND=-1;FLAGS=cds_end_NF;SYMBOL=XPO1;SYMBOL_SOURCE=HGNC;HGNC_ID=12825;NEAREST=XPO1;INTRON=2/3
[truncated: 10,038 more rows]
