# Supplementary material for: GWAS for urinary sodium and potassium excretion highlights pathways shared with cardiovascular traits
Source: Nat Commun. 2019 Aug 13;10:3653. doi: 10.1038/s41467-019-11451-y (PMC6692500; doi:10.1038/s41467-019-11451-y)
Supplement: Supplementary file 6 — Supplementary Dataset 6 [file 41467_2019_11451_MOESM6_ESM.xlsx]

## Sheet: Supplementary Data 6
Supplementary Data 6: Urinary potassium SNPs associations and functional annotations at P<1×10-8.
SNP	Location	Allele	Gene	Feature	Feature_type	Consequence	cDNA_position	CDS_position	Protein_position	Amino_acids	Codons	Existing_variation	Extra
rs12944041	17:8073097	A	ENSG00000179029	ENST00000316425	Transcript	downstream_gene_variant	-	-	-	-	-	-	IMPACT=MODIFIER;DISTANCE=4222;STRAND=-1;SYMBOL=TMEM107;SYMBOL_SOURCE=HGNC;HGNC_ID=28128;NEAREST=VAMP2
rs12944041	17:8073097	A	ENSG00000200463	ENST00000363593	Transcript	downstream_gene_variant	-	-	-	-	-	-	IMPACT=MODIFIER;DISTANCE=3675;STRAND=-1;SYMBOL=SNORD118;SYMBOL_SOURCE=HGNC;HGNC_ID=32952;NEAREST=VAMP2
rs12944041	17:8073097	A	ENSG00000179029	ENST00000417073	Transcript	downstream_gene_variant	-	-	-	-	-	-	IMPACT=MODIFIER;DISTANCE=4805;STRAND=-1;SYMBOL=TMEM107;SYMBOL_SOURCE=HGNC;HGNC_ID=28128;NEAREST=VAMP2
rs12944041	17:8073097	A	ENSG00000179029	ENST00000431792	Transcript	downstream_gene_variant	-	-	-	-	-	-	IMPACT=MODIFIER;DISTANCE=4224;STRAND=-1;SYMBOL=TMEM107;SYMBOL_SOURCE=HGNC;HGNC_ID=28128;NEAREST=VAMP2
rs12944041	17:8073097	A	ENSG00000179029	ENST00000437139	Transcript	downstream_gene_variant	-	-	-	-	-	-	IMPACT=MODIFIER;DISTANCE=4188;STRAND=-1;SYMBOL=TMEM107;SYMBOL_SOURCE=HGNC;HGNC_ID=28128;NEAREST=VAMP2
rs12944041	17:8073097	A	ENSG00000179029	ENST00000449985	Transcript	downstream_gene_variant	-	-	-	-	-	-	IMPACT=MODIFIER;DISTANCE=3458;STRAND=-1;SYMBOL=TMEM107;SYMBOL_SOURCE=HGNC;HGNC_ID=28128;NEAREST=VAMP2
rs12944041	17:8073097	A	ENSG00000179029	ENST00000526920	Transcript	downstream_gene_variant	-	-	-	-	-	-	IMPACT=MODIFIER;DISTANCE=4323;STRAND=-1;SYMBOL=TMEM107;SYMBOL_SOURCE=HGNC;HGNC_ID=28128;NEAREST=VAMP2
rs12944041	17:8073097	A	ENSG00000179029	ENST00000529756	Transcript	downstream_gene_variant	-	-	-	-	-	-	IMPACT=MODIFIER;DISTANCE=4392;STRAND=-1;SYMBOL=TMEM107;SYMBOL_SOURCE=HGNC;HGNC_ID=28128;NEAREST=VAMP2
rs12944041	17:8073097	A	ENSG00000179029	ENST00000532998	Transcript	downstream_gene_variant	-	-	-	-	-	-	IMPACT=MODIFIER;DISTANCE=3963;STRAND=-1;SYMBOL=TMEM107;SYMBOL_SOURCE=HGNC;HGNC_ID=28128;NEAREST=VAMP2
rs12944041	17:8073097	A	ENSG00000179029	ENST00000533070	Transcript	downstream_gene_variant	-	-	-	-	-	-	IMPACT=MODIFIER;DISTANCE=4220;STRAND=-1;SYMBOL=TMEM107;SYMBOL_SOURCE=HGNC;HGNC_ID=28128;NEAREST=VAMP2
rs784257	18:53397199	C	ENSG00000267284	ENST00000587346	Transcript	intron_variant,non_coding_transcript_variant	-	-	-	-	-	-	IMPACT=MODIFIER;STRAND=1;SYMBOL=RP11-397A16.1;SYMBOL_SOURCE=Clone_based_vega_gene;NEAREST=TCF4;INTRON=1/4
rs784257	18:53397199	C	ENSG00000267284	ENST00000589662	Transcript	intron_variant,non_coding_transcript_variant	-	-	-	-	-	-	IMPACT=MODIFIER;STRAND=1;SYMBOL=RP11-397A16.1;SYMBOL_SOURCE=Clone_based_vega_gene;NEAREST=TCF4;INTRON=1/3
rs784257	18:53397199	C	ENSG00000267284	ENST00000592936	Transcript	intron_variant,non_coding_transcript_variant	-	-	-	-	-	-	IMPACT=MODIFIER;STRAND=1;SYMBOL=RP11-397A16.1;SYMBOL_SOURCE=Clone_based_vega_gene;NEAREST=TCF4;INTRON=1/1
rs10854166	19:18652844	G	ENSG00000105701	ENST00000222308	Transcript	intron_variant	-	-	-	-	-	-	IMPACT=MODIFIER;STRAND=-1;SYMBOL=FKBP8;SYMBOL_SOURCE=HGNC;HGNC_ID=3724;NEAREST=FKBP8;INTRON=1/8
rs10854166	19:18652844	G	ENSG00000105701	ENST00000453489	Transcript	intron_variant	-	-	-	-	-	-	IMPACT=MODIFIER;STRAND=-1;SYMBOL=FKBP8;SYMBOL_SOURCE=HGNC;HGNC_ID=3724;NEAREST=FKBP8;INTRON=1/8
rs10854166	19:18652844	G	ENSG00000105701	ENST00000544835	Transcript	intron_variant	-	-	-	-	-	-	IMPACT=MODIFIER;STRAND=-1;SYMBOL=FKBP8;SYMBOL_SOURCE=HGNC;HGNC_ID=3724;NEAREST=FKBP8;INTRON=1/5
rs10854166	19:18652844	G	ENSG00000105701	ENST00000594844	Transcript	intron_variant	-	-	-	-	-	-	IMPACT=MODIFIER;STRAND=-1;FLAGS=cds_end_NF;SYMBOL=FKBP8;SYMBOL_SOURCE=HGNC;HGNC_ID=3724;NEAREST=FKBP8;INTRON=1/3
rs10854166	19:18652844	G	ENSG00000105701	ENST00000596015	Transcript	upstream_gene_variant	-	-	-	-	-	-	IMPACT=MODIFIER;DISTANCE=3663;STRAND=-1;FLAGS=cds_start_NF;SYMBOL=FKBP8;SYMBOL_SOURCE=HGNC;HGNC_ID=3724;NEAREST=FKBP8
rs10854166	19:18652844	G	ENSG00000105701	ENST00000596494	Transcript	upstream_gene_variant	-	-	-	-	-	-	IMPACT=MODIFIER;DISTANCE=2586;STRAND=-1;SYMBOL=FKBP8;SYMBOL_SOURCE=HGNC;HGNC_ID=3724;NEAREST=FKBP8
rs10854166	19:18652844	G	ENSG00000105701	ENST00000596558	Transcript	intron_variant	-	-	-	-	-	-	IMPACT=MODIFIER;STRAND=-1;SYMBOL=FKBP8;SYMBOL_SOURCE=HGNC;HGNC_ID=3724;NEAREST=FKBP8;INTRON=1/8
rs10854166	19:18652844	G	ENSG00000105701	ENST00000597547	Transcript	intron_variant	-	-	-	-	-	-	IMPACT=MODIFIER;STRAND=-1;FLAGS=cds_end_NF;SYMBOL=FKBP8;SYMBOL_SOURCE=HGNC;HGNC_ID=3724;NEAREST=FKBP8;INTRON=1/3
rs10854166	19:18652844	G	ENSG00000105701	ENST00000597611	Transcript	intron_variant	-	-	-	-	-	-	IMPACT=MODIFIER;STRAND=-1;FLAGS=cds_end_NF;SYMBOL=FKBP8;SYMBOL_SOURCE=HGNC;HGNC_ID=3724;NEAREST=FKBP8;INTRON=1/4
rs10854166	19:18652844	G	ENSG00000105701	ENST00000597960	Transcript	intron_variant	-	-	-	-	-	-	IMPACT=MODIFIER;STRAND=-1;SYMBOL=FKBP8;SYMBOL_SOURCE=HGNC;HGNC_ID=3724;NEAREST=FKBP8;INTRON=1/8
rs10854166	19:18652844	G	ENSG00000105701	ENST00000599540	Transcript	5_prime_UTR_variant	465	-	-	-	-	-	IMPACT=MODIFIER;STRAND=-1;FLAGS=cds_end_NF;SYMBOL=FKBP8;SYMBOL_SOURCE=HGNC;HGNC_ID=3724;NEAREST=FKBP8;EXON=1/4
rs10854166	19:18652844	G	ENSG00000105701	ENST00000601844	Transcript	intron_variant,NMD_transcript_variant	-	-	-	-	-	-	IMPACT=MODIFIER;STRAND=-1;SYMBOL=FKBP8;SYMBOL_SOURCE=HGNC;HGNC_ID=3724;NEAREST=FKBP8;INTRON=1/7
rs10854166	19:18652844	G	ENSG00000105701	ENST00000606531	Transcript	upstream_gene_variant	-	-	-	-	-	-	IMPACT=MODIFIER;DISTANCE=4330;STRAND=-1;FLAGS=cds_start_NF;SYMBOL=FKBP8;SYMBOL_SOURCE=HGNC;HGNC_ID=3724;NEAREST=FKBP8
rs10854166	19:18652844	G	ENSG00000105701	ENST00000608443	Transcript	intron_variant	-	-	-	-	-	-	IMPACT=MODIFIER;STRAND=-1;SYMBOL=FKBP8;SYMBOL_SOURCE=HGNC;HGNC_ID=3724;NEAREST=FKBP8;INTRON=1/8
rs10854166	19:18652844	G	ENSG00000105701	ENST00000609656	Transcript	intron_variant	-	-	-	-	-	-	IMPACT=MODIFIER;STRAND=-1;FLAGS=cds_end_NF;SYMBOL=FKBP8;SYMBOL_SOURCE=HGNC;HGNC_ID=3724;NEAREST=FKBP8;INTRON=1/1
rs10854166	19:18652844	G	ENSG00000105701	ENST00000610101	Transcript	intron_variant	-	-	-	-	-	-	IMPACT=MODIFIER;STRAND=-1;SYMBOL=FKBP8;SYMBOL_SOURCE=HGNC;HGNC_ID=3724;NEAREST=FKBP8;INTRON=1/5
rs28694054	2:68405545	G	ENSG00000221823	ENST00000234310	Transcript	downstream_gene_variant	-	-	-	-	-	-	IMPACT=MODIFIER;DISTANCE=444;STRAND=-1;SYMBOL=PPP3R1;SYMBOL_SOURCE=HGNC;HGNC_ID=9317;NEAREST=PNO1
rs28694054	2:68405545	G	ENSG00000115946	ENST00000263657	Transcript	downstream_gene_variant	-	-	-	-	-	-	IMPACT=MODIFIER;DISTANCE=2175;STRAND=1;SYMBOL=PNO1;SYMBOL_SOURCE=HGNC;HGNC_ID=32790;NEAREST=PNO1
rs28694054	2:68405545	G	ENSG00000273398	ENST00000406334	Transcript	intron_variant,NMD_transcript_variant	-	-	-	-	-	-	IMPACT=MODIFIER;STRAND=-1;SYMBOL=RP11-474G23.1;SYMBOL_SOURCE=Clone_based_vega_gene;NEAREST=PNO1;INTRON=6/14
rs28694054	2:68405545	G	ENSG00000221823	ENST00000409377	Transcript	downstream_gene_variant	-	-	-	-	-	-	IMPACT=MODIFIER;DISTANCE=2534;STRAND=-1;SYMBOL=PPP3R1;SYMBOL_SOURCE=HGNC;HGNC_ID=9317;NEAREST=PNO1
rs28694054	2:68405545	G	ENSG00000221823	ENST00000409752	Transcript	downstream_gene_variant	-	-	-	-	-	-	IMPACT=MODIFIER;DISTANCE=2391;STRAND=-1;SYMBOL=PPP3R1;SYMBOL_SOURCE=HGNC;HGNC_ID=9317;NEAREST=PNO1
rs28694054	2:68405545	G	ENSG00000115946	ENST00000488728	Transcript	downstream_gene_variant	-	-	-	-	-	-	IMPACT=MODIFIER;DISTANCE=3449;STRAND=1;SYMBOL=PNO1;SYMBOL_SOURCE=HGNC;HGNC_ID=32790;NEAREST=PNO1
rs28694054	2:68405545	G	ENSG00000273275	ENST00000609955	Transcript	upstream_gene_variant	-	-	-	-	-	-	IMPACT=MODIFIER;DISTANCE=1420;STRAND=1;SYMBOL=RP11-474G23.2;SYMBOL_SOURCE=Clone_based_vega_gene;NEAREST=PNO1
rs687	2:68415767	A	ENSG00000221823	ENST00000234310	Transcript	synonymous_variant	503	99	33	D	gaC/gaT	-	IMPACT=LOW;STRAND=-1;SYMBOL=PPP3R1;SYMBOL_SOURCE=HGNC;HGNC_ID=9317;NEAREST=PNO1;EXON=3/6
rs687	2:68415767	A	ENSG00000273398	ENST00000406334	Transcript	synonymous_variant,NMD_transcript_variant	288	69	23	D	gaC/gaT	-	IMPACT=LOW;STRAND=-1;SYMBOL=RP11-474G23.1;SYMBOL_SOURCE=Clone_based_vega_gene;NEAREST=PNO1;EXON=4/15
rs687	2:68415767	A	ENSG00000221823	ENST00000409377	Transcript	synonymous_variant	254	69	23	D	gaC/gaT	-	IMPACT=LOW;STRAND=-1;SYMBOL=PPP3R1;SYMBOL_SOURCE=HGNC;HGNC_ID=9317;NEAREST=PNO1;EXON=3/6
rs687	2:68415767	A	ENSG00000221823	ENST00000409752	Transcript	synonymous_variant	278	156	52	D	gaC/gaT	-	IMPACT=LOW;STRAND=-1;SYMBOL=PPP3R1;SYMBOL_SOURCE=HGNC;HGNC_ID=9317;NEAREST=PNO1;EXON=3/6
rs6749303	2:68417219	A	ENSG00000221823	ENST00000234310	Transcript	intron_variant	-	-	-	-	-	-	IMPACT=MODIFIER;STRAND=-1;SYMBOL=PPP3R1;SYMBOL_SOURCE=HGNC;HGNC_ID=9317;NEAREST=PNO1;INTRON=2/5
rs6749303	2:68417219	A	ENSG00000273398	ENST00000406334	Transcript	intron_variant,NMD_transcript_variant	-	-	-	-	-	-	IMPACT=MODIFIER;STRAND=-1;SYMBOL=RP11-474G23.1;SYMBOL_SOURCE=Clone_based_vega_gene;NEAREST=PNO1;INTRON=3/14
rs6749303	2:68417219	A	ENSG00000221823	ENST00000409377	Transcript	intron_variant	-	-	-	-	-	-	IMPACT=MODIFIER;STRAND=-1;SYMBOL=PPP3R1;SYMBOL_SOURCE=HGNC;HGNC_ID=9317;NEAREST=PNO1;INTRON=2/5
rs6749303	2:68417219	A	ENSG00000221823	ENST00000409752	Transcript	intron_variant	-	-	-	-	-	-	IMPACT=MODIFIER;STRAND=-1;SYMBOL=PPP3R1;SYMBOL_SOURCE=HGNC;HGNC_ID=9317;NEAREST=PNO1;INTRON=2/5
rs12053466	2:68423492	T	ENSG00000221823	ENST00000234310	Transcript	intron_variant	-	-	-	-	-	-	IMPACT=MODIFIER;STRAND=-1;SYMBOL=PPP3R1;SYMBOL_SOURCE=HGNC;HGNC_ID=9317;NEAREST=PNO1;INTRON=2/5
rs12053466	2:68423492	T	ENSG00000273398	ENST00000406334	Transcript	intron_variant,NMD_transcript_variant	-	-	-	-	-	-	IMPACT=MODIFIER;STRAND=-1;SYMBOL=RP11-474G23.1;SYMBOL_SOURCE=Clone_based_vega_gene;NEAREST=PNO1;INTRON=3/14
rs12053466	2:68423492	T	ENSG00000221823	ENST00000409377	Transcript	intron_variant	-	-	-	-	-	-	IMPACT=MODIFIER;STRAND=-1;SYMBOL=PPP3R1;SYMBOL_SOURCE=HGNC;HGNC_ID=9317;NEAREST=PNO1;INTRON=2/5
rs12053466	2:68423492	T	ENSG00000221823	ENST00000409752	Transcript	intron_variant	-	-	-	-	-	-	IMPACT=MODIFIER;STRAND=-1;SYMBOL=PPP3R1;SYMBOL_SOURCE=HGNC;HGNC_ID=9317;NEAREST=PNO1;INTRON=2/5
rs12053466	2:68423492	T	-	ENSR00000291355	RegulatoryFeature	regulatory_region_variant	-	-	-	-	-	-	IMPACT=MODIFIER;NEAREST=PNO1;BIOTYPE=CTCF_binding_site
rs12053466	2:68423492	T	-	ENSR00000384851	RegulatoryFeature	regulatory_region_variant	-	-	-	-	-	-	IMPACT=MODIFIER;NEAREST=PNO1;BIOTYPE=open_chromatin_region
rs60620861	2:68426291	C	ENSG00000221823	ENST00000234310	Transcript	intron_variant	-	-	-	-	-	-	IMPACT=MODIFIER;STRAND=-1;SYMBOL=PPP3R1;SYMBOL_SOURCE=HGNC;HGNC_ID=9317;NEAREST=PNO1;INTRON=2/5
rs60620861	2:68426291	C	ENSG00000273398	ENST00000406334	Transcript	intron_variant,NMD_transcript_variant	-	-	-	-	-	-	IMPACT=MODIFIER;STRAND=-1;SYMBOL=RP11-474G23.1;SYMBOL_SOURCE=Clone_based_vega_gene;NEAREST=PNO1;INTRON=3/14
rs60620861	2:68426291	C	ENSG00000221823	ENST00000409377	Transcript	intron_variant	-	-	-	-	-	-	IMPACT=MODIFIER;STRAND=-1;SYMBOL=PPP3R1;SYMBOL_SOURCE=HGNC;HGNC_ID=9317;NEAREST=PNO1;INTRON=2/5
rs60620861	2:68426291	C	ENSG00000221823	ENST00000409752	Transcript	intron_variant	-	-	-	-	-	-	IMPACT=MODIFIER;STRAND=-1;SYMBOL=PPP3R1;SYMBOL_SOURCE=HGNC;HGNC_ID=9317;NEAREST=PNO1;INTRON=2/5
rs59883268	2:68426527	G	ENSG00000221823	ENST00000234310	Transcript	intron_variant	-	-	-	-	-	-	IMPACT=MODIFIER;STRAND=-1;SYMBOL=PPP3R1;SYMBOL_SOURCE=HGNC;HGNC_ID=9317;NEAREST=PNO1;INTRON=2/5
rs59883268	2:68426527	G	ENSG00000273398	ENST00000406334	Transcript	intron_variant,NMD_transcript_variant	-	-	-	-	-	-	IMPACT=MODIFIER;STRAND=-1;SYMBOL=RP11-474G23.1;SYMBOL_SOURCE=Clone_based_vega_gene;NEAREST=PNO1;INTRON=3/14
rs59883268	2:68426527	G	ENSG00000221823	ENST00000409377	Transcript	intron_variant	-	-	-	-	-	-	IMPACT=MODIFIER;STRAND=-1;SYMBOL=PPP3R1;SYMBOL_SOURCE=HGNC;HGNC_ID=9317;NEAREST=PNO1;INTRON=2/5
rs59883268	2:68426527	G	ENSG00000221823	ENST00000409752	Transcript	intron_variant	-	-	-	-	-	-	IMPACT=MODIFIER;STRAND=-1;SYMBOL=PPP3R1;SYMBOL_SOURCE=HGNC;HGNC_ID=9317;NEAREST=PNO1;INTRON=2/5
rs13395335	2:68426624	A	ENSG00000221823	ENST00000234310	Transcript	intron_variant	-	-	-	-	-	-	IMPACT=MODIFIER;STRAND=-1;SYMBOL=PPP3R1;SYMBOL_SOURCE=HGNC;HGNC_ID=9317;NEAREST=PNO1;INTRON=2/5
rs13395335	2:68426624	A	ENSG00000273398	ENST00000406334	Transcript	intron_variant,NMD_transcript_variant	-	-	-	-	-	-	IMPACT=MODIFIER;STRAND=-1;SYMBOL=RP11-474G23.1;SYMBOL_SOURCE=Clone_based_vega_gene;NEAREST=PNO1;INTRON=3/14
rs13395335	2:68426624	A	ENSG00000221823	ENST00000409377	Transcript	intron_variant	-	-	-	-	-	-	IMPACT=MODIFIER;STRAND=-1;SYMBOL=PPP3R1;SYMBOL_SOURCE=HGNC;HGNC_ID=9317;NEAREST=PNO1;INTRON=2/5
rs13395335	2:68426624	A	ENSG00000221823	ENST00000409752	Transcript	intron_variant	-	-	-	-	-	-	IMPACT=MODIFIER;STRAND=-1;SYMBOL=PPP3R1;SYMBOL_SOURCE=HGNC;HGNC_ID=9317;NEAREST=PNO1;INTRON=2/5
rs62145958	2:68426902	C	ENSG00000221823	ENST00000234310	Transcript	intron_variant	-	-	-	-	-	-	IMPACT=MODIFIER;STRAND=-1;SYMBOL=PPP3R1;SYMBOL_SOURCE=HGNC;HGNC_ID=9317;NEAREST=PNO1;INTRON=2/5
rs62145958	2:68426902	C	ENSG00000273398	ENST00000406334	Transcript	intron_variant,NMD_transcript_variant	-	-	-	-	-	-	IMPACT=MODIFIER;STRAND=-1;SYMBOL=RP11-474G23.1;SYMBOL_SOURCE=Clone_based_vega_gene;NEAREST=PNO1;INTRON=3/14
rs62145958	2:68426902	C	ENSG00000221823	ENST00000409377	Transcript	intron_variant	-	-	-	-	-	-	IMPACT=MODIFIER;STRAND=-1;SYMBOL=PPP3R1;SYMBOL_SOURCE=HGNC;HGNC_ID=9317;NEAREST=PNO1;INTRON=2/5
rs62145958	2:68426902	C	ENSG00000221823	ENST00000409752	Transcript	intron_variant	-	-	-	-	-	-	IMPACT=MODIFIER;STRAND=-1;SYMBOL=PPP3R1;SYMBOL_SOURCE=HGNC;HGNC_ID=9317;NEAREST=PNO1;INTRON=2/5
rs13402188	2:68428283	C	ENSG00000221823	ENST00000234310	Transcript	intron_variant	-	-	-	-	-	-	IMPACT=MODIFIER;STRAND=-1;SYMBOL=PPP3R1;SYMBOL_SOURCE=HGNC;HGNC_ID=9317;NEAREST=PNO1;INTRON=2/5
rs13402188	2:68428283	C	ENSG00000273398	ENST00000406334	Transcript	intron_variant,NMD_transcript_variant	-	-	-	-	-	-	IMPACT=MODIFIER;STRAND=-1;SYMBOL=RP11-474G23.1;SYMBOL_SOURCE=Clone_based_vega_gene;NEAREST=PNO1;INTRON=3/14
rs13402188	2:68428283	C	ENSG00000221823	ENST00000409377	Transcript	intron_variant	-	-	-	-	-	-	IMPACT=MODIFIER;STRAND=-1;SYMBOL=PPP3R1;SYMBOL_SOURCE=HGNC;HGNC_ID=9317;NEAREST=PNO1;INTRON=2/5
rs13402188	2:68428283	C	ENSG00000221823	ENST00000409752	Transcript	intron_variant	-	-	-	-	-	-	IMPACT=MODIFIER;STRAND=-1;SYMBOL=PPP3R1;SYMBOL_SOURCE=HGNC;HGNC_ID=9317;NEAREST=PNO1;INTRON=2/5
rs6733029	2:68434157	C	ENSG00000221823	ENST00000234310	Transcript	intron_variant	-	-	-	-	-	-	IMPACT=MODIFIER;STRAND=-1;SYMBOL=PPP3R1;SYMBOL_SOURCE=HGNC;HGNC_ID=9317;NEAREST=PPP3R1;INTRON=2/5
rs6733029	2:68434157	C	ENSG00000273398	ENST00000406334	Transcript	intron_variant,NMD_transcript_variant	-	-	-	-	-	-	IMPACT=MODIFIER;STRAND=-1;SYMBOL=RP11-474G23.1;SYMBOL_SOURCE=Clone_based_vega_gene;NEAREST=PPP3R1;INTRON=3/14
rs6733029	2:68434157	C	ENSG00000221823	ENST00000409377	Transcript	intron_variant	-	-	-	-	-	-	IMPACT=MODIFIER;STRAND=-1;SYMBOL=PPP3R1;SYMBOL_SOURCE=HGNC;HGNC_ID=9317;NEAREST=PPP3R1;INTRON=2/5
rs6733029	2:68434157	C	ENSG00000221823	ENST00000409752	Transcript	intron_variant	-	-	-	-	-	-	IMPACT=MODIFIER;STRAND=-1;SYMBOL=PPP3R1;SYMBOL_SOURCE=HGNC;HGNC_ID=9317;NEAREST=PPP3R1;INTRON=2/5
rs2122127	2:68445354	G	ENSG00000221823	ENST00000234310	Transcript	intron_variant	-	-	-	-	-	-	IMPACT=MODIFIER;STRAND=-1;SYMBOL=PPP3R1;SYMBOL_SOURCE=HGNC;HGNC_ID=9317;NEAREST=PPP3R1;INTRON=1/5
rs2122127	2:68445354	G	ENSG00000273398	ENST00000406334	Transcript	intron_variant,NMD_transcript_variant	-	-	-	-	-	-	IMPACT=MODIFIER;STRAND=-1;SYMBOL=RP11-474G23.1;SYMBOL_SOURCE=Clone_based_vega_gene;NEAREST=PPP3R1;INTRON=2/14
rs2122127	2:68445354	G	ENSG00000221823	ENST00000409377	Transcript	intron_variant	-	-	-	-	-	-	IMPACT=MODIFIER;STRAND=-1;SYMBOL=PPP3R1;SYMBOL_SOURCE=HGNC;HGNC_ID=9317;NEAREST=PPP3R1;INTRON=1/5
rs2122127	2:68445354	G	ENSG00000221823	ENST00000409752	Transcript	intron_variant	-	-	-	-	-	-	IMPACT=MODIFIER;STRAND=-1;SYMBOL=PPP3R1;SYMBOL_SOURCE=HGNC;HGNC_ID=9317;NEAREST=PPP3R1;INTRON=1/5
rs2278790	2:68445569	A	ENSG00000221823	ENST00000234310	Transcript	intron_variant	-	-	-	-	-	-	IMPACT=MODIFIER;STRAND=-1;SYMBOL=PPP3R1;SYMBOL_SOURCE=HGNC;HGNC_ID=9317;NEAREST=PPP3R1;INTRON=1/5
rs2278790	2:68445569	A	ENSG00000273398	ENST00000406334	Transcript	intron_variant,NMD_transcript_variant	-	-	-	-	-	-	IMPACT=MODIFIER;STRAND=-1;SYMBOL=RP11-474G23.1;SYMBOL_SOURCE=Clone_based_vega_gene;NEAREST=PPP3R1;INTRON=2/14
rs2278790	2:68445569	A	ENSG00000221823	ENST00000409377	Transcript	intron_variant	-	-	-	-	-	-	IMPACT=MODIFIER;STRAND=-1;SYMBOL=PPP3R1;SYMBOL_SOURCE=HGNC;HGNC_ID=9317;NEAREST=PPP3R1;INTRON=1/5
rs2278790	2:68445569	A	ENSG00000221823	ENST00000409752	Transcript	intron_variant	-	-	-	-	-	-	IMPACT=MODIFIER;STRAND=-1;SYMBOL=PPP3R1;SYMBOL_SOURCE=HGNC;HGNC_ID=9317;NEAREST=PPP3R1;INTRON=1/5
rs2278790	2:68445569	A	-	ENSR00000384854	RegulatoryFeature	regulatory_region_variant	-	-	-	-	-	-	IMPACT=MODIFIER;NEAREST=PPP3R1;BIOTYPE=promoter_flanking_region
rs1822469	2:68454685	T	ENSG00000221823	ENST00000234310	Transcript	intron_variant	-	-	-	-	-	-	IMPACT=MODIFIER;STRAND=-1;SYMBOL=PPP3R1;SYMBOL_SOURCE=HGNC;HGNC_ID=9317;NEAREST=PPP3R1;INTRON=1/5
rs1822469	2:68454685	T	ENSG00000216115	ENST00000401296	Transcript	upstream_gene_variant	-	-	-	-	-	-	IMPACT=MODIFIER;DISTANCE=2373;STRAND=1;SYMBOL=AC017083.1;SYMBOL_SOURCE=Clone_based_ensembl_gene;NEAREST=PPP3R1
rs1822469	2:68454685	T	ENSG00000273398	ENST00000406334	Transcript	intron_variant,NMD_transcript_variant	-	-	-	-	-	-	IMPACT=MODIFIER;STRAND=-1;SYMBOL=RP11-474G23.1;SYMBOL_SOURCE=Clone_based_vega_gene;NEAREST=PPP3R1;INTRON=2/14
rs1822469	2:68454685	T	ENSG00000221823	ENST00000409377	Transcript	intron_variant	-	-	-	-	-	-	IMPACT=MODIFIER;STRAND=-1;SYMBOL=PPP3R1;SYMBOL_SOURCE=HGNC;HGNC_ID=9317;NEAREST=PPP3R1;INTRON=1/5
rs1822469	2:68454685	T	ENSG00000221823	ENST00000409752	Transcript	intron_variant	-	-	-	-	-	-	IMPACT=MODIFIER;STRAND=-1;SYMBOL=PPP3R1;SYMBOL_SOURCE=HGNC;HGNC_ID=9317;NEAREST=PPP3R1;INTRON=1/5
rs4519508	2:68479576	A	ENSG00000221823	ENST00000234310	Transcript	5_prime_UTR_variant	88	-	-	-	-	-	IMPACT=MODIFIER;STRAND=-1;SYMBOL=PPP3R1;SYMBOL_SOURCE=HGNC;HGNC_ID=9317;NEAREST=PPP3R1;EXON=1/6
rs4519508	2:68479576	A	ENSG00000273398	ENST00000406334	Transcript	intron_variant,NMD_transcript_variant	-	-	-	-	-	-	IMPACT=MODIFIER;STRAND=-1;SYMBOL=RP11-474G23.1;SYMBOL_SOURCE=Clone_based_vega_gene;NEAREST=PPP3R1;INTRON=2/14
rs4519508	2:68479576	A	ENSG00000221823	ENST00000409377	Transcript	upstream_gene_variant	-	-	-	-	-	-	IMPACT=MODIFIER;DISTANCE=1296;STRAND=-1;SYMBOL=PPP3R1;SYMBOL_SOURCE=HGNC;HGNC_ID=9317;NEAREST=PPP3R1
rs4519508	2:68479576	A	ENSG00000221823	ENST00000409752	Transcript	intron_variant	-	-	-	-	-	-	IMPACT=MODIFIER;STRAND=-1;SYMBOL=PPP3R1;SYMBOL_SOURCE=HGNC;HGNC_ID=9317;NEAREST=PPP3R1;INTRON=1/5
rs4519508	2:68479576	A	ENSG00000273064	ENST00000608069	Transcript	upstream_gene_variant	-	-	-	-	-	-	IMPACT=MODIFIER;DISTANCE=426;STRAND=1;SYMBOL=RP11-474G23.3;SYMBOL_SOURCE=Clone_based_vega_gene;NEAREST=PPP3R1
rs4519508	2:68479576	A	-	ENSR00000118368	RegulatoryFeature	regulatory_region_variant	-	-	-	-	-	-	IMPACT=MODIFIER;NEAREST=PPP3R1;BIOTYPE=promoter
rs2861818	2:68482348	C	ENSG00000221823	ENST00000234310	Transcript	upstream_gene_variant	-	-	-	-	-	-	IMPACT=MODIFIER;DISTANCE=2685;STRAND=-1;SYMBOL=PPP3R1;SYMBOL_SOURCE=HGNC;HGNC_ID=9317;NEAREST=PPP3R1
rs2861818	2:68482348	C	ENSG00000273398	ENST00000406334	Transcript	intron_variant,NMD_transcript_variant	-	-	-	-	-	-	IMPACT=MODIFIER;STRAND=-1;SYMBOL=RP11-474G23.1;SYMBOL_SOURCE=Clone_based_vega_gene;NEAREST=PPP3R1;INTRON=1/14
rs2861818	2:68482348	C	ENSG00000221823	ENST00000409377	Transcript	upstream_gene_variant	-	-	-	-	-	-	IMPACT=MODIFIER;DISTANCE=4068;STRAND=-1;SYMBOL=PPP3R1;SYMBOL_SOURCE=HGNC;HGNC_ID=9317;NEAREST=PPP3R1
rs2861818	2:68482348	C	ENSG00000221823	ENST00000409752	Transcript	intron_variant	-	-	-	-	-	-	IMPACT=MODIFIER;STRAND=-1;SYMBOL=PPP3R1;SYMBOL_SOURCE=HGNC;HGNC_ID=9317;NEAREST=PPP3R1;INTRON=1/5
rs2861818	2:68482348	C	ENSG00000273064	ENST00000608069	Transcript	downstream_gene_variant	-	-	-	-	-	-	IMPACT=MODIFIER;DISTANCE=1368;STRAND=1;SYMBOL=RP11-474G23.3;SYMBOL_SOURCE=Clone_based_vega_gene;NEAREST=PPP3R1
rs7593613	2:68483396	T	ENSG00000221823	ENST00000234310	Transcript	upstream_gene_variant	-	-	-	-	-	-	IMPACT=MODIFIER;DISTANCE=3733;STRAND=-1;SYMBOL=PPP3R1;SYMBOL_SOURCE=HGNC;HGNC_ID=9317;NEAREST=PPP3R1
rs7593613	2:68483396	T	ENSG00000273398	ENST00000406334	Transcript	intron_variant,NMD_transcript_variant	-	-	-	-	-	-	IMPACT=MODIFIER;STRAND=-1;SYMBOL=RP11-474G23.1;SYMBOL_SOURCE=Clone_based_vega_gene;NEAREST=PPP3R1;INTRON=1/14
rs7593613	2:68483396	T	ENSG00000221823	ENST00000409752	Transcript	upstream_gene_variant	-	-	-	-	-	-	IMPACT=MODIFIER;DISTANCE=27;STRAND=-1;SYMBOL=PPP3R1;SYMBOL_SOURCE=HGNC;HGNC_ID=9317;NEAREST=PPP3R1
rs7593613	2:68483396	T	ENSG00000273064	ENST00000608069	Transcript	downstream_gene_variant	-	-	-	-	-	-	IMPACT=MODIFIER;DISTANCE=2416;STRAND=1;SYMBOL=RP11-474G23.3;SYMBOL_SOURCE=Clone_based_vega_gene;NEAREST=PPP3R1
rs7593613	2:68483396	T	-	ENSR00000118369	RegulatoryFeature	regulatory_region_variant	-	-	-	-	-	-	IMPACT=MODIFIER;NEAREST=PPP3R1;BIOTYPE=enhancer
rs6546367	2:68495243	A	ENSG00000221443	ENST00000408516	Transcript	upstream_gene_variant	-	-	-	-	-	-	IMPACT=MODIFIER;DISTANCE=4993;STRAND=1;SYMBOL=AC017083.3;SYMBOL_SOURCE=Clone_based_ensembl_gene;NEAREST=PPP3R1
rs66506821	3:27121942	A	-	-	-	intergenic_variant	-	-	-	-	-	-	IMPACT=MODIFIER;NEAREST=NEK10
rs1402980	3:27123670	A	-	-	-	intergenic_variant	-	-	-	-	-	-	IMPACT=MODIFIER;NEAREST=NEK10
rs17349692	3:27124001	A	-	-	-	intergenic_variant	-	-	-	-	-	-	IMPACT=MODIFIER;NEAREST=NEK10
rs67565656	3:27124194	A	-	-	-	intergenic_variant	-	-	-	-	-	-	IMPACT=MODIFIER;NEAREST=NEK10
rs1402975	3:27125652	A	-	-	-	intergenic_variant	-	-	-	-	-	-	IMPACT=MODIFIER;NEAREST=NEK10
rs1402972	3:27131168	G	-	-	-	intergenic_variant	-	-	-	-	-	-	IMPACT=MODIFIER;NEAREST=NEK10
rs10865811	3:27135957	A	-	-	-	intergenic_variant	-	-	-	-	-	-	IMPACT=MODIFIER;NEAREST=NEK10
rs67573383	3:27138586	A	-	-	-	intergenic_variant	-	-	-	-	-	-	IMPACT=MODIFIER;NEAREST=NEK10
rs11129261	3:27141808	A	-	-	-	intergenic_variant	-	-	-	-	-	-	IMPACT=MODIFIER;NEAREST=NEK10
rs11129262	3:27143287	G	-	-	-	intergenic_variant	-	-	-	-	-	-	IMPACT=MODIFIER;NEAREST=NEK10
rs11129263	3:27143527	G	-	-	-	intergenic_variant	-	-	-	-	-	-	IMPACT=MODIFIER;NEAREST=NEK10
rs2370925	3:27144161	G	-	-	-	intergenic_variant	-	-	-	-	-	-	IMPACT=MODIFIER;NEAREST=NEK10
rs12488954	3:27145162	A	-	-	-	intergenic_variant	-	-	-	-	-	-	IMPACT=MODIFIER;NEAREST=NEK10
rs11710255	3:27145591	G	-	-	-	intergenic_variant	-	-	-	-	-	-	IMPACT=MODIFIER;NEAREST=NEK10
rs11129264	3:27146294	G	-	-	-	intergenic_variant	-	-	-	-	-	-	IMPACT=MODIFIER;NEAREST=NEK10
rs1522151	3:27165174	G	ENSG00000163491	ENST00000295720	Transcript	intron_variant	-	-	-	-	-	-	IMPACT=MODIFIER;STRAND=-1;SYMBOL=NEK10;SYMBOL_SOURCE=HGNC;HGNC_ID=18592;NEAREST=NEK10;INTRON=13/16
rs1522151	3:27165174	G	ENSG00000163491	ENST00000383770	Transcript	intron_variant	-	-	-	-	-	-	IMPACT=MODIFIER;STRAND=-1;SYMBOL=NEK10;SYMBOL_SOURCE=HGNC;HGNC_ID=18592;NEAREST=NEK10;INTRON=11/14
rs1522151	3:27165174	G	ENSG00000163491	ENST00000383771	Transcript	intron_variant	-	-	-	-	-	-	IMPACT=MODIFIER;STRAND=-1;SYMBOL=NEK10;SYMBOL_SOURCE=HGNC;HGNC_ID=18592;NEAREST=NEK10;INTRON=12/15
rs1522151	3:27165174	G	ENSG00000163491	ENST00000429845	Transcript	intron_variant	-	-	-	-	-	-	IMPACT=MODIFIER;STRAND=-1;SYMBOL=NEK10;SYMBOL_SOURCE=HGNC;HGNC_ID=18592;NEAREST=NEK10;INTRON=35/38
rs56259835	3:27166202	T	ENSG00000163491	ENST00000295720	Transcript	intron_variant	-	-	-	-	-	-	IMPACT=MODIFIER;STRAND=-1;SYMBOL=NEK10;SYMBOL_SOURCE=HGNC;HGNC_ID=18592;NEAREST=NEK10;INTRON=13/16
rs56259835	3:27166202	T	ENSG00000163491	ENST00000383770	Transcript	intron_variant	-	-	-	-	-	-	IMPACT=MODIFIER;STRAND=-1;SYMBOL=NEK10;SYMBOL_SOURCE=HGNC;HGNC_ID=18592;NEAREST=NEK10;INTRON=11/14
rs56259835	3:27166202	T	ENSG00000163491	ENST00000383771	Transcript	intron_variant	-	-	-	-	-	-	IMPACT=MODIFIER;STRAND=-1;SYMBOL=NEK10;SYMBOL_SOURCE=HGNC;HGNC_ID=18592;NEAREST=NEK10;INTRON=12/15
rs56259835	3:27166202	T	ENSG00000163491	ENST00000429845	Transcript	intron_variant	-	-	-	-	-	-	IMPACT=MODIFIER;STRAND=-1;SYMBOL=NEK10;SYMBOL_SOURCE=HGNC;HGNC_ID=18592;NEAREST=NEK10;INTRON=35/38
rs11719250	3:27174261	T	ENSG00000163491	ENST00000295720	Transcript	intron_variant	-	-	-	-	-	-	IMPACT=MODIFIER;STRAND=-1;SYMBOL=NEK10;SYMBOL_SOURCE=HGNC;HGNC_ID=18592;NEAREST=NEK10;INTRON=12/16
rs11719250	3:27174261	T	ENSG00000163491	ENST00000383770	Transcript	intron_variant	-	-	-	-	-	-	IMPACT=MODIFIER;STRAND=-1;SYMBOL=NEK10;SYMBOL_SOURCE=HGNC;HGNC_ID=18592;NEAREST=NEK10;INTRON=10/14
rs11719250	3:27174261	T	ENSG00000163491	ENST00000383771	Transcript	intron_variant	-	-	-	-	-	-	IMPACT=MODIFIER;STRAND=-1;SYMBOL=NEK10;SYMBOL_SOURCE=HGNC;HGNC_ID=18592;NEAREST=NEK10;INTRON=11/15
rs11719250	3:27174261	T	ENSG00000163491	ENST00000429845	Transcript	intron_variant	-	-	-	-	-	-	IMPACT=MODIFIER;STRAND=-1;SYMBOL=NEK10;SYMBOL_SOURCE=HGNC;HGNC_ID=18592;NEAREST=NEK10;INTRON=34/38
rs11719250	3:27174261	T	ENSG00000163491	ENST00000498182	Transcript	intron_variant,non_coding_transcript_variant	-	-	-	-	-	-	IMPACT=MODIFIER;STRAND=-1;SYMBOL=NEK10;SYMBOL_SOURCE=HGNC;HGNC_ID=18592;NEAREST=NEK10;INTRON=7/7
rs1357245	3:27186602	T	ENSG00000163491	ENST00000295720	Transcript	intron_variant	-	-	-	-	-	-	IMPACT=MODIFIER;STRAND=-1;SYMBOL=NEK10;SYMBOL_SOURCE=HGNC;HGNC_ID=18592;NEAREST=NEK10;INTRON=10/16
rs1357245	3:27186602	T	ENSG00000163491	ENST00000383770	Transcript	intron_variant	-	-	-	-	-	-	IMPACT=MODIFIER;STRAND=-1;SYMBOL=NEK10;SYMBOL_SOURCE=HGNC;HGNC_ID=18592;NEAREST=NEK10;INTRON=9/14
rs1357245	3:27186602	T	ENSG00000163491	ENST00000383771	Transcript	intron_variant	-	-	-	-	-	-	IMPACT=MODIFIER;STRAND=-1;SYMBOL=NEK10;SYMBOL_SOURCE=HGNC;HGNC_ID=18592;NEAREST=NEK10;INTRON=10/15
rs1357245	3:27186602	T	ENSG00000163491	ENST00000429845	Transcript	intron_variant	-	-	-	-	-	-	IMPACT=MODIFIER;STRAND=-1;SYMBOL=NEK10;SYMBOL_SOURCE=HGNC;HGNC_ID=18592;NEAREST=NEK10;INTRON=32/38
rs1357245	3:27186602	T	ENSG00000163491	ENST00000498182	Transcript	intron_variant,non_coding_transcript_variant	-	-	-	-	-	-	IMPACT=MODIFIER;STRAND=-1;SYMBOL=NEK10;SYMBOL_SOURCE=HGNC;HGNC_ID=18592;NEAREST=NEK10;INTRON=6/7
rs11129266	3:27194165	T	ENSG00000163491	ENST00000295720	Transcript	intron_variant	-	-	-	-	-	-	IMPACT=MODIFIER;STRAND=-1;SYMBOL=NEK10;SYMBOL_SOURCE=HGNC;HGNC_ID=18592;NEAREST=NEK10;INTRON=10/16
rs11129266	3:27194165	T	ENSG00000163491	ENST00000383770	Transcript	intron_variant	-	-	-	-	-	-	IMPACT=MODIFIER;STRAND=-1;SYMBOL=NEK10;SYMBOL_SOURCE=HGNC;HGNC_ID=18592;NEAREST=NEK10;INTRON=9/14
rs11129266	3:27194165	T	ENSG00000163491	ENST00000383771	Transcript	intron_variant	-	-	-	-	-	-	IMPACT=MODIFIER;STRAND=-1;SYMBOL=NEK10;SYMBOL_SOURCE=HGNC;HGNC_ID=18592;NEAREST=NEK10;INTRON=10/15
rs11129266	3:27194165	T	ENSG00000163491	ENST00000429845	Transcript	intron_variant	-	-	-	-	-	-	IMPACT=MODIFIER;STRAND=-1;SYMBOL=NEK10;SYMBOL_SOURCE=HGNC;HGNC_ID=18592;NEAREST=NEK10;INTRON=32/38
rs11129266	3:27194165	T	ENSG00000163491	ENST00000498182	Transcript	intron_variant,non_coding_transcript_variant	-	-	-	-	-	-	IMPACT=MODIFIER;STRAND=-1;SYMBOL=NEK10;SYMBOL_SOURCE=HGNC;HGNC_ID=18592;NEAREST=NEK10;INTRON=6/7
rs1851366	3:27194844	C	ENSG00000163491	ENST00000295720	Transcript	intron_variant	-	-	-	-	-	-	IMPACT=MODIFIER;STRAND=-1;SYMBOL=NEK10;SYMBOL_SOURCE=HGNC;HGNC_ID=18592;NEAREST=NEK10;INTRON=10/16
rs1851366	3:27194844	C	ENSG00000163491	ENST00000383770	Transcript	intron_variant	-	-	-	-	-	-	IMPACT=MODIFIER;STRAND=-1;SYMBOL=NEK10;SYMBOL_SOURCE=HGNC;HGNC_ID=18592;NEAREST=NEK10;INTRON=9/14
rs1851366	3:27194844	C	ENSG00000163491	ENST00000383771	Transcript	intron_variant	-	-	-	-	-	-	IMPACT=MODIFIER;STRAND=-1;SYMBOL=NEK10;SYMBOL_SOURCE=HGNC;HGNC_ID=18592;NEAREST=NEK10;INTRON=10/15
rs1851366	3:27194844	C	ENSG00000163491	ENST00000429845	Transcript	intron_variant	-	-	-	-	-	-	IMPACT=MODIFIER;STRAND=-1;SYMBOL=NEK10;SYMBOL_SOURCE=HGNC;HGNC_ID=18592;NEAREST=NEK10;INTRON=32/38
rs1851366	3:27194844	C	ENSG00000163491	ENST00000498182	Transcript	intron_variant,non_coding_transcript_variant	-	-	-	-	-	-	IMPACT=MODIFIER;STRAND=-1;SYMBOL=NEK10;SYMBOL_SOURCE=HGNC;HGNC_ID=18592;NEAREST=NEK10;INTRON=6/7
rs12495041	3:27197869	A	ENSG00000163491	ENST00000295720	Transcript	intron_variant	-	-	-	-	-	-	IMPACT=MODIFIER;STRAND=-1;SYMBOL=NEK10;SYMBOL_SOURCE=HGNC;HGNC_ID=18592;NEAREST=NEK10;INTRON=10/16
rs12495041	3:27197869	A	ENSG00000163491	ENST00000383770	Transcript	intron_variant	-	-	-	-	-	-	IMPACT=MODIFIER;STRAND=-1;SYMBOL=NEK10;SYMBOL_SOURCE=HGNC;HGNC_ID=18592;NEAREST=NEK10;INTRON=9/14
rs12495041	3:27197869	A	ENSG00000163491	ENST00000383771	Transcript	intron_variant	-	-	-	-	-	-	IMPACT=MODIFIER;STRAND=-1;SYMBOL=NEK10;SYMBOL_SOURCE=HGNC;HGNC_ID=18592;NEAREST=NEK10;INTRON=10/15
rs12495041	3:27197869	A	ENSG00000163491	ENST00000429845	Transcript	intron_variant	-	-	-	-	-	-	IMPACT=MODIFIER;STRAND=-1;SYMBOL=NEK10;SYMBOL_SOURCE=HGNC;HGNC_ID=18592;NEAREST=NEK10;INTRON=32/38
rs12495041	3:27197869	A	ENSG00000163491	ENST00000498182	Transcript	intron_variant,non_coding_transcript_variant	-	-	-	-	-	-	IMPACT=MODIFIER;STRAND=-1;SYMBOL=NEK10;SYMBOL_SOURCE=HGNC;HGNC_ID=18592;NEAREST=NEK10;INTRON=6/7
rs1609978	3:27203626	A	ENSG00000163491	ENST00000295720	Transcript	intron_variant	-	-	-	-	-	-	IMPACT=MODIFIER;STRAND=-1;SYMBOL=NEK10;SYMBOL_SOURCE=HGNC;HGNC_ID=18592;NEAREST=NEK10;INTRON=10/16
rs1609978	3:27203626	A	ENSG00000163491	ENST00000357467	Transcript	downstream_gene_variant	-	-	-	-	-	-	IMPACT=MODIFIER;DISTANCE=131;STRAND=-1;SYMBOL=NEK10;SYMBOL_SOURCE=HGNC;HGNC_ID=18592;NEAREST=NEK10
rs1609978	3:27203626	A	ENSG00000163491	ENST00000383770	Transcript	intron_variant	-	-	-	-	-	-	IMPACT=MODIFIER;STRAND=-1;SYMBOL=NEK10;SYMBOL_SOURCE=HGNC;HGNC_ID=18592;NEAREST=NEK10;INTRON=9/14
rs1609978	3:27203626	A	ENSG00000163491	ENST00000383771	Transcript	intron_variant	-	-	-	-	-	-	IMPACT=MODIFIER;STRAND=-1;SYMBOL=NEK10;SYMBOL_SOURCE=HGNC;HGNC_ID=18592;NEAREST=NEK10;INTRON=10/15
rs1609978	3:27203626	A	ENSG00000163491	ENST00000429845	Transcript	intron_variant	-	-	-	-	-	-	IMPACT=MODIFIER;STRAND=-1;SYMBOL=NEK10;SYMBOL_SOURCE=HGNC;HGNC_ID=18592;NEAREST=NEK10;INTRON=32/38
rs1609978	3:27203626	A	ENSG00000163491	ENST00000498182	Transcript	intron_variant,non_coding_transcript_variant	-	-	-	-	-	-	IMPACT=MODIFIER;STRAND=-1;SYMBOL=NEK10;SYMBOL_SOURCE=HGNC;HGNC_ID=18592;NEAREST=NEK10;INTRON=6/7
rs1609978	3:27203626	A	ENSG00000163491	ENST00000574215	Transcript	downstream_gene_variant	-	-	-	-	-	-	IMPACT=MODIFIER;DISTANCE=131;STRAND=-1;SYMBOL=NEK10;SYMBOL_SOURCE=HGNC;HGNC_ID=18592;NEAREST=NEK10
rs1013673	3:27206003	C	ENSG00000163491	ENST00000295720	Transcript	intron_variant	-	-	-	-	-	-	IMPACT=MODIFIER;STRAND=-1;SYMBOL=NEK10;SYMBOL_SOURCE=HGNC;HGNC_ID=18592;NEAREST=NEK10;INTRON=8/16
rs1013673	3:27206003	C	ENSG00000163491	ENST00000357467	Transcript	intron_variant	-	-	-	-	-	-	IMPACT=MODIFIER;STRAND=-1;SYMBOL=NEK10;SYMBOL_SOURCE=HGNC;HGNC_ID=18592;NEAREST=NEK10;INTRON=11/12
rs1013673	3:27206003	C	ENSG00000163491	ENST00000383770	Transcript	intron_variant	-	-	-	-	-	-	IMPACT=MODIFIER;STRAND=-1;SYMBOL=NEK10;SYMBOL_SOURCE=HGNC;HGNC_ID=18592;NEAREST=NEK10;INTRON=8/14
rs1013673	3:27206003	C	ENSG00000163491	ENST00000383771	Transcript	intron_variant	-	-	-	-	-	-	IMPACT=MODIFIER;STRAND=-1;SYMBOL=NEK10;SYMBOL_SOURCE=HGNC;HGNC_ID=18592;NEAREST=NEK10;INTRON=8/15
rs1013673	3:27206003	C	ENSG00000163491	ENST00000429845	Transcript	intron_variant	-	-	-	-	-	-	IMPACT=MODIFIER;STRAND=-1;SYMBOL=NEK10;SYMBOL_SOURCE=HGNC;HGNC_ID=18592;NEAREST=NEK10;INTRON=30/38
rs1013673	3:27206003	C	ENSG00000163491	ENST00000498182	Transcript	intron_variant,non_coding_transcript_variant	-	-	-	-	-	-	IMPACT=MODIFIER;STRAND=-1;SYMBOL=NEK10;SYMBOL_SOURCE=HGNC;HGNC_ID=18592;NEAREST=NEK10;INTRON=5/7
rs1013673	3:27206003	C	ENSG00000163491	ENST00000574215	Transcript	intron_variant,non_coding_transcript_variant	-	-	-	-	-	-	IMPACT=MODIFIER;STRAND=-1;SYMBOL=NEK10;SYMBOL_SOURCE=HGNC;HGNC_ID=18592;NEAREST=NEK10;INTRON=12/13
rs7618042	3:27207700	T	ENSG00000163491	ENST00000295720	Transcript	intron_variant	-	-	-	-	-	-	IMPACT=MODIFIER;STRAND=-1;SYMBOL=NEK10;SYMBOL_SOURCE=HGNC;HGNC_ID=18592;NEAREST=NEK10;INTRON=8/16
rs7618042	3:27207700	T	ENSG00000163491	ENST00000357467	Transcript	intron_variant	-	-	-	-	-	-	IMPACT=MODIFIER;STRAND=-1;SYMBOL=NEK10;SYMBOL_SOURCE=HGNC;HGNC_ID=18592;NEAREST=NEK10;INTRON=11/12
rs7618042	3:27207700	T	ENSG00000163491	ENST00000383770	Transcript	intron_variant	-	-	-	-	-	-	IMPACT=MODIFIER;STRAND=-1;SYMBOL=NEK10;SYMBOL_SOURCE=HGNC;HGNC_ID=18592;NEAREST=NEK10;INTRON=8/14
rs7618042	3:27207700	T	ENSG00000163491	ENST00000383771	Transcript	intron_variant	-	-	-	-	-	-	IMPACT=MODIFIER;STRAND=-1;SYMBOL=NEK10;SYMBOL_SOURCE=HGNC;HGNC_ID=18592;NEAREST=NEK10;INTRON=8/15
rs7618042	3:27207700	T	ENSG00000163491	ENST00000429845	Transcript	intron_variant	-	-	-	-	-	-	IMPACT=MODIFIER;STRAND=-1;SYMBOL=NEK10;SYMBOL_SOURCE=HGNC;HGNC_ID=18592;NEAREST=NEK10;INTRON=30/38
rs7618042	3:27207700	T	ENSG00000163491	ENST00000498182	Transcript	intron_variant,non_coding_transcript_variant	-	-	-	-	-	-	IMPACT=MODIFIER;STRAND=-1;SYMBOL=NEK10;SYMBOL_SOURCE=HGNC;HGNC_ID=18592;NEAREST=NEK10;INTRON=5/7
rs7618042	3:27207700	T	ENSG00000163491	ENST00000574215	Transcript	intron_variant,non_coding_transcript_variant	-	-	-	-	-	-	IMPACT=MODIFIER;STRAND=-1;SYMBOL=NEK10;SYMBOL_SOURCE=HGNC;HGNC_ID=18592;NEAREST=NEK10;INTRON=12/13
rs7641830	3:27208003	A	ENSG00000163491	ENST00000295720	Transcript	intron_variant	-	-	-	-	-	-	IMPACT=MODIFIER;STRAND=-1;SYMBOL=NEK10;SYMBOL_SOURCE=HGNC;HGNC_ID=18592;NEAREST=NEK10;INTRON=8/16
rs7641830	3:27208003	A	ENSG00000163491	ENST00000357467	Transcript	intron_variant	-	-	-	-	-	-	IMPACT=MODIFIER;STRAND=-1;SYMBOL=NEK10;SYMBOL_SOURCE=HGNC;HGNC_ID=18592;NEAREST=NEK10;INTRON=11/12
rs7641830	3:27208003	A	ENSG00000163491	ENST00000383770	Transcript	intron_variant	-	-	-	-	-	-	IMPACT=MODIFIER;STRAND=-1;SYMBOL=NEK10;SYMBOL_SOURCE=HGNC;HGNC_ID=18592;NEAREST=NEK10;INTRON=8/14
rs7641830	3:27208003	A	ENSG00000163491	ENST00000383771	Transcript	intron_variant	-	-	-	-	-	-	IMPACT=MODIFIER;STRAND=-1;SYMBOL=NEK10;SYMBOL_SOURCE=HGNC;HGNC_ID=18592;NEAREST=NEK10;INTRON=8/15
rs7641830	3:27208003	A	ENSG00000163491	ENST00000429845	Transcript	intron_variant	-	-	-	-	-	-	IMPACT=MODIFIER;STRAND=-1;SYMBOL=NEK10;SYMBOL_SOURCE=HGNC;HGNC_ID=18592;NEAREST=NEK10;INTRON=30/38
rs7641830	3:27208003	A	ENSG00000163491	ENST00000498182	Transcript	intron_variant,non_coding_transcript_variant	-	-	-	-	-	-	IMPACT=MODIFIER;STRAND=-1;SYMBOL=NEK10;SYMBOL_SOURCE=HGNC;HGNC_ID=18592;NEAREST=NEK10;INTRON=5/7
rs7641830	3:27208003	A	ENSG00000163491	ENST00000574215	Transcript	intron_variant,non_coding_transcript_variant	-	-	-	-	-	-	IMPACT=MODIFIER;STRAND=-1;SYMBOL=NEK10;SYMBOL_SOURCE=HGNC;HGNC_ID=18592;NEAREST=NEK10;INTRON=12/13
rs12487340	3:27208975	T	ENSG00000163491	ENST00000295720	Transcript	intron_variant	-	-	-	-	-	-	IMPACT=MODIFIER;STRAND=-1;SYMBOL=NEK10;SYMBOL_SOURCE=HGNC;HGNC_ID=18592;NEAREST=NEK10;INTRON=8/16
rs12487340	3:27208975	T	ENSG00000163491	ENST00000357467	Transcript	intron_variant	-	-	-	-	-	-	IMPACT=MODIFIER;STRAND=-1;SYMBOL=NEK10;SYMBOL_SOURCE=HGNC;HGNC_ID=18592;NEAREST=NEK10;INTRON=11/12
rs12487340	3:27208975	T	ENSG00000163491	ENST00000383770	Transcript	intron_variant	-	-	-	-	-	-	IMPACT=MODIFIER;STRAND=-1;SYMBOL=NEK10;SYMBOL_SOURCE=HGNC;HGNC_ID=18592;NEAREST=NEK10;INTRON=8/14
rs12487340	3:27208975	T	ENSG00000163491	ENST00000383771	Transcript	intron_variant	-	-	-	-	-	-	IMPACT=MODIFIER;STRAND=-1;SYMBOL=NEK10;SYMBOL_SOURCE=HGNC;HGNC_ID=18592;NEAREST=NEK10;INTRON=8/15
rs12487340	3:27208975	T	ENSG00000163491	ENST00000429845	Transcript	intron_variant	-	-	-	-	-	-	IMPACT=MODIFIER;STRAND=-1;SYMBOL=NEK10;SYMBOL_SOURCE=HGNC;HGNC_ID=18592;NEAREST=NEK10;INTRON=30/38
rs12487340	3:27208975	T	ENSG00000163491	ENST00000498182	Transcript	intron_variant,non_coding_transcript_variant	-	-	-	-	-	-	IMPACT=MODIFIER;STRAND=-1;SYMBOL=NEK10;SYMBOL_SOURCE=HGNC;HGNC_ID=18592;NEAREST=NEK10;INTRON=5/7
rs12487340	3:27208975	T	ENSG00000163491	ENST00000574215	Transcript	intron_variant,non_coding_transcript_variant	-	-	-	-	-	-	IMPACT=MODIFIER;STRAND=-1;SYMBOL=NEK10;SYMBOL_SOURCE=HGNC;HGNC_ID=18592;NEAREST=NEK10;INTRON=12/13
rs7653795	3:27217080	A	ENSG00000163491	ENST00000295720	Transcript	intron_variant	-	-	-	-	-	-	IMPACT=MODIFIER;STRAND=-1;SYMBOL=NEK10;SYMBOL_SOURCE=HGNC;HGNC_ID=18592;NEAREST=NEK10;INTRON=5/16
rs7653795	3:27217080	A	ENSG00000163491	ENST00000357467	Transcript	intron_variant	-	-	-	-	-	-	IMPACT=MODIFIER;STRAND=-1;SYMBOL=NEK10;SYMBOL_SOURCE=HGNC;HGNC_ID=18592;NEAREST=NEK10;INTRON=8/12
rs7653795	3:27217080	A	ENSG00000163491	ENST00000383770	Transcript	intron_variant	-	-	-	-	-	-	IMPACT=MODIFIER;STRAND=-1;SYMBOL=NEK10;SYMBOL_SOURCE=HGNC;HGNC_ID=18592;NEAREST=NEK10;INTRON=5/14
rs7653795	3:27217080	A	ENSG00000163491	ENST00000383771	Transcript	intron_variant	-	-	-	-	-	-	IMPACT=MODIFIER;STRAND=-1;SYMBOL=NEK10;SYMBOL_SOURCE=HGNC;HGNC_ID=18592;NEAREST=NEK10;INTRON=5/15
rs7653795	3:27217080	A	ENSG00000163491	ENST00000429845	Transcript	intron_variant	-	-	-	-	-	-	IMPACT=MODIFIER;STRAND=-1;SYMBOL=NEK10;SYMBOL_SOURCE=HGNC;HGNC_ID=18592;NEAREST=NEK10;INTRON=27/38
rs7653795	3:27217080	A	ENSG00000163491	ENST00000460447	Transcript	intron_variant,non_coding_transcript_variant	-	-	-	-	-	-	IMPACT=MODIFIER;STRAND=-1;SYMBOL=NEK10;SYMBOL_SOURCE=HGNC;HGNC_ID=18592;NEAREST=NEK10;INTRON=2/3
rs7653795	3:27217080	A	ENSG00000163491	ENST00000498182	Transcript	intron_variant,non_coding_transcript_variant	-	-	-	-	-	-	IMPACT=MODIFIER;STRAND=-1;SYMBOL=NEK10;SYMBOL_SOURCE=HGNC;HGNC_ID=18592;NEAREST=NEK10;INTRON=2/7
rs7653795	3:27217080	A	ENSG00000163491	ENST00000574215	Transcript	intron_variant,non_coding_transcript_variant	-	-	-	-	-	-	IMPACT=MODIFIER;STRAND=-1;SYMBOL=NEK10;SYMBOL_SOURCE=HGNC;HGNC_ID=18592;NEAREST=NEK10;INTRON=9/13
rs12715119	3:27221769	C	ENSG00000163491	ENST00000295720	Transcript	intron_variant	-	-	-	-	-	-	IMPACT=MODIFIER;STRAND=-1;SYMBOL=NEK10;SYMBOL_SOURCE=HGNC;HGNC_ID=18592;NEAREST=NEK10;INTRON=5/16
rs12715119	3:27221769	C	ENSG00000163491	ENST00000357467	Transcript	intron_variant	-	-	-	-	-	-	IMPACT=MODIFIER;STRAND=-1;SYMBOL=NEK10;SYMBOL_SOURCE=HGNC;HGNC_ID=18592;NEAREST=NEK10;INTRON=8/12
rs12715119	3:27221769	C	ENSG00000163491	ENST00000383770	Transcript	intron_variant	-	-	-	-	-	-	IMPACT=MODIFIER;STRAND=-1;SYMBOL=NEK10;SYMBOL_SOURCE=HGNC;HGNC_ID=18592;NEAREST=NEK10;INTRON=5/14
rs12715119	3:27221769	C	ENSG00000163491	ENST00000383771	Transcript	intron_variant	-	-	-	-	-	-	IMPACT=MODIFIER;STRAND=-1;SYMBOL=NEK10;SYMBOL_SOURCE=HGNC;HGNC_ID=18592;NEAREST=NEK10;INTRON=5/15
rs12715119	3:27221769	C	ENSG00000163491	ENST00000429845	Transcript	intron_variant	-	-	-	-	-	-	IMPACT=MODIFIER;STRAND=-1;SYMBOL=NEK10;SYMBOL_SOURCE=HGNC;HGNC_ID=18592;NEAREST=NEK10;INTRON=27/38
rs12715119	3:27221769	C	ENSG00000163491	ENST00000460447	Transcript	intron_variant,non_coding_transcript_variant	-	-	-	-	-	-	IMPACT=MODIFIER;STRAND=-1;SYMBOL=NEK10;SYMBOL_SOURCE=HGNC;HGNC_ID=18592;NEAREST=NEK10;INTRON=2/3
rs12715119	3:27221769	C	ENSG00000163491	ENST00000498182	Transcript	intron_variant,non_coding_transcript_variant	-	-	-	-	-	-	IMPACT=MODIFIER;STRAND=-1;SYMBOL=NEK10;SYMBOL_SOURCE=HGNC;HGNC_ID=18592;NEAREST=NEK10;INTRON=2/7
rs12715119	3:27221769	C	ENSG00000163491	ENST00000574215	Transcript	intron_variant,non_coding_transcript_variant	-	-	-	-	-	-	IMPACT=MODIFIER;STRAND=-1;SYMBOL=NEK10;SYMBOL_SOURCE=HGNC;HGNC_ID=18592;NEAREST=NEK10;INTRON=9/13
rs9858306	3:27222542	G	ENSG00000163491	ENST00000295720	Transcript	intron_variant	-	-	-	-	-	-	IMPACT=MODIFIER;STRAND=-1;SYMBOL=NEK10;SYMBOL_SOURCE=HGNC;HGNC_ID=18592;NEAREST=NEK10;INTRON=5/16
rs9858306	3:27222542	G	ENSG00000163491	ENST00000357467	Transcript	intron_variant	-	-	-	-	-	-	IMPACT=MODIFIER;STRAND=-1;SYMBOL=NEK10;SYMBOL_SOURCE=HGNC;HGNC_ID=18592;NEAREST=NEK10;INTRON=8/12
rs9858306	3:27222542	G	ENSG00000163491	ENST00000383770	Transcript	intron_variant	-	-	-	-	-	-	IMPACT=MODIFIER;STRAND=-1;SYMBOL=NEK10;SYMBOL_SOURCE=HGNC;HGNC_ID=18592;NEAREST=NEK10;INTRON=5/14
rs9858306	3:27222542	G	ENSG00000163491	ENST00000383771	Transcript	intron_variant	-	-	-	-	-	-	IMPACT=MODIFIER;STRAND=-1;SYMBOL=NEK10;SYMBOL_SOURCE=HGNC;HGNC_ID=18592;NEAREST=NEK10;INTRON=5/15
rs9858306	3:27222542	G	ENSG00000163491	ENST00000429845	Transcript	intron_variant	-	-	-	-	-	-	IMPACT=MODIFIER;STRAND=-1;SYMBOL=NEK10;SYMBOL_SOURCE=HGNC;HGNC_ID=18592;NEAREST=NEK10;INTRON=27/38
rs9858306	3:27222542	G	ENSG00000163491	ENST00000460447	Transcript	intron_variant,non_coding_transcript_variant	-	-	-	-	-	-	IMPACT=MODIFIER;STRAND=-1;SYMBOL=NEK10;SYMBOL_SOURCE=HGNC;HGNC_ID=18592;NEAREST=NEK10;INTRON=2/3
rs9858306	3:27222542	G	ENSG00000163491	ENST00000498182	Transcript	intron_variant,non_coding_transcript_variant	-	-	-	-	-	-	IMPACT=MODIFIER;STRAND=-1;SYMBOL=NEK10;SYMBOL_SOURCE=HGNC;HGNC_ID=18592;NEAREST=NEK10;INTRON=2/7
rs9858306	3:27222542	G	ENSG00000163491	ENST00000574215	Transcript	intron_variant,non_coding_transcript_variant	-	-	-	-	-	-	IMPACT=MODIFIER;STRAND=-1;SYMBOL=NEK10;SYMBOL_SOURCE=HGNC;HGNC_ID=18592;NEAREST=NEK10;INTRON=9/13
rs7634574	3:27223319	A	ENSG00000163491	ENST00000295720	Transcript	intron_variant	-	-	-	-	-	-	IMPACT=MODIFIER;STRAND=-1;SYMBOL=NEK10;SYMBOL_SOURCE=HGNC;HGNC_ID=18592;NEAREST=NEK10;INTRON=5/16
rs7634574	3:27223319	A	ENSG00000163491	ENST00000357467	Transcript	intron_variant	-	-	-	-	-	-	IMPACT=MODIFIER;STRAND=-1;SYMBOL=NEK10;SYMBOL_SOURCE=HGNC;HGNC_ID=18592;NEAREST=NEK10;INTRON=8/12
rs7634574	3:27223319	A	ENSG00000163491	ENST00000383770	Transcript	intron_variant	-	-	-	-	-	-	IMPACT=MODIFIER;STRAND=-1;SYMBOL=NEK10;SYMBOL_SOURCE=HGNC;HGNC_ID=18592;NEAREST=NEK10;INTRON=5/14
rs7634574	3:27223319	A	ENSG00000163491	ENST00000383771	Transcript	intron_variant	-	-	-	-	-	-	IMPACT=MODIFIER;STRAND=-1;SYMBOL=NEK10;SYMBOL_SOURCE=HGNC;HGNC_ID=18592;NEAREST=NEK10;INTRON=5/15
rs7634574	3:27223319	A	ENSG00000163491	ENST00000429845	Transcript	intron_variant	-	-	-	-	-	-	IMPACT=MODIFIER;STRAND=-1;SYMBOL=NEK10;SYMBOL_SOURCE=HGNC;HGNC_ID=18592;NEAREST=NEK10;INTRON=27/38
rs7634574	3:27223319	A	ENSG00000163491	ENST00000460447	Transcript	intron_variant,non_coding_transcript_variant	-	-	-	-	-	-	IMPACT=MODIFIER;STRAND=-1;SYMBOL=NEK10;SYMBOL_SOURCE=HGNC;HGNC_ID=18592;NEAREST=NEK10;INTRON=2/3
rs7634574	3:27223319	A	ENSG00000163491	ENST00000498182	Transcript	intron_variant,non_coding_transcript_variant	-	-	-	-	-	-	IMPACT=MODIFIER;STRAND=-1;SYMBOL=NEK10;SYMBOL_SOURCE=HGNC;HGNC_ID=18592;NEAREST=NEK10;INTRON=2/7
rs7634574	3:27223319	A	ENSG00000163491	ENST00000574215	Transcript	intron_variant,non_coding_transcript_variant	-	-	-	-	-	-	IMPACT=MODIFIER;STRAND=-1;SYMBOL=NEK10;SYMBOL_SOURCE=HGNC;HGNC_ID=18592;NEAREST=NEK10;INTRON=9/13
rs9848482	3:27224050	A	ENSG00000163491	ENST00000295720	Transcript	intron_variant	-	-	-	-	-	-	IMPACT=MODIFIER;STRAND=-1;SYMBOL=NEK10;SYMBOL_SOURCE=HGNC;HGNC_ID=18592;NEAREST=NEK10;INTRON=5/16
rs9848482	3:27224050	A	ENSG00000163491	ENST00000357467	Transcript	intron_variant	-	-	-	-	-	-	IMPACT=MODIFIER;STRAND=-1;SYMBOL=NEK10;SYMBOL_SOURCE=HGNC;HGNC_ID=18592;NEAREST=NEK10;INTRON=8/12
rs9848482	3:27224050	A	ENSG00000163491	ENST00000383770	Transcript	intron_variant	-	-	-	-	-	-	IMPACT=MODIFIER;STRAND=-1;SYMBOL=NEK10;SYMBOL_SOURCE=HGNC;HGNC_ID=18592;NEAREST=NEK10;INTRON=5/14
rs9848482	3:27224050	A	ENSG00000163491	ENST00000383771	Transcript	intron_variant	-	-	-	-	-	-	IMPACT=MODIFIER;STRAND=-1;SYMBOL=NEK10;SYMBOL_SOURCE=HGNC;HGNC_ID=18592;NEAREST=NEK10;INTRON=5/15
rs9848482	3:27224050	A	ENSG00000163491	ENST00000429845	Transcript	intron_variant	-	-	-	-	-	-	IMPACT=MODIFIER;STRAND=-1;SYMBOL=NEK10;SYMBOL_SOURCE=HGNC;HGNC_ID=18592;NEAREST=NEK10;INTRON=27/38
rs9848482	3:27224050	A	ENSG00000163491	ENST00000460447	Transcript	intron_variant,non_coding_transcript_variant	-	-	-	-	-	-	IMPACT=MODIFIER;STRAND=-1;SYMBOL=NEK10;SYMBOL_SOURCE=HGNC;HGNC_ID=18592;NEAREST=NEK10;INTRON=2/3
rs9848482	3:27224050	A	ENSG00000163491	ENST00000498182	Transcript	intron_variant,non_coding_transcript_variant	-	-	-	-	-	-	IMPACT=MODIFIER;STRAND=-1;SYMBOL=NEK10;SYMBOL_SOURCE=HGNC;HGNC_ID=18592;NEAREST=NEK10;INTRON=2/7
rs9848482	3:27224050	A	ENSG00000163491	ENST00000574215	Transcript	intron_variant,non_coding_transcript_variant	-	-	-	-	-	-	IMPACT=MODIFIER;STRAND=-1;SYMBOL=NEK10;SYMBOL_SOURCE=HGNC;HGNC_ID=18592;NEAREST=NEK10;INTRON=9/13
rs9832789	3:27228834	C	ENSG00000163491	ENST00000295720	Transcript	intron_variant	-	-	-	-	-	-	IMPACT=MODIFIER;STRAND=-1;SYMBOL=NEK10;SYMBOL_SOURCE=HGNC;HGNC_ID=18592;NEAREST=NEK10;INTRON=5/16
rs9832789	3:27228834	C	ENSG00000163491	ENST00000357467	Transcript	intron_variant	-	-	-	-	-	-	IMPACT=MODIFIER;STRAND=-1;SYMBOL=NEK10;SYMBOL_SOURCE=HGNC;HGNC_ID=18592;NEAREST=NEK10;INTRON=8/12
rs9832789	3:27228834	C	ENSG00000163491	ENST00000383770	Transcript	intron_variant	-	-	-	-	-	-	IMPACT=MODIFIER;STRAND=-1;SYMBOL=NEK10;SYMBOL_SOURCE=HGNC;HGNC_ID=18592;NEAREST=NEK10;INTRON=5/14
rs9832789	3:27228834	C	ENSG00000163491	ENST00000383771	Transcript	intron_variant	-	-	-	-	-	-	IMPACT=MODIFIER;STRAND=-1;SYMBOL=NEK10;SYMBOL_SOURCE=HGNC;HGNC_ID=18592;NEAREST=NEK10;INTRON=5/15
rs9832789	3:27228834	C	ENSG00000163491	ENST00000429845	Transcript	intron_variant	-	-	-	-	-	-	IMPACT=MODIFIER;STRAND=-1;SYMBOL=NEK10;SYMBOL_SOURCE=HGNC;HGNC_ID=18592;NEAREST=NEK10;INTRON=27/38
rs9832789	3:27228834	C	ENSG00000163491	ENST00000460447	Transcript	intron_variant,non_coding_transcript_variant	-	-	-	-	-	-	IMPACT=MODIFIER;STRAND=-1;SYMBOL=NEK10;SYMBOL_SOURCE=HGNC;HGNC_ID=18592;NEAREST=NEK10;INTRON=2/3
rs9832789	3:27228834	C	ENSG00000163491	ENST00000498182	Transcript	intron_variant,non_coding_transcript_variant	-	-	-	-	-	-	IMPACT=MODIFIER;STRAND=-1;SYMBOL=NEK10;SYMBOL_SOURCE=HGNC;HGNC_ID=18592;NEAREST=NEK10;INTRON=2/7
rs9832789	3:27228834	C	ENSG00000163491	ENST00000574215	Transcript	intron_variant,non_coding_transcript_variant	-	-	-	-	-	-	IMPACT=MODIFIER;STRAND=-1;SYMBOL=NEK10;SYMBOL_SOURCE=HGNC;HGNC_ID=18592;NEAREST=NEK10;INTRON=9/13
rs6551176	3:27230587	G	ENSG00000163491	ENST00000295720	Transcript	intron_variant	-	-	-	-	-	-	IMPACT=MODIFIER;STRAND=-1;SYMBOL=NEK10;SYMBOL_SOURCE=HGNC;HGNC_ID=18592;NEAREST=NEK10;INTRON=5/16
rs6551176	3:27230587	G	ENSG00000163491	ENST00000357467	Transcript	intron_variant	-	-	-	-	-	-	IMPACT=MODIFIER;STRAND=-1;SYMBOL=NEK10;SYMBOL_SOURCE=HGNC;HGNC_ID=18592;NEAREST=NEK10;INTRON=8/12
rs6551176	3:27230587	G	ENSG00000163491	ENST00000383770	Transcript	intron_variant	-	-	-	-	-	-	IMPACT=MODIFIER;STRAND=-1;SYMBOL=NEK10;SYMBOL_SOURCE=HGNC;HGNC_ID=18592;NEAREST=NEK10;INTRON=5/14
rs6551176	3:27230587	G	ENSG00000163491	ENST00000383771	Transcript	intron_variant	-	-	-	-	-	-	IMPACT=MODIFIER;STRAND=-1;SYMBOL=NEK10;SYMBOL_SOURCE=HGNC;HGNC_ID=18592;NEAREST=NEK10;INTRON=5/15
rs6551176	3:27230587	G	ENSG00000163491	ENST00000429845	Transcript	intron_variant	-	-	-	-	-	-	IMPACT=MODIFIER;STRAND=-1;SYMBOL=NEK10;SYMBOL_SOURCE=HGNC;HGNC_ID=18592;NEAREST=NEK10;INTRON=27/38
rs6551176	3:27230587	G	ENSG00000163491	ENST00000460447	Transcript	intron_variant,non_coding_transcript_variant	-	-	-	-	-	-	IMPACT=MODIFIER;STRAND=-1;SYMBOL=NEK10;SYMBOL_SOURCE=HGNC;HGNC_ID=18592;NEAREST=NEK10;INTRON=2/3
rs6551176	3:27230587	G	ENSG00000163491	ENST00000498182	Transcript	intron_variant,non_coding_transcript_variant	-	-	-	-	-	-	IMPACT=MODIFIER;STRAND=-1;SYMBOL=NEK10;SYMBOL_SOURCE=HGNC;HGNC_ID=18592;NEAREST=NEK10;INTRON=2/7
rs6551176	3:27230587	G	ENSG00000163491	ENST00000574215	Transcript	intron_variant,non_coding_transcript_variant	-	-	-	-	-	-	IMPACT=MODIFIER;STRAND=-1;SYMBOL=NEK10;SYMBOL_SOURCE=HGNC;HGNC_ID=18592;NEAREST=NEK10;INTRON=9/13
rs1445108	3:27231558	A	ENSG00000163491	ENST00000295720	Transcript	intron_variant	-	-	-	-	-	-	IMPACT=MODIFIER;STRAND=-1;SYMBOL=NEK10;SYMBOL_SOURCE=HGNC;HGNC_ID=18592;NEAREST=NEK10;INTRON=5/16
rs1445108	3:27231558	A	ENSG00000163491	ENST00000357467	Transcript	intron_variant	-	-	-	-	-	-	IMPACT=MODIFIER;STRAND=-1;SYMBOL=NEK10;SYMBOL_SOURCE=HGNC;HGNC_ID=18592;NEAREST=NEK10;INTRON=8/12
rs1445108	3:27231558	A	ENSG00000163491	ENST00000383770	Transcript	intron_variant	-	-	-	-	-	-	IMPACT=MODIFIER;STRAND=-1;SYMBOL=NEK10;SYMBOL_SOURCE=HGNC;HGNC_ID=18592;NEAREST=NEK10;INTRON=5/14
rs1445108	3:27231558	A	ENSG00000163491	ENST00000383771	Transcript	intron_variant	-	-	-	-	-	-	IMPACT=MODIFIER;STRAND=-1;SYMBOL=NEK10;SYMBOL_SOURCE=HGNC;HGNC_ID=18592;NEAREST=NEK10;INTRON=5/15
rs1445108	3:27231558	A	ENSG00000163491	ENST00000429845	Transcript	intron_variant	-	-	-	-	-	-	IMPACT=MODIFIER;STRAND=-1;SYMBOL=NEK10;SYMBOL_SOURCE=HGNC;HGNC_ID=18592;NEAREST=NEK10;INTRON=27/38
rs1445108	3:27231558	A	ENSG00000163491	ENST00000460447	Transcript	intron_variant,non_coding_transcript_variant	-	-	-	-	-	-	IMPACT=MODIFIER;STRAND=-1;SYMBOL=NEK10;SYMBOL_SOURCE=HGNC;HGNC_ID=18592;NEAREST=NEK10;INTRON=2/3
rs1445108	3:27231558	A	ENSG00000163491	ENST00000498182	Transcript	intron_variant,non_coding_transcript_variant	-	-	-	-	-	-	IMPACT=MODIFIER;STRAND=-1;SYMBOL=NEK10;SYMBOL_SOURCE=HGNC;HGNC_ID=18592;NEAREST=NEK10;INTRON=2/7
rs1445108	3:27231558	A	ENSG00000163491	ENST00000574215	Transcript	intron_variant,non_coding_transcript_variant	-	-	-	-	-	-	IMPACT=MODIFIER;STRAND=-1;SYMBOL=NEK10;SYMBOL_SOURCE=HGNC;HGNC_ID=18592;NEAREST=NEK10;INTRON=9/13
rs6551179	3:27236385	T	ENSG00000163491	ENST00000295720	Transcript	intron_variant	-	-	-	-	-	-	IMPACT=MODIFIER;STRAND=-1;SYMBOL=NEK10;SYMBOL_SOURCE=HGNC;HGNC_ID=18592;NEAREST=NEK10;INTRON=4/16
rs6551179	3:27236385	T	ENSG00000163491	ENST00000357467	Transcript	intron_variant	-	-	-	-	-	-	IMPACT=MODIFIER;STRAND=-1;SYMBOL=NEK10;SYMBOL_SOURCE=HGNC;HGNC_ID=18592;NEAREST=NEK10;INTRON=7/12
rs6551179	3:27236385	T	ENSG00000163491	ENST00000383770	Transcript	intron_variant	-	-	-	-	-	-	IMPACT=MODIFIER;STRAND=-1;SYMBOL=NEK10;SYMBOL_SOURCE=HGNC;HGNC_ID=18592;NEAREST=NEK10;INTRON=4/14
rs6551179	3:27236385	T	ENSG00000163491	ENST00000383771	Transcript	intron_variant	-	-	-	-	-	-	IMPACT=MODIFIER;STRAND=-1;SYMBOL=NEK10;SYMBOL_SOURCE=HGNC;HGNC_ID=18592;NEAREST=NEK10;INTRON=4/15
rs6551179	3:27236385	T	ENSG00000163491	ENST00000429845	Transcript	intron_variant	-	-	-	-	-	-	IMPACT=MODIFIER;STRAND=-1;SYMBOL=NEK10;SYMBOL_SOURCE=HGNC;HGNC_ID=18592;NEAREST=NEK10;INTRON=26/38
rs6551179	3:27236385	T	ENSG00000163491	ENST00000460447	Transcript	upstream_gene_variant	-	-	-	-	-	-	IMPACT=MODIFIER;DISTANCE=663;STRAND=-1;SYMBOL=NEK10;SYMBOL_SOURCE=HGNC;HGNC_ID=18592;NEAREST=NEK10
rs6551179	3:27236385	T	ENSG00000163491	ENST00000498182	Transcript	upstream_gene_variant	-	-	-	-	-	-	IMPACT=MODIFIER;DISTANCE=218;STRAND=-1;SYMBOL=NEK10;SYMBOL_SOURCE=HGNC;HGNC_ID=18592;NEAREST=NEK10
rs6551179	3:27236385	T	ENSG00000163491	ENST00000574215	Transcript	intron_variant,non_coding_transcript_variant	-	-	-	-	-	-	IMPACT=MODIFIER;STRAND=-1;SYMBOL=NEK10;SYMBOL_SOURCE=HGNC;HGNC_ID=18592;NEAREST=NEK10;INTRON=8/13
rs7620772	3:27238349	G	ENSG00000163491	ENST00000295720	Transcript	intron_variant	-	-	-	-	-	-	IMPACT=MODIFIER;STRAND=-1;SYMBOL=NEK10;SYMBOL_SOURCE=HGNC;HGNC_ID=18592;NEAREST=NEK10;INTRON=4/16
rs7620772	3:27238349	G	ENSG00000163491	ENST00000357467	Transcript	intron_variant	-	-	-	-	-	-	IMPACT=MODIFIER;STRAND=-1;SYMBOL=NEK10;SYMBOL_SOURCE=HGNC;HGNC_ID=18592;NEAREST=NEK10;INTRON=7/12
rs7620772	3:27238349	G	ENSG00000163491	ENST00000383770	Transcript	intron_variant	-	-	-	-	-	-	IMPACT=MODIFIER;STRAND=-1;SYMBOL=NEK10;SYMBOL_SOURCE=HGNC;HGNC_ID=18592;NEAREST=NEK10;INTRON=4/14
rs7620772	3:27238349	G	ENSG00000163491	ENST00000383771	Transcript	intron_variant	-	-	-	-	-	-	IMPACT=MODIFIER;STRAND=-1;SYMBOL=NEK10;SYMBOL_SOURCE=HGNC;HGNC_ID=18592;NEAREST=NEK10;INTRON=4/15
rs7620772	3:27238349	G	ENSG00000163491	ENST00000429845	Transcript	intron_variant	-	-	-	-	-	-	IMPACT=MODIFIER;STRAND=-1;SYMBOL=NEK10;SYMBOL_SOURCE=HGNC;HGNC_ID=18592;NEAREST=NEK10;INTRON=26/38
rs7620772	3:27238349	G	ENSG00000163491	ENST00000460447	Transcript	upstream_gene_variant	-	-	-	-	-	-	IMPACT=MODIFIER;DISTANCE=2627;STRAND=-1;SYMBOL=NEK10;SYMBOL_SOURCE=HGNC;HGNC_ID=18592;NEAREST=NEK10
rs7620772	3:27238349	G	ENSG00000163491	ENST00000498182	Transcript	upstream_gene_variant	-	-	-	-	-	-	IMPACT=MODIFIER;DISTANCE=2182;STRAND=-1;SYMBOL=NEK10;SYMBOL_SOURCE=HGNC;HGNC_ID=18592;NEAREST=NEK10
rs7620772	3:27238349	G	ENSG00000163491	ENST00000574215	Transcript	intron_variant,non_coding_transcript_variant	-	-	-	-	-	-	IMPACT=MODIFIER;STRAND=-1;SYMBOL=NEK10;SYMBOL_SOURCE=HGNC;HGNC_ID=18592;NEAREST=NEK10;INTRON=8/13
rs9820391	3:27238725	A	ENSG00000163491	ENST00000295720	Transcript	intron_variant	-	-	-	-	-	-	IMPACT=MODIFIER;STRAND=-1;SYMBOL=NEK10;SYMBOL_SOURCE=HGNC;HGNC_ID=18592;NEAREST=NEK10;INTRON=4/16
rs9820391	3:27238725	A	ENSG00000163491	ENST00000357467	Transcript	intron_variant	-	-	-	-	-	-	IMPACT=MODIFIER;STRAND=-1;SYMBOL=NEK10;SYMBOL_SOURCE=HGNC;HGNC_ID=18592;NEAREST=NEK10;INTRON=7/12
rs9820391	3:27238725	A	ENSG00000163491	ENST00000383770	Transcript	intron_variant	-	-	-	-	-	-	IMPACT=MODIFIER;STRAND=-1;SYMBOL=NEK10;SYMBOL_SOURCE=HGNC;HGNC_ID=18592;NEAREST=NEK10;INTRON=4/14
rs9820391	3:27238725	A	ENSG00000163491	ENST00000383771	Transcript	intron_variant	-	-	-	-	-	-	IMPACT=MODIFIER;STRAND=-1;SYMBOL=NEK10;SYMBOL_SOURCE=HGNC;HGNC_ID=18592;NEAREST=NEK10;INTRON=4/15
rs9820391	3:27238725	A	ENSG00000163491	ENST00000429845	Transcript	intron_variant	-	-	-	-	-	-	IMPACT=MODIFIER;STRAND=-1;SYMBOL=NEK10;SYMBOL_SOURCE=HGNC;HGNC_ID=18592;NEAREST=NEK10;INTRON=26/38
rs9820391	3:27238725	A	ENSG00000163491	ENST00000460447	Transcript	upstream_gene_variant	-	-	-	-	-	-	IMPACT=MODIFIER;DISTANCE=3003;STRAND=-1;SYMBOL=NEK10;SYMBOL_SOURCE=HGNC;HGNC_ID=18592;NEAREST=NEK10
rs9820391	3:27238725	A	ENSG00000163491	ENST00000498182	Transcript	upstream_gene_variant	-	-	-	-	-	-	IMPACT=MODIFIER;DISTANCE=2558;STRAND=-1;SYMBOL=NEK10;SYMBOL_SOURCE=HGNC;HGNC_ID=18592;NEAREST=NEK10
rs9820391	3:27238725	A	ENSG00000163491	ENST00000574215	Transcript	intron_variant,non_coding_transcript_variant	-	-	-	-	-	-	IMPACT=MODIFIER;STRAND=-1;SYMBOL=NEK10;SYMBOL_SOURCE=HGNC;HGNC_ID=18592;NEAREST=NEK10;INTRON=8/13
rs7634878	3:27241219	A	ENSG00000163491	ENST00000295720	Transcript	intron_variant	-	-	-	-	-	-	IMPACT=MODIFIER;STRAND=-1;SYMBOL=NEK10;SYMBOL_SOURCE=HGNC;HGNC_ID=18592;NEAREST=NEK10;INTRON=4/16
rs7634878	3:27241219	A	ENSG00000163491	ENST00000357467	Transcript	intron_variant	-	-	-	-	-	-	IMPACT=MODIFIER;STRAND=-1;SYMBOL=NEK10;SYMBOL_SOURCE=HGNC;HGNC_ID=18592;NEAREST=NEK10;INTRON=7/12
rs7634878	3:27241219	A	ENSG00000163491	ENST00000383770	Transcript	intron_variant	-	-	-	-	-	-	IMPACT=MODIFIER;STRAND=-1;SYMBOL=NEK10;SYMBOL_SOURCE=HGNC;HGNC_ID=18592;NEAREST=NEK10;INTRON=4/14
rs7634878	3:27241219	A	ENSG00000163491	ENST00000383771	Transcript	intron_variant	-	-	-	-	-	-	IMPACT=MODIFIER;STRAND=-1;SYMBOL=NEK10;SYMBOL_SOURCE=HGNC;HGNC_ID=18592;NEAREST=NEK10;INTRON=4/15
rs7634878	3:27241219	A	ENSG00000163491	ENST00000429845	Transcript	intron_variant	-	-	-	-	-	-	IMPACT=MODIFIER;STRAND=-1;SYMBOL=NEK10;SYMBOL_SOURCE=HGNC;HGNC_ID=18592;NEAREST=NEK10;INTRON=26/38
rs7634878	3:27241219	A	ENSG00000163491	ENST00000574215	Transcript	intron_variant,non_coding_transcript_variant	-	-	-	-	-	-	IMPACT=MODIFIER;STRAND=-1;SYMBOL=NEK10;SYMBOL_SOURCE=HGNC;HGNC_ID=18592;NEAREST=NEK10;INTRON=8/13
rs10049490	3:27241776	T	ENSG00000163491	ENST00000295720	Transcript	intron_variant	-	-	-	-	-	-	IMPACT=MODIFIER;STRAND=-1;SYMBOL=NEK10;SYMBOL_SOURCE=HGNC;HGNC_ID=18592;NEAREST=NEK10;INTRON=4/16
rs10049490	3:27241776	T	ENSG00000163491	ENST00000357467	Transcript	intron_variant	-	-	-	-	-	-	IMPACT=MODIFIER;STRAND=-1;SYMBOL=NEK10;SYMBOL_SOURCE=HGNC;HGNC_ID=18592;NEAREST=NEK10;INTRON=7/12
rs10049490	3:27241776	T	ENSG00000163491	ENST00000383770	Transcript	intron_variant	-	-	-	-	-	-	IMPACT=MODIFIER;STRAND=-1;SYMBOL=NEK10;SYMBOL_SOURCE=HGNC;HGNC_ID=18592;NEAREST=NEK10;INTRON=4/14
rs10049490	3:27241776	T	ENSG00000163491	ENST00000383771	Transcript	intron_variant	-	-	-	-	-	-	IMPACT=MODIFIER;STRAND=-1;SYMBOL=NEK10;SYMBOL_SOURCE=HGNC;HGNC_ID=18592;NEAREST=NEK10;INTRON=4/15
rs10049490	3:27241776	T	ENSG00000163491	ENST00000429845	Transcript	intron_variant	-	-	-	-	-	-	IMPACT=MODIFIER;STRAND=-1;SYMBOL=NEK10;SYMBOL_SOURCE=HGNC;HGNC_ID=18592;NEAREST=NEK10;INTRON=26/38
rs10049490	3:27241776	T	ENSG00000163491	ENST00000574215	Transcript	intron_variant,non_coding_transcript_variant	-	-	-	-	-	-	IMPACT=MODIFIER;STRAND=-1;SYMBOL=NEK10;SYMBOL_SOURCE=HGNC;HGNC_ID=18592;NEAREST=NEK10;INTRON=8/13
rs11924009	3:27243567	G	ENSG00000163491	ENST00000295720	Transcript	intron_variant	-	-	-	-	-	-	IMPACT=MODIFIER;STRAND=-1;SYMBOL=NEK10;SYMBOL_SOURCE=HGNC;HGNC_ID=18592;NEAREST=NEK10;INTRON=3/16
rs11924009	3:27243567	G	ENSG00000163491	ENST00000357467	Transcript	intron_variant	-	-	-	-	-	-	IMPACT=MODIFIER;STRAND=-1;SYMBOL=NEK10;SYMBOL_SOURCE=HGNC;HGNC_ID=18592;NEAREST=NEK10;INTRON=6/12
rs11924009	3:27243567	G	ENSG00000163491	ENST00000383770	Transcript	intron_variant	-	-	-	-	-	-	IMPACT=MODIFIER;STRAND=-1;SYMBOL=NEK10;SYMBOL_SOURCE=HGNC;HGNC_ID=18592;NEAREST=NEK10;INTRON=3/14
rs11924009	3:27243567	G	ENSG00000163491	ENST00000383771	Transcript	intron_variant	-	-	-	-	-	-	IMPACT=MODIFIER;STRAND=-1;SYMBOL=NEK10;SYMBOL_SOURCE=HGNC;HGNC_ID=18592;NEAREST=NEK10;INTRON=3/15
rs11924009	3:27243567	G	ENSG00000163491	ENST00000429845	Transcript	intron_variant	-	-	-	-	-	-	IMPACT=MODIFIER;STRAND=-1;SYMBOL=NEK10;SYMBOL_SOURCE=HGNC;HGNC_ID=18592;NEAREST=NEK10;INTRON=25/38
rs11924009	3:27243567	G	ENSG00000163491	ENST00000574215	Transcript	intron_variant,non_coding_transcript_variant	-	-	-	-	-	-	IMPACT=MODIFIER;STRAND=-1;SYMBOL=NEK10;SYMBOL_SOURCE=HGNC;HGNC_ID=18592;NEAREST=NEK10;INTRON=7/13
rs4973756	3:27248190	T	ENSG00000163491	ENST00000295720	Transcript	intron_variant	-	-	-	-	-	-	IMPACT=MODIFIER;STRAND=-1;SYMBOL=NEK10;SYMBOL_SOURCE=HGNC;HGNC_ID=18592;NEAREST=NEK10;INTRON=2/16
rs4973756	3:27248190	T	ENSG00000163491	ENST00000357467	Transcript	intron_variant	-	-	-	-	-	-	IMPACT=MODIFIER;STRAND=-1;SYMBOL=NEK10;SYMBOL_SOURCE=HGNC;HGNC_ID=18592;NEAREST=NEK10;INTRON=5/12
rs4973756	3:27248190	T	ENSG00000163491	ENST00000383770	Transcript	intron_variant	-	-	-	-	-	-	IMPACT=MODIFIER;STRAND=-1;SYMBOL=NEK10;SYMBOL_SOURCE=HGNC;HGNC_ID=18592;NEAREST=NEK10;INTRON=2/14
rs4973756	3:27248190	T	ENSG00000163491	ENST00000383771	Transcript	intron_variant	-	-	-	-	-	-	IMPACT=MODIFIER;STRAND=-1;SYMBOL=NEK10;SYMBOL_SOURCE=HGNC;HGNC_ID=18592;NEAREST=NEK10;INTRON=2/15
rs4973756	3:27248190	T	ENSG00000163491	ENST00000429845	Transcript	intron_variant	-	-	-	-	-	-	IMPACT=MODIFIER;STRAND=-1;SYMBOL=NEK10;SYMBOL_SOURCE=HGNC;HGNC_ID=18592;NEAREST=NEK10;INTRON=24/38
rs4973756	3:27248190	T	ENSG00000163491	ENST00000574215	Transcript	intron_variant,non_coding_transcript_variant	-	-	-	-	-	-	IMPACT=MODIFIER;STRAND=-1;SYMBOL=NEK10;SYMBOL_SOURCE=HGNC;HGNC_ID=18592;NEAREST=NEK10;INTRON=6/13
rs7615829	3:27252196	G	ENSG00000163491	ENST00000295720	Transcript	intron_variant	-	-	-	-	-	-	IMPACT=MODIFIER;STRAND=-1;SYMBOL=NEK10;SYMBOL_SOURCE=HGNC;HGNC_ID=18592;NEAREST=NEK10;INTRON=2/16
rs7615829	3:27252196	G	ENSG00000163491	ENST00000341435	Transcript	downstream_gene_variant	-	-	-	-	-	-	IMPACT=MODIFIER;DISTANCE=4902;STRAND=-1;SYMBOL=NEK10;SYMBOL_SOURCE=HGNC;HGNC_ID=18592;NEAREST=NEK10
rs7615829	3:27252196	G	ENSG00000163491	ENST00000357467	Transcript	intron_variant	-	-	-	-	-	-	IMPACT=MODIFIER;STRAND=-1;SYMBOL=NEK10;SYMBOL_SOURCE=HGNC;HGNC_ID=18592;NEAREST=NEK10;INTRON=5/12
rs7615829	3:27252196	G	ENSG00000163491	ENST00000383770	Transcript	intron_variant	-	-	-	-	-	-	IMPACT=MODIFIER;STRAND=-1;SYMBOL=NEK10;SYMBOL_SOURCE=HGNC;HGNC_ID=18592;NEAREST=NEK10;INTRON=2/14
rs7615829	3:27252196	G	ENSG00000163491	ENST00000383771	Transcript	intron_variant	-	-	-	-	-	-	IMPACT=MODIFIER;STRAND=-1;SYMBOL=NEK10;SYMBOL_SOURCE=HGNC;HGNC_ID=18592;NEAREST=NEK10;INTRON=2/15
rs7615829	3:27252196	G	ENSG00000163491	ENST00000429845	Transcript	intron_variant	-	-	-	-	-	-	IMPACT=MODIFIER;STRAND=-1;SYMBOL=NEK10;SYMBOL_SOURCE=HGNC;HGNC_ID=18592;NEAREST=NEK10;INTRON=24/38
rs7615829	3:27252196	G	ENSG00000224237	ENST00000457048	Transcript	downstream_gene_variant	-	-	-	-	-	-	IMPACT=MODIFIER;DISTANCE=4111;STRAND=-1;SYMBOL=MINOS1P3;SYMBOL_SOURCE=HGNC;HGNC_ID=44093;NEAREST=NEK10
rs7615829	3:27252196	G	ENSG00000163491	ENST00000574215	Transcript	intron_variant,non_coding_transcript_variant	-	-	-	-	-	-	IMPACT=MODIFIER;STRAND=-1;SYMBOL=NEK10;SYMBOL_SOURCE=HGNC;HGNC_ID=18592;NEAREST=NEK10;INTRON=6/13
rs6551182	3:27252491	A	ENSG00000163491	ENST00000295720	Transcript	intron_variant	-	-	-	-	-	-	IMPACT=MODIFIER;STRAND=-1;SYMBOL=NEK10;SYMBOL_SOURCE=HGNC;HGNC_ID=18592;NEAREST=NEK10;INTRON=2/16
rs6551182	3:27252491	A	ENSG00000163491	ENST00000341435	Transcript	downstream_gene_variant	-	-	-	-	-	-	IMPACT=MODIFIER;DISTANCE=4607;STRAND=-1;SYMBOL=NEK10;SYMBOL_SOURCE=HGNC;HGNC_ID=18592;NEAREST=NEK10
rs6551182	3:27252491	A	ENSG00000163491	ENST00000357467	Transcript	intron_variant	-	-	-	-	-	-	IMPACT=MODIFIER;STRAND=-1;SYMBOL=NEK10;SYMBOL_SOURCE=HGNC;HGNC_ID=18592;NEAREST=NEK10;INTRON=5/12
rs6551182	3:27252491	A	ENSG00000163491	ENST00000383770	Transcript	intron_variant	-	-	-	-	-	-	IMPACT=MODIFIER;STRAND=-1;SYMBOL=NEK10;SYMBOL_SOURCE=HGNC;HGNC_ID=18592;NEAREST=NEK10;INTRON=2/14
rs6551182	3:27252491	A	ENSG00000163491	ENST00000383771	Transcript	intron_variant	-	-	-	-	-	-	IMPACT=MODIFIER;STRAND=-1;SYMBOL=NEK10;SYMBOL_SOURCE=HGNC;HGNC_ID=18592;NEAREST=NEK10;INTRON=2/15
rs6551182	3:27252491	A	ENSG00000163491	ENST00000429845	Transcript	intron_variant	-	-	-	-	-	-	IMPACT=MODIFIER;STRAND=-1;SYMBOL=NEK10;SYMBOL_SOURCE=HGNC;HGNC_ID=18592;NEAREST=NEK10;INTRON=24/38
rs6551182	3:27252491	A	ENSG00000224237	ENST00000457048	Transcript	downstream_gene_variant	-	-	-	-	-	-	IMPACT=MODIFIER;DISTANCE=3816;STRAND=-1;SYMBOL=MINOS1P3;SYMBOL_SOURCE=HGNC;HGNC_ID=44093;NEAREST=NEK10
rs6551182	3:27252491	A	ENSG00000163491	ENST00000574215	Transcript	intron_variant,non_coding_transcript_variant	-	-	-	-	-	-	IMPACT=MODIFIER;STRAND=-1;SYMBOL=NEK10;SYMBOL_SOURCE=HGNC;HGNC_ID=18592;NEAREST=NEK10;INTRON=6/13
rs1445111	3:27253971	T	ENSG00000163491	ENST00000295720	Transcript	intron_variant	-	-	-	-	-	-	IMPACT=MODIFIER;STRAND=-1;SYMBOL=NEK10;SYMBOL_SOURCE=HGNC;HGNC_ID=18592;NEAREST=NEK10;INTRON=2/16
rs1445111	3:27253971	T	ENSG00000163491	ENST00000341435	Transcript	downstream_gene_variant	-	-	-	-	-	-	IMPACT=MODIFIER;DISTANCE=3127;STRAND=-1;SYMBOL=NEK10;SYMBOL_SOURCE=HGNC;HGNC_ID=18592;NEAREST=NEK10
rs1445111	3:27253971	T	ENSG00000163491	ENST00000357467	Transcript	intron_variant	-	-	-	-	-	-	IMPACT=MODIFIER;STRAND=-1;SYMBOL=NEK10;SYMBOL_SOURCE=HGNC;HGNC_ID=18592;NEAREST=NEK10;INTRON=5/12
rs1445111	3:27253971	T	ENSG00000163491	ENST00000383770	Transcript	intron_variant	-	-	-	-	-	-	IMPACT=MODIFIER;STRAND=-1;SYMBOL=NEK10;SYMBOL_SOURCE=HGNC;HGNC_ID=18592;NEAREST=NEK10;INTRON=2/14
rs1445111	3:27253971	T	ENSG00000163491	ENST00000383771	Transcript	intron_variant	-	-	-	-	-	-	IMPACT=MODIFIER;STRAND=-1;SYMBOL=NEK10;SYMBOL_SOURCE=HGNC;HGNC_ID=18592;NEAREST=NEK10;INTRON=2/15
rs1445111	3:27253971	T	ENSG00000163491	ENST00000429845	Transcript	intron_variant	-	-	-	-	-	-	IMPACT=MODIFIER;STRAND=-1;SYMBOL=NEK10;SYMBOL_SOURCE=HGNC;HGNC_ID=18592;NEAREST=NEK10;INTRON=24/38
rs1445111	3:27253971	T	ENSG00000224237	ENST00000457048	Transcript	downstream_gene_variant	-	-	-	-	-	-	IMPACT=MODIFIER;DISTANCE=2336;STRAND=-1;SYMBOL=MINOS1P3;SYMBOL_SOURCE=HGNC;HGNC_ID=44093;NEAREST=NEK10
rs1445111	3:27253971	T	ENSG00000163491	ENST00000574215	Transcript	intron_variant,non_coding_transcript_variant	-	-	-	-	-	-	IMPACT=MODIFIER;STRAND=-1;SYMBOL=NEK10;SYMBOL_SOURCE=HGNC;HGNC_ID=18592;NEAREST=NEK10;INTRON=6/13
rs11129270	3:27257943	G	ENSG00000163491	ENST00000295720	Transcript	5_prime_UTR_variant	24	-	-	-	-	-	IMPACT=MODIFIER;STRAND=-1;SYMBOL=NEK10;SYMBOL_SOURCE=HGNC;HGNC_ID=18592;NEAREST=NEK10;EXON=1/17
rs11129270	3:27257943	G	ENSG00000163491	ENST00000341435	Transcript	intron_variant	-	-	-	-	-	-	IMPACT=MODIFIER;STRAND=-1;SYMBOL=NEK10;SYMBOL_SOURCE=HGNC;HGNC_ID=18592;NEAREST=NEK10;INTRON=24/24
rs11129270	3:27257943	G	ENSG00000163491	ENST00000357467	Transcript	intron_variant	-	-	-	-	-	-	IMPACT=MODIFIER;STRAND=-1;SYMBOL=NEK10;SYMBOL_SOURCE=HGNC;HGNC_ID=18592;NEAREST=NEK10;INTRON=5/12
rs11129270	3:27257943	G	ENSG00000163491	ENST00000383770	Transcript	5_prime_UTR_variant	24	-	-	-	-	-	IMPACT=MODIFIER;STRAND=-1;SYMBOL=NEK10;SYMBOL_SOURCE=HGNC;HGNC_ID=18592;NEAREST=NEK10;EXON=1/15
rs11129270	3:27257943	G	ENSG00000163491	ENST00000383771	Transcript	5_prime_UTR_variant	24	-	-	-	-	-	IMPACT=MODIFIER;STRAND=-1;SYMBOL=NEK10;SYMBOL_SOURCE=HGNC;HGNC_ID=18592;NEAREST=NEK10;EXON=1/16
rs11129270	3:27257943	G	ENSG00000163491	ENST00000429845	Transcript	intron_variant	-	-	-	-	-	-	IMPACT=MODIFIER;STRAND=-1;SYMBOL=NEK10;SYMBOL_SOURCE=HGNC;HGNC_ID=18592;NEAREST=NEK10;INTRON=24/38
rs11129270	3:27257943	G	ENSG00000224237	ENST00000457048	Transcript	upstream_gene_variant	-	-	-	-	-	-	IMPACT=MODIFIER;DISTANCE=1434;STRAND=-1;SYMBOL=MINOS1P3;SYMBOL_SOURCE=HGNC;HGNC_ID=44093;NEAREST=NEK10
rs11129270	3:27257943	G	ENSG00000163491	ENST00000574215	Transcript	intron_variant,non_coding_transcript_variant	-	-	-	-	-	-	IMPACT=MODIFIER;STRAND=-1;SYMBOL=NEK10;SYMBOL_SOURCE=HGNC;HGNC_ID=18592;NEAREST=NEK10;INTRON=6/13
rs13085724	3:27258758	T	ENSG00000163491	ENST00000295720	Transcript	upstream_gene_variant	-	-	-	-	-	-	IMPACT=MODIFIER;DISTANCE=792;STRAND=-1;SYMBOL=NEK10;SYMBOL_SOURCE=HGNC;HGNC_ID=18592;NEAREST=NEK10
rs13085724	3:27258758	T	ENSG00000163491	ENST00000341435	Transcript	intron_variant	-	-	-	-	-	-	IMPACT=MODIFIER;STRAND=-1;SYMBOL=NEK10;SYMBOL_SOURCE=HGNC;HGNC_ID=18592;NEAREST=NEK10;INTRON=24/24
rs13085724	3:27258758	T	ENSG00000163491	ENST00000357467	Transcript	intron_variant	-	-	-	-	-	-	IMPACT=MODIFIER;STRAND=-1;SYMBOL=NEK10;SYMBOL_SOURCE=HGNC;HGNC_ID=18592;NEAREST=NEK10;INTRON=5/12
rs13085724	3:27258758	T	ENSG00000163491	ENST00000383770	Transcript	upstream_gene_variant	-	-	-	-	-	-	IMPACT=MODIFIER;DISTANCE=792;STRAND=-1;SYMBOL=NEK10;SYMBOL_SOURCE=HGNC;HGNC_ID=18592;NEAREST=NEK10
rs13085724	3:27258758	T	ENSG00000163491	ENST00000383771	Transcript	upstream_gene_variant	-	-	-	-	-	-	IMPACT=MODIFIER;DISTANCE=792;STRAND=-1;SYMBOL=NEK10;SYMBOL_SOURCE=HGNC;HGNC_ID=18592;NEAREST=NEK10
rs13085724	3:27258758	T	ENSG00000163491	ENST00000429845	Transcript	intron_variant	-	-	-	-	-	-	IMPACT=MODIFIER;STRAND=-1;SYMBOL=NEK10;SYMBOL_SOURCE=HGNC;HGNC_ID=18592;NEAREST=NEK10;INTRON=24/38
rs13085724	3:27258758	T	ENSG00000224237	ENST00000457048	Transcript	upstream_gene_variant	-	-	-	-	-	-	IMPACT=MODIFIER;DISTANCE=2249;STRAND=-1;SYMBOL=MINOS1P3;SYMBOL_SOURCE=HGNC;HGNC_ID=44093;NEAREST=NEK10
rs13085724	3:27258758	T	ENSG00000163491	ENST00000574215	Transcript	intron_variant,non_coding_transcript_variant	-	-	-	-	-	-	IMPACT=MODIFIER;STRAND=-1;SYMBOL=NEK10;SYMBOL_SOURCE=HGNC;HGNC_ID=18592;NEAREST=NEK10;INTRON=6/13
rs13085724	3:27258758	T	-	ENSR00000149965	RegulatoryFeature	regulatory_region_variant	-	-	-	-	-	-	IMPACT=MODIFIER;NEAREST=NEK10;BIOTYPE=open_chromatin_region
rs2370946	3:27260283	A	ENSG00000163491	ENST00000295720	Transcript	upstream_gene_variant	-	-	-	-	-	-	IMPACT=MODIFIER;DISTANCE=2317;STRAND=-1;SYMBOL=NEK10;SYMBOL_SOURCE=HGNC;HGNC_ID=18592;NEAREST=NEK10
rs2370946	3:27260283	A	ENSG00000163491	ENST00000341435	Transcript	intron_variant	-	-	-	-	-	-	IMPACT=MODIFIER;STRAND=-1;SYMBOL=NEK10;SYMBOL_SOURCE=HGNC;HGNC_ID=18592;NEAREST=NEK10;INTRON=24/24
rs2370946	3:27260283	A	ENSG00000163491	ENST00000357467	Transcript	intron_variant	-	-	-	-	-	-	IMPACT=MODIFIER;STRAND=-1;SYMBOL=NEK10;SYMBOL_SOURCE=HGNC;HGNC_ID=18592;NEAREST=NEK10;INTRON=5/12
rs2370946	3:27260283	A	ENSG00000163491	ENST00000383770	Transcript	upstream_gene_variant	-	-	-	-	-	-	IMPACT=MODIFIER;DISTANCE=2317;STRAND=-1;SYMBOL=NEK10;SYMBOL_SOURCE=HGNC;HGNC_ID=18592;NEAREST=NEK10
rs2370946	3:27260283	A	ENSG00000163491	ENST00000383771	Transcript	upstream_gene_variant	-	-	-	-	-	-	IMPACT=MODIFIER;DISTANCE=2317;STRAND=-1;SYMBOL=NEK10;SYMBOL_SOURCE=HGNC;HGNC_ID=18592;NEAREST=NEK10
rs2370946	3:27260283	A	ENSG00000163491	ENST00000429845	Transcript	intron_variant	-	-	-	-	-	-	IMPACT=MODIFIER;STRAND=-1;SYMBOL=NEK10;SYMBOL_SOURCE=HGNC;HGNC_ID=18592;NEAREST=NEK10;INTRON=24/38
rs2370946	3:27260283	A	ENSG00000224237	ENST00000457048	Transcript	upstream_gene_variant	-	-	-	-	-	-	IMPACT=MODIFIER;DISTANCE=3774;STRAND=-1;SYMBOL=MINOS1P3;SYMBOL_SOURCE=HGNC;HGNC_ID=44093;NEAREST=NEK10
rs2370946	3:27260283	A	ENSG00000163491	ENST00000574215	Transcript	intron_variant,non_coding_transcript_variant	-	-	-	-	-	-	IMPACT=MODIFIER;STRAND=-1;SYMBOL=NEK10;SYMBOL_SOURCE=HGNC;HGNC_ID=18592;NEAREST=NEK10;INTRON=6/13
rs9842044	3:27263248	C	ENSG00000163491	ENST00000341435	Transcript	intron_variant	-	-	-	-	-	-	IMPACT=MODIFIER;STRAND=-1;SYMBOL=NEK10;SYMBOL_SOURCE=HGNC;HGNC_ID=18592;NEAREST=NEK10;INTRON=24/24
rs9842044	3:27263248	C	ENSG00000163491	ENST00000357467	Transcript	intron_variant	-	-	-	-	-	-	IMPACT=MODIFIER;STRAND=-1;SYMBOL=NEK10;SYMBOL_SOURCE=HGNC;HGNC_ID=18592;NEAREST=NEK10;INTRON=5/12
rs9842044	3:27263248	C	ENSG00000163491	ENST00000429845	Transcript	intron_variant	-	-	-	-	-	-	IMPACT=MODIFIER;STRAND=-1;SYMBOL=NEK10;SYMBOL_SOURCE=HGNC;HGNC_ID=18592;NEAREST=NEK10;INTRON=24/38
rs9842044	3:27263248	C	ENSG00000163491	ENST00000574215	Transcript	intron_variant,non_coding_transcript_variant	-	-	-	-	-	-	IMPACT=MODIFIER;STRAND=-1;SYMBOL=NEK10;SYMBOL_SOURCE=HGNC;HGNC_ID=18592;NEAREST=NEK10;INTRON=6/13
rs2004005	3:27266705	T	ENSG00000163491	ENST00000341435	Transcript	intron_variant	-	-	-	-	-	-	IMPACT=MODIFIER;STRAND=-1;SYMBOL=NEK10;SYMBOL_SOURCE=HGNC;HGNC_ID=18592;NEAREST=NEK10;INTRON=24/24
rs2004005	3:27266705	T	ENSG00000163491	ENST00000357467	Transcript	intron_variant	-	-	-	-	-	-	IMPACT=MODIFIER;STRAND=-1;SYMBOL=NEK10;SYMBOL_SOURCE=HGNC;HGNC_ID=18592;NEAREST=NEK10;INTRON=5/12
rs2004005	3:27266705	T	ENSG00000163491	ENST00000429845	Transcript	intron_variant	-	-	-	-	-	-	IMPACT=MODIFIER;STRAND=-1;SYMBOL=NEK10;SYMBOL_SOURCE=HGNC;HGNC_ID=18592;NEAREST=NEK10;INTRON=24/38
rs2004005	3:27266705	T	ENSG00000163491	ENST00000574215	Transcript	intron_variant,non_coding_transcript_variant	-	-	-	-	-	-	IMPACT=MODIFIER;STRAND=-1;SYMBOL=NEK10;SYMBOL_SOURCE=HGNC;HGNC_ID=18592;NEAREST=NEK10;INTRON=6/13
rs7626742	3:27268398	T	ENSG00000163491	ENST00000341435	Transcript	intron_variant	-	-	-	-	-	-	IMPACT=MODIFIER;STRAND=-1;SYMBOL=NEK10;SYMBOL_SOURCE=HGNC;HGNC_ID=18592;NEAREST=NEK10;INTRON=24/24
rs7626742	3:27268398	T	ENSG00000163491	ENST00000357467	Transcript	intron_variant	-	-	-	-	-	-	IMPACT=MODIFIER;STRAND=-1;SYMBOL=NEK10;SYMBOL_SOURCE=HGNC;HGNC_ID=18592;NEAREST=NEK10;INTRON=5/12
rs7626742	3:27268398	T	ENSG00000163491	ENST00000429845	Transcript	intron_variant	-	-	-	-	-	-	IMPACT=MODIFIER;STRAND=-1;SYMBOL=NEK10;SYMBOL_SOURCE=HGNC;HGNC_ID=18592;NEAREST=NEK10;INTRON=24/38
rs7626742	3:27268398	T	ENSG00000163491	ENST00000574215	Transcript	intron_variant,non_coding_transcript_variant	-	-	-	-	-	-	IMPACT=MODIFIER;STRAND=-1;SYMBOL=NEK10;SYMBOL_SOURCE=HGNC;HGNC_ID=18592;NEAREST=NEK10;INTRON=6/13
rs6787882	3:27270459	C	ENSG00000163491	ENST00000341435	Transcript	intron_variant	-	-	-	-	-	-	IMPACT=MODIFIER;STRAND=-1;SYMBOL=NEK10;SYMBOL_SOURCE=HGNC;HGNC_ID=18592;NEAREST=NEK10;INTRON=24/24
rs6787882	3:27270459	C	ENSG00000163491	ENST00000357467	Transcript	intron_variant	-	-	-	-	-	-	IMPACT=MODIFIER;STRAND=-1;SYMBOL=NEK10;SYMBOL_SOURCE=HGNC;HGNC_ID=18592;NEAREST=NEK10;INTRON=5/12
rs6787882	3:27270459	C	ENSG00000163491	ENST00000429845	Transcript	intron_variant	-	-	-	-	-	-	IMPACT=MODIFIER;STRAND=-1;SYMBOL=NEK10;SYMBOL_SOURCE=HGNC;HGNC_ID=18592;NEAREST=NEK10;INTRON=24/38
rs6787882	3:27270459	C	ENSG00000163491	ENST00000574215	Transcript	intron_variant,non_coding_transcript_variant	-	-	-	-	-	-	IMPACT=MODIFIER;STRAND=-1;SYMBOL=NEK10;SYMBOL_SOURCE=HGNC;HGNC_ID=18592;NEAREST=NEK10;INTRON=6/13
rs6787882	3:27270459	C	-	ENSR00000303168	RegulatoryFeature	regulatory_region_variant	-	-	-	-	-	-	IMPACT=MODIFIER;NEAREST=NEK10;BIOTYPE=CTCF_binding_site
rs2120890	3:27271224	T	ENSG00000163491	ENST00000341435	Transcript	intron_variant	-	-	-	-	-	-	IMPACT=MODIFIER;STRAND=-1;SYMBOL=NEK10;SYMBOL_SOURCE=HGNC;HGNC_ID=18592;NEAREST=NEK10;INTRON=24/24
rs2120890	3:27271224	T	ENSG00000163491	ENST00000357467	Transcript	intron_variant	-	-	-	-	-	-	IMPACT=MODIFIER;STRAND=-1;SYMBOL=NEK10;SYMBOL_SOURCE=HGNC;HGNC_ID=18592;NEAREST=NEK10;INTRON=5/12
rs2120890	3:27271224	T	ENSG00000163491	ENST00000429845	Transcript	intron_variant	-	-	-	-	-	-	IMPACT=MODIFIER;STRAND=-1;SYMBOL=NEK10;SYMBOL_SOURCE=HGNC;HGNC_ID=18592;NEAREST=NEK10;INTRON=24/38
rs2120890	3:27271224	T	ENSG00000163491	ENST00000574215	Transcript	intron_variant,non_coding_transcript_variant	-	-	-	-	-	-	IMPACT=MODIFIER;STRAND=-1;SYMBOL=NEK10;SYMBOL_SOURCE=HGNC;HGNC_ID=18592;NEAREST=NEK10;INTRON=6/13
rs2100006	3:27273415	A	ENSG00000163491	ENST00000341435	Transcript	intron_variant	-	-	-	-	-	-	IMPACT=MODIFIER;STRAND=-1;SYMBOL=NEK10;SYMBOL_SOURCE=HGNC;HGNC_ID=18592;NEAREST=NEK10;INTRON=24/24
rs2100006	3:27273415	A	ENSG00000163491	ENST00000357467	Transcript	intron_variant	-	-	-	-	-	-	IMPACT=MODIFIER;STRAND=-1;SYMBOL=NEK10;SYMBOL_SOURCE=HGNC;HGNC_ID=18592;NEAREST=NEK10;INTRON=5/12
rs2100006	3:27273415	A	ENSG00000163491	ENST00000429845	Transcript	intron_variant	-	-	-	-	-	-	IMPACT=MODIFIER;STRAND=-1;SYMBOL=NEK10;SYMBOL_SOURCE=HGNC;HGNC_ID=18592;NEAREST=NEK10;INTRON=24/38
rs2100006	3:27273415	A	ENSG00000163491	ENST00000574215	Transcript	intron_variant,non_coding_transcript_variant	-	-	-	-	-	-	IMPACT=MODIFIER;STRAND=-1;SYMBOL=NEK10;SYMBOL_SOURCE=HGNC;HGNC_ID=18592;NEAREST=NEK10;INTRON=6/13
rs6551183	3:27281198	T	ENSG00000163491	ENST00000341435	Transcript	intron_variant	-	-	-	-	-	-	IMPACT=MODIFIER;STRAND=-1;SYMBOL=NEK10;SYMBOL_SOURCE=HGNC;HGNC_ID=18592;NEAREST=NEK10;INTRON=24/24
rs6551183	3:27281198	T	ENSG00000163491	ENST00000357467	Transcript	intron_variant	-	-	-	-	-	-	IMPACT=MODIFIER;STRAND=-1;SYMBOL=NEK10;SYMBOL_SOURCE=HGNC;HGNC_ID=18592;NEAREST=NEK10;INTRON=5/12
rs6551183	3:27281198	T	ENSG00000163491	ENST00000429845	Transcript	intron_variant	-	-	-	-	-	-	IMPACT=MODIFIER;STRAND=-1;SYMBOL=NEK10;SYMBOL_SOURCE=HGNC;HGNC_ID=18592;NEAREST=NEK10;INTRON=24/38
rs6551183	3:27281198	T	ENSG00000163491	ENST00000574215	Transcript	intron_variant,non_coding_transcript_variant	-	-	-	-	-	-	IMPACT=MODIFIER;STRAND=-1;SYMBOL=NEK10;SYMBOL_SOURCE=HGNC;HGNC_ID=18592;NEAREST=NEK10;INTRON=6/13
rs6779140	3:27285151	T	ENSG00000163491	ENST00000341435	Transcript	intron_variant	-	-	-	-	-	-	IMPACT=MODIFIER;STRAND=-1;SYMBOL=NEK10;SYMBOL_SOURCE=HGNC;HGNC_ID=18592;NEAREST=NEK10;INTRON=24/24
rs6779140	3:27285151	T	ENSG00000163491	ENST00000357467	Transcript	intron_variant	-	-	-	-	-	-	IMPACT=MODIFIER;STRAND=-1;SYMBOL=NEK10;SYMBOL_SOURCE=HGNC;HGNC_ID=18592;NEAREST=NEK10;INTRON=5/12
rs6779140	3:27285151	T	ENSG00000163491	ENST00000429845	Transcript	intron_variant	-	-	-	-	-	-	IMPACT=MODIFIER;STRAND=-1;SYMBOL=NEK10;SYMBOL_SOURCE=HGNC;HGNC_ID=18592;NEAREST=NEK10;INTRON=24/38
rs6779140	3:27285151	T	ENSG00000163491	ENST00000574215	Transcript	intron_variant,non_coding_transcript_variant	-	-	-	-	-	-	IMPACT=MODIFIER;STRAND=-1;SYMBOL=NEK10;SYMBOL_SOURCE=HGNC;HGNC_ID=18592;NEAREST=NEK10;INTRON=6/13
rs2370942	3:27286810	C	ENSG00000163491	ENST00000341435	Transcript	intron_variant	-	-	-	-	-	-	IMPACT=MODIFIER;STRAND=-1;SYMBOL=NEK10;SYMBOL_SOURCE=HGNC;HGNC_ID=18592;NEAREST=NEK10;INTRON=24/24
rs2370942	3:27286810	C	ENSG00000163491	ENST00000357467	Transcript	intron_variant	-	-	-	-	-	-	IMPACT=MODIFIER;STRAND=-1;SYMBOL=NEK10;SYMBOL_SOURCE=HGNC;HGNC_ID=18592;NEAREST=NEK10;INTRON=5/12
rs2370942	3:27286810	C	ENSG00000163491	ENST00000429845	Transcript	intron_variant	-	-	-	-	-	-	IMPACT=MODIFIER;STRAND=-1;SYMBOL=NEK10;SYMBOL_SOURCE=HGNC;HGNC_ID=18592;NEAREST=NEK10;INTRON=24/38
rs2370942	3:27286810	C	ENSG00000163491	ENST00000574215	Transcript	intron_variant,non_coding_transcript_variant	-	-	-	-	-	-	IMPACT=MODIFIER;STRAND=-1;SYMBOL=NEK10;SYMBOL_SOURCE=HGNC;HGNC_ID=18592;NEAREST=NEK10;INTRON=6/13
rs2034190	3:27292557	C	ENSG00000163491	ENST00000341435	Transcript	intron_variant	-	-	-	-	-	-	IMPACT=MODIFIER;STRAND=-1;SYMBOL=NEK10;SYMBOL_SOURCE=HGNC;HGNC_ID=18592;NEAREST=NEK10;INTRON=24/24
rs2034190	3:27292557	C	ENSG00000163491	ENST00000357467	Transcript	intron_variant	-	-	-	-	-	-	IMPACT=MODIFIER;STRAND=-1;SYMBOL=NEK10;SYMBOL_SOURCE=HGNC;HGNC_ID=18592;NEAREST=NEK10;INTRON=5/12
rs2034190	3:27292557	C	ENSG00000163491	ENST00000424275	Transcript	downstream_gene_variant	-	-	-	-	-	-	IMPACT=MODIFIER;DISTANCE=4046;STRAND=-1;FLAGS=cds_start_NF;SYMBOL=NEK10;SYMBOL_SOURCE=HGNC;HGNC_ID=18592;NEAREST=NEK10
rs2034190	3:27292557	C	ENSG00000163491	ENST00000429845	Transcript	intron_variant	-	-	-	-	-	-	IMPACT=MODIFIER;STRAND=-1;SYMBOL=NEK10;SYMBOL_SOURCE=HGNC;HGNC_ID=18592;NEAREST=NEK10;INTRON=24/38
rs2034190	3:27292557	C	ENSG00000163491	ENST00000435584	Transcript	downstream_gene_variant	-	-	-	-	-	-	IMPACT=MODIFIER;DISTANCE=4046;STRAND=-1;FLAGS=cds_start_NF;SYMBOL=NEK10;SYMBOL_SOURCE=HGNC;HGNC_ID=18592;NEAREST=NEK10
rs2034190	3:27292557	C	ENSG00000163491	ENST00000574215	Transcript	intron_variant,non_coding_transcript_variant	-	-	-	-	-	-	IMPACT=MODIFIER;STRAND=-1;SYMBOL=NEK10;SYMBOL_SOURCE=HGNC;HGNC_ID=18592;NEAREST=NEK10;INTRON=6/13
rs2370941	3:27292683	A	ENSG00000163491	ENST00000341435	Transcript	intron_variant	-	-	-	-	-	-	IMPACT=MODIFIER;STRAND=-1;SYMBOL=NEK10;SYMBOL_SOURCE=HGNC;HGNC_ID=18592;NEAREST=NEK10;INTRON=24/24
rs2370941	3:27292683	A	ENSG00000163491	ENST00000357467	Transcript	intron_variant	-	-	-	-	-	-	IMPACT=MODIFIER;STRAND=-1;SYMBOL=NEK10;SYMBOL_SOURCE=HGNC;HGNC_ID=18592;NEAREST=NEK10;INTRON=5/12
rs2370941	3:27292683	A	ENSG00000163491	ENST00000424275	Transcript	downstream_gene_variant	-	-	-	-	-	-	IMPACT=MODIFIER;DISTANCE=3920;STRAND=-1;FLAGS=cds_start_NF;SYMBOL=NEK10;SYMBOL_SOURCE=HGNC;HGNC_ID=18592;NEAREST=NEK10
rs2370941	3:27292683	A	ENSG00000163491	ENST00000429845	Transcript	intron_variant	-	-	-	-	-	-	IMPACT=MODIFIER;STRAND=-1;SYMBOL=NEK10;SYMBOL_SOURCE=HGNC;HGNC_ID=18592;NEAREST=NEK10;INTRON=24/38
rs2370941	3:27292683	A	ENSG00000163491	ENST00000435584	Transcript	downstream_gene_variant	-	-	-	-	-	-	IMPACT=MODIFIER;DISTANCE=3920;STRAND=-1;FLAGS=cds_start_NF;SYMBOL=NEK10;SYMBOL_SOURCE=HGNC;HGNC_ID=18592;NEAREST=NEK10
rs2370941	3:27292683	A	ENSG00000163491	ENST00000574215	Transcript	intron_variant,non_coding_transcript_variant	-	-	-	-	-	-	IMPACT=MODIFIER;STRAND=-1;SYMBOL=NEK10;SYMBOL_SOURCE=HGNC;HGNC_ID=18592;NEAREST=NEK10;INTRON=6/13
rs3213930	3:27297816	C	ENSG00000163491	ENST00000341435	Transcript	synonymous_variant	2335	2061	687	T	acC/acG	-	IMPACT=LOW;STRAND=-1;SYMBOL=NEK10;SYMBOL_SOURCE=HGNC;HGNC_ID=18592;NEAREST=NEK10;EXON=24/25
rs3213930	3:27297816	C	ENSG00000163491	ENST00000357467	Transcript	synonymous_variant	455	252	84	T	acC/acG	-	IMPACT=LOW;STRAND=-1;SYMBOL=NEK10;SYMBOL_SOURCE=HGNC;HGNC_ID=18592;NEAREST=NEK10;EXON=5/13
rs3213930	3:27297816	C	ENSG00000163491	ENST00000424275	Transcript	synonymous_variant	521	522	174	T	acC/acG	-	IMPACT=LOW;STRAND=-1;FLAGS=cds_start_NF;SYMBOL=NEK10;SYMBOL_SOURCE=HGNC;HGNC_ID=18592;NEAREST=NEK10;EXON=6/7
rs3213930	3:27297816	C	ENSG00000163491	ENST00000429845	Transcript	synonymous_variant	2424	2061	687	T	acC/acG	-	IMPACT=LOW;STRAND=-1;SYMBOL=NEK10;SYMBOL_SOURCE=HGNC;HGNC_ID=18592;NEAREST=NEK10;EXON=24/39
rs3213930	3:27297816	C	ENSG00000163491	ENST00000435584	Transcript	synonymous_variant	430	432	144	T	acC/acG	-	IMPACT=LOW;STRAND=-1;FLAGS=cds_start_NF;SYMBOL=NEK10;SYMBOL_SOURCE=HGNC;HGNC_ID=18592;NEAREST=NEK10;EXON=5/6
rs3213930	3:27297816	C	ENSG00000163491	ENST00000574215	Transcript	non_coding_transcript_exon_variant	457	-	-	-	-	-	IMPACT=MODIFIER;STRAND=-1;SYMBOL=NEK10;SYMBOL_SOURCE=HGNC;HGNC_ID=18592;NEAREST=NEK10;EXON=6/14
rs6551184	3:27299001	G	ENSG00000163491	ENST00000341435	Transcript	intron_variant	-	-	-	-	-	-	IMPACT=MODIFIER;STRAND=-1;SYMBOL=NEK10;SYMBOL_SOURCE=HGNC;HGNC_ID=18592;NEAREST=NEK10;INTRON=23/24
rs6551184	3:27299001	G	ENSG00000163491	ENST00000357467	Transcript	intron_variant	-	-	-	-	-	-	IMPACT=MODIFIER;STRAND=-1;SYMBOL=NEK10;SYMBOL_SOURCE=HGNC;HGNC_ID=18592;NEAREST=NEK10;INTRON=4/12
rs6551184	3:27299001	G	ENSG00000163491	ENST00000424275	Transcript	intron_variant	-	-	-	-	-	-	IMPACT=MODIFIER;STRAND=-1;FLAGS=cds_start_NF;SYMBOL=NEK10;SYMBOL_SOURCE=HGNC;HGNC_ID=18592;NEAREST=NEK10;INTRON=5/6
rs6551184	3:27299001	G	ENSG00000163491	ENST00000429845	Transcript	intron_variant	-	-	-	-	-	-	IMPACT=MODIFIER;STRAND=-1;SYMBOL=NEK10;SYMBOL_SOURCE=HGNC;HGNC_ID=18592;NEAREST=NEK10;INTRON=23/38
rs6551184	3:27299001	G	ENSG00000163491	ENST00000435584	Transcript	intron_variant	-	-	-	-	-	-	IMPACT=MODIFIER;STRAND=-1;FLAGS=cds_start_NF;SYMBOL=NEK10;SYMBOL_SOURCE=HGNC;HGNC_ID=18592;NEAREST=NEK10;INTRON=4/5
rs6551184	3:27299001	G	ENSG00000163491	ENST00000574215	Transcript	intron_variant,non_coding_transcript_variant	-	-	-	-	-	-	IMPACT=MODIFIER;STRAND=-1;SYMBOL=NEK10;SYMBOL_SOURCE=HGNC;HGNC_ID=18592;NEAREST=NEK10;INTRON=5/13
rs1899998	3:27307155	T	ENSG00000163491	ENST00000341435	Transcript	intron_variant	-	-	-	-	-	-	IMPACT=MODIFIER;STRAND=-1;SYMBOL=NEK10;SYMBOL_SOURCE=HGNC;HGNC_ID=18592;NEAREST=NEK10;INTRON=23/24
rs1899998	3:27307155	T	ENSG00000163491	ENST00000357467	Transcript	intron_variant	-	-	-	-	-	-	IMPACT=MODIFIER;STRAND=-1;SYMBOL=NEK10;SYMBOL_SOURCE=HGNC;HGNC_ID=18592;NEAREST=NEK10;INTRON=4/12
rs1899998	3:27307155	T	ENSG00000207251	ENST00000384521	Transcript	non_coding_transcript_exon_variant	20	-	-	-	-	-	IMPACT=MODIFIER;STRAND=-1;SYMBOL=RNU6-342P;SYMBOL_SOURCE=HGNC;HGNC_ID=47305;NEAREST=NEK10;EXON=1/1
rs1899998	3:27307155	T	ENSG00000163491	ENST00000424275	Transcript	intron_variant	-	-	-	-	-	-	IMPACT=MODIFIER;STRAND=-1;FLAGS=cds_start_NF;SYMBOL=NEK10;SYMBOL_SOURCE=HGNC;HGNC_ID=18592;NEAREST=NEK10;INTRON=5/6
rs1899998	3:27307155	T	ENSG00000163491	ENST00000429845	Transcript	intron_variant	-	-	-	-	-	-	IMPACT=MODIFIER;STRAND=-1;SYMBOL=NEK10;SYMBOL_SOURCE=HGNC;HGNC_ID=18592;NEAREST=NEK10;INTRON=23/38
rs1899998	3:27307155	T	ENSG00000163491	ENST00000435584	Transcript	intron_variant	-	-	-	-	-	-	IMPACT=MODIFIER;STRAND=-1;FLAGS=cds_start_NF;SYMBOL=NEK10;SYMBOL_SOURCE=HGNC;HGNC_ID=18592;NEAREST=NEK10;INTRON=4/5
rs1899998	3:27307155	T	ENSG00000163491	ENST00000574215	Transcript	intron_variant,non_coding_transcript_variant	-	-	-	-	-	-	IMPACT=MODIFIER;STRAND=-1;SYMBOL=NEK10;SYMBOL_SOURCE=HGNC;HGNC_ID=18592;NEAREST=NEK10;INTRON=5/13
rs1899997	3:27307196	G	ENSG00000163491	ENST00000341435	Transcript	intron_variant	-	-	-	-	-	-	IMPACT=MODIFIER;STRAND=-1;SYMBOL=NEK10;SYMBOL_SOURCE=HGNC;HGNC_ID=18592;NEAREST=NEK10;INTRON=23/24
rs1899997	3:27307196	G	ENSG00000163491	ENST00000357467	Transcript	intron_variant	-	-	-	-	-	-	IMPACT=MODIFIER;STRAND=-1;SYMBOL=NEK10;SYMBOL_SOURCE=HGNC;HGNC_ID=18592;NEAREST=NEK10;INTRON=4/12
rs1899997	3:27307196	G	ENSG00000207251	ENST00000384521	Transcript	upstream_gene_variant	-	-	-	-	-	-	IMPACT=MODIFIER;DISTANCE=22;STRAND=-1;SYMBOL=RNU6-342P;SYMBOL_SOURCE=HGNC;HGNC_ID=47305;NEAREST=NEK10
rs1899997	3:27307196	G	ENSG00000163491	ENST00000424275	Transcript	intron_variant	-	-	-	-	-	-	IMPACT=MODIFIER;STRAND=-1;FLAGS=cds_start_NF;SYMBOL=NEK10;SYMBOL_SOURCE=HGNC;HGNC_ID=18592;NEAREST=NEK10;INTRON=5/6
rs1899997	3:27307196	G	ENSG00000163491	ENST00000429845	Transcript	intron_variant	-	-	-	-	-	-	IMPACT=MODIFIER;STRAND=-1;SYMBOL=NEK10;SYMBOL_SOURCE=HGNC;HGNC_ID=18592;NEAREST=NEK10;INTRON=23/38
rs1899997	3:27307196	G	ENSG00000163491	ENST00000435584	Transcript	intron_variant	-	-	-	-	-	-	IMPACT=MODIFIER;STRAND=-1;FLAGS=cds_start_NF;SYMBOL=NEK10;SYMBOL_SOURCE=HGNC;HGNC_ID=18592;NEAREST=NEK10;INTRON=4/5
rs1899997	3:27307196	G	ENSG00000163491	ENST00000574215	Transcript	intron_variant,non_coding_transcript_variant	-	-	-	-	-	-	IMPACT=MODIFIER;STRAND=-1;SYMBOL=NEK10;SYMBOL_SOURCE=HGNC;HGNC_ID=18592;NEAREST=NEK10;INTRON=5/13
rs7622813	3:27309145	T	ENSG00000163491	ENST00000341435	Transcript	intron_variant	-	-	-	-	-	-	IMPACT=MODIFIER;STRAND=-1;SYMBOL=NEK10;SYMBOL_SOURCE=HGNC;HGNC_ID=18592;NEAREST=NEK10;INTRON=23/24
rs7622813	3:27309145	T	ENSG00000163491	ENST00000357467	Transcript	intron_variant	-	-	-	-	-	-	IMPACT=MODIFIER;STRAND=-1;SYMBOL=NEK10;SYMBOL_SOURCE=HGNC;HGNC_ID=18592;NEAREST=NEK10;INTRON=4/12
rs7622813	3:27309145	T	ENSG00000207251	ENST00000384521	Transcript	upstream_gene_variant	-	-	-	-	-	-	IMPACT=MODIFIER;DISTANCE=1971;STRAND=-1;SYMBOL=RNU6-342P;SYMBOL_SOURCE=HGNC;HGNC_ID=47305;NEAREST=NEK10
rs7622813	3:27309145	T	ENSG00000163491	ENST00000424275	Transcript	intron_variant	-	-	-	-	-	-	IMPACT=MODIFIER;STRAND=-1;FLAGS=cds_start_NF;SYMBOL=NEK10;SYMBOL_SOURCE=HGNC;HGNC_ID=18592;NEAREST=NEK10;INTRON=5/6
rs7622813	3:27309145	T	ENSG00000163491	ENST00000429845	Transcript	intron_variant	-	-	-	-	-	-	IMPACT=MODIFIER;STRAND=-1;SYMBOL=NEK10;SYMBOL_SOURCE=HGNC;HGNC_ID=18592;NEAREST=NEK10;INTRON=23/38
rs7622813	3:27309145	T	ENSG00000163491	ENST00000435584	Transcript	intron_variant	-	-	-	-	-	-	IMPACT=MODIFIER;STRAND=-1;FLAGS=cds_start_NF;SYMBOL=NEK10;SYMBOL_SOURCE=HGNC;HGNC_ID=18592;NEAREST=NEK10;INTRON=4/5
rs7622813	3:27309145	T	ENSG00000163491	ENST00000574215	Transcript	intron_variant,non_coding_transcript_variant	-	-	-	-	-	-	IMPACT=MODIFIER;STRAND=-1;SYMBOL=NEK10;SYMBOL_SOURCE=HGNC;HGNC_ID=18592;NEAREST=NEK10;INTRON=5/13
rs1579817	3:27310595	T	ENSG00000163491	ENST00000341435	Transcript	intron_variant	-	-	-	-	-	-	IMPACT=MODIFIER;STRAND=-1;SYMBOL=NEK10;SYMBOL_SOURCE=HGNC;HGNC_ID=18592;NEAREST=NEK10;INTRON=23/24
rs1579817	3:27310595	T	ENSG00000163491	ENST00000357467	Transcript	intron_variant	-	-	-	-	-	-	IMPACT=MODIFIER;STRAND=-1;SYMBOL=NEK10;SYMBOL_SOURCE=HGNC;HGNC_ID=18592;NEAREST=NEK10;INTRON=4/12
rs1579817	3:27310595	T	ENSG00000207251	ENST00000384521	Transcript	upstream_gene_variant	-	-	-	-	-	-	IMPACT=MODIFIER;DISTANCE=3421;STRAND=-1;SYMBOL=RNU6-342P;SYMBOL_SOURCE=HGNC;HGNC_ID=47305;NEAREST=NEK10
rs1579817	3:27310595	T	ENSG00000163491	ENST00000424275	Transcript	intron_variant	-	-	-	-	-	-	IMPACT=MODIFIER;STRAND=-1;FLAGS=cds_start_NF;SYMBOL=NEK10;SYMBOL_SOURCE=HGNC;HGNC_ID=18592;NEAREST=NEK10;INTRON=5/6
rs1579817	3:27310595	T	ENSG00000163491	ENST00000429845	Transcript	intron_variant	-	-	-	-	-	-	IMPACT=MODIFIER;STRAND=-1;SYMBOL=NEK10;SYMBOL_SOURCE=HGNC;HGNC_ID=18592;NEAREST=NEK10;INTRON=23/38
rs1579817	3:27310595	T	ENSG00000163491	ENST00000435584	Transcript	intron_variant	-	-	-	-	-	-	IMPACT=MODIFIER;STRAND=-1;FLAGS=cds_start_NF;SYMBOL=NEK10;SYMBOL_SOURCE=HGNC;HGNC_ID=18592;NEAREST=NEK10;INTRON=4/5
rs1579817	3:27310595	T	ENSG00000163491	ENST00000574215	Transcript	intron_variant,non_coding_transcript_variant	-	-	-	-	-	-	IMPACT=MODIFIER;STRAND=-1;SYMBOL=NEK10;SYMBOL_SOURCE=HGNC;HGNC_ID=18592;NEAREST=NEK10;INTRON=5/13
rs11711853	3:27317846	A	ENSG00000163491	ENST00000341435	Transcript	intron_variant	-	-	-	-	-	-	IMPACT=MODIFIER;STRAND=-1;SYMBOL=NEK10;SYMBOL_SOURCE=HGNC;HGNC_ID=18592;NEAREST=NEK10;INTRON=23/24
rs11711853	3:27317846	A	ENSG00000163491	ENST00000357467	Transcript	intron_variant	-	-	-	-	-	-	IMPACT=MODIFIER;STRAND=-1;SYMBOL=NEK10;SYMBOL_SOURCE=HGNC;HGNC_ID=18592;NEAREST=NEK10;INTRON=4/12
rs11711853	3:27317846	A	ENSG00000163491	ENST00000424275	Transcript	intron_variant	-	-	-	-	-	-	IMPACT=MODIFIER;STRAND=-1;FLAGS=cds_start_NF;SYMBOL=NEK10;SYMBOL_SOURCE=HGNC;HGNC_ID=18592;NEAREST=NEK10;INTRON=5/6
rs11711853	3:27317846	A	ENSG00000163491	ENST00000429845	Transcript	intron_variant	-	-	-	-	-	-	IMPACT=MODIFIER;STRAND=-1;SYMBOL=NEK10;SYMBOL_SOURCE=HGNC;HGNC_ID=18592;NEAREST=NEK10;INTRON=23/38
rs11711853	3:27317846	A	ENSG00000163491	ENST00000435584	Transcript	intron_variant	-	-	-	-	-	-	IMPACT=MODIFIER;STRAND=-1;FLAGS=cds_start_NF;SYMBOL=NEK10;SYMBOL_SOURCE=HGNC;HGNC_ID=18592;NEAREST=NEK10;INTRON=4/5
rs11711853	3:27317846	A	ENSG00000163491	ENST00000474938	Transcript	downstream_gene_variant	-	-	-	-	-	-	IMPACT=MODIFIER;DISTANCE=2333;STRAND=-1;SYMBOL=NEK10;SYMBOL_SOURCE=HGNC;HGNC_ID=18592;NEAREST=NEK10
rs11711853	3:27317846	A	ENSG00000163491	ENST00000574215	Transcript	intron_variant,non_coding_transcript_variant	-	-	-	-	-	-	IMPACT=MODIFIER;STRAND=-1;SYMBOL=NEK10;SYMBOL_SOURCE=HGNC;HGNC_ID=18592;NEAREST=NEK10;INTRON=5/13
rs9838558	3:27317858	G	ENSG00000163491	ENST00000341435	Transcript	intron_variant	-	-	-	-	-	-	IMPACT=MODIFIER;STRAND=-1;SYMBOL=NEK10;SYMBOL_SOURCE=HGNC;HGNC_ID=18592;NEAREST=NEK10;INTRON=23/24
rs9838558	3:27317858	G	ENSG00000163491	ENST00000357467	Transcript	intron_variant	-	-	-	-	-	-	IMPACT=MODIFIER;STRAND=-1;SYMBOL=NEK10;SYMBOL_SOURCE=HGNC;HGNC_ID=18592;NEAREST=NEK10;INTRON=4/12
rs9838558	3:27317858	G	ENSG00000163491	ENST00000424275	Transcript	intron_variant	-	-	-	-	-	-	IMPACT=MODIFIER;STRAND=-1;FLAGS=cds_start_NF;SYMBOL=NEK10;SYMBOL_SOURCE=HGNC;HGNC_ID=18592;NEAREST=NEK10;INTRON=5/6
rs9838558	3:27317858	G	ENSG00000163491	ENST00000429845	Transcript	intron_variant	-	-	-	-	-	-	IMPACT=MODIFIER;STRAND=-1;SYMBOL=NEK10;SYMBOL_SOURCE=HGNC;HGNC_ID=18592;NEAREST=NEK10;INTRON=23/38
rs9838558	3:27317858	G	ENSG00000163491	ENST00000435584	Transcript	intron_variant	-	-	-	-	-	-	IMPACT=MODIFIER;STRAND=-1;FLAGS=cds_start_NF;SYMBOL=NEK10;SYMBOL_SOURCE=HGNC;HGNC_ID=18592;NEAREST=NEK10;INTRON=4/5
rs9838558	3:27317858	G	ENSG00000163491	ENST00000474938	Transcript	downstream_gene_variant	-	-	-	-	-	-	IMPACT=MODIFIER;DISTANCE=2321;STRAND=-1;SYMBOL=NEK10;SYMBOL_SOURCE=HGNC;HGNC_ID=18592;NEAREST=NEK10
rs9838558	3:27317858	G	ENSG00000163491	ENST00000574215	Transcript	intron_variant,non_coding_transcript_variant	-	-	-	-	-	-	IMPACT=MODIFIER;STRAND=-1;SYMBOL=NEK10;SYMBOL_SOURCE=HGNC;HGNC_ID=18592;NEAREST=NEK10;INTRON=5/13
rs11914763	3:27319538	T	ENSG00000163491	ENST00000341435	Transcript	intron_variant	-	-	-	-	-	-	IMPACT=MODIFIER;STRAND=-1;SYMBOL=NEK10;SYMBOL_SOURCE=HGNC;HGNC_ID=18592;NEAREST=NEK10;INTRON=23/24
rs11914763	3:27319538	T	ENSG00000163491	ENST00000357467	Transcript	intron_variant	-	-	-	-	-	-	IMPACT=MODIFIER;STRAND=-1;SYMBOL=NEK10;SYMBOL_SOURCE=HGNC;HGNC_ID=18592;NEAREST=NEK10;INTRON=4/12
rs11914763	3:27319538	T	ENSG00000163491	ENST00000424275	Transcript	intron_variant	-	-	-	-	-	-	IMPACT=MODIFIER;STRAND=-1;FLAGS=cds_start_NF;SYMBOL=NEK10;SYMBOL_SOURCE=HGNC;HGNC_ID=18592;NEAREST=NEK10;INTRON=5/6
rs11914763	3:27319538	T	ENSG00000163491	ENST00000429845	Transcript	intron_variant	-	-	-	-	-	-	IMPACT=MODIFIER;STRAND=-1;SYMBOL=NEK10;SYMBOL_SOURCE=HGNC;HGNC_ID=18592;NEAREST=NEK10;INTRON=23/38
rs11914763	3:27319538	T	ENSG00000163491	ENST00000435584	Transcript	intron_variant	-	-	-	-	-	-	IMPACT=MODIFIER;STRAND=-1;FLAGS=cds_start_NF;SYMBOL=NEK10;SYMBOL_SOURCE=HGNC;HGNC_ID=18592;NEAREST=NEK10;INTRON=4/5
rs11914763	3:27319538	T	ENSG00000163491	ENST00000474938	Transcript	downstream_gene_variant	-	-	-	-	-	-	IMPACT=MODIFIER;DISTANCE=641;STRAND=-1;SYMBOL=NEK10;SYMBOL_SOURCE=HGNC;HGNC_ID=18592;NEAREST=NEK10
rs11914763	3:27319538	T	ENSG00000163491	ENST00000574215	Transcript	intron_variant,non_coding_transcript_variant	-	-	-	-	-	-	IMPACT=MODIFIER;STRAND=-1;SYMBOL=NEK10;SYMBOL_SOURCE=HGNC;HGNC_ID=18592;NEAREST=NEK10;INTRON=5/13
rs479566	3:27326999	C	ENSG00000163491	ENST00000341435	Transcript	intron_variant	-	-	-	-	-	-	IMPACT=MODIFIER;STRAND=-1;SYMBOL=NEK10;SYMBOL_SOURCE=HGNC;HGNC_ID=18592;NEAREST=NEK10;INTRON=21/24
rs479566	3:27326999	C	ENSG00000163491	ENST00000357467	Transcript	intron_variant	-	-	-	-	-	-	IMPACT=MODIFIER;STRAND=-1;SYMBOL=NEK10;SYMBOL_SOURCE=HGNC;HGNC_ID=18592;NEAREST=NEK10;INTRON=2/12
rs479566	3:27326999	C	ENSG00000163491	ENST00000424275	Transcript	intron_variant	-	-	-	-	-	-	IMPACT=MODIFIER;STRAND=-1;FLAGS=cds_start_NF;SYMBOL=NEK10;SYMBOL_SOURCE=HGNC;HGNC_ID=18592;NEAREST=NEK10;INTRON=3/6
rs479566	3:27326999	C	ENSG00000163491	ENST00000429845	Transcript	intron_variant	-	-	-	-	-	-	IMPACT=MODIFIER;STRAND=-1;SYMBOL=NEK10;SYMBOL_SOURCE=HGNC;HGNC_ID=18592;NEAREST=NEK10;INTRON=21/38
rs479566	3:27326999	C	ENSG00000163491	ENST00000435584	Transcript	intron_variant	-	-	-	-	-	-	IMPACT=MODIFIER;STRAND=-1;FLAGS=cds_start_NF;SYMBOL=NEK10;SYMBOL_SOURCE=HGNC;HGNC_ID=18592;NEAREST=NEK10;INTRON=2/5
rs479566	3:27326999	C	ENSG00000163491	ENST00000474938	Transcript	upstream_gene_variant	-	-	-	-	-	-	IMPACT=MODIFIER;DISTANCE=607;STRAND=-1;SYMBOL=NEK10;SYMBOL_SOURCE=HGNC;HGNC_ID=18592;NEAREST=NEK10
rs479566	3:27326999	C	ENSG00000163491	ENST00000574215	Transcript	intron_variant,non_coding_transcript_variant	-	-	-	-	-	-	IMPACT=MODIFIER;STRAND=-1;SYMBOL=NEK10;SYMBOL_SOURCE=HGNC;HGNC_ID=18592;NEAREST=NEK10;INTRON=3/13
rs481519	3:27327214	T	ENSG00000163491	ENST00000341435	Transcript	intron_variant	-	-	-	-	-	-	IMPACT=MODIFIER;STRAND=-1;SYMBOL=NEK10;SYMBOL_SOURCE=HGNC;HGNC_ID=18592;NEAREST=NEK10;INTRON=21/24
rs481519	3:27327214	T	ENSG00000163491	ENST00000357467	Transcript	intron_variant	-	-	-	-	-	-	IMPACT=MODIFIER;STRAND=-1;SYMBOL=NEK10;SYMBOL_SOURCE=HGNC;HGNC_ID=18592;NEAREST=NEK10;INTRON=2/12
rs481519	3:27327214	T	ENSG00000163491	ENST00000424275	Transcript	intron_variant	-	-	-	-	-	-	IMPACT=MODIFIER;STRAND=-1;FLAGS=cds_start_NF;SYMBOL=NEK10;SYMBOL_SOURCE=HGNC;HGNC_ID=18592;NEAREST=NEK10;INTRON=3/6
rs481519	3:27327214	T	ENSG00000163491	ENST00000429845	Transcript	intron_variant	-	-	-	-	-	-	IMPACT=MODIFIER;STRAND=-1;SYMBOL=NEK10;SYMBOL_SOURCE=HGNC;HGNC_ID=18592;NEAREST=NEK10;INTRON=21/38
rs481519	3:27327214	T	ENSG00000163491	ENST00000435584	Transcript	intron_variant	-	-	-	-	-	-	IMPACT=MODIFIER;STRAND=-1;FLAGS=cds_start_NF;SYMBOL=NEK10;SYMBOL_SOURCE=HGNC;HGNC_ID=18592;NEAREST=NEK10;INTRON=2/5
rs481519	3:27327214	T	ENSG00000163491	ENST00000474938	Transcript	upstream_gene_variant	-	-	-	-	-	-	IMPACT=MODIFIER;DISTANCE=822;STRAND=-1;SYMBOL=NEK10;SYMBOL_SOURCE=HGNC;HGNC_ID=18592;NEAREST=NEK10
rs481519	3:27327214	T	ENSG00000163491	ENST00000574215	Transcript	intron_variant,non_coding_transcript_variant	-	-	-	-	-	-	IMPACT=MODIFIER;STRAND=-1;SYMBOL=NEK10;SYMBOL_SOURCE=HGNC;HGNC_ID=18592;NEAREST=NEK10;INTRON=3/13
rs3103743	3:27327965	C	ENSG00000163491	ENST00000341435	Transcript	intron_variant	-	-	-	-	-	-	IMPACT=MODIFIER;STRAND=-1;SYMBOL=NEK10;SYMBOL_SOURCE=HGNC;HGNC_ID=18592;NEAREST=NEK10;INTRON=21/24
rs3103743	3:27327965	C	ENSG00000163491	ENST00000357467	Transcript	intron_variant	-	-	-	-	-	-	IMPACT=MODIFIER;STRAND=-1;SYMBOL=NEK10;SYMBOL_SOURCE=HGNC;HGNC_ID=18592;NEAREST=NEK10;INTRON=2/12
rs3103743	3:27327965	C	ENSG00000163491	ENST00000424275	Transcript	intron_variant	-	-	-	-	-	-	IMPACT=MODIFIER;STRAND=-1;FLAGS=cds_start_NF;SYMBOL=NEK10;SYMBOL_SOURCE=HGNC;HGNC_ID=18592;NEAREST=NEK10;INTRON=3/6
rs3103743	3:27327965	C	ENSG00000163491	ENST00000429845	Transcript	intron_variant	-	-	-	-	-	-	IMPACT=MODIFIER;STRAND=-1;SYMBOL=NEK10;SYMBOL_SOURCE=HGNC;HGNC_ID=18592;NEAREST=NEK10;INTRON=21/38
rs3103743	3:27327965	C	ENSG00000163491	ENST00000435584	Transcript	intron_variant	-	-	-	-	-	-	IMPACT=MODIFIER;STRAND=-1;FLAGS=cds_start_NF;SYMBOL=NEK10;SYMBOL_SOURCE=HGNC;HGNC_ID=18592;NEAREST=NEK10;INTRON=2/5
rs3103743	3:27327965	C	ENSG00000163491	ENST00000474938	Transcript	upstream_gene_variant	-	-	-	-	-	-	IMPACT=MODIFIER;DISTANCE=1573;STRAND=-1;SYMBOL=NEK10;SYMBOL_SOURCE=HGNC;HGNC_ID=18592;NEAREST=NEK10
rs3103743	3:27327965	C	ENSG00000163491	ENST00000574215	Transcript	intron_variant,non_coding_transcript_variant	-	-	-	-	-	-	IMPACT=MODIFIER;STRAND=-1;SYMBOL=NEK10;SYMBOL_SOURCE=HGNC;HGNC_ID=18592;NEAREST=NEK10;INTRON=3/13
rs487930	3:27330335	A	ENSG00000163491	ENST00000341435	Transcript	intron_variant	-	-	-	-	-	-	IMPACT=MODIFIER;STRAND=-1;SYMBOL=NEK10;SYMBOL_SOURCE=HGNC;HGNC_ID=18592;NEAREST=NEK10;INTRON=20/24
rs487930	3:27330335	A	ENSG00000163491	ENST00000357467	Transcript	intron_variant	-	-	-	-	-	-	IMPACT=MODIFIER;STRAND=-1;SYMBOL=NEK10;SYMBOL_SOURCE=HGNC;HGNC_ID=18592;NEAREST=NEK10;INTRON=1/12
rs487930	3:27330335	A	ENSG00000163491	ENST00000424275	Transcript	intron_variant	-	-	-	-	-	-	IMPACT=MODIFIER;STRAND=-1;FLAGS=cds_start_NF;SYMBOL=NEK10;SYMBOL_SOURCE=HGNC;HGNC_ID=18592;NEAREST=NEK10;INTRON=2/6
rs487930	3:27330335	A	ENSG00000163491	ENST00000429845	Transcript	intron_variant	-	-	-	-	-	-	IMPACT=MODIFIER;STRAND=-1;SYMBOL=NEK10;SYMBOL_SOURCE=HGNC;HGNC_ID=18592;NEAREST=NEK10;INTRON=20/38
rs487930	3:27330335	A	ENSG00000163491	ENST00000435584	Transcript	intron_variant	-	-	-	-	-	-	IMPACT=MODIFIER;STRAND=-1;FLAGS=cds_start_NF;SYMBOL=NEK10;SYMBOL_SOURCE=HGNC;HGNC_ID=18592;NEAREST=NEK10;INTRON=1/5
rs487930	3:27330335	A	ENSG00000163491	ENST00000474938	Transcript	upstream_gene_variant	-	-	-	-	-	-	IMPACT=MODIFIER;DISTANCE=3943;STRAND=-1;SYMBOL=NEK10;SYMBOL_SOURCE=HGNC;HGNC_ID=18592;NEAREST=NEK10
rs487930	3:27330335	A	ENSG00000163491	ENST00000574215	Transcript	intron_variant,non_coding_transcript_variant	-	-	-	-	-	-	IMPACT=MODIFIER;STRAND=-1;SYMBOL=NEK10;SYMBOL_SOURCE=HGNC;HGNC_ID=18592;NEAREST=NEK10;INTRON=2/13
rs490706	3:27330615	A	ENSG00000163491	ENST00000341435	Transcript	intron_variant	-	-	-	-	-	-	IMPACT=MODIFIER;STRAND=-1;SYMBOL=NEK10;SYMBOL_SOURCE=HGNC;HGNC_ID=18592;NEAREST=NEK10;INTRON=20/24
rs490706	3:27330615	A	ENSG00000163491	ENST00000357467	Transcript	intron_variant	-	-	-	-	-	-	IMPACT=MODIFIER;STRAND=-1;SYMBOL=NEK10;SYMBOL_SOURCE=HGNC;HGNC_ID=18592;NEAREST=NEK10;INTRON=1/12
rs490706	3:27330615	A	ENSG00000163491	ENST00000424275	Transcript	intron_variant	-	-	-	-	-	-	IMPACT=MODIFIER;STRAND=-1;FLAGS=cds_start_NF;SYMBOL=NEK10;SYMBOL_SOURCE=HGNC;HGNC_ID=18592;NEAREST=NEK10;INTRON=2/6
rs490706	3:27330615	A	ENSG00000163491	ENST00000429845	Transcript	intron_variant	-	-	-	-	-	-	IMPACT=MODIFIER;STRAND=-1;SYMBOL=NEK10;SYMBOL_SOURCE=HGNC;HGNC_ID=18592;NEAREST=NEK10;INTRON=20/38
rs490706	3:27330615	A	ENSG00000163491	ENST00000435584	Transcript	intron_variant	-	-	-	-	-	-	IMPACT=MODIFIER;STRAND=-1;FLAGS=cds_start_NF;SYMBOL=NEK10;SYMBOL_SOURCE=HGNC;HGNC_ID=18592;NEAREST=NEK10;INTRON=1/5
rs490706	3:27330615	A	ENSG00000163491	ENST00000474938	Transcript	upstream_gene_variant	-	-	-	-	-	-	IMPACT=MODIFIER;DISTANCE=4223;STRAND=-1;SYMBOL=NEK10;SYMBOL_SOURCE=HGNC;HGNC_ID=18592;NEAREST=NEK10
rs490706	3:27330615	A	ENSG00000163491	ENST00000574215	Transcript	intron_variant,non_coding_transcript_variant	-	-	-	-	-	-	IMPACT=MODIFIER;STRAND=-1;SYMBOL=NEK10;SYMBOL_SOURCE=HGNC;HGNC_ID=18592;NEAREST=NEK10;INTRON=2/13
rs633157	3:27335350	T	ENSG00000163491	ENST00000341435	Transcript	intron_variant	-	-	-	-	-	-	IMPACT=MODIFIER;STRAND=-1;SYMBOL=NEK10;SYMBOL_SOURCE=HGNC;HGNC_ID=18592;NEAREST=NEK10;INTRON=16/24
rs633157	3:27335350	T	ENSG00000163491	ENST00000357467	Transcript	upstream_gene_variant	-	-	-	-	-	-	IMPACT=MODIFIER;DISTANCE=2461;STRAND=-1;SYMBOL=NEK10;SYMBOL_SOURCE=HGNC;HGNC_ID=18592;NEAREST=NEK10
rs633157	3:27335350	T	ENSG00000163491	ENST00000424275	Transcript	upstream_gene_variant	-	-	-	-	-	-	IMPACT=MODIFIER;DISTANCE=2302;STRAND=-1;FLAGS=cds_start_NF;SYMBOL=NEK10;SYMBOL_SOURCE=HGNC;HGNC_ID=18592;NEAREST=NEK10
rs633157	3:27335350	T	ENSG00000163491	ENST00000429845	Transcript	intron_variant	-	-	-	-	-	-	IMPACT=MODIFIER;STRAND=-1;SYMBOL=NEK10;SYMBOL_SOURCE=HGNC;HGNC_ID=18592;NEAREST=NEK10;INTRON=16/38
rs633157	3:27335350	T	ENSG00000163491	ENST00000435584	Transcript	upstream_gene_variant	-	-	-	-	-	-	IMPACT=MODIFIER;DISTANCE=3131;STRAND=-1;FLAGS=cds_start_NF;SYMBOL=NEK10;SYMBOL_SOURCE=HGNC;HGNC_ID=18592;NEAREST=NEK10
rs633157	3:27335350	T	ENSG00000163491	ENST00000574215	Transcript	upstream_gene_variant	-	-	-	-	-	-	IMPACT=MODIFIER;DISTANCE=2366;STRAND=-1;SYMBOL=NEK10;SYMBOL_SOURCE=HGNC;HGNC_ID=18592;NEAREST=NEK10
rs472146	3:27337379	C	ENSG00000163491	ENST00000341435	Transcript	intron_variant	-	-	-	-	-	-	IMPACT=MODIFIER;STRAND=-1;SYMBOL=NEK10;SYMBOL_SOURCE=HGNC;HGNC_ID=18592;NEAREST=NEK10;INTRON=15/24
rs472146	3:27337379	C	ENSG00000163491	ENST00000357467	Transcript	upstream_gene_variant	-	-	-	-	-	-	IMPACT=MODIFIER;DISTANCE=4490;STRAND=-1;SYMBOL=NEK10;SYMBOL_SOURCE=HGNC;HGNC_ID=18592;NEAREST=NEK10
rs472146	3:27337379	C	ENSG00000163491	ENST00000424275	Transcript	upstream_gene_variant	-	-	-	-	-	-	IMPACT=MODIFIER;DISTANCE=4331;STRAND=-1;FLAGS=cds_start_NF;SYMBOL=NEK10;SYMBOL_SOURCE=HGNC;HGNC_ID=18592;NEAREST=NEK10
rs472146	3:27337379	C	ENSG00000163491	ENST00000429845	Transcript	intron_variant	-	-	-	-	-	-	IMPACT=MODIFIER;STRAND=-1;SYMBOL=NEK10;SYMBOL_SOURCE=HGNC;HGNC_ID=18592;NEAREST=NEK10;INTRON=15/38
rs472146	3:27337379	C	ENSG00000163491	ENST00000574215	Transcript	upstream_gene_variant	-	-	-	-	-	-	IMPACT=MODIFIER;DISTANCE=4395;STRAND=-1;SYMBOL=NEK10;SYMBOL_SOURCE=HGNC;HGNC_ID=18592;NEAREST=NEK10
rs628802	3:27341789	G	ENSG00000163491	ENST00000341435	Transcript	intron_variant	-	-	-	-	-	-	IMPACT=MODIFIER;STRAND=-1;SYMBOL=NEK10;SYMBOL_SOURCE=HGNC;HGNC_ID=18592;NEAREST=NEK10;INTRON=14/24
rs628802	3:27341789	G	ENSG00000163491	ENST00000429845	Transcript	intron_variant	-	-	-	-	-	-	IMPACT=MODIFIER;STRAND=-1;SYMBOL=NEK10;SYMBOL_SOURCE=HGNC;HGNC_ID=18592;NEAREST=NEK10;INTRON=14/38
rs628866	3:27341833	T	ENSG00000163491	ENST00000341435	Transcript	intron_variant	-	-	-	-	-	-	IMPACT=MODIFIER;STRAND=-1;SYMBOL=NEK10;SYMBOL_SOURCE=HGNC;HGNC_ID=18592;NEAREST=NEK10;INTRON=14/24
rs628866	3:27341833	T	ENSG00000163491	ENST00000429845	Transcript	intron_variant	-	-	-	-	-	-	IMPACT=MODIFIER;STRAND=-1;SYMBOL=NEK10;SYMBOL_SOURCE=HGNC;HGNC_ID=18592;NEAREST=NEK10;INTRON=14/38
rs653465	3:27343644	T	ENSG00000163491	ENST00000341435	Transcript	intron_variant	-	-	-	-	-	-	IMPACT=MODIFIER;STRAND=-1;SYMBOL=NEK10;SYMBOL_SOURCE=HGNC;HGNC_ID=18592;NEAREST=NEK10;INTRON=13/24
rs653465	3:27343644	T	ENSG00000163491	ENST00000429845	Transcript	intron_variant	-	-	-	-	-	-	IMPACT=MODIFIER;STRAND=-1;SYMBOL=NEK10;SYMBOL_SOURCE=HGNC;HGNC_ID=18592;NEAREST=NEK10;INTRON=13/38
rs571978	3:27344193	G	ENSG00000163491	ENST00000341435	Transcript	intron_variant	-	-	-	-	-	-	IMPACT=MODIFIER;STRAND=-1;SYMBOL=NEK10;SYMBOL_SOURCE=HGNC;HGNC_ID=18592;NEAREST=NEK10;INTRON=13/24
rs571978	3:27344193	G	ENSG00000163491	ENST00000429845	Transcript	intron_variant	-	-	-	-	-	-	IMPACT=MODIFIER;STRAND=-1;SYMBOL=NEK10;SYMBOL_SOURCE=HGNC;HGNC_ID=18592;NEAREST=NEK10;INTRON=13/38
rs580057	3:27345103	A	ENSG00000163491	ENST00000341435	Transcript	intron_variant	-	-	-	-	-	-	IMPACT=MODIFIER;STRAND=-1;SYMBOL=NEK10;SYMBOL_SOURCE=HGNC;HGNC_ID=18592;NEAREST=NEK10;INTRON=13/24
rs580057	3:27345103	A	ENSG00000163491	ENST00000429845	Transcript	intron_variant	-	-	-	-	-	-	IMPACT=MODIFIER;STRAND=-1;SYMBOL=NEK10;SYMBOL_SOURCE=HGNC;HGNC_ID=18592;NEAREST=NEK10;INTRON=13/38
rs542946	3:27349849	G	ENSG00000163491	ENST00000341435	Transcript	intron_variant	-	-	-	-	-	-	IMPACT=MODIFIER;STRAND=-1;SYMBOL=NEK10;SYMBOL_SOURCE=HGNC;HGNC_ID=18592;NEAREST=NEK10;INTRON=11/24
rs542946	3:27349849	G	ENSG00000163491	ENST00000429845	Transcript	intron_variant	-	-	-	-	-	-	IMPACT=MODIFIER;STRAND=-1;SYMBOL=NEK10;SYMBOL_SOURCE=HGNC;HGNC_ID=18592;NEAREST=NEK10;INTRON=11/38
rs542946	3:27349849	G	ENSG00000163491	ENST00000491627	Transcript	downstream_gene_variant	-	-	-	-	-	-	IMPACT=MODIFIER;DISTANCE=799;STRAND=-1;SYMBOL=NEK10;SYMBOL_SOURCE=HGNC;HGNC_ID=18592;NEAREST=NEK10
rs646157	3:27352143	A	ENSG00000163491	ENST00000341435	Transcript	intron_variant	-	-	-	-	-	-	IMPACT=MODIFIER;STRAND=-1;SYMBOL=NEK10;SYMBOL_SOURCE=HGNC;HGNC_ID=18592;NEAREST=NEK10;INTRON=10/24
rs646157	3:27352143	A	ENSG00000163491	ENST00000429845	Transcript	intron_variant	-	-	-	-	-	-	IMPACT=MODIFIER;STRAND=-1;SYMBOL=NEK10;SYMBOL_SOURCE=HGNC;HGNC_ID=18592;NEAREST=NEK10;INTRON=10/38
rs646157	3:27352143	A	ENSG00000163491	ENST00000491627	Transcript	non_coding_transcript_exon_variant	2218	-	-	-	-	-	IMPACT=MODIFIER;STRAND=-1;SYMBOL=NEK10;SYMBOL_SOURCE=HGNC;HGNC_ID=18592;NEAREST=NEK10;EXON=8/8
rs552647	3:27353716	A	ENSG00000163491	ENST00000341435	Transcript	intron_variant	-	-	-	-	-	-	IMPACT=MODIFIER;STRAND=-1;SYMBOL=NEK10;SYMBOL_SOURCE=HGNC;HGNC_ID=18592;NEAREST=NEK10;INTRON=8/24
rs552647	3:27353716	A	ENSG00000163491	ENST00000429845	Transcript	intron_variant	-	-	-	-	-	-	IMPACT=MODIFIER;STRAND=-1;SYMBOL=NEK10;SYMBOL_SOURCE=HGNC;HGNC_ID=18592;NEAREST=NEK10;INTRON=8/38
rs552647	3:27353716	A	ENSG00000163491	ENST00000491627	Transcript	intron_variant,non_coding_transcript_variant	-	-	-	-	-	-	IMPACT=MODIFIER;STRAND=-1;SYMBOL=NEK10;SYMBOL_SOURCE=HGNC;HGNC_ID=18592;NEAREST=NEK10;INTRON=7/7
rs552647	3:27353716	A	-	ENSR00000395233	RegulatoryFeature	regulatory_region_variant	-	-	-	-	-	-	IMPACT=MODIFIER;NEAREST=NEK10;BIOTYPE=CTCF_binding_site
rs552647	3:27353716	A	-	ENSR00000395234	RegulatoryFeature	regulatory_region_variant	-	-	-	-	-	-	IMPACT=MODIFIER;NEAREST=NEK10;BIOTYPE=enhancer
rs599298	3:27355115	C	ENSG00000163491	ENST00000341435	Transcript	intron_variant	-	-	-	-	-	-	IMPACT=MODIFIER;STRAND=-1;SYMBOL=NEK10;SYMBOL_SOURCE=HGNC;HGNC_ID=18592;NEAREST=NEK10;INTRON=8/24
rs599298	3:27355115	C	ENSG00000163491	ENST00000429845	Transcript	intron_variant	-	-	-	-	-	-	IMPACT=MODIFIER;STRAND=-1;SYMBOL=NEK10;SYMBOL_SOURCE=HGNC;HGNC_ID=18592;NEAREST=NEK10;INTRON=8/38
rs599298	3:27355115	C	ENSG00000163491	ENST00000491627	Transcript	intron_variant,non_coding_transcript_variant	-	-	-	-	-	-	IMPACT=MODIFIER;STRAND=-1;SYMBOL=NEK10;SYMBOL_SOURCE=HGNC;HGNC_ID=18592;NEAREST=NEK10;INTRON=7/7
rs616820	3:27356779	G	ENSG00000163491	ENST00000341435	Transcript	intron_variant	-	-	-	-	-	-	IMPACT=MODIFIER;STRAND=-1;SYMBOL=NEK10;SYMBOL_SOURCE=HGNC;HGNC_ID=18592;NEAREST=NEK10;INTRON=7/24
rs616820	3:27356779	G	ENSG00000163491	ENST00000429845	Transcript	intron_variant	-	-	-	-	-	-	IMPACT=MODIFIER;STRAND=-1;SYMBOL=NEK10;SYMBOL_SOURCE=HGNC;HGNC_ID=18592;NEAREST=NEK10;INTRON=7/38
rs616820	3:27356779	G	ENSG00000163491	ENST00000491627	Transcript	intron_variant,non_coding_transcript_variant	-	-	-	-	-	-	IMPACT=MODIFIER;STRAND=-1;SYMBOL=NEK10;SYMBOL_SOURCE=HGNC;HGNC_ID=18592;NEAREST=NEK10;INTRON=6/7
rs547518	3:27358405	T	ENSG00000163491	ENST00000341435	Transcript	intron_variant	-	-	-	-	-	-	IMPACT=MODIFIER;STRAND=-1;SYMBOL=NEK10;SYMBOL_SOURCE=HGNC;HGNC_ID=18592;NEAREST=NEK10;INTRON=7/24
rs547518	3:27358405	T	ENSG00000163491	ENST00000429845	Transcript	intron_variant	-	-	-	-	-	-	IMPACT=MODIFIER;STRAND=-1;SYMBOL=NEK10;SYMBOL_SOURCE=HGNC;HGNC_ID=18592;NEAREST=NEK10;INTRON=7/38
rs547518	3:27358405	T	ENSG00000163491	ENST00000491627	Transcript	intron_variant,non_coding_transcript_variant	-	-	-	-	-	-	IMPACT=MODIFIER;STRAND=-1;SYMBOL=NEK10;SYMBOL_SOURCE=HGNC;HGNC_ID=18592;NEAREST=NEK10;INTRON=6/7
rs583298	3:27361880	C	ENSG00000163491	ENST00000341435	Transcript	intron_variant	-	-	-	-	-	-	IMPACT=MODIFIER;STRAND=-1;SYMBOL=NEK10;SYMBOL_SOURCE=HGNC;HGNC_ID=18592;NEAREST=NEK10;INTRON=7/24
rs583298	3:27361880	C	ENSG00000163491	ENST00000429845	Transcript	intron_variant	-	-	-	-	-	-	IMPACT=MODIFIER;STRAND=-1;SYMBOL=NEK10;SYMBOL_SOURCE=HGNC;HGNC_ID=18592;NEAREST=NEK10;INTRON=7/38
rs583298	3:27361880	C	ENSG00000163491	ENST00000435750	Transcript	downstream_gene_variant	-	-	-	-	-	-	IMPACT=MODIFIER;DISTANCE=1837;STRAND=-1;FLAGS=cds_end_NF;SYMBOL=NEK10;SYMBOL_SOURCE=HGNC;HGNC_ID=18592;NEAREST=NEK10
rs583298	3:27361880	C	ENSG00000163491	ENST00000491627	Transcript	intron_variant,non_coding_transcript_variant	-	-	-	-	-	-	IMPACT=MODIFIER;STRAND=-1;SYMBOL=NEK10;SYMBOL_SOURCE=HGNC;HGNC_ID=18592;NEAREST=NEK10;INTRON=6/7
rs491976	3:27367221	C	ENSG00000163491	ENST00000341435	Transcript	intron_variant	-	-	-	-	-	-	IMPACT=MODIFIER;STRAND=-1;SYMBOL=NEK10;SYMBOL_SOURCE=HGNC;HGNC_ID=18592;NEAREST=NEK10;INTRON=6/24
rs491976	3:27367221	C	ENSG00000163491	ENST00000429845	Transcript	intron_variant	-	-	-	-	-	-	IMPACT=MODIFIER;STRAND=-1;SYMBOL=NEK10;SYMBOL_SOURCE=HGNC;HGNC_ID=18592;NEAREST=NEK10;INTRON=6/38
rs491976	3:27367221	C	ENSG00000163491	ENST00000435750	Transcript	intron_variant	-	-	-	-	-	-	IMPACT=MODIFIER;STRAND=-1;FLAGS=cds_end_NF;SYMBOL=NEK10;SYMBOL_SOURCE=HGNC;HGNC_ID=18592;NEAREST=NEK10;INTRON=5/5
rs491976	3:27367221	C	ENSG00000163491	ENST00000491627	Transcript	intron_variant,non_coding_transcript_variant	-	-	-	-	-	-	IMPACT=MODIFIER;STRAND=-1;SYMBOL=NEK10;SYMBOL_SOURCE=HGNC;HGNC_ID=18592;NEAREST=NEK10;INTRON=5/7
rs491976	3:27367221	C	-	ENSR00000395235	RegulatoryFeature	regulatory_region_variant	-	-	-	-	-	-	IMPACT=MODIFIER;NEAREST=NEK10;BIOTYPE=enhancer
rs1352941	3:27368425	T	ENSG00000163491	ENST00000341435	Transcript	intron_variant	-	-	-	-	-	-	IMPACT=MODIFIER;STRAND=-1;SYMBOL=NEK10;SYMBOL_SOURCE=HGNC;HGNC_ID=18592;NEAREST=NEK10;INTRON=6/24
rs1352941	3:27368425	T	ENSG00000163491	ENST00000429845	Transcript	intron_variant	-	-	-	-	-	-	IMPACT=MODIFIER;STRAND=-1;SYMBOL=NEK10;SYMBOL_SOURCE=HGNC;HGNC_ID=18592;NEAREST=NEK10;INTRON=6/38
rs1352941	3:27368425	T	ENSG00000163491	ENST00000435750	Transcript	intron_variant	-	-	-	-	-	-	IMPACT=MODIFIER;STRAND=-1;FLAGS=cds_end_NF;SYMBOL=NEK10;SYMBOL_SOURCE=HGNC;HGNC_ID=18592;NEAREST=NEK10;INTRON=5/5
rs1352941	3:27368425	T	ENSG00000163491	ENST00000491627	Transcript	intron_variant,non_coding_transcript_variant	-	-	-	-	-	-	IMPACT=MODIFIER;STRAND=-1;SYMBOL=NEK10;SYMBOL_SOURCE=HGNC;HGNC_ID=18592;NEAREST=NEK10;INTRON=5/7
rs1352941	3:27368425	T	-	ENSR00000149974	RegulatoryFeature	regulatory_region_variant	-	-	-	-	-	-	IMPACT=MODIFIER;NEAREST=NEK10;BIOTYPE=enhancer
rs1352943	3:27368875	G	ENSG00000163491	ENST00000341435	Transcript	intron_variant	-	-	-	-	-	-	IMPACT=MODIFIER;STRAND=-1;SYMBOL=NEK10;SYMBOL_SOURCE=HGNC;HGNC_ID=18592;NEAREST=NEK10;INTRON=6/24
rs1352943	3:27368875	G	ENSG00000163491	ENST00000429845	Transcript	intron_variant	-	-	-	-	-	-	IMPACT=MODIFIER;STRAND=-1;SYMBOL=NEK10;SYMBOL_SOURCE=HGNC;HGNC_ID=18592;NEAREST=NEK10;INTRON=6/38
rs1352943	3:27368875	G	ENSG00000163491	ENST00000435750	Transcript	intron_variant	-	-	-	-	-	-	IMPACT=MODIFIER;STRAND=-1;FLAGS=cds_end_NF;SYMBOL=NEK10;SYMBOL_SOURCE=HGNC;HGNC_ID=18592;NEAREST=NEK10;INTRON=5/5
rs1352943	3:27368875	G	ENSG00000163491	ENST00000491627	Transcript	intron_variant,non_coding_transcript_variant	-	-	-	-	-	-	IMPACT=MODIFIER;STRAND=-1;SYMBOL=NEK10;SYMBOL_SOURCE=HGNC;HGNC_ID=18592;NEAREST=NEK10;INTRON=5/7
rs3920005	3:27368884	C	ENSG00000163491	ENST00000341435	Transcript	intron_variant	-	-	-	-	-	-	IMPACT=MODIFIER;STRAND=-1;SYMBOL=NEK10;SYMBOL_SOURCE=HGNC;HGNC_ID=18592;NEAREST=NEK10;INTRON=6/24
rs3920005	3:27368884	C	ENSG00000163491	ENST00000429845	Transcript	intron_variant	-	-	-	-	-	-	IMPACT=MODIFIER;STRAND=-1;SYMBOL=NEK10;SYMBOL_SOURCE=HGNC;HGNC_ID=18592;NEAREST=NEK10;INTRON=6/38
rs3920005	3:27368884	C	ENSG00000163491	ENST00000435750	Transcript	intron_variant	-	-	-	-	-	-	IMPACT=MODIFIER;STRAND=-1;FLAGS=cds_end_NF;SYMBOL=NEK10;SYMBOL_SOURCE=HGNC;HGNC_ID=18592;NEAREST=NEK10;INTRON=5/5
rs3920005	3:27368884	C	ENSG00000163491	ENST00000491627	Transcript	intron_variant,non_coding_transcript_variant	-	-	-	-	-	-	IMPACT=MODIFIER;STRAND=-1;SYMBOL=NEK10;SYMBOL_SOURCE=HGNC;HGNC_ID=18592;NEAREST=NEK10;INTRON=5/7
rs55782834	3:27372628	T	ENSG00000163491	ENST00000341435	Transcript	intron_variant	-	-	-	-	-	-	IMPACT=MODIFIER;STRAND=-1;SYMBOL=NEK10;SYMBOL_SOURCE=HGNC;HGNC_ID=18592;NEAREST=NEK10;INTRON=6/24
rs55782834	3:27372628	T	ENSG00000163491	ENST00000429845	Transcript	intron_variant	-	-	-	-	-	-	IMPACT=MODIFIER;STRAND=-1;SYMBOL=NEK10;SYMBOL_SOURCE=HGNC;HGNC_ID=18592;NEAREST=NEK10;INTRON=6/38
rs55782834	3:27372628	T	ENSG00000163491	ENST00000435750	Transcript	intron_variant	-	-	-	-	-	-	IMPACT=MODIFIER;STRAND=-1;FLAGS=cds_end_NF;SYMBOL=NEK10;SYMBOL_SOURCE=HGNC;HGNC_ID=18592;NEAREST=NEK10;INTRON=5/5
rs55782834	3:27372628	T	ENSG00000163491	ENST00000491627	Transcript	intron_variant,non_coding_transcript_variant	-	-	-	-	-	-	IMPACT=MODIFIER;STRAND=-1;SYMBOL=NEK10;SYMBOL_SOURCE=HGNC;HGNC_ID=18592;NEAREST=NEK10;INTRON=5/7
rs1352944	3:27374101	A	ENSG00000163491	ENST00000341435	Transcript	intron_variant	-	-	-	-	-	-	IMPACT=MODIFIER;STRAND=-1;SYMBOL=NEK10;SYMBOL_SOURCE=HGNC;HGNC_ID=18592;NEAREST=NEK10;INTRON=6/24
rs1352944	3:27374101	A	ENSG00000163491	ENST00000429845	Transcript	intron_variant	-	-	-	-	-	-	IMPACT=MODIFIER;STRAND=-1;SYMBOL=NEK10;SYMBOL_SOURCE=HGNC;HGNC_ID=18592;NEAREST=NEK10;INTRON=6/38
rs1352944	3:27374101	A	ENSG00000163491	ENST00000435750	Transcript	intron_variant	-	-	-	-	-	-	IMPACT=MODIFIER;STRAND=-1;FLAGS=cds_end_NF;SYMBOL=NEK10;SYMBOL_SOURCE=HGNC;HGNC_ID=18592;NEAREST=NEK10;INTRON=5/5
rs1352944	3:27374101	A	ENSG00000163491	ENST00000491627	Transcript	intron_variant,non_coding_transcript_variant	-	-	-	-	-	-	IMPACT=MODIFIER;STRAND=-1;SYMBOL=NEK10;SYMBOL_SOURCE=HGNC;HGNC_ID=18592;NEAREST=NEK10;INTRON=5/7
rs6774748	3:27405705	G	ENSG00000163491	ENST00000341435	Transcript	intron_variant	-	-	-	-	-	-	IMPACT=MODIFIER;STRAND=-1;SYMBOL=NEK10;SYMBOL_SOURCE=HGNC;HGNC_ID=18592;NEAREST=NEK10;INTRON=2/24
rs6774748	3:27405705	G	ENSG00000221573	ENST00000408646	Transcript	upstream_gene_variant	-	-	-	-	-	-	IMPACT=MODIFIER;DISTANCE=1556;STRAND=-1;SYMBOL=AC099535.1;SYMBOL_SOURCE=Clone_based_ensembl_gene;NEAREST=NEK10
rs6774748	3:27405705	G	ENSG00000163491	ENST00000429845	Transcript	intron_variant	-	-	-	-	-	-	IMPACT=MODIFIER;STRAND=-1;SYMBOL=NEK10;SYMBOL_SOURCE=HGNC;HGNC_ID=18592;NEAREST=NEK10;INTRON=1/38
rs6774748	3:27405705	G	ENSG00000163491	ENST00000435750	Transcript	intron_variant	-	-	-	-	-	-	IMPACT=MODIFIER;STRAND=-1;FLAGS=cds_end_NF;SYMBOL=NEK10;SYMBOL_SOURCE=HGNC;HGNC_ID=18592;NEAREST=NEK10;INTRON=1/5
rs6774748	3:27405705	G	ENSG00000163491	ENST00000491627	Transcript	intron_variant,non_coding_transcript_variant	-	-	-	-	-	-	IMPACT=MODIFIER;STRAND=-1;SYMBOL=NEK10;SYMBOL_SOURCE=HGNC;HGNC_ID=18592;NEAREST=NEK10;INTRON=1/7
rs4973766	3:27413566	T	ENSG00000033867	ENST00000295736	Transcript	downstream_gene_variant	-	-	-	-	-	-	IMPACT=MODIFIER;DISTANCE=648;STRAND=-1;SYMBOL=SLC4A7;SYMBOL_SOURCE=HGNC;HGNC_ID=11033;NEAREST=NEK10
rs4973766	3:27413566	T	ENSG00000163491	ENST00000341435	Transcript	upstream_gene_variant	-	-	-	-	-	-	IMPACT=MODIFIER;DISTANCE=2654;STRAND=-1;SYMBOL=NEK10;SYMBOL_SOURCE=HGNC;HGNC_ID=18592;NEAREST=NEK10
rs4973766	3:27413566	T	ENSG00000033867	ENST00000388777	Transcript	downstream_gene_variant	-	-	-	-	-	-	IMPACT=MODIFIER;DISTANCE=4531;STRAND=-1;SYMBOL=SLC4A7;SYMBOL_SOURCE=HGNC;HGNC_ID=11033;NEAREST=NEK10
rs4973766	3:27413566	T	ENSG00000033867	ENST00000419036	Transcript	downstream_gene_variant	-	-	-	-	-	-	IMPACT=MODIFIER;DISTANCE=648;STRAND=-1;FLAGS=cds_start_NF;SYMBOL=SLC4A7;SYMBOL_SOURCE=HGNC;HGNC_ID=11033;NEAREST=NEK10
rs4973766	3:27413566	T	ENSG00000033867	ENST00000425128	Transcript	downstream_gene_variant	-	-	-	-	-	-	IMPACT=MODIFIER;DISTANCE=4531;STRAND=-1;SYMBOL=SLC4A7;SYMBOL_SOURCE=HGNC;HGNC_ID=11033;NEAREST=NEK10
rs4973766	3:27413566	T	ENSG00000033867	ENST00000428386	Transcript	downstream_gene_variant	-	-	-	-	-	-	IMPACT=MODIFIER;DISTANCE=648;STRAND=-1;SYMBOL=SLC4A7;SYMBOL_SOURCE=HGNC;HGNC_ID=11033;NEAREST=NEK10
rs4973766	3:27413566	T	ENSG00000163491	ENST00000429845	Transcript	upstream_gene_variant	-	-	-	-	-	-	IMPACT=MODIFIER;DISTANCE=2683;STRAND=-1;SYMBOL=NEK10;SYMBOL_SOURCE=HGNC;HGNC_ID=18592;NEAREST=NEK10
rs4973766	3:27413566	T	ENSG00000033867	ENST00000435667	Transcript	downstream_gene_variant	-	-	-	-	-	-	IMPACT=MODIFIER;DISTANCE=4531;STRAND=-1;SYMBOL=SLC4A7;SYMBOL_SOURCE=HGNC;HGNC_ID=11033;NEAREST=NEK10
rs4973766	3:27413566	T	ENSG00000163491	ENST00000435750	Transcript	upstream_gene_variant	-	-	-	-	-	-	IMPACT=MODIFIER;DISTANCE=2615;STRAND=-1;FLAGS=cds_end_NF;SYMBOL=NEK10;SYMBOL_SOURCE=HGNC;HGNC_ID=18592;NEAREST=NEK10
rs4973766	3:27413566	T	ENSG00000033867	ENST00000437179	Transcript	downstream_gene_variant	-	-	-	-	-	-	IMPACT=MODIFIER;DISTANCE=4531;STRAND=-1;SYMBOL=SLC4A7;SYMBOL_SOURCE=HGNC;HGNC_ID=11033;NEAREST=NEK10
rs4973766	3:27413566	T	ENSG00000033867	ENST00000437266	Transcript	downstream_gene_variant	-	-	-	-	-	-	IMPACT=MODIFIER;DISTANCE=4689;STRAND=-1;SYMBOL=SLC4A7;SYMBOL_SOURCE=HGNC;HGNC_ID=11033;NEAREST=NEK10
rs4973766	3:27413566	T	ENSG00000033867	ENST00000438530	Transcript	downstream_gene_variant	-	-	-	-	-	-	IMPACT=MODIFIER;DISTANCE=4531;STRAND=-1;SYMBOL=SLC4A7;SYMBOL_SOURCE=HGNC;HGNC_ID=11033;NEAREST=NEK10
rs4973766	3:27413566	T	ENSG00000033867	ENST00000440156	Transcript	downstream_gene_variant	-	-	-	-	-	-	IMPACT=MODIFIER;DISTANCE=4531;STRAND=-1;SYMBOL=SLC4A7;SYMBOL_SOURCE=HGNC;HGNC_ID=11033;NEAREST=NEK10
rs4973766	3:27413566	T	ENSG00000033867	ENST00000445684	Transcript	downstream_gene_variant	-	-	-	-	-	-	IMPACT=MODIFIER;DISTANCE=4531;STRAND=-1;SYMBOL=SLC4A7;SYMBOL_SOURCE=HGNC;HGNC_ID=11033;NEAREST=NEK10
rs4973766	3:27413566	T	ENSG00000033867	ENST00000446700	Transcript	downstream_gene_variant	-	-	-	-	-	-	IMPACT=MODIFIER;DISTANCE=4531;STRAND=-1;SYMBOL=SLC4A7;SYMBOL_SOURCE=HGNC;HGNC_ID=11033;NEAREST=NEK10
rs4973766	3:27413566	T	ENSG00000033867	ENST00000454389	Transcript	downstream_gene_variant	-	-	-	-	-	-	IMPACT=MODIFIER;DISTANCE=4531;STRAND=-1;SYMBOL=SLC4A7;SYMBOL_SOURCE=HGNC;HGNC_ID=11033;NEAREST=NEK10
rs4973766	3:27413566	T	ENSG00000033867	ENST00000455077	Transcript	downstream_gene_variant	-	-	-	-	-	-	IMPACT=MODIFIER;DISTANCE=4531;STRAND=-1;SYMBOL=SLC4A7;SYMBOL_SOURCE=HGNC;HGNC_ID=11033;NEAREST=NEK10
rs4973766	3:27413566	T	ENSG00000033867	ENST00000457377	Transcript	downstream_gene_variant	-	-	-	-	-	-	IMPACT=MODIFIER;DISTANCE=4531;STRAND=-1;SYMBOL=SLC4A7;SYMBOL_SOURCE=HGNC;HGNC_ID=11033;NEAREST=NEK10
rs4973766	3:27413566	T	ENSG00000033867	ENST00000465487	Transcript	downstream_gene_variant	-	-	-	-	-	-	IMPACT=MODIFIER;DISTANCE=4654;STRAND=-1;SYMBOL=SLC4A7;SYMBOL_SOURCE=HGNC;HGNC_ID=11033;NEAREST=NEK10
rs4973766	3:27413566	T	ENSG00000163491	ENST00000491627	Transcript	upstream_gene_variant	-	-	-	-	-	-	IMPACT=MODIFIER;DISTANCE=2879;STRAND=-1;SYMBOL=NEK10;SYMBOL_SOURCE=HGNC;HGNC_ID=18592;NEAREST=NEK10
rs4973768	3:27416013	T	ENSG00000033867	ENST00000295736	Transcript	3_prime_UTR_variant	5958	-	-	-	-	-	IMPACT=MODIFIER;STRAND=-1;SYMBOL=SLC4A7;SYMBOL_SOURCE=HGNC;HGNC_ID=11033;NEAREST=NEK10;EXON=25/25
rs4973768	3:27416013	T	ENSG00000033867	ENST00000388777	Transcript	downstream_gene_variant	-	-	-	-	-	-	IMPACT=MODIFIER;DISTANCE=2084;STRAND=-1;SYMBOL=SLC4A7;SYMBOL_SOURCE=HGNC;HGNC_ID=11033;NEAREST=NEK10
rs4973768	3:27416013	T	ENSG00000033867	ENST00000419036	Transcript	3_prime_UTR_variant	4648	-	-	-	-	-	IMPACT=MODIFIER;STRAND=-1;FLAGS=cds_start_NF;SYMBOL=SLC4A7;SYMBOL_SOURCE=HGNC;HGNC_ID=11033;NEAREST=NEK10;EXON=18/18
rs4973768	3:27416013	T	ENSG00000033867	ENST00000425128	Transcript	downstream_gene_variant	-	-	-	-	-	-	IMPACT=MODIFIER;DISTANCE=2084;STRAND=-1;SYMBOL=SLC4A7;SYMBOL_SOURCE=HGNC;HGNC_ID=11033;NEAREST=NEK10
rs4973768	3:27416013	T	ENSG00000033867	ENST00000428386	Transcript	3_prime_UTR_variant	5586	-	-	-	-	-	IMPACT=MODIFIER;STRAND=-1;SYMBOL=SLC4A7;SYMBOL_SOURCE=HGNC;HGNC_ID=11033;NEAREST=NEK10;EXON=24/24
rs4973768	3:27416013	T	ENSG00000033867	ENST00000435667	Transcript	downstream_gene_variant	-	-	-	-	-	-	IMPACT=MODIFIER;DISTANCE=2084;STRAND=-1;SYMBOL=SLC4A7;SYMBOL_SOURCE=HGNC;HGNC_ID=11033;NEAREST=NEK10
rs4973768	3:27416013	T	ENSG00000033867	ENST00000437179	Transcript	downstream_gene_variant	-	-	-	-	-	-	IMPACT=MODIFIER;DISTANCE=2084;STRAND=-1;SYMBOL=SLC4A7;SYMBOL_SOURCE=HGNC;HGNC_ID=11033;NEAREST=NEK10
rs4973768	3:27416013	T	ENSG00000033867	ENST00000437266	Transcript	downstream_gene_variant	-	-	-	-	-	-	IMPACT=MODIFIER;DISTANCE=2242;STRAND=-1;SYMBOL=SLC4A7;SYMBOL_SOURCE=HGNC;HGNC_ID=11033;NEAREST=NEK10
rs4973768	3:27416013	T	ENSG00000033867	ENST00000438530	Transcript	downstream_gene_variant	-	-	-	-	-	-	IMPACT=MODIFIER;DISTANCE=2084;STRAND=-1;SYMBOL=SLC4A7;SYMBOL_SOURCE=HGNC;HGNC_ID=11033;NEAREST=NEK10
rs4973768	3:27416013	T	ENSG00000033867	ENST00000440156	Transcript	downstream_gene_variant	-	-	-	-	-	-	IMPACT=MODIFIER;DISTANCE=2084;STRAND=-1;SYMBOL=SLC4A7;SYMBOL_SOURCE=HGNC;HGNC_ID=11033;NEAREST=NEK10
rs4973768	3:27416013	T	ENSG00000033867	ENST00000445684	Transcript	downstream_gene_variant	-	-	-	-	-	-	IMPACT=MODIFIER;DISTANCE=2084;STRAND=-1;SYMBOL=SLC4A7;SYMBOL_SOURCE=HGNC;HGNC_ID=11033;NEAREST=NEK10
rs4973768	3:27416013	T	ENSG00000033867	ENST00000446700	Transcript	downstream_gene_variant	-	-	-	-	-	-	IMPACT=MODIFIER;DISTANCE=2084;STRAND=-1;SYMBOL=SLC4A7;SYMBOL_SOURCE=HGNC;HGNC_ID=11033;NEAREST=NEK10
rs4973768	3:27416013	T	ENSG00000033867	ENST00000454389	Transcript	downstream_gene_variant	-	-	-	-	-	-	IMPACT=MODIFIER;DISTANCE=2084;STRAND=-1;SYMBOL=SLC4A7;SYMBOL_SOURCE=HGNC;HGNC_ID=11033;NEAREST=NEK10
rs4973768	3:27416013	T	ENSG00000033867	ENST00000455077	Transcript	downstream_gene_variant	-	-	-	-	-	-	IMPACT=MODIFIER;DISTANCE=2084;STRAND=-1;SYMBOL=SLC4A7;SYMBOL_SOURCE=HGNC;HGNC_ID=11033;NEAREST=NEK10
rs4973768	3:27416013	T	ENSG00000033867	ENST00000457377	Transcript	downstream_gene_variant	-	-	-	-	-	-	IMPACT=MODIFIER;DISTANCE=2084;STRAND=-1;SYMBOL=SLC4A7;SYMBOL_SOURCE=HGNC;HGNC_ID=11033;NEAREST=NEK10
rs4973768	3:27416013	T	ENSG00000033867	ENST00000465487	Transcript	downstream_gene_variant	-	-	-	-	-	-	IMPACT=MODIFIER;DISTANCE=2207;STRAND=-1;SYMBOL=SLC4A7;SYMBOL_SOURCE=HGNC;HGNC_ID=11033;NEAREST=NEK10
rs1051545	3:27416999	C	ENSG00000033867	ENST00000295736	Transcript	3_prime_UTR_variant	4972	-	-	-	-	-	IMPACT=MODIFIER;STRAND=-1;SYMBOL=SLC4A7;SYMBOL_SOURCE=HGNC;HGNC_ID=11033;NEAREST=NEK10;EXON=25/25
rs1051545	3:27416999	C	ENSG00000033867	ENST00000388777	Transcript	downstream_gene_variant	-	-	-	-	-	-	IMPACT=MODIFIER;DISTANCE=1098;STRAND=-1;SYMBOL=SLC4A7;SYMBOL_SOURCE=HGNC;HGNC_ID=11033;NEAREST=NEK10
rs1051545	3:27416999	C	ENSG00000033867	ENST00000419036	Transcript	3_prime_UTR_variant	3662	-	-	-	-	-	IMPACT=MODIFIER;STRAND=-1;FLAGS=cds_start_NF;SYMBOL=SLC4A7;SYMBOL_SOURCE=HGNC;HGNC_ID=11033;NEAREST=NEK10;EXON=18/18
rs1051545	3:27416999	C	ENSG00000033867	ENST00000425128	Transcript	downstream_gene_variant	-	-	-	-	-	-	IMPACT=MODIFIER;DISTANCE=1098;STRAND=-1;SYMBOL=SLC4A7;SYMBOL_SOURCE=HGNC;HGNC_ID=11033;NEAREST=NEK10
rs1051545	3:27416999	C	ENSG00000033867	ENST00000428386	Transcript	3_prime_UTR_variant	4600	-	-	-	-	-	IMPACT=MODIFIER;STRAND=-1;SYMBOL=SLC4A7;SYMBOL_SOURCE=HGNC;HGNC_ID=11033;NEAREST=NEK10;EXON=24/24
rs1051545	3:27416999	C	ENSG00000033867	ENST00000435667	Transcript	downstream_gene_variant	-	-	-	-	-	-	IMPACT=MODIFIER;DISTANCE=1098;STRAND=-1;SYMBOL=SLC4A7;SYMBOL_SOURCE=HGNC;HGNC_ID=11033;NEAREST=NEK10
rs1051545	3:27416999	C	ENSG00000033867	ENST00000437179	Transcript	downstream_gene_variant	-	-	-	-	-	-	IMPACT=MODIFIER;DISTANCE=1098;STRAND=-1;SYMBOL=SLC4A7;SYMBOL_SOURCE=HGNC;HGNC_ID=11033;NEAREST=NEK10
rs1051545	3:27416999	C	ENSG00000033867	ENST00000437266	Transcript	downstream_gene_variant	-	-	-	-	-	-	IMPACT=MODIFIER;DISTANCE=1256;STRAND=-1;SYMBOL=SLC4A7;SYMBOL_SOURCE=HGNC;HGNC_ID=11033;NEAREST=NEK10
rs1051545	3:27416999	C	ENSG00000033867	ENST00000438530	Transcript	downstream_gene_variant	-	-	-	-	-	-	IMPACT=MODIFIER;DISTANCE=1098;STRAND=-1;SYMBOL=SLC4A7;SYMBOL_SOURCE=HGNC;HGNC_ID=11033;NEAREST=NEK10
rs1051545	3:27416999	C	ENSG00000033867	ENST00000440156	Transcript	downstream_gene_variant	-	-	-	-	-	-	IMPACT=MODIFIER;DISTANCE=1098;STRAND=-1;SYMBOL=SLC4A7;SYMBOL_SOURCE=HGNC;HGNC_ID=11033;NEAREST=NEK10
rs1051545	3:27416999	C	ENSG00000033867	ENST00000445684	Transcript	downstream_gene_variant	-	-	-	-	-	-	IMPACT=MODIFIER;DISTANCE=1098;STRAND=-1;SYMBOL=SLC4A7;SYMBOL_SOURCE=HGNC;HGNC_ID=11033;NEAREST=NEK10
rs1051545	3:27416999	C	ENSG00000033867	ENST00000446700	Transcript	downstream_gene_variant	-	-	-	-	-	-	IMPACT=MODIFIER;DISTANCE=1098;STRAND=-1;SYMBOL=SLC4A7;SYMBOL_SOURCE=HGNC;HGNC_ID=11033;NEAREST=NEK10
rs1051545	3:27416999	C	ENSG00000033867	ENST00000454389	Transcript	downstream_gene_variant	-	-	-	-	-	-	IMPACT=MODIFIER;DISTANCE=1098;STRAND=-1;SYMBOL=SLC4A7;SYMBOL_SOURCE=HGNC;HGNC_ID=11033;NEAREST=NEK10
rs1051545	3:27416999	C	ENSG00000033867	ENST00000455077	Transcript	downstream_gene_variant	-	-	-	-	-	-	IMPACT=MODIFIER;DISTANCE=1098;STRAND=-1;SYMBOL=SLC4A7;SYMBOL_SOURCE=HGNC;HGNC_ID=11033;NEAREST=NEK10
rs1051545	3:27416999	C	ENSG00000033867	ENST00000457377	Transcript	downstream_gene_variant	-	-	-	-	-	-	IMPACT=MODIFIER;DISTANCE=1098;STRAND=-1;SYMBOL=SLC4A7;SYMBOL_SOURCE=HGNC;HGNC_ID=11033;NEAREST=NEK10
rs1051545	3:27416999	C	ENSG00000033867	ENST00000465487	Transcript	downstream_gene_variant	-	-	-	-	-	-	IMPACT=MODIFIER;DISTANCE=1221;STRAND=-1;SYMBOL=SLC4A7;SYMBOL_SOURCE=HGNC;HGNC_ID=11033;NEAREST=NEK10
rs1472254	3:27427225	G	ENSG00000033867	ENST00000295736	Transcript	intron_variant	-	-	-	-	-	-	IMPACT=MODIFIER;STRAND=-1;SYMBOL=SLC4A7;SYMBOL_SOURCE=HGNC;HGNC_ID=11033;NEAREST=NEK10;INTRON=23/24
rs1472254	3:27427225	G	ENSG00000033867	ENST00000388777	Transcript	intron_variant	-	-	-	-	-	-	IMPACT=MODIFIER;STRAND=-1;SYMBOL=SLC4A7;SYMBOL_SOURCE=HGNC;HGNC_ID=11033;NEAREST=NEK10;INTRON=22/24
rs1472254	3:27427225	G	ENSG00000033867	ENST00000419036	Transcript	intron_variant	-	-	-	-	-	-	IMPACT=MODIFIER;STRAND=-1;FLAGS=cds_start_NF;SYMBOL=SLC4A7;SYMBOL_SOURCE=HGNC;HGNC_ID=11033;NEAREST=NEK10;INTRON=15/17
rs1472254	3:27427225	G	ENSG00000033867	ENST00000425128	Transcript	intron_variant	-	-	-	-	-	-	IMPACT=MODIFIER;STRAND=-1;SYMBOL=SLC4A7;SYMBOL_SOURCE=HGNC;HGNC_ID=11033;NEAREST=NEK10;INTRON=22/24
rs1472254	3:27427225	G	ENSG00000033867	ENST00000428179	Transcript	downstream_gene_variant	-	-	-	-	-	-	IMPACT=MODIFIER;DISTANCE=158;STRAND=-1;FLAGS=cds_end_NF;SYMBOL=SLC4A7;SYMBOL_SOURCE=HGNC;HGNC_ID=11033;NEAREST=NEK10
rs1472254	3:27427225	G	ENSG00000033867	ENST00000428386	Transcript	intron_variant	-	-	-	-	-	-	IMPACT=MODIFIER;STRAND=-1;SYMBOL=SLC4A7;SYMBOL_SOURCE=HGNC;HGNC_ID=11033;NEAREST=NEK10;INTRON=22/23
rs1472254	3:27427225	G	ENSG00000033867	ENST00000435667	Transcript	intron_variant	-	-	-	-	-	-	IMPACT=MODIFIER;STRAND=-1;SYMBOL=SLC4A7;SYMBOL_SOURCE=HGNC;HGNC_ID=11033;NEAREST=NEK10;INTRON=22/24
rs1472254	3:27427225	G	ENSG00000033867	ENST00000437179	Transcript	intron_variant	-	-	-	-	-	-	IMPACT=MODIFIER;STRAND=-1;SYMBOL=SLC4A7;SYMBOL_SOURCE=HGNC;HGNC_ID=11033;NEAREST=NEK10;INTRON=22/23
rs1472254	3:27427225	G	ENSG00000033867	ENST00000437266	Transcript	intron_variant,NMD_transcript_variant	-	-	-	-	-	-	IMPACT=MODIFIER;STRAND=-1;SYMBOL=SLC4A7;SYMBOL_SOURCE=HGNC;HGNC_ID=11033;NEAREST=NEK10;INTRON=21/22
rs1472254	3:27427225	G	ENSG00000033867	ENST00000438530	Transcript	intron_variant,NMD_transcript_variant	-	-	-	-	-	-	IMPACT=MODIFIER;STRAND=-1;SYMBOL=SLC4A7;SYMBOL_SOURCE=HGNC;HGNC_ID=11033;NEAREST=NEK10;INTRON=22/23
rs1472254	3:27427225	G	ENSG00000033867	ENST00000440156	Transcript	intron_variant	-	-	-	-	-	-	IMPACT=MODIFIER;STRAND=-1;SYMBOL=SLC4A7;SYMBOL_SOURCE=HGNC;HGNC_ID=11033;NEAREST=NEK10;INTRON=23/25
rs1472254	3:27427225	G	ENSG00000033867	ENST00000445684	Transcript	intron_variant	-	-	-	-	-	-	IMPACT=MODIFIER;STRAND=-1;SYMBOL=SLC4A7;SYMBOL_SOURCE=HGNC;HGNC_ID=11033;NEAREST=NEK10;INTRON=23/24
rs1472254	3:27427225	G	ENSG00000033867	ENST00000446700	Transcript	intron_variant	-	-	-	-	-	-	IMPACT=MODIFIER;STRAND=-1;SYMBOL=SLC4A7;SYMBOL_SOURCE=HGNC;HGNC_ID=11033;NEAREST=NEK10;INTRON=23/24
rs1472254	3:27427225	G	ENSG00000033867	ENST00000454389	Transcript	intron_variant	-	-	-	-	-	-	IMPACT=MODIFIER;STRAND=-1;SYMBOL=SLC4A7;SYMBOL_SOURCE=HGNC;HGNC_ID=11033;NEAREST=NEK10;INTRON=23/25
rs1472254	3:27427225	G	ENSG00000033867	ENST00000455077	Transcript	intron_variant	-	-	-	-	-	-	IMPACT=MODIFIER;STRAND=-1;SYMBOL=SLC4A7;SYMBOL_SOURCE=HGNC;HGNC_ID=11033;NEAREST=NEK10;INTRON=22/24
rs1472254	3:27427225	G	ENSG00000033867	ENST00000457377	Transcript	intron_variant,NMD_transcript_variant	-	-	-	-	-	-	IMPACT=MODIFIER;STRAND=-1;SYMBOL=SLC4A7;SYMBOL_SOURCE=HGNC;HGNC_ID=11033;NEAREST=NEK10;INTRON=21/23
rs1472254	3:27427225	G	ENSG00000033867	ENST00000465487	Transcript	intron_variant,non_coding_transcript_variant	-	-	-	-	-	-	IMPACT=MODIFIER;STRAND=-1;SYMBOL=SLC4A7;SYMBOL_SOURCE=HGNC;HGNC_ID=11033;NEAREST=NEK10;INTRON=3/5
rs1494420	3:27487705	T	ENSG00000033867	ENST00000295736	Transcript	intron_variant	-	-	-	-	-	-	IMPACT=MODIFIER;STRAND=-1;SYMBOL=SLC4A7;SYMBOL_SOURCE=HGNC;HGNC_ID=11033;NEAREST=SLC4A7;INTRON=3/24
rs1494420	3:27487705	T	ENSG00000033867	ENST00000388777	Transcript	intron_variant	-	-	-	-	-	-	IMPACT=MODIFIER;STRAND=-1;SYMBOL=SLC4A7;SYMBOL_SOURCE=HGNC;HGNC_ID=11033;NEAREST=SLC4A7;INTRON=3/24
rs1494420	3:27487705	T	ENSG00000033867	ENST00000425128	Transcript	intron_variant	-	-	-	-	-	-	IMPACT=MODIFIER;STRAND=-1;SYMBOL=SLC4A7;SYMBOL_SOURCE=HGNC;HGNC_ID=11033;NEAREST=SLC4A7;INTRON=3/24
rs1494420	3:27487705	T	ENSG00000033867	ENST00000428005	Transcript	intron_variant,non_coding_transcript_variant	-	-	-	-	-	-	IMPACT=MODIFIER;STRAND=-1;SYMBOL=SLC4A7;SYMBOL_SOURCE=HGNC;HGNC_ID=11033;NEAREST=SLC4A7;INTRON=3/6
rs1494420	3:27487705	T	ENSG00000033867	ENST00000428179	Transcript	intron_variant	-	-	-	-	-	-	IMPACT=MODIFIER;STRAND=-1;FLAGS=cds_end_NF;SYMBOL=SLC4A7;SYMBOL_SOURCE=HGNC;HGNC_ID=11033;NEAREST=SLC4A7;INTRON=3/22
rs1494420	3:27487705	T	ENSG00000033867	ENST00000428386	Transcript	intron_variant	-	-	-	-	-	-	IMPACT=MODIFIER;STRAND=-1;SYMBOL=SLC4A7;SYMBOL_SOURCE=HGNC;HGNC_ID=11033;NEAREST=SLC4A7;INTRON=3/23
rs1494420	3:27487705	T	ENSG00000033867	ENST00000435667	Transcript	intron_variant	-	-	-	-	-	-	IMPACT=MODIFIER;STRAND=-1;SYMBOL=SLC4A7;SYMBOL_SOURCE=HGNC;HGNC_ID=11033;NEAREST=SLC4A7;INTRON=3/24
rs1494420	3:27487705	T	ENSG00000033867	ENST00000437179	Transcript	intron_variant	-	-	-	-	-	-	IMPACT=MODIFIER;STRAND=-1;SYMBOL=SLC4A7;SYMBOL_SOURCE=HGNC;HGNC_ID=11033;NEAREST=SLC4A7;INTRON=3/23
rs1494420	3:27487705	T	ENSG00000033867	ENST00000437266	Transcript	intron_variant,NMD_transcript_variant	-	-	-	-	-	-	IMPACT=MODIFIER;STRAND=-1;SYMBOL=SLC4A7;SYMBOL_SOURCE=HGNC;HGNC_ID=11033;NEAREST=SLC4A7;INTRON=3/22
rs1494420	3:27487705	T	ENSG00000033867	ENST00000438530	Transcript	intron_variant,NMD_transcript_variant	-	-	-	-	-	-	IMPACT=MODIFIER;STRAND=-1;SYMBOL=SLC4A7;SYMBOL_SOURCE=HGNC;HGNC_ID=11033;NEAREST=SLC4A7;INTRON=3/23
rs1494420	3:27487705	T	ENSG00000033867	ENST00000440156	Transcript	intron_variant	-	-	-	-	-	-	IMPACT=MODIFIER;STRAND=-1;SYMBOL=SLC4A7;SYMBOL_SOURCE=HGNC;HGNC_ID=11033;NEAREST=SLC4A7;INTRON=3/25
rs1494420	3:27487705	T	ENSG00000033867	ENST00000445684	Transcript	intron_variant	-	-	-	-	-	-	IMPACT=MODIFIER;STRAND=-1;SYMBOL=SLC4A7;SYMBOL_SOURCE=HGNC;HGNC_ID=11033;NEAREST=SLC4A7;INTRON=3/24
rs1494420	3:27487705	T	ENSG00000033867	ENST00000446700	Transcript	intron_variant	-	-	-	-	-	-	IMPACT=MODIFIER;STRAND=-1;SYMBOL=SLC4A7;SYMBOL_SOURCE=HGNC;HGNC_ID=11033;NEAREST=SLC4A7;INTRON=3/24
rs1494420	3:27487705	T	ENSG00000033867	ENST00000454389	Transcript	intron_variant	-	-	-	-	-	-	IMPACT=MODIFIER;STRAND=-1;SYMBOL=SLC4A7;SYMBOL_SOURCE=HGNC;HGNC_ID=11033;NEAREST=SLC4A7;INTRON=3/25
rs1494420	3:27487705	T	ENSG00000033867	ENST00000455077	Transcript	intron_variant	-	-	-	-	-	-	IMPACT=MODIFIER;STRAND=-1;SYMBOL=SLC4A7;SYMBOL_SOURCE=HGNC;HGNC_ID=11033;NEAREST=SLC4A7;INTRON=3/24
rs1494420	3:27487705	T	ENSG00000033867	ENST00000457377	Transcript	intron_variant,NMD_transcript_variant	-	-	-	-	-	-	IMPACT=MODIFIER;STRAND=-1;SYMBOL=SLC4A7;SYMBOL_SOURCE=HGNC;HGNC_ID=11033;NEAREST=SLC4A7;INTRON=3/23
rs7619833	3:27509714	C	ENSG00000033867	ENST00000388777	Transcript	intron_variant	-	-	-	-	-	-	IMPACT=MODIFIER;STRAND=-1;SYMBOL=SLC4A7;SYMBOL_SOURCE=HGNC;HGNC_ID=11033;NEAREST=SLC4A7;INTRON=1/24
rs7619833	3:27509714	C	ENSG00000033867	ENST00000425128	Transcript	intron_variant	-	-	-	-	-	-	IMPACT=MODIFIER;STRAND=-1;SYMBOL=SLC4A7;SYMBOL_SOURCE=HGNC;HGNC_ID=11033;NEAREST=SLC4A7;INTRON=1/24
rs7619833	3:27509714	C	ENSG00000033867	ENST00000428005	Transcript	intron_variant,non_coding_transcript_variant	-	-	-	-	-	-	IMPACT=MODIFIER;STRAND=-1;SYMBOL=SLC4A7;SYMBOL_SOURCE=HGNC;HGNC_ID=11033;NEAREST=SLC4A7;INTRON=1/6
rs7619833	3:27509714	C	ENSG00000033867	ENST00000435667	Transcript	intron_variant	-	-	-	-	-	-	IMPACT=MODIFIER;STRAND=-1;SYMBOL=SLC4A7;SYMBOL_SOURCE=HGNC;HGNC_ID=11033;NEAREST=SLC4A7;INTRON=1/24
rs7619833	3:27509714	C	ENSG00000033867	ENST00000437179	Transcript	intron_variant	-	-	-	-	-	-	IMPACT=MODIFIER;STRAND=-1;SYMBOL=SLC4A7;SYMBOL_SOURCE=HGNC;HGNC_ID=11033;NEAREST=SLC4A7;INTRON=1/23
rs7619833	3:27509714	C	ENSG00000033867	ENST00000437266	Transcript	intron_variant,NMD_transcript_variant	-	-	-	-	-	-	IMPACT=MODIFIER;STRAND=-1;SYMBOL=SLC4A7;SYMBOL_SOURCE=HGNC;HGNC_ID=11033;NEAREST=SLC4A7;INTRON=1/22
rs7619833	3:27509714	C	ENSG00000033867	ENST00000438530	Transcript	intron_variant,NMD_transcript_variant	-	-	-	-	-	-	IMPACT=MODIFIER;STRAND=-1;SYMBOL=SLC4A7;SYMBOL_SOURCE=HGNC;HGNC_ID=11033;NEAREST=SLC4A7;INTRON=1/23
rs7619833	3:27509714	C	ENSG00000033867	ENST00000440156	Transcript	intron_variant	-	-	-	-	-	-	IMPACT=MODIFIER;STRAND=-1;SYMBOL=SLC4A7;SYMBOL_SOURCE=HGNC;HGNC_ID=11033;NEAREST=SLC4A7;INTRON=1/25
rs7619833	3:27509714	C	ENSG00000033867	ENST00000445684	Transcript	intron_variant	-	-	-	-	-	-	IMPACT=MODIFIER;STRAND=-1;SYMBOL=SLC4A7;SYMBOL_SOURCE=HGNC;HGNC_ID=11033;NEAREST=SLC4A7;INTRON=1/24
rs7619833	3:27509714	C	ENSG00000033867	ENST00000446700	Transcript	intron_variant	-	-	-	-	-	-	IMPACT=MODIFIER;STRAND=-1;SYMBOL=SLC4A7;SYMBOL_SOURCE=HGNC;HGNC_ID=11033;NEAREST=SLC4A7;INTRON=1/24
rs7619833	3:27509714	C	ENSG00000033867	ENST00000454389	Transcript	intron_variant	-	-	-	-	-	-	IMPACT=MODIFIER;STRAND=-1;SYMBOL=SLC4A7;SYMBOL_SOURCE=HGNC;HGNC_ID=11033;NEAREST=SLC4A7;INTRON=1/25
rs7619833	3:27509714	C	ENSG00000033867	ENST00000455077	Transcript	intron_variant	-	-	-	-	-	-	IMPACT=MODIFIER;STRAND=-1;SYMBOL=SLC4A7;SYMBOL_SOURCE=HGNC;HGNC_ID=11033;NEAREST=SLC4A7;INTRON=1/24
rs7619833	3:27509714	C	ENSG00000033867	ENST00000457377	Transcript	intron_variant,NMD_transcript_variant	-	-	-	-	-	-	IMPACT=MODIFIER;STRAND=-1;SYMBOL=SLC4A7;SYMBOL_SOURCE=HGNC;HGNC_ID=11033;NEAREST=SLC4A7;INTRON=1/23
rs4973730	3:27519195	A	ENSG00000033867	ENST00000388777	Transcript	intron_variant	-	-	-	-	-	-	IMPACT=MODIFIER;STRAND=-1;SYMBOL=SLC4A7;SYMBOL_SOURCE=HGNC;HGNC_ID=11033;NEAREST=SLC4A7;INTRON=1/24
rs4973730	3:27519195	A	ENSG00000033867	ENST00000425128	Transcript	intron_variant	-	-	-	-	-	-	IMPACT=MODIFIER;STRAND=-1;SYMBOL=SLC4A7;SYMBOL_SOURCE=HGNC;HGNC_ID=11033;NEAREST=SLC4A7;INTRON=1/24
rs4973730	3:27519195	A	ENSG00000033867	ENST00000428005	Transcript	intron_variant,non_coding_transcript_variant	-	-	-	-	-	-	IMPACT=MODIFIER;STRAND=-1;SYMBOL=SLC4A7;SYMBOL_SOURCE=HGNC;HGNC_ID=11033;NEAREST=SLC4A7;INTRON=1/6
rs4973730	3:27519195	A	ENSG00000033867	ENST00000435667	Transcript	intron_variant	-	-	-	-	-	-	IMPACT=MODIFIER;STRAND=-1;SYMBOL=SLC4A7;SYMBOL_SOURCE=HGNC;HGNC_ID=11033;NEAREST=SLC4A7;INTRON=1/24
rs4973730	3:27519195	A	ENSG00000033867	ENST00000437179	Transcript	intron_variant	-	-	-	-	-	-	IMPACT=MODIFIER;STRAND=-1;SYMBOL=SLC4A7;SYMBOL_SOURCE=HGNC;HGNC_ID=11033;NEAREST=SLC4A7;INTRON=1/23
rs4973730	3:27519195	A	ENSG00000033867	ENST00000437266	Transcript	intron_variant,NMD_transcript_variant	-	-	-	-	-	-	IMPACT=MODIFIER;STRAND=-1;SYMBOL=SLC4A7;SYMBOL_SOURCE=HGNC;HGNC_ID=11033;NEAREST=SLC4A7;INTRON=1/22
rs4973730	3:27519195	A	ENSG00000033867	ENST00000438530	Transcript	intron_variant,NMD_transcript_variant	-	-	-	-	-	-	IMPACT=MODIFIER;STRAND=-1;SYMBOL=SLC4A7;SYMBOL_SOURCE=HGNC;HGNC_ID=11033;NEAREST=SLC4A7;INTRON=1/23
rs4973730	3:27519195	A	ENSG00000033867	ENST00000440156	Transcript	intron_variant	-	-	-	-	-	-	IMPACT=MODIFIER;STRAND=-1;SYMBOL=SLC4A7;SYMBOL_SOURCE=HGNC;HGNC_ID=11033;NEAREST=SLC4A7;INTRON=1/25
rs4973730	3:27519195	A	ENSG00000033867	ENST00000445684	Transcript	intron_variant	-	-	-	-	-	-	IMPACT=MODIFIER;STRAND=-1;SYMBOL=SLC4A7;SYMBOL_SOURCE=HGNC;HGNC_ID=11033;NEAREST=SLC4A7;INTRON=1/24
rs4973730	3:27519195	A	ENSG00000033867	ENST00000446700	Transcript	intron_variant	-	-	-	-	-	-	IMPACT=MODIFIER;STRAND=-1;SYMBOL=SLC4A7;SYMBOL_SOURCE=HGNC;HGNC_ID=11033;NEAREST=SLC4A7;INTRON=1/24
rs4973730	3:27519195	A	ENSG00000033867	ENST00000454389	Transcript	intron_variant	-	-	-	-	-	-	IMPACT=MODIFIER;STRAND=-1;SYMBOL=SLC4A7;SYMBOL_SOURCE=HGNC;HGNC_ID=11033;NEAREST=SLC4A7;INTRON=1/25
rs4973730	3:27519195	A	ENSG00000033867	ENST00000455077	Transcript	intron_variant	-	-	-	-	-	-	IMPACT=MODIFIER;STRAND=-1;SYMBOL=SLC4A7;SYMBOL_SOURCE=HGNC;HGNC_ID=11033;NEAREST=SLC4A7;INTRON=1/24
rs4973730	3:27519195	A	ENSG00000033867	ENST00000457377	Transcript	intron_variant,NMD_transcript_variant	-	-	-	-	-	-	IMPACT=MODIFIER;STRAND=-1;SYMBOL=SLC4A7;SYMBOL_SOURCE=HGNC;HGNC_ID=11033;NEAREST=SLC4A7;INTRON=1/23
rs2857959	4:3740717	G	-	-	-	intergenic_variant	-	-	-	-	-	-	IMPACT=MODIFIER;NEAREST=ADRA2C
rs2857958	4:3741038	G	-	-	-	intergenic_variant	-	-	-	-	-	-	IMPACT=MODIFIER;NEAREST=ADRA2C
rs2857955	4:3741660	C	-	-	-	intergenic_variant	-	-	-	-	-	-	IMPACT=MODIFIER;NEAREST=ADRA2C
rs2748751	4:3742818	T	-	-	-	intergenic_variant	-	-	-	-	-	-	IMPACT=MODIFIER;NEAREST=ADRA2C
rs445275	4:3742998	T	-	-	-	intergenic_variant	-	-	-	-	-	-	IMPACT=MODIFIER;NEAREST=ADRA2C
rs369200	4:3743004	C	-	-	-	intergenic_variant	-	-	-	-	-	-	IMPACT=MODIFIER;NEAREST=ADRA2C
rs374727	4:3743792	G	-	-	-	intergenic_variant	-	-	-	-	-	-	IMPACT=MODIFIER;NEAREST=ADRA2C
rs447354	4:3743797	C	-	-	-	intergenic_variant	-	-	-	-	-	-	IMPACT=MODIFIER;NEAREST=ADRA2C
rs441105	4:3743820	A	-	-	-	intergenic_variant	-	-	-	-	-	-	IMPACT=MODIFIER;NEAREST=ADRA2C
rs419315	4:3744011	T	-	-	-	intergenic_variant	-	-	-	-	-	-	IMPACT=MODIFIER;NEAREST=ADRA2C
rs430608	4:3744069	G	-	-	-	intergenic_variant	-	-	-	-	-	-	IMPACT=MODIFIER;NEAREST=ADRA2C
rs440318	4:3744294	A	-	-	-	intergenic_variant	-	-	-	-	-	-	IMPACT=MODIFIER;NEAREST=ADRA2C
rs423287	4:3745351	G	-	-	-	intergenic_variant	-	-	-	-	-	-	IMPACT=MODIFIER;NEAREST=ADRA2C
rs428771	4:3746133	C	-	-	-	intergenic_variant	-	-	-	-	-	-	IMPACT=MODIFIER;NEAREST=ADRA2C
rs4498196	4:3747842	C	-	-	-	intergenic_variant	-	-	-	-	-	-	IMPACT=MODIFIER;NEAREST=ADRA2C
rs12641452	4:3748134	A	-	ENSR00000165136	RegulatoryFeature	regulatory_region_variant	-	-	-	-	-	-	IMPACT=MODIFIER;NEAREST=ADRA2C;BIOTYPE=open_chromatin_region
rs12641452	4:3748134	A	-	-	-	intergenic_variant	-	-	-	-	-	-	IMPACT=MODIFIER;NEAREST=ADRA2C
rs13340326	4:3752734	T	-	-	-	intergenic_variant	-	-	-	-	-	-	IMPACT=MODIFIER;NEAREST=ADRA2C
rs11943482	4:3752797	G	-	-	-	intergenic_variant	-	-	-	-	-	-	IMPACT=MODIFIER;NEAREST=ADRA2C
rs10013535	4:3753417	T	-	-	-	intergenic_variant	-	-	-	-	-	-	IMPACT=MODIFIER;NEAREST=ADRA2C
rs12645890	4:3754427	G	-	ENSR00000399315	RegulatoryFeature	regulatory_region_variant	-	-	-	-	-	-	IMPACT=MODIFIER;NEAREST=ADRA2C;BIOTYPE=CTCF_binding_site
rs12645890	4:3754427	G	-	-	-	intergenic_variant	-	-	-	-	-	-	IMPACT=MODIFIER;NEAREST=ADRA2C
rs17813250	4:3754715	G	-	ENSR00000399315	RegulatoryFeature	regulatory_region_variant	-	-	-	-	-	-	IMPACT=MODIFIER;NEAREST=ADRA2C;BIOTYPE=CTCF_binding_site
rs17813250	4:3754715	G	-	-	-	intergenic_variant	-	-	-	-	-	-	IMPACT=MODIFIER;NEAREST=ADRA2C
rs9291156	4:3754818	G	-	-	-	intergenic_variant	-	-	-	-	-	-	IMPACT=MODIFIER;NEAREST=ADRA2C
rs10005414	4:3755589	T	ENSG00000250986	ENST00000511928	Transcript	downstream_gene_variant	-	-	-	-	-	-	IMPACT=MODIFIER;DISTANCE=4886;STRAND=-1;SYMBOL=AC141928.1;SYMBOL_SOURCE=Clone_based_vega_gene;NEAREST=ADRA2C
rs10005414	4:3755589	T	-	ENSR00000165138	RegulatoryFeature	regulatory_region_variant	-	-	-	-	-	-	IMPACT=MODIFIER;NEAREST=ADRA2C;BIOTYPE=open_chromatin_region
rs4916601	4:3756297	T	ENSG00000250986	ENST00000511928	Transcript	downstream_gene_variant	-	-	-	-	-	-	IMPACT=MODIFIER;DISTANCE=4178;STRAND=-1;SYMBOL=AC141928.1;SYMBOL_SOURCE=Clone_based_vega_gene;NEAREST=ADRA2C
rs9790534	4:3756512	T	ENSG00000250986	ENST00000511928	Transcript	downstream_gene_variant	-	-	-	-	-	-	IMPACT=MODIFIER;DISTANCE=3963;STRAND=-1;SYMBOL=AC141928.1;SYMBOL_SOURCE=Clone_based_vega_gene;NEAREST=ADRA2C
rs13143189	4:3757380	A	ENSG00000250986	ENST00000511928	Transcript	downstream_gene_variant	-	-	-	-	-	-	IMPACT=MODIFIER;DISTANCE=3095;STRAND=-1;SYMBOL=AC141928.1;SYMBOL_SOURCE=Clone_based_vega_gene;NEAREST=ADRA2C
rs13131264	4:3757751	C	ENSG00000250986	ENST00000511928	Transcript	downstream_gene_variant	-	-	-	-	-	-	IMPACT=MODIFIER;DISTANCE=2724;STRAND=-1;SYMBOL=AC141928.1;SYMBOL_SOURCE=Clone_based_vega_gene;NEAREST=ADRA2C
rs13127170	4:3758382	G	ENSG00000250986	ENST00000511928	Transcript	downstream_gene_variant	-	-	-	-	-	-	IMPACT=MODIFIER;DISTANCE=2093;STRAND=-1;SYMBOL=AC141928.1;SYMBOL_SOURCE=Clone_based_vega_gene;NEAREST=ADRA2C
rs13127170	4:3758382	G	-	ENSR00000165139	RegulatoryFeature	regulatory_region_variant	-	-	-	-	-	-	IMPACT=MODIFIER;NEAREST=ADRA2C;BIOTYPE=TF_binding_site
rs12515615	5:520263	A	ENSG00000066230	ENST00000264938	Transcript	intron_variant	-	-	-	-	-	-	IMPACT=MODIFIER;STRAND=-1;SYMBOL=SLC9A3;SYMBOL_SOURCE=HGNC;HGNC_ID=11073;NEAREST=SLC9A3;INTRON=1/16
rs12515615	5:520263	A	ENSG00000066230	ENST00000514375	Transcript	intron_variant	-	-	-	-	-	-	IMPACT=MODIFIER;STRAND=-1;SYMBOL=SLC9A3;SYMBOL_SOURCE=HGNC;HGNC_ID=11073;NEAREST=SLC9A3;INTRON=1/16
rs12515615	5:520263	A	ENSG00000250385	ENST00000515085	Transcript	upstream_gene_variant	-	-	-	-	-	-	IMPACT=MODIFIER;DISTANCE=4557;STRAND=1;SYMBOL=RP11-310P5.2;SYMBOL_SOURCE=Clone_based_vega_gene;NEAREST=SLC9A3
rs7723049	5:524772	G	ENSG00000066230	ENST00000264938	Transcript	upstream_gene_variant	-	-	-	-	-	-	IMPACT=MODIFIER;DISTANCE=325;STRAND=-1;SYMBOL=SLC9A3;SYMBOL_SOURCE=HGNC;HGNC_ID=11073;NEAREST=SLC9A3
rs7723049	5:524772	G	ENSG00000066230	ENST00000514375	Transcript	upstream_gene_variant	-	-	-	-	-	-	IMPACT=MODIFIER;DISTANCE=327;STRAND=-1;SYMBOL=SLC9A3;SYMBOL_SOURCE=HGNC;HGNC_ID=11073;NEAREST=SLC9A3
rs7723049	5:524772	G	ENSG00000250385	ENST00000515085	Transcript	upstream_gene_variant	-	-	-	-	-	-	IMPACT=MODIFIER;DISTANCE=48;STRAND=1;SYMBOL=RP11-310P5.2;SYMBOL_SOURCE=Clone_based_vega_gene;NEAREST=SLC9A3
rs55726539	5:526807	A	ENSG00000066230	ENST00000264938	Transcript	upstream_gene_variant	-	-	-	-	-	-	IMPACT=MODIFIER;DISTANCE=2360;STRAND=-1;SYMBOL=SLC9A3;SYMBOL_SOURCE=HGNC;HGNC_ID=11073;NEAREST=SLC9A3
rs55726539	5:526807	A	ENSG00000066230	ENST00000514375	Transcript	upstream_gene_variant	-	-	-	-	-	-	IMPACT=MODIFIER;DISTANCE=2362;STRAND=-1;SYMBOL=SLC9A3;SYMBOL_SOURCE=HGNC;HGNC_ID=11073;NEAREST=SLC9A3
rs55726539	5:526807	A	ENSG00000250385	ENST00000515085	Transcript	downstream_gene_variant	-	-	-	-	-	-	IMPACT=MODIFIER;DISTANCE=98;STRAND=1;SYMBOL=RP11-310P5.2;SYMBOL_SOURCE=Clone_based_vega_gene;NEAREST=SLC9A3
rs55726539	5:526807	A	-	ENSR00000402185	RegulatoryFeature	regulatory_region_variant	-	-	-	-	-	-	IMPACT=MODIFIER;NEAREST=SLC9A3;BIOTYPE=CTCF_binding_site
rs6880820	5:528609	C	ENSG00000066230	ENST00000264938	Transcript	upstream_gene_variant	-	-	-	-	-	-	IMPACT=MODIFIER;DISTANCE=4162;STRAND=-1;SYMBOL=SLC9A3;SYMBOL_SOURCE=HGNC;HGNC_ID=11073;NEAREST=SLC9A3
rs6880820	5:528609	C	ENSG00000066230	ENST00000514375	Transcript	upstream_gene_variant	-	-	-	-	-	-	IMPACT=MODIFIER;DISTANCE=4164;STRAND=-1;SYMBOL=SLC9A3;SYMBOL_SOURCE=HGNC;HGNC_ID=11073;NEAREST=SLC9A3
rs6880820	5:528609	C	ENSG00000250385	ENST00000515085	Transcript	downstream_gene_variant	-	-	-	-	-	-	IMPACT=MODIFIER;DISTANCE=1900;STRAND=1;SYMBOL=RP11-310P5.2;SYMBOL_SOURCE=Clone_based_vega_gene;NEAREST=SLC9A3
rs6880820	5:528609	C	-	ENSR00000177437	RegulatoryFeature	regulatory_region_variant	-	-	-	-	-	-	IMPACT=MODIFIER;NEAREST=SLC9A3;BIOTYPE=open_chromatin_region
rs6880820	5:528609	C	-	ENSR00000402186	RegulatoryFeature	regulatory_region_variant	-	-	-	-	-	-	IMPACT=MODIFIER;NEAREST=SLC9A3;BIOTYPE=CTCF_binding_site
rs56230617	5:535662	A	ENSG00000264233	ENST00000582112	Transcript	downstream_gene_variant	-	-	-	-	-	-	IMPACT=MODIFIER;DISTANCE=293;STRAND=-1;SYMBOL=MIR4456;SYMBOL_SOURCE=HGNC;HGNC_ID=41606;NEAREST=SLC9A3
rs56108664	5:537890	T	ENSG00000264233	ENST00000582112	Transcript	upstream_gene_variant	-	-	-	-	-	-	IMPACT=MODIFIER;DISTANCE=1893;STRAND=-1;SYMBOL=MIR4456;SYMBOL_SOURCE=HGNC;HGNC_ID=41606;NEAREST=SLC9A3
rs9800013	5:542023	G	-	ENSR00000177441	RegulatoryFeature	regulatory_region_variant	-	-	-	-	-	-	IMPACT=MODIFIER;NEAREST=SLC9A3;BIOTYPE=open_chromatin_region
rs9800013	5:542023	G	-	-	-	intergenic_variant	-	-	-	-	-	-	IMPACT=MODIFIER;NEAREST=SLC9A3
rs72704791	5:547896	G	-	-	-	intergenic_variant	-	-	-	-	-	-	IMPACT=MODIFIER;NEAREST=SLC9A3
rs61384641	5:548230	A	-	-	-	intergenic_variant	-	-	-	-	-	-	IMPACT=MODIFIER;NEAREST=SLC9A3
rs72704799	5:551457	G	-	-	-	intergenic_variant	-	-	-	-	-	-	IMPACT=MODIFIER;NEAREST=SLC9A3
rs72704802	5:554211	T	-	ENSR00000177444	RegulatoryFeature	regulatory_region_variant	-	-	-	-	-	-	IMPACT=MODIFIER;NEAREST=SLC9A3;BIOTYPE=open_chromatin_region
rs72704802	5:554211	T	-	-	-	intergenic_variant	-	-	-	-	-	-	IMPACT=MODIFIER;NEAREST=SLC9A3
rs28563961	5:554498	G	-	-	-	intergenic_variant	-	-	-	-	-	-	IMPACT=MODIFIER;NEAREST=SLC9A3
rs4527146	5:555236	G	-	-	-	intergenic_variant	-	-	-	-	-	-	IMPACT=MODIFIER;NEAREST=SLC9A3
rs12522303	5:555564	C	-	-	-	intergenic_variant	-	-	-	-	-	-	IMPACT=MODIFIER;NEAREST=SLC9A3
rs12521988	5:556421	T	-	-	-	intergenic_variant	-	-	-	-	-	-	IMPACT=MODIFIER;NEAREST=SLC9A3
rs17497684	5:558307	C	-	-	-	intergenic_variant	-	-	-	-	-	-	IMPACT=MODIFIER;NEAREST=SLC9A3
rs72706606	5:558609	C	-	-	-	intergenic_variant	-	-	-	-	-	-	IMPACT=MODIFIER;NEAREST=SLC9A3
rs12519763	5:559145	T	-	-	-	intergenic_variant	-	-	-	-	-	-	IMPACT=MODIFIER;NEAREST=SLC9A3
rs72706608	5:559203	T	-	-	-	intergenic_variant	-	-	-	-	-	-	IMPACT=MODIFIER;NEAREST=SLC9A3
rs12521051	5:560440	T	-	-	-	intergenic_variant	-	-	-	-	-	-	IMPACT=MODIFIER;NEAREST=SLC9A3
rs17563576	5:560476	G	-	-	-	intergenic_variant	-	-	-	-	-	-	IMPACT=MODIFIER;NEAREST=SLC9A3
rs6555357	5:560923	G	-	-	-	intergenic_variant	-	-	-	-	-	-	IMPACT=MODIFIER;NEAREST=SLC9A3
rs72706610	5:561111	A	-	-	-	intergenic_variant	-	-	-	-	-	-	IMPACT=MODIFIER;NEAREST=SLC9A3
rs72706611	5:561146	A	-	-	-	intergenic_variant	-	-	-	-	-	-	IMPACT=MODIFIER;NEAREST=SLC9A3
rs72706612	5:561198	T	-	-	-	intergenic_variant	-	-	-	-	-	-	IMPACT=MODIFIER;NEAREST=SLC9A3
rs55647623	5:567747	C	-	-	-	intergenic_variant	-	-	-	-	-	-	IMPACT=MODIFIER;NEAREST=SLC9A3
rs56294732	5:568144	C	-	-	-	intergenic_variant	-	-	-	-	-	-	IMPACT=MODIFIER;NEAREST=SLC9A3
rs11948381	5:568413	T	-	-	-	intergenic_variant	-	-	-	-	-	-	IMPACT=MODIFIER;NEAREST=SLC9A3
rs11960158	5:568665	T	-	-	-	intergenic_variant	-	-	-	-	-	-	IMPACT=MODIFIER;NEAREST=CEP72
rs11960159	5:568685	T	-	-	-	intergenic_variant	-	-	-	-	-	-	IMPACT=MODIFIER;NEAREST=CEP72
rs11960196	5:568857	A	-	-	-	intergenic_variant	-	-	-	-	-	-	IMPACT=MODIFIER;NEAREST=CEP72
rs4957057	5:569230	G	-	-	-	intergenic_variant	-	-	-	-	-	-	IMPACT=MODIFIER;NEAREST=CEP72
rs4957056	5:570105	C	-	-	-	intergenic_variant	-	-	-	-	-	-	IMPACT=MODIFIER;NEAREST=CEP72
rs72703026	5:572383	A	-	-	-	intergenic_variant	-	-	-	-	-	-	IMPACT=MODIFIER;NEAREST=CEP72
rs3915384	5:573395	A	-	-	-	intergenic_variant	-	-	-	-	-	-	IMPACT=MODIFIER;NEAREST=CEP72
rs4081846	5:574019	A	-	-	-	intergenic_variant	-	-	-	-	-	-	IMPACT=MODIFIER;NEAREST=CEP72
rs4081847	5:574072	A	-	-	-	intergenic_variant	-	-	-	-	-	-	IMPACT=MODIFIER;NEAREST=CEP72
rs4957053	5:575927	C	-	-	-	intergenic_variant	-	-	-	-	-	-	IMPACT=MODIFIER;NEAREST=CEP72
rs111352378	5:577079	A	-	-	-	intergenic_variant	-	-	-	-	-	-	IMPACT=MODIFIER;NEAREST=CEP72
rs72703034	5:577101	T	-	-	-	intergenic_variant	-	-	-	-	-	-	IMPACT=MODIFIER;NEAREST=CEP72
rs7443550	5:578404	T	-	-	-	intergenic_variant	-	-	-	-	-	-	IMPACT=MODIFIER;NEAREST=CEP72
rs4245972	5:578572	G	-	-	-	intergenic_variant	-	-	-	-	-	-	IMPACT=MODIFIER;NEAREST=CEP72
rs4957050	5:579066	C	-	-	-	intergenic_variant	-	-	-	-	-	-	IMPACT=MODIFIER;NEAREST=CEP72
rs4957049	5:579080	A	-	-	-	intergenic_variant	-	-	-	-	-	-	IMPACT=MODIFIER;NEAREST=CEP72
rs72703042	5:579269	T	-	-	-	intergenic_variant	-	-	-	-	-	-	IMPACT=MODIFIER;NEAREST=CEP72
rs72703044	5:579737	A	-	-	-	intergenic_variant	-	-	-	-	-	-	IMPACT=MODIFIER;NEAREST=CEP72
rs72703046	5:580129	C	-	-	-	intergenic_variant	-	-	-	-	-	-	IMPACT=MODIFIER;NEAREST=CEP72
rs58015612	5:580665	T	-	-	-	intergenic_variant	-	-	-	-	-	-	IMPACT=MODIFIER;NEAREST=CEP72
rs56216231	5:581193	A	-	-	-	intergenic_variant	-	-	-	-	-	-	IMPACT=MODIFIER;NEAREST=CEP72
rs12519469	5:581772	G	-	-	-	intergenic_variant	-	-	-	-	-	-	IMPACT=MODIFIER;NEAREST=CEP72
rs11955068	5:582324	T	-	-	-	intergenic_variant	-	-	-	-	-	-	IMPACT=MODIFIER;NEAREST=CEP72
rs56368535	5:582362	A	-	-	-	intergenic_variant	-	-	-	-	-	-	IMPACT=MODIFIER;NEAREST=CEP72
rs56278696	5:582669	G	-	-	-	intergenic_variant	-	-	-	-	-	-	IMPACT=MODIFIER;NEAREST=CEP72
rs72703050	5:582917	C	-	-	-	intergenic_variant	-	-	-	-	-	-	IMPACT=MODIFIER;NEAREST=CEP72
rs72703051	5:582997	A	-	-	-	intergenic_variant	-	-	-	-	-	-	IMPACT=MODIFIER;NEAREST=CEP72
rs56350081	5:583198	A	-	-	-	intergenic_variant	-	-	-	-	-	-	IMPACT=MODIFIER;NEAREST=CEP72
rs56410216	5:583216	A	-	-	-	intergenic_variant	-	-	-	-	-	-	IMPACT=MODIFIER;NEAREST=CEP72
rs4957048	5:583442	A	-	-	-	intergenic_variant	-	-	-	-	-	-	IMPACT=MODIFIER;NEAREST=CEP72
rs12522140	5:587261	A	-	ENSR00000313676	RegulatoryFeature	regulatory_region_variant	-	-	-	-	-	-	IMPACT=MODIFIER;NEAREST=CEP72;BIOTYPE=CTCF_binding_site
rs12522140	5:587261	A	-	-	-	intergenic_variant	-	-	-	-	-	-	IMPACT=MODIFIER;NEAREST=CEP72
rs12518859	5:587432	T	-	-	-	intergenic_variant	-	-	-	-	-	-	IMPACT=MODIFIER;NEAREST=CEP72
rs72703064	5:587825	C	-	-	-	intergenic_variant	-	-	-	-	-	-	IMPACT=MODIFIER;NEAREST=CEP72
rs72703065	5:588123	A	-	-	-	intergenic_variant	-	-	-	-	-	-	IMPACT=MODIFIER;NEAREST=CEP72
rs1399381	5:589853	T	-	-	-	intergenic_variant	-	-	-	-	-	-	IMPACT=MODIFIER;NEAREST=CEP72
rs72703070	5:590458	C	-	-	-	intergenic_variant	-	-	-	-	-	-	IMPACT=MODIFIER;NEAREST=CEP72
rs72703072	5:590626	G	-	ENSR00000177447	RegulatoryFeature	regulatory_region_variant	-	-	-	-	-	-	IMPACT=MODIFIER;NEAREST=CEP72;BIOTYPE=open_chromatin_region
rs72703072	5:590626	G	-	-	-	intergenic_variant	-	-	-	-	-	-	IMPACT=MODIFIER;NEAREST=CEP72
rs12521091	5:590710	A	-	ENSR00000177447	RegulatoryFeature	regulatory_region_variant	-	-	-	-	-	-	IMPACT=MODIFIER;NEAREST=CEP72;BIOTYPE=open_chromatin_region
rs12521091	5:590710	A	-	-	-	intergenic_variant	-	-	-	-	-	-	IMPACT=MODIFIER;NEAREST=CEP72
rs12522724	5:590742	C	-	ENSR00000177447	RegulatoryFeature	regulatory_region_variant	-	-	-	-	-	-	IMPACT=MODIFIER;NEAREST=CEP72;BIOTYPE=open_chromatin_region
rs12522724	5:590742	C	-	-	-	intergenic_variant	-	-	-	-	-	-	IMPACT=MODIFIER;NEAREST=CEP72
rs56328416	5:591138	A	-	-	-	intergenic_variant	-	-	-	-	-	-	IMPACT=MODIFIER;NEAREST=CEP72
rs72703075	5:592819	T	-	-	-	intergenic_variant	-	-	-	-	-	-	IMPACT=MODIFIER;NEAREST=CEP72
rs111707179	5:593308	A	-	-	-	intergenic_variant	-	-	-	-	-	-	IMPACT=MODIFIER;NEAREST=CEP72
rs11739663	5:594083	C	-	-	-	intergenic_variant	-	-	-	-	-	-	IMPACT=MODIFIER;NEAREST=CEP72
rs72703078	5:594987	C	-	-	-	intergenic_variant	-	-	-	-	-	-	IMPACT=MODIFIER;NEAREST=CEP72
rs72703079	5:595173	C	-	-	-	intergenic_variant	-	-	-	-	-	-	IMPACT=MODIFIER;NEAREST=CEP72
rs72703083	5:595365	T	-	-	-	intergenic_variant	-	-	-	-	-	-	IMPACT=MODIFIER;NEAREST=CEP72
rs10053310	5:595661	G	-	-	-	intergenic_variant	-	-	-	-	-	-	IMPACT=MODIFIER;NEAREST=CEP72
rs55929359	5:595956	G	-	-	-	intergenic_variant	-	-	-	-	-	-	IMPACT=MODIFIER;NEAREST=CEP72
rs58599998	5:596087	G	-	-	-	intergenic_variant	-	-	-	-	-	-	IMPACT=MODIFIER;NEAREST=CEP72
rs56282020	5:596701	C	-	-	-	intergenic_variant	-	-	-	-	-	-	IMPACT=MODIFIER;NEAREST=CEP72
rs6887972	5:597274	G	-	-	-	intergenic_variant	-	-	-	-	-	-	IMPACT=MODIFIER;NEAREST=CEP72
rs61580655	5:597564	G	-	-	-	intergenic_variant	-	-	-	-	-	-	IMPACT=MODIFIER;NEAREST=CEP72
rs57306627	5:597643	C	-	-	-	intergenic_variant	-	-	-	-	-	-	IMPACT=MODIFIER;NEAREST=CEP72
rs60068988	5:597668	C	-	-	-	intergenic_variant	-	-	-	-	-	-	IMPACT=MODIFIER;NEAREST=CEP72
rs72703087	5:598029	T	ENSG00000249650	ENST00000506629	Transcript	downstream_gene_variant	-	-	-	-	-	-	IMPACT=MODIFIER;DISTANCE=4706;STRAND=-1;SYMBOL=RP11-310P5.1;SYMBOL_SOURCE=Clone_based_vega_gene;NEAREST=CEP72
rs72703090	5:598314	T	ENSG00000249650	ENST00000506629	Transcript	downstream_gene_variant	-	-	-	-	-	-	IMPACT=MODIFIER;DISTANCE=4421;STRAND=-1;SYMBOL=RP11-310P5.1;SYMBOL_SOURCE=Clone_based_vega_gene;NEAREST=CEP72
rs11750321	5:599196	T	ENSG00000249650	ENST00000506629	Transcript	downstream_gene_variant	-	-	-	-	-	-	IMPACT=MODIFIER;DISTANCE=3539;STRAND=-1;SYMBOL=RP11-310P5.1;SYMBOL_SOURCE=Clone_based_vega_gene;NEAREST=CEP72
rs72703092	5:599269	A	ENSG00000249650	ENST00000506629	Transcript	downstream_gene_variant	-	-	-	-	-	-	IMPACT=MODIFIER;DISTANCE=3466;STRAND=-1;SYMBOL=RP11-310P5.1;SYMBOL_SOURCE=Clone_based_vega_gene;NEAREST=CEP72
rs72703092	5:599269	A	-	ENSR00000402190	RegulatoryFeature	regulatory_region_variant	-	-	-	-	-	-	IMPACT=MODIFIER;NEAREST=CEP72;BIOTYPE=CTCF_binding_site
rs6883536	5:599274	A	ENSG00000249650	ENST00000506629	Transcript	downstream_gene_variant	-	-	-	-	-	-	IMPACT=MODIFIER;DISTANCE=3461;STRAND=-1;SYMBOL=RP11-310P5.1;SYMBOL_SOURCE=Clone_based_vega_gene;NEAREST=CEP72
rs6883536	5:599274	A	-	ENSR00000402190	RegulatoryFeature	regulatory_region_variant	-	-	-	-	-	-	IMPACT=MODIFIER;NEAREST=CEP72;BIOTYPE=CTCF_binding_site
rs10474792	5:600058	A	ENSG00000249650	ENST00000506629	Transcript	downstream_gene_variant	-	-	-	-	-	-	IMPACT=MODIFIER;DISTANCE=2677;STRAND=-1;SYMBOL=RP11-310P5.1;SYMBOL_SOURCE=Clone_based_vega_gene;NEAREST=CEP72
rs3749615	5:601485	T	ENSG00000249650	ENST00000506629	Transcript	downstream_gene_variant	-	-	-	-	-	-	IMPACT=MODIFIER;DISTANCE=1250;STRAND=-1;SYMBOL=RP11-310P5.1;SYMBOL_SOURCE=Clone_based_vega_gene;NEAREST=CEP72
rs72703095	5:601789	C	ENSG00000249650	ENST00000506629	Transcript	downstream_gene_variant	-	-	-	-	-	-	IMPACT=MODIFIER;DISTANCE=946;STRAND=-1;SYMBOL=RP11-310P5.1;SYMBOL_SOURCE=Clone_based_vega_gene;NEAREST=CEP72
rs3749618	5:602650	G	ENSG00000249650	ENST00000506629	Transcript	downstream_gene_variant	-	-	-	-	-	-	IMPACT=MODIFIER;DISTANCE=85;STRAND=-1;SYMBOL=RP11-310P5.1;SYMBOL_SOURCE=Clone_based_vega_gene;NEAREST=CEP72
rs56221686	5:608706	T	ENSG00000112877	ENST00000264935	Transcript	upstream_gene_variant	-	-	-	-	-	-	IMPACT=MODIFIER;DISTANCE=3681;STRAND=1;SYMBOL=CEP72;SYMBOL_SOURCE=HGNC;HGNC_ID=25547;NEAREST=CEP72
rs56221686	5:608706	T	ENSG00000112877	ENST00000444221	Transcript	upstream_gene_variant	-	-	-	-	-	-	IMPACT=MODIFIER;DISTANCE=3699;STRAND=1;SYMBOL=CEP72;SYMBOL_SOURCE=HGNC;HGNC_ID=25547;NEAREST=CEP72
rs56221686	5:608706	T	ENSG00000249650	ENST00000506629	Transcript	intron_variant,non_coding_transcript_variant	-	-	-	-	-	-	IMPACT=MODIFIER;STRAND=-1;SYMBOL=RP11-310P5.1;SYMBOL_SOURCE=Clone_based_vega_gene;NEAREST=CEP72;INTRON=2/2
rs11739847	5:609661	A	ENSG00000112877	ENST00000264935	Transcript	upstream_gene_variant	-	-	-	-	-	-	IMPACT=MODIFIER;DISTANCE=2726;STRAND=1;SYMBOL=CEP72;SYMBOL_SOURCE=HGNC;HGNC_ID=25547;NEAREST=CEP72
rs11739847	5:609661	A	ENSG00000112877	ENST00000444221	Transcript	upstream_gene_variant	-	-	-	-	-	-	IMPACT=MODIFIER;DISTANCE=2744;STRAND=1;SYMBOL=CEP72;SYMBOL_SOURCE=HGNC;HGNC_ID=25547;NEAREST=CEP72
rs11739847	5:609661	A	ENSG00000249650	ENST00000506629	Transcript	intron_variant,non_coding_transcript_variant	-	-	-	-	-	-	IMPACT=MODIFIER;STRAND=-1;SYMBOL=RP11-310P5.1;SYMBOL_SOURCE=Clone_based_vega_gene;NEAREST=CEP72;INTRON=2/2
rs72703100	5:614291	T	ENSG00000112877	ENST00000264935	Transcript	intron_variant	-	-	-	-	-	-	IMPACT=MODIFIER;STRAND=1;SYMBOL=CEP72;SYMBOL_SOURCE=HGNC;HGNC_ID=25547;NEAREST=CEP72;INTRON=1/11
rs72703100	5:614291	T	ENSG00000112877	ENST00000444221	Transcript	intron_variant	-	-	-	-	-	-	IMPACT=MODIFIER;STRAND=1;SYMBOL=CEP72;SYMBOL_SOURCE=HGNC;HGNC_ID=25547;NEAREST=CEP72;INTRON=1/10
rs72703100	5:614291	T	ENSG00000249650	ENST00000506629	Transcript	upstream_gene_variant	-	-	-	-	-	-	IMPACT=MODIFIER;DISTANCE=1966;STRAND=-1;SYMBOL=RP11-310P5.1;SYMBOL_SOURCE=Clone_based_vega_gene;NEAREST=CEP72
rs7726839	5:618586	G	ENSG00000112877	ENST00000264935	Transcript	intron_variant	-	-	-	-	-	-	IMPACT=MODIFIER;STRAND=1;SYMBOL=CEP72;SYMBOL_SOURCE=HGNC;HGNC_ID=25547;NEAREST=CEP72;INTRON=1/11
rs7726839	5:618586	G	ENSG00000112877	ENST00000444221	Transcript	intron_variant	-	-	-	-	-	-	IMPACT=MODIFIER;STRAND=1;SYMBOL=CEP72;SYMBOL_SOURCE=HGNC;HGNC_ID=25547;NEAREST=CEP72;INTRON=1/10
rs72705014	5:619815	G	ENSG00000112877	ENST00000264935	Transcript	intron_variant	-	-	-	-	-	-	IMPACT=MODIFIER;STRAND=1;SYMBOL=CEP72;SYMBOL_SOURCE=HGNC;HGNC_ID=25547;NEAREST=CEP72;INTRON=2/11
rs72705014	5:619815	G	ENSG00000112877	ENST00000444221	Transcript	intron_variant	-	-	-	-	-	-	IMPACT=MODIFIER;STRAND=1;SYMBOL=CEP72;SYMBOL_SOURCE=HGNC;HGNC_ID=25547;NEAREST=CEP72;INTRON=2/10
rs72705017	5:623733	A	ENSG00000112877	ENST00000264935	Transcript	intron_variant	-	-	-	-	-	-	IMPACT=MODIFIER;STRAND=1;SYMBOL=CEP72;SYMBOL_SOURCE=HGNC;HGNC_ID=25547;NEAREST=CEP72;INTRON=3/11
rs72705017	5:623733	A	ENSG00000112877	ENST00000444221	Transcript	intron_variant	-	-	-	-	-	-	IMPACT=MODIFIER;STRAND=1;SYMBOL=CEP72;SYMBOL_SOURCE=HGNC;HGNC_ID=25547;NEAREST=CEP72;INTRON=3/10
rs12517345	5:628294	A	ENSG00000112877	ENST00000264935	Transcript	intron_variant	-	-	-	-	-	-	IMPACT=MODIFIER;STRAND=1;SYMBOL=CEP72;SYMBOL_SOURCE=HGNC;HGNC_ID=25547;NEAREST=CEP72;INTRON=4/11
rs12517345	5:628294	A	ENSG00000112877	ENST00000444221	Transcript	intron_variant	-	-	-	-	-	-	IMPACT=MODIFIER;STRAND=1;SYMBOL=CEP72;SYMBOL_SOURCE=HGNC;HGNC_ID=25547;NEAREST=CEP72;INTRON=4/10
rs11739866	5:636299	T	ENSG00000112877	ENST00000264935	Transcript	intron_variant	-	-	-	-	-	-	IMPACT=MODIFIER;STRAND=1;SYMBOL=CEP72;SYMBOL_SOURCE=HGNC;HGNC_ID=25547;NEAREST=CEP72;INTRON=6/11
rs11739866	5:636299	T	ENSG00000112877	ENST00000444221	Transcript	intron_variant	-	-	-	-	-	-	IMPACT=MODIFIER;STRAND=1;SYMBOL=CEP72;SYMBOL_SOURCE=HGNC;HGNC_ID=25547;NEAREST=CEP72;INTRON=5/10
rs11134148	5:637107	T	ENSG00000112877	ENST00000264935	Transcript	intron_variant	-	-	-	-	-	-	IMPACT=MODIFIER;STRAND=1;SYMBOL=CEP72;SYMBOL_SOURCE=HGNC;HGNC_ID=25547;NEAREST=CEP72;INTRON=6/11
rs11134148	5:637107	T	ENSG00000112877	ENST00000444221	Transcript	intron_variant	-	-	-	-	-	-	IMPACT=MODIFIER;STRAND=1;SYMBOL=CEP72;SYMBOL_SOURCE=HGNC;HGNC_ID=25547;NEAREST=CEP72;INTRON=5/10
rs11134149	5:637277	G	ENSG00000112877	ENST00000264935	Transcript	intron_variant	-	-	-	-	-	-	IMPACT=MODIFIER;STRAND=1;SYMBOL=CEP72;SYMBOL_SOURCE=HGNC;HGNC_ID=25547;NEAREST=CEP72;INTRON=6/11
rs11134149	5:637277	G	ENSG00000112877	ENST00000444221	Transcript	intron_variant	-	-	-	-	-	-	IMPACT=MODIFIER;STRAND=1;SYMBOL=CEP72;SYMBOL_SOURCE=HGNC;HGNC_ID=25547;NEAREST=CEP72;INTRON=5/10
rs12522955	5:639231	A	ENSG00000112877	ENST00000264935	Transcript	missense_variant	1324	1234	412	P/T	Ccc/Acc	-	IMPACT=MODERATE;STRAND=1;SYMBOL=CEP72;SYMBOL_SOURCE=HGNC;HGNC_ID=25547;NEAREST=CEP72;SIFT=tolerated(0.07);PolyPhen=possibly_damaging(0.755);EXON=8/12
rs12522955	5:639231	A	ENSG00000112877	ENST00000444221	Transcript	3_prime_UTR_variant	1127	-	-	-	-	-	IMPACT=MODIFIER;STRAND=1;SYMBOL=CEP72;SYMBOL_SOURCE=HGNC;HGNC_ID=25547;NEAREST=CEP72;EXON=7/11
rs56325086	5:640728	A	ENSG00000112877	ENST00000264935	Transcript	intron_variant	-	-	-	-	-	-	IMPACT=MODIFIER;STRAND=1;SYMBOL=CEP72;SYMBOL_SOURCE=HGNC;HGNC_ID=25547;NEAREST=AC026740.1;INTRON=9/11
rs56325086	5:640728	A	ENSG00000112877	ENST00000444221	Transcript	intron_variant	-	-	-	-	-	-	IMPACT=MODIFIER;STRAND=1;SYMBOL=CEP72;SYMBOL_SOURCE=HGNC;HGNC_ID=25547;NEAREST=AC026740.1;INTRON=8/10
rs56325086	5:640728	A	ENSG00000112877	ENST00000512038	Transcript	upstream_gene_variant	-	-	-	-	-	-	IMPACT=MODIFIER;DISTANCE=3525;STRAND=1;SYMBOL=CEP72;SYMBOL_SOURCE=HGNC;HGNC_ID=25547;NEAREST=AC026740.1
rs144823843	5:642293	G	ENSG00000112877	ENST00000264935	Transcript	intron_variant	-	-	-	-	-	-	IMPACT=MODIFIER;STRAND=1;SYMBOL=CEP72;SYMBOL_SOURCE=HGNC;HGNC_ID=25547;NEAREST=AC026740.1;INTRON=9/11
rs144823843	5:642293	G	ENSG00000112877	ENST00000444221	Transcript	intron_variant	-	-	-	-	-	-	IMPACT=MODIFIER;STRAND=1;SYMBOL=CEP72;SYMBOL_SOURCE=HGNC;HGNC_ID=25547;NEAREST=AC026740.1;INTRON=8/10
rs144823843	5:642293	G	ENSG00000112877	ENST00000512038	Transcript	upstream_gene_variant	-	-	-	-	-	-	IMPACT=MODIFIER;DISTANCE=1960;STRAND=1;SYMBOL=CEP72;SYMBOL_SOURCE=HGNC;HGNC_ID=25547;NEAREST=AC026740.1
rs3792720	5:643028	G	ENSG00000112877	ENST00000264935	Transcript	intron_variant	-	-	-	-	-	-	IMPACT=MODIFIER;STRAND=1;SYMBOL=CEP72;SYMBOL_SOURCE=HGNC;HGNC_ID=25547;NEAREST=AC026740.1;INTRON=9/11
rs3792720	5:643028	G	ENSG00000112877	ENST00000444221	Transcript	intron_variant	-	-	-	-	-	-	IMPACT=MODIFIER;STRAND=1;SYMBOL=CEP72;SYMBOL_SOURCE=HGNC;HGNC_ID=25547;NEAREST=AC026740.1;INTRON=8/10
rs3792720	5:643028	G	ENSG00000112877	ENST00000512038	Transcript	upstream_gene_variant	-	-	-	-	-	-	IMPACT=MODIFIER;DISTANCE=1225;STRAND=1;SYMBOL=CEP72;SYMBOL_SOURCE=HGNC;HGNC_ID=25547;NEAREST=AC026740.1
rs4957080	5:644552	T	ENSG00000112877	ENST00000264935	Transcript	intron_variant	-	-	-	-	-	-	IMPACT=MODIFIER;STRAND=1;SYMBOL=CEP72;SYMBOL_SOURCE=HGNC;HGNC_ID=25547;NEAREST=AC026740.1;INTRON=10/11
rs4957080	5:644552	T	ENSG00000112877	ENST00000444221	Transcript	intron_variant	-	-	-	-	-	-	IMPACT=MODIFIER;STRAND=1;SYMBOL=CEP72;SYMBOL_SOURCE=HGNC;HGNC_ID=25547;NEAREST=AC026740.1;INTRON=9/10
rs4957080	5:644552	T	ENSG00000112877	ENST00000512038	Transcript	intron_variant,non_coding_transcript_variant	-	-	-	-	-	-	IMPACT=MODIFIER;STRAND=1;SYMBOL=CEP72;SYMBOL_SOURCE=HGNC;HGNC_ID=25547;NEAREST=AC026740.1;INTRON=1/2
rs12517638	5:645484	T	ENSG00000112877	ENST00000264935	Transcript	intron_variant	-	-	-	-	-	-	IMPACT=MODIFIER;STRAND=1;SYMBOL=CEP72;SYMBOL_SOURCE=HGNC;HGNC_ID=25547;NEAREST=AC026740.1;INTRON=10/11
rs12517638	5:645484	T	ENSG00000112877	ENST00000444221	Transcript	intron_variant	-	-	-	-	-	-	IMPACT=MODIFIER;STRAND=1;SYMBOL=CEP72;SYMBOL_SOURCE=HGNC;HGNC_ID=25547;NEAREST=AC026740.1;INTRON=9/10
rs12517638	5:645484	T	ENSG00000112877	ENST00000512038	Transcript	intron_variant,non_coding_transcript_variant	-	-	-	-	-	-	IMPACT=MODIFIER;STRAND=1;SYMBOL=CEP72;SYMBOL_SOURCE=HGNC;HGNC_ID=25547;NEAREST=AC026740.1;INTRON=1/2
rs72705030	5:645562	T	ENSG00000112877	ENST00000264935	Transcript	intron_variant	-	-	-	-	-	-	IMPACT=MODIFIER;STRAND=1;SYMBOL=CEP72;SYMBOL_SOURCE=HGNC;HGNC_ID=25547;NEAREST=AC026740.1;INTRON=10/11
rs72705030	5:645562	T	ENSG00000112877	ENST00000444221	Transcript	intron_variant	-	-	-	-	-	-	IMPACT=MODIFIER;STRAND=1;SYMBOL=CEP72;SYMBOL_SOURCE=HGNC;HGNC_ID=25547;NEAREST=AC026740.1;INTRON=9/10
rs72705030	5:645562	T	ENSG00000112877	ENST00000512038	Transcript	intron_variant,non_coding_transcript_variant	-	-	-	-	-	-	IMPACT=MODIFIER;STRAND=1;SYMBOL=CEP72;SYMBOL_SOURCE=HGNC;HGNC_ID=25547;NEAREST=AC026740.1;INTRON=1/2
rs4957081	5:646418	C	ENSG00000112877	ENST00000264935	Transcript	intron_variant	-	-	-	-	-	-	IMPACT=MODIFIER;STRAND=1;SYMBOL=CEP72;SYMBOL_SOURCE=HGNC;HGNC_ID=25547;NEAREST=AC026740.1;INTRON=10/11
rs4957081	5:646418	C	ENSG00000112877	ENST00000444221	Transcript	intron_variant	-	-	-	-	-	-	IMPACT=MODIFIER;STRAND=1;SYMBOL=CEP72;SYMBOL_SOURCE=HGNC;HGNC_ID=25547;NEAREST=AC026740.1;INTRON=9/10
rs4957081	5:646418	C	ENSG00000112877	ENST00000512038	Transcript	intron_variant,non_coding_transcript_variant	-	-	-	-	-	-	IMPACT=MODIFIER;STRAND=1;SYMBOL=CEP72;SYMBOL_SOURCE=HGNC;HGNC_ID=25547;NEAREST=AC026740.1;INTRON=1/2
rs72705097	5:655067	A	ENSG00000112877	ENST00000264935	Transcript	downstream_gene_variant	-	-	-	-	-	-	IMPACT=MODIFIER;DISTANCE=1399;STRAND=1;SYMBOL=CEP72;SYMBOL_SOURCE=HGNC;HGNC_ID=25547;NEAREST=AC026740.1
rs72705097	5:655067	A	ENSG00000112877	ENST00000444221	Transcript	downstream_gene_variant	-	-	-	-	-	-	IMPACT=MODIFIER;DISTANCE=1403;STRAND=1;SYMBOL=CEP72;SYMBOL_SOURCE=HGNC;HGNC_ID=25547;NEAREST=AC026740.1
rs72705097	5:655067	A	ENSG00000112877	ENST00000499639	Transcript	intron_variant,non_coding_transcript_variant	-	-	-	-	-	-	IMPACT=MODIFIER;STRAND=1;SYMBOL=CEP72;SYMBOL_SOURCE=HGNC;HGNC_ID=25547;NEAREST=AC026740.1;INTRON=1/2
rs72705097	5:655067	A	ENSG00000112877	ENST00000512038	Transcript	downstream_gene_variant	-	-	-	-	-	-	IMPACT=MODIFIER;DISTANCE=1709;STRAND=1;SYMBOL=CEP72;SYMBOL_SOURCE=HGNC;HGNC_ID=25547;NEAREST=AC026740.1
rs72705097	5:655067	A	ENSG00000112877	ENST00000514507	Transcript	upstream_gene_variant	-	-	-	-	-	-	IMPACT=MODIFIER;DISTANCE=503;STRAND=1;SYMBOL=CEP72;SYMBOL_SOURCE=HGNC;HGNC_ID=25547;NEAREST=AC026740.1
rs113896354	5:655438	T	ENSG00000112877	ENST00000264935	Transcript	downstream_gene_variant	-	-	-	-	-	-	IMPACT=MODIFIER;DISTANCE=1770;STRAND=1;SYMBOL=CEP72;SYMBOL_SOURCE=HGNC;HGNC_ID=25547;NEAREST=AC026740.1
rs113896354	5:655438	T	ENSG00000112877	ENST00000444221	Transcript	downstream_gene_variant	-	-	-	-	-	-	IMPACT=MODIFIER;DISTANCE=1774;STRAND=1;SYMBOL=CEP72;SYMBOL_SOURCE=HGNC;HGNC_ID=25547;NEAREST=AC026740.1
rs113896354	5:655438	T	ENSG00000112877	ENST00000499639	Transcript	intron_variant,non_coding_transcript_variant	-	-	-	-	-	-	IMPACT=MODIFIER;STRAND=1;SYMBOL=CEP72;SYMBOL_SOURCE=HGNC;HGNC_ID=25547;NEAREST=AC026740.1;INTRON=1/2
rs113896354	5:655438	T	ENSG00000112877	ENST00000512038	Transcript	downstream_gene_variant	-	-	-	-	-	-	IMPACT=MODIFIER;DISTANCE=2080;STRAND=1;SYMBOL=CEP72;SYMBOL_SOURCE=HGNC;HGNC_ID=25547;NEAREST=AC026740.1
rs113896354	5:655438	T	ENSG00000112877	ENST00000514507	Transcript	upstream_gene_variant	-	-	-	-	-	-	IMPACT=MODIFIER;DISTANCE=132;STRAND=1;SYMBOL=CEP72;SYMBOL_SOURCE=HGNC;HGNC_ID=25547;NEAREST=AC026740.1
rs12520279	5:657291	C	ENSG00000112877	ENST00000264935	Transcript	downstream_gene_variant	-	-	-	-	-	-	IMPACT=MODIFIER;DISTANCE=3623;STRAND=1;SYMBOL=CEP72;SYMBOL_SOURCE=HGNC;HGNC_ID=25547;NEAREST=AC026740.1
rs12520279	5:657291	C	ENSG00000171368	ENST00000360578	Transcript	downstream_gene_variant	-	-	-	-	-	-	IMPACT=MODIFIER;DISTANCE=3592;STRAND=-1;SYMBOL=TPPP;SYMBOL_SOURCE=HGNC;HGNC_ID=24164;NEAREST=AC026740.1
rs12520279	5:657291	C	ENSG00000112877	ENST00000444221	Transcript	downstream_gene_variant	-	-	-	-	-	-	IMPACT=MODIFIER;DISTANCE=3627;STRAND=1;SYMBOL=CEP72;SYMBOL_SOURCE=HGNC;HGNC_ID=25547;NEAREST=AC026740.1
rs12520279	5:657291	C	ENSG00000112877	ENST00000499639	Transcript	downstream_gene_variant	-	-	-	-	-	-	IMPACT=MODIFIER;DISTANCE=83;STRAND=1;SYMBOL=CEP72;SYMBOL_SOURCE=HGNC;HGNC_ID=25547;NEAREST=AC026740.1
rs12520279	5:657291	C	ENSG00000112877	ENST00000512038	Transcript	downstream_gene_variant	-	-	-	-	-	-	IMPACT=MODIFIER;DISTANCE=3933;STRAND=1;SYMBOL=CEP72;SYMBOL_SOURCE=HGNC;HGNC_ID=25547;NEAREST=AC026740.1
rs12520279	5:657291	C	ENSG00000112877	ENST00000514507	Transcript	intron_variant,non_coding_transcript_variant	-	-	-	-	-	-	IMPACT=MODIFIER;STRAND=1;SYMBOL=CEP72;SYMBOL_SOURCE=HGNC;HGNC_ID=25547;NEAREST=AC026740.1;INTRON=1/4
rs4957082	5:658160	T	ENSG00000112877	ENST00000264935	Transcript	downstream_gene_variant	-	-	-	-	-	-	IMPACT=MODIFIER;DISTANCE=4492;STRAND=1;SYMBOL=CEP72;SYMBOL_SOURCE=HGNC;HGNC_ID=25547;NEAREST=AC026740.1
rs4957082	5:658160	T	ENSG00000171368	ENST00000360578	Transcript	downstream_gene_variant	-	-	-	-	-	-	IMPACT=MODIFIER;DISTANCE=2723;STRAND=-1;SYMBOL=TPPP;SYMBOL_SOURCE=HGNC;HGNC_ID=24164;NEAREST=AC026740.1
rs4957082	5:658160	T	ENSG00000112877	ENST00000444221	Transcript	downstream_gene_variant	-	-	-	-	-	-	IMPACT=MODIFIER;DISTANCE=4496;STRAND=1;SYMBOL=CEP72;SYMBOL_SOURCE=HGNC;HGNC_ID=25547;NEAREST=AC026740.1
rs4957082	5:658160	T	ENSG00000112877	ENST00000499639	Transcript	downstream_gene_variant	-	-	-	-	-	-	IMPACT=MODIFIER;DISTANCE=952;STRAND=1;SYMBOL=CEP72;SYMBOL_SOURCE=HGNC;HGNC_ID=25547;NEAREST=AC026740.1
rs4957082	5:658160	T	ENSG00000112877	ENST00000512038	Transcript	downstream_gene_variant	-	-	-	-	-	-	IMPACT=MODIFIER;DISTANCE=4802;STRAND=1;SYMBOL=CEP72;SYMBOL_SOURCE=HGNC;HGNC_ID=25547;NEAREST=AC026740.1
rs4957082	5:658160	T	ENSG00000112877	ENST00000514507	Transcript	intron_variant,non_coding_transcript_variant	-	-	-	-	-	-	IMPACT=MODIFIER;STRAND=1;SYMBOL=CEP72;SYMBOL_SOURCE=HGNC;HGNC_ID=25547;NEAREST=AC026740.1;INTRON=1/4
rs4957083	5:659343	C	ENSG00000171368	ENST00000360578	Transcript	downstream_gene_variant	-	-	-	-	-	-	IMPACT=MODIFIER;DISTANCE=1540;STRAND=-1;SYMBOL=TPPP;SYMBOL_SOURCE=HGNC;HGNC_ID=24164;NEAREST=AC026740.1
rs4957083	5:659343	C	ENSG00000112877	ENST00000499639	Transcript	downstream_gene_variant	-	-	-	-	-	-	IMPACT=MODIFIER;DISTANCE=2135;STRAND=1;SYMBOL=CEP72;SYMBOL_SOURCE=HGNC;HGNC_ID=25547;NEAREST=AC026740.1
rs4957083	5:659343	C	ENSG00000112877	ENST00000514507	Transcript	intron_variant,non_coding_transcript_variant	-	-	-	-	-	-	IMPACT=MODIFIER;STRAND=1;SYMBOL=CEP72;SYMBOL_SOURCE=HGNC;HGNC_ID=25547;NEAREST=AC026740.1;INTRON=1/4
rs72705102	5:659437	C	ENSG00000171368	ENST00000360578	Transcript	downstream_gene_variant	-	-	-	-	-	-	IMPACT=MODIFIER;DISTANCE=1446;STRAND=-1;SYMBOL=TPPP;SYMBOL_SOURCE=HGNC;HGNC_ID=24164;NEAREST=AC026740.1
rs72705102	5:659437	C	ENSG00000112877	ENST00000499639	Transcript	downstream_gene_variant	-	-	-	-	-	-	IMPACT=MODIFIER;DISTANCE=2229;STRAND=1;SYMBOL=CEP72;SYMBOL_SOURCE=HGNC;HGNC_ID=25547;NEAREST=AC026740.1
rs72705102	5:659437	C	ENSG00000112877	ENST00000514507	Transcript	intron_variant,non_coding_transcript_variant	-	-	-	-	-	-	IMPACT=MODIFIER;STRAND=1;SYMBOL=CEP72;SYMBOL_SOURCE=HGNC;HGNC_ID=25547;NEAREST=AC026740.1;INTRON=1/4
rs7558	5:660491	T	ENSG00000171368	ENST00000360578	Transcript	downstream_gene_variant	-	-	-	-	-	-	IMPACT=MODIFIER;DISTANCE=392;STRAND=-1;SYMBOL=TPPP;SYMBOL_SOURCE=HGNC;HGNC_ID=24164;NEAREST=AC026740.1
rs7558	5:660491	T	ENSG00000112877	ENST00000499639	Transcript	downstream_gene_variant	-	-	-	-	-	-	IMPACT=MODIFIER;DISTANCE=3283;STRAND=1;SYMBOL=CEP72;SYMBOL_SOURCE=HGNC;HGNC_ID=25547;NEAREST=AC026740.1
rs7558	5:660491	T	ENSG00000112877	ENST00000514507	Transcript	intron_variant,non_coding_transcript_variant	-	-	-	-	-	-	IMPACT=MODIFIER;STRAND=1;SYMBOL=CEP72;SYMBOL_SOURCE=HGNC;HGNC_ID=25547;NEAREST=AC026740.1;INTRON=1/4
rs7434	5:660804	T	ENSG00000171368	ENST00000360578	Transcript	downstream_gene_variant	-	-	-	-	-	-	IMPACT=MODIFIER;DISTANCE=79;STRAND=-1;SYMBOL=TPPP;SYMBOL_SOURCE=HGNC;HGNC_ID=24164;NEAREST=AC026740.1
rs7434	5:660804	T	ENSG00000112877	ENST00000499639	Transcript	downstream_gene_variant	-	-	-	-	-	-	IMPACT=MODIFIER;DISTANCE=3596;STRAND=1;SYMBOL=CEP72;SYMBOL_SOURCE=HGNC;HGNC_ID=25547;NEAREST=AC026740.1
rs7434	5:660804	T	ENSG00000112877	ENST00000514507	Transcript	intron_variant,non_coding_transcript_variant	-	-	-	-	-	-	IMPACT=MODIFIER;STRAND=1;SYMBOL=CEP72;SYMBOL_SOURCE=HGNC;HGNC_ID=25547;NEAREST=AC026740.1;INTRON=1/4
rs72707007	5:661856	C	ENSG00000171368	ENST00000360578	Transcript	3_prime_UTR_variant	4143	-	-	-	-	-	IMPACT=MODIFIER;STRAND=-1;SYMBOL=TPPP;SYMBOL_SOURCE=HGNC;HGNC_ID=24164;NEAREST=AC026740.1;EXON=4/4
rs72707007	5:661856	C	ENSG00000112877	ENST00000499639	Transcript	downstream_gene_variant	-	-	-	-	-	-	IMPACT=MODIFIER;DISTANCE=4648;STRAND=1;SYMBOL=CEP72;SYMBOL_SOURCE=HGNC;HGNC_ID=25547;NEAREST=AC026740.1
rs72707007	5:661856	C	ENSG00000112877	ENST00000514507	Transcript	intron_variant,non_coding_transcript_variant	-	-	-	-	-	-	IMPACT=MODIFIER;STRAND=1;SYMBOL=CEP72;SYMBOL_SOURCE=HGNC;HGNC_ID=25547;NEAREST=AC026740.1;INTRON=1/4
rs11738281	5:662547	C	ENSG00000171368	ENST00000360578	Transcript	3_prime_UTR_variant	3452	-	-	-	-	-	IMPACT=MODIFIER;STRAND=-1;SYMBOL=TPPP;SYMBOL_SOURCE=HGNC;HGNC_ID=24164;NEAREST=AC026740.1;EXON=4/4
rs11738281	5:662547	C	ENSG00000112877	ENST00000514507	Transcript	intron_variant,non_coding_transcript_variant	-	-	-	-	-	-	IMPACT=MODIFIER;STRAND=1;SYMBOL=CEP72;SYMBOL_SOURCE=HGNC;HGNC_ID=25547;NEAREST=AC026740.1;INTRON=1/4
rs3762951	5:662613	G	ENSG00000171368	ENST00000360578	Transcript	3_prime_UTR_variant	3386	-	-	-	-	-	IMPACT=MODIFIER;STRAND=-1;SYMBOL=TPPP;SYMBOL_SOURCE=HGNC;HGNC_ID=24164;NEAREST=AC026740.1;EXON=4/4
rs3762951	5:662613	G	ENSG00000112877	ENST00000514507	Transcript	intron_variant,non_coding_transcript_variant	-	-	-	-	-	-	IMPACT=MODIFIER;STRAND=1;SYMBOL=CEP72;SYMBOL_SOURCE=HGNC;HGNC_ID=25547;NEAREST=AC026740.1;INTRON=1/4
rs28364691	5:664084	A	ENSG00000171368	ENST00000360578	Transcript	3_prime_UTR_variant	1915	-	-	-	-	-	IMPACT=MODIFIER;STRAND=-1;SYMBOL=TPPP;SYMBOL_SOURCE=HGNC;HGNC_ID=24164;NEAREST=AC026740.1;EXON=4/4
rs28364691	5:664084	A	ENSG00000112877	ENST00000514507	Transcript	intron_variant,non_coding_transcript_variant	-	-	-	-	-	-	IMPACT=MODIFIER;STRAND=1;SYMBOL=CEP72;SYMBOL_SOURCE=HGNC;HGNC_ID=25547;NEAREST=AC026740.1;INTRON=2/4
rs28364691	5:664084	A	ENSG00000268885	ENST00000594226	Transcript	upstream_gene_variant	-	-	-	-	-	-	IMPACT=MODIFIER;DISTANCE=3675;STRAND=1;SYMBOL=AC026740.1;SYMBOL_SOURCE=Clone_based_ensembl_gene;NEAREST=AC026740.1
rs72707016	5:665148	G	ENSG00000171368	ENST00000360578	Transcript	3_prime_UTR_variant	851	-	-	-	-	-	IMPACT=MODIFIER;STRAND=-1;SYMBOL=TPPP;SYMBOL_SOURCE=HGNC;HGNC_ID=24164;NEAREST=AC026740.1;EXON=4/4
rs72707016	5:665148	G	ENSG00000112877	ENST00000514507	Transcript	intron_variant,non_coding_transcript_variant	-	-	-	-	-	-	IMPACT=MODIFIER;STRAND=1;SYMBOL=CEP72;SYMBOL_SOURCE=HGNC;HGNC_ID=25547;NEAREST=AC026740.1;INTRON=2/4
rs72707016	5:665148	G	ENSG00000268885	ENST00000594226	Transcript	upstream_gene_variant	-	-	-	-	-	-	IMPACT=MODIFIER;DISTANCE=2611;STRAND=1;SYMBOL=AC026740.1;SYMBOL_SOURCE=Clone_based_ensembl_gene;NEAREST=AC026740.1
rs61731455	5:665295	G	ENSG00000171368	ENST00000360578	Transcript	synonymous_variant	704	582	194	D	gaT/gaC	-	IMPACT=LOW;STRAND=-1;SYMBOL=TPPP;SYMBOL_SOURCE=HGNC;HGNC_ID=24164;NEAREST=AC026740.1;EXON=4/4
rs61731455	5:665295	G	ENSG00000112877	ENST00000514507	Transcript	splice_region_variant,non_coding_transcript_exon_variant	288	-	-	-	-	-	IMPACT=LOW;STRAND=1;SYMBOL=CEP72;SYMBOL_SOURCE=HGNC;HGNC_ID=25547;NEAREST=AC026740.1;EXON=3/5
rs61731455	5:665295	G	ENSG00000268885	ENST00000594226	Transcript	upstream_gene_variant	-	-	-	-	-	-	IMPACT=MODIFIER;DISTANCE=2464;STRAND=1;SYMBOL=AC026740.1;SYMBOL_SOURCE=Clone_based_ensembl_gene;NEAREST=AC026740.1
rs74553517	5:665671	T	ENSG00000171368	ENST00000360578	Transcript	intron_variant	-	-	-	-	-	-	IMPACT=MODIFIER;STRAND=-1;SYMBOL=TPPP;SYMBOL_SOURCE=HGNC;HGNC_ID=24164;NEAREST=AC026740.1;INTRON=3/3
rs74553517	5:665671	T	ENSG00000112877	ENST00000514507	Transcript	intron_variant,non_coding_transcript_variant	-	-	-	-	-	-	IMPACT=MODIFIER;STRAND=1;SYMBOL=CEP72;SYMBOL_SOURCE=HGNC;HGNC_ID=25547;NEAREST=AC026740.1;INTRON=3/4
rs74553517	5:665671	T	ENSG00000268885	ENST00000594226	Transcript	upstream_gene_variant	-	-	-	-	-	-	IMPACT=MODIFIER;DISTANCE=2088;STRAND=1;SYMBOL=AC026740.1;SYMBOL_SOURCE=Clone_based_ensembl_gene;NEAREST=AC026740.1
rs74553517	5:665671	T	-	ENSR00000177454	RegulatoryFeature	regulatory_region_variant	-	-	-	-	-	-	IMPACT=MODIFIER;NEAREST=AC026740.1;BIOTYPE=open_chromatin_region
rs72707023	5:667620	A	ENSG00000171368	ENST00000360578	Transcript	intron_variant	-	-	-	-	-	-	IMPACT=MODIFIER;STRAND=-1;SYMBOL=TPPP;SYMBOL_SOURCE=HGNC;HGNC_ID=24164;NEAREST=AC026740.1;INTRON=2/3
rs72707023	5:667620	A	ENSG00000112877	ENST00000514507	Transcript	downstream_gene_variant	-	-	-	-	-	-	IMPACT=MODIFIER;DISTANCE=337;STRAND=1;SYMBOL=CEP72;SYMBOL_SOURCE=HGNC;HGNC_ID=25547;NEAREST=AC026740.1
rs72707023	5:667620	A	ENSG00000268885	ENST00000594226	Transcript	upstream_gene_variant	-	-	-	-	-	-	IMPACT=MODIFIER;DISTANCE=139;STRAND=1;SYMBOL=AC026740.1;SYMBOL_SOURCE=Clone_based_ensembl_gene;NEAREST=AC026740.1
rs11749927	5:668842	T	ENSG00000171368	ENST00000360578	Transcript	intron_variant	-	-	-	-	-	-	IMPACT=MODIFIER;STRAND=-1;SYMBOL=TPPP;SYMBOL_SOURCE=HGNC;HGNC_ID=24164;NEAREST=AC026740.1;INTRON=2/3
rs11749927	5:668842	T	ENSG00000112877	ENST00000514507	Transcript	downstream_gene_variant	-	-	-	-	-	-	IMPACT=MODIFIER;DISTANCE=1559;STRAND=1;SYMBOL=CEP72;SYMBOL_SOURCE=HGNC;HGNC_ID=25547;NEAREST=AC026740.1
rs11749927	5:668842	T	ENSG00000268885	ENST00000594226	Transcript	downstream_gene_variant	-	-	-	-	-	-	IMPACT=MODIFIER;DISTANCE=3;STRAND=1;SYMBOL=AC026740.1;SYMBOL_SOURCE=Clone_based_ensembl_gene;NEAREST=AC026740.1
rs77015126	5:670909	A	ENSG00000171368	ENST00000360578	Transcript	intron_variant	-	-	-	-	-	-	IMPACT=MODIFIER;STRAND=-1;SYMBOL=TPPP;SYMBOL_SOURCE=HGNC;HGNC_ID=24164;NEAREST=AC026740.1;INTRON=2/3
rs77015126	5:670909	A	ENSG00000112877	ENST00000514507	Transcript	downstream_gene_variant	-	-	-	-	-	-	IMPACT=MODIFIER;DISTANCE=3626;STRAND=1;SYMBOL=CEP72;SYMBOL_SOURCE=HGNC;HGNC_ID=25547;NEAREST=AC026740.1
rs77015126	5:670909	A	ENSG00000268885	ENST00000594226	Transcript	downstream_gene_variant	-	-	-	-	-	-	IMPACT=MODIFIER;DISTANCE=2070;STRAND=1;SYMBOL=AC026740.1;SYMBOL_SOURCE=Clone_based_ensembl_gene;NEAREST=AC026740.1
rs72707027	5:671294	G	ENSG00000171368	ENST00000360578	Transcript	intron_variant	-	-	-	-	-	-	IMPACT=MODIFIER;STRAND=-1;SYMBOL=TPPP;SYMBOL_SOURCE=HGNC;HGNC_ID=24164;NEAREST=AC026740.1;INTRON=2/3
rs72707027	5:671294	G	ENSG00000112877	ENST00000514507	Transcript	downstream_gene_variant	-	-	-	-	-	-	IMPACT=MODIFIER;DISTANCE=4011;STRAND=1;SYMBOL=CEP72;SYMBOL_SOURCE=HGNC;HGNC_ID=25547;NEAREST=AC026740.1
rs72707027	5:671294	G	ENSG00000268885	ENST00000594226	Transcript	downstream_gene_variant	-	-	-	-	-	-	IMPACT=MODIFIER;DISTANCE=2455;STRAND=1;SYMBOL=AC026740.1;SYMBOL_SOURCE=Clone_based_ensembl_gene;NEAREST=AC026740.1
rs72707027	5:671294	G	ENSG00000271781	ENST00000607068	Transcript	upstream_gene_variant	-	-	-	-	-	-	IMPACT=MODIFIER;DISTANCE=4647;STRAND=1;SYMBOL=CTD-2589H19.6;SYMBOL_SOURCE=Clone_based_vega_gene;NEAREST=AC026740.1
rs72707027	5:671294	G	-	ENSR00000313680	RegulatoryFeature	regulatory_region_variant	-	-	-	-	-	-	IMPACT=MODIFIER;NEAREST=AC026740.1;BIOTYPE=CTCF_binding_site
rs12515813	5:671826	T	ENSG00000171368	ENST00000360578	Transcript	intron_variant	-	-	-	-	-	-	IMPACT=MODIFIER;STRAND=-1;SYMBOL=TPPP;SYMBOL_SOURCE=HGNC;HGNC_ID=24164;NEAREST=AC026740.1;INTRON=2/3
rs12515813	5:671826	T	ENSG00000112877	ENST00000514507	Transcript	downstream_gene_variant	-	-	-	-	-	-	IMPACT=MODIFIER;DISTANCE=4543;STRAND=1;SYMBOL=CEP72;SYMBOL_SOURCE=HGNC;HGNC_ID=25547;NEAREST=AC026740.1
rs12515813	5:671826	T	ENSG00000268885	ENST00000594226	Transcript	downstream_gene_variant	-	-	-	-	-	-	IMPACT=MODIFIER;DISTANCE=2987;STRAND=1;SYMBOL=AC026740.1;SYMBOL_SOURCE=Clone_based_ensembl_gene;NEAREST=AC026740.1
rs12515813	5:671826	T	ENSG00000271781	ENST00000607068	Transcript	upstream_gene_variant	-	-	-	-	-	-	IMPACT=MODIFIER;DISTANCE=4115;STRAND=1;SYMBOL=CTD-2589H19.6;SYMBOL_SOURCE=Clone_based_vega_gene;NEAREST=AC026740.1
rs12515813	5:671826	T	-	ENSR00000177456	RegulatoryFeature	regulatory_region_variant	-	-	-	-	-	-	IMPACT=MODIFIER;NEAREST=AC026740.1;BIOTYPE=promoter_flanking_region
rs12515813	5:671826	T	-	ENSR00000313680	RegulatoryFeature	regulatory_region_variant	-	-	-	-	-	-	IMPACT=MODIFIER;NEAREST=AC026740.1;BIOTYPE=CTCF_binding_site
rs11740553	5:672593	T	ENSG00000171368	ENST00000360578	Transcript	intron_variant	-	-	-	-	-	-	IMPACT=MODIFIER;STRAND=-1;SYMBOL=TPPP;SYMBOL_SOURCE=HGNC;HGNC_ID=24164;NEAREST=AC026740.1;INTRON=2/3
rs11740553	5:672593	T	ENSG00000268885	ENST00000594226	Transcript	downstream_gene_variant	-	-	-	-	-	-	IMPACT=MODIFIER;DISTANCE=3754;STRAND=1;SYMBOL=AC026740.1;SYMBOL_SOURCE=Clone_based_ensembl_gene;NEAREST=AC026740.1
rs11740553	5:672593	T	ENSG00000271781	ENST00000607068	Transcript	upstream_gene_variant	-	-	-	-	-	-	IMPACT=MODIFIER;DISTANCE=3348;STRAND=1;SYMBOL=CTD-2589H19.6;SYMBOL_SOURCE=Clone_based_vega_gene;NEAREST=AC026740.1
rs11740553	5:672593	T	-	ENSR00000177456	RegulatoryFeature	regulatory_region_variant	-	-	-	-	-	-	IMPACT=MODIFIER;NEAREST=AC026740.1;BIOTYPE=promoter_flanking_region
rs11742854	5:674141	G	ENSG00000171368	ENST00000360578	Transcript	intron_variant	-	-	-	-	-	-	IMPACT=MODIFIER;STRAND=-1;SYMBOL=TPPP;SYMBOL_SOURCE=HGNC;HGNC_ID=24164;NEAREST=AC026740.1;INTRON=2/3
rs11742854	5:674141	G	ENSG00000271781	ENST00000607068	Transcript	upstream_gene_variant	-	-	-	-	-	-	IMPACT=MODIFIER;DISTANCE=1800;STRAND=1;SYMBOL=CTD-2589H19.6;SYMBOL_SOURCE=Clone_based_vega_gene;NEAREST=AC026740.1
rs11742854	5:674141	G	-	ENSR00000177456	RegulatoryFeature	regulatory_region_variant	-	-	-	-	-	-	IMPACT=MODIFIER;NEAREST=AC026740.1;BIOTYPE=promoter_flanking_region
rs12516318	5:676423	A	ENSG00000171368	ENST00000360578	Transcript	intron_variant	-	-	-	-	-	-	IMPACT=MODIFIER;STRAND=-1;SYMBOL=TPPP;SYMBOL_SOURCE=HGNC;HGNC_ID=24164;NEAREST=AC026740.1;INTRON=2/3
rs12516318	5:676423	A	ENSG00000271781	ENST00000607068	Transcript	non_coding_transcript_exon_variant	483	-	-	-	-	-	IMPACT=MODIFIER;STRAND=1;SYMBOL=CTD-2589H19.6;SYMBOL_SOURCE=Clone_based_vega_gene;NEAREST=AC026740.1;EXON=1/1
rs12519390	5:676546	G	ENSG00000171368	ENST00000360578	Transcript	intron_variant	-	-	-	-	-	-	IMPACT=MODIFIER;STRAND=-1;SYMBOL=TPPP;SYMBOL_SOURCE=HGNC;HGNC_ID=24164;NEAREST=AC026740.1;INTRON=2/3
rs12519390	5:676546	G	ENSG00000271781	ENST00000607068	Transcript	non_coding_transcript_exon_variant	606	-	-	-	-	-	IMPACT=MODIFIER;STRAND=1;SYMBOL=CTD-2589H19.6;SYMBOL_SOURCE=Clone_based_vega_gene;NEAREST=AC026740.1;EXON=1/1
rs12516404	5:676768	A	ENSG00000171368	ENST00000360578	Transcript	intron_variant	-	-	-	-	-	-	IMPACT=MODIFIER;STRAND=-1;SYMBOL=TPPP;SYMBOL_SOURCE=HGNC;HGNC_ID=24164;NEAREST=AC026740.1;INTRON=2/3
rs12516404	5:676768	A	ENSG00000271781	ENST00000607068	Transcript	downstream_gene_variant	-	-	-	-	-	-	IMPACT=MODIFIER;DISTANCE=37;STRAND=1;SYMBOL=CTD-2589H19.6;SYMBOL_SOURCE=Clone_based_vega_gene;NEAREST=AC026740.1
rs72707041	5:677152	A	ENSG00000171368	ENST00000360578	Transcript	intron_variant	-	-	-	-	-	-	IMPACT=MODIFIER;STRAND=-1;SYMBOL=TPPP;SYMBOL_SOURCE=HGNC;HGNC_ID=24164;NEAREST=AC026740.1;INTRON=2/3
rs72707041	5:677152	A	ENSG00000271781	ENST00000607068	Transcript	downstream_gene_variant	-	-	-	-	-	-	IMPACT=MODIFIER;DISTANCE=421;STRAND=1;SYMBOL=CTD-2589H19.6;SYMBOL_SOURCE=Clone_based_vega_gene;NEAREST=AC026740.1
rs72707043	5:677200	T	ENSG00000171368	ENST00000360578	Transcript	intron_variant	-	-	-	-	-	-	IMPACT=MODIFIER;STRAND=-1;SYMBOL=TPPP;SYMBOL_SOURCE=HGNC;HGNC_ID=24164;NEAREST=AC026740.1;INTRON=2/3
rs72707043	5:677200	T	ENSG00000271781	ENST00000607068	Transcript	downstream_gene_variant	-	-	-	-	-	-	IMPACT=MODIFIER;DISTANCE=469;STRAND=1;SYMBOL=CTD-2589H19.6;SYMBOL_SOURCE=Clone_based_vega_gene;NEAREST=AC026740.1
rs72707044	5:677239	C	ENSG00000171368	ENST00000360578	Transcript	intron_variant	-	-	-	-	-	-	IMPACT=MODIFIER;STRAND=-1;SYMBOL=TPPP;SYMBOL_SOURCE=HGNC;HGNC_ID=24164;NEAREST=AC026740.1;INTRON=2/3
rs72707044	5:677239	C	ENSG00000271781	ENST00000607068	Transcript	downstream_gene_variant	-	-	-	-	-	-	IMPACT=MODIFIER;DISTANCE=508;STRAND=1;SYMBOL=CTD-2589H19.6;SYMBOL_SOURCE=Clone_based_vega_gene;NEAREST=AC026740.1
rs72707044	5:677239	C	-	ENSR00000177457	RegulatoryFeature	regulatory_region_variant	-	-	-	-	-	-	IMPACT=MODIFIER;NEAREST=AC026740.1;BIOTYPE=open_chromatin_region
rs35914637	5:677348	C	ENSG00000171368	ENST00000360578	Transcript	intron_variant	-	-	-	-	-	-	IMPACT=MODIFIER;STRAND=-1;SYMBOL=TPPP;SYMBOL_SOURCE=HGNC;HGNC_ID=24164;NEAREST=AC026740.1;INTRON=2/3
rs35914637	5:677348	C	ENSG00000271781	ENST00000607068	Transcript	downstream_gene_variant	-	-	-	-	-	-	IMPACT=MODIFIER;DISTANCE=617;STRAND=1;SYMBOL=CTD-2589H19.6;SYMBOL_SOURCE=Clone_based_vega_gene;NEAREST=AC026740.1
rs35914637	5:677348	C	-	ENSR00000177457	RegulatoryFeature	regulatory_region_variant	-	-	-	-	-	-	IMPACT=MODIFIER;NEAREST=AC026740.1;BIOTYPE=open_chromatin_region
rs56060145	5:681279	C	ENSG00000171368	ENST00000360578	Transcript	intron_variant	-	-	-	-	-	-	IMPACT=MODIFIER;STRAND=-1;SYMBOL=TPPP;SYMBOL_SOURCE=HGNC;HGNC_ID=24164;NEAREST=TPPP;INTRON=1/3
rs56060145	5:681279	C	ENSG00000271781	ENST00000607068	Transcript	downstream_gene_variant	-	-	-	-	-	-	IMPACT=MODIFIER;DISTANCE=4548;STRAND=1;SYMBOL=CTD-2589H19.6;SYMBOL_SOURCE=Clone_based_vega_gene;NEAREST=TPPP
rs113948530	5:681976	A	ENSG00000171368	ENST00000360578	Transcript	intron_variant	-	-	-	-	-	-	IMPACT=MODIFIER;STRAND=-1;SYMBOL=TPPP;SYMBOL_SOURCE=HGNC;HGNC_ID=24164;NEAREST=TPPP;INTRON=1/3
rs113948530	5:681976	A	-	ENSR00000402195	RegulatoryFeature	regulatory_region_variant	-	-	-	-	-	-	IMPACT=MODIFIER;NEAREST=TPPP;BIOTYPE=CTCF_binding_site
rs72707053	5:684483	T	ENSG00000171368	ENST00000360578	Transcript	intron_variant	-	-	-	-	-	-	IMPACT=MODIFIER;STRAND=-1;SYMBOL=TPPP;SYMBOL_SOURCE=HGNC;HGNC_ID=24164;NEAREST=TPPP;INTRON=1/3
rs55651840	5:684848	A	ENSG00000171368	ENST00000360578	Transcript	intron_variant	-	-	-	-	-	-	IMPACT=MODIFIER;STRAND=-1;SYMBOL=TPPP;SYMBOL_SOURCE=HGNC;HGNC_ID=24164;NEAREST=TPPP;INTRON=1/3
rs55660354	5:684888	C	ENSG00000171368	ENST00000360578	Transcript	intron_variant	-	-	-	-	-	-	IMPACT=MODIFIER;STRAND=-1;SYMBOL=TPPP;SYMBOL_SOURCE=HGNC;HGNC_ID=24164;NEAREST=TPPP;INTRON=1/3
rs11745112	5:685849	A	ENSG00000171368	ENST00000360578	Transcript	intron_variant	-	-	-	-	-	-	IMPACT=MODIFIER;STRAND=-1;SYMBOL=TPPP;SYMBOL_SOURCE=HGNC;HGNC_ID=24164;NEAREST=TPPP;INTRON=1/3
rs35696919	5:686244	A	ENSG00000171368	ENST00000360578	Transcript	intron_variant	-	-	-	-	-	-	IMPACT=MODIFIER;STRAND=-1;SYMBOL=TPPP;SYMBOL_SOURCE=HGNC;HGNC_ID=24164;NEAREST=TPPP;INTRON=1/3
rs56298737	5:698433	G	ENSG00000171368	ENST00000360578	Transcript	upstream_gene_variant	-	-	-	-	-	-	IMPACT=MODIFIER;DISTANCE=4923;STRAND=-1;SYMBOL=TPPP;SYMBOL_SOURCE=HGNC;HGNC_ID=24164;NEAREST=TPPP
rs4957106	5:699427	G	-	-	-	intergenic_variant	-	-	-	-	-	-	IMPACT=MODIFIER;NEAREST=TPPP
rs2860455	5:103802354	A	ENSG00000251574	ENST00000524336	Transcript	intron_variant,non_coding_transcript_variant	-	-	-	-	-	-	IMPACT=MODIFIER;STRAND=-1;SYMBOL=RP11-6N13.1;SYMBOL_SOURCE=Clone_based_vega_gene;NEAREST=NUDT12;INTRON=2/2
rs35313049	5:103806932	C	ENSG00000251574	ENST00000524336	Transcript	intron_variant,non_coding_transcript_variant	-	-	-	-	-	-	IMPACT=MODIFIER;STRAND=-1;SYMBOL=RP11-6N13.1;SYMBOL_SOURCE=Clone_based_vega_gene;NEAREST=NUDT12;INTRON=2/2
rs6881764	5:103810310	A	ENSG00000251574	ENST00000524336	Transcript	intron_variant,non_coding_transcript_variant	-	-	-	-	-	-	IMPACT=MODIFIER;STRAND=-1;SYMBOL=RP11-6N13.1;SYMBOL_SOURCE=Clone_based_vega_gene;NEAREST=NUDT12;INTRON=2/2
rs60734212	5:103812660	A	ENSG00000251574	ENST00000524336	Transcript	intron_variant,non_coding_transcript_variant	-	-	-	-	-	-	IMPACT=MODIFIER;STRAND=-1;SYMBOL=RP11-6N13.1;SYMBOL_SOURCE=Clone_based_vega_gene;NEAREST=NUDT12;INTRON=2/2
rs10040923	5:103822036	A	ENSG00000251574	ENST00000503650	Transcript	intron_variant,non_coding_transcript_variant	-	-	-	-	-	-	IMPACT=MODIFIER;STRAND=-1;SYMBOL=RP11-6N13.1;SYMBOL_SOURCE=Clone_based_vega_gene;NEAREST=NUDT12;INTRON=2/2
rs10040923	5:103822036	A	ENSG00000251574	ENST00000524336	Transcript	intron_variant,non_coding_transcript_variant	-	-	-	-	-	-	IMPACT=MODIFIER;STRAND=-1;SYMBOL=RP11-6N13.1;SYMBOL_SOURCE=Clone_based_vega_gene;NEAREST=NUDT12;INTRON=2/2
rs12719532	5:103822938	G	ENSG00000251574	ENST00000503650	Transcript	intron_variant,non_coding_transcript_variant	-	-	-	-	-	-	IMPACT=MODIFIER;STRAND=-1;SYMBOL=RP11-6N13.1;SYMBOL_SOURCE=Clone_based_vega_gene;NEAREST=NUDT12;INTRON=2/2
rs12719532	5:103822938	G	ENSG00000251574	ENST00000524336	Transcript	intron_variant,non_coding_transcript_variant	-	-	-	-	-	-	IMPACT=MODIFIER;STRAND=-1;SYMBOL=RP11-6N13.1;SYMBOL_SOURCE=Clone_based_vega_gene;NEAREST=NUDT12;INTRON=2/2
rs67909927	5:103827658	G	ENSG00000251574	ENST00000503650	Transcript	intron_variant,non_coding_transcript_variant	-	-	-	-	-	-	IMPACT=MODIFIER;STRAND=-1;SYMBOL=RP11-6N13.1;SYMBOL_SOURCE=Clone_based_vega_gene;NEAREST=NUDT12;INTRON=2/2
rs67909927	5:103827658	G	ENSG00000251574	ENST00000524336	Transcript	intron_variant,non_coding_transcript_variant	-	-	-	-	-	-	IMPACT=MODIFIER;STRAND=-1;SYMBOL=RP11-6N13.1;SYMBOL_SOURCE=Clone_based_vega_gene;NEAREST=NUDT12;INTRON=2/2
rs10464007	5:103831500	A	ENSG00000251574	ENST00000503650	Transcript	intron_variant,non_coding_transcript_variant	-	-	-	-	-	-	IMPACT=MODIFIER;STRAND=-1;SYMBOL=RP11-6N13.1;SYMBOL_SOURCE=Clone_based_vega_gene;NEAREST=NUDT12;INTRON=2/2
rs10464007	5:103831500	A	ENSG00000251574	ENST00000524336	Transcript	intron_variant,non_coding_transcript_variant	-	-	-	-	-	-	IMPACT=MODIFIER;STRAND=-1;SYMBOL=RP11-6N13.1;SYMBOL_SOURCE=Clone_based_vega_gene;NEAREST=NUDT12;INTRON=2/2
rs7706513	5:103832094	A	ENSG00000251574	ENST00000503650	Transcript	intron_variant,non_coding_transcript_variant	-	-	-	-	-	-	IMPACT=MODIFIER;STRAND=-1;SYMBOL=RP11-6N13.1;SYMBOL_SOURCE=Clone_based_vega_gene;NEAREST=NUDT12;INTRON=2/2
rs7706513	5:103832094	A	ENSG00000251574	ENST00000524336	Transcript	intron_variant,non_coding_transcript_variant	-	-	-	-	-	-	IMPACT=MODIFIER;STRAND=-1;SYMBOL=RP11-6N13.1;SYMBOL_SOURCE=Clone_based_vega_gene;NEAREST=NUDT12;INTRON=2/2
rs13165289	5:103836995	C	ENSG00000251574	ENST00000503650	Transcript	intron_variant,non_coding_transcript_variant	-	-	-	-	-	-	IMPACT=MODIFIER;STRAND=-1;SYMBOL=RP11-6N13.1;SYMBOL_SOURCE=Clone_based_vega_gene;NEAREST=NUDT12;INTRON=2/2
rs13165289	5:103836995	C	ENSG00000251574	ENST00000524336	Transcript	intron_variant,non_coding_transcript_variant	-	-	-	-	-	-	IMPACT=MODIFIER;STRAND=-1;SYMBOL=RP11-6N13.1;SYMBOL_SOURCE=Clone_based_vega_gene;NEAREST=NUDT12;INTRON=2/2
rs11747766	5:103838556	G	ENSG00000251574	ENST00000503650	Transcript	intron_variant,non_coding_transcript_variant	-	-	-	-	-	-	IMPACT=MODIFIER;STRAND=-1;SYMBOL=RP11-6N13.1;SYMBOL_SOURCE=Clone_based_vega_gene;NEAREST=NUDT12;INTRON=2/2
rs11747766	5:103838556	G	ENSG00000251574	ENST00000524336	Transcript	intron_variant,non_coding_transcript_variant	-	-	-	-	-	-	IMPACT=MODIFIER;STRAND=-1;SYMBOL=RP11-6N13.1;SYMBOL_SOURCE=Clone_based_vega_gene;NEAREST=NUDT12;INTRON=2/2
rs13187104	5:103841272	G	ENSG00000251574	ENST00000503650	Transcript	intron_variant,non_coding_transcript_variant	-	-	-	-	-	-	IMPACT=MODIFIER;STRAND=-1;SYMBOL=RP11-6N13.1;SYMBOL_SOURCE=Clone_based_vega_gene;NEAREST=NUDT12;INTRON=2/2
rs13187104	5:103841272	G	ENSG00000251574	ENST00000524336	Transcript	intron_variant,non_coding_transcript_variant	-	-	-	-	-	-	IMPACT=MODIFIER;STRAND=-1;SYMBOL=RP11-6N13.1;SYMBOL_SOURCE=Clone_based_vega_gene;NEAREST=NUDT12;INTRON=2/2
rs11958220	5:103843517	T	ENSG00000251574	ENST00000503650	Transcript	intron_variant,non_coding_transcript_variant	-	-	-	-	-	-	IMPACT=MODIFIER;STRAND=-1;SYMBOL=RP11-6N13.1;SYMBOL_SOURCE=Clone_based_vega_gene;NEAREST=NUDT12;INTRON=2/2
rs11958220	5:103843517	T	ENSG00000251574	ENST00000524336	Transcript	intron_variant,non_coding_transcript_variant	-	-	-	-	-	-	IMPACT=MODIFIER;STRAND=-1;SYMBOL=RP11-6N13.1;SYMBOL_SOURCE=Clone_based_vega_gene;NEAREST=NUDT12;INTRON=2/2
rs11747125	5:103847569	T	ENSG00000251574	ENST00000503650	Transcript	intron_variant,non_coding_transcript_variant	-	-	-	-	-	-	IMPACT=MODIFIER;STRAND=-1;SYMBOL=RP11-6N13.1;SYMBOL_SOURCE=Clone_based_vega_gene;NEAREST=NUDT12;INTRON=2/2
rs11747125	5:103847569	T	ENSG00000251574	ENST00000524336	Transcript	intron_variant,non_coding_transcript_variant	-	-	-	-	-	-	IMPACT=MODIFIER;STRAND=-1;SYMBOL=RP11-6N13.1;SYMBOL_SOURCE=Clone_based_vega_gene;NEAREST=NUDT12;INTRON=2/2
rs4703307	5:103848762	A	ENSG00000251574	ENST00000503650	Transcript	intron_variant,non_coding_transcript_variant	-	-	-	-	-	-	IMPACT=MODIFIER;STRAND=-1;SYMBOL=RP11-6N13.1;SYMBOL_SOURCE=Clone_based_vega_gene;NEAREST=NUDT12;INTRON=2/2
rs4703307	5:103848762	A	ENSG00000251574	ENST00000524336	Transcript	intron_variant,non_coding_transcript_variant	-	-	-	-	-	-	IMPACT=MODIFIER;STRAND=-1;SYMBOL=RP11-6N13.1;SYMBOL_SOURCE=Clone_based_vega_gene;NEAREST=NUDT12;INTRON=2/2
rs4703307	5:103848762	A	-	ENSR00000184781	RegulatoryFeature	regulatory_region_variant	-	-	-	-	-	-	IMPACT=MODIFIER;NEAREST=NUDT12;BIOTYPE=open_chromatin_region
rs11955377	5:103861597	C	ENSG00000251574	ENST00000503650	Transcript	intron_variant,non_coding_transcript_variant	-	-	-	-	-	-	IMPACT=MODIFIER;STRAND=-1;SYMBOL=RP11-6N13.1;SYMBOL_SOURCE=Clone_based_vega_gene;NEAREST=NUDT12;INTRON=2/2
rs11955377	5:103861597	C	ENSG00000251574	ENST00000524336	Transcript	intron_variant,non_coding_transcript_variant	-	-	-	-	-	-	IMPACT=MODIFIER;STRAND=-1;SYMBOL=RP11-6N13.1;SYMBOL_SOURCE=Clone_based_vega_gene;NEAREST=NUDT12;INTRON=2/2
rs969397	5:103863877	A	ENSG00000251574	ENST00000503650	Transcript	intron_variant,non_coding_transcript_variant	-	-	-	-	-	-	IMPACT=MODIFIER;STRAND=-1;SYMBOL=RP11-6N13.1;SYMBOL_SOURCE=Clone_based_vega_gene;NEAREST=NUDT12;INTRON=2/2
rs969397	5:103863877	A	ENSG00000251574	ENST00000524336	Transcript	intron_variant,non_coding_transcript_variant	-	-	-	-	-	-	IMPACT=MODIFIER;STRAND=-1;SYMBOL=RP11-6N13.1;SYMBOL_SOURCE=Clone_based_vega_gene;NEAREST=NUDT12;INTRON=2/2
rs35319957	5:103864338	C	ENSG00000251574	ENST00000503650	Transcript	intron_variant,non_coding_transcript_variant	-	-	-	-	-	-	IMPACT=MODIFIER;STRAND=-1;SYMBOL=RP11-6N13.1;SYMBOL_SOURCE=Clone_based_vega_gene;NEAREST=NUDT12;INTRON=2/2
rs35319957	5:103864338	C	ENSG00000251574	ENST00000524336	Transcript	intron_variant,non_coding_transcript_variant	-	-	-	-	-	-	IMPACT=MODIFIER;STRAND=-1;SYMBOL=RP11-6N13.1;SYMBOL_SOURCE=Clone_based_vega_gene;NEAREST=NUDT12;INTRON=2/2
rs1363098	5:103867339	A	ENSG00000251574	ENST00000503650	Transcript	intron_variant,non_coding_transcript_variant	-	-	-	-	-	-	IMPACT=MODIFIER;STRAND=-1;SYMBOL=RP11-6N13.1;SYMBOL_SOURCE=Clone_based_vega_gene;NEAREST=NUDT12;INTRON=2/2
rs1363098	5:103867339	A	ENSG00000251574	ENST00000524336	Transcript	intron_variant,non_coding_transcript_variant	-	-	-	-	-	-	IMPACT=MODIFIER;STRAND=-1;SYMBOL=RP11-6N13.1;SYMBOL_SOURCE=Clone_based_vega_gene;NEAREST=NUDT12;INTRON=2/2
rs6870957	5:103868240	G	ENSG00000251574	ENST00000503650	Transcript	intron_variant,non_coding_transcript_variant	-	-	-	-	-	-	IMPACT=MODIFIER;STRAND=-1;SYMBOL=RP11-6N13.1;SYMBOL_SOURCE=Clone_based_vega_gene;NEAREST=NUDT12;INTRON=2/2
rs6870957	5:103868240	G	ENSG00000251574	ENST00000524336	Transcript	intron_variant,non_coding_transcript_variant	-	-	-	-	-	-	IMPACT=MODIFIER;STRAND=-1;SYMBOL=RP11-6N13.1;SYMBOL_SOURCE=Clone_based_vega_gene;NEAREST=NUDT12;INTRON=2/2
rs1582419	5:103870101	C	ENSG00000251574	ENST00000503650	Transcript	intron_variant,non_coding_transcript_variant	-	-	-	-	-	-	IMPACT=MODIFIER;STRAND=-1;SYMBOL=RP11-6N13.1;SYMBOL_SOURCE=Clone_based_vega_gene;NEAREST=NUDT12;INTRON=2/2
rs1582419	5:103870101	C	ENSG00000251574	ENST00000524336	Transcript	intron_variant,non_coding_transcript_variant	-	-	-	-	-	-	IMPACT=MODIFIER;STRAND=-1;SYMBOL=RP11-6N13.1;SYMBOL_SOURCE=Clone_based_vega_gene;NEAREST=NUDT12;INTRON=2/2
rs4515268	5:103874262	G	ENSG00000251574	ENST00000503650	Transcript	intron_variant,non_coding_transcript_variant	-	-	-	-	-	-	IMPACT=MODIFIER;STRAND=-1;SYMBOL=RP11-6N13.1;SYMBOL_SOURCE=Clone_based_vega_gene;NEAREST=NUDT12;INTRON=2/2
rs4515268	5:103874262	G	ENSG00000251574	ENST00000524336	Transcript	intron_variant,non_coding_transcript_variant	-	-	-	-	-	-	IMPACT=MODIFIER;STRAND=-1;SYMBOL=RP11-6N13.1;SYMBOL_SOURCE=Clone_based_vega_gene;NEAREST=NUDT12;INTRON=2/2
rs1363097	5:103875902	T	ENSG00000251574	ENST00000503650	Transcript	intron_variant,non_coding_transcript_variant	-	-	-	-	-	-	IMPACT=MODIFIER;STRAND=-1;SYMBOL=RP11-6N13.1;SYMBOL_SOURCE=Clone_based_vega_gene;NEAREST=NUDT12;INTRON=2/2
rs1363097	5:103875902	T	ENSG00000251574	ENST00000524336	Transcript	intron_variant,non_coding_transcript_variant	-	-	-	-	-	-	IMPACT=MODIFIER;STRAND=-1;SYMBOL=RP11-6N13.1;SYMBOL_SOURCE=Clone_based_vega_gene;NEAREST=NUDT12;INTRON=2/2
rs1363096	5:103876193	A	ENSG00000251574	ENST00000503650	Transcript	intron_variant,non_coding_transcript_variant	-	-	-	-	-	-	IMPACT=MODIFIER;STRAND=-1;SYMBOL=RP11-6N13.1;SYMBOL_SOURCE=Clone_based_vega_gene;NEAREST=NUDT12;INTRON=2/2
rs1363096	5:103876193	A	ENSG00000251574	ENST00000524336	Transcript	intron_variant,non_coding_transcript_variant	-	-	-	-	-	-	IMPACT=MODIFIER;STRAND=-1;SYMBOL=RP11-6N13.1;SYMBOL_SOURCE=Clone_based_vega_gene;NEAREST=NUDT12;INTRON=2/2
rs7731266	5:103877918	C	ENSG00000251574	ENST00000503650	Transcript	intron_variant,non_coding_transcript_variant	-	-	-	-	-	-	IMPACT=MODIFIER;STRAND=-1;SYMBOL=RP11-6N13.1;SYMBOL_SOURCE=Clone_based_vega_gene;NEAREST=NUDT12;INTRON=2/2
rs7731266	5:103877918	C	ENSG00000251574	ENST00000524336	Transcript	intron_variant,non_coding_transcript_variant	-	-	-	-	-	-	IMPACT=MODIFIER;STRAND=-1;SYMBOL=RP11-6N13.1;SYMBOL_SOURCE=Clone_based_vega_gene;NEAREST=NUDT12;INTRON=2/2
rs4482879	5:103878652	C	ENSG00000251574	ENST00000503650	Transcript	intron_variant,non_coding_transcript_variant	-	-	-	-	-	-	IMPACT=MODIFIER;STRAND=-1;SYMBOL=RP11-6N13.1;SYMBOL_SOURCE=Clone_based_vega_gene;NEAREST=NUDT12;INTRON=2/2
rs4482879	5:103878652	C	ENSG00000251574	ENST00000524336	Transcript	intron_variant,non_coding_transcript_variant	-	-	-	-	-	-	IMPACT=MODIFIER;STRAND=-1;SYMBOL=RP11-6N13.1;SYMBOL_SOURCE=Clone_based_vega_gene;NEAREST=NUDT12;INTRON=2/2
rs4703040	5:103879813	T	ENSG00000251574	ENST00000503650	Transcript	intron_variant,non_coding_transcript_variant	-	-	-	-	-	-	IMPACT=MODIFIER;STRAND=-1;SYMBOL=RP11-6N13.1;SYMBOL_SOURCE=Clone_based_vega_gene;NEAREST=NUDT12;INTRON=2/2
rs4703040	5:103879813	T	ENSG00000251574	ENST00000524336	Transcript	intron_variant,non_coding_transcript_variant	-	-	-	-	-	-	IMPACT=MODIFIER;STRAND=-1;SYMBOL=RP11-6N13.1;SYMBOL_SOURCE=Clone_based_vega_gene;NEAREST=NUDT12;INTRON=2/2
rs6869862	5:103886213	G	ENSG00000251574	ENST00000503650	Transcript	intron_variant,non_coding_transcript_variant	-	-	-	-	-	-	IMPACT=MODIFIER;STRAND=-1;SYMBOL=RP11-6N13.1;SYMBOL_SOURCE=Clone_based_vega_gene;NEAREST=NUDT12;INTRON=2/2
rs6869862	5:103886213	G	ENSG00000251574	ENST00000524336	Transcript	intron_variant,non_coding_transcript_variant	-	-	-	-	-	-	IMPACT=MODIFIER;STRAND=-1;SYMBOL=RP11-6N13.1;SYMBOL_SOURCE=Clone_based_vega_gene;NEAREST=NUDT12;INTRON=2/2
rs6867409	5:103890096	T	ENSG00000251574	ENST00000503650	Transcript	intron_variant,non_coding_transcript_variant	-	-	-	-	-	-	IMPACT=MODIFIER;STRAND=-1;SYMBOL=RP11-6N13.1;SYMBOL_SOURCE=Clone_based_vega_gene;NEAREST=NUDT12;INTRON=2/2
rs6867409	5:103890096	T	ENSG00000251574	ENST00000524336	Transcript	intron_variant,non_coding_transcript_variant	-	-	-	-	-	-	IMPACT=MODIFIER;STRAND=-1;SYMBOL=RP11-6N13.1;SYMBOL_SOURCE=Clone_based_vega_gene;NEAREST=NUDT12;INTRON=2/2
rs2193933	5:103892460	G	ENSG00000251574	ENST00000503650	Transcript	intron_variant,non_coding_transcript_variant	-	-	-	-	-	-	IMPACT=MODIFIER;STRAND=-1;SYMBOL=RP11-6N13.1;SYMBOL_SOURCE=Clone_based_vega_gene;NEAREST=NUDT12;INTRON=2/2
rs2193933	5:103892460	G	ENSG00000251574	ENST00000524336	Transcript	intron_variant,non_coding_transcript_variant	-	-	-	-	-	-	IMPACT=MODIFIER;STRAND=-1;SYMBOL=RP11-6N13.1;SYMBOL_SOURCE=Clone_based_vega_gene;NEAREST=NUDT12;INTRON=2/2
rs1592756	5:103892988	T	ENSG00000251574	ENST00000503650	Transcript	intron_variant,non_coding_transcript_variant	-	-	-	-	-	-	IMPACT=MODIFIER;STRAND=-1;SYMBOL=RP11-6N13.1;SYMBOL_SOURCE=Clone_based_vega_gene;NEAREST=NUDT12;INTRON=2/2
rs1592756	5:103892988	T	ENSG00000251574	ENST00000524336	Transcript	intron_variant,non_coding_transcript_variant	-	-	-	-	-	-	IMPACT=MODIFIER;STRAND=-1;SYMBOL=RP11-6N13.1;SYMBOL_SOURCE=Clone_based_vega_gene;NEAREST=NUDT12;INTRON=2/2
rs1592755	5:103893548	A	ENSG00000251574	ENST00000503650	Transcript	intron_variant,non_coding_transcript_variant	-	-	-	-	-	-	IMPACT=MODIFIER;STRAND=-1;SYMBOL=RP11-6N13.1;SYMBOL_SOURCE=Clone_based_vega_gene;NEAREST=NUDT12;INTRON=2/2
rs1592755	5:103893548	A	ENSG00000251574	ENST00000524336	Transcript	intron_variant,non_coding_transcript_variant	-	-	-	-	-	-	IMPACT=MODIFIER;STRAND=-1;SYMBOL=RP11-6N13.1;SYMBOL_SOURCE=Clone_based_vega_gene;NEAREST=NUDT12;INTRON=2/2
rs7706353	5:103895016	T	ENSG00000251574	ENST00000503650	Transcript	intron_variant,non_coding_transcript_variant	-	-	-	-	-	-	IMPACT=MODIFIER;STRAND=-1;SYMBOL=RP11-6N13.1;SYMBOL_SOURCE=Clone_based_vega_gene;NEAREST=NUDT12;INTRON=2/2
rs7706353	5:103895016	T	ENSG00000251574	ENST00000524336	Transcript	intron_variant,non_coding_transcript_variant	-	-	-	-	-	-	IMPACT=MODIFIER;STRAND=-1;SYMBOL=RP11-6N13.1;SYMBOL_SOURCE=Clone_based_vega_gene;NEAREST=NUDT12;INTRON=2/2
rs4438849	5:103895102	G	ENSG00000251574	ENST00000503650	Transcript	intron_variant,non_coding_transcript_variant	-	-	-	-	-	-	IMPACT=MODIFIER;STRAND=-1;SYMBOL=RP11-6N13.1;SYMBOL_SOURCE=Clone_based_vega_gene;NEAREST=NUDT12;INTRON=2/2
rs4438849	5:103895102	G	ENSG00000251574	ENST00000524336	Transcript	intron_variant,non_coding_transcript_variant	-	-	-	-	-	-	IMPACT=MODIFIER;STRAND=-1;SYMBOL=RP11-6N13.1;SYMBOL_SOURCE=Clone_based_vega_gene;NEAREST=NUDT12;INTRON=2/2
rs4320234	5:103895115	C	ENSG00000251574	ENST00000503650	Transcript	intron_variant,non_coding_transcript_variant	-	-	-	-	-	-	IMPACT=MODIFIER;STRAND=-1;SYMBOL=RP11-6N13.1;SYMBOL_SOURCE=Clone_based_vega_gene;NEAREST=NUDT12;INTRON=2/2
rs4320234	5:103895115	C	ENSG00000251574	ENST00000524336	Transcript	intron_variant,non_coding_transcript_variant	-	-	-	-	-	-	IMPACT=MODIFIER;STRAND=-1;SYMBOL=RP11-6N13.1;SYMBOL_SOURCE=Clone_based_vega_gene;NEAREST=NUDT12;INTRON=2/2
rs1833514	5:103896130	C	ENSG00000251574	ENST00000503650	Transcript	intron_variant,non_coding_transcript_variant	-	-	-	-	-	-	IMPACT=MODIFIER;STRAND=-1;SYMBOL=RP11-6N13.1;SYMBOL_SOURCE=Clone_based_vega_gene;NEAREST=NUDT12;INTRON=2/2
rs1833514	5:103896130	C	ENSG00000251574	ENST00000524336	Transcript	intron_variant,non_coding_transcript_variant	-	-	-	-	-	-	IMPACT=MODIFIER;STRAND=-1;SYMBOL=RP11-6N13.1;SYMBOL_SOURCE=Clone_based_vega_gene;NEAREST=NUDT12;INTRON=2/2
rs4521446	5:103897758	C	ENSG00000251574	ENST00000503650	Transcript	intron_variant,non_coding_transcript_variant	-	-	-	-	-	-	IMPACT=MODIFIER;STRAND=-1;SYMBOL=RP11-6N13.1;SYMBOL_SOURCE=Clone_based_vega_gene;NEAREST=NUDT12;INTRON=2/2
rs4521446	5:103897758	C	ENSG00000251574	ENST00000524336	Transcript	intron_variant,non_coding_transcript_variant	-	-	-	-	-	-	IMPACT=MODIFIER;STRAND=-1;SYMBOL=RP11-6N13.1;SYMBOL_SOURCE=Clone_based_vega_gene;NEAREST=NUDT12;INTRON=2/2
rs6596578	5:103899178	G	ENSG00000251574	ENST00000503650	Transcript	intron_variant,non_coding_transcript_variant	-	-	-	-	-	-	IMPACT=MODIFIER;STRAND=-1;SYMBOL=RP11-6N13.1;SYMBOL_SOURCE=Clone_based_vega_gene;NEAREST=NUDT12;INTRON=2/2
rs6596578	5:103899178	G	ENSG00000251574	ENST00000524336	Transcript	intron_variant,non_coding_transcript_variant	-	-	-	-	-	-	IMPACT=MODIFIER;STRAND=-1;SYMBOL=RP11-6N13.1;SYMBOL_SOURCE=Clone_based_vega_gene;NEAREST=NUDT12;INTRON=2/2
rs6874138	5:103899596	C	ENSG00000251574	ENST00000503650	Transcript	intron_variant,non_coding_transcript_variant	-	-	-	-	-	-	IMPACT=MODIFIER;STRAND=-1;SYMBOL=RP11-6N13.1;SYMBOL_SOURCE=Clone_based_vega_gene;NEAREST=NUDT12;INTRON=2/2
rs6874138	5:103899596	C	ENSG00000251574	ENST00000524336	Transcript	intron_variant,non_coding_transcript_variant	-	-	-	-	-	-	IMPACT=MODIFIER;STRAND=-1;SYMBOL=RP11-6N13.1;SYMBOL_SOURCE=Clone_based_vega_gene;NEAREST=NUDT12;INTRON=2/2
rs10064425	5:103899690	C	ENSG00000251574	ENST00000503650	Transcript	intron_variant,non_coding_transcript_variant	-	-	-	-	-	-	IMPACT=MODIFIER;STRAND=-1;SYMBOL=RP11-6N13.1;SYMBOL_SOURCE=Clone_based_vega_gene;NEAREST=NUDT12;INTRON=2/2
rs10064425	5:103899690	C	ENSG00000251574	ENST00000524336	Transcript	intron_variant,non_coding_transcript_variant	-	-	-	-	-	-	IMPACT=MODIFIER;STRAND=-1;SYMBOL=RP11-6N13.1;SYMBOL_SOURCE=Clone_based_vega_gene;NEAREST=NUDT12;INTRON=2/2
rs10059133	5:103901424	T	ENSG00000251574	ENST00000503650	Transcript	intron_variant,non_coding_transcript_variant	-	-	-	-	-	-	IMPACT=MODIFIER;STRAND=-1;SYMBOL=RP11-6N13.1;SYMBOL_SOURCE=Clone_based_vega_gene;NEAREST=NUDT12;INTRON=2/2
rs10059133	5:103901424	T	ENSG00000251574	ENST00000524336	Transcript	intron_variant,non_coding_transcript_variant	-	-	-	-	-	-	IMPACT=MODIFIER;STRAND=-1;SYMBOL=RP11-6N13.1;SYMBOL_SOURCE=Clone_based_vega_gene;NEAREST=NUDT12;INTRON=2/2
rs6865511	5:103902180	T	ENSG00000251574	ENST00000503650	Transcript	intron_variant,non_coding_transcript_variant	-	-	-	-	-	-	IMPACT=MODIFIER;STRAND=-1;SYMBOL=RP11-6N13.1;SYMBOL_SOURCE=Clone_based_vega_gene;NEAREST=NUDT12;INTRON=2/2
rs6865511	5:103902180	T	ENSG00000251574	ENST00000524336	Transcript	intron_variant,non_coding_transcript_variant	-	-	-	-	-	-	IMPACT=MODIFIER;STRAND=-1;SYMBOL=RP11-6N13.1;SYMBOL_SOURCE=Clone_based_vega_gene;NEAREST=NUDT12;INTRON=2/2
rs1421668	5:103902958	T	ENSG00000251574	ENST00000503650	Transcript	intron_variant,non_coding_transcript_variant	-	-	-	-	-	-	IMPACT=MODIFIER;STRAND=-1;SYMBOL=RP11-6N13.1;SYMBOL_SOURCE=Clone_based_vega_gene;NEAREST=NUDT12;INTRON=2/2
rs1421668	5:103902958	T	ENSG00000251574	ENST00000524336	Transcript	intron_variant,non_coding_transcript_variant	-	-	-	-	-	-	IMPACT=MODIFIER;STRAND=-1;SYMBOL=RP11-6N13.1;SYMBOL_SOURCE=Clone_based_vega_gene;NEAREST=NUDT12;INTRON=2/2
rs6891820	5:103903148	G	ENSG00000251574	ENST00000503650	Transcript	intron_variant,non_coding_transcript_variant	-	-	-	-	-	-	IMPACT=MODIFIER;STRAND=-1;SYMBOL=RP11-6N13.1;SYMBOL_SOURCE=Clone_based_vega_gene;NEAREST=NUDT12;INTRON=2/2
rs6891820	5:103903148	G	ENSG00000251574	ENST00000524336	Transcript	intron_variant,non_coding_transcript_variant	-	-	-	-	-	-	IMPACT=MODIFIER;STRAND=-1;SYMBOL=RP11-6N13.1;SYMBOL_SOURCE=Clone_based_vega_gene;NEAREST=NUDT12;INTRON=2/2
rs12659431	5:103903766	A	ENSG00000251574	ENST00000503650	Transcript	intron_variant,non_coding_transcript_variant	-	-	-	-	-	-	IMPACT=MODIFIER;STRAND=-1;SYMBOL=RP11-6N13.1;SYMBOL_SOURCE=Clone_based_vega_gene;NEAREST=NUDT12;INTRON=2/2
rs12659431	5:103903766	A	ENSG00000251574	ENST00000524336	Transcript	intron_variant,non_coding_transcript_variant	-	-	-	-	-	-	IMPACT=MODIFIER;STRAND=-1;SYMBOL=RP11-6N13.1;SYMBOL_SOURCE=Clone_based_vega_gene;NEAREST=NUDT12;INTRON=2/2
rs12657531	5:103903837	G	ENSG00000251574	ENST00000503650	Transcript	intron_variant,non_coding_transcript_variant	-	-	-	-	-	-	IMPACT=MODIFIER;STRAND=-1;SYMBOL=RP11-6N13.1;SYMBOL_SOURCE=Clone_based_vega_gene;NEAREST=NUDT12;INTRON=2/2
rs12657531	5:103903837	G	ENSG00000251574	ENST00000524336	Transcript	intron_variant,non_coding_transcript_variant	-	-	-	-	-	-	IMPACT=MODIFIER;STRAND=-1;SYMBOL=RP11-6N13.1;SYMBOL_SOURCE=Clone_based_vega_gene;NEAREST=NUDT12;INTRON=2/2
rs12658007	5:103904034	G	ENSG00000251574	ENST00000503650	Transcript	intron_variant,non_coding_transcript_variant	-	-	-	-	-	-	IMPACT=MODIFIER;STRAND=-1;SYMBOL=RP11-6N13.1;SYMBOL_SOURCE=Clone_based_vega_gene;NEAREST=NUDT12;INTRON=2/2
rs12658007	5:103904034	G	ENSG00000251574	ENST00000524336	Transcript	intron_variant,non_coding_transcript_variant	-	-	-	-	-	-	IMPACT=MODIFIER;STRAND=-1;SYMBOL=RP11-6N13.1;SYMBOL_SOURCE=Clone_based_vega_gene;NEAREST=NUDT12;INTRON=2/2
rs12658451	5:103904037	C	ENSG00000251574	ENST00000503650	Transcript	intron_variant,non_coding_transcript_variant	-	-	-	-	-	-	IMPACT=MODIFIER;STRAND=-1;SYMBOL=RP11-6N13.1;SYMBOL_SOURCE=Clone_based_vega_gene;NEAREST=NUDT12;INTRON=2/2
rs12658451	5:103904037	C	ENSG00000251574	ENST00000524336	Transcript	intron_variant,non_coding_transcript_variant	-	-	-	-	-	-	IMPACT=MODIFIER;STRAND=-1;SYMBOL=RP11-6N13.1;SYMBOL_SOURCE=Clone_based_vega_gene;NEAREST=NUDT12;INTRON=2/2
rs12658019	5:103904108	G	ENSG00000251574	ENST00000503650	Transcript	intron_variant,non_coding_transcript_variant	-	-	-	-	-	-	IMPACT=MODIFIER;STRAND=-1;SYMBOL=RP11-6N13.1;SYMBOL_SOURCE=Clone_based_vega_gene;NEAREST=NUDT12;INTRON=2/2
rs12658019	5:103904108	G	ENSG00000251574	ENST00000524336	Transcript	intron_variant,non_coding_transcript_variant	-	-	-	-	-	-	IMPACT=MODIFIER;STRAND=-1;SYMBOL=RP11-6N13.1;SYMBOL_SOURCE=Clone_based_vega_gene;NEAREST=NUDT12;INTRON=2/2
rs11242522	5:103904914	C	ENSG00000251574	ENST00000503650	Transcript	intron_variant,non_coding_transcript_variant	-	-	-	-	-	-	IMPACT=MODIFIER;STRAND=-1;SYMBOL=RP11-6N13.1;SYMBOL_SOURCE=Clone_based_vega_gene;NEAREST=NUDT12;INTRON=2/2
rs11242522	5:103904914	C	ENSG00000251574	ENST00000524336	Transcript	intron_variant,non_coding_transcript_variant	-	-	-	-	-	-	IMPACT=MODIFIER;STRAND=-1;SYMBOL=RP11-6N13.1;SYMBOL_SOURCE=Clone_based_vega_gene;NEAREST=NUDT12;INTRON=2/2
rs11242523	5:103905025	A	ENSG00000251574	ENST00000503650	Transcript	intron_variant,non_coding_transcript_variant	-	-	-	-	-	-	IMPACT=MODIFIER;STRAND=-1;SYMBOL=RP11-6N13.1;SYMBOL_SOURCE=Clone_based_vega_gene;NEAREST=NUDT12;INTRON=2/2
rs11242523	5:103905025	A	ENSG00000251574	ENST00000524336	Transcript	intron_variant,non_coding_transcript_variant	-	-	-	-	-	-	IMPACT=MODIFIER;STRAND=-1;SYMBOL=RP11-6N13.1;SYMBOL_SOURCE=Clone_based_vega_gene;NEAREST=NUDT12;INTRON=2/2
rs12515429	5:103905275	T	ENSG00000251574	ENST00000503650	Transcript	intron_variant,non_coding_transcript_variant	-	-	-	-	-	-	IMPACT=MODIFIER;STRAND=-1;SYMBOL=RP11-6N13.1;SYMBOL_SOURCE=Clone_based_vega_gene;NEAREST=NUDT12;INTRON=2/2
rs12515429	5:103905275	T	ENSG00000251574	ENST00000524336	Transcript	intron_variant,non_coding_transcript_variant	-	-	-	-	-	-	IMPACT=MODIFIER;STRAND=-1;SYMBOL=RP11-6N13.1;SYMBOL_SOURCE=Clone_based_vega_gene;NEAREST=NUDT12;INTRON=2/2
rs17156671	5:103905410	C	ENSG00000251574	ENST00000503650	Transcript	intron_variant,non_coding_transcript_variant	-	-	-	-	-	-	IMPACT=MODIFIER;STRAND=-1;SYMBOL=RP11-6N13.1;SYMBOL_SOURCE=Clone_based_vega_gene;NEAREST=NUDT12;INTRON=2/2
rs17156671	5:103905410	C	ENSG00000251574	ENST00000524336	Transcript	intron_variant,non_coding_transcript_variant	-	-	-	-	-	-	IMPACT=MODIFIER;STRAND=-1;SYMBOL=RP11-6N13.1;SYMBOL_SOURCE=Clone_based_vega_gene;NEAREST=NUDT12;INTRON=2/2
rs2403284	5:103906073	T	ENSG00000251574	ENST00000503650	Transcript	intron_variant,non_coding_transcript_variant	-	-	-	-	-	-	IMPACT=MODIFIER;STRAND=-1;SYMBOL=RP11-6N13.1;SYMBOL_SOURCE=Clone_based_vega_gene;NEAREST=NUDT12;INTRON=2/2
rs2403284	5:103906073	T	ENSG00000251574	ENST00000524336	Transcript	intron_variant,non_coding_transcript_variant	-	-	-	-	-	-	IMPACT=MODIFIER;STRAND=-1;SYMBOL=RP11-6N13.1;SYMBOL_SOURCE=Clone_based_vega_gene;NEAREST=NUDT12;INTRON=2/2
rs7703746	5:103907337	A	ENSG00000251574	ENST00000503650	Transcript	intron_variant,non_coding_transcript_variant	-	-	-	-	-	-	IMPACT=MODIFIER;STRAND=-1;SYMBOL=RP11-6N13.1;SYMBOL_SOURCE=Clone_based_vega_gene;NEAREST=NUDT12;INTRON=2/2
rs7703746	5:103907337	A	ENSG00000251574	ENST00000524336	Transcript	intron_variant,non_coding_transcript_variant	-	-	-	-	-	-	IMPACT=MODIFIER;STRAND=-1;SYMBOL=RP11-6N13.1;SYMBOL_SOURCE=Clone_based_vega_gene;NEAREST=NUDT12;INTRON=2/2
rs1421667	5:103907606	A	ENSG00000251574	ENST00000503650	Transcript	intron_variant,non_coding_transcript_variant	-	-	-	-	-	-	IMPACT=MODIFIER;STRAND=-1;SYMBOL=RP11-6N13.1;SYMBOL_SOURCE=Clone_based_vega_gene;NEAREST=NUDT12;INTRON=2/2
rs1421667	5:103907606	A	ENSG00000251574	ENST00000524336	Transcript	intron_variant,non_coding_transcript_variant	-	-	-	-	-	-	IMPACT=MODIFIER;STRAND=-1;SYMBOL=RP11-6N13.1;SYMBOL_SOURCE=Clone_based_vega_gene;NEAREST=NUDT12;INTRON=2/2
rs2032790	5:103908246	T	ENSG00000251574	ENST00000503650	Transcript	intron_variant,non_coding_transcript_variant	-	-	-	-	-	-	IMPACT=MODIFIER;STRAND=-1;SYMBOL=RP11-6N13.1;SYMBOL_SOURCE=Clone_based_vega_gene;NEAREST=NUDT12;INTRON=2/2
rs2032790	5:103908246	T	ENSG00000251574	ENST00000524336	Transcript	intron_variant,non_coding_transcript_variant	-	-	-	-	-	-	IMPACT=MODIFIER;STRAND=-1;SYMBOL=RP11-6N13.1;SYMBOL_SOURCE=Clone_based_vega_gene;NEAREST=NUDT12;INTRON=2/2
rs1421666	5:103908410	G	ENSG00000251574	ENST00000503650	Transcript	intron_variant,non_coding_transcript_variant	-	-	-	-	-	-	IMPACT=MODIFIER;STRAND=-1;SYMBOL=RP11-6N13.1;SYMBOL_SOURCE=Clone_based_vega_gene;NEAREST=NUDT12;INTRON=2/2
rs1421666	5:103908410	G	ENSG00000251574	ENST00000524336	Transcript	intron_variant,non_coding_transcript_variant	-	-	-	-	-	-	IMPACT=MODIFIER;STRAND=-1;SYMBOL=RP11-6N13.1;SYMBOL_SOURCE=Clone_based_vega_gene;NEAREST=NUDT12;INTRON=2/2
rs4295362	5:103908868	T	ENSG00000251574	ENST00000503650	Transcript	intron_variant,non_coding_transcript_variant	-	-	-	-	-	-	IMPACT=MODIFIER;STRAND=-1;SYMBOL=RP11-6N13.1;SYMBOL_SOURCE=Clone_based_vega_gene;NEAREST=NUDT12;INTRON=2/2
rs4295362	5:103908868	T	ENSG00000251574	ENST00000524336	Transcript	intron_variant,non_coding_transcript_variant	-	-	-	-	-	-	IMPACT=MODIFIER;STRAND=-1;SYMBOL=RP11-6N13.1;SYMBOL_SOURCE=Clone_based_vega_gene;NEAREST=NUDT12;INTRON=2/2
rs959857	5:103909548	T	ENSG00000251574	ENST00000503650	Transcript	intron_variant,non_coding_transcript_variant	-	-	-	-	-	-	IMPACT=MODIFIER;STRAND=-1;SYMBOL=RP11-6N13.1;SYMBOL_SOURCE=Clone_based_vega_gene;NEAREST=NUDT12;INTRON=2/2
rs959857	5:103909548	T	ENSG00000251574	ENST00000524336	Transcript	intron_variant,non_coding_transcript_variant	-	-	-	-	-	-	IMPACT=MODIFIER;STRAND=-1;SYMBOL=RP11-6N13.1;SYMBOL_SOURCE=Clone_based_vega_gene;NEAREST=NUDT12;INTRON=2/2
rs768905	5:103909664	C	ENSG00000251574	ENST00000503650	Transcript	intron_variant,non_coding_transcript_variant	-	-	-	-	-	-	IMPACT=MODIFIER;STRAND=-1;SYMBOL=RP11-6N13.1;SYMBOL_SOURCE=Clone_based_vega_gene;NEAREST=NUDT12;INTRON=2/2
rs768905	5:103909664	C	ENSG00000251574	ENST00000524336	Transcript	intron_variant,non_coding_transcript_variant	-	-	-	-	-	-	IMPACT=MODIFIER;STRAND=-1;SYMBOL=RP11-6N13.1;SYMBOL_SOURCE=Clone_based_vega_gene;NEAREST=NUDT12;INTRON=2/2
rs254011	5:103920770	A	ENSG00000251574	ENST00000503650	Transcript	intron_variant,non_coding_transcript_variant	-	-	-	-	-	-	IMPACT=MODIFIER;STRAND=-1;SYMBOL=RP11-6N13.1;SYMBOL_SOURCE=Clone_based_vega_gene;NEAREST=NUDT12;INTRON=2/2
rs254011	5:103920770	A	ENSG00000251574	ENST00000524336	Transcript	intron_variant,non_coding_transcript_variant	-	-	-	-	-	-	IMPACT=MODIFIER;STRAND=-1;SYMBOL=RP11-6N13.1;SYMBOL_SOURCE=Clone_based_vega_gene;NEAREST=NUDT12;INTRON=2/2
rs254013	5:103926044	T	ENSG00000251574	ENST00000503650	Transcript	intron_variant,non_coding_transcript_variant	-	-	-	-	-	-	IMPACT=MODIFIER;STRAND=-1;SYMBOL=RP11-6N13.1;SYMBOL_SOURCE=Clone_based_vega_gene;NEAREST=NUDT12;INTRON=2/2
rs254013	5:103926044	T	ENSG00000251574	ENST00000524336	Transcript	intron_variant,non_coding_transcript_variant	-	-	-	-	-	-	IMPACT=MODIFIER;STRAND=-1;SYMBOL=RP11-6N13.1;SYMBOL_SOURCE=Clone_based_vega_gene;NEAREST=NUDT12;INTRON=2/2
rs445578	5:103926442	A	ENSG00000251574	ENST00000503650	Transcript	intron_variant,non_coding_transcript_variant	-	-	-	-	-	-	IMPACT=MODIFIER;STRAND=-1;SYMBOL=RP11-6N13.1;SYMBOL_SOURCE=Clone_based_vega_gene;NEAREST=NUDT12;INTRON=2/2
rs445578	5:103926442	A	ENSG00000251574	ENST00000524336	Transcript	intron_variant,non_coding_transcript_variant	-	-	-	-	-	-	IMPACT=MODIFIER;STRAND=-1;SYMBOL=RP11-6N13.1;SYMBOL_SOURCE=Clone_based_vega_gene;NEAREST=NUDT12;INTRON=2/2
rs2447838	5:103927579	T	ENSG00000251574	ENST00000503650	Transcript	intron_variant,non_coding_transcript_variant	-	-	-	-	-	-	IMPACT=MODIFIER;STRAND=-1;SYMBOL=RP11-6N13.1;SYMBOL_SOURCE=Clone_based_vega_gene;NEAREST=NUDT12;INTRON=2/2
rs2447838	5:103927579	T	ENSG00000251574	ENST00000524336	Transcript	intron_variant,non_coding_transcript_variant	-	-	-	-	-	-	IMPACT=MODIFIER;STRAND=-1;SYMBOL=RP11-6N13.1;SYMBOL_SOURCE=Clone_based_vega_gene;NEAREST=NUDT12;INTRON=2/2
rs2431112	5:103931707	A	ENSG00000251574	ENST00000503650	Transcript	intron_variant,non_coding_transcript_variant	-	-	-	-	-	-	IMPACT=MODIFIER;STRAND=-1;SYMBOL=RP11-6N13.1;SYMBOL_SOURCE=Clone_based_vega_gene;NEAREST=NUDT12;INTRON=2/2
rs2431112	5:103931707	A	ENSG00000251574	ENST00000524336	Transcript	intron_variant,non_coding_transcript_variant	-	-	-	-	-	-	IMPACT=MODIFIER;STRAND=-1;SYMBOL=RP11-6N13.1;SYMBOL_SOURCE=Clone_based_vega_gene;NEAREST=NUDT12;INTRON=2/2
rs2447832	5:103933473	T	ENSG00000251574	ENST00000503650	Transcript	intron_variant,non_coding_transcript_variant	-	-	-	-	-	-	IMPACT=MODIFIER;STRAND=-1;SYMBOL=RP11-6N13.1;SYMBOL_SOURCE=Clone_based_vega_gene;NEAREST=NUDT12;INTRON=2/2
rs2447832	5:103933473	T	ENSG00000251574	ENST00000524336	Transcript	intron_variant,non_coding_transcript_variant	-	-	-	-	-	-	IMPACT=MODIFIER;STRAND=-1;SYMBOL=RP11-6N13.1;SYMBOL_SOURCE=Clone_based_vega_gene;NEAREST=NUDT12;INTRON=2/2
rs254035	5:103936343	A	ENSG00000251574	ENST00000503650	Transcript	intron_variant,non_coding_transcript_variant	-	-	-	-	-	-	IMPACT=MODIFIER;STRAND=-1;SYMBOL=RP11-6N13.1;SYMBOL_SOURCE=Clone_based_vega_gene;NEAREST=NUDT12;INTRON=2/2
rs254035	5:103936343	A	ENSG00000251574	ENST00000524336	Transcript	intron_variant,non_coding_transcript_variant	-	-	-	-	-	-	IMPACT=MODIFIER;STRAND=-1;SYMBOL=RP11-6N13.1;SYMBOL_SOURCE=Clone_based_vega_gene;NEAREST=NUDT12;INTRON=2/2
rs12187898	5:103939674	T	ENSG00000251574	ENST00000503650	Transcript	intron_variant,non_coding_transcript_variant	-	-	-	-	-	-	IMPACT=MODIFIER;STRAND=-1;SYMBOL=RP11-6N13.1;SYMBOL_SOURCE=Clone_based_vega_gene;NEAREST=NUDT12;INTRON=2/2
rs12187898	5:103939674	T	ENSG00000251574	ENST00000524336	Transcript	intron_variant,non_coding_transcript_variant	-	-	-	-	-	-	IMPACT=MODIFIER;STRAND=-1;SYMBOL=RP11-6N13.1;SYMBOL_SOURCE=Clone_based_vega_gene;NEAREST=NUDT12;INTRON=2/2
rs12187903	5:103939770	T	ENSG00000251574	ENST00000503650	Transcript	intron_variant,non_coding_transcript_variant	-	-	-	-	-	-	IMPACT=MODIFIER;STRAND=-1;SYMBOL=RP11-6N13.1;SYMBOL_SOURCE=Clone_based_vega_gene;NEAREST=NUDT12;INTRON=2/2
rs12187903	5:103939770	T	ENSG00000251574	ENST00000524336	Transcript	intron_variant,non_coding_transcript_variant	-	-	-	-	-	-	IMPACT=MODIFIER;STRAND=-1;SYMBOL=RP11-6N13.1;SYMBOL_SOURCE=Clone_based_vega_gene;NEAREST=NUDT12;INTRON=2/2
rs1363101	5:103941070	G	ENSG00000251574	ENST00000503650	Transcript	intron_variant,non_coding_transcript_variant	-	-	-	-	-	-	IMPACT=MODIFIER;STRAND=-1;SYMBOL=RP11-6N13.1;SYMBOL_SOURCE=Clone_based_vega_gene;NEAREST=NUDT12;INTRON=2/2
rs1363101	5:103941070	G	ENSG00000251574	ENST00000524336	Transcript	intron_variant,non_coding_transcript_variant	-	-	-	-	-	-	IMPACT=MODIFIER;STRAND=-1;SYMBOL=RP11-6N13.1;SYMBOL_SOURCE=Clone_based_vega_gene;NEAREST=NUDT12;INTRON=2/2
rs2018142	5:103941793	A	ENSG00000251574	ENST00000503650	Transcript	intron_variant,non_coding_transcript_variant	-	-	-	-	-	-	IMPACT=MODIFIER;STRAND=-1;SYMBOL=RP11-6N13.1;SYMBOL_SOURCE=Clone_based_vega_gene;NEAREST=NUDT12;INTRON=2/2
rs2018142	5:103941793	A	ENSG00000251574	ENST00000524336	Transcript	intron_variant,non_coding_transcript_variant	-	-	-	-	-	-	IMPACT=MODIFIER;STRAND=-1;SYMBOL=RP11-6N13.1;SYMBOL_SOURCE=Clone_based_vega_gene;NEAREST=NUDT12;INTRON=2/2
rs254025	5:103943938	G	ENSG00000251574	ENST00000503650	Transcript	intron_variant,non_coding_transcript_variant	-	-	-	-	-	-	IMPACT=MODIFIER;STRAND=-1;SYMBOL=RP11-6N13.1;SYMBOL_SOURCE=Clone_based_vega_gene;NEAREST=NUDT12;INTRON=2/2
rs254025	5:103943938	G	ENSG00000251574	ENST00000524336	Transcript	intron_variant,non_coding_transcript_variant	-	-	-	-	-	-	IMPACT=MODIFIER;STRAND=-1;SYMBOL=RP11-6N13.1;SYMBOL_SOURCE=Clone_based_vega_gene;NEAREST=NUDT12;INTRON=2/2
rs254024	5:103944020	T	ENSG00000251574	ENST00000503650	Transcript	intron_variant,non_coding_transcript_variant	-	-	-	-	-	-	IMPACT=MODIFIER;STRAND=-1;SYMBOL=RP11-6N13.1;SYMBOL_SOURCE=Clone_based_vega_gene;NEAREST=NUDT12;INTRON=2/2
rs254024	5:103944020	T	ENSG00000251574	ENST00000524336	Transcript	intron_variant,non_coding_transcript_variant	-	-	-	-	-	-	IMPACT=MODIFIER;STRAND=-1;SYMBOL=RP11-6N13.1;SYMBOL_SOURCE=Clone_based_vega_gene;NEAREST=NUDT12;INTRON=2/2
rs2431109	5:103945126	G	ENSG00000251574	ENST00000503650	Transcript	intron_variant,non_coding_transcript_variant	-	-	-	-	-	-	IMPACT=MODIFIER;STRAND=-1;SYMBOL=RP11-6N13.1;SYMBOL_SOURCE=Clone_based_vega_gene;NEAREST=NUDT12;INTRON=2/2
rs2431109	5:103945126	G	ENSG00000251574	ENST00000524336	Transcript	intron_variant,non_coding_transcript_variant	-	-	-	-	-	-	IMPACT=MODIFIER;STRAND=-1;SYMBOL=RP11-6N13.1;SYMBOL_SOURCE=Clone_based_vega_gene;NEAREST=NUDT12;INTRON=2/2
rs2161097	5:103945178	T	ENSG00000251574	ENST00000503650	Transcript	intron_variant,non_coding_transcript_variant	-	-	-	-	-	-	IMPACT=MODIFIER;STRAND=-1;SYMBOL=RP11-6N13.1;SYMBOL_SOURCE=Clone_based_vega_gene;NEAREST=NUDT12;INTRON=2/2
rs2161097	5:103945178	T	ENSG00000251574	ENST00000524336	Transcript	intron_variant,non_coding_transcript_variant	-	-	-	-	-	-	IMPACT=MODIFIER;STRAND=-1;SYMBOL=RP11-6N13.1;SYMBOL_SOURCE=Clone_based_vega_gene;NEAREST=NUDT12;INTRON=2/2
rs1363100	5:103946206	T	ENSG00000251574	ENST00000503650	Transcript	intron_variant,non_coding_transcript_variant	-	-	-	-	-	-	IMPACT=MODIFIER;STRAND=-1;SYMBOL=RP11-6N13.1;SYMBOL_SOURCE=Clone_based_vega_gene;NEAREST=NUDT12;INTRON=2/2
rs1363100	5:103946206	T	ENSG00000251574	ENST00000524336	Transcript	intron_variant,non_coding_transcript_variant	-	-	-	-	-	-	IMPACT=MODIFIER;STRAND=-1;SYMBOL=RP11-6N13.1;SYMBOL_SOURCE=Clone_based_vega_gene;NEAREST=NUDT12;INTRON=2/2
rs2112163	5:103946482	T	ENSG00000251574	ENST00000503650	Transcript	intron_variant,non_coding_transcript_variant	-	-	-	-	-	-	IMPACT=MODIFIER;STRAND=-1;SYMBOL=RP11-6N13.1;SYMBOL_SOURCE=Clone_based_vega_gene;NEAREST=NUDT12;INTRON=2/2
rs2112163	5:103946482	T	ENSG00000251574	ENST00000524336	Transcript	intron_variant,non_coding_transcript_variant	-	-	-	-	-	-	IMPACT=MODIFIER;STRAND=-1;SYMBOL=RP11-6N13.1;SYMBOL_SOURCE=Clone_based_vega_gene;NEAREST=NUDT12;INTRON=2/2
rs2447828	5:103947205	T	ENSG00000251574	ENST00000503650	Transcript	intron_variant,non_coding_transcript_variant	-	-	-	-	-	-	IMPACT=MODIFIER;STRAND=-1;SYMBOL=RP11-6N13.1;SYMBOL_SOURCE=Clone_based_vega_gene;NEAREST=NUDT12;INTRON=2/2
rs2447828	5:103947205	T	ENSG00000251574	ENST00000524336	Transcript	intron_variant,non_coding_transcript_variant	-	-	-	-	-	-	IMPACT=MODIFIER;STRAND=-1;SYMBOL=RP11-6N13.1;SYMBOL_SOURCE=Clone_based_vega_gene;NEAREST=NUDT12;INTRON=2/2
rs2447827	5:103948045	T	ENSG00000251574	ENST00000503650	Transcript	intron_variant,non_coding_transcript_variant	-	-	-	-	-	-	IMPACT=MODIFIER;STRAND=-1;SYMBOL=RP11-6N13.1;SYMBOL_SOURCE=Clone_based_vega_gene;NEAREST=NUDT12;INTRON=2/2
rs2447827	5:103948045	T	ENSG00000251574	ENST00000524336	Transcript	intron_variant,non_coding_transcript_variant	-	-	-	-	-	-	IMPACT=MODIFIER;STRAND=-1;SYMBOL=RP11-6N13.1;SYMBOL_SOURCE=Clone_based_vega_gene;NEAREST=NUDT12;INTRON=2/2
rs254020	5:103950251	T	ENSG00000251574	ENST00000503650	Transcript	intron_variant,non_coding_transcript_variant	-	-	-	-	-	-	IMPACT=MODIFIER;STRAND=-1;SYMBOL=RP11-6N13.1;SYMBOL_SOURCE=Clone_based_vega_gene;NEAREST=NUDT12;INTRON=2/2
rs254020	5:103950251	T	ENSG00000251574	ENST00000524336	Transcript	intron_variant,non_coding_transcript_variant	-	-	-	-	-	-	IMPACT=MODIFIER;STRAND=-1;SYMBOL=RP11-6N13.1;SYMBOL_SOURCE=Clone_based_vega_gene;NEAREST=NUDT12;INTRON=2/2
rs254023	5:103955361	C	ENSG00000251574	ENST00000503650	Transcript	intron_variant,non_coding_transcript_variant	-	-	-	-	-	-	IMPACT=MODIFIER;STRAND=-1;SYMBOL=RP11-6N13.1;SYMBOL_SOURCE=Clone_based_vega_gene;NEAREST=NUDT12;INTRON=2/2
rs254023	5:103955361	C	ENSG00000251574	ENST00000524336	Transcript	intron_variant,non_coding_transcript_variant	-	-	-	-	-	-	IMPACT=MODIFIER;STRAND=-1;SYMBOL=RP11-6N13.1;SYMBOL_SOURCE=Clone_based_vega_gene;NEAREST=NUDT12;INTRON=2/2
rs254045	5:103959345	G	ENSG00000251574	ENST00000503650	Transcript	intron_variant,non_coding_transcript_variant	-	-	-	-	-	-	IMPACT=MODIFIER;STRAND=-1;SYMBOL=RP11-6N13.1;SYMBOL_SOURCE=Clone_based_vega_gene;NEAREST=NUDT12;INTRON=2/2
rs254045	5:103959345	G	ENSG00000251574	ENST00000524336	Transcript	intron_variant,non_coding_transcript_variant	-	-	-	-	-	-	IMPACT=MODIFIER;STRAND=-1;SYMBOL=RP11-6N13.1;SYMBOL_SOURCE=Clone_based_vega_gene;NEAREST=NUDT12;INTRON=2/2
rs185260	5:103965223	C	ENSG00000251574	ENST00000503650	Transcript	intron_variant,non_coding_transcript_variant	-	-	-	-	-	-	IMPACT=MODIFIER;STRAND=-1;SYMBOL=RP11-6N13.1;SYMBOL_SOURCE=Clone_based_vega_gene;NEAREST=NUDT12;INTRON=2/2
rs185260	5:103965223	C	ENSG00000251574	ENST00000505824	Transcript	downstream_gene_variant	-	-	-	-	-	-	IMPACT=MODIFIER;DISTANCE=1014;STRAND=-1;SYMBOL=RP11-6N13.1;SYMBOL_SOURCE=Clone_based_vega_gene;NEAREST=NUDT12
rs185260	5:103965223	C	ENSG00000251574	ENST00000506976	Transcript	downstream_gene_variant	-	-	-	-	-	-	IMPACT=MODIFIER;DISTANCE=865;STRAND=-1;SYMBOL=RP11-6N13.1;SYMBOL_SOURCE=Clone_based_vega_gene;NEAREST=NUDT12
rs185260	5:103965223	C	ENSG00000251574	ENST00000524336	Transcript	intron_variant,non_coding_transcript_variant	-	-	-	-	-	-	IMPACT=MODIFIER;STRAND=-1;SYMBOL=RP11-6N13.1;SYMBOL_SOURCE=Clone_based_vega_gene;NEAREST=NUDT12;INTRON=2/2
rs33817	5:103978326	A	ENSG00000251574	ENST00000503650	Transcript	intron_variant,non_coding_transcript_variant	-	-	-	-	-	-	IMPACT=MODIFIER;STRAND=-1;SYMBOL=RP11-6N13.1;SYMBOL_SOURCE=Clone_based_vega_gene;NEAREST=NUDT12;INTRON=2/2
rs33817	5:103978326	A	ENSG00000251574	ENST00000505824	Transcript	intron_variant,non_coding_transcript_variant	-	-	-	-	-	-	IMPACT=MODIFIER;STRAND=-1;SYMBOL=RP11-6N13.1;SYMBOL_SOURCE=Clone_based_vega_gene;NEAREST=NUDT12;INTRON=2/2
rs33817	5:103978326	A	ENSG00000251574	ENST00000506976	Transcript	intron_variant,non_coding_transcript_variant	-	-	-	-	-	-	IMPACT=MODIFIER;STRAND=-1;SYMBOL=RP11-6N13.1;SYMBOL_SOURCE=Clone_based_vega_gene;NEAREST=NUDT12;INTRON=2/2
rs33817	5:103978326	A	ENSG00000251574	ENST00000524336	Transcript	intron_variant,non_coding_transcript_variant	-	-	-	-	-	-	IMPACT=MODIFIER;STRAND=-1;SYMBOL=RP11-6N13.1;SYMBOL_SOURCE=Clone_based_vega_gene;NEAREST=NUDT12;INTRON=2/2
rs416223	5:103991476	A	ENSG00000251574	ENST00000503650	Transcript	intron_variant,non_coding_transcript_variant	-	-	-	-	-	-	IMPACT=MODIFIER;STRAND=-1;SYMBOL=RP11-6N13.1;SYMBOL_SOURCE=Clone_based_vega_gene;NEAREST=NUDT12;INTRON=2/2
rs416223	5:103991476	A	ENSG00000251574	ENST00000505824	Transcript	intron_variant,non_coding_transcript_variant	-	-	-	-	-	-	IMPACT=MODIFIER;STRAND=-1;SYMBOL=RP11-6N13.1;SYMBOL_SOURCE=Clone_based_vega_gene;NEAREST=NUDT12;INTRON=2/2
rs416223	5:103991476	A	ENSG00000251574	ENST00000506976	Transcript	intron_variant,non_coding_transcript_variant	-	-	-	-	-	-	IMPACT=MODIFIER;STRAND=-1;SYMBOL=RP11-6N13.1;SYMBOL_SOURCE=Clone_based_vega_gene;NEAREST=NUDT12;INTRON=2/2
rs416223	5:103991476	A	ENSG00000251574	ENST00000524336	Transcript	intron_variant,non_coding_transcript_variant	-	-	-	-	-	-	IMPACT=MODIFIER;STRAND=-1;SYMBOL=RP11-6N13.1;SYMBOL_SOURCE=Clone_based_vega_gene;NEAREST=NUDT12;INTRON=2/2
rs325481	5:104000752	A	ENSG00000251574	ENST00000503650	Transcript	intron_variant,non_coding_transcript_variant	-	-	-	-	-	-	IMPACT=MODIFIER;STRAND=-1;SYMBOL=RP11-6N13.1;SYMBOL_SOURCE=Clone_based_vega_gene;NEAREST=NUDT12;INTRON=2/2
rs325481	5:104000752	A	ENSG00000251574	ENST00000505824	Transcript	intron_variant,non_coding_transcript_variant	-	-	-	-	-	-	IMPACT=MODIFIER;STRAND=-1;SYMBOL=RP11-6N13.1;SYMBOL_SOURCE=Clone_based_vega_gene;NEAREST=NUDT12;INTRON=2/2
rs325481	5:104000752	A	ENSG00000251574	ENST00000506976	Transcript	intron_variant,non_coding_transcript_variant	-	-	-	-	-	-	IMPACT=MODIFIER;STRAND=-1;SYMBOL=RP11-6N13.1;SYMBOL_SOURCE=Clone_based_vega_gene;NEAREST=NUDT12;INTRON=2/2
rs325481	5:104000752	A	ENSG00000251574	ENST00000524336	Transcript	intron_variant,non_coding_transcript_variant	-	-	-	-	-	-	IMPACT=MODIFIER;STRAND=-1;SYMBOL=RP11-6N13.1;SYMBOL_SOURCE=Clone_based_vega_gene;NEAREST=NUDT12;INTRON=2/2
rs325500	5:104006667	G	ENSG00000251574	ENST00000503650	Transcript	intron_variant,non_coding_transcript_variant	-	-	-	-	-	-	IMPACT=MODIFIER;STRAND=-1;SYMBOL=RP11-6N13.1;SYMBOL_SOURCE=Clone_based_vega_gene;NEAREST=NUDT12;INTRON=2/2
rs325500	5:104006667	G	ENSG00000251574	ENST00000505824	Transcript	intron_variant,non_coding_transcript_variant	-	-	-	-	-	-	IMPACT=MODIFIER;STRAND=-1;SYMBOL=RP11-6N13.1;SYMBOL_SOURCE=Clone_based_vega_gene;NEAREST=NUDT12;INTRON=2/2
rs325500	5:104006667	G	ENSG00000251574	ENST00000506976	Transcript	intron_variant,non_coding_transcript_variant	-	-	-	-	-	-	IMPACT=MODIFIER;STRAND=-1;SYMBOL=RP11-6N13.1;SYMBOL_SOURCE=Clone_based_vega_gene;NEAREST=NUDT12;INTRON=2/2
rs325500	5:104006667	G	ENSG00000251574	ENST00000524336	Transcript	intron_variant,non_coding_transcript_variant	-	-	-	-	-	-	IMPACT=MODIFIER;STRAND=-1;SYMBOL=RP11-6N13.1;SYMBOL_SOURCE=Clone_based_vega_gene;NEAREST=NUDT12;INTRON=2/2
rs325501	5:104007433	C	ENSG00000251574	ENST00000503650	Transcript	intron_variant,non_coding_transcript_variant	-	-	-	-	-	-	IMPACT=MODIFIER;STRAND=-1;SYMBOL=RP11-6N13.1;SYMBOL_SOURCE=Clone_based_vega_gene;NEAREST=NUDT12;INTRON=2/2
rs325501	5:104007433	C	ENSG00000251574	ENST00000505824	Transcript	intron_variant,non_coding_transcript_variant	-	-	-	-	-	-	IMPACT=MODIFIER;STRAND=-1;SYMBOL=RP11-6N13.1;SYMBOL_SOURCE=Clone_based_vega_gene;NEAREST=NUDT12;INTRON=2/2
rs325501	5:104007433	C	ENSG00000251574	ENST00000506976	Transcript	intron_variant,non_coding_transcript_variant	-	-	-	-	-	-	IMPACT=MODIFIER;STRAND=-1;SYMBOL=RP11-6N13.1;SYMBOL_SOURCE=Clone_based_vega_gene;NEAREST=NUDT12;INTRON=2/2
rs325501	5:104007433	C	ENSG00000251574	ENST00000524336	Transcript	intron_variant,non_coding_transcript_variant	-	-	-	-	-	-	IMPACT=MODIFIER;STRAND=-1;SYMBOL=RP11-6N13.1;SYMBOL_SOURCE=Clone_based_vega_gene;NEAREST=NUDT12;INTRON=2/2
rs325502	5:104008133	A	ENSG00000251574	ENST00000503650	Transcript	intron_variant,non_coding_transcript_variant	-	-	-	-	-	-	IMPACT=MODIFIER;STRAND=-1;SYMBOL=RP11-6N13.1;SYMBOL_SOURCE=Clone_based_vega_gene;NEAREST=NUDT12;INTRON=2/2
rs325502	5:104008133	A	ENSG00000251574	ENST00000505824	Transcript	intron_variant,non_coding_transcript_variant	-	-	-	-	-	-	IMPACT=MODIFIER;STRAND=-1;SYMBOL=RP11-6N13.1;SYMBOL_SOURCE=Clone_based_vega_gene;NEAREST=NUDT12;INTRON=2/2
rs325502	5:104008133	A	ENSG00000251574	ENST00000506976	Transcript	intron_variant,non_coding_transcript_variant	-	-	-	-	-	-	IMPACT=MODIFIER;STRAND=-1;SYMBOL=RP11-6N13.1;SYMBOL_SOURCE=Clone_based_vega_gene;NEAREST=NUDT12;INTRON=2/2
rs325502	5:104008133	A	ENSG00000251574	ENST00000524336	Transcript	intron_variant,non_coding_transcript_variant	-	-	-	-	-	-	IMPACT=MODIFIER;STRAND=-1;SYMBOL=RP11-6N13.1;SYMBOL_SOURCE=Clone_based_vega_gene;NEAREST=NUDT12;INTRON=2/2
rs21126	5:104013782	A	ENSG00000251574	ENST00000503650	Transcript	intron_variant,non_coding_transcript_variant	-	-	-	-	-	-	IMPACT=MODIFIER;STRAND=-1;SYMBOL=RP11-6N13.1;SYMBOL_SOURCE=Clone_based_vega_gene;NEAREST=NUDT12;INTRON=2/2
rs21126	5:104013782	A	ENSG00000251574	ENST00000505824	Transcript	intron_variant,non_coding_transcript_variant	-	-	-	-	-	-	IMPACT=MODIFIER;STRAND=-1;SYMBOL=RP11-6N13.1;SYMBOL_SOURCE=Clone_based_vega_gene;NEAREST=NUDT12;INTRON=2/2
rs21126	5:104013782	A	ENSG00000251574	ENST00000506976	Transcript	intron_variant,non_coding_transcript_variant	-	-	-	-	-	-	IMPACT=MODIFIER;STRAND=-1;SYMBOL=RP11-6N13.1;SYMBOL_SOURCE=Clone_based_vega_gene;NEAREST=NUDT12;INTRON=2/2
rs21126	5:104013782	A	ENSG00000251574	ENST00000524336	Transcript	intron_variant,non_coding_transcript_variant	-	-	-	-	-	-	IMPACT=MODIFIER;STRAND=-1;SYMBOL=RP11-6N13.1;SYMBOL_SOURCE=Clone_based_vega_gene;NEAREST=NUDT12;INTRON=2/2
rs396755	5:104022239	G	ENSG00000251574	ENST00000503650	Transcript	intron_variant,non_coding_transcript_variant	-	-	-	-	-	-	IMPACT=MODIFIER;STRAND=-1;SYMBOL=RP11-6N13.1;SYMBOL_SOURCE=Clone_based_vega_gene;NEAREST=NUDT12;INTRON=2/2
rs396755	5:104022239	G	ENSG00000251574	ENST00000505824	Transcript	intron_variant,non_coding_transcript_variant	-	-	-	-	-	-	IMPACT=MODIFIER;STRAND=-1;SYMBOL=RP11-6N13.1;SYMBOL_SOURCE=Clone_based_vega_gene;NEAREST=NUDT12;INTRON=2/2
rs396755	5:104022239	G	ENSG00000251574	ENST00000506976	Transcript	intron_variant,non_coding_transcript_variant	-	-	-	-	-	-	IMPACT=MODIFIER;STRAND=-1;SYMBOL=RP11-6N13.1;SYMBOL_SOURCE=Clone_based_vega_gene;NEAREST=NUDT12;INTRON=2/2
rs396755	5:104022239	G	ENSG00000251574	ENST00000524336	Transcript	intron_variant,non_coding_transcript_variant	-	-	-	-	-	-	IMPACT=MODIFIER;STRAND=-1;SYMBOL=RP11-6N13.1;SYMBOL_SOURCE=Clone_based_vega_gene;NEAREST=NUDT12;INTRON=2/2
rs1280725	6:54493586	A	ENSG00000220773	ENST00000406712	Transcript	downstream_gene_variant	-	-	-	-	-	-	IMPACT=MODIFIER;DISTANCE=3300;STRAND=1;SYMBOL=RP3-334F4.1;SYMBOL_SOURCE=Clone_based_vega_gene;NEAREST=FAM83B
rs1280710	6:54499600	C	-	-	-	intergenic_variant	-	-	-	-	-	-	IMPACT=MODIFIER;NEAREST=FAM83B
rs534685	6:54503147	T	-	-	-	intergenic_variant	-	-	-	-	-	-	IMPACT=MODIFIER;NEAREST=FAM83B
rs1298465	6:54503884	T	-	-	-	intergenic_variant	-	-	-	-	-	-	IMPACT=MODIFIER;NEAREST=FAM83B
rs694600	6:54504578	T	-	-	-	intergenic_variant	-	-	-	-	-	-	IMPACT=MODIFIER;NEAREST=FAM83B
rs590594	6:54505127	C	-	-	-	intergenic_variant	-	-	-	-	-	-	IMPACT=MODIFIER;NEAREST=FAM83B
rs511441	6:54505740	A	-	-	-	intergenic_variant	-	-	-	-	-	-	IMPACT=MODIFIER;NEAREST=FAM83B
rs541689	6:54506752	G	-	-	-	intergenic_variant	-	-	-	-	-	-	IMPACT=MODIFIER;NEAREST=FAM83B
rs7753964	6:54509720	G	-	-	-	intergenic_variant	-	-	-	-	-	-	IMPACT=MODIFIER;NEAREST=FAM83B
rs16885654	6:54509899	A	-	-	-	intergenic_variant	-	-	-	-	-	-	IMPACT=MODIFIER;NEAREST=FAM83B
rs12527767	6:54513067	A	-	-	-	intergenic_variant	-	-	-	-	-	-	IMPACT=MODIFIER;NEAREST=FAM83B
rs12664014	6:54514580	A	-	-	-	intergenic_variant	-	-	-	-	-	-	IMPACT=MODIFIER;NEAREST=FAM83B
rs78104758	6:54524010	C	-	-	-	intergenic_variant	-	-	-	-	-	-	IMPACT=MODIFIER;NEAREST=FAM83B
rs872135	6:54525093	C	-	-	-	intergenic_variant	-	-	-	-	-	-	IMPACT=MODIFIER;NEAREST=FAM83B
rs1848188	6:54525653	G	-	-	-	intergenic_variant	-	-	-	-	-	-	IMPACT=MODIFIER;NEAREST=FAM83B
rs12660952	6:54526440	T	-	-	-	intergenic_variant	-	-	-	-	-	-	IMPACT=MODIFIER;NEAREST=FAM83B
rs10807476	6:54527066	A	-	-	-	intergenic_variant	-	-	-	-	-	-	IMPACT=MODIFIER;NEAREST=FAM83B
rs12528652	6:54527769	G	-	-	-	intergenic_variant	-	-	-	-	-	-	IMPACT=MODIFIER;NEAREST=FAM83B
rs16885682	6:54528450	A	-	-	-	intergenic_variant	-	-	-	-	-	-	IMPACT=MODIFIER;NEAREST=FAM83B
rs931889	6:54528507	T	-	-	-	intergenic_variant	-	-	-	-	-	-	IMPACT=MODIFIER;NEAREST=FAM83B
rs4715466	6:54529256	A	-	-	-	intergenic_variant	-	-	-	-	-	-	IMPACT=MODIFIER;NEAREST=FAM83B
rs950077	6:54531708	G	-	-	-	intergenic_variant	-	-	-	-	-	-	IMPACT=MODIFIER;NEAREST=FAM83B
rs953896	6:54531949	A	-	-	-	intergenic_variant	-	-	-	-	-	-	IMPACT=MODIFIER;NEAREST=FAM83B
rs11966577	6:54531993	C	-	-	-	intergenic_variant	-	-	-	-	-	-	IMPACT=MODIFIER;NEAREST=FAM83B
rs34659714	6:54532749	T	-	-	-	intergenic_variant	-	-	-	-	-	-	IMPACT=MODIFIER;NEAREST=FAM83B
rs10948839	6:54533327	G	-	-	-	intergenic_variant	-	-	-	-	-	-	IMPACT=MODIFIER;NEAREST=FAM83B
rs12526949	6:54536190	T	-	-	-	intergenic_variant	-	-	-	-	-	-	IMPACT=MODIFIER;NEAREST=FAM83B
rs12528779	6:54536407	A	-	-	-	intergenic_variant	-	-	-	-	-	-	IMPACT=MODIFIER;NEAREST=FAM83B
rs10484989	6:54536877	C	-	-	-	intergenic_variant	-	-	-	-	-	-	IMPACT=MODIFIER;NEAREST=FAM83B
rs6903481	6:54537058	T	-	-	-	intergenic_variant	-	-	-	-	-	-	IMPACT=MODIFIER;NEAREST=FAM83B
rs6903770	6:54537124	T	-	-	-	intergenic_variant	-	-	-	-	-	-	IMPACT=MODIFIER;NEAREST=FAM83B
rs60999808	6:54544029	A	-	-	-	intergenic_variant	-	-	-	-	-	-	IMPACT=MODIFIER;NEAREST=FAM83B
rs61375854	6:54546301	G	-	-	-	intergenic_variant	-	-	-	-	-	-	IMPACT=MODIFIER;NEAREST=FAM83B
rs73440097	6:54546376	T	-	-	-	intergenic_variant	-	-	-	-	-	-	IMPACT=MODIFIER;NEAREST=FAM83B
rs16885760	6:54546437	T	-	-	-	intergenic_variant	-	-	-	-	-	-	IMPACT=MODIFIER;NEAREST=FAM83B
rs4712065	6:54546780	C	-	-	-	intergenic_variant	-	-	-	-	-	-	IMPACT=MODIFIER;NEAREST=FAM83B
rs4712066	6:54546785	T	-	-	-	intergenic_variant	-	-	-	-	-	-	IMPACT=MODIFIER;NEAREST=FAM83B
rs1395627	6:54547089	A	-	ENSR00000408081	RegulatoryFeature	regulatory_region_variant	-	-	-	-	-	-	IMPACT=MODIFIER;NEAREST=FAM83B;BIOTYPE=TF_binding_site
rs1395627	6:54547089	A	-	-	-	intergenic_variant	-	-	-	-	-	-	IMPACT=MODIFIER;NEAREST=FAM83B
rs7740110	6:54549133	T	-	-	-	intergenic_variant	-	-	-	-	-	-	IMPACT=MODIFIER;NEAREST=FAM83B
rs1948954	6:54562935	C	-	-	-	intergenic_variant	-	-	-	-	-	-	IMPACT=MODIFIER;NEAREST=FAM83B
rs73442093	6:54577109	G	-	-	-	intergenic_variant	-	-	-	-	-	-	IMPACT=MODIFIER;NEAREST=FAM83B
rs2048113	6:54577218	C	-	-	-	intergenic_variant	-	-	-	-	-	-	IMPACT=MODIFIER;NEAREST=FAM83B
rs1983140	6:54577687	G	-	-	-	intergenic_variant	-	-	-	-	-	-	IMPACT=MODIFIER;NEAREST=FAM83B
rs10252701	7:17280513	C	-	-	-	intergenic_variant	-	-	-	-	-	-	IMPACT=MODIFIER;NEAREST=AHR
rs4410790	7:17284577	C	-	-	-	intergenic_variant	-	-	-	-	-	-	IMPACT=MODIFIER;NEAREST=AHR
rs10277582	7:17284989	T	-	-	-	intergenic_variant	-	-	-	-	-	-	IMPACT=MODIFIER;NEAREST=AHR
rs10281571	7:17285867	G	-	-	-	intergenic_variant	-	-	-	-	-	-	IMPACT=MODIFIER;NEAREST=AHR
rs6968554	7:17287106	G	-	-	-	intergenic_variant	-	-	-	-	-	-	IMPACT=MODIFIER;NEAREST=AHR
rs6968865	7:17287269	T	-	-	-	intergenic_variant	-	-	-	-	-	-	IMPACT=MODIFIER;NEAREST=AHR
rs2106727	7:17287998	G	-	-	-	intergenic_variant	-	-	-	-	-	-	IMPACT=MODIFIER;NEAREST=AHR
rs10275488	7:17303778	T	-	-	-	intergenic_variant	-	-	-	-	-	-	IMPACT=MODIFIER;NEAREST=AHR
rs2389763	7:17307847	C	-	-	-	intergenic_variant	-	-	-	-	-	-	IMPACT=MODIFIER;NEAREST=AHR
rs6467447	7:132525147	T	ENSG00000106554	ENST00000262570	Transcript	intron_variant	-	-	-	-	-	-	IMPACT=MODIFIER;STRAND=-1;SYMBOL=CHCHD3;SYMBOL_SOURCE=HGNC;HGNC_ID=21906;NEAREST=AC009365.3;INTRON=5/7
rs6467447	7:132525147	T	ENSG00000106554	ENST00000423635	Transcript	intron_variant,NMD_transcript_variant	-	-	-	-	-	-	IMPACT=MODIFIER;STRAND=-1;SYMBOL=CHCHD3;SYMBOL_SOURCE=HGNC;HGNC_ID=21906;NEAREST=AC009365.3;INTRON=6/10
rs6467447	7:132525147	T	ENSG00000106554	ENST00000448878	Transcript	intron_variant	-	-	-	-	-	-	IMPACT=MODIFIER;STRAND=-1;SYMBOL=CHCHD3;SYMBOL_SOURCE=HGNC;HGNC_ID=21906;NEAREST=AC009365.3;INTRON=5/7
rs6467447	7:132525147	T	ENSG00000227197	ENST00000453078	Transcript	intron_variant,non_coding_transcript_variant	-	-	-	-	-	-	IMPACT=MODIFIER;STRAND=1;SYMBOL=AC009518.8;SYMBOL_SOURCE=Clone_based_vega_gene;NEAREST=AC009365.3;INTRON=1/3
rs6467447	7:132525147	T	ENSG00000106554	ENST00000466644	Transcript	intron_variant,non_coding_transcript_variant	-	-	-	-	-	-	IMPACT=MODIFIER;STRAND=-1;SYMBOL=CHCHD3;SYMBOL_SOURCE=HGNC;HGNC_ID=21906;NEAREST=AC009365.3;INTRON=5/5
rs6467447	7:132525147	T	ENSG00000106554	ENST00000476546	Transcript	intron_variant,non_coding_transcript_variant	-	-	-	-	-	-	IMPACT=MODIFIER;STRAND=-1;SYMBOL=CHCHD3;SYMBOL_SOURCE=HGNC;HGNC_ID=21906;NEAREST=AC009365.3;INTRON=4/6
rs6467447	7:132525147	T	ENSG00000106554	ENST00000496427	Transcript	intron_variant,non_coding_transcript_variant	-	-	-	-	-	-	IMPACT=MODIFIER;STRAND=-1;SYMBOL=CHCHD3;SYMBOL_SOURCE=HGNC;HGNC_ID=21906;NEAREST=AC009365.3;INTRON=4/6
rs7319172	13:67380168	A	ENSG00000184226	ENST00000328454	Transcript	intron_variant	-	-	-	-	-	-	IMPACT=MODIFIER;STRAND=-1;SYMBOL=PCDH9;SYMBOL_SOURCE=HGNC;HGNC_ID=8661;NEAREST=PCDH9;INTRON=1/2
rs7319172	13:67380168	A	ENSG00000184226	ENST00000377865	Transcript	intron_variant	-	-	-	-	-	-	IMPACT=MODIFIER;STRAND=-1;SYMBOL=PCDH9;SYMBOL_SOURCE=HGNC;HGNC_ID=8661;NEAREST=PCDH9;INTRON=2/3
rs7319172	13:67380168	A	ENSG00000184226	ENST00000456367	Transcript	intron_variant	-	-	-	-	-	-	IMPACT=MODIFIER;STRAND=-1;SYMBOL=PCDH9;SYMBOL_SOURCE=HGNC;HGNC_ID=8661;NEAREST=PCDH9;INTRON=2/3
rs7319172	13:67380168	A	ENSG00000184226	ENST00000544246	Transcript	intron_variant	-	-	-	-	-	-	IMPACT=MODIFIER;STRAND=-1;SYMBOL=PCDH9;SYMBOL_SOURCE=HGNC;HGNC_ID=8661;NEAREST=PCDH9;INTRON=3/4
rs35107470	15:74817689	G	-	ENSR00000370169	RegulatoryFeature	regulatory_region_variant	-	-	-	-	-	-	IMPACT=MODIFIER;NEAREST=ARID3B;BIOTYPE=open_chromatin_region
rs35107470	15:74817689	G	-	-	-	intergenic_variant	-	-	-	-	-	-	IMPACT=MODIFIER;NEAREST=ARID3B
rs2470893	15:75019449	T	ENSG00000140465	ENST00000379727	Transcript	upstream_gene_variant	-	-	-	-	-	-	IMPACT=MODIFIER;DISTANCE=1498;STRAND=-1;SYMBOL=CYP1A1;SYMBOL_SOURCE=HGNC;HGNC_ID=2595;NEAREST=CYP1A1
rs2470893	15:75019449	T	ENSG00000140465	ENST00000395048	Transcript	upstream_gene_variant	-	-	-	-	-	-	IMPACT=MODIFIER;DISTANCE=1572;STRAND=-1;SYMBOL=CYP1A1;SYMBOL_SOURCE=HGNC;HGNC_ID=2595;NEAREST=CYP1A1
rs2470893	15:75019449	T	ENSG00000140465	ENST00000395049	Transcript	upstream_gene_variant	-	-	-	-	-	-	IMPACT=MODIFIER;DISTANCE=1614;STRAND=-1;SYMBOL=CYP1A1;SYMBOL_SOURCE=HGNC;HGNC_ID=2595;NEAREST=CYP1A1
rs2470893	15:75019449	T	ENSG00000140465	ENST00000562201	Transcript	upstream_gene_variant	-	-	-	-	-	-	IMPACT=MODIFIER;DISTANCE=1617;STRAND=-1;SYMBOL=CYP1A1;SYMBOL_SOURCE=HGNC;HGNC_ID=2595;NEAREST=CYP1A1
rs2470893	15:75019449	T	ENSG00000140465	ENST00000564596	Transcript	upstream_gene_variant	-	-	-	-	-	-	IMPACT=MODIFIER;DISTANCE=1617;STRAND=-1;SYMBOL=CYP1A1;SYMBOL_SOURCE=HGNC;HGNC_ID=2595;NEAREST=CYP1A1
rs2470893	15:75019449	T	ENSG00000140465	ENST00000566503	Transcript	upstream_gene_variant	-	-	-	-	-	-	IMPACT=MODIFIER;DISTANCE=1617;STRAND=-1;FLAGS=cds_end_NF;SYMBOL=CYP1A1;SYMBOL_SOURCE=HGNC;HGNC_ID=2595;NEAREST=CYP1A1
rs2470893	15:75019449	T	ENSG00000140465	ENST00000567032	Transcript	upstream_gene_variant	-	-	-	-	-	-	IMPACT=MODIFIER;DISTANCE=1738;STRAND=-1;SYMBOL=CYP1A1;SYMBOL_SOURCE=HGNC;HGNC_ID=2595;NEAREST=CYP1A1
rs2470893	15:75019449	T	ENSG00000140465	ENST00000569630	Transcript	upstream_gene_variant	-	-	-	-	-	-	IMPACT=MODIFIER;DISTANCE=1617;STRAND=-1;SYMBOL=CYP1A1;SYMBOL_SOURCE=HGNC;HGNC_ID=2595;NEAREST=CYP1A1
rs2472297	15:75027880	T	-	-	-	intergenic_variant	-	-	-	-	-	-	IMPACT=MODIFIER;NEAREST=CYP1A1
rs76307456	15:75492307	T	ENSG00000167173	ENST00000360639	Transcript	intron_variant	-	-	-	-	-	-	IMPACT=MODIFIER;STRAND=1;SYMBOL=C15orf39;SYMBOL_SOURCE=HGNC;HGNC_ID=24497;NEAREST=C15orf39;INTRON=1/2
rs76307456	15:75492307	T	ENSG00000167173	ENST00000394987	Transcript	upstream_gene_variant	-	-	-	-	-	-	IMPACT=MODIFIER;DISTANCE=1911;STRAND=1;SYMBOL=C15orf39;SYMBOL_SOURCE=HGNC;HGNC_ID=24497;NEAREST=C15orf39
rs76307456	15:75492307	T	ENSG00000167173	ENST00000562637	Transcript	intron_variant	-	-	-	-	-	-	IMPACT=MODIFIER;STRAND=1;FLAGS=cds_end_NF;SYMBOL=C15orf39;SYMBOL_SOURCE=HGNC;HGNC_ID=24497;NEAREST=C15orf39;INTRON=1/2
rs76307456	15:75492307	T	ENSG00000167173	ENST00000563905	Transcript	intron_variant	-	-	-	-	-	-	IMPACT=MODIFIER;STRAND=1;FLAGS=cds_end_NF;SYMBOL=C15orf39;SYMBOL_SOURCE=HGNC;HGNC_ID=24497;NEAREST=C15orf39;INTRON=2/3
rs76307456	15:75492307	T	ENSG00000167173	ENST00000564848	Transcript	upstream_gene_variant	-	-	-	-	-	-	IMPACT=MODIFIER;DISTANCE=2239;STRAND=1;FLAGS=cds_end_NF;SYMBOL=C15orf39;SYMBOL_SOURCE=HGNC;HGNC_ID=24497;NEAREST=C15orf39
rs1873379	15:75498744	C	ENSG00000167173	ENST00000360639	Transcript	missense_variant	675	355	119	A/P	Gct/Cct	-	IMPACT=MODERATE;STRAND=1;SYMBOL=C15orf39;SYMBOL_SOURCE=HGNC;HGNC_ID=24497;NEAREST=C15orf39;SIFT=tolerated(0.06);PolyPhen=benign(0);EXON=2/3
rs1873379	15:75498744	C	ENSG00000167173	ENST00000394987	Transcript	missense_variant	588	355	119	A/P	Gct/Cct	-	IMPACT=MODERATE;STRAND=1;SYMBOL=C15orf39;SYMBOL_SOURCE=HGNC;HGNC_ID=24497;NEAREST=C15orf39;SIFT=tolerated(0.06);PolyPhen=benign(0);EXON=2/3
rs1873379	15:75498744	C	ENSG00000167173	ENST00000562637	Transcript	downstream_gene_variant	-	-	-	-	-	-	IMPACT=MODIFIER;DISTANCE=268;STRAND=1;FLAGS=cds_end_NF;SYMBOL=C15orf39;SYMBOL_SOURCE=HGNC;HGNC_ID=24497;NEAREST=C15orf39
rs1873379	15:75498744	C	ENSG00000261779	ENST00000563568	Transcript	downstream_gene_variant	-	-	-	-	-	-	IMPACT=MODIFIER;DISTANCE=4898;STRAND=-1;SYMBOL=RP11-69H7.3;SYMBOL_SOURCE=Clone_based_vega_gene;NEAREST=C15orf39
rs1873379	15:75498744	C	ENSG00000167173	ENST00000563905	Transcript	downstream_gene_variant	-	-	-	-	-	-	IMPACT=MODIFIER;DISTANCE=291;STRAND=1;FLAGS=cds_end_NF;SYMBOL=C15orf39;SYMBOL_SOURCE=HGNC;HGNC_ID=24497;NEAREST=C15orf39
rs1873379	15:75498744	C	ENSG00000167173	ENST00000564848	Transcript	downstream_gene_variant	-	-	-	-	-	-	IMPACT=MODIFIER;DISTANCE=274;STRAND=1;FLAGS=cds_end_NF;SYMBOL=C15orf39;SYMBOL_SOURCE=HGNC;HGNC_ID=24497;NEAREST=C15orf39
rs1873379	15:75498744	C	ENSG00000167173	ENST00000565074	Transcript	upstream_gene_variant	-	-	-	-	-	-	IMPACT=MODIFIER;DISTANCE=41;STRAND=1;FLAGS=cds_start_NF;SYMBOL=C15orf39;SYMBOL_SOURCE=HGNC;HGNC_ID=24497;NEAREST=C15orf39
rs1873379	15:75498744	C	ENSG00000167173	ENST00000567617	Transcript	missense_variant	355	355	119	A/P	Gct/Cct	-	IMPACT=MODERATE;STRAND=1;SYMBOL=C15orf39;SYMBOL_SOURCE=HGNC;HGNC_ID=24497;NEAREST=C15orf39;SIFT=tolerated(0.1);PolyPhen=benign(0);EXON=1/2
rs11634836	15:75514313	G	ENSG00000260660	ENST00000563803	Transcript	downstream_gene_variant	-	-	-	-	-	-	IMPACT=MODIFIER;DISTANCE=4781;STRAND=-1;SYMBOL=RP11-69H7.2;SYMBOL_SOURCE=Clone_based_vega_gene;NEAREST=C15orf39
rs11634836	15:75514313	G	ENSG00000264950	ENST00000579710	Transcript	upstream_gene_variant	-	-	-	-	-	-	IMPACT=MODIFIER;DISTANCE=3899;STRAND=1;SYMBOL=AC113208.1;SYMBOL_SOURCE=Clone_based_ensembl_gene;NEAREST=C15orf39
