# Supplementary material for: GWAS for urinary sodium and potassium excretion highlights pathways shared with cardiovascular traits
Source: Nat Commun. 2019 Aug 13;10:3653. doi: 10.1038/s41467-019-11451-y (PMC6692500; doi:10.1038/s41467-019-11451-y)
Supplement: Supplementary file 7 — Supplementary Dataset 7 [file 41467_2019_11451_MOESM7_ESM.xlsx]

## Sheet: Supplementary Data 7
Supplementary Data 7: Association results for urinary sodium excretion lead SNPs after exclusion of medication use and renal diseases (N=262,531).
Results in exclusion set (N=262,531)															Results in the full set of UKB sample
SNP	CHR	BP	GENPOS	ALLELE1	ALLELE0	A1FREQ	INFO	CHISQ_LINREG	P_LINREG	BETA	SE	CHISQ_BOLT_LMM_INF	P_BOLT_LMM_INF	Gene nearest to Locus	BETA	SE	P_BOLT_LMM_INF
rs838133	19	49259529	0	A	G	0.449546	0.938588	41.5439	1.2e-10	-0.0120606	0.00167097	52.0959	5.3e-13	MLIP	-0.0133353	0.00127931	1.9e-25
rs11642015	16	53802494	0	C	T	0.598801	0.99969	26.8878	2.2e-07	-0.00943258	0.00164932	32.7079	1.1e-08	FTO	-0.0124196	0.0012606	6.7e-23
rs2472297	15	75027880	0	C	T	0.737646	1	48.115	4e-12	0.0128889	0.0018271	49.7626	1.7e-12	CYP1A1	0.0138093	0.0014017	6.7e-23
rs1260326	2	27730940	0	T	C	0.394856	1	34.0803	5.3e-09	0.00934543	0.00164638	32.2212	1.4e-08	GCKR	0.0117743	0.00126163	1e-20
rs34783010	19	46180414	0	G	T	0.804579	1	38.1092	6.7e-10	0.0115704	0.00203045	32.4719	1.2e-08	MIR642A	0.0134311	0.00156083	7.6e-18
rs2504671	6	51205577	0	C	A	0.764197	0.995478	34.7943	3.7e-09	0.0112533	0.00190435	34.9193	3.4e-09	PKHD1	0.0125233	0.00146135	1e-17
rs4410790	7	17284577	0	T	C	0.370012	1	55.2787	1e-13	0.0121723	0.00167128	53.0458	3.3e-13	AHR	0.0108651	0.00128176	2.3e-17
rs12581220	12	78773251	0	C	T	0.686006	0.989622	43.4448	4.4e-11	0.0116158	0.00174967	44.0744	3.2e-11	LINC02424	0.01034	0.00133913	1.2e-14
rs7072776	10	22032942	0	A	G	0.27685	0.990286	45.6925	1.4e-11	0.0123255	0.00181019	46.3615	9.8e-12	LINC01114	0.0103876	0.00138554	6.5e-14
rs816366	6	53995504	0	C	T	0.310784	0.998812	41.7572	1e-10	0.0107298	0.00174078	37.992	7.1e-10	LOC105378330	0.00987744	0.00133491	1.4e-13
rs33951980	7	73029437	0	C	T	0.869421	0.99729	31.6942	1.8e-08	0.0137852	0.00239332	33.1759	8.4e-09	MLXIPL	0.0131522	0.00183904	8.6e-13
rs2761589	11	31311429	0	C	G	0.369415	0.996017	37.2951	1e-09	-0.00999878	0.00167492	35.6373	2.4e-09	DCDC1	-0.00897032	0.00128298	2.7e-12
rs1513481	3	35783535	0	C	T	0.69038	0.989656	23.4383	1.3e-06	-0.00929639	0.00175005	28.2182	1.1e-07	MIR128-2	-0.00933683	0.00134101	3.3e-12
rs4788415	16	30439309	0	T	C	0.0970645	0.951989	20.7267	5.3e-06	-0.0113277	0.00278516	16.5417	4.8e-05	DCTPP1	-0.0148019	0.00214015	4.6e-12
rs13163314	5	148089587	0	C	T	0.766793	0.995107	33.5829	6.8e-09	0.0108213	0.00191175	32.0404	1.5e-08	HTR4	0.0100176	0.00146711	8.6e-12
rs1957111	14	29781178	0	C	T	0.947894	0.988289	22.7106	1.9e-06	-0.0157722	0.00364228	18.7516	1.5e-05	PRKD1	-0.018951	0.00278568	1e-11
rs117287096	19	41341413	0	G	A	0.977622	1	15.1109	0.0001	-0.0214891	0.00544959	15.5492	8e-05	CYP2A6	-0.0281939	0.00418133	1.6e-11
rs7924036	10	65191645	0	G	T	0.495837	0.999646	17.4783	2.9e-05	0.00648703	0.00161282	16.1778	5.8e-05	LINC01415	0.00833585	0.00123695	1.6e-11
rs784257	18	53397199	0	T	C	0.187511	0.987731	42.5005	7.1e-11	-0.0137274	0.00207828	43.6279	4e-11	RARB	-0.0105962	0.00159303	2.9e-11
rs7140993	14	27107166	0	G	A	0.737173	0.991361	27.0477	2e-07	0.00989343	0.00183629	29.0277	7.1e-08	MLLT10	0.00933716	0.00141075	3.6e-11
rs7334078	13	99120484	0	T	C	0.715682	0.993985	30.692	3e-08	0.00910638	0.00178946	25.8969	3.6e-07	LINC01288	0.0090649	0.00137467	4.3e-11
rs9387963	6	98423208	0	G	A	0.443911	0.999409	28.6844	8.5e-08	-0.00846776	0.00162696	27.0885	1.9e-07	FGF21	-0.00819859	0.00124605	4.7e-11
rs7619139	3	25110415	0	T	A	0.411942	0.991144	14.6288	0.00013	-0.00711751	0.00164245	18.7789	1.5e-05	TMEM161B-AS1	-0.00815329	0.00125959	9.6e-11
rs1437971	2	100986964	0	A	C	0.34828	0.971504	18.3766	1.8e-05	0.00742994	0.00171225	18.8294	1.4e-05	CHST10	0.00847493	0.00131191	1e-10
rs16850592	2	166265016	0	T	C	0.758442	0.991084	32.7971	1e-08	0.0103562	0.00188701	30.1195	4.1e-08	SCN2A	0.00931811	0.00144861	1.3e-10
rs10136360	14	79894046	0	G	A	0.779784	0.98808	27.3967	1.7e-07	-0.00990454	0.00195471	25.6746	4e-07	NRXN3	-0.00957388	0.00149765	1.6e-10
rs1229984	4	100239319	0	T	C	0.026974	1	52.5104	4.3e-13	0.0338616	0.00492358	47.2993	6.1e-12	ADH1B	0.0241902	0.00380397	2e-10
rs1996928	20	51261414	0	G	A	0.744317	0.988898	19.1139	1.2e-05	0.00849803	0.00185439	21.0007	4.6e-06	LINC01524	0.00904149	0.00142159	2e-10
rs1562308	2	61768421	0	A	C	0.395092	0.998966	14.7336	0.00012	-0.00629756	0.00164789	14.6046	0.00013	XPO1	-0.00801334	0.0012631	2.2e-10
rs9537160	13	56109838	0	C	T	0.722312	0.990716	22.0868	2.6e-06	0.00873002	0.00180587	23.3698	1.3e-06	MIR2113	0.00877585	0.00138362	2.3e-10
rs40465	5	103981726	0	T	G	0.669187	0.990193	15.6401	7.7e-05	-0.00732846	0.00171856	18.1844	2e-05	RAB9BP1	-0.00832914	0.00131672	2.5e-10
rs1516187	2	51930164	0	T	C	0.131366	0.989505	20.8494	5e-06	-0.00983292	0.00239575	16.8455	4.1e-05	LOC730100	-0.0115549	0.00183414	3e-10
rs34452566	11	27793470	0	G	T	0.801254	1	25.6503	4.1e-07	-0.0104575	0.00202018	26.7964	2.3e-07	BDNF	-0.00972968	0.00154781	3.3e-10
rs11646118	16	29926471	0	T	C	0.912546	0.990959	14.6498	0.00013	0.0101301	0.00286169	12.5309	0.0004	KCTD13	0.013771	0.00219753	3.7e-10
rs2393831	10	63466754	0	A	G	0.778038	0.997043	20.1822	7e-06	0.00890579	0.00194532	20.9586	4.7e-06	CABCOCO1	0.00928993	0.00148858	4.4e-10
rs55807911	2	28421473	0	T	C	0.802452	0.902826	14.073	0.00018	-0.00772948	0.00212581	13.2207	0.00028	LOC100505736	-0.0101316	0.00162751	4.8e-10
rs10457480	6	126812609	0	C	G	0.697404	0.995334	20.1598	7.1e-06	-0.00779929	0.00175633	19.7196	9e-06	MIR588	-0.0083187	0.00134796	6.8e-10
rs141086701	8	143361458	0	G	A	0.99158	0.868294	18.1667	2e-05	0.0348266	0.00943607	13.622	0.00022		0.0449508	0.00734433	9.3e-10
rs4442732	14	61025617	0	A	G	0.376149	0.9976	23.8594	1e-06	-0.0080616	0.00166665	23.3966	1.3e-06	SIX6	-0.00779507	0.0012767	1e-09
rs643428	1	54728858	0	C	T	0.393198	0.988699	15.4141	8.6e-05	0.00702771	0.00165725	17.9825	2.2e-05	SSBP3-AS1	0.00768192	0.00127171	1.5e-09
rs2422137	1	72619961	0	C	A	0.546591	0.990815	25.8004	3.8e-07	0.00850703	0.00162024	27.5674	1.5e-07	NEGR1	0.00750123	0.00124279	1.6e-09
rs7442885	5	87682877	0	C	G	0.786194	0.993203	14.7968	0.00012	0.00841812	0.00197107	18.2401	1.9e-05	STK24	0.00905755	0.00151146	2.1e-09
rs17635778	9	122165102	0	C	T	0.825089	0.987858	14.8987	0.00011	0.00845606	0.00213341	15.7104	7.4e-05	BRINP1	0.00974302	0.00163968	2.8e-09
rs11584700	1	204576983	0	A	G	0.791653	0.996119	27.4125	1.6e-07	0.0105577	0.00198792	28.2059	1.1e-07	LRRN2	0.00898544	0.00152048	3.4e-09
rs1036336	2	198964120	0	T	C	0.488435	0.995819	24.7209	6.6e-07	0.00762342	0.00161569	22.2631	2.4e-06	PLCL1	0.00729244	0.00123823	3.9e-09
rs5760425	22	24842452	0	T	G	0.391491	0.999044	14.8608	0.00012	0.00646277	0.00165227	15.2994	9.2e-05	SPECC1L-ADORA2A	0.00745825	0.00126653	3.9e-09
rs17123039	14	51332335	0	T	G	0.582008	0.994691	22.5397	2.1e-06	0.00750637	0.00163779	21.0061	4.6e-06	ABHD12B	0.00725318	0.00125576	7.7e-09
rs2968426	16	85335735	0	G	C	0.254177	0.988842	14.7256	0.00012	0.00682382	0.00186065	13.4501	0.00024	MIR5093	0.00822175	0.00142492	7.9e-09
rs2945091	11	28845569	0	G	A	0.440485	0.995816	16.1783	5.8e-05	0.00651445	0.00162476	16.076	6.1e-05		0.00716434	0.0012451	8.7e-09
rs72634682	8	34325317	0	G	A	0.861116	0.99434	43.8316	3.6e-11	-0.0135451	0.00234203	33.4489	7.3e-09	NOVA1-AS1	-0.0102914	0.00179502	9.8e-09
