# Supplementary material for: GWAS for urinary sodium and potassium excretion highlights pathways shared with cardiovascular traits
Source: Nat Commun. 2019 Aug 13;10:3653. doi: 10.1038/s41467-019-11451-y (PMC6692500; doi:10.1038/s41467-019-11451-y)
Supplement: Supplementary file 8 — Supplementary Dataset 8 [file 41467_2019_11451_MOESM8_ESM.xlsx]

## Sheet: Supplementary Data 8
Supplementary Data 8: Association results for urinary potassium excretion lead SNPs after exclusion of medication use and renal diseases (N=262,531).
Results in exclusion set (N=262,531)															Results in the full set (ST2d)
SNP	CHR	BP	GENPOS	ALLELE1	ALLELE0	A1FREQ	INFO	CHISQ_LINREG	P_LINREG	BETA	SE	CHISQ_BOLT_LMM_INF	P_BOLT_LMM_INF	Gene nearest to Locus	BETA	SE	P_BOLT_LMM_INF
rs10854166	19	18652844	0	A	G	0.518802	0.972036	17.0347	3.7e-05	0.00656515	0.00159835	16.8711	4e-05	FKBP8	0.00752479	0.00121538	6e-10
rs12944041	17	8073097	0	G	A	0.450597	0.992807	16.4779	4.9e-05	0.00621587	0.00159115	15.2609	9.4e-05	TMEM107	0.00700048	0.00120774	6.8e-09
rs13143189	4	3757380	0	G	A	0.564308	0.983018	38.3862	5.8e-10	0.010025	0.00160396	39.0646	4.1e-10	ADRA2C	0.0109685	0.00121798	2.1e-19
rs2122127	2	68445354	0	A	G	0.607883	0.99719	25.4901	4.4e-07	0.00826815	0.00161981	26.0549	3.3e-07	PPP3R1	0.00716293	0.0012294	5.7e-09
rs2472297	15	75027880	0	C	T	0.737607	1	31.3493	2.2e-08	0.0103317	0.00178733	33.4145	7.4e-09	CYP1A1	0.0106514	0.00135803	4.4e-15
rs254023	5	103955361	0	T	C	0.562263	0.999278	17.9685	2.2e-05	-0.00694275	0.00158931	19.0829	1.3e-05	RAB9BP1	-0.007873	0.00120633	6.7e-11
rs4410790	7	17284577	0	T	C	0.369968	1	31.8229	1.7e-08	0.00887451	0.00163599	29.4257	5.8e-08	AHR	0.00874545	0.00124235	1.9e-12
rs4973766	3	27413566	0	C	T	0.543988	0.997149	33.2571	8.1e-09	0.00967256	0.00158633	37.1787	1.1e-09	SLC4A7	0.00836621	0.0012037	3.6e-12
rs61375854	6	54546301	0	T	G	0.666548	0.994812	26.8067	2.2e-07	-0.00877858	0.00167573	27.4437	1.6e-07	FAM83B	-0.00752992	0.00127228	3.3e-09
rs6467447	7	132525147	0	C	T	0.371436	0.994044	18.8564	1.4e-05	0.00728792	0.00163573	19.8511	8.4e-06	CHCHD3	0.00720042	0.00124211	6.8e-09
rs72704791	5	547896	0	A	G	0.807277	0.99884	17.1325	3.5e-05	0.00838047	0.00199946	17.5675	2.8e-05	MIR4456	0.0106017	0.00152158	3.2e-12
rs7319172	13	67380168	0	G	A	0.433033	0.997209	14.7298	0.00012	-0.00603991	0.00159263	14.3825	0.00015		-0.00699888	0.00121032	7.4e-09
rs784257	18	53397199	0	T	C	0.187523	0.987731	26.0414	3.3e-07	-0.0105307	0.00203364	26.8141	2.2e-07	LINC01415	-0.00890228	0.00154365	8.1e-09
