# Supplementary material for: GWAS for urinary sodium and potassium excretion highlights pathways shared with cardiovascular traits
Source: Nat Commun. 2019 Aug 13;10:3653. doi: 10.1038/s41467-019-11451-y (PMC6692500; doi:10.1038/s41467-019-11451-y)
Supplement: Supplementary file 9 — Supplementary Dataset 9 [file 41467_2019_11451_MOESM9_ESM.xlsx]

## Sheet: Supplementary Data 9
Supplementary Data 9: Association of urinary sodium loci with other traits in GWAS Catalog (P < 5 × 10-8 ).
SNP	CHR	BP	LMMp10log	Category	DISEASE.TRAIT	PUBMEDID	FIRST.AUTHOR	MAPPED_GENE	CONTEXT	P.VALUE	OR.or.BETA
rs10761741	10	65066186	8.85387	Haematological	Mean platelet volume	27863252	Astle WJ	JMJD1C	intron_variant	5e-287	0.132605
rs1260326	2	27730940	20	Lipids	Triglyceride levels	28334899	Spracklen CN	GCKR	missense_variant	4e-253	0.115
rs1260326	2	27730940	20	Lipids	Triglycerides	24097068	Willer CJ	GCKR	missense_variant	2e-239	0.115
rs784257	18	53397199	10.5376	others	Fuchs's corneal dystrophy	28358029	Afshari NA	LOC105372130	intron_variant	3e-200	4.94
rs1558902	16	53803574	22.0506	Anthropometric, T2D/Metabolic	Body mass index	25673413	Locke AE	FTO	intron_variant	1e-156	0.081
rs1558902	16	53803574	22.0506	Anthropometric, T2D/Metabolic	Body mass index	25673413	Locke AE	FTO	intron_variant	8e-153	0.082
rs1260326	2	27730940	20	NA	Blood metabolite ratios	24816252	Shin SY	GCKR	missense_variant	3e-148	0.041
rs1260326	2	27730940	20	Lipids	Triglycerides	20686565	Teslovich TM	GCKR	missense_variant	6e-133	8.76
rs1558902	16	53803574	22.0506	Anthropometric, T2D/Metabolic	Body mass index	20935630	Speliotes EK	FTO	intron_variant	5e-120	0.39
rs1558902	16	53803574	22.0506	Anthropometric, T2D/Metabolic	Body mass index (joint analysis main effects and smoking interaction)	28443625	Justice AE	FTO	intron_variant	2e-115	NA
rs17145738	7	72982874	10.2218	Lipids	Triglyceride levels	28334899	Spracklen CN	BCL7B - TBL2	downstream_gene_variant	2e-110	0.115
rs1558902	16	53803574	22.0506	Anthropometric, T2D/Metabolic	BMI (adjusted for smoking behaviour)	28443625	Justice AE	FTO	intron_variant	3e-110	0.075
rs8043757	16	53813450	20.2924	Anthropometric, T2D/Metabolic	Obesity	23563607	Berndt SI	FTO	intron_variant	5e-110	1.23
rs3751812	16	53818460	19.5086	Anthropometric, T2D/Metabolic	Body mass index (joint analysis main effects and physical activity interaction)	28448500	Graff M	FTO	intron_variant	3e-109	NA
rs3751812	16	53818460	19.5086	Anthropometric, T2D/Metabolic	Body mass index (joint analysis main effects and physical activity interaction)	28448500	Graff M	FTO	intron_variant	2e-108	NA
rs3751812	16	53818460	19.5086	Anthropometric, T2D/Metabolic	Body mass index	28448500	Graff M	FTO	intron_variant	6e-108	0.0803
rs9930333	16	53799977	21.2007	Anthropometric, T2D/Metabolic	Body mass index	28448500	Graff M	FTO	intron_variant	1e-103	0.0835
rs1558902	16	53803574	22.0506	Anthropometric, T2D/Metabolic	Waist circumference	25673412	Shungin D	FTO	intron_variant	4e-101	0.0739
rs780094	2	27741237	18.8239	NA	Age-related disease endophenotypes	27790247	He L	GCKR	intron_variant	8e-101	NA
rs17145738	7	72982874	10.2218	Lipids	Triglycerides	24097068	Willer CJ	BCL7B - TBL2	downstream_gene_variant	9e-99	0.115
rs10761741	10	65066186	8.85387	Haematological	Platelet count	27863252	Astle WJ	JMJD1C	intron_variant	3e-96	0.076939
rs1558902	16	53803574	22.0506	Anthropometric, T2D/Metabolic	Body mass index	25673413	Locke AE	FTO	intron_variant	1e-93	0.084
rs780094	2	27741237	18.8239	NA	Age-related diseases, mortality and associated endophenotypes	27790247	He L	GCKR	intron_variant	4e-91	NA
rs1260326	2	27730940	20	Lipids	Triglycerides	25961943	Surakka I	GCKR	missense_variant	5e-88	0.123
rs9939973	16	53800568	21.2218	Anthropometric, T2D/Metabolic	Hip circumference	25673412	Shungin D	FTO	intron_variant	2e-86	0.07
rs1558902	16	53803574	22.0506	Anthropometric, T2D/Metabolic	Body mass index	25673413	Locke AE	FTO	intron_variant	4e-84	0.079
rs1558902	16	53803574	22.0506	Anthropometric, T2D/Metabolic	Obesity	23563607	Berndt SI	FTO	intron_variant	2e-81	1.14
rs1558902	16	53803574	22.0506	Anthropometric, T2D/Metabolic	BMI in non-smokers	28443625	Justice AE	FTO	intron_variant	1e-79	0.072
rs7185735	16	53822651	19.7212	Anthropometric, T2D/Metabolic	Obesity	23563607	Berndt SI	FTO	intron_variant	1e-79	1.33
rs1260326	2	27730940	20	NA	Blood metabolite levels	24816252	Shin SY	GCKR	missense_variant	1e-77	0.044
rs9930333	16	53799977	21.2007	Anthropometric, T2D/Metabolic	Body mass index in physically active individuals	28448500	Graff M	FTO	intron_variant	5e-72	0.0747
rs516316	19	49206145	12.7959	others	Mumps	28928442	Tian C	LOC105447645, FUT2	intron_variant	1e-71	1.25
rs9930333	16	53799977	21.2007	Anthropometric, T2D/Metabolic	Body mass index in physically active individuals	28448500	Graff M	FTO	intron_variant	2e-71	0.0762
rs9930333	16	53799977	21.2007	Anthropometric, T2D/Metabolic	Body mass index (joint analysis main effects and physical activity interaction)	28448500	Graff M	FTO	intron_variant	1e-68	NA
rs9930333	16	53799977	21.2007	Anthropometric, T2D/Metabolic	Body mass index (joint analysis main effects and physical activity interaction)	28448500	Graff M	FTO	intron_variant	2e-68	NA
rs1558902	16	53803574	22.0506	Anthropometric, T2D/Metabolic	BMI (adjusted for smoking behaviour)	28443625	Justice AE	FTO	intron_variant	7e-65	0.0806
rs9930333	16	53799977	21.2007	Anthropometric, T2D/Metabolic	Body mass index	28448500	Graff M	FTO	intron_variant	2e-64	0.0819
rs9930333	16	53799977	21.2007	Anthropometric, T2D/Metabolic	Body mass index	28448500	Graff M	FTO	intron_variant	2e-64	0.0847
rs1558902	16	53803574	22.0506	Anthropometric, T2D/Metabolic	Body mass index (joint analysis main effects and smoking interaction)	28443625	Justice AE	FTO	intron_variant	2e-63	NA
rs1558902	16	53803574	22.0506	Anthropometric, T2D/Metabolic	Body mass index (joint analysis main effects and smoking interaction)	28443625	Justice AE	FTO	intron_variant	2e-62	NA
rs1558902	16	53803574	22.0506	Anthropometric, T2D/Metabolic	BMI (adjusted for smoking behaviour)	28443625	Justice AE	FTO	intron_variant	5e-59	0.0707
rs1558902	16	53803574	22.0506	Anthropometric, T2D/Metabolic	Waist circumference	25673412	Shungin D	FTO	intron_variant	8e-59	0.0767
rs17145738	7	72982874	10.2218	Lipids	Triglycerides	20686565	Teslovich TM	BCL7B - TBL2	downstream_gene_variant	9e-59	7.91
rs8050136	16	53816275	20.0969	Anthropometric, T2D/Metabolic	Body mass index	28448500	Graff M	FTO	intron_variant	2e-58	0.0844
rs1558902	16	53803574	22.0506	Anthropometric, T2D/Metabolic	Waist circumference	25673412	Shungin D	FTO	intron_variant	1e-57	0.0714
rs1260326	2	27730940	20	NA	Blood metabolite levels	25898920	Korostishevsky M	GCKR	missense_variant	6e-56	NA
rs8050136	16	53816275	20.0969	Anthropometric, T2D/Metabolic	Body mass index (joint analysis main effects and physical activity interaction)	28448500	Graff M	FTO	intron_variant	4e-54	NA
rs780094	2	27741237	18.8239	NA	Metabolic traits	21886157	Suhre K	GCKR	intron_variant	6e-53	0.101
rs8050136	16	53816275	20.0969	Anthropometric, T2D/Metabolic	Body mass index	28448500	Graff M	FTO	intron_variant	1e-52	0.0857
rs9939973	16	53800568	21.2218	Anthropometric, T2D/Metabolic	Hip circumference	25673412	Shungin D	FTO	intron_variant	3e-52	0.0716
rs1260326	2	27730940	20	NA	Plasma lactate levels	26433129	Tin A	GCKR	missense_variant	4e-52	0.08
rs11075990	16	53819893	19.6383	Anthropometric, T2D/Metabolic	Body mass index	23563607	Berndt SI	FTO	intron_variant	2e-51	1.35
rs10740118	10	65101207	8.76955	Haematological	Platelet distribution width	27863252	Astle WJ	JMJD1C	intron_variant	3e-51	0.0548221
rs9939609	16	53820527	19.7212	Anthropometric, T2D/Metabolic	Body mass index	19079261	Willer CJ	FTO	intron_variant	4e-51	0.33
rs8050136	16	53816275	20.0969	Anthropometric, T2D/Metabolic	Body mass index	19079260	Thorleifsson G	FTO	intron_variant	1e-47	8.04
rs1260326	2	27730940	20	NA	Plasma lactate levels	26433129	Tin A	GCKR	missense_variant	2e-47	0.08
rs780093	2	27742603	18.3468	Lipids	Total cholesterol levels	28334899	Spracklen CN	GCKR	intron_variant	3e-47	0.0515
rs1558902	16	53803574	22.0506	Anthropometric, T2D/Metabolic	BMI in non-smokers	28443625	Justice AE	FTO	intron_variant	3e-45	0.0771
rs1260326	2	27730940	20	others	Urate levels	23263486	Kottgen A	GCKR	missense_variant	1e-44	0.074
rs7075195	10	65050659	8.88606	NA	Mean platelet volume	22139419	Gieger C	JMJD1C	intron_variant	2e-44	0.014
rs1558902	16	53803574	22.0506	Anthropometric, T2D/Metabolic	BMI in non-smokers	28443625	Justice AE	FTO	intron_variant	4e-44	0.0685
rs9930333	16	53799977	21.2007	Anthropometric, T2D/Metabolic	Body mass index in physically active individuals	28448500	Graff M	FTO	intron_variant	9e-44	0.074
rs9930333	16	53799977	21.2007	Anthropometric, T2D/Metabolic	Body mass index in physically active individuals	28448500	Graff M	FTO	intron_variant	2e-43	0.0763
rs9939973	16	53800568	21.2218	Anthropometric, T2D/Metabolic	Hip circumference	25673412	Shungin D	FTO	intron_variant	4e-43	0.0677
rs1260326	2	27730940	20	NA	Cholesterol, total	24097068	Willer CJ	GCKR	missense_variant	3e-42	0.051
rs3751812	16	53818460	19.5086	Anthropometric, T2D/Metabolic	Body mass index in physically inactive individuals	28448500	Graff M	FTO	intron_variant	5e-42	0.1086
rs3751812	16	53818460	19.5086	Anthropometric, T2D/Metabolic	Body mass index in physically inactive individuals	28448500	Graff M	FTO	intron_variant	5e-41	0.1039
rs9638182	7	72999105	8.72125	Lipids	Triglycerides	25961943	Surakka I	TBL2 - MLXIPL	intergenic_variant	1e-40	0.1
rs2074755	7	72877166	9.22185	NA	Age-related disease endophenotypes	27790247	He L	BAZ1B	non_coding_transcript_exon_variant	3e-40	NA
rs1260326	2	27730940	20	Autoimmune/Inflammation	C-reactive protein levels	21300955	Dehghan A	GCKR	missense_variant	5e-40	0.072
rs8050136	16	53816275	20.0969	Anthropometric, T2D/Metabolic	Type 2 diabetes	28869590	Zhao W	FTO	intron_variant	3e-39	0.106
rs8050136	16	53816275	20.0969	Anthropometric, T2D/Metabolic	Body mass index in physically active individuals	28448500	Graff M	FTO	intron_variant	4e-39	0.0792
rs1421085	16	53800954	21.8861	Anthropometric, T2D/Metabolic	Obesity	23563607	Berndt SI	FTO	intron_variant	6e-39	1.45
rs1558902	16	53803574	22.0506	Anthropometric, T2D/Metabolic	BMI in smokers	28443625	Justice AE	FTO	intron_variant	8e-39	0.0936
rs1121980	16	53809247	21.3372	Anthropometric, T2D/Metabolic	Waist-hip ratio	25673412	Shungin D	FTO	intron_variant	1e-38	0.0432
rs780094	2	27741237	18.8239	Anthropometric, T2D/Metabolic	Fasting glucose-related traits	20081858	Dupuis J	GCKR	intron_variant	6e-38	NA
rs1260326	2	27730940	20	NA	Lipid metabolism phenotypes	19936222	Chasman DI	GCKR	missense_variant	1e-37	0.07
rs2287921	19	49228272	17.2441	NA	Urinary metabolites (H-NMR features)	24586186	Rueedi R	RASIP1	non_coding_transcript_exon_variant	3e-36	0.48
rs8050136	16	53816275	20.0969	Anthropometric, T2D/Metabolic	Weight	19079260	Thorleifsson G	FTO	intron_variant	5e-36	7.05
rs1260326	2	27730940	20	NA	Lipid metabolism phenotypes	19936222	Chasman DI	GCKR	missense_variant	3e-35	0.052
rs9939609	16	53820527	19.7212	Anthropometric, T2D/Metabolic	Body mass index	17434869	Frayling TM	FTO	intron_variant	3e-35	0.36
rs1728918	2	27635463	10.4685	NA	Age-related disease endophenotypes	27790247	He L	PPM1G - NRBP1	upstream_gene_variant	5e-35	NA
rs7910927	10	65138910	10.4559	others	Sex hormone-binding globulin levels	22829776	Coviello AD	JMJD1C	intron_variant	6e-35	0.048
rs1229984	4	100239319	9.69897	Alcohol	Alcohol consumption (drinks per week)	28485404	Jorgenson E	ADH1B	missense_variant	3e-32	0.19
rs3751812	16	53818460	19.5086	Anthropometric, T2D/Metabolic	Body mass index (joint analysis main effects and physical activity interaction)	28448500	Graff M	FTO	intron_variant	3e-32	NA
rs1260326	2	27730940	20	NA	Lipid metabolism phenotypes	19936222	Chasman DI	GCKR	missense_variant	4e-32	0.075
rs281408	19	49233406	14.3768	NA	Urinary metabolites (H-NMR features)	24586186	Rueedi R	RASIP1	intron_variant	4e-32	0.42
rs780094	2	27741237	18.8239	Lipids	Triglycerides	18193043	Willer CJ	GCKR	intron_variant	6e-32	8.59
rs1229984	4	100239319	9.69897	Alcohol	Alcohol dependence	24166409	Gelernter J	ADH1B	missense_variant	1e-31	6.57895
rs1728918	2	27635463	10.4685	NA	Age-related diseases, mortality and associated endophenotypes	27790247	He L	PPM1G - NRBP1	upstream_gene_variant	1e-31	NA
rs1260326	2	27730940	20	Lipids	Triglycerides	19060906	Kathiresan S	GCKR	missense_variant	2e-31	0.12
rs681343	19	49206462	12.7959	others	Childhood ear infection	27182965	Pickrell JK	FUT2, LOC105447645	synonymous_variant	4e-30	1.10497
rs681343	19	49206462	12.7959	others	Childhood ear infection	28928442	Tian C	FUT2, LOC105447645	synonymous_variant	4e-30	1.11
rs780094	2	27741237	18.8239	NA	Triglyceride levels	28334899	Spracklen CN	GCKR	intron_variant	7e-30	0.1
rs9941349	16	53825488	18.7447	Anthropometric, T2D/Metabolic	Body mass index in physically inactive individuals	28448500	Graff M	FTO	intron_variant	2e-29	0.1169
rs1260326	2	27730940	20	NA	Lipid metabolism phenotypes	19936222	Chasman DI	GCKR	missense_variant	3e-29	0.056
rs1421085	16	53800954	21.8861	Anthropometric, T2D/Metabolic	Obesity	19151714	Meyre D	FTO	intron_variant	1e-28	NA
rs1260326	2	27730940	20	NA	Lipid metabolism phenotypes	19936222	Chasman DI	GCKR	missense_variant	3e-28	0.342
rs1421085	16	53800954	21.8861	Anthropometric, T2D/Metabolic	Obesity (early onset extreme)	23563609	Wheeler E	FTO	intron_variant	3e-28	1.44
rs9401593	6	98549801	9.29243	others	Educational attainment (years of education)	27225129	Okbay A	MIR2113 - EIF4EBP2P3	intron_variant	4e-28	0.0244707
rs3751812	16	53818460	19.5086	Anthropometric, T2D/Metabolic	Body mass index in physically inactive individuals	28448500	Graff M	FTO	intron_variant	7e-28	0.1088
rs1558902	16	53803574	22.0506	NA	Body fat percentage	26833246	Lu Y	FTO	intron_variant	4e-27	0.051
rs1260326	2	27730940	20	NA	Cholesterol, total	20686565	Teslovich TM	GCKR	missense_variant	7e-27	1.91
rs4665972	2	27598097	18.4318	Haematological	Reticulocyte fraction of red cells	27863252	Astle WJ	SNX17	intron_variant	2e-26	0.039236
rs8050136	16	53816275	20.0969	Anthropometric, T2D/Metabolic	Adiposity	21706003	Kilpelainen TO	FTO	intron_variant	3e-26	0.06
rs8050136	16	53816275	20.0969	Anthropometric, T2D/Metabolic	Type 2 diabetes	28869590	Zhao W	FTO	intron_variant	3e-26	0.107
rs1260326	2	27730940	20	others	Metabolite levels (small molecules and protein measures)	27005778	Kettunen J	GCKR	missense_variant	7e-26	0.1
rs1558902	16	53803574	22.0506	NA	Body fat percentage	26833246	Lu Y	FTO	intron_variant	1e-25	0.051
rs7910927	10	65138910	10.4559	others	Sex hormone-binding globulin levels	22829776	Coviello AD	JMJD1C	intron_variant	1e-25	0.05
rs1260326	2	27730940	20	Haematological	Platelet count	27863252	Astle WJ	GCKR	missense_variant	2e-25	0.0386043
rs2287921	19	49228272	17.2441	NA	Retinal vascular caliber	21060863	Ikram MK	RASIP1	non_coding_transcript_exon_variant	2e-25	2.1
rs10761731	10	65027610	9	Haematological	Platelet count	22139419	Gieger C	JMJD1C	intron_variant	2e-24	3.849
rs2472297	15	75027880	22.1739	GI, Diet & Lifestyle	Coffee consumption (cups per day)	25288136	Cornelis MC	CYP1A1 - CYP1A2	intergenic_variant	2e-24	0.14
rs780094	2	27741237	18.8239	Anthropometric, T2D/Metabolic	Fasting insulin-related traits	20081858	Dupuis J	GCKR	intron_variant	3e-24	NA
rs780094	2	27741237	18.8239	Anthropometric, T2D/Metabolic	Fasting glucose-related traits	20081858	Dupuis J	GCKR	intron_variant	3e-24	NA
rs1260326	2	27730940	20	NA	Lipid metabolism phenotypes	19936222	Chasman DI	GCKR	missense_variant	4e-24	0.362
rs780094	2	27741237	18.8239	Anthropometric, T2D/Metabolic	Fasting glucose-related traits (BMI interaction)	22581228	Manning AK	GCKR	intron_variant	4e-24	NA
rs1260326	2	27730940	20	Alcohol	Alcohol consumption in current drinkers	28937693	Clarke TK	GCKR	missense_variant	7e-24	0.03
rs1121980	16	53809247	21.3372	Anthropometric, T2D/Metabolic	Waist-hip ratio	25673412	Shungin D	FTO	intron_variant	1e-23	0.0484
rs10995477	10	65010672	10.2924	Haematological	Neutrophil count	27863252	Astle WJ	JMJD1C	intron_variant	2e-23	0.0357659
rs1229984	4	100239319	9.69897	Alcohol	Alcohol dependence	24166409	Gelernter J	ADH1B	missense_variant	2e-23	0.0164
rs9936385	16	53819169	19.7212	Anthropometric, T2D/Metabolic	Type 2 diabetes	22885922	Morris AP	FTO	intron_variant	3e-23	1.13
rs62048402	16	53803223	22.0555	Cancers	Breast cancer	29059683	Michailidou K	FTO	intron_variant	4e-23	0.0624
rs9940128	16	53800754	21.1427	Anthropometric, T2D/Metabolic	Body mass index	23669352	Graff M	FTO	intron_variant	4e-23	0.083
rs10995477	10	65010672	10.2924	Haematological	Sum neutrophil eosinophil counts	27863252	Astle WJ	JMJD1C	intron_variant	5e-23	0.0354984
rs7923609	10	65133822	10.5086	GI, Diet & Lifestyle	Liver enzyme levels (alkaline phosphatase)	22001757	Chambers JC	JMJD1C	intron_variant	6e-23	2.2
rs7896518	10	65104500	8.65758	Haematological	Sum basophil neutrophil counts	27863252	Astle WJ	JMJD1C	intron_variant	1e-22	0.0359733
rs1229984	4	100239319	9.69897	Alcohol	Alcohol dependence	24166409	Gelernter J	ADH1B	missense_variant	2e-22	NA
rs7916868	10	64988931	10.4559	others	Fibrinogen levels	26561523	de Vries PS	JMJD1C	intron_variant	2e-22	0.0089
rs1260326	2	27730940	20	NA	High light scatter reticulocyte percentage of red cells	27863252	Astle WJ	GCKR	missense_variant	4e-22	0.0353238
rs1558902	16	53803574	22.0506	Anthropometric, T2D/Metabolic	BMI in smokers	28443625	Justice AE	FTO	intron_variant	4e-22	0.0938
rs380743	19	49241014	19.0915	Autoimmune/Inflammation	Inflammatory skin disease	25574825	Baurecht H	RASIP1	intron_variant	4e-22	NA
rs780094	2	27741237	18.8239	Autoimmune/Inflammation	Crohn's disease	26192919	Liu JZ	GCKR	intron_variant	4e-22	NA
rs10995477	10	65010672	10.2924	Haematological	Granulocyte count	27863252	Astle WJ	JMJD1C	intron_variant	5e-22	0.0347266
rs10995477	10	65010672	10.2924	Haematological	White blood cell count	27863252	Astle WJ	JMJD1C	intron_variant	9e-22	0.034417
rs2472297	15	75027880	22.1739	GI, Diet & Lifestyle	Caffeine metabolism (plasma 1,7-dimethylxanthine (paraxanthine) to 1,3,7-trimethylxanthine (caffeine) ratio)	27702941	Cornelis MC	CYP1A1 - CYP1A2	intergenic_variant	9e-22	9.58
rs7896783	10	65162153	10.5528	others	Fibrinogen	23969696	Sabater-Lleal M	JMJD1C	intron_variant	9e-22	0.01
rs1260326	2	27730940	20	Haematological	Plateletcrit	27863252	Astle WJ	GCKR	missense_variant	1e-21	0.0356048
rs1260326	2	27730940	20	Alcohol	Alcohol consumption	28937693	Clarke TK	GCKR	missense_variant	1e-21	0.028
rs7916868	10	64988931	10.4559	others	Fibrinogen levels	28107422	de Vries PS	JMJD1C	intron_variant	1e-21	0.0097
rs17817449	16	53813367	20.0269	Cancers	Breast cancer	29059683	Michailidou K	FTO	intron_variant	3e-21	1.05263
rs7896518	10	65104500	8.65758	Haematological	Myeloid white cell count	27863252	Astle WJ	JMJD1C	intron_variant	6e-21	0.0345936
rs1260326	2	27730940	20	Haematological	White blood cell count	27863252	Astle WJ	GCKR	missense_variant	9e-21	0.0341098
rs1558902	16	53803574	22.0506	Anthropometric, T2D/Metabolic	BMI in smokers	28443625	Justice AE	FTO	intron_variant	9e-21	0.0948
rs1229984	4	100239319	9.69897	Cancers	Oral cavity and pharyngeal cancer	21437268	McKay JD	ADH1B	missense_variant	1e-20	1.56
rs2472297	15	75027880	22.1739	GI, Diet & Lifestyle	Caffeine metabolism (plasma 1,3,7-trimethylxanthine (caffeine) level)	27702941	Cornelis MC	CYP1A1 - CYP1A2	intergenic_variant	1e-20	9.34
rs516246	19	49206172	12.7696	Autoimmune/Inflammation	Crohn's disease	26192919	Liu JZ	LOC105447645, FUT2	intron_variant	1e-20	1.1214
rs1229984	4	100239319	9.69897	Alcohol	Alcohol consumption (drinkers vs non-drinkers)	28485404	Jorgenson E	ADH1B	missense_variant	2e-20	1.27
rs601338	19	49206674	12.6198	NA	Blood metabolite ratios	24816252	Shin SY	FUT2, LOC105447645	stop_gained	2e-20	0.055
rs602662	19	49206985	13.9586	NA	Folate pathway vitamin levels	19303062	Tanaka T	FUT2, LOC105447645	missense_variant	3e-20	49.77
rs780094	2	27741237	18.8239	Lipids	Triglycerides	19060911	Aulchenko YS	GCKR	intron_variant	3e-20	0.1
rs17145750	7	73026378	10.3372	others	Metabolite levels (lipoprotein measures)	27005778	Kettunen J	MLXIPL	intron_variant	4e-20	0.13
rs4665972	2	27598097	18.4318	Haematological	Reticulocyte count	27863252	Astle WJ	SNX17	intron_variant	4e-20	0.0339539
rs503279	19	49209010	13.3565	NA	Metabolic traits	21886157	Suhre K	MAMSTR, FUT2	3_prime_UTR_variant	4e-20	0.129
rs780094	2	27741237	18.8239	Anthropometric, T2D/Metabolic	Fasting glucose-related traits	20081858	Dupuis J	GCKR	intron_variant	4e-20	NA
rs780094	2	27741237	18.8239	Anthropometric, T2D/Metabolic	Fasting insulin-related traits	20081858	Dupuis J	GCKR	intron_variant	4e-20	NA
rs10761756	10	65172328	10.0362	others	Fibrinogen levels	28107422	de Vries PS	JMJD1C	intron_variant	5e-20	0.0093
rs780094	2	27741237	18.8239	NA	Metabolic syndrome	22399527	Kristiansson K	GCKR	intron_variant	6e-20	0.13
rs1260326	2	27730940	20	Haematological	Neutrophil count	27863252	Astle WJ	GCKR	missense_variant	1e-19	0.0330806
rs1260333	2	27748624	13.5229	Lipids	Triglycerides	20864672	Waterworth DM	GCKR - LOC100420668	downstream_gene_variant	2e-19	0.05
rs3751812	16	53818460	19.5086	Anthropometric, T2D/Metabolic	Body mass index in physically active individuals	28448500	Graff M	FTO	intron_variant	2e-19	0.0783
rs4410790	7	17284577	16.6383	GI, Diet & Lifestyle	Caffeine consumption	21490707	Cornelis MC	LOC101927609	intergenic_variant	2e-19	0.15
rs7072776	10	22032942	13.1871	Cancers	Breast cancer	29059683	Michailidou K	LOC107984214	downstream_gene_variant	2e-19	1.05
rs10761741	10	65066186	8.85387	NA	Vascular endothelial growth factor levels	26910538	Choi SH	JMJD1C	intron_variant	3e-19	0.08
rs7897379	10	65301725	10.4437	NA	Triglyceride levels	28334899	Spracklen CN	REEP3	intron_variant	3e-19	0.0274
rs1260326	2	27730940	20	Creatinine or Albumin traits	Serum albumin level	23022100	Franceschini N	GCKR	missense_variant	4e-19	0.0138
rs1260326	2	27730940	20	Haematological	Sum basophil neutrophil counts	27863252	Astle WJ	GCKR	missense_variant	5e-19	0.0325166
rs1558902	16	53803574	22.0506	Anthropometric, T2D/Metabolic	Obesity (early onset extreme)	20421936	Scherag A	FTO	intron_variant	5e-19	1.37
rs1558902	16	53803574	22.0506	Anthropometric, T2D/Metabolic	Waist circumference	19557197	Heard-Costa NL	FTO	intron_variant	5e-19	NA
rs2470893	15	75019449	18.8539	GI, Diet & Lifestyle	Coffee consumption	25288136	Cornelis MC	CYP1A1 - CYP1A2	upstream_gene_variant	5e-19	0.2
rs2287921	19	49228272	17.2441	NA	Urinary metabolites (H-NMR features)	24586186	Rueedi R	RASIP1	non_coding_transcript_exon_variant	7e-19	0.37
rs799165	7	73052057	11.8539	NA	Age-related disease endophenotypes	27790247	He L	MLXIPL - VPS37D	intergenic_variant	8e-19	NA
rs4665972	2	27598097	18.4318	NA	High light scatter reticulocyte count	27863252	Astle WJ	SNX17	intron_variant	1e-18	0.032467
rs613872	18	53210302	10.0177	others	Fuchs's corneal dystrophy	20825314	Baratz KH	TCF4	intron_variant	1e-18	5.47
rs7098100	10	21834536	10.6383	Cancers	Breast cancer	29059683	Michailidou K	MLLT10	intron_variant	1e-18	0.0572
rs1260326	2	27730940	20	Haematological	Sum neutrophil eosinophil counts	27863252	Astle WJ	GCKR	missense_variant	2e-18	0.032028
rs2287019	19	46202172	15.6198	Anthropometric, T2D/Metabolic	Body mass index	25673413	Locke AE	QPCTL	intron_variant	2e-18	0.035
rs8050136	16	53816275	20.0969	Anthropometric, T2D/Metabolic	Body mass index in physically inactive individuals	28448500	Graff M	FTO	intron_variant	2e-18	0.0931
rs1260326	2	27730940	20	others	Metabolite levels	22286219	Kettunen J	GCKR	missense_variant	3e-18	0.15
rs4803378	19	41333441	9.92082	others	Blood protein levels	28240269	Suhre K	CYP2F2P - CYP2A6	intron_variant	3e-18	1.304
rs7075195	10	65050659	8.88606	NA	Mean platelet volume	24026423	Shameer K	JMJD1C	intron_variant	3e-18	0.13
rs9936385	16	53819169	19.7212	Anthropometric, T2D/Metabolic	Type 2 diabetes	22885922	Morris AP	FTO	intron_variant	3e-18	1.14
rs2287019	19	46202172	15.6198	Anthropometric, T2D/Metabolic	Body mass index	25673413	Locke AE	QPCTL	intron_variant	5e-18	0.036
rs2470893	15	75019449	18.8539	GI, Diet & Lifestyle	Caffeine metabolism (plasma 1,3,7-trimethylxanthine (caffeine) level)	27702941	Cornelis MC	CYP1A1 - CYP1A2	upstream_gene_variant	5e-18	8.65
rs1260326	2	27730940	20	Haematological	Granulocyte count	27863252	Astle WJ	GCKR	missense_variant	7e-18	0.0315078
rs1421085	16	53800954	21.8861	Anthropometric, T2D/Metabolic	Obesity	19151714	Meyre D	FTO	intron_variant	7e-18	1.39
rs1121980	16	53809247	21.3372	Anthropometric, T2D/Metabolic	Waist-hip ratio	25673412	Shungin D	FTO	intron_variant	1e-17	0.0384
rs2074755	7	72877166	9.22185	NA	Age-related diseases, mortality and associated endophenotypes	27790247	He L	BAZ1B	non_coding_transcript_exon_variant	1e-17	NA
rs7141420	14	79899454	8.39794	Anthropometric, T2D/Metabolic	Obesity	23563607	Berndt SI	NRXN3	intron_variant	1e-17	1.08
rs7531118	1	72837239	8.11351	Anthropometric, T2D/Metabolic	Obesity	23563607	Berndt SI	LOC105378797	intergenic_variant	2e-17	1.08
rs780094	2	27741237	18.8239	Anthropometric, T2D/Metabolic	Type 2 diabetes	28869590	Zhao W	GCKR	intron_variant	2e-17	0.064
rs8050136	16	53816275	20.0969	Anthropometric, T2D/Metabolic	Type 2 diabetes	19056611	Timpson NJ	FTO	intron_variant	2e-17	1.3
rs8050136	16	53816275	20.0969	others	Menarche (age at onset)	25231870	Perry JR	FTO	intron_variant	2e-17	0.04
rs9939609	16	53820527	19.7212	NA	Age-related disease endophenotypes	27790247	He L	FTO	intron_variant	2e-17	NA
rs4410790	7	17284577	16.6383	GI, Diet & Lifestyle	Coffee consumption (cups per day)	25288136	Cornelis MC	LOC101927609	intergenic_variant	3e-17	0.1
rs6968554	7	17287106	16.3468	GI, Diet & Lifestyle	Caffeine metabolism (plasma 1,7-dimethylxanthine (paraxanthine) to 1,3,7-trimethylxanthine (caffeine) ratio)	27702941	Cornelis MC	LOC101927609	intergenic_variant	3e-17	8.44
rs780093	2	27742603	18.3468	others	Urate levels	20884846	Yang Q	GCKR	intron_variant	4e-17	5.15
rs492602	19	49206417	12.8861	GI, Diet & Lifestyle	Vitamin B12 levels	18776911	Hazra A	LOC105447645, FUT2	synonymous_variant	5e-17	0.09
rs17145738	7	72982874	10.2218	NA	Triglyceride levels	28334899	Spracklen CN	BCL7B - TBL2	downstream_gene_variant	7e-17	0.117
rs492602	19	49206417	12.8861	NA	Cholesterol, total	24097068	Willer CJ	LOC105447645, FUT2	synonymous_variant	1e-16	0.031
rs2287019	19	46202172	15.6198	Anthropometric, T2D/Metabolic	Body mass index	20935630	Speliotes EK	QPCTL	intron_variant	2e-16	0.15
rs35107470	15	74817689	17.0506	GI, Diet & Lifestyle	Caffeine metabolism (plasma 1,3,7-trimethylxanthine (caffeine) level)	27702941	Cornelis MC	LOC102723714 - ARID3B	intergenic_variant	2e-16	8.2
rs62466318	7	73042085	10.6383	Haematological	Reticulocyte count	27863252	Astle WJ	MLXIPL - VPS37D	upstream_gene_variant	2e-16	0.0367384
rs780093	2	27742603	18.3468	Creatinine or Albumin traits	Glomerular filtration rate (creatinine)	28452372	Gorski M	GCKR	intron_variant	2e-16	0.0081
rs780093	2	27742603	18.3468	others	Sex hormone-binding globulin levels	22829776	Coviello AD	GCKR	intron_variant	2e-16	0.032
rs62466318	7	73042085	10.6383	Haematological	Reticulocyte fraction of red cells	27863252	Astle WJ	MLXIPL - VPS37D	upstream_gene_variant	3e-16	0.036569
rs1260326	2	27730940	20	others	Resting heart rate	27798624	Eppinga RN	GCKR	missense_variant	4e-16	0.2746
rs1933721	6	98313223	9.67778	Neurological	Cognitive ability (multi-trait analysis)	29186694	Lam M	LOC101927314 - MIR2113	intron_variant	4e-16	8.141
rs1421085	16	53800954	21.8861	Anthropometric, T2D/Metabolic	Childhood body mass index	26604143	Felix JF	FTO	intron_variant	5e-16	0.059
rs1728918	2	27635463	10.4685	Autoimmune/Inflammation	Crohn's disease	23128233	Jostins L	PPM1G - NRBP1	upstream_gene_variant	5e-16	1.123
rs4410790	7	17284577	16.6383	GI, Diet & Lifestyle	Caffeine metabolism (plasma 1,7-dimethylxanthine (paraxanthine) to 1,3,7-trimethylxanthine (caffeine) ratio)	27702941	Cornelis MC	LOC101927609	intergenic_variant	7e-16	8.07
rs62466318	7	73042085	10.6383	NA	High light scatter reticulocyte count	27863252	Astle WJ	MLXIPL - VPS37D	upstream_gene_variant	8e-16	0.0359172
rs7144011	14	79940383	9.18709	Anthropometric, T2D/Metabolic	Waist circumference	25673412	Shungin D	NRXN3	intron_variant	9e-16	0.033
rs281377	19	49206603	8.46852	GI, Diet & Lifestyle	Liver enzyme levels (alkaline phosphatase)	22001757	Chambers JC	LOC105447645, FUT2	synonymous_variant	1e-15	1.8
rs3751812	16	53818460	19.5086	Anthropometric, T2D/Metabolic	Body mass index in physically inactive individuals	28448500	Graff M	FTO	intron_variant	1e-15	0.0986
rs516246	19	49206172	12.7696	Autoimmune/Inflammation	Crohn's disease	23128233	Jostins L	LOC105447645, FUT2	intron_variant	1e-15	1.107
rs1229984	4	100239319	9.69897	Cancers	Oral cavity and pharyngeal cancer	27749845	Lesseur C	ADH1B	missense_variant	2e-15	1.78987
rs602662	19	49206985	13.9586	NA	Folate pathway vitamin levels	19744961	Hazra A	FUT2, LOC105447645	missense_variant	2e-15	0.07
rs62466318	7	73042085	10.6383	NA	High light scatter reticulocyte percentage of red cells	27863252	Astle WJ	MLXIPL - VPS37D	upstream_gene_variant	3e-15	0.0351939
rs714052	7	72864869	9.14267	Lipids	Triglycerides	19060906	Kathiresan S	BAZ1B	intron_variant	3e-15	0.16
rs1558902	16	53803574	22.0506	NA	Body fat percentage	26833246	Lu Y	FTO	intron_variant	4e-15	0.051
rs2470893	15	75019449	18.8539	GI, Diet & Lifestyle	Caffeine metabolism (plasma 1,7-dimethylxanthine (paraxanthine) to 1,3,7-trimethylxanthine (caffeine) ratio)	27702941	Cornelis MC	CYP1A1 - CYP1A2	upstream_gene_variant	4e-15	7.85
rs1260326	2	27730940	20	Haematological	Myeloid white cell count	27863252	Astle WJ	GCKR	missense_variant	5e-15	0.0286908
rs12670403	7	17309279	11.4437	NA	Metabolic traits	21886157	Suhre K	LOC101927609	intergenic_variant	5e-15	0.294
rs6968554	7	17287106	16.3468	GI, Diet & Lifestyle	Coffee consumption	25288136	Cornelis MC	LOC101927609	intergenic_variant	7e-15	0.2
rs780094	2	27741237	18.8239	NA	C-reactive protein	18439548	Ridker PM	GCKR	intron_variant	7e-15	0.14
rs7141420	14	79899454	8.39794	Anthropometric, T2D/Metabolic	Body mass index	25673413	Locke AE	NRXN3	intron_variant	9e-15	0.023
rs799165	7	73052057	11.8539	NA	Age-related diseases, mortality and associated endophenotypes	27790247	He L	MLXIPL - VPS37D	intergenic_variant	9e-15	NA
rs1260326	2	27730940	20	Autoimmune/Inflammation	Inflammatory bowel disease	26192919	Liu JZ	GCKR	missense_variant	1e-14	1.08016
rs7072776	10	22032942	13.1871	Cancers	Breast cancer	25751625	Michailidou K	LOC107984214	downstream_gene_variant	1e-14	1.07
rs7141420	14	79899454	8.39794	Anthropometric, T2D/Metabolic	Body mass index	25673413	Locke AE	NRXN3	intron_variant	1e-14	0.024
rs7531118	1	72837239	8.11351	Anthropometric, T2D/Metabolic	Waist circumference	25673412	Shungin D	LOC105378797	intergenic_variant	1e-14	0.0268
rs9939609	16	53820527	19.7212	NA	Age-related diseases, mortality and associated endophenotypes	27790247	He L	FTO	intron_variant	1e-14	NA
rs11012732	10	21830104	9.25181	Cancers	Meningioma	21804547	Dobbins SE	MLLT10	intron_variant	2e-14	1.46
rs17817449	16	53813367	20.0269	Cancers	Breast cancer	25751625	Michailidou K	FTO	intron_variant	2e-14	1.07527
rs2287019	19	46202172	15.6198	Anthropometric, T2D/Metabolic	Waist circumference	25673412	Shungin D	QPCTL	intron_variant	2e-14	0.0351
rs62033400	16	53811788	20.4089	Anthropometric, T2D/Metabolic	Body mass index	24064335	Pei YF	FTO	intron_variant	2e-14	0.08
rs1260326	2	27730940	20	Creatinine or Albumin traits	Serum albumin level	23022100	Franceschini N	GCKR	missense_variant	3e-14	0.0124
rs1260326	2	27730940	20	others	Chronic kidney disease	20383146	Kottgen A	GCKR	missense_variant	3e-14	0.01
rs1260326	2	27730940	20	Creatinine or Albumin traits	Glomerular filtration rate (creatinine)	26831199	Pattaro C	GCKR	missense_variant	3e-14	0.0068
rs1800437	19	46181392	17.0315	Anthropometric, T2D/Metabolic	Obesity	23563607	Berndt SI	GIPR	missense_variant	3e-14	1.1
rs35107470	15	74817689	17.0506	GI, Diet & Lifestyle	Caffeine metabolism (plasma 1,7-dimethylxanthine (paraxanthine) to 1,3,7-trimethylxanthine (caffeine) ratio)	27702941	Cornelis MC	LOC102723714 - ARID3B	intergenic_variant	3e-14	7.58
rs1558902	16	53803574	22.0506	Anthropometric, T2D/Metabolic	Childhood body mass index	26604143	Felix JF	FTO	intron_variant	4e-14	NA
rs7072776	10	22032942	13.1871	Cancers	Breast cancer	23535729	Michailidou K	LOC107984214	downstream_gene_variant	4e-14	1.07
rs2470893	15	75019449	18.8539	GI, Diet & Lifestyle	Caffeine consumption	21490707	Cornelis MC	CYP1A1 - CYP1A2	upstream_gene_variant	5e-14	0.12
rs2472297	15	75027880	22.1739	GI, Diet & Lifestyle	Coffee consumption	21357676	Sulem P	CYP1A1 - CYP1A2	intergenic_variant	5e-14	0.31
rs1260326	2	27730940	20	others	Glomerular filtration rate	27588450	Mahajan A	GCKR	missense_variant	6e-14	0.872
rs1260326	2	27730940	20	NA	Blood metabolite levels	24816252	Shin SY	GCKR	missense_variant	6e-14	0.013
rs17817449	16	53813367	20.0269	Cancers	Breast cancer	23535729	Michailidou K	FTO	intron_variant	6e-14	1.08
rs1558902	16	53803574	22.0506	NA	Body fat percentage	26833246	Lu Y	FTO	intron_variant	7e-14	0.05
rs8050136	16	53816275	20.0969	Anthropometric, T2D/Metabolic	Type 2 diabetes	17463249	Zeggini E	FTO	intron_variant	7e-14	1.23
rs13247874	7	73010442	9.45593	NA	Lipid metabolism phenotypes	22286219	Kettunen J	MLXIPL	intron_variant	8e-14	0.16
rs6968554	7	17287106	16.3468	NA	Blood metabolite levels	24816252	Shin SY	LOC101927609	intergenic_variant	9e-14	0.064
rs1558902	16	53803574	22.0506	NA	Body fat percentage	26833246	Lu Y	FTO	intron_variant	1e-13	0.051
rs2326451	6	126811928	8.45593	Haematological	Hematocrit	27863252	Astle WJ	MIR588 - RNU6-200P	intergenic_variant	1e-13	0.0263519
rs503279	19	49209010	13.3565	NA	Blood metabolite ratios	24816252	Shin SY	MAMSTR, FUT2	3_prime_UTR_variant	1e-13	0.045
rs516246	19	49206172	12.7696	Autoimmune/Inflammation	Inflammatory bowel disease	26192919	Liu JZ	LOC105447645, FUT2	intron_variant	1e-13	1.07849
rs1558902	16	53803574	22.0506	NA	Body fat percentage	26833246	Lu Y	FTO	intron_variant	2e-13	0.051
rs4410790	7	17284577	16.6383	GI, Diet & Lifestyle	Caffeine metabolism (plasma 1,3,7-trimethylxanthine (caffeine) level)	27702941	Cornelis MC	LOC101927609	intergenic_variant	2e-13	7.36
rs7910927	10	65138910	10.4559	others	Sex hormone-binding globulin levels	22829776	Coviello AD	JMJD1C	intron_variant	2e-13	0.046
rs11588857	1	204587047	8.3279	others	Educational attainment (years of education)	27225129	Okbay A	LRRN2, LOC105371692	missense_variant	3e-13	0.019845
rs1260326	2	27730940	20	NA	Cholesterol, total	25961943	Surakka I	GCKR	missense_variant	3e-13	0.045
rs10423928	19	46182304	16.6576	Anthropometric, T2D/Metabolic	Obesity	23563607	Berndt SI	GIPR	intron_variant	4e-13	1.16
rs1260326	2	27730940	20	GI, Diet & Lifestyle	Liver enzyme levels (gamma-glutamyl transferase)	22001757	Chambers JC	GCKR	missense_variant	4e-13	3.2
rs9388489	6	126698719	8.10791	Anthropometric, T2D/Metabolic	Type 1 diabetes	19430480	Barrett JC	CENPW	intergenic_variant	4e-13	1.17
rs13233571	7	72971231	10.0223	Lipids	HDL cholesterol levels	28334899	Spracklen CN	BCL7B	intron_variant	5e-13	0.0398
rs1421085	16	53800954	21.8861	Anthropometric, T2D/Metabolic	Obesity	19151714	Meyre D	FTO	intron_variant	5e-13	1.25
rs17145738	7	72982874	10.2218	Lipids	HDL cholesterol	24097068	Willer CJ	BCL7B - TBL2	downstream_gene_variant	5e-13	0.041
rs4895808	6	126781434	8.55284	others	Menarche (age at onset)	25231870	Perry JR	CENPW	intergenic_variant	5e-13	0.03
rs6968554	7	17287106	16.3468	GI, Diet & Lifestyle	Caffeine metabolism (plasma 1,3,7-trimethylxanthine (caffeine) level)	27702941	Cornelis MC	LOC101927609	intergenic_variant	5e-13	7.22
rs1260326	2	27730940	20	Anthropometric, T2D/Metabolic	Glycemic traits (pregnancy)	23903356	Hayes MG	GCKR	missense_variant	6e-13	0.0044
rs602662	19	49206985	13.9586	GI, Diet & Lifestyle	Vitamin B12 levels	28334792	Nongmaithem SS	FUT2, LOC105447645	missense_variant	6e-13	0.18
rs492602	19	49206417	12.8861	Autoimmune/Inflammation	Psoriasis	28537254	Tsoi LC	LOC105447645, FUT2	synonymous_variant	7e-13	1.11
rs7144011	14	79940383	9.18709	Anthropometric, T2D/Metabolic	Waist circumference	25673412	Shungin D	NRXN3	intron_variant	7e-13	0.0406
rs9936385	16	53819169	19.7212	Anthropometric, T2D/Metabolic	Lean body mass	28724990	Zillikens MC	FTO	intron_variant	7e-13	0.15
rs6484504	11	31424823	8.29243	Haematological	Red blood cell count	27863252	Astle WJ	DNAJC24	intron_variant	9e-13	0.0285327
rs7144011	14	79940383	9.18709	Anthropometric, T2D/Metabolic	Hip circumference	25673412	Shungin D	NRXN3	intron_variant	9e-13	0.0304
rs1260326	2	27730940	20	others	Metabolite levels	22916037	Inouye M	GCKR	missense_variant	1e-12	NA
rs1558902	16	53803574	22.0506	others	Menarche (age at onset)	27182965	Pickrell JK	FTO	intron_variant	1e-12	0.031
rs2240466	7	72856269	9.0655	Lipids	Triglycerides	19060911	Aulchenko YS	BAZ1B	3_prime_UTR_variant	1e-12	0.14
rs2287921	19	49228272	17.2441	NA	Urinary metabolites (H-NMR features)	24586186	Rueedi R	RASIP1	non_coding_transcript_exon_variant	1e-12	0.3
rs8050136	16	53816275	20.0969	Anthropometric, T2D/Metabolic	Type 2 diabetes	17463248	Scott LJ	FTO	intron_variant	1e-12	1.17
rs9936385	16	53819169	19.7212	Anthropometric, T2D/Metabolic	Type 2 diabetes	24509480	Mahajan A	FTO	intron_variant	1e-12	1.13
rs1260326	2	27730940	20	Haematological	Lymphocyte counts	27863252	Astle WJ	GCKR	missense_variant	2e-12	0.025744
rs1260326	2	27730940	20	Creatinine or Albumin traits	Glomerular filtration rate in non diabetics (creatinine)	26831199	Pattaro C	GCKR	missense_variant	2e-12	0.0065
rs1538170	6	126752874	8.33724	Anthropometric, T2D/Metabolic	Hip circumference adjusted for BMI	25673412	Shungin D	CENPW	intergenic_variant	2e-12	0.0263
rs17145738	7	72982874	10.2218	Lipids	Triglycerides	18193043	Willer CJ	BCL7B - TBL2	downstream_gene_variant	2e-12	8.21
rs17817449	16	53813367	20.0269	Anthropometric, T2D/Metabolic	Obesity	21552555	Wang K	FTO	intron_variant	2e-12	NA
rs7141420	14	79899454	8.39794	Anthropometric, T2D/Metabolic	Body mass index	28448500	Graff M	NRXN3	intron_variant	2e-12	0.0248
rs73931391	19	41407874	9.4318	GI, Diet & Lifestyle	nicotine metabolite ratio in current smokers	27488534	Patel YM	LOC107985299	downstream_gene_variant	2e-12	0.5852
rs780093	2	27742603	18.3468	Lipids	Waist Circumference - Triglycerides (WC-TG)	21386085	Kraja AT	GCKR	intron_variant	2e-12	0.19
rs10761731	10	65027610	9	Lipids	Triglycerides	20686565	Teslovich TM	JMJD1C	intron_variant	3e-12	2.38
rs2287019	19	46202172	15.6198	Anthropometric, T2D/Metabolic	Body mass index	25673413	Locke AE	QPCTL	intron_variant	3e-12	0.039
rs6957745	7	73056750	9.16115	Haematological	Monocyte percentage of white cells	27863252	Astle WJ	MLXIPL - VPS37D	regulatory_region_variant	4e-12	0.0308444
rs780093	2	27742603	18.3468	Lipids	Palmitoleic acid (16:1n-7) levels	28298293	Hu Y	GCKR	intron_variant	4e-12	0.019
rs7141420	14	79899454	8.39794	Anthropometric, T2D/Metabolic	BMI (adjusted for smoking behaviour)	28443625	Justice AE	NRXN3	intron_variant	5e-12	0.022
rs780094	2	27741237	18.8239	Anthropometric, T2D/Metabolic	Height	25282103	Wood AR	GCKR	intron_variant	6e-12	0.021
rs9941349	16	53825488	18.7447	Anthropometric, T2D/Metabolic	Obesity (extreme)	19553259	Cotsapas C	FTO	intron_variant	6e-12	1.48
rs281379	19	49214274	12.6021	Autoimmune/Inflammation	Crohn's disease	21102463	Franke A	MAMSTR	downstream_gene_variant	7e-12	1.07
rs10761731	10	65027610	9	Lipids	Triglycerides	24097068	Willer CJ	JMJD1C	intron_variant	8e-12	0.031
rs11584700	1	204576983	8.46852	others	Educational attainment	23722424	Rietveld CA	LOC105371692	intron_variant	8e-12	1.09
rs1260326	2	27730940	20	Haematological	Red cell distribution width	27863252	Astle WJ	GCKR	missense_variant	9e-12	0.0245671
rs2287922	19	49232226	17.7212	NA	Mean platelet volume	27863252	Astle WJ	RASIP1	missense_variant	1e-11	0.0244899
rs7141420	14	79899454	8.39794	Anthropometric, T2D/Metabolic	Body mass index	25673413	Locke AE	NRXN3	intron_variant	1e-11	0.026
rs7141420	14	79899454	8.39794	Anthropometric, T2D/Metabolic	Body mass index	28448500	Graff M	NRXN3	intron_variant	1e-11	0.0303
rs7141420	14	79899454	8.39794	Anthropometric, T2D/Metabolic	Body mass index (joint analysis main effects and smoking interaction)	28443625	Justice AE	NRXN3	intron_variant	1e-11	NA
rs10510554	3	25099776	9.29243	Anthropometric, T2D/Metabolic	Body mass index (joint analysis main effects and physical activity interaction)	28448500	Graff M	RARB	intron_variant	2e-11	NA
rs12206087	6	98582900	8.92082	Neurological	Cognitive ability	29186694	Lam M	MIR2113 - EIF4EBP2P3	intron_variant	2e-11	6.695
rs13226650	7	73017005	9.82391	NA	Metabolic syndrome	22399527	Kristiansson K	MLXIPL	intron_variant	2e-11	0.12
rs163879	11	30951674	8.72125	others	Bone mineral density	22504420	Estrada K	DCDC5	intron_variant	2e-11	0.04
rs2470893	15	75019449	18.8539	GI, Diet & Lifestyle	Coffee consumption	21876539	Amin N	CYP1A1 - CYP1A2	upstream_gene_variant	2e-11	0.0675
rs6968865	7	17287269	16.041	GI, Diet & Lifestyle	Coffee consumption	21357676	Sulem P	LOC101927609	intergenic_variant	2e-11	0.26
rs7141420	14	79899454	8.39794	Anthropometric, T2D/Metabolic	Body mass index (joint analysis main effects and physical activity interaction)	28448500	Graff M	NRXN3	intron_variant	2e-11	NA
rs7144011	14	79940383	9.18709	Anthropometric, T2D/Metabolic	Hip circumference	25673412	Shungin D	NRXN3	intron_variant	2e-11	0.0395
rs10150332	14	79936964	9.19382	Anthropometric, T2D/Metabolic	Body mass index	20935630	Speliotes EK	NRXN3	intron_variant	3e-11	0.13
rs10761731	10	65027610	9	Haematological	Neutrophil percentage of white cells	27863252	Astle WJ	JMJD1C	intron_variant	3e-11	0.0240605
rs601338	19	49206674	12.6198	NA	Blood metabolite levels	24816252	Shin SY	FUT2, LOC105447645	stop_gained	3e-11	0.041
rs7141420	14	79899454	8.39794	Anthropometric, T2D/Metabolic	BMI (adjusted for smoking behaviour)	28443625	Justice AE	NRXN3	intron_variant	3e-11	0.0278
rs7141420	14	79899454	8.39794	Anthropometric, T2D/Metabolic	Body mass index (joint analysis main effects and smoking interaction)	28443625	Justice AE	NRXN3	intron_variant	3e-11	NA
rs7800944	7	73035857	10.8861	GI, Diet & Lifestyle	Coffee consumption (cups per day)	25288136	Cornelis MC	MLXIPL	intron_variant	3e-11	0.05
rs79600176	19	41392490	10	GI, Diet & Lifestyle	Caffeine metabolism (plasma 1,7-dimethylxanthine (paraxanthine) to 1,3,7-trimethylxanthine (caffeine) ratio)	27702941	Cornelis MC	CYP2A7 - CYP2G1P	intron_variant	3e-11	6.64
rs516246	19	49206172	12.7696	Autoimmune/Inflammation	Crohn's disease	28067908	de Lange KM	LOC105447645, FUT2	intron_variant	4e-11	NA
rs6957745	7	73056750	9.16115	Haematological	Granulocyte percentage of myeloid white cells	27863252	Astle WJ	MLXIPL - VPS37D	regulatory_region_variant	4e-11	0.029465
rs7141420	14	79899454	8.39794	Anthropometric, T2D/Metabolic	BMI in non-smokers	28443625	Justice AE	NRXN3	intron_variant	4e-11	0.0237
rs7531118	1	72837239	8.11351	Anthropometric, T2D/Metabolic	Hip circumference	25673412	Shungin D	LOC105378797	intergenic_variant	4e-11	0.0241
rs7896518	10	65104500	8.65758	Neurological	Cognitive ability (multi-trait analysis)	29186694	Lam M	JMJD1C	intron_variant	4e-11	6.619
rs7141420	14	79899454	8.39794	Anthropometric, T2D/Metabolic	Body mass index (joint analysis main effects and physical activity interaction)	28448500	Graff M	NRXN3	intron_variant	5e-11	NA
rs780093	2	27742603	18.3468	Autoimmune/Inflammation	Crohn's disease	21102463	Franke A	GCKR	intron_variant	5e-11	1.15
rs10510554	3	25099776	9.29243	Anthropometric, T2D/Metabolic	Body mass index	28448500	Graff M	RARB	intron_variant	6e-11	0.0233
rs1260326	2	27730940	20	Anthropometric, T2D/Metabolic	Glycemic traits (pregnancy)	23903356	Hayes MG	GCKR	missense_variant	6e-11	0.0116
rs1260326	2	27730940	20	Autoimmune/Inflammation	Crohn's disease	28067908	de Lange KM	GCKR	missense_variant	6e-11	NA
rs9936385	16	53819169	19.7212	Anthropometric, T2D/Metabolic	Type 2 diabetes	22885922	Morris AP	FTO	intron_variant	6e-11	1.12
rs10822145	10	64934548	10.3188	Lipids	Triglycerides	25961943	Surakka I	JMJD1C	intron_variant	7e-11	0.038
rs35106244	19	49203829	10.6778	NA	diarrhoeal disease at age 1 with doctor diagnosis	27559109	Bustamante M	FUT2	intron_variant	7e-11	1.27
rs4666002	2	27840640	15.0706	Lipids	Phospholipid levels (plasma)	22359512	Demirkan A	ZNF512	intron_variant	7e-11	0
rs28399442	19	41354458	10.0269	GI, Diet & Lifestyle	Caffeine metabolism (plasma 1,7-dimethylxanthine (paraxanthine) to 1,3,7-trimethylxanthine (caffeine) ratio)	27702941	Cornelis MC	CYP2A6	intron_variant	9e-11	6.48
rs780093	2	27742603	18.3468	others	Sex hormone-binding globulin levels	22829776	Coviello AD	GCKR	intron_variant	9e-11	0.041
rs11672660	19	46180184	16.9208	Anthropometric, T2D/Metabolic	Body mass index	28448500	Graff M	GIPR	intron_variant	1e-10	0.0305
rs3812316	7	73020337	11.3565	Lipids	Triglycerides	18193046	Kooner JS	MLXIPL	missense_variant	1e-10	10.5
rs7141420	14	79899454	8.39794	Anthropometric, T2D/Metabolic	Body mass index	28448500	Graff M	NRXN3	intron_variant	1e-10	0.0241
rs780094	2	27741237	18.8239	GI, Diet & Lifestyle	Calcium levels	24068962	O'Seaghdha CM	GCKR	intron_variant	1e-10	0.017
rs1538170	6	126752874	8.33724	Anthropometric, T2D/Metabolic	Hip circumference adjusted for BMI	25673412	Shungin D	CENPW	intergenic_variant	2e-10	0.0338
rs17817449	16	53813367	20.0269	Cancers	Breast cancer (estrogen-receptor negative)	29058716	Milne RL	FTO	intron_variant	2e-10	1.07527
rs492602	19	49206417	12.8861	NA	Cholesterol, total	20686565	Teslovich TM	LOC105447645, FUT2	synonymous_variant	2e-10	1.27
rs7141420	14	79899454	8.39794	Anthropometric, T2D/Metabolic	Body mass index in physically active individuals	28448500	Graff M	NRXN3	intron_variant	2e-10	0.0315
rs7202116	16	53821615	19.6383	Anthropometric, T2D/Metabolic	Body mass index	22982992	Yang J	FTO	intron_variant	2e-10	0.036
rs7531118	1	72837239	8.11351	Anthropometric, T2D/Metabolic	Waist circumference	25673412	Shungin D	LOC105378797	intergenic_variant	2e-10	0.0287
rs780093	2	27742603	18.3468	Lipids	circulating leptin levels	26833098	KilpelÃ¤inen TO	GCKR	intron_variant	2e-10	0.032
rs9385399	6	126759033	8.49485	Anthropometric, T2D/Metabolic	Infant length	25281659	van der Valk RJ	CENPW	intergenic_variant	2e-10	0.055
rs7141420	14	79899454	8.39794	Anthropometric, T2D/Metabolic	Body mass index (joint analysis main effects and physical activity interaction)	28448500	Graff M	NRXN3	intron_variant	3e-10	NA
rs780093	2	27742603	18.3468	Lipids	Triglycerides-Blood Pressure (TG-BP)	21386085	Kraja AT	GCKR	intron_variant	3e-10	0.18
rs780094	2	27741237	18.8239	Anthropometric, T2D/Metabolic	Fasting insulin-related traits (BMI interaction)	22581228	Manning AK	GCKR	intron_variant	3e-10	NA
rs2470893	15	75019449	18.8539	Haematological	Platelet distribution width	27863252	Astle WJ	CYP1A1 - CYP1A2	upstream_gene_variant	4e-10	0.0238806
rs7141420	14	79899454	8.39794	Anthropometric, T2D/Metabolic	Body mass index in physically active individuals	28448500	Graff M	NRXN3	intron_variant	4e-10	0.025
rs780093	2	27742603	18.3468	Lipids	circulating leptin levels adjusted for BMI	26833098	KilpelÃ¤inen TO	GCKR	intron_variant	4e-10	0.024
rs838145	19	49248730	13.8239	NA	Dietary macronutrient intake	23636237	Tanaka T	IZUMO1	non_coding_transcript_exon_variant	4e-10	0.22
rs12355784	10	65121565	10.4559	GI, Diet & Lifestyle	Liver enzyme levels	18940312	Yuan X	JMJD1C	intron_variant	5e-10	0.03
rs7141420	14	79899454	8.39794	Anthropometric, T2D/Metabolic	Body mass index	28448500	Graff M	NRXN3	intron_variant	6e-10	0.0297
rs7531118	1	72837239	8.11351	Anthropometric, T2D/Metabolic	Hip circumference	25673412	Shungin D	LOC105378797	intergenic_variant	6e-10	0.0295
rs10761779	10	65274927	10.6383	GI, Diet & Lifestyle	Liver enzyme levels	18940312	Yuan X	JMJD1C	intron_variant	7e-10	0.03
rs1115240	14	27090388	9.88606	others	Educational attainment (years of education)	27225129	Okbay A	LOC102725045	intron_variant	7e-10	0.015739
rs11672660	19	46180184	16.9208	Anthropometric, T2D/Metabolic	Hip circumference	25673412	Shungin D	GIPR	intron_variant	7e-10	0.028
rs1260326	2	27730940	20	Haematological	Hematocrit	27863252	Astle WJ	GCKR	missense_variant	8e-10	0.0220937
rs516246	19	49206172	12.7696	GI, Diet & Lifestyle	Liver enzyme levels (gamma-glutamyl transferase)	22001757	Chambers JC	LOC105447645, FUT2	intron_variant	8e-10	2.3
rs6804842	3	25106437	9.22915	Anthropometric, T2D/Metabolic	Body mass index	25673413	Locke AE	RARB	intron_variant	8e-10	0.018
rs7531118	1	72837239	8.11351	Anthropometric, T2D/Metabolic	Body mass index	28448500	Graff M	LOC105378797	intergenic_variant	8e-10	0.029
rs1254257	14	60832179	8.45593	Anthropometric, T2D/Metabolic	Hip circumference adjusted for BMI	25673412	Shungin D	LOC101927729 - RBM8B	intergenic_variant	9e-10	0.0294
rs1260326	2	27730940	20	Haematological	Platelet count	22139419	Gieger C	GCKR	missense_variant	9e-10	2.334
rs2287019	19	46202172	15.6198	Anthropometric, T2D/Metabolic	Body mass index	25673413	Locke AE	QPCTL	intron_variant	9e-10	0.032
rs1229984	4	100239319	9.69897	Cancers	Oral cavity cancer	27749845	Lesseur C	ADH1B	missense_variant	1e-09	1.74368
rs1243180	10	21915619	9.92082	Cancers	Epithelial ovarian cancer	25581431	Kuchenbaecker KB	MLLT10	intron_variant	1e-09	1.1
rs1421085	16	53800954	21.8861	NA	Dietary macronutrient intake	23636237	Tanaka T	FTO	intron_variant	1e-09	0.1
rs17145738	7	72982874	10.2218	Lipids	HDL cholesterol	20686565	Teslovich TM	BCL7B - TBL2	downstream_gene_variant	1e-09	0.57
rs1906252	6	98550289	9.26761	others	Educational attainment	27046643	Davies G	MIR2113 - EIF4EBP2P3	intron_variant	1e-09	0.0261309
rs3749147	2	27851918	15.1249	Lipids	Waist Circumference - Triglycerides (WC-TG)	21386085	Kraja AT	GPN1	missense_variant	1e-09	0.18
rs4858697	3	25116582	9.95861	Anthropometric, T2D/Metabolic	Body mass index	28448500	Graff M	RARB	intron_variant	1e-09	0.037
rs6804842	3	25106437	9.22915	Anthropometric, T2D/Metabolic	Body mass index (joint analysis main effects and physical activity interaction)	28448500	Graff M	RARB	intron_variant	1e-09	NA
rs7185735	16	53822651	19.7212	Anthropometric, T2D/Metabolic	Subcutaneous adipose tissue	27918534	Chu AY	FTO	intron_variant	1e-09	6.05
rs780092	2	27743154	8.95861	Lipids	Total cholesterol levels	28334899	Spracklen CN	GCKR	intron_variant	1e-09	0.053
rs780093	2	27742603	18.3468	Lipids	Palmitoleic acid (16:1n-7) levels	23362303	Wu JH	GCKR	intron_variant	1e-09	0.02
rs780094	2	27741237	18.8239	others	Uric acid levels	19503597	Kolz M	GCKR	intron_variant	1e-09	0.05
rs8043757	16	53813450	20.2924	Lipids	circulating leptin levels	26833098	KilpelÃ¤inen TO	FTO	intron_variant	1e-09	0.03
rs10146997	14	79945162	9.14267	Anthropometric, T2D/Metabolic	Type 2 diabetes	28566273	Scott RA	NRXN3	intron_variant	2e-09	1.07
rs10275488	7	17303778	11.2366	GI, Diet & Lifestyle	Caffeine metabolism (plasma 1,7-dimethylxanthine (paraxanthine) to 1,3,7-trimethylxanthine (caffeine) ratio)	27702941	Cornelis MC	LOC101927609	intergenic_variant	2e-09	5.98
rs10510554	3	25099776	9.29243	Anthropometric, T2D/Metabolic	Body mass index	28448500	Graff M	RARB	intron_variant	2e-09	0.0228
rs11588857	1	204587047	8.3279	Neurological	Cognitive ability (multi-trait analysis)	29186694	Lam M	LRRN2, LOC105371692	missense_variant	2e-09	5.967
rs11672660	19	46180184	16.9208	Anthropometric, T2D/Metabolic	Body mass index in physically active individuals	28448500	Graff M	GIPR	intron_variant	2e-09	0.0321
rs1487441	6	98553894	9.27572	others	Educational attainment	25201988	Rietveld CA	MIR2113 - EIF4EBP2P3	intron_variant	2e-09	0.026
rs16921914	11	31210771	10.4202	others	Bone mineral density (spine)	19801982	Rivadeneira F	DCDC5 - DCDC1	intron_variant	2e-09	0.08
rs1800437	19	46181392	17.0315	Anthropometric, T2D/Metabolic	Body mass index in physically active individuals	28448500	Graff M	GIPR	missense_variant	2e-09	0.0333
rs1919128	2	27801759	15.0969	Lipids	Waist Circumference - Triglycerides (WC-TG)	21386085	Kraja AT	C2orf16	missense_variant	2e-09	0.18
rs6804842	3	25106437	9.22915	Anthropometric, T2D/Metabolic	Body mass index	25673413	Locke AE	RARB	intron_variant	2e-09	0.019
rs7141420	14	79899454	8.39794	Anthropometric, T2D/Metabolic	Body mass index (joint analysis main effects and physical activity interaction)	28448500	Graff M	NRXN3	intron_variant	2e-09	NA
rs9940128	16	53800754	21.1427	NA	Metabolic syndrome	22399527	Kristiansson K	FTO	intron_variant	2e-09	0.09
rs11672660	19	46180184	16.9208	Anthropometric, T2D/Metabolic	Body mass index (joint analysis main effects and physical activity interaction)	28448500	Graff M	GIPR	intron_variant	3e-09	NA
rs11672660	19	46180184	16.9208	Anthropometric, T2D/Metabolic	Body mass index	28448500	Graff M	GIPR	intron_variant	3e-09	0.0294
rs17145750	7	73026378	10.3372	GI, Diet & Lifestyle	Liver enzyme levels (gamma-glutamyl transferase)	22001757	Chambers JC	MLXIPL	intron_variant	3e-09	4.5
rs17145750	7	73026378	10.3372	Haematological	Platelet count	27863252	Astle WJ	MLXIPL	intron_variant	3e-09	0.0293593
rs3789045	1	204586812	8.38722	others	Educational attainment (college completion)	27225129	Okbay A	LOC105371692, LRRN2	3_prime_UTR_variant	3e-09	1.04338
rs6804842	3	25106437	9.22915	Anthropometric, T2D/Metabolic	Body mass index	28448500	Graff M	RARB	intron_variant	3e-09	0.0333
rs10457441	6	98572120	9.35655	Neurological	Cognitive function	25644384	Davies G	MIR2113 - EIF4EBP2P3	intron_variant	4e-09	0.0324
rs13233571	7	72971231	10.0223	Autoimmune/Inflammation	C-reactive protein levels	21300955	Dehghan A	BCL7B	intron_variant	4e-09	0.054
rs2287019	19	46202172	15.6198	Anthropometric, T2D/Metabolic	Waist circumference	25673412	Shungin D	QPCTL	intron_variant	4e-09	0.0376
rs2287019	19	46202172	15.6198	Anthropometric, T2D/Metabolic	Waist-hip ratio	25673412	Shungin D	QPCTL	intron_variant	4e-09	0.0263
rs4858697	3	25116582	9.95861	Anthropometric, T2D/Metabolic	Body mass index (joint analysis main effects and physical activity interaction)	28448500	Graff M	RARB	intron_variant	4e-09	NA
rs7141420	14	79899454	8.39794	Anthropometric, T2D/Metabolic	Body mass index in physically active individuals	28448500	Graff M	NRXN3	intron_variant	4e-09	0.0246
rs10275488	7	17303778	11.2366	GI, Diet & Lifestyle	Caffeine metabolism (plasma 1,3,7-trimethylxanthine (caffeine) level)	27702941	Cornelis MC	LOC101927609	intergenic_variant	5e-09	5.85
rs13022873	2	27815510	15.1308	Lipids	Waist Circumference - Triglycerides (WC-TG)	21386085	Kraja AT	ZNF512	intron_variant	5e-09	0.17
rs1800437	19	46181392	17.0315	Anthropometric, T2D/Metabolic	Body mass index (joint analysis main effects and physical activity interaction)	28448500	Graff M	GIPR	missense_variant	5e-09	NA
rs632111	19	49208978	13.5229	NA	Serum lipase activity	25028398	Weiss FU	MAMSTR, FUT2	3_prime_UTR_variant	6e-09	0.04
rs10761741	10	65066186	8.85387	others	Educational attainment (years of education)	27225129	Okbay A	JMJD1C	intron_variant	7e-09	0.0130623
rs1121980	16	53809247	21.3372	Lipids	HDL cholesterol	24097068	Willer CJ	FTO	intron_variant	7e-09	0.02
rs1254257	14	60832179	8.45593	Anthropometric, T2D/Metabolic	Hip circumference adjusted for BMI	25673412	Shungin D	LOC101927729 - RBM8B	intergenic_variant	7e-09	0.034
rs1260326	2	27730940	20	Lipids	Hypertriglyceridemia	20657596	Johansen CT	GCKR	missense_variant	7e-09	1.75
rs2287019	19	46202172	15.6198	Anthropometric, T2D/Metabolic	BMI (adjusted for smoking behaviour)	28443625	Justice AE	QPCTL	intron_variant	7e-09	0.0276
rs838133	19	49259529	24.7212	GI, Diet & Lifestyle	Homocysteine levels	23824729	van Meurs JB	FGF21	synonymous_variant	7e-09	0.0422
rs10740118	10	65101207	8.76955	Lipids	Plasma omega-6 polyunsaturated fatty acid levels (linoleic acid)	24823311	Guan W	JMJD1C	intron_variant	8e-09	0.25
rs780094	2	27741237	18.8239	Haematological	Red blood cell count	27863252	Astle WJ	GCKR	intron_variant	8e-09	0.020971
rs838133	19	49259529	24.7212	NA	Dietary macronutrient intake	23372041	Chu AY	FGF21	synonymous_variant	8e-09	0.11
rs1229984	4	100239319	9.69897	Cancers	Oropharynx cancer	27749845	Lesseur C	ADH1B	missense_variant	9e-09	1.83217
rs780094	2	27741237	18.8239	Lipids	Plasma omega-3 polyunsaturated fatty acid levels (docosapentaenoic acid)	21829377	Lemaitre RN	GCKR	intron_variant	9e-09	0.02
rs10822184	10	65337153	9.50864	others	Androgen levels	22936694	Jin G	REEP3	intron_variant	1e-08	0.058
rs12202969	6	98576223	8.95861	Neurological	Bipolar disorder	24618891	MÃ¼hleisen	MIR2113 - EIF4EBP2P3	intron_variant	1e-08	1.12
rs630602	1	54728864	8.79588	others	Menarche (age at onset)	27182965	Pickrell JK	SSBP3	intron_variant	1e-08	0.026
rs6804842	3	25106437	9.22915	Anthropometric, T2D/Metabolic	Body mass index (joint analysis main effects and smoking interaction)	28443625	Justice AE	RARB	intron_variant	1e-08	NA
rs7141420	14	79899454	8.39794	Anthropometric, T2D/Metabolic	BMI in non-smokers	28443625	Justice AE	NRXN3	intron_variant	1e-08	0.0263
rs7141420	14	79899454	8.39794	Anthropometric, T2D/Metabolic	Body mass index in physically active individuals	28448500	Graff M	NRXN3	intron_variant	1e-08	0.0306
rs1229984	4	100239319	9.69897	Alcohol	Alcohol consumption	23743675	Kapoor M	ADH1B	missense_variant	2e-08	NA
rs1243180	10	21915619	9.92082	Cancers	Ovarian cancer	23535730	Pharoah PD	MLLT10	intron_variant	2e-08	1.1
rs1260326	2	27730940	20	Creatinine or Albumin traits	Serum albumin level	23022100	Franceschini N	GCKR	missense_variant	2e-08	0.027
rs1260326	2	27730940	20	NA	Cardiovascular disease risk factors	21943158	Middelberg RP	GCKR	missense_variant	2e-08	0.082
rs1361108	6	126767600	8.5376	others	Menarche (age at onset)	21102462	Elks CE	CENPW	intergenic_variant	2e-08	2.1
rs4548017	6	98399521	10.0458	GI, Diet & Lifestyle	Gut microbiota (bacterial taxa)	27694959	Bonder MJ	LOC101927314 - MIR2113	intron_variant	2e-08	5.65652
rs4548017	6	98399521	10.0458	GI, Diet & Lifestyle	Gut microbiota (bacterial taxa)	27694959	Bonder MJ	LOC101927314 - MIR2113	intron_variant	2e-08	5.65652
rs4548017	6	98399521	10.0458	GI, Diet & Lifestyle	Gut microbiota (bacterial taxa)	27694959	Bonder MJ	LOC101927314 - MIR2113	intron_variant	2e-08	5.65652
rs4665985	2	27753878	14.5229	Alcohol	Alcohol consumption (drinks per week)	28485404	Jorgenson E	GCKR - LOC100420668	intergenic_variant	2e-08	0.04
rs504963	19	49208865	13.4685	Autoimmune/Inflammation	Crohn's disease	20570966	McGovern DP	FUT2	3_prime_UTR_variant	2e-08	NA
rs780094	2	27741237	18.8239	others	Urate levels in obese individuals	25811787	Huffman JE	GCKR	intron_variant	2e-08	0.085
rs1121980	16	53809247	21.3372	Lipids	Triglycerides	24097068	Willer CJ	FTO	intron_variant	3e-08	0.021
rs11642841	16	53845487	12.2518	Anthropometric, T2D/Metabolic	Type 2 diabetes	20581827	Voight BF	FTO	intron_variant	3e-08	1.13
rs1487441	6	98553894	9.27572	Neurological	Bipolar disorder	27329760	Hou L	MIR2113 - EIF4EBP2P3	intron_variant	3e-08	1.12
rs1558902	16	53803574	22.0506	Anthropometric, T2D/Metabolic	Glycated hemoglobin levels	28898252	Wheeler E	FTO	intron_variant	3e-08	0.0103
rs17109256	14	79939993	9.23657	Anthropometric, T2D/Metabolic	Waist-hip ratio	25673412	Shungin D	NRXN3	intron_variant	3e-08	0.0227
rs34935520	14	61091401	8.25181	others	Optic disc area	28073927	Springelkamp H	LOC105378189	intergenic_variant	3e-08	0.023
rs4897182	6	126755642	8.4318	Anthropometric, T2D/Metabolic	Type 2 diabetes	28869590	Zhao W	CENPW	intergenic_variant	3e-08	0.047
rs6870983	5	87697533	8.65758	Anthropometric, T2D/Metabolic	Body mass index	28448500	Graff M	TMEM161B-AS1	intron_variant	3e-08	0.0248
rs7619139	3	25110415	10.0177	Anthropometric, T2D/Metabolic	Body mass index (joint analysis main effects and physical activity interaction)	28448500	Graff M	RARB	intron_variant	3e-08	NA
rs780094	2	27741237	18.8239	Lipids	Gondoic acid (20:1n-9) levels	28298293	Hu Y	GCKR	intron_variant	3e-08	0.002
rs9939609	16	53820527	19.7212	others	Menarche (age at onset)	21102462	Elks CE	FTO	intron_variant	3e-08	2.1
rs1121980	16	53809247	21.3372	Anthropometric, T2D/Metabolic	Body mass index	18454148	Loos RJ	FTO	intron_variant	4e-08	0.06
rs4548017	6	98399521	10.0458	GI, Diet & Lifestyle	Gut microbiota (bacterial taxa)	27694959	Bonder MJ	LOC101927314 - MIR2113	intron_variant	4e-08	5.48599
rs4548017	6	98399521	10.0458	GI, Diet & Lifestyle	Gut microbiota (bacterial taxa)	27694959	Bonder MJ	LOC101927314 - MIR2113	intron_variant	4e-08	5.48599
rs6870983	5	87697533	8.65758	Anthropometric, T2D/Metabolic	Body mass index	28448500	Graff M	TMEM161B-AS1	intron_variant	4e-08	0.0227
rs8050136	16	53816275	20.0969	NA	Body mass in chronic obstructive pulmonary disease	21037115	Wan ES	FTO	intron_variant	4e-08	NA
rs10146997	14	79945162	9.14267	Anthropometric, T2D/Metabolic	Waist circumference	19557197	Heard-Costa NL	NRXN3	intron_variant	5e-08	0.65
rs17817449	16	53813367	20.0269	Cancers	Breast cancer	27117709	Couch FJ	FTO	intron_variant	5e-08	1.05263
rs281379	19	49214274	12.6021	NA	Pubertal anthropometrics	23449627	Cousminer DL	MAMSTR	downstream_gene_variant	5e-08	0.07
rs602662	19	49206985	13.9586	Autoimmune/Inflammation	Pediatric autoimmune diseases	26301688	Li YR	FUT2, LOC105447645	missense_variant	5e-08	NA
rs1260326	2	27730940	20	others	Serum total protein level	23022100	Franceschini N	GCKR	missense_variant	6e-08	0.0179
rs2287019	19	46202172	15.6198	Anthropometric, T2D/Metabolic	Waist circumference	25673412	Shungin D	QPCTL	intron_variant	6e-08	0.0319
rs7141420	14	79899454	8.39794	Anthropometric, T2D/Metabolic	Body mass index	25673413	Locke AE	NRXN3	intron_variant	6e-08	0.022
rs9922619	16	53831771	16.5528	Anthropometric, T2D/Metabolic	Subcutaneous adipose tissue	22589738	Fox CS	FTO	intron_variant	6e-08	NA
rs1260326	2	27730940	20	GI, Diet & Lifestyle	Coffee consumption (cups per day)	25288136	Cornelis MC	GCKR	missense_variant	7e-08	0.04
rs780093	2	27742603	18.3468	others	Sex hormone-binding globulin levels	22829776	Coviello AD	GCKR	intron_variant	7e-08	0.026
rs9584850	13	99101426	9.22185	Neurological	Neuroticism	27089181	Okbay A	FARP1	3_prime_UTR_variant	7e-08	0.0212799
rs1260326	2	27730940	20	GI, Diet & Lifestyle	Gallstone disease	27094239	Joshi AD	GCKR	missense_variant	8e-08	1.12
rs9930333	16	53799977	21.2007	NA	Triglyceride levels	28334899	Spracklen CN	FTO	intron_variant	8e-08	0.0208
rs780094	2	27741237	18.8239	Lipids	Triglycerides	17463246	Saxena R	GCKR	intron_variant	9e-08	0.5
rs8043757	16	53813450	20.2924	Lipids	circulating leptin levels	26833098	KilpelÃ¤inen TO	FTO	intron_variant	9e-08	0.041
rs1121980	16	53809247	21.3372	Anthropometric, T2D/Metabolic	Obesity (early onset extreme)	18159244	Hinney A	FTO	intron_variant	1e-07	1.66
rs1243180	10	21915619	9.92082	Cancers	Ovarian cancer	23535730	Pharoah PD	MLLT10	intron_variant	1e-07	1.11
rs1260326	2	27730940	20	Autoimmune/Inflammation	Inflammatory bowel disease	28067908	de Lange KM	GCKR	missense_variant	1e-07	NA
rs2287019	19	46202172	15.6198	Anthropometric, T2D/Metabolic	Body mass index (joint analysis main effects and smoking interaction)	28443625	Justice AE	QPCTL	intron_variant	1e-07	NA
rs2470893	15	75019449	18.8539	GI, Diet & Lifestyle	Caffeine metabolism (plasma 1,3-dimethylxanthine (theophylline) level)	27702941	Cornelis MC	CYP1A1 - CYP1A2	upstream_gene_variant	1e-07	5.3
rs2472297	15	75027880	22.1739	GI, Diet & Lifestyle	Caffeine metabolism (plasma 1,3-dimethylxanthine (theophylline) level)	27702941	Cornelis MC	CYP1A1 - CYP1A2	intergenic_variant	1e-07	5.27
rs6804842	3	25106437	9.22915	Anthropometric, T2D/Metabolic	BMI (adjusted for smoking behaviour)	28443625	Justice AE	RARB	intron_variant	1e-07	0.0173
rs6870983	5	87697533	8.65758	Anthropometric, T2D/Metabolic	Body mass index (joint analysis main effects and physical activity interaction)	28448500	Graff M	TMEM161B-AS1	intron_variant	1e-07	NA
rs7531118	1	72837239	8.11351	Anthropometric, T2D/Metabolic	Waist circumference	25673412	Shungin D	LOC105378797	intergenic_variant	1e-07	0.0256
rs8050136	16	53816275	20.0969	Anthropometric, T2D/Metabolic	Body mass index	24348519	Namjou B	FTO	intron_variant	1e-07	5.26
rs1121980	16	53809247	21.3372	Lipids	HDL cholesterol levels	28334899	Spracklen CN	FTO	intron_variant	2e-07	0.0196
rs1260326	2	27730940	20	others	Glomerular filtration rate	27588450	Mahajan A	GCKR	missense_variant	2e-07	0.83
rs2287019	19	46202172	15.6198	Anthropometric, T2D/Metabolic	Waist-hip ratio	25673412	Shungin D	QPCTL	intron_variant	2e-07	0.034
rs35107470	15	74817689	17.0506	GI, Diet & Lifestyle	Caffeine metabolism (plasma 1,3-dimethylxanthine (theophylline) level)	27702941	Cornelis MC	LOC102723714 - ARID3B	intergenic_variant	2e-07	5.18
rs4897182	6	126755642	8.4318	Anthropometric, T2D/Metabolic	Type 2 diabetes	28869590	Zhao W	CENPW	intergenic_variant	2e-07	0.0513
rs492602	19	49206417	12.8861	GI, Diet & Lifestyle	Vitamin B levels in ischemic stroke	25147783	Keene KL	LOC105447645, FUT2	synonymous_variant	2e-07	0.143
rs7144011	14	79940383	9.18709	Anthropometric, T2D/Metabolic	Waist circumference	25673412	Shungin D	NRXN3	intron_variant	2e-07	0.0277
rs780094	2	27741237	18.8239	Anthropometric, T2D/Metabolic	Type 2 diabetes	28869590	Zhao W	GCKR	intron_variant	2e-07	0.0552
rs780094	2	27741237	18.8239	Alcohol	Alcohol consumption	27911795	Schumann G	GCKR	intron_variant	2e-07	0.0102
rs780094	2	27741237	18.8239	Alcohol	Alcohol consumption (drinks per week)	28485404	Jorgenson E	GCKR	intron_variant	2e-07	0.034
rs9939609	16	53820527	19.7212	Anthropometric, T2D/Metabolic	Type 2 diabetes	17554300	WTCCC	FTO	intron_variant	2e-07	1.34
rs11672660	19	46180184	16.9208	Anthropometric, T2D/Metabolic	Body mass index	28448500	Graff M	GIPR	intron_variant	3e-07	0.0312
rs17817449	16	53813367	20.0269	Cancers	Breast cancer (estrogen-receptor negative)	27117709	Couch FJ	FTO	intron_variant	3e-07	1.0989
rs838145	19	49248730	13.8239	NA	Dietary macronutrient intake	23636237	Tanaka T	IZUMO1	non_coding_transcript_exon_variant	3e-07	0.23
rs11672660	19	46180184	16.9208	Anthropometric, T2D/Metabolic	Body mass index (joint analysis main effects and physical activity interaction)	28448500	Graff M	GIPR	intron_variant	4e-07	NA
rs1229984	4	100239319	9.69897	Alcohol	Alcohol consumption (drinkers vs non-drinkers)	28485404	Jorgenson E	ADH1B	missense_variant	4e-07	1.39
rs601338	19	49206674	12.6198	others	Number of common colds	28928442	Tian C	FUT2, LOC105447645	stop_gained	4e-07	0.0198
rs62033406	16	53824226	18.8539	NA	Breast size	27182965	Pickrell JK	FTO	intron_variant	4e-07	0.062
rs6870983	5	87697533	8.65758	Anthropometric, T2D/Metabolic	Body mass index	25673413	Locke AE	TMEM161B-AS1	intron_variant	4e-07	0.018
rs10510554	3	25099776	9.29243	Anthropometric, T2D/Metabolic	Body mass index in physically inactive individuals	28448500	Graff M	RARB	intron_variant	5e-07	0.037
rs1229984	4	100239319	9.69897	others	Pulse pressure	28135244	Warren HR	ADH1B	missense_variant	5e-07	0.465
rs281377	19	49206603	8.46852	others	Yeast infection	28928442	Tian C	LOC105447645, FUT2	synonymous_variant	5e-07	0.0321
rs780094	2	27741237	18.8239	Anthropometric, T2D/Metabolic	Type 2 diabetes	22885922	Morris AP	GCKR	intron_variant	5e-07	1.06
rs780094	2	27741237	18.8239	Lipids	LDL cholesterol	18179892	Wallace C	GCKR	intron_variant	5e-07	NA
rs1490388	6	126835655	8.46852	Anthropometric, T2D/Metabolic	Height	18391951	Gudbjartsson DF	MIR588 - RNU6-200P	intergenic_variant	6e-07	4.8
rs17817449	16	53813367	20.0269	Cancers	Breast cancer	23535733	Garcia-Closas M	FTO	intron_variant	6e-07	1.09
rs7619139	3	25110415	10.0177	Anthropometric, T2D/Metabolic	Body mass index in physically active individuals	28448500	Graff M	RARB	intron_variant	6e-07	0.0438
rs780094	2	27741237	18.8239	Lipids	Gondoic acid (20:1n-9) levels	28298293	Hu Y	GCKR	intron_variant	6e-07	0.002
rs10761785	10	65318766	10.7212	Lipids	Plasma omega-6 polyunsaturated fatty acid levels (adrenic acid)	24823311	Guan W	REEP3	intron_variant	7e-07	0.01
rs4379723	10	64963449	10.3188	Haematological	Platelet count	23263863	Li J	JMJD1C	intron_variant	7e-07	5.4297
rs6870983	5	87697533	8.65758	Anthropometric, T2D/Metabolic	Body mass index in physically active individuals	28448500	Graff M	TMEM161B-AS1	intron_variant	7e-07	0.0246
rs838147	19	49246866	19.1675	NA	Dietary macronutrient intake	23636237	Tanaka T	IZUMO1	non_coding_transcript_exon_variant	7e-07	0.22
rs1260326	2	27730940	20	others	Urate levels in overweight individuals	25811787	Huffman JE	GCKR	missense_variant	8e-07	0.055
rs6804842	3	25106437	9.22915	Anthropometric, T2D/Metabolic	Body mass index	25673413	Locke AE	RARB	intron_variant	8e-07	0.02
rs6870983	5	87697533	8.65758	Anthropometric, T2D/Metabolic	Body mass index	25673413	Locke AE	TMEM161B-AS1	intron_variant	8e-07	0.017
rs6870983	5	87697533	8.65758	Anthropometric, T2D/Metabolic	Body mass index (joint analysis main effects and physical activity interaction)	28448500	Graff M	TMEM161B-AS1	intron_variant	8e-07	NA
rs780093	2	27742603	18.3468	Lipids	circulating leptin levels	26833098	KilpelÃ¤inen TO	GCKR	intron_variant	8e-07	0.033
rs7896518	10	65104500	8.65758	Neurological	Cognitive ability	29186694	Lam M	JMJD1C	intron_variant	8e-07	4.926
rs17109256	14	79939993	9.23657	Anthropometric, T2D/Metabolic	Waist-hip ratio	25673412	Shungin D	NRXN3	intron_variant	9e-07	0.0289
rs2287921	19	49228272	17.2441	GI, Diet & Lifestyle	Vitamin B levels in ischemic stroke	25147783	Keene KL	RASIP1	non_coding_transcript_exon_variant	9e-07	0.14
rs11672660	19	46180184	16.9208	Anthropometric, T2D/Metabolic	Hip circumference	25673412	Shungin D	GIPR	intron_variant	1e-06	0.0286
rs12975033	19	49249443	12.6021	Creatinine or Albumin traits	Glomerular filtration rate (creatinine)	26831199	Pattaro C	IZUMO1	intron_variant	1e-06	0.0039
rs1933721	6	98313223	9.67778	Neurological	Cognitive ability	29186694	Lam M	LOC101927314 - MIR2113	intron_variant	1e-06	4.893
rs2240466	7	72856269	9.0655	GI, Diet & Lifestyle	Caffeine consumption	21490707	Cornelis MC	BAZ1B	3_prime_UTR_variant	1e-06	0.1109
rs4418209	6	126819699	8.65758	others	Bone mineral density (paediatric, skull)	24945404	Kemp JP	MIR588 - RNU6-200P	intergenic_variant	1e-06	0.07
rs4665972	2	27598097	18.4318	NA	Breast size	22747683	Eriksson N	SNX17	intron_variant	1e-06	0.08
rs4665985	2	27753878	14.5229	Alcohol	Alcohol consumption (drinks per week)	28485404	Jorgenson E	GCKR - LOC100420668	intergenic_variant	1e-06	0.04
rs4858697	3	25116582	9.95861	Anthropometric, T2D/Metabolic	Body mass index in physically active individuals	28448500	Graff M	RARB	intron_variant	1e-06	0.0339
rs7531118	1	72837239	8.11351	Anthropometric, T2D/Metabolic	Body mass index in physically active individuals	28448500	Graff M	LOC105378797	intergenic_variant	1e-06	0.0255
rs780093	2	27742603	18.3468	Lipids	circulating leptin levels adjusted for BMI	26833098	KilpelÃ¤inen TO	GCKR	intron_variant	1e-06	0.025
rs7923609	10	65133822	10.5086	others	Educational attainment	25201988	Rietveld CA	JMJD1C	intron_variant	1e-06	0.021
rs10510554	3	25099776	9.29243	Anthropometric, T2D/Metabolic	Body mass index in physically active individuals	28448500	Graff M	RARB	intron_variant	2e-06	0.0193
rs10761731	10	65027610	9	Haematological	Platelet count	24026423	Shameer K	JMJD1C	intron_variant	2e-06	3.81
rs1800437	19	46181392	17.0315	Anthropometric, T2D/Metabolic	Body mass index (joint analysis main effects and physical activity interaction)	28448500	Graff M	GIPR	missense_variant	2e-06	NA
rs1800437	19	46181392	17.0315	Anthropometric, T2D/Metabolic	Body mass index	28448500	Graff M	GIPR	missense_variant	2e-06	0.0298
rs10761785	10	65318766	10.7212	Anthropometric, T2D/Metabolic	Body mass index	25673413	Locke AE	REEP3	intron_variant	3e-06	0.019
rs1229984	4	100239319	9.69897	Alcohol	Alcohol consumption (drinks per week)	28485404	Jorgenson E	ADH1B	missense_variant	3e-06	0.21
rs1260326	2	27730940	20	GI, Diet & Lifestyle	Caffeine metabolism (plasma 1,7-dimethylxanthine (paraxanthine) to 1,3,7-trimethylxanthine (caffeine) ratio)	27702941	Cornelis MC	GCKR	missense_variant	3e-06	4.69
rs2287019	19	46202172	15.6198	Anthropometric, T2D/Metabolic	BMI (adjusted for smoking behaviour)	28443625	Justice AE	QPCTL	intron_variant	3e-06	0.0302
rs2287921	19	49228272	17.2441	Neurological	Bipolar disorder	21926972	Sklar P	RASIP1	non_coding_transcript_exon_variant	3e-06	1.1
rs681343	19	49206462	12.7959	Autoimmune/Inflammation	Primary sclerosing cholangitis	27992413	Ji SG	FUT2, LOC105447645	synonymous_variant	3e-06	1.11
rs714052	7	72864869	9.14267	Lipids	Hypertriglyceridemia	20657596	Johansen CT	BAZ1B	intron_variant	3e-06	2.27
rs780093	2	27742603	18.3468	Lipids	Palmitic acid (16:0) levels	23362303	Wu JH	GCKR	intron_variant	3e-06	0.1261
rs10510554	3	25099776	9.29243	Anthropometric, T2D/Metabolic	Body mass index in physically active individuals	28448500	Graff M	RARB	intron_variant	4e-06	0.0192
rs1260326	2	27730940	20	others	Serum total protein level	23022100	Franceschini N	GCKR	missense_variant	4e-06	0.031
rs8044769	16	53839135	14.8539	others	Osteoarthritis	22763110	Zeggini E	FTO	intron_variant	4e-06	1.07
rs1260326	2	27730940	20	Lipids	Lipoprotein-associated phospholipase A2 activity and mass	23118302	Chu AY	GCKR	missense_variant	5e-06	0.0053
rs2287019	19	46202172	15.6198	Anthropometric, T2D/Metabolic	BMI in non-smokers	28443625	Justice AE	QPCTL	intron_variant	5e-06	0.0247
rs516246	19	49206172	12.7696	Autoimmune/Inflammation	Inflammatory bowel disease	28067908	de Lange KM	LOC105447645, FUT2	intron_variant	5e-06	NA
rs681343	19	49206462	12.7959	Cancers	Lung adenocarcinoma	28604730	McKay JD	FUT2, LOC105447645	synonymous_variant	5e-06	1.07647
rs6870983	5	87697533	8.65758	Anthropometric, T2D/Metabolic	Body mass index in physically active individuals	28448500	Graff M	TMEM161B-AS1	intron_variant	5e-06	0.0215
rs780093	2	27742603	18.3468	NA	Breast size	22747683	Eriksson N	GCKR	intron_variant	5e-06	0.072
rs1260326	2	27730940	20	others	Urate levels in overweight individuals	25811787	Huffman JE	GCKR	missense_variant	6e-06	0.065
rs6804842	3	25106437	9.22915	Anthropometric, T2D/Metabolic	Body mass index in physically inactive individuals	28448500	Graff M	RARB	intron_variant	6e-06	0.0363
rs780094	2	27741237	18.8239	others	Urate levels in overweight individuals	25811787	Huffman JE	GCKR	intron_variant	6e-06	0.05
rs8050136	16	53816275	20.0969	Anthropometric, T2D/Metabolic	Type 2 diabetes	23209189	Tabassum R	FTO	intron_variant	6e-06	1.16
rs9375225	6	98588754	9.284	others	QT interval (drug interaction)	23459443	Avery CL	MIR2113 - EIF4EBP2P3	intron_variant	6e-06	NA
rs780093	2	27742603	18.3468	GI, Diet & Lifestyle	Calcium levels	20705733	O'Seaghdha CM	GCKR	intron_variant	7e-06	0.02
rs8050136	16	53816275	20.0969	Anthropometric, T2D/Metabolic	Type 2 diabetes	18372903	Zeggini E	FTO	intron_variant	7e-06	1.15
rs11672660	19	46180184	16.9208	Anthropometric, T2D/Metabolic	Body mass index in physically active individuals	28448500	Graff M	GIPR	intron_variant	8e-06	0.0366
rs6804842	3	25106437	9.22915	Anthropometric, T2D/Metabolic	BMI in smokers	28443625	Justice AE	RARB	intron_variant	9e-06	0.0303
SNP: rs number;CHR: chromosome; BP: physical (base pair) position; LMMp10log: -log 10 P value for the BOLT LMM association effect estimate; MAPPED_GENE as presented in GWAS Catalog; P.VALUE: genome-wide association P-value for the SNP effect on the outcome in "DISEASE.TRAIT" column.
