# Supplementary material for: GWAS for urinary sodium and potassium excretion highlights pathways shared with cardiovascular traits
Source: Nat Commun. 2019 Aug 13;10:3653. doi: 10.1038/s41467-019-11451-y (PMC6692500; doi:10.1038/s41467-019-11451-y)
Supplement: Supplementary file 10 — Supplementary Dataset 10 [file 41467_2019_11451_MOESM10_ESM.xlsx]

## Sheet: Supplementary Data 10
Supplementary Data 10: Association of urinary potassium loci with other traits in GWAS Catalog (P < 5 × 10-8 ).
SNP	CHR	BP	LMMp10log	Category	DISEASE.TRAIT	PUBMEDID	FIRST.AUTHOR	MAPPED_GENE	CONTEXT	P.VALUE	OR.or.BETA
rs4973768	3	27416013	10.2291	Cancers	Breast cancer	29059683	Michailidou K	SLC4A7	3_prime_UTR_variant	5e-57	1.11
rs7619833	3	27509714	8.02228	Cancers	Breast cancer	29059683	Michailidou K	SLC4A7	intron_variant	3e-45	0.0874
rs4973768	3	27416013	10.2291	Cancers	Breast cancer	23535729	Michailidou K	SLC4A7	3_prime_UTR_variant	2e-30	1.1
rs4973768	3	27416013	10.2291	Cancers	Breast cancer	25751625	Michailidou K	SLC4A7	3_prime_UTR_variant	3e-30	1.1
rs4973768	3	27416013	10.2291	Cancers	Breast cancer	19330027	Ahmed S	SLC4A7	3_prime_UTR_variant	4e-23	1.11
rs653465	3	27343644	9.37675	Cancers	Breast cancer (early onset)	24493630	Ahsan H	NEK10	intron_variant	5e-12	1.18
rs4973768	3	27416013	10.2291	Cancers	Breast cancer	21263130	Fletcher O	SLC4A7	3_prime_UTR_variant	2e-08	1.14
rs1357245	3	27186602	9.48149	Cancers	Breast cancer	19330027	Ahmed S	NEK10	intron_variant	2e-07	1.06
rs4973768	3	27416013	10.2291	Cancers	Breast cancer	20453838	Turnbull C	SLC4A7	3_prime_UTR_variant	6e-07	1.16
rs2472297	15	75027880	14.3565	GI, Diet & Lifestyle	Coffee consumption (cups per day)	25288136	Cornelis MC	CYP1A1 - CYP1A2	intergenic_variant	2e-24	0.14
rs2472297	15	75027880	14.3565	GI, Diet & Lifestyle	Caffeine metabolism (plasma 1,7-dimethylxanthine (paraxanthine) to 1,3,7-trimethylxanthine (caffeine) ratio)	27702941	Cornelis MC	CYP1A1 - CYP1A2	intergenic_variant	9e-22	9.58
rs2472297	15	75027880	14.3565	GI, Diet & Lifestyle	Caffeine metabolism (plasma 1,3,7-trimethylxanthine (caffeine) level)	27702941	Cornelis MC	CYP1A1 - CYP1A2	intergenic_variant	1e-20	9.34
rs4410790	7	17284577	11.7212	GI, Diet & Lifestyle	Caffeine consumption	21490707	Cornelis MC	LOC101927609	intergenic_variant	2e-19	0.15
rs2470893	15	75019449	11.2757	GI, Diet & Lifestyle	Coffee consumption	25288136	Cornelis MC	CYP1A1 - CYP1A2	upstream_gene_variant	5e-19	0.2
rs2470893	15	75019449	11.2757	GI, Diet & Lifestyle	Caffeine metabolism (plasma 1,3,7-trimethylxanthine (caffeine) level)	27702941	Cornelis MC	CYP1A1 - CYP1A2	upstream_gene_variant	5e-18	8.65
rs4410790	7	17284577	11.7212	GI, Diet & Lifestyle	Coffee consumption (cups per day)	25288136	Cornelis MC	LOC101927609	intergenic_variant	3e-17	0.1
rs6968554	7	17287106	11.4949	GI, Diet & Lifestyle	Caffeine metabolism (plasma 1,7-dimethylxanthine (paraxanthine) to 1,3,7-trimethylxanthine (caffeine) ratio)	27702941	Cornelis MC	LOC101927609	intergenic_variant	3e-17	8.44
rs35107470	15	74817689	10.3098	GI, Diet & Lifestyle	Caffeine metabolism (plasma 1,3,7-trimethylxanthine (caffeine) level)	27702941	Cornelis MC	LOC102723714 - ARID3B	intergenic_variant	2e-16	8.2
rs4410790	7	17284577	11.7212	GI, Diet & Lifestyle	Caffeine metabolism (plasma 1,7-dimethylxanthine (paraxanthine) to 1,3,7-trimethylxanthine (caffeine) ratio)	27702941	Cornelis MC	LOC101927609	intergenic_variant	7e-16	8.07
rs2470893	15	75019449	11.2757	GI, Diet & Lifestyle	Caffeine metabolism (plasma 1,7-dimethylxanthine (paraxanthine) to 1,3,7-trimethylxanthine (caffeine) ratio)	27702941	Cornelis MC	CYP1A1 - CYP1A2	upstream_gene_variant	4e-15	7.85
rs6968554	7	17287106	11.4949	GI, Diet & Lifestyle	Coffee consumption	25288136	Cornelis MC	LOC101927609	intergenic_variant	7e-15	0.2
rs35107470	15	74817689	10.3098	GI, Diet & Lifestyle	Caffeine metabolism (plasma 1,7-dimethylxanthine (paraxanthine) to 1,3,7-trimethylxanthine (caffeine) ratio)	27702941	Cornelis MC	LOC102723714 - ARID3B	intergenic_variant	3e-14	7.58
rs2470893	15	75019449	11.2757	GI, Diet & Lifestyle	Caffeine consumption	21490707	Cornelis MC	CYP1A1 - CYP1A2	upstream_gene_variant	5e-14	0.12
rs2472297	15	75027880	14.3565	GI, Diet & Lifestyle	Coffee consumption	21357676	Sulem P	CYP1A1 - CYP1A2	intergenic_variant	5e-14	0.31
rs4410790	7	17284577	11.7212	GI, Diet & Lifestyle	Caffeine metabolism (plasma 1,3,7-trimethylxanthine (caffeine) level)	27702941	Cornelis MC	LOC101927609	intergenic_variant	2e-13	7.36
rs6968554	7	17287106	11.4949	GI, Diet & Lifestyle	Caffeine metabolism (plasma 1,3,7-trimethylxanthine (caffeine) level)	27702941	Cornelis MC	LOC101927609	intergenic_variant	5e-13	7.22
rs2470893	15	75019449	11.2757	GI, Diet & Lifestyle	Coffee consumption	21876539	Amin N	CYP1A1 - CYP1A2	upstream_gene_variant	2e-11	0.0675
rs6968865	7	17287269	11.6021	GI, Diet & Lifestyle	Coffee consumption	21357676	Sulem P	LOC101927609	intergenic_variant	2e-11	0.26
rs10275488	7	17303778	10.0969	GI, Diet & Lifestyle	Caffeine metabolism (plasma 1,7-dimethylxanthine (paraxanthine) to 1,3,7-trimethylxanthine (caffeine) ratio)	27702941	Cornelis MC	LOC101927609	intergenic_variant	2e-09	5.98
rs10275488	7	17303778	10.0969	GI, Diet & Lifestyle	Caffeine metabolism (plasma 1,3,7-trimethylxanthine (caffeine) level)	27702941	Cornelis MC	LOC101927609	intergenic_variant	5e-09	5.85
rs2470893	15	75019449	11.2757	GI, Diet & Lifestyle	Caffeine metabolism (plasma 1,3-dimethylxanthine (theophylline) level)	27702941	Cornelis MC	CYP1A1 - CYP1A2	upstream_gene_variant	1e-07	5.3
rs2472297	15	75027880	14.3565	GI, Diet & Lifestyle	Caffeine metabolism (plasma 1,3-dimethylxanthine (theophylline) level)	27702941	Cornelis MC	CYP1A1 - CYP1A2	intergenic_variant	1e-07	5.27
rs35107470	15	74817689	10.3098	GI, Diet & Lifestyle	Caffeine metabolism (plasma 1,3-dimethylxanthine (theophylline) level)	27702941	Cornelis MC	LOC102723714 - ARID3B	intergenic_variant	2e-07	5.18
rs2470893	15	75019449	11.2757	Haematological	Platelet distribution width	27863252	Astle WJ	CYP1A1 - CYP1A2	upstream_gene_variant	4e-10	0.0238806
rs6968554	7	17287106	11.4949	NA	Blood metabolite levels	24816252	Shin SY	LOC101927609	intergenic_variant	9e-14	0.064
rs4957048	5	583442	9.50864	NA	Ulcerative colitis	20228799	McGovern DP	LOC105374607 - LOC105374608	intergenic_variant	1e-09	1.11
rs481519	3	27327214	9.74473	NA	Cancer (pleiotropy)	27197191	Fehringer G	NEK10	intron_variant	2e-09	NA
rs11739663	5	594083	9.22915	NA	Ulcerative colitis	23128233	Jostins L	LOC105374607 - LOC105374608	intergenic_variant	2e-08	1.071
rs11739663	5	594083	9.22915	NA	Ulcerative colitis	21297633	Anderson CA	LOC105374607 - LOC105374608	intergenic_variant	3e-08	1.15
rs4957048	5	583442	9.50864	NA	Ulcerative colitis	28067908	de Lange KM	LOC105374607 - LOC105374608	intergenic_variant	2e-07	NA
rs11739663	5	594083	9.22915	NA	Ulcerative colitis	26192919	Liu JZ	LOC105374607 - LOC105374608	intergenic_variant	2e-06	1.07851
rs784257	18	53397199	8.09151	others	Fuchs's corneal dystrophy	28358029	Afshari NA	LOC105372130	intron_variant	3e-200	4.94
SNP: rs number;CHR: chromosome; BP: physical (base pair) position; LMMp10log: -log 10 P value for the BOLT LMM association effect estimate; MAPPED_GENE as presented in GWAS Catalog; P.VALUE: genome-wide association P-value for the SNP effect on the outcome in "DISEASE.TRAIT" column.
