# Supplementary material for: GWAS for urinary sodium and potassium excretion highlights pathways shared with cardiovascular traits
Source: Nat Commun. 2019 Aug 13;10:3653. doi: 10.1038/s41467-019-11451-y (PMC6692500; doi:10.1038/s41467-019-11451-y)
Supplement: Supplementary file 11 — Supplementary Dataset 11 [file 41467_2019_11451_MOESM11_ESM.xlsx]

## Sheet: Supplementary Data 11
Supplementary Data 11: Phenotypes associated with urinary sodium loci within UK Biobank using GeneAtlas at P<1*10-6.
SNP	Associated phenotypes ordered by P vlaue	Strongest phenotype	P.valueStrongest phenotype
rs10136360	Weight, Weight, Whole body fat mass, Trunk fat mass, Leg fat mass (right), Leg fat mass (left), Body mass index (BMI), Arm fat mass (right), Arm fat mass (left), Body mass index (BMI), Basal metabolic rate, Waist circumference, Hip circumference, Leg fat percentage (right), Body fat percentage, Leg fat percentage (left), Leg fat-free mass (left), Leg predicted mass (left), Whole body fat-free mas…	Weight	5.9619e-39
rs1260326	Platelet count, Monocyte percentage, Platelet crit, Trunk predicted mass, Trunk fat-free mass, Alcohol intake frequency, Whole body water mass, Whole body fat-free mass, White blood cell (leukocyte) count, Neutrophill count, Arm predicted mass (right), Arm fat-free mass (right), Arm fat-free mass (left), high cholesterol, Basal metabolic rate, Arm predicted mass (left), Leg predicted mass (right)…	Platelet count	8.1983e-104
rs13163314		Reticulocyte count	1.4296e-06
rs1437971	Waist circumference, Time spent watching television (TV), Body fat percentage, Leg fat percentage (right), Body mass index (BMI), Leg fat percentage (left), Whole body fat mass, Trunk fat mass, Body mass index (BMI), Trunk fat percentage, Arm fat percentage (left), Arm fat percentage (right), Leg fat mass (right), Leg fat mass (left), Weight, Weight, Waist circumference / Hip circumference, Arm f…	Waist circumference	1.1141e-15
rs1513481	Cereal intake	Cereal intake	1.9935e-08
rs1516187		Impedance of arm (right)	1.0634e-06
rs1562308	White blood cell (leukocyte) count, Immature reticulocyte fraction, Neutrophill count, Eosinophill count, Mean sphered cell volume, Water intake, Monocyte count, Platelet crit, Mean reticulocyte volume	White blood cell (leukocyte) count	5.9197e-21
rs16850592	Leg fat percentage (left), Leg fat percentage (right), Body mass index (BMI), Body mass index (BMI), Waist circumference, Leg fat mass (left), Waist circumference / Hip circumference, Leg fat mass (right), Body fat percentage	Leg fat percentage (left)	6.7287e-10
rs17123039		Impedance of arm (right)	9.6739e-05
rs17635778		hypertension	6.7981e-05
rs1036336	Impedance of arm (right), Impedance of arm (left), Impedance of whole body	Impedance of arm (right)	1.0818e-09
rs1957111	Leg fat percentage (right), Leg fat percentage (left), Body fat percentage, Arm fat percentage (left), Arm fat percentage (right), Trunk fat percentage, Trunk fat mass, Time spent watching television (TV), Whole body fat mass, Leg fat mass (right), Body mass index (BMI), Waist circumference, Leg fat mass (left), Body mass index (BMI)	Leg fat percentage (right)	3.897e-10
rs1996928	Waist circumference, Waist circumference / Hip circumference, Weight, Leg fat mass (right), Leg fat mass (left), Body mass index (BMI), Weight, Body mass index (BMI), Arm predicted mass (left), Leg fat percentage (right), Leg fat percentage (left), Arm fat-free mass (left), Basal metabolic rate, Whole body fat mass, Arm predicted mass (right), Whole body fat-free mass, Arm fat-free mass (right), …	Waist circumference	4.8661e-17
rs2021807	Haematocrit percentage, Red blood cell (erythrocyte) count, Haemoglobin concentration, Salt added to food, Processed meat intake, Sitting height, High light scatter reticulocyte percentage, Standing height	Haematocrit percentage	1.3073e-27
rs2393831	Salt added to food	Salt added to food	9.3784e-16
rs2422137	Comparative body size at age 10, Body mass index (BMI), Body mass index (BMI), Leg fat percentage (left), Leg fat percentage (right), Leg fat mass (left), Leg fat mass (right), Weight, Fresh fruit intake, Hip circumference, Weight, Whole body fat mass, Arm fat-free mass (left), Arm predicted mass (left), Arm fat-free mass (right), Arm predicted mass (right), Arm fat mass (left), Arm fat mass (rig…	Comparative body size at age 10	2.1625e-18
rs2472297	Coffee intake, Tea intake, Water intake, Hot drink temperature, Cereal intake, Platelet distribution width, Platelet count, Impedance of arm (right), Mean platelet (thrombocyte) volume, Leg fat percentage (left), Leg fat percentage (right), Body mass index (BMI), Body mass index (BMI), Impedance of arm (left), Fresh fruit intake, Standing height, Leg fat mass (right), Leg fat mass (left), Waist c…	Coffee intake	4.642e-211
rs2504671	Fresh fruit intake, Comparative body size at age 10, Leg fat percentage (left), Body mass index (BMI), Leg fat percentage (right), Body fat percentage, Body mass index (BMI), Arm fat percentage (left), Arm fat percentage (right), Whole body fat mass, Leg fat mass (left), Cereal intake, Trunk fat mass, Leg fat mass (right), Tea intake, Arm fat mass (left), Arm fat mass (right), Trunk fat percentag…	Fresh fruit intake	1.1657e-23
rs2761589	Red blood cell (erythrocyte) count, Haematocrit percentage, Haemoglobin concentration, Impedance of arm (left), Impedance of arm (right), Processed meat intake, Salt added to food, Impedance of whole body, Standing height	Red blood cell (erythrocyte) count	5.965e-16
rs2945091	Impedance of arm (right), Impedance of whole body, Impedance of leg (right), Impedance of arm (left), Sleep duration, Impedance of leg (left), Variation in diet	Impedance of arm (right)	7.7394e-11
rs2968426	Whole body fat mass, Trunk fat mass, Body fat percentage, Weight, Weight, Arm fat mass (right), Trunk fat percentage, Comparative body size at age 10, Leg fat mass (left), Leg fat mass (right), Arm fat percentage (right), Platelet distribution width, Arm fat mass (left), Leg fat percentage (left), Arm fat percentage (left), Body mass index (BMI), Body mass index (BMI), Waist circumference, Leg fa…	Whole body fat mass	7.5063e-10
rs10457480	Standing height, Sitting height, Comparative height size at age 10, Trunk fat-free mass, Trunk predicted mass, Whole body fat-free mass, Whole body water mass, Arm predicted mass (left), Basal metabolic rate, Arm fat-free mass (right), Arm fat-free mass (left), Arm predicted mass (right), Haematocrit percentage, Waist circumference / Hip circumference, Leg fat-free mass (right), Leg predicted mas…	Standing height	7.6518e-68
rs33951980	Monocyte percentage, Impedance of arm (right), Impedance of arm (left), Mean sphered cell volume, High light scatter reticulocyte count, High light scatter reticulocyte percentage, Reticulocyte percentage, Impedance of whole body, Sitting height, Reticulocyte count, Coffee intake, Trunk predicted mass, Trunk fat-free mass, Arm fat-free mass (right), Arm predicted mass (right), Whole body water ma…	Monocyte percentage	7.5644e-43
rs34452566	Weight, Weight, Basal metabolic rate, Whole body fat-free mass, Whole body water mass, Trunk fat-free mass, Trunk predicted mass	Weight	4.7504e-08
rs34783010	Body mass index (BMI), Body mass index (BMI), Whole body fat mass, Leg fat mass (left), Leg fat mass (right), Arm fat mass (left), Weight, Arm fat mass (right), Weight, Trunk fat mass, Waist circumference, Leg fat percentage (left), Leg fat percentage (right), Body fat percentage, Arm fat percentage (left), Arm fat percentage (right), Hip circumference, Trunk fat percentage, Basal metabolic rate,…	Body mass index (BMI)	5.2469e-48
rs40465	Comparative body size at age 10, Leg fat percentage (right), Leg fat percentage (left), Body fat percentage, Waist circumference, Trunk fat percentage, Trunk fat mass, Waist circumference / Hip circumference, Hand grip strength (right), Salt added to food, Whole body fat mass, Leg fat mass (right), Hand grip strength (left), Leg fat mass (left), Arm fat percentage (right), Number of self-reported…	Comparative body size at age 10	1.3557e-11
rs4410790	Coffee intake, Tea intake, Water intake, Hot drink temperature, Ease of skin tanning, Cereal intake, Skin colour	Coffee intake	7.6425e-175
rs4442732	Standing height, Sitting height, Trunk fat-free mass, Trunk predicted mass, Whole body fat-free mass, Whole body water mass, Basal metabolic rate, Arm fat-free mass (left), Arm predicted mass (left), Arm predicted mass (right), Arm fat-free mass (right), Leg predicted mass (right), Leg fat-free mass (right), Leg fat-free mass (left), Leg predicted mass (left), Weight, Weight, Comparative height s…	Standing height	2.7796e-106
rs4788415	Mean corpuscular volume, Red blood cell (erythrocyte) count, Mean corpuscular haemoglobin	Mean corpuscular volume	9.1322e-09
rs55807911	high cholesterol, Platelet count, E78 Disorders of lipoprotein metabolism and other lipidaemias, Number of self-reported non-cancer illnesses, Platelet crit, Alcohol intake frequency., High light scatter reticulocyte percentage	high cholesterol	5.4617e-10
rs5760425	Tea intake, Eosinophill count, Eosinophill percentage	Tea intake	3.1233e-34
rs643428	Comparative body size at age 10, Arm fat percentage (right), Body fat percentage, Arm fat percentage (left), Trunk fat percentage, Whole body fat mass, Weight, Weight, Trunk fat mass, Waist circumference, Leg fat mass (left), Body mass index (BMI), Leg fat percentage (left), Monocyte count, Body mass index (BMI), Arm fat mass (right)	Comparative body size at age 10	1.5072e-12
rs11584700	Oily fish intake, Platelet crit, Fresh fruit intake, Platelet count, Time spent watching television (TV), Hand grip strength (left), Platelet distribution width	Oily fish intake	2.8435e-10
rs7072776	Leg fat percentage (left), Leg fat percentage (right), Leg fat mass (left), Leg fat mass (right), Fresh fruit intake, Waist circumference, Whole body fat mass, Trunk fat mass, Body fat percentage, Body mass index (BMI), Body mass index (BMI), Oily fish intake, Hip circumference, Trunk fat percentage, Weight, Weight, Arm fat mass (right), Arm fat mass (left), Time spent watching television (TV), A…	Leg fat percentage (left)	5.6945e-25
rs7140993	Leg fat percentage (right), Body fat percentage, Leg fat percentage (left)	Leg fat percentage (right)	1.098e-07
rs72634682	Impedance of arm (left), Impedance of arm (right), Impedance of whole body	Impedance of arm (left)	6.2985e-09
rs7334078	Body fat percentage, Leg fat percentage (right), Trunk fat percentage, Leg fat percentage (left), Arm fat percentage (left), Arm fat percentage (right), Trunk fat mass, Whole body fat mass, Body mass index (BMI), Leg fat mass (right), Body mass index (BMI), Leg fat mass (left), Arm fat mass (right), Waist circumference, Mean platelet (thrombocyte) volume, Arm fat mass (left)	Body fat percentage	3.037e-15
rs7442885	Weight, Weight, Arm predicted mass (left), Arm fat-free mass (right), Arm predicted mass (right), Arm fat-free mass (left), Basal metabolic rate, Leg fat mass (left), Leg fat mass (right), Whole body water mass, Whole body fat-free mass, Body mass index (BMI), Waist circumference, Body mass index (BMI), Trunk fat-free mass, Trunk predicted mass, Whole body fat mass, Arm fat mass (left), Arm fat m…	Weight	1.1678e-29
rs7619139	Leg fat-free mass (right), Leg predicted mass (right), Leg fat-free mass (left), Leg predicted mass (left), Basal metabolic rate, Whole body fat-free mass, Whole body water mass, Weight, Weight, Trunk predicted mass, Trunk fat-free mass, Impedance of leg (right), Arm fat-free mass (left), Arm predicted mass (left), Arm fat-free mass (right), Impedance of leg (left), Arm predicted mass (right), Ce…	Leg fat-free mass (right)	1.6795e-30
rs784257	H18 Other disorders of cornea, Impedance of whole body, Impedance of arm (left), Usual walking pace, Impedance of arm (right), White blood cell (leukocyte) count, Impedance of leg (left), Waist circumference, Impedance of leg (right), Hand grip strength (right), Monocyte count, Body mass index (BMI), Body mass index (BMI), Waist circumference / Hip circumference, Leg fat-free mass (left), Hand gr…	H18 Other disorders of cornea	1.7211e-20
rs7924036	Mean platelet (thrombocyte) volume, Platelet count, White blood cell (leukocyte) count, Neutrophill count, Platelet distribution width, Standing height, Monocyte percentage, Impedance of arm (left), Impedance of arm (right), Lymphocyte count, Neutrophill percentage, Basophill percentage, Waist circumference / Hip circumference, Usual walking pace, Impedance of whole body, Mean reticulocyte volume…	Mean platelet (thrombocyte) volume	1e-300
rs816366		Trunk fat percentage	0.000121
rs838133	Mean platelet (thrombocyte) volume, Cereal intake, Non-oily fish intake, Oily fish intake, Processed meat intake, high cholesterol, Platelet count, Fresh fruit intake, Cooked vegetable intake, K80-K87 Disorders of gallbladder, biliary tract and pancreas, K80 Cholelithiasis, Bread intake, Pork intake, Sitting height, Lamb/mutton intake, Alcohol intake frequency., Hip circumference, Standing height…	Mean platelet (thrombocyte) volume	1.4861e-39
rs11642015	Body mass index (BMI), Body mass index (BMI), Weight, Weight, Leg fat-free mass (left), Leg predicted mass (left), Arm fat mass (right), Arm fat mass (left), Leg predicted mass (right), Leg fat-free mass (right), Basal metabolic rate, Whole body fat mass, Leg fat mass (left), Leg fat mass (right), Waist circumference, Comparative body size at age 10, Impedance of leg (left), Hip circumference, Wh…	Body mass index (BMI)	1e-300
rs9387963	Leg fat percentage (right), Leg fat percentage (left), Body fat percentage, Trunk fat percentage, Cereal intake, Leg fat mass (left), Leg fat mass (right), Time spent watching television (TV), Whole body fat mass, Body mass index (BMI), Body mass index (BMI), Trunk fat mass, Arm fat percentage (left), Arm fat percentage (right), High light scatter reticulocyte count, Number of days/week walked 10…	Leg fat percentage (right)	3.7825e-24
rs9537160	Oily fish intake, Lamb/mutton intake	Oily fish intake	2.9979e-19
rs11646118	Mean corpuscular haemoglobin, Red blood cell (erythrocyte) count, Mean corpuscular volume, Mean sphered cell volume, Standing height, Mean reticulocyte volume	Mean corpuscular haemoglobin	4.7403e-12
rs117287096		Current tobacco smoking	1.4746e-06
rs1229984	Alcohol intake frequency., gout, F10 Mental and behavioural disorders due to use of alcohol, Alcohol drinker status, Mean corpuscular haemoglobin, Mean corpuscular volume, Leg fat percentage (right), Leg fat percentage (left), hypertension, Body mass index (BMI), Leg fat mass (right), Whole body fat mass, Body fat percentage, Body mass index (BMI), Red blood cell (erythrocyte) count, Leg fat mass…	Alcohol intake frequency.	6.1025e-177
rs12581220	Comparative height size at age 10	Comparative height size at age 10	5.0217e-07
