# Supplementary material for: GWAS for urinary sodium and potassium excretion highlights pathways shared with cardiovascular traits
Source: Nat Commun. 2019 Aug 13;10:3653. doi: 10.1038/s41467-019-11451-y (PMC6692500; doi:10.1038/s41467-019-11451-y)
Supplement: Supplementary file 12 — Supplementary Dataset 12 [file 41467_2019_11451_MOESM12_ESM.xlsx]

## Sheet: Supplementary Data 12
Supplementary Data 12: Phenotypes associated with urinary potassium loci within UK Biobank at P<1*10-6.
SNP	Associated phenotypes ordered by P vlaue	Strongest phenotype	P.valueStrongest phenotype
rs10854166	Monocyte percentage, Monocyte count, Neutrophill percentage, Mean corpuscular volume, Mean corpuscular haemoglobin	Monocyte percentage	1.2699e-33
rs6467447	Ease of skin tanning	Ease of skin tanning	4.271e-08
rs72704791		K44 Diaphragmatic hernia	1.1196e-06
rs7319172	Body mass index (BMI), Waist circumference, Body mass index (BMI)	Body mass index (BMI)	1.7401e-07
rs784257	H18 Other disorders of cornea, Impedance of whole body, Impedance of arm (left), Usual walking pace, Impedance of arm (right), White blood cell (leukocyte) count, Impedance of leg (left), Waist circumference, Impedance of leg (right), Hand grip strength (right), Monocyte count, Body mass index (BMI), Body mass index (BMI), Waist circumference / Hip circumference, Leg fat-free mass (left), Hand gr…	H18 Other disorders of cornea	1.7211e-20
rs12944041	Haematocrit percentage, Red blood cell (erythrocyte) count, Monocyte count, Haemoglobin concentration, White blood cell (leukocyte) count	Haematocrit percentage	5.8947e-13
rs13143189		kidney stone/ureter stone/bladder stone	0.00012672
rs2122127	Standing height, Arm fat-free mass (right), Arm predicted mass (right), Trunk fat-free mass, Arm predicted mass (left), Trunk predicted mass, Arm fat-free mass (left), Whole body fat-free mass, Whole body water mass, Impedance of arm (right), Basal metabolic rate, Sitting height, I83 Varicose veins of lower extremities, Leg predicted mass (left), Leg predicted mass (right), Leg fat-free mass (rig…	Standing height	1.4086e-15
rs2472297	Coffee intake, Tea intake, Water intake, Hot drink temperature, Cereal intake, Platelet distribution width, Platelet count, Impedance of arm (right), Mean platelet (thrombocyte) volume, Leg fat percentage (left), Leg fat percentage (right), Body mass index (BMI), Body mass index (BMI), Impedance of arm (left), Fresh fruit intake, Standing height, Leg fat mass (right), Leg fat mass (left), Waist c…	Coffee intake	4.642e-211
rs254023	Waist circumference, Trunk fat mass, Whole body fat mass, Body fat percentage, Body mass index (BMI), Trunk fat percentage, Weight, Leg fat mass (right), Body mass index (BMI), Hand grip strength (right), Leg fat percentage (right), Weight, Waist circumference / Hip circumference, Leg fat mass (left), Leg fat percentage (left), Arm fat mass (right), Arm fat percentage (right), Arm fat percentage …	Waist circumference	1.244e-13
rs4410790	Coffee intake, Tea intake, Water intake, Hot drink temperature, Ease of skin tanning, Cereal intake, Skin colour	Coffee intake	7.6425e-175
rs4973766	C50-C50 Malignant neoplasm of breast, C50 Malignant neoplasm of breast, Body fat percentage, Leg fat percentage (left), Arm fat percentage (right), Trunk fat percentage, Leg fat percentage (right), Arm fat percentage (left)	C50-C50 Malignant neoplasm of breast	1.5742e-08
rs61375854		Basophill count	0.00048807
