# Supplementary material for: GWAS for urinary sodium and potassium excretion highlights pathways shared with cardiovascular traits
Source: Nat Commun. 2019 Aug 13;10:3653. doi: 10.1038/s41467-019-11451-y (PMC6692500; doi:10.1038/s41467-019-11451-y)
Supplement: Supplementary file 13 — Supplementary Dataset 13 [file 41467_2019_11451_MOESM13_ESM.xlsx]

## Sheet: Supplementary Data 13
Supplementary Data 13: LD score regression between urinary sodium and other traits.
Trait	PMID	Category	ethnicity	rg	se	z	p	h2_obs	h2_obs_se	h2_int	h2_int_se	gcov_int	gcov_int_se
Creatinine (enzymatic) in urine	0	ukbb	European	0.6914	0.0173	40.0491	0	0.066	0.0029	1.0187	0.0088	0.439	0.0073
Sodium in urine	0	ukbb	European	0.9939	0.0034	290.799	0	0.0713	0.0032	1.0287	0.0099	0.8641	0.0096
Qualifications: College or University degree	0	ukbb	European	-0.4469	0.0191	-23.3476	1.4581e-120	0.1683	0.0053	1.1166	0.0134	-0.0706	0.0076
Years of schooling 2016	27225129	education	European	-0.418	0.0199	-20.9605	1.5e-97	0.1269	0.0044	0.9274	0.0101	-0.0271	0.0062
Potassium in urine	0	ukbb	European	0.5159	0.0252	20.4917	2.5511e-93	0.0427	0.0023	1.0172	0.0087	0.3747	0.0063
Time spent watching television (TV)	0	ukbb	European	0.4243	0.0221	19.2043	3.4095e-82	0.0993	0.004	1.0562	0.0107	0.0354	0.0071
Qualifications: None of the above	0	ukbb	European	0.4024	0.0224	17.9549	4.395e-72	0.0975	0.0039	1.0665	0.0115	0.0525	0.0067
Leg fat percentage (left)	0	ukbb	European	0.385	0.0234	16.449	8.5237e-61	0.208	0.0062	1.0846	0.0162	0.1603	0.0095
Leg fat percentage (right)	0	ukbb	European	0.3808	0.0233	16.3132	7.9476e-60	0.208	0.0063	1.0819	0.0166	0.1599	0.0095
Body fat percentage	0	ukbb	European	0.3582	0.023	15.6001	7.2655e-55	0.2165	0.0068	1.0837	0.0174	0.1402	0.0094
Qualifications: A levels/AS levels or equivalent	0	ukbb	European	-0.3748	0.0244	-15.3857	2.0423e-53	0.0966	0.0036	1.0536	0.0117	-0.0639	0.0073
Waist circumference	0	ukbb	European	0.3421	0.0226	15.1163	1.2649e-51	0.2003	0.0071	1.0623	0.0167	0.1619	0.0088
Trunk fat percentage	0	ukbb	European	0.3408	0.0228	14.9409	1.785e-50	0.2064	0.0068	1.085	0.0175	0.1196	0.0092
College completion	23722424	education	European	-0.46	0.0309	-14.8638	5.66e-50	0.0793	0.0057	1.021	0.0088	0.0081	0.0067
Leg fat mass (right)	0	ukbb	European	0.3443	0.0232	14.8112	1.2407e-49	0.2304	0.0077	1.0713	0.0174	0.1721	0.0092
Leg fat mass (left)	0	ukbb	European	0.3454	0.0234	14.7846	1.8427e-49	0.2314	0.0077	1.0719	0.0173	0.1719	0.0092
Job involves mainly walking or standing	0	ukbb	European	0.3881	0.0263	14.7728	2.1928e-49	0.08	0.0045	1.0309	0.0091	0.062	0.0068
Job involves heavy manual or physical work	0	ukbb	European	0.3815	0.026	14.6469	1.4106e-48	0.087	0.0045	1.0362	0.0089	0.0659	0.0072
Whole body fat mass	0	ukbb	European	0.3317	0.023	14.3889	6.0742e-47	0.2342	0.0077	1.0752	0.0178	0.1558	0.0091
Qualifications: Other professional qualifications eg: nursing_ teaching	0	ukbb	European	-0.3853	0.0273	-14.1265	2.6077e-45	0.0471	0.0026	1.0264	0.0091	-0.04	0.0063
Trunk fat mass	0	ukbb	European	0.3201	0.0227	14.089	4.4357e-45	0.231	0.0076	1.0798	0.0182	0.1398	0.0089
Years of schooling (proxy cognitive performance)	25201988	education	European	-0.4271	0.0304	-14.0323	9.89e-45	0.1068	0.0074	1.0268	0.0092	0.0001	0.0075
Arm fat percentage (right)	0	ukbb	European	0.3319	0.0242	13.6972	1.0555e-42	0.2157	0.007	1.0795	0.0174	0.1428	0.0092
Arm fat percentage (left)	0	ukbb	European	0.3299	0.0241	13.6929	1.1188e-42	0.2192	0.0072	1.0743	0.0177	0.1461	0.0095
Years of schooling 2013	23722424	education	European	-0.441	0.0323	-13.6451	2.16e-42	0.0842	0.0063	1.0191	0.009	0.0062	0.0071
Arm fat mass (right)	0	ukbb	European	0.3196	0.0239	13.3891	7.005e-41	0.2308	0.0079	1.0716	0.0173	0.1606	0.009
Arm fat mass (left)	0	ukbb	European	0.3186	0.0238	13.375	8.4644e-41	0.2316	0.0079	1.0682	0.0173	0.1606	0.009
Average weekly red wine intake	0	ukbb	European	-0.3773	0.0286	-13.206	8.1e-40	0.0564	0.0034	1.0134	0.0074	-0.0325	0.0067
Body mass index (BMI)	0	ukbb	European	0.3225	0.0245	13.1747	1.2263e-39	0.2473	0.0083	1.074	0.0183	0.1877	0.0099
Overall health rating	0	ukbb	European	0.3347	0.0263	12.7333	3.8593e-37	0.0996	0.0031	1.0625	0.0106	0.0439	0.0077
Age at first live birth	0	ukbb	European	-0.3558	0.0288	-12.3536	4.6604e-35	0.1662	0.0075	1.0469	0.0089	-0.027	0.0074
Usual walking pace	0	ukbb	European	-0.3226	0.0272	-11.8404	2.4117e-32	0.0783	0.0028	1.0269	0.0097	-0.0707	0.0074
Age completed full time education	0	ukbb	European	-0.3332	0.0284	-11.7477	7.2567e-32	0.0845	0.0045	1.0624	0.0093	-0.0322	0.0065
Noisy workplace	0	ukbb	European	0.4022	0.0353	11.4028	4.0473e-30	0.0616	0.0056	1.0285	0.0074	0.016	0.0059
Waist circumference	25673412	anthropometric	European	0.2742	0.0248	11.0451	2.31e-28	0.1211	0.0051	0.8453	0.0075	0.0165	0.0059
Weight	0	ukbb	European	0.25	0.0229	10.8957	1.2089e-27	0.2647	0.0095	1.087	0.0216	0.1554	0.0086
Alcohol intake frequency.	0	ukbb	European	0.2863	0.0263	10.8759	1.501e-27	0.0836	0.004	1.0438	0.0103	0.0425	0.0074
Fed-up feelings	0	ukbb	European	0.2743	0.0254	10.7881	3.9197e-27	0.0719	0.0032	1.0239	0.01	0.0211	0.0062
Pain type(s) experienced in last month: None of the above	0	ukbb	European	-0.2828	0.0269	-10.5266	6.5168e-26	0.0551	0.0027	1.0368	0.0085	-0.0274	0.0065
Types of physical activity in last 4 weeks: Other exercises (eg: swimming_ cycling_ keep fit_ bowling)	0	ukbb	European	-0.3271	0.0312	-10.4898	9.6183e-26	0.0466	0.0024	1.0125	0.0084	-0.0677	0.0069
Alcohol intake versus 10 years previously	0	ukbb	European	0.356	0.0339	10.4878	9.8299e-26	0.0347	0.0023	1.03	0.0081	0.0115	0.0061
Waist-to-hip ratio	25673412	anthropometric	European	0.2875	0.0274	10.4838	1.03e-25	0.1129	0.007	0.9211	0.0089	0.0123	0.006
Fluid intelligence score	0	ukbb	European	-0.265	0.0257	-10.2956	7.372e-25	0.2375	0.0107	1.0428	0.0102	-0.0278	0.0069
Job involves shift work	0	ukbb	European	0.3774	0.0369	10.24	1.3127e-24	0.0308	0.0028	1.0017	0.0065	0.0331	0.0056
Mood swings	0	ukbb	European	0.2517	0.0247	10.188	2.2426e-24	0.071	0.0033	1.0173	0.0097	0.0152	0.0068
Transport type for commuting to job workplace: Cycle	0	ukbb	European	-0.3846	0.0383	-10.0464	9.5295e-24	0.0314	0.0033	1.0158	0.0076	-0.0312	0.0061
Qualifications: CSEs or equivalent	0	ukbb	European	0.4226	0.0426	9.9143	3.6066e-23	0.0207	0.0019	1.06	0.0073	0.0023	0.0065
Alcohol usually taken with meals	0	ukbb	European	-0.2739	0.028	-9.7889	1.2567e-22	0.11	0.0052	1.0593	0.009	-0.0336	0.0067
Age at last live birth	0	ukbb	European	-0.3509	0.0364	-9.6492	4.9535e-22	0.0883	0.0057	1.0169	0.0081	-0.0135	0.0067
Types of transport used (excluding work): Cycle	0	ukbb	European	-0.3558	0.0371	-9.5887	8.9233e-22	0.0247	0.0018	1.0257	0.0069	-0.0435	0.0056
Hip circumference	0	ukbb	European	0.2281	0.0238	9.5738	1.0301e-21	0.2172	0.0083	1.0812	0.0187	0.1387	0.0087
Mineral and other dietary supplements: None of the above	0	ukbb	European	0.3229	0.0339	9.5219	1.6997e-21	0.0301	0.0021	1.0093	0.0067	0.0529	0.006
Duration of walks	0	ukbb	European	0.2664	0.0282	9.4402	3.7224e-21	0.0466	0.0027	1.0067	0.0082	0.0343	0.0062
Types of physical activity in last 4 weeks: Walking for pleasure (not as a means of transport)	0	ukbb	European	-0.2966	0.0319	-9.2856	1.6076e-20	0.0373	0.002	1.0403	0.0072	-0.0561	0.0068
Medication for pain relief_ constipation_ heartburn: None of the above	0	ukbb	European	-0.2438	0.0263	-9.2767	1.748e-20	0.0541	0.0026	1.03	0.0089	-0.0209	0.0066
Frequency of unenthusiasm / disinterest in last 2 weeks	0	ukbb	European	0.2853	0.0309	9.2206	2.9541e-20	0.0388	0.0027	1.0175	0.0088	0.0056	0.0061
Snoring	0	ukbb	European	-0.2341	0.0255	-9.173	4.5985e-20	0.0595	0.0027	1.0247	0.0091	-0.0549	0.0056
Types of physical activity in last 4 weeks: Strenuous sports	0	ukbb	European	-0.3301	0.0361	-9.1353	6.5208e-20	0.0221	0.0017	1.0104	0.0069	-0.0419	0.0056
Illness_ injury_ bereavement_ stress in last 2 years: None of the above	0	ukbb	European	-0.3108	0.0342	-9.092	9.7193e-20	0.0231	0.0017	1.0118	0.006	-0.0067	0.0059
Wheeze or whistling in the chest in last year	0	ukbb	European	0.2593	0.0288	9.0082	2.0944e-19	0.06	0.003	1.0316	0.0098	0.0439	0.0066
Exposure to tobacco smoke outside home	0	ukbb	European	0.3101	0.035	8.86	7.9996e-19	0.0318	0.0024	1.0198	0.0083	0.033	0.0065
Shortness of breath walking on level ground	0	ukbb	European	0.3908	0.0447	8.7515	2.1049e-18	0.0492	0.0051	1.0078	0.0065	0.0226	0.0059
Pain type(s) experienced in last month: Back pain	0	ukbb	European	0.2731	0.0313	8.7376	2.3816e-18	0.0392	0.0023	1.0248	0.0092	0.0204	0.0064
Average weekly spirits intake	0	ukbb	European	0.3062	0.0352	8.7078	3.0988e-18	0.0316	0.0028	1.0168	0.0077	0.061	0.0062
Types of physical activity in last 4 weeks: None of the above	0	ukbb	European	0.3383	0.0394	8.583	9.2429e-18	0.0241	0.0018	1.0168	0.0073	0.0395	0.0059
Illness_ injury_ bereavement_ stress in last 2 years: Financial difficulties	0	ukbb	European	0.2661	0.0316	8.4262	3.572e-17	0.0333	0.0022	1.0273	0.008	0.0266	0.0062
Current tobacco smoking	0	ukbb	European	0.2596	0.0309	8.4066	4.2213e-17	0.0551	0.0027	1.0137	0.009	0.0168	0.0066
Smoking status: Current	0	ukbb	European	0.2596	0.0311	8.338	7.555e-17	0.0519	0.0027	1.0142	0.0088	0.0167	0.0065
Qualifications: O levels/GCSEs or equivalent	0	ukbb	European	-0.2624	0.0318	-8.2599	1.4578e-16	0.0485	0.0025	1.017	0.0094	-0.0442	0.0066
Diabetes diagnosed by doctor	0	ukbb	European	0.2584	0.032	8.0691	7.0791e-16	0.0437	0.0028	1.0396	0.0104	0.029	0.0067
Loneliness_ isolation	0	ukbb	European	0.2491	0.0311	8.0103	1.1441e-15	0.0379	0.0022	1.0232	0.0078	-0.0026	0.006
Pain type(s) experienced in last month: Knee pain	0	ukbb	European	0.2594	0.0325	7.9844	1.4125e-15	0.0406	0.0023	1.0145	0.0081	0.0311	0.0069
Non-cancer illness code_ self-reported: diabetes	0	ukbb	European	0.2792	0.0351	7.9596	1.726e-15	0.0357	0.0026	1.0379	0.0103	0.0256	0.0069
Health satisfaction	0	ukbb	European	0.3043	0.0383	7.9524	1.8291e-15	0.0828	0.0054	1.0066	0.0076	0.019	0.0065
Forced vital capacity (FVC)_ Best measure	0	ukbb	European	-0.1711	0.0215	-7.9499	1.8661e-15	0.1883	0.0084	1.0824	0.0165	-0.0535	0.0075
Hip circumference	25673412	anthropometric	European	0.1874	0.0241	7.7829	7.09e-15	0.1274	0.0058	0.8606	0.0081	0.0112	0.0057
Frequency of tiredness / lethargy in last 2 weeks	0	ukbb	European	0.2241	0.0288	7.782	7.1392e-15	0.06	0.0029	1.0247	0.0094	0.0172	0.006
Mineral and other dietary supplements: Glucosamine	0	ukbb	European	-0.2564	0.033	-7.7687	7.9304e-15	0.0245	0.002	1.0081	0.0074	-0.0361	0.0061
Frequency of depressed mood in last 2 weeks	0	ukbb	European	0.2297	0.0297	7.7287	1.0867e-14	0.0423	0.0028	1.0118	0.0083	-0.0005	0.006
Types of physical activity in last 4 weeks: Light DIY (eg: pruning_ watering the lawn)	0	ukbb	European	-0.2555	0.0332	-7.7071	1.2871e-14	0.0388	0.0022	1.0058	0.008	-0.029	0.0071
Leg pain on walking	0	ukbb	European	0.3043	0.0397	7.6632	1.8132e-14	0.0567	0.005	1.0105	0.0067	0.0187	0.0064
Forced vital capacity (FVC)	0	ukbb	European	-0.161	0.021	-7.6529	1.9643e-14	0.1699	0.0073	1.0958	0.0168	-0.0552	0.0075
Qualifications: NVQ or HND or HNC or equivalent	0	ukbb	European	0.3128	0.0409	7.652	1.9786e-14	0.0151	0.0017	1.0106	0.0068	0.0208	0.0056
Diagnoses - main ICD10: N20 Calculus of kidney and ureter	0	ukbb	European	0.4654	0.0611	7.6117	2.7055e-14	0.0081	0.0014	1.0079	0.0066	0.0049	0.0053
Townsend deprivation index at recruitment	0	ukbb	European	0.2601	0.0343	7.575	3.5916e-14	0.0337	0.002	1.035	0.0071	0.0326	0.0068
Pain type(s) experienced in last month: Neck or shoulder pain	0	ukbb	European	0.2407	0.0318	7.5595	4.046e-14	0.033	0.0019	1.025	0.0074	0.0127	0.0063
Obesity class 1	23563607	anthropometric	European	0.2433	0.0323	7.5321	4.99e-14	0.2174	0.0115	1.0179	0.011	0.0227	0.0079
Transport type for commuting to job workplace: Car/motor vehicle	0	ukbb	European	0.3333	0.0444	7.5122	5.8158e-14	0.0243	0.003	1.0242	0.0069	0.0063	0.0058
Financial situation satisfaction	0	ukbb	European	0.2825	0.0379	7.4566	8.8779e-14	0.0574	0.0059	1.0056	0.0081	0.0149	0.0058
Ever highly irritable/argumentative for 2 days	0	ukbb	European	0.2798	0.0376	7.44	1.0069e-13	0.0519	0.0058	0.9983	0.0077	0.018	0.0056
Mineral and other dietary supplements: Fish oil (including cod liver oil)	0	ukbb	European	-0.2537	0.0343	-7.394	1.4252e-13	0.0269	0.0019	1.0059	0.0072	-0.0559	0.0059
Vitamin and mineral supplements: None of the above	0	ukbb	European	0.2472	0.0336	7.357	1.8816e-13	0.03	0.0018	0.9946	0.0067	0.0473	0.0055
Illnesses of mother: Diabetes	0	ukbb	European	0.3063	0.0418	7.3274	2.3471e-13	0.0208	0.002	1.0158	0.0091	0.0136	0.006
Current employment status: Unable to work because of sickness or disability	0	ukbb	European	0.2875	0.0394	7.3038	2.7972e-13	0.0246	0.0019	1.0171	0.0074	0.0009	0.0064
Types of transport used (excluding work): Walk	0	ukbb	European	-0.2657	0.0365	-7.2809	3.3171e-13	0.0331	0.0023	1.0351	0.0087	-0.0484	0.007
Frequency of travelling from home to job workplace	0	ukbb	European	0.3695	0.0516	7.1601	8.064e-13	0.0217	0.0027	1.0175	0.0069	0.0246	0.006
Maternal smoking around birth	0	ukbb	European	0.2031	0.0285	7.1223	1.0611e-12	0.0498	0.0028	1.0359	0.0088	0.015	0.0062
Overweight	23563607	anthropometric	European	0.2303	0.0332	6.9293	4.23e-12	0.1095	0.0065	1.0245	0.0095	0.0211	0.0072
Arm predicted mass (left)	0	ukbb	European	0.1546	0.0227	6.8172	9.2861e-12	0.2636	0.0106	1.1137	0.0261	0.1277	0.0082
Chest pain or discomfort walking normally	0	ukbb	European	0.3357	0.0494	6.7917	1.1081e-11	0.0748	0.0094	1.0088	0.0071	0.011	0.0056
Long-standing illness_ disability or infirmity	0	ukbb	European	0.2117	0.0312	6.79	1.121e-11	0.0498	0.0024	1.0276	0.0086	0.0086	0.007
Vitamin and mineral supplements: Multivitamins +/- minerals	0	ukbb	European	-0.2376	0.0351	-6.7668	1.3163e-11	0.0236	0.0019	1.0076	0.0075	-0.0428	0.0059
Arm fat-free mass (left)	0	ukbb	European	0.1526	0.0227	6.7334	1.6571e-11	0.2644	0.0106	1.1116	0.0257	0.1282	0.0082
Frequency of stair climbing in last 4 weeks	0	ukbb	European	-0.1996	0.0298	-6.7081	1.9711e-11	0.035	0.0021	1.0171	0.0077	-0.0361	0.0061
Why stopped smoking: Health precaution	0	ukbb	European	-0.3272	0.0491	-6.6627	2.6882e-11	0.0543	0.0062	0.9989	0.0066	-0.011	0.0054
Illnesses of siblings: Diabetes	0	ukbb	European	0.305	0.0458	6.655	2.8337e-11	0.0205	0.0021	1.0094	0.007	0.0163	0.0059
Exposure to tobacco smoke at home	0	ukbb	European	0.2972	0.0448	6.6322	3.3074e-11	0.0117	0.0016	0.9989	0.0063	0.0367	0.0056
Pack years adult smoking as proportion of life span exposed to smoking PREVIEW ONLY	0	ukbb	European	0.2369	0.0359	6.5974	4.1843e-11	0.1269	0.011	1.0152	0.0092	0.0425	0.0063
Number of treatments/medications taken	0	ukbb	European	0.1809	0.0275	6.5897	4.4062e-11	0.0605	0.0026	1.032	0.0089	0.0214	0.0069
Medication for pain relief_ constipation_ heartburn: Paracetamol	0	ukbb	European	0.2083	0.0317	6.5792	4.729e-11	0.0429	0.0024	1.027	0.0083	0.0165	0.0063
Pack years of smoking PREVIEW ONLY	0	ukbb	European	0.2464	0.0375	6.5759	4.8357e-11	0.1095	0.0098	1.0157	0.0088	0.0423	0.0063
Taking other prescription medications	0	ukbb	European	0.1972	0.0301	6.5467	5.8809e-11	0.0433	0.0023	1.0162	0.0084	0.0075	0.0062
Weight change compared with 1 year ago	0	ukbb	European	0.3863	0.0591	6.5416	6.0865e-11	0.0085	0.0014	1.0228	0.0063	0.0437	0.0058
Chest pain or discomfort	0	ukbb	European	0.1912	0.0293	6.5318	6.4983e-11	0.0332	0.0022	1.0166	0.0079	0.0068	0.0058
Body mass index	20935630	anthropometric	European	0.2074	0.0318	6.5141	7.31e-11	0.19	0.0096	1.0102	0.0104	0.0268	0.0067
Diagnoses - main ICD10: R10 Abdominal and pelvic pain	0	ukbb	European	0.3062	0.047	6.5087	7.5827e-11	0.0121	0.0017	0.996	0.0073	0.0106	0.0057
Pain type(s) experienced in last month: Stomach or abdominal pain	0	ukbb	European	0.2329	0.0359	6.495	8.3033e-11	0.0216	0.0017	1.0062	0.0071	0.0104	0.006
Average weekly champagne plus white wine intake	0	ukbb	European	-0.2289	0.0356	-6.4295	1.2802e-10	0.0306	0.0026	1.0406	0.0078	-0.0174	0.006
Age started oral contraceptive pill	0	ukbb	European	-0.2413	0.0376	-6.4233	1.3336e-10	0.0486	0.0042	1.0152	0.0074	-0.0019	0.0061
Basal metabolic rate	0	ukbb	European	0.1422	0.0223	6.3768	1.8083e-10	0.2837	0.0114	1.1182	0.0272	0.1259	0.0081
Number of self-reported non-cancer illnesses	0	ukbb	European	0.1808	0.0287	6.309	2.8081e-10	0.0611	0.0026	1.0271	0.0101	0.0116	0.0069
Obesity class 2	23563607	anthropometric	European	0.2374	0.0377	6.2885	3.21e-10	0.1842	0.0122	1.0023	0.0098	0.022	0.0085
Sleeplessness / insomnia	0	ukbb	European	0.1698	0.0271	6.274	3.5188e-10	0.0623	0.0027	1.0183	0.0085	-0.0203	0.0065
Impedance of arm (left)	0	ukbb	European	-0.142	0.0228	-6.2225	4.8933e-10	0.2329	0.0081	1.0978	0.0212	-0.1458	0.0092
Fasting insulin main effect	22581228	glycemic	European	0.3302	0.0531	6.2164	5.09e-10	0.0697	0.0101	1.0158	0.0069	0.0008	0.0058
Arm predicted mass (right)	0	ukbb	European	0.1374	0.0224	6.1311	8.726e-10	0.2641	0.0108	1.1072	0.0268	0.1253	0.0081
Arm fat-free mass (right)	0	ukbb	European	0.1369	0.0224	6.1002	1.0594e-09	0.2653	0.0108	1.1055	0.0268	0.1258	0.0081
Smoking/smokers in household	0	ukbb	European	0.3129	0.0518	6.0411	1.5307e-09	0.0101	0.0019	1.0109	0.0075	0.0314	0.0057
Mineral and other dietary supplements: Zinc	0	ukbb	European	-0.288	0.0479	-6.0165	1.7822e-09	0.0109	0.0014	0.9894	0.0058	-0.0252	0.0061
Type 2 Diabetes	22885922	glycemic	European	0.2334	0.039	5.98	2.23e-09	0.0879	0.0093	1.0079	0.0071	0.002	0.0054
Impedance of arm (right)	0	ukbb	European	-0.1383	0.0232	-5.9665	2.4241e-09	0.2363	0.0081	1.0818	0.0217	-0.1488	0.0093
HOMA-IR	20081858	glycemic	European	0.37	0.0624	5.9339	2.96e-09	0.0683	0.0125	1.0032	0.0065	-0.0022	0.0055
Forced expiratory volume in 1-second (FEV1)_ Best measure	0	ukbb	European	-0.1383	0.0235	-5.8845	3.992e-09	0.1623	0.0071	1.0582	0.0135	-0.0498	0.007
Transport type for commuting to job workplace: Public transport	0	ukbb	European	-0.2578	0.044	-5.8539	4.8024e-09	0.0314	0.0034	1.0251	0.0074	-0.0238	0.0062
Frequency of tenseness / restlessness in last 2 weeks	0	ukbb	European	0.1612	0.0276	5.8503	4.9069e-09	0.0438	0.0027	1.0145	0.0093	-0.0035	0.0063
Seen doctor (GP) for nerves_ anxiety_ tension or depression	0	ukbb	European	0.1505	0.0259	5.8047	6.4484e-09	0.0613	0.003	1.0143	0.0096	-0.0188	0.0062
Leg predicted mass (left)	0	ukbb	European	0.1297	0.0224	5.7839	7.2987e-09	0.2655	0.0105	1.1076	0.0248	0.1193	0.0081
Leg fat-free mass (left)	0	ukbb	European	0.1296	0.0225	5.7664	8.0991e-09	0.2658	0.0105	1.1079	0.025	0.1196	0.0081
Time spent using computer	0	ukbb	European	-0.1492	0.026	-5.7369	9.6401e-09	0.096	0.0042	1.0449	0.0093	-0.0276	0.0066
Illness_ injury_ bereavement_ stress in last 2 years: Death of a close relative	0	ukbb	European	0.3883	0.0679	5.7227	1.0482e-08	0.0063	0.0015	1.0043	0.0062	-0.0002	0.0053
Forced expiratory volume in 1-second (FEV1)	0	ukbb	European	-0.1305	0.0229	-5.7116	1.1194e-08	0.1474	0.0061	1.0658	0.0134	-0.0538	0.0072
Types of physical activity in last 4 weeks: Heavy DIY (eg: weeding_ lawn mowing_ carpentry_ digging)	0	ukbb	European	-0.1761	0.0309	-5.6956	1.2291e-08	0.0342	0.002	1.0062	0.0072	-0.0256	0.006
Childhood IQ	23358156	education	European	-0.3428	0.0605	-5.6708	1.42e-08	0.2749	0.0449	1.0018	0.0092	0.0073	0.008
Pain type(s) experienced in last month: Hip pain	0	ukbb	European	0.221	0.0392	5.6437	1.6641e-08	0.0236	0.0019	1.0188	0.0077	0.0223	0.0062
Irritability	0	ukbb	European	0.1725	0.0306	5.6374	1.7262e-08	0.0679	0.0043	0.9929	0.0112	-0.002	0.0068
Illnesses of father: Lung cancer	0	ukbb	European	0.2446	0.0435	5.6225	1.8827e-08	0.0147	0.0019	0.9934	0.0072	0.0049	0.0053
Reason for glasses/contact lenses: For astigmatism	0	ukbb	European	-0.3089	0.055	-5.6161	1.953e-08	0.009	0.0015	1.0267	0.0066	-0.0429	0.0058
Ever vs never smoked	20418890	smoking_behaviour	European	0.21	0.0376	5.5818	2.38e-08	0.0747	0.0066	0.9976	0.006	-0.0008	0.0053
Pulse rate_ automated reading	0	ukbb	European	0.1226	0.022	5.5647	2.6262e-08	0.1542	0.0106	1.0474	0.0281	0.0682	0.0073
Neuroticism score	0	ukbb	European	0.1365	0.0248	5.5134	3.5192e-08	0.1183	0.0063	1.0175	0.0135	-0.0091	0.0068
Mineral and other dietary supplements: Calcium	0	ukbb	European	-0.2546	0.0472	-5.3929	6.9342e-08	0.0124	0.0016	0.9975	0.0064	-0.0353	0.0051
Neuroticism	27089181	personality	European	0.1603	0.0297	5.3893	7.07e-08	0.0892	0.0074	0.9901	0.0117	-0.0057	0.0068
Miserableness	0	ukbb	European	0.1558	0.029	5.3627	8.1985e-08	0.0642	0.0036	1.0181	0.011	-0.0007	0.0067
Vascular/heart problems diagnosed by doctor: None of the above	0	ukbb	European	-0.1457	0.0272	-5.3597	8.3346e-08	0.1133	0.0048	1.06	0.0158	-0.0421	0.0084
Diagnoses - main ICD10: R07 Pain in throat and chest	0	ukbb	European	0.2227	0.0419	5.3163	1.0587e-07	0.0163	0.0017	1.0053	0.0075	0.0182	0.0056
Non-cancer illness code_ self-reported: kidney stone/ureter stone/bladder stone	0	ukbb	European	0.3157	0.0597	5.2905	1.2199e-07	0.009	0.0016	1.0025	0.0077	0.0056	0.0052
Ever unenthusiastic/disinterested for a whole week	0	ukbb	European	0.214	0.0405	5.2827	1.273e-07	0.0574	0.0063	1.0003	0.0074	-0.0075	0.0057
Transport type for commuting to job workplace: Walk	0	ukbb	European	-0.2708	0.0513	-5.2795	1.2952e-07	0.0166	0.0026	1.0041	0.0062	-0.0107	0.0053
Diagnoses - main ICD10: M54 Dorsalgia	0	ukbb	European	0.3065	0.0582	5.2628	1.4185e-07	0.01	0.0015	1.0045	0.0073	0.0024	0.006
Falls in the last year	0	ukbb	European	0.1699	0.0325	5.2224	1.766e-07	0.0326	0.0021	1.004	0.0076	0.0159	0.0058
Medication for cholesterol_ blood pressure_ diabetes_ or take exogenous hormones: Cholesterol lowering medication	0	ukbb	European	0.2027	0.0397	5.1084	3.2492e-07	0.0508	0.0056	1.0247	0.0138	0.027	0.0065
Time spent driving	0	ukbb	European	0.1767	0.0349	5.0623	4.1429e-07	0.0425	0.0028	1.0013	0.0069	0.0295	0.0064
Leg fat-free mass (right)	0	ukbb	European	0.1122	0.0222	5.0493	4.4342e-07	0.2636	0.0105	1.115	0.0255	0.1112	0.0079
Leg predicted mass (right)	0	ukbb	European	0.1118	0.0222	5.0303	4.8979e-07	0.2633	0.0105	1.1147	0.0255	0.1111	0.0079
Average weekly beer plus cider intake	0	ukbb	European	0.1656	0.0331	4.999	5.7634e-07	0.0515	0.0035	1.063	0.0094	0.0133	0.0063
Non-cancer illness code_ self-reported: angina	0	ukbb	European	0.1803	0.0361	4.9955	5.8688e-07	0.0227	0.002	1.022	0.0077	0.0015	0.0061
Medication for pain relief_ constipation_ heartburn: Omeprazole (e.g. Zanprol)	0	ukbb	European	0.2151	0.0432	4.9757	6.5013e-07	0.0182	0.0017	1.0197	0.0071	0.0146	0.0066
Obesity class 3	23563607	anthropometric	European	0.2534	0.0511	4.9627	6.95e-07	0.1221	0.0141	0.9797	0.0091	0.0028	0.0083
Medication for cholesterol_ blood pressure or diabetes: Cholesterol lowering medication	0	ukbb	European	0.1825	0.0368	4.9538	7.2776e-07	0.0683	0.0063	1.033	0.0141	0.0092	0.0063
Medication for cholesterol_ blood pressure_ diabetes_ or take exogenous hormones: None of the above	0	ukbb	European	-0.1692	0.0342	-4.9446	7.6316e-07	0.066	0.0044	1.0182	0.0086	-0.0298	0.0065
Vascular/heart problems diagnosed by doctor: Heart attack	0	ukbb	European	0.1969	0.0399	4.9337	8.0675e-07	0.0188	0.0018	1.0125	0.0075	-0.0087	0.006
Fathers age at death	0	ukbb	European	-0.2167	0.0442	-4.909	9.1522e-07	0.0341	0.0031	1.0232	0.0079	-0.0265	0.0069
Duration of moderate activity	0	ukbb	European	0.1816	0.037	4.9053	9.3261e-07	0.0318	0.0024	1.0094	0.0075	0.0172	0.0061
Triglycerides	20686565	lipids	European	0.178	0.0367	4.851	1.23e-06	0.1683	0.029	0.9683	0.0162	0.0074	0.0079
Getting up in morning	0	ukbb	European	0.1282	0.0265	4.8292	1.3705e-06	0.0683	0.0031	1.0402	0.0104	0.0118	0.0067
Non-cancer illness code_ self-reported: gastro-oesophageal reflux (gord) / gastric reflux	0	ukbb	European	0.2326	0.0482	4.8234	1.4113e-06	0.0114	0.0016	1.0139	0.0072	0.0088	0.0053
Pulse rate	0	ukbb	European	0.147	0.0305	4.8181	1.4493e-06	0.1351	0.012	1.0255	0.0141	0.0274	0.0062
Vascular/heart problems diagnosed by doctor: Angina	0	ukbb	European	0.1743	0.0363	4.801	1.5788e-06	0.0221	0.0021	1.0251	0.0077	0.0023	0.0061
Current employment status: Doing unpaid or voluntary work	0	ukbb	European	-0.2591	0.0544	-4.761	1.9267e-06	0.0091	0.0014	1.0086	0.0062	-0.0262	0.0059
Medication for cholesterol_ blood pressure or diabetes: None of the above	0	ukbb	European	-0.1653	0.0349	-4.7419	2.1167e-06	0.0888	0.0051	1.0326	0.0101	-0.0176	0.0068
Non-cancer illness code_ self-reported: heart attack/myocardial infarction	0	ukbb	European	0.1871	0.0395	4.7413	2.1233e-06	0.0193	0.0018	1.0106	0.0073	-0.0079	0.0061
Reason for reducing amount of alcohol drunk: Health precaution	0	ukbb	European	-0.1954	0.0414	-4.714	2.4289e-06	0.046	0.0046	0.997	0.0069	-0.0434	0.0062
Diagnoses - main ICD10: M17 Gonarthrosis [arthrosis of knee]	0	ukbb	European	0.2203	0.0467	4.7133	2.437e-06	0.0139	0.0017	1.0065	0.0071	0.0138	0.0057
Mothers age at death	0	ukbb	European	-0.2387	0.0516	-4.6278	3.6953e-06	0.0239	0.0032	1.0299	0.0079	-0.0112	0.0061
Vascular/heart problems diagnosed by doctor: High blood pressure	0	ukbb	European	0.1266	0.0274	4.6195	3.8466e-06	0.1163	0.0051	1.0615	0.0171	0.0475	0.0084
Sensitivity / hurt feelings	0	ukbb	European	0.1179	0.0256	4.611	4.0071e-06	0.0625	0.0032	1.0214	0.0094	-0.0037	0.0057
Duration walking for pleasure	0	ukbb	European	-0.1718	0.0373	-4.6079	4.0676e-06	0.0254	0.0023	1.0111	0.0068	-0.032	0.0057
Illness_ injury_ bereavement_ stress in last 2 years: Serious illness_ injury or assault to yourself	0	ukbb	European	0.2185	0.0475	4.5957	4.3122e-06	0.0142	0.0016	1.0113	0.007	-0.0114	0.0065
Eye problems/disorders: Diabetes related eye disease	0	ukbb	European	0.3132	0.0683	4.5863	4.5119e-06	0.0198	0.0043	1.0065	0.0063	0.0141	0.0058
Former vs Current smoker	20418890	smoking_behaviour	European	-0.2688	0.0587	-4.5833	4.58e-06	0.0629	0.0104	1.0008	0.0066	0.0019	0.0051
Whole body water mass	0	ukbb	European	0.1	0.022	4.544	5.5185e-06	0.2883	0.012	1.1309	0.0291	0.1129	0.0081
Whole body fat-free mass	0	ukbb	European	0.0996	0.0219	4.5396	5.6366e-06	0.2882	0.012	1.1316	0.0293	0.1121	0.008
Prospective memory result	0	ukbb	European	0.1756	0.0387	4.5389	5.6537e-06	0.0574	0.0052	1.012	0.0078	0.0172	0.0059
Why stopped smoking: None of the above	0	ukbb	European	0.231	0.0509	4.5359	5.7345e-06	0.0403	0.0058	0.9975	0.0065	-0.0006	0.0052
Pain type(s) experienced in last month: Pain all over the body	0	ukbb	European	0.2437	0.0542	4.4988	6.8342e-06	0.0103	0.0016	1.0035	0.0074	0.0116	0.0059
Non-cancer illness code_ self-reported: high cholesterol	0	ukbb	European	0.1719	0.0383	4.4885	7.1724e-06	0.0403	0.0054	1.0566	0.0274	0.0154	0.0069
HDL cholesterol	20686565	lipids	European	-0.159	0.0356	-4.4729	7.71e-06	0.1278	0.0231	1.0575	0.0493	-0.0051	0.007
Reason for glasses/contact lenses: For short-sightedness_ i.e. only or mainly for distance viewing such as driving_ cinema etc (called myopia)	0	ukbb	European	-0.1705	0.0383	-4.4485	8.6463e-06	0.0254	0.0021	1.1158	0.0086	-0.0562	0.0063
Mouth/teeth dental problems: Dentures	0	ukbb	European	0.1512	0.0341	4.4355	9.1845e-06	0.048	0.0027	1.0359	0.0093	0.0503	0.0068
Non-cancer illness code_ self-reported: hypertension	0	ukbb	European	0.1217	0.0275	4.4322	9.3272e-06	0.1145	0.0051	1.0566	0.0172	0.0496	0.0084
Pain type(s) experienced in last month: Headache	0	ukbb	European	0.1309	0.0296	4.4229	9.7407e-06	0.0449	0.0027	1.0043	0.0093	-0.0079	0.006
Forced expiratory volume in 1-second (FEV1)_ predicted percentage	0	ukbb	European	-0.1194	0.0271	-4.402	1.0724e-05	0.2011	0.0098	1.0341	0.0097	-0.0287	0.0063
Impedance of whole body	0	ukbb	European	-0.099	0.0229	-4.3149	1.5965e-05	0.2577	0.0092	1.0901	0.0216	-0.1467	0.0087
Breastfed as a baby	0	ukbb	European	-0.1694	0.0394	-4.3047	1.6725e-05	0.0258	0.0023	1.0218	0.0069	-0.0389	0.0059
Past tobacco smoking	0	ukbb	European	-0.1148	0.0267	-4.2928	1.7647e-05	0.0913	0.0041	1.0207	0.0105	-0.0085	0.0075
Diagnoses - main ICD10: G56 Mononeuropathies of upper limb	0	ukbb	European	0.2056	0.0483	4.2589	2.0539e-05	0.0138	0.0018	1.0085	0.0074	0.0161	0.0063
Medication for pain relief_ constipation_ heartburn: Aspirin	0	ukbb	European	0.1683	0.0396	4.2441	2.1944e-05	0.0211	0.0019	1.0134	0.0071	0.0039	0.0062
Ever smoked	0	ukbb	European	0.1116	0.0265	4.2182	2.4621e-05	0.0752	0.0034	1.0219	0.0102	-0.0005	0.0071
Mineral and other dietary supplements: Selenium	0	ukbb	European	-0.2938	0.0697	-4.2179	2.466e-05	0.0063	0.0016	1.0005	0.0071	-0.0157	0.0054
Why stopped smoking: Doctors advice	0	ukbb	European	0.294	0.0702	4.1869	2.8285e-05	0.0184	0.0052	0.9973	0.0059	0.0113	0.0048
Mouth/teeth dental problems: None of the above	0	ukbb	European	-0.1413	0.0341	-4.1422	3.4393e-05	0.0375	0.002	1.0181	0.008	-0.0404	0.0061
Duration of other exercises	0	ukbb	European	0.2173	0.0526	4.1324	3.5902e-05	0.0188	0.0031	1.0087	0.007	0.0126	0.0053
Vitamin and mineral supplements: Vitamin D	0	ukbb	European	-0.2783	0.0674	-4.1317	3.6004e-05	0.006	0.0016	0.9977	0.0072	-0.0236	0.0057
Illnesses of mother: Chronic bronchitis/emphysema	0	ukbb	European	0.2034	0.0495	4.1106	3.946e-05	0.0128	0.0019	1.0036	0.0067	0.0006	0.0057
Bilateral oophorectomy (both ovaries removed)	0	ukbb	European	0.1962	0.0478	4.1045	4.0524e-05	0.0211	0.0033	1.0114	0.0072	0.0071	0.0058
Fasting glucose main effect	22581228	glycemic	European	0.1842	0.0452	4.0723	4.66e-05	0.0983	0.0189	0.9982	0.0093	0.0039	0.0057
Ever had prostate specific antigen (PSA) test	0	ukbb	European	-0.1645	0.0405	-4.0587	4.9349e-05	0.0339	0.0034	1.0039	0.0072	-0.0068	0.006
Diagnoses - main ICD10: N81 Female genital prolapse	0	ukbb	European	0.2177	0.054	4.0301	5.5744e-05	0.0072	0.0015	1.0241	0.0065	-0.0133	0.0053
Diagnoses - main ICD10: K80 Cholelithiasis	0	ukbb	European	0.239	0.0594	4.0239	5.7241e-05	0.0095	0.0018	1.0237	0.0084	0.0169	0.0062
Medication for pain relief_ constipation_ heartburn: Ibuprofen (e.g. Nurofen)	0	ukbb	European	0.1557	0.039	3.9936	6.5069e-05	0.0226	0.0017	0.9976	0.0064	0.0011	0.006
Diagnoses - main ICD10: K29 Gastritis and duodenitis	0	ukbb	European	0.2542	0.0637	3.9927	6.5326e-05	0.0073	0.0015	1.0045	0.0065	0.0009	0.006
Duration of vigorous activity	0	ukbb	European	0.1581	0.0397	3.9854	6.7376e-05	0.0363	0.0032	0.9906	0.0073	0.0054	0.0059
Diagnoses - main ICD10: K44 Diaphragmatic hernia	0	ukbb	European	0.3037	0.0763	3.9785	6.9354e-05	0.0051	0.0013	1.0051	0.0065	0.0093	0.0057
Ever used hormone-replacement therapy (HRT)	0	ukbb	European	0.1456	0.0366	3.9778	6.955e-05	0.0405	0.0033	0.9997	0.0071	-0.0111	0.0063
Diagnoses - main ICD10: I25 Chronic ischaemic heart disease	0	ukbb	European	0.1584	0.04	3.9644	7.3594e-05	0.0198	0.0023	1.021	0.0072	-0.0081	0.0064
Blood clot_ DVT_ bronchitis_ emphysema_ asthma_ rhinitis_ eczema_ allergy diagnosed by doctor: Hayfever_ allergic rhinitis or eczema	0	ukbb	European	-0.1029	0.026	-3.9628	7.4085e-05	0.0725	0.0054	1.0419	0.0151	-0.026	0.0068
Types of transport used (excluding work): Public transport	0	ukbb	European	-0.1498	0.0382	-3.9269	8.6054e-05	0.0221	0.0019	1.0267	0.007	-0.0149	0.0064
Non-cancer illness code_ self-reported: osteoarthritis	0	ukbb	European	0.1767	0.0452	3.9045	9.4435e-05	0.0189	0.0017	1.0279	0.0076	0.0163	0.0062
Standing height	0	ukbb	European	-0.0765	0.0199	-3.8454	0.0001	0.4497	0.0223	1.2527	0.0573	-0.0495	0.0108
Sleep duration	0	ukbb	European	-0.1167	0.0303	-3.8534	0.0001	0.0714	0.0037	1.0231	0.0101	-0.0075	0.0071
Ever stopped smoking for 6+ months	0	ukbb	European	0.2732	0.0715	3.8192	0.0001	0.0198	0.0053	1.0009	0.0066	0.0088	0.005
Sitting height	0	ukbb	European	-0.0705	0.0186	-3.792	0.0001	0.3203	0.0182	1.1394	0.0419	-0.0194	0.0087
Mean time to correctly identify matches	0	ukbb	European	-0.096	0.0249	-3.8497	0.0001	0.0733	0.0031	1.0307	0.0095	0.0019	0.0066
Types of transport used (excluding work): Car/motor vehicle	0	ukbb	European	0.1329	0.0348	3.8167	0.0001	0.0244	0.0017	1.0094	0.007	0.0148	0.0062
Neuroticism	24828478	personality	European	0.22	0.0581	3.7847	0.0002	0.0148	0.0033	1.0086	0.0062	-0.0086	0.0053
Drive faster than motorway speed limit	0	ukbb	European	-0.1149	0.0306	-3.7497	0.0002	0.0565	0.0028	1.0299	0.0087	-0.0129	0.0068
Adopted as a child	0	ukbb	European	0.3052	0.0806	3.7867	0.0002	0.0059	0.0014	1.0014	0.0065	-0.0058	0.0058
Diastolic blood pressure_ automated reading	0	ukbb	European	0.092	0.0244	3.7677	0.0002	0.1358	0.0057	1.0665	0.0155	0.0725	0.0077
Non-cancer illness code_ self-reported: hiatus hernia	0	ukbb	European	0.2312	0.0611	3.7858	0.0002	0.0083	0.0014	1.033	0.0065	0.0194	0.0062
Diagnoses - main ICD10: K57 Diverticular disease of intestine	0	ukbb	European	0.1619	0.0438	3.6962	0.0002	0.013	0.0015	1.0038	0.0066	0.0046	0.0055
Diagnoses - main ICD10: M23 Internal derangement of knee	0	ukbb	European	0.1979	0.0539	3.6734	0.0002	0.008	0.0018	1.0051	0.0072	0.0008	0.0058
Age of smoking initiation	20418890	smoking_behaviour	European	-0.3119	0.0862	-3.6192	0.0003	0.0622	0.0185	0.9991	0.0063	0.0078	0.0055
Pulse wave peak to peak time	0	ukbb	European	-0.1762	0.0485	-3.6303	0.0003	0.0396	0.0048	1.0099	0.0071	-0.0265	0.0062
Ever depressed for a whole week	0	ukbb	European	0.1415	0.0392	3.606	0.0003	0.0635	0.0052	0.9925	0.0068	-0.009	0.0058
Medication for cholesterol_ blood pressure or diabetes: Blood pressure medication	0	ukbb	European	0.1194	0.0328	3.6422	0.0003	0.1045	0.0055	1.0318	0.0101	0.0255	0.0074
Glycoprotein acetyls; mainly a1-acid glycoprotein	27005778	metabolites	European	0.2192	0.0621	3.5292	0.0004	0.1012	0.029	0.9853	0.0063	0.0037	0.0052
Tense / highly strung	0	ukbb	European	0.1061	0.0297	3.5684	0.0004	0.0572	0.0032	0.9955	0.0096	-0.0154	0.0069
Non-cancer illness code_ self-reported: mania/bipolar disorder/manic depression	0	ukbb	European	-0.2509	0.0708	-3.5468	0.0004	0.0055	0.0014	1.0008	0.0061	-0.0007	0.0052
Illnesses of father: Chronic bronchitis/emphysema	0	ukbb	European	0.1785	0.0505	3.5343	0.0004	0.0148	0.0019	1.0238	0.0069	0.0068	0.006
Illnesses of father: Diabetes	0	ukbb	European	0.1765	0.0496	3.5611	0.0004	0.0184	0.0022	1.0271	0.0076	0.0146	0.0065
Serum total triglycerides	27005778	metabolites	European	0.2038	0.0588	3.4665	0.0005	0.1265	0.0349	0.9919	0.0074	-0.0014	0.0054
Illnesses of siblings: None of the above (group 1)	0	ukbb	European	-0.1242	0.0355	-3.4946	0.0005	0.0362	0.0026	1.014	0.0077	-0.0233	0.0058
Hearing difficulty/problems: Yes	0	ukbb	European	0.1027	0.0297	3.4603	0.0005	0.0416	0.0024	1.0142	0.0089	-0.0033	0.0063
Home area population density - urban or rural: Scotland - Large Urban Area	0	ukbb	European	-0.2573	0.0754	-3.4153	0.0006	0.0112	0.0032	2.1365	0.0147	0.1219	0.0077
Extreme bmi	23563607	anthropometric	European	0.1369	0.0406	3.374	0.0007	0.6914	0.0552	1.03	0.0113	0.0258	0.0083
HbA1C	20858683	glycemic	European	0.1723	0.0506	3.405	0.0007	0.065	0.0116	0.9993	0.0071	0.0008	0.0053
Pain type(s) experienced in last month: Facial pain	0	ukbb	European	0.2026	0.0598	3.3888	0.0007	0.0069	0.0014	0.997	0.0061	-0.0059	0.006
Nap during day	0	ukbb	European	0.0783	0.0234	3.3466	0.0008	0.0807	0.0034	1.0232	0.0097	0.0196	0.006
Ever had hysterectomy (womb removed)	0	ukbb	European	0.1922	0.0574	3.346	0.0008	0.0216	0.0033	1.0055	0.0073	0.0044	0.0067
Light smokers_ at least 100 smokes in lifetime	0	ukbb	European	0.1203	0.0366	3.2817	0.001	0.0772	0.0075	1.0051	0.0074	0.0145	0.0059
Non-cancer illness code_ self-reported: depression	0	ukbb	European	0.122	0.037	3.3001	0.001	0.0186	0.0017	0.9995	0.0071	-0.0062	0.0055
HOMA-B	20081858	glycemic	European	0.1553	0.0475	3.2656	0.0011	0.0907	0.0133	0.9888	0.0063	-0.0013	0.0055
Non-cancer illness code_ self-reported: hayfever/allergic rhinitis	0	ukbb	European	-0.1226	0.0376	-3.2629	0.0011	0.0229	0.0024	1.0179	0.0085	-0.0149	0.006
Diagnoses - main ICD10: I20 Angina pectoris	0	ukbb	European	0.1852	0.057	3.2513	0.0011	0.0082	0.0015	1.0096	0.0069	-0.0051	0.006
Diagnoses - main ICD10: K52 Other non-infective gastro-enteritis and colitis	0	ukbb	European	0.2448	0.076	3.2206	0.0013	0.0049	0.0013	1.0037	0.006	-0.0033	0.0055
Lung cancer	27488534	cancer	European	0.1622	0.0508	3.1944	0.0014	0.3158	0.0672	1.0145	0.0073	0.0019	0.0057
Non-cancer illness code_ self-reported: eczema/dermatitis	0	ukbb	European	-0.1823	0.0572	-3.1883	0.0014	0.0083	0.0022	1.0148	0.007	0.001	0.0055
Alcohol drinker status: Previous	0	ukbb	European	0.1463	0.0457	3.203	0.0014	0.0132	0.0015	1.0072	0.0065	-0.0099	0.0059
Reproduciblity of spirometry measurement using ERS/ATS criteria	0	ukbb	European	0.15	0.0474	3.1661	0.0015	0.0144	0.0023	1.008	0.0072	-0.0073	0.0062
Pulse wave Arterial Stiffness index	0	ukbb	European	0.1545	0.0485	3.1841	0.0015	0.0386	0.005	1.0086	0.0073	0.0222	0.0061
Trunk predicted mass	0	ukbb	European	0.0681	0.0216	3.1473	0.0016	0.2844	0.0125	1.1385	0.0308	0.0972	0.008
Medication for cholesterol_ blood pressure or diabetes: Insulin	0	ukbb	European	0.3008	0.0955	3.1489	0.0016	0.0091	0.0032	1.0105	0.007	-0.0059	0.006
Trunk fat-free mass	0	ukbb	European	0.0678	0.0217	3.1311	0.0017	0.2859	0.0126	1.1392	0.031	0.0982	0.008
Mouth/teeth dental problems: Bleeding gums	0	ukbb	European	0.1312	0.0421	3.1156	0.0018	0.0223	0.0019	1.0113	0.008	0.0171	0.006
Concentration of medium VLDL particles	27005778	metabolites	European	0.1741	0.056	3.109	0.0019	0.1516	0.0353	0.9802	0.0067	-0.0019	0.0055
Diagnoses - main ICD10: K21 Gastro-oesophageal reflux disease	0	ukbb	European	0.2091	0.0681	3.0715	0.0021	0.0064	0.0013	1.0024	0.0057	0.0139	0.0061
Glutamine	27005778	metabolites	European	-0.2599	0.0855	-3.0391	0.0024	0.0608	0.0203	1.0192	0.0076	0.0117	0.0056
Diagnoses - main ICD10: I21 Acute myocardial infarction	0	ukbb	European	0.15	0.0494	3.0373	0.0024	0.0103	0.0016	1.0058	0.0072	-0.0086	0.0056
Cough on most days	0	ukbb	European	0.1549	0.0513	3.0192	0.0025	0.048	0.0064	0.9988	0.0069	0.0111	0.0062
Non-cancer illness code_ self-reported: back problem	0	ukbb	European	0.2028	0.0671	3.0241	0.0025	0.005	0.0013	1.0056	0.0063	0.0021	0.0054
Friendships satisfaction	0	ukbb	European	-0.109	0.0366	-2.9755	0.0029	0.0622	0.0053	0.9982	0.0072	-0.0113	0.0058
Phospholipids in small VLDL	27005778	metabolites	European	0.18	0.0607	2.9677	0.003	0.1176	0.0342	0.9982	0.0083	0.0006	0.0054
Triglycerides in small VLDL	27005778	metabolites	European	0.1869	0.0632	2.9595	0.0031	0.121	0.0347	0.994	0.0073	0.001	0.0054
Triglycerides in chylomicrons and largest VLDL particles	27005778	metabolites	European	0.1897	0.0643	2.9513	0.0032	0.0926	0.027	0.9901	0.0067	-0.0023	0.0055
Diagnoses - main ICD10: D12 Benign neoplasm of colon_ rectum_ anus and anal canal	0	ukbb	European	0.152	0.0526	2.892	0.0038	0.0086	0.0014	1.0037	0.0064	0.0037	0.0053
Frequency of walking for pleasure in last 4 weeks	0	ukbb	European	0.0998	0.0347	2.8775	0.004	0.0345	0.0026	1.0072	0.0077	0.0029	0.0057
Number of full brothers	0	ukbb	European	0.1213	0.0421	2.8778	0.004	0.0187	0.0018	1.0283	0.0074	-0.0013	0.006
Non-cancer illness code_ self-reported: cholelithiasis/gall stones	0	ukbb	European	0.1915	0.0665	2.878	0.004	0.0083	0.0017	1.0208	0.0079	0.007	0.0059
Fractured bone site(s): Ankle	0	ukbb	European	0.1772	0.0616	2.878	0.004	0.0065	0.0016	0.995	0.0065	0.0081	0.0063
Triglycerides in large VLDL	27005778	metabolites	European	0.1753	0.061	2.8736	0.0041	0.1136	0.0285	0.9883	0.0063	-0.0025	0.0053
Triglycerides in very small VLDL	27005778	metabolites	European	0.1758	0.0614	2.8648	0.0042	0.1396	0.036	0.9982	0.0096	0.0004	0.0058
Non-cancer illness code_ self-reported: pernicious anaemia	0	ukbb	European	0.2456	0.0865	2.8381	0.0045	0.0034	0.0012	0.9916	0.0063	-0.0007	0.0053
Number of operations_ self-reported	0	ukbb	European	0.0846	0.0299	2.8242	0.0047	0.0384	0.0023	1.0354	0.0077	0.0026	0.0059
Concentration of small VLDL particles	27005778	metabolites	European	0.1571	0.0561	2.7978	0.0051	0.1515	0.0368	0.99	0.0077	0.0028	0.0054
Morning/evening person (chronotype)	0	ukbb	European	-0.0684	0.0245	-2.7901	0.0053	0.1162	0.0042	1.041	0.0113	-0.0004	0.0071
Medication for cholesterol_ blood pressure_ diabetes_ or take exogenous hormones: Blood pressure medication	0	ukbb	European	0.0961	0.0344	2.7906	0.0053	0.1048	0.0068	1.0327	0.0119	0.0491	0.0077
No-wear time bias adjusted acceleration standard deviation	0	ukbb	European	-0.116	0.0423	-2.7404	0.0061	0.0895	0.0081	1.0011	0.0075	-0.0327	0.0058
Vitamin and mineral supplements: Vitamin C	0	ukbb	European	-0.1356	0.0495	-2.7384	0.0062	0.0131	0.0017	0.9991	0.0074	-0.0214	0.0056
Current employment status: Looking after home and/or family	0	ukbb	European	-0.1851	0.0678	-2.7284	0.0064	0.0062	0.0014	1.0002	0.0068	-0.0137	0.0057
Wears glasses or contact lenses	0	ukbb	European	-0.1097	0.0403	-2.7225	0.0065	0.0161	0.0017	1.001	0.0076	-0.0018	0.006
Number of live births	0	ukbb	European	0.0841	0.0311	2.7091	0.0067	0.0615	0.0042	1.0076	0.008	0.0083	0.0063
Mouth/teeth dental problems: Loose teeth	0	ukbb	European	0.1376	0.0508	2.7115	0.0067	0.0146	0.0017	1.0108	0.0069	0.0129	0.0067
Concentration of large VLDL particles	27005778	metabolites	European	0.161	0.06	2.6813	0.0073	0.1342	0.0342	0.9734	0.0068	0.0001	0.0054
Maximum workload during fitness test	0	ukbb	European	-0.1667	0.0621	-2.6849	0.0073	0.0425	0.01	1.0075	0.007	-0.0143	0.0053
Extreme waist-to-hip ratio	23563607	anthropometric	European	0.144	0.0539	2.6708	0.0076	0.36	0.0573	0.9773	0.0085	0.0094	0.0079
Total lipids in medium VLDL	27005778	metabolites	European	0.1511	0.0566	2.6715	0.0076	0.1416	0.034	0.9856	0.0066	0.0007	0.0054
Total lipids in small VLDL	27005778	metabolites	European	0.1572	0.0589	2.6668	0.0077	0.1455	0.0367	0.9917	0.0081	0.0027	0.0055
Blood clot_ DVT_ bronchitis_ emphysema_ asthma_ rhinitis_ eczema_ allergy diagnosed by doctor: Emphysema/chronic bronchitis	0	ukbb	European	0.1613	0.0606	2.6616	0.0078	0.0127	0.0017	0.9849	0.0072	0.0113	0.0066
Non-cancer illness code_ self-reported: emphysema/chronic bronchitis	0	ukbb	European	0.1784	0.0674	2.6461	0.0081	0.0098	0.0016	0.9876	0.007	0.0093	0.0062
Triglycerides in very large VLDL	27005778	metabolites	European	0.1449	0.0549	2.6375	0.0084	0.1192	0.0292	0.9812	0.007	-0.0028	0.0053
Smoking status: Previous	0	ukbb	European	0.0745	0.0284	2.6206	0.0088	0.052	0.003	1.02	0.0096	0.0104	0.0067
Illnesses of siblings: Heart disease	0	ukbb	European	0.1144	0.0437	2.6167	0.0089	0.017	0.0022	1.0124	0.0071	0.0156	0.0058
Mean diameter for VLDL particles	27005778	metabolites	European	0.1444	0.0553	2.6125	0.009	0.1358	0.035	0.99	0.0084	0.0004	0.0053
Suffer from nerves	0	ukbb	European	0.0754	0.0289	2.6109	0.009	0.0456	0.0032	0.9991	0.0095	-0.0119	0.0064
Number of children fathered	0	ukbb	European	0.1126	0.0433	2.6038	0.0092	0.0325	0.0036	1.0104	0.0071	0.0158	0.0058
Reason for glasses/contact lenses: For long-sightedness_ i.e. for distance and near_ but particularly for near tasks like reading (called hypermetropia)	0	ukbb	European	0.141	0.0541	2.6036	0.0092	0.01	0.0016	1.0638	0.0073	-0.0332	0.0059
LDL cholesterol	20686565	lipids	European	0.1223	0.0471	2.5958	0.0094	0.1042	0.0283	1.051	0.0481	7.95e-05	0.008
Phospholipids in large VLDL	27005778	metabolites	European	0.1557	0.06	2.5941	0.0095	0.1177	0.0303	0.9892	0.0064	-0.0021	0.0054
Alzheimers disease	24162737	neurological	European	0.1806	0.07	2.5809	0.0099	0.0449	0.0212	1.0657	0.0293	-0.0075	0.0061
Neo-openness to experience	21173776	personality	European	-0.1849	0.072	-2.5674	0.0102	0.1065	0.0268	0.9916	0.0066	-0.0049	0.0061
Rheumatoid Arthritis	24390342	autoimmune	European	0.0909	0.0356	2.5528	0.0107	0.16	0.0289	1.0234	0.0162	0.0052	0.0055
Triglycerides in IDL	27005778	metabolites	European	0.1802	0.0706	2.5526	0.0107	0.1074	0.0339	1.0108	0.0149	-0.0022	0.0059
Back pain for 3+ months	0	ukbb	European	0.1322	0.052	2.5427	0.011	0.04	0.0057	0.9923	0.0067	0.0064	0.0057
Tobacco smoking: Ex-smoker	0	ukbb	European	0.1124	0.0443	2.5368	0.0112	0.0769	0.008	1.0084	0.0081	0.0144	0.0065
Diagnoses - main ICD10: I83 Varicose veins of lower extremities	0	ukbb	European	-0.1031	0.0406	-2.5368	0.0112	0.0192	0.0023	1.0345	0.0111	0.0089	0.0066
Ever manic/hyper for 2 days	0	ukbb	European	0.163	0.0643	2.534	0.0113	0.0183	0.0048	0.9952	0.0064	0.0024	0.0054
Diagnoses - main ICD10: L03 Cellulitis	0	ukbb	European	0.2211	0.0879	2.5148	0.0119	0.0039	0.0015	1.0029	0.0069	0.0065	0.005
Total cholesterol in medium VLDL	27005778	metabolites	European	0.1408	0.0562	2.5052	0.0122	0.1266	0.0343	0.9918	0.0075	0.0006	0.0051
Celiac disease	20190752	autoimmune	European	-0.1321	0.0532	-2.4805	0.0131	0.3145	0.0483	1.0638	0.0106	-0.0027	0.0079
Length of working week for main job	0	ukbb	European	0.1231	0.0496	2.4813	0.0131	0.0194	0.0029	1.0087	0.0066	0.0157	0.0054
Total lipids in large VLDL	27005778	metabolites	European	0.1503	0.0607	2.478	0.0132	0.1411	0.03	0.9849	0.0063	-0.0011	0.0053
Illnesses of mother: Alzheimers disease/dementia	0	ukbb	European	-0.2815	0.1136	-2.4774	0.0132	0.004	0.0045	1.0338	0.0338	-0.0075	0.006
Phospholipids in medium VLDL	27005778	metabolites	European	0.1509	0.0616	2.4505	0.0143	0.1118	0.0322	0.9967	0.0068	0.0016	0.0054
Diagnoses - main ICD10: K30 Dyspepsia	0	ukbb	European	0.2535	0.1038	2.4429	0.0146	0.0031	0.0014	1.0039	0.0064	-0.0083	0.006
Triglycerides in medium VLDL	27005778	metabolites	European	0.1591	0.0652	2.4393	0.0147	0.0977	0.0298	0.9988	0.0064	0.0004	0.0055
Mean platelet volume	22139419	haemotological	European	0.1039	0.0427	2.4348	0.0149	0.3199	0.0511	0.9814	0.0108	-0.0097	0.0063
Current employment status: In paid employment or self-employed	0	ukbb	European	-0.1385	0.057	-2.4313	0.015	0.0081	0.0015	1.0193	0.0069	0.0228	0.0059
Blood clot_ DVT_ bronchitis_ emphysema_ asthma_ rhinitis_ eczema_ allergy diagnosed by doctor: Blood clot in the leg (DVT)	0	ukbb	European	0.1406	0.0578	2.4324	0.015	0.0105	0.0017	1.0115	0.0093	0.0019	0.0059
Illnesses of father: Prostate cancer	0	ukbb	European	-0.1387	0.0572	-2.4256	0.0153	0.0084	0.0019	1.0121	0.0079	-0.0042	0.0058
Diagnoses - main ICD10: R04 Haemorrhage from respiratory passages	0	ukbb	European	0.3053	0.1262	2.4197	0.0155	0.0026	0.0015	0.9972	0.0064	-0.0069	0.0056
Maximum heart rate during fitness test	0	ukbb	European	0.1291	0.0535	2.4156	0.0157	0.0678	0.0133	1.0166	0.0086	-0.0017	0.006
Isoleucine	27005778	metabolites	European	0.1647	0.0684	2.4089	0.016	0.0709	0.0235	0.9948	0.0066	0.0037	0.0055
Free cholesterol in large VLDL	27005778	metabolites	European	0.1293	0.0537	2.407	0.0161	0.1246	0.0296	0.9883	0.0067	6.2e-05	0.005
Sitting height ratio	25865494	anthropometric	European	-0.1066	0.0444	-2.4007	0.0164	0.2231	0.0282	0.9793	0.0075	0.0028	0.0061
Had major operations	0	ukbb	European	0.1151	0.0482	2.3873	0.017	0.0249	0.0035	1.006	0.0073	-0.0077	0.0058
18:2 linoleic acid (LA)	27005778	metabolites	European	0.1713	0.0718	2.3844	0.0171	0.1261	0.0463	1.0036	0.0097	-0.0007	0.0051
Number of full sisters	0	ukbb	European	0.1132	0.0475	2.3844	0.0171	0.0186	0.0017	1.0401	0.0066	-0.0066	0.006
Free cholesterol in small VLDL	27005778	metabolites	European	0.1499	0.0629	2.3825	0.0172	0.1121	0.0331	1	0.0087	0.0018	0.0054
Phospholipids in chylomicrons and largest VLDL particles	27005778	metabolites	European	0.1518	0.0639	2.3754	0.0175	0.0989	0.0267	0.9843	0.0068	-0.0033	0.0054
Concentration of very large VLDL particles	27005778	metabolites	European	0.1523	0.0643	2.3679	0.0179	0.1271	0.0295	0.9828	0.0067	-0.0003	0.0052
Diagnoses - main ICD10: I30 Acute pericarditis	0	ukbb	European	0.2424	0.1024	2.3667	0.0179	0.0023	0.0014	0.9949	0.0068	-0.0076	0.0052
Non-cancer illness code_ self-reported: chronic obstructive airways disease/copd	0	ukbb	European	0.1503	0.0636	2.3639	0.0181	0.006	0.0015	0.9925	0.007	0.0039	0.0057
Diagnoses - main ICD10: R31 Unspecified haematuria	0	ukbb	European	0.2633	0.1116	2.3597	0.0183	0.0032	0.0015	1.0071	0.0062	-0.0012	0.0056
Diagnoses - main ICD10: K60 Fissure and fistula of anal and rectal regions	0	ukbb	European	0.1422	0.0604	2.3539	0.0186	0.0055	0.0014	0.9819	0.0067	0.0047	0.0055
Number of days/week of moderate physical activity 10+ minutes	0	ukbb	European	0.0736	0.0315	2.3346	0.0196	0.0418	0.0025	1.0129	0.008	-0.007	0.0067
Duration of light DIY	0	ukbb	European	0.0896	0.0385	2.3259	0.02	0.0349	0.0034	1.0037	0.0073	0.0093	0.0057
Concentration of chylomicrons and largest VLDL particles	27005778	metabolites	European	0.1578	0.068	2.3196	0.0204	0.118	0.0268	0.9879	0.0065	0.0003	0.0054
Non-cancer illness code_ self-reported: sleep apnoea	0	ukbb	European	0.2239	0.097	2.308	0.021	0.0032	0.0014	1.0039	0.0069	0.0042	0.0062
Diagnoses - main ICD10: T84 Complications of internal orthopaedic prosthetic devices_ implants and grafts	0	ukbb	European	0.2191	0.0951	2.3026	0.0213	0.0052	0.0016	0.9907	0.007	-0.0044	0.0059
Non-cancer illness code_ self-reported: type 2 diabetes	0	ukbb	European	0.1546	0.0674	2.2933	0.0218	0.0063	0.0014	1.0113	0.0064	0.0144	0.0054
Free cholesterol in medium VLDL	27005778	metabolites	European	0.1382	0.0604	2.2877	0.0222	0.113	0.0324	0.9953	0.0069	0.0021	0.0054
Alcohol drinker status: Never	0	ukbb	European	0.1054	0.0462	2.283	0.0224	0.0145	0.0016	1.0157	0.0065	0.0159	0.0059
Infant head circumference	22504419	anthropometric	European	-0.1226	0.0539	-2.2747	0.0229	0.2287	0.0446	0.9908	0.0066	-0.0083	0.006
Phospholipids in very large VLDL	27005778	metabolites	European	0.1332	0.0586	2.2722	0.0231	0.1085	0.0278	0.9848	0.0068	-0.001	0.0052
Cancer code_ self-reported: basal cell carcinoma	0	ukbb	European	-0.1312	0.058	-2.2611	0.0238	0.0104	0.0019	0.9971	0.0079	-0.0075	0.0059
Non-cancer illness code_ self-reported: deep venous thrombosis (dvt)	0	ukbb	European	0.131	0.0579	2.2606	0.0238	0.011	0.0018	1.0094	0.0093	0.0018	0.0059
Diagnoses - main ICD10: J34 Other disorders of nose and nasal sinuses	0	ukbb	European	0.2602	0.1155	2.253	0.0243	0.0024	0.0014	1.0077	0.0065	0.0062	0.0051
Systolic blood pressure_ automated reading	0	ukbb	European	0.0546	0.0243	2.2503	0.0244	0.1275	0.0055	1.0666	0.0152	0.071	0.0073
Total cholesterol in large VLDL	27005778	metabolites	European	0.1312	0.0583	2.2489	0.0245	0.1188	0.0288	0.991	0.0066	0.0004	0.0052
Home area population density - urban or rural: England/Wales - Village - less sparse	0	ukbb	European	-0.3425	0.1527	-2.2435	0.0249	0.0022	0.0014	1.0243	0.0064	-0.021	0.0052
Time from waking to first cigarette	0	ukbb	European	-0.1342	0.0603	-2.2244	0.0261	0.0847	0.0258	1.0162	0.0074	-0.0027	0.0048
Hearing aid user	0	ukbb	European	0.1126	0.0507	2.2225	0.0262	0.0168	0.0027	1.0056	0.0067	0.0043	0.0055
Total Cholesterol	20686565	lipids	European	0.0842	0.0379	2.2203	0.0264	0.1344	0.024	1.0206	0.0347	0.005	0.0078
Impedance of leg (right)	0	ukbb	European	-0.0496	0.0224	-2.2208	0.0264	0.2397	0.0088	1.0925	0.0215	-0.1141	0.008
Fracture resulting from simple fall	0	ukbb	European	0.1574	0.071	2.2172	0.0266	0.0498	0.0138	0.9933	0.0063	0.0041	0.0061
Concentration of small LDL particles	27005778	metabolites	European	0.1937	0.0877	2.2092	0.0272	0.0926	0.0421	1.0079	0.0159	0.001	0.0058
Diagnoses - main ICD10: J44 Other chronic obstructive pulmonary disease	0	ukbb	European	0.1697	0.0772	2.1971	0.028	0.0046	0.0014	0.996	0.0068	0.001	0.0056
Illnesses of mother: None of the above (group 1)	0	ukbb	European	-0.0885	0.0404	-2.1904	0.0285	0.0169	0.0018	1.0127	0.0074	0.0021	0.0058
Relative age of first facial hair	0	ukbb	European	-0.0679	0.031	-2.1888	0.0286	0.1229	0.0078	1.0471	0.0152	-0.0112	0.0072
Had other major operations	0	ukbb	European	0.0914	0.0418	2.1876	0.0287	0.0305	0.0032	1.0096	0.0069	-0.0007	0.0059
Number of trend entries	0	ukbb	European	-0.1639	0.0754	-2.1745	0.0297	0.0313	0.0093	1.0056	0.0067	-0.0086	0.0057
Knee pain for 3+ months	0	ukbb	European	0.142	0.0658	2.1561	0.0311	0.0264	0.0069	1.0006	0.0065	0.0029	0.0054
Cholesterol esters in medium VLDL	27005778	metabolites	European	0.1194	0.0554	2.1533	0.0313	0.1529	0.0367	0.9861	0.0078	0.0025	0.0052
Relative age voice broke	0	ukbb	European	-0.0782	0.0364	-2.1478	0.0317	0.0722	0.0054	1.0109	0.0085	-0.0128	0.0061
Concentration of very small VLDL particles	27005778	metabolites	European	0.1409	0.0657	2.1436	0.0321	0.1162	0.0356	1.0055	0.0122	-0.0018	0.0058
Total lipids in very large VLDL	27005778	metabolites	European	0.1184	0.0554	2.1362	0.0327	0.1383	0.03	0.9779	0.0072	-0.0008	0.0052
Birth weight	27680694	anthropometric	European	-0.0626	0.0293	-2.1321	0.033	0.1024	0.0067	1.0419	0.0098	0.0023	0.0058
Cigarettes smoked per day	20418890	smoking_behaviour	European	0.1145	0.0537	2.1305	0.0331	0.0596	0.0149	1.005	0.006	-0.0028	0.0046
Crohns disease	26192919	autoimmune	European	0.07	0.033	2.1238	0.0337	0.5019	0.0572	1.0233	0.0117	0.0008	0.0058
Squamous cell lung cancer	27488534	cancer	European	0.1412	0.0665	2.1241	0.0337	0.039	0.0122	1.0106	0.0067	-0.001	0.0052
Loud music exposure frequency	0	ukbb	European	0.1038	0.0494	2.1005	0.0357	0.0292	0.0046	1.0126	0.007	0.0058	0.0055
Total lipids in chylomicrons and largest VLDL particles	27005778	metabolites	European	0.1313	0.0626	2.0982	0.0359	0.1215	0.0281	0.9893	0.0069	-0.0014	0.0053
Urinary albumin-to-creatinine ratio (non-diabetes)	26631737	kidney	European	-0.1417	0.0677	-2.0946	0.0362	0.0532	0.0106	0.995	0.0073	-0.0018	0.0068
Diagnoses - main ICD10: M70 Soft tissue disorders related to use_ overuse and pressure	0	ukbb	European	0.1806	0.0863	2.0933	0.0363	0.004	0.0013	0.983	0.0065	-0.0058	0.0064
Frequency of other exercises in last 4 weeks	0	ukbb	European	-0.1049	0.0504	-2.081	0.0374	0.0211	0.0033	0.9984	0.0065	-0.0291	0.0057
Asthma	17611496	autoimmune	European	0.1119	0.0538	2.0799	0.0375	0.123	0.0262	1.0074	0.0081	0.0017	0.0058
Cholesterol esters in large VLDL	27005778	metabolites	European	0.116	0.0558	2.0783	0.0377	0.1666	0.034	0.9771	0.0068	0.0016	0.0055
Vitamin and mineral supplements: Vitamin E	0	ukbb	European	-0.1227	0.0593	-2.0706	0.0384	0.0066	0.0014	0.9955	0.0063	-0.0246	0.0057
Duration of heavy DIY	0	ukbb	European	0.0923	0.0446	2.0691	0.0385	0.0333	0.0038	1.0078	0.0067	0.0167	0.0063
Bring up phlegm/sputum/mucus on most days	0	ukbb	European	0.1273	0.0616	2.068	0.0386	0.0263	0.006	1.0082	0.0072	0.013	0.0054
Number of cigarettes previously smoked daily	0	ukbb	European	0.08	0.0387	2.0658	0.0388	0.1004	0.014	1.0018	0.0089	0.0217	0.0059
Child birth weight	23202124	anthropometric	European	-0.0981	0.0484	-2.0284	0.0425	0.1112	0.018	1.0051	0.0058	0.0006	0.0051
Free cholesterol in large HDL	27005778	metabolites	European	-0.1186	0.0588	-2.0166	0.0437	0.1079	0.0284	1.0077	0.0139	-0.0118	0.0055
Mouth/teeth dental problems: Mouth ulcers	0	ukbb	European	-0.0681	0.034	-2.0026	0.0452	0.0291	0.0038	1.0315	0.011	-0.0075	0.006
Diagnoses - main ICD10: M24 Other specific joint derangements	0	ukbb	European	0.1869	0.0937	1.9951	0.046	0.0034	0.0013	0.9881	0.0061	-0.0012	0.0055
Total lipids in very small VLDL	27005778	metabolites	European	0.1357	0.0681	1.9934	0.0462	0.1062	0.0349	1.0102	0.0126	-0.0017	0.0058
Diagnoses - main ICD10: G47 Sleep disorders	0	ukbb	European	0.1396	0.0701	1.9921	0.0464	0.0063	0.0016	0.9943	0.0071	0.0104	0.0055
Hair/balding pattern: Pattern 3	0	ukbb	European	-0.0635	0.0319	-1.9898	0.0466	0.056	0.0141	1.02	0.0191	0.006	0.0057
Lung cancer (all)	24880342	cancer	European	0.1122	0.0566	1.9813	0.0476	0.1295	0.0292	1.007	0.0079	0.0086	0.006
Peak expiratory flow (PEF)	0	ukbb	European	-0.0586	0.0296	-1.98	0.0477	0.09	0.0047	1.0553	0.0122	-0.0372	0.0072
Mean diameter for HDL particles	27005778	metabolites	European	-0.1172	0.0593	-1.9763	0.0481	0.1211	0.0297	1.0079	0.0185	-0.0089	0.0055
Total lipids in small LDL	27005778	metabolites	European	0.187	0.0946	1.9765	0.0481	0.085	0.0443	1.0089	0.0176	0.0016	0.0059
Vitamin and mineral supplements: Vitamin B	0	ukbb	European	-0.1104	0.0567	-1.9455	0.0517	0.0075	0.0016	0.9995	0.0067	-0.0337	0.0056
Impedance of leg (left)	0	ukbb	European	-0.0437	0.0226	-1.9361	0.0529	0.2407	0.009	1.0823	0.0216	-0.1174	0.0081
Duration of strenuous sports	0	ukbb	European	0.1777	0.0921	1.93	0.0536	0.0309	0.0139	0.9939	0.007	0.0053	0.0053
Non-cancer illness code_ self-reported: varicose veins	0	ukbb	European	-0.1502	0.0786	-1.9108	0.056	0.0044	0.0014	1.0113	0.0063	-0.0045	0.0059
Medication for cholesterol_ blood pressure_ diabetes_ or take exogenous hormones: Hormone replacement therapy	0	ukbb	European	0.1025	0.0542	1.8896	0.0588	0.0156	0.0027	1.0011	0.006	-0.0101	0.0058
Diagnoses - main ICD10: K20 Oesophagitis	0	ukbb	European	0.2214	0.1185	1.869	0.0616	0.0022	0.0013	1.0064	0.0066	0.0085	0.0058
Diagnoses - main ICD10: M67 Other disorders of synovium and tendon	0	ukbb	European	0.2312	0.1242	1.8615	0.0627	0.0021	0.0013	0.9993	0.0061	-6.852e-05	0.0055
Worrier / anxious feelings	0	ukbb	European	0.0541	0.0291	1.8603	0.0628	0.0794	0.005	1.0009	0.0121	-0.011	0.0069
Illnesses of siblings: Severe depression	0	ukbb	European	-0.088	0.0476	-1.847	0.0647	0.014	0.0018	1.0051	0.0065	-0.0093	0.0056
Concentration of medium LDL particles	27005778	metabolites	European	0.1814	0.0983	1.8459	0.0649	0.0782	0.0475	1.0125	0.02	0.0016	0.0059
Medication for pain relief_ constipation_ heartburn: Laxatives (e.g. Dulcolax_ Senokot)	0	ukbb	European	0.0903	0.0492	1.8364	0.0663	0.0114	0.0016	1.0095	0.0067	-0.0122	0.006
Most recent bowel cancer screening	0	ukbb	European	-0.1818	0.0993	-1.8317	0.067	0.0117	0.0058	1.0118	0.0059	0.0095	0.0049
Started insulin within one year diagnosis of diabetes	0	ukbb	European	-0.1426	0.0785	-1.8165	0.0693	0.1553	0.0447	1.0047	0.0081	-0.0144	0.0059
Total cholesterol in large HDL	27005778	metabolites	European	-0.1077	0.0595	-1.8092	0.0704	0.1066	0.0283	1.006	0.0142	-0.011	0.0054
Height; Females at age 10 and males at age 12	23449627	anthropometric	European	-0.079	0.0438	-1.8025	0.0715	0.4306	0.0481	0.9525	0.008	0.0039	0.0065
Tinnitus: Yes_ but not now_ but have in the past	0	ukbb	European	0.1198	0.0667	1.7954	0.0726	0.0182	0.0043	0.9915	0.0063	-0.0033	0.0056
Current employment status: Retired	0	ukbb	European	-0.1012	0.0564	-1.7942	0.0728	0.0084	0.0015	1.0167	0.007	-0.0135	0.0058
Total cholesterol in small LDL	27005778	metabolites	European	0.1851	0.1036	1.7862	0.0741	0.0689	0.0425	1.017	0.0191	0.0017	0.0059
Hand grip strength (right)	0	ukbb	European	-0.0422	0.0237	-1.7783	0.0754	0.1039	0.0042	1.061	0.0131	0.0167	0.0072
Cholesterol esters in large HDL	27005778	metabolites	European	-0.1026	0.058	-1.7685	0.077	0.1253	0.031	1	0.014	-0.0106	0.0055
Blood clot_ DVT_ bronchitis_ emphysema_ asthma_ rhinitis_ eczema_ allergy diagnosed by doctor: Blood clot in the lung	0	ukbb	European	0.1093	0.0619	1.7654	0.0775	0.0059	0.0015	1.0083	0.0074	0.0115	0.0058
Childhood obesity	22484627	anthropometric	European	0.0663	0.0378	1.7558	0.0791	0.4137	0.0463	0.9262	0.0076	0.0007	0.0052
Phospholipids in medium LDL	27005778	metabolites	European	0.157	0.0897	1.7511	0.0799	0.072	0.0417	1.009	0.0191	0.0015	0.0056
Average weekly intake of other alcoholic drinks	0	ukbb	European	0.2454	0.1411	1.7399	0.0819	0.008	0.0059	1.0036	0.0065	0.0128	0.0057
Total lipids in large HDL	27005778	metabolites	European	-0.0961	0.0556	-1.7292	0.0838	0.1325	0.0307	1	0.0147	-0.0112	0.0055
Phospholipids in very large HDL	27005778	metabolites	European	-0.1175	0.0681	-1.7246	0.0846	0.0935	0.0301	1.0071	0.0165	-0.0093	0.0056
Daytime dozing / sleeping (narcolepsy)	0	ukbb	European	0.0535	0.0311	1.72	0.0854	0.0488	0.0027	1.0094	0.0087	0.0221	0.0063
Number of older siblings	0	ukbb	European	0.3252	0.1904	1.7076	0.0877	0.006	0.005	1.0067	0.0061	-0.0033	0.0056
Total lipids in medium LDL	27005778	metabolites	European	0.1655	0.097	1.7066	0.0879	0.0799	0.0488	1.0107	0.0207	0.0024	0.0059
Hand grip strength (left)	0	ukbb	European	-0.039	0.0229	-1.7041	0.0884	0.104	0.0041	1.0551	0.0123	0.0256	0.0068
Cancer code_ self-reported: malignant melanoma	0	ukbb	European	0.1143	0.0673	1.698	0.0895	0.005	0.0015	0.9937	0.0062	-0.0176	0.0055
Diagnoses - main ICD10: N92 Excessive_ frequent and irregular menstruation	0	ukbb	European	0.1279	0.0756	1.6913	0.0908	0.0071	0.0017	1.001	0.0074	0.0108	0.0063
Apolipoprotein B	27005778	metabolites	European	0.1374	0.0816	1.6849	0.092	0.082	0.0383	1.0092	0.0145	0.0043	0.0055
Number of unsuccessful stop-smoking attempts	0	ukbb	European	-0.0837	0.0498	-1.681	0.0928	0.0499	0.0074	1.0067	0.0068	-0.0011	0.006
Other eye problems	0	ukbb	European	0.0864	0.0518	1.6678	0.0954	0.0092	0.0015	1.0241	0.0071	-0.0121	0.0054
Non-cancer illness code_ self-reported: malabsorption/coeliac disease	0	ukbb	European	-0.1027	0.0619	-1.658	0.0973	0.0092	0.0049	1.0037	0.0138	-0.008	0.0056
Underlying (primary) cause of death: ICD10: J84.1 Other interstitial pulmonary diseases with fibrosis	0	ukbb	European	-0.1971	0.1196	-1.6487	0.0992	0.0952	0.0656	0.9944	0.007	0.0094	0.0052
Blood clot_ DVT_ bronchitis_ emphysema_ asthma_ rhinitis_ eczema_ allergy diagnosed by doctor: Asthma	0	ukbb	European	0.0452	0.0274	1.6486	0.0992	0.057	0.0056	1.0259	0.0147	0.0098	0.0066
Concentration of large HDL particles	27005778	metabolites	European	-0.0906	0.055	-1.6469	0.0996	0.1343	0.0301	0.9989	0.0149	-0.011	0.0055
Total cholesterol in small VLDL	27005778	metabolites	European	0.1218	0.074	1.6468	0.0996	0.091	0.0319	1.0055	0.0097	0.0039	0.0056
Non-cancer illness code_ self-reported: asthma	0	ukbb	European	0.0451	0.0274	1.6464	0.0997	0.0577	0.0057	1.0267	0.0148	0.0106	0.0065
Average weekly fortified wine intake	0	ukbb	European	-0.0953	0.0582	-1.6372	0.1016	0.0127	0.0023	1.0172	0.0067	-0.0095	0.0062
Cancer code_ self-reported: prostate cancer	0	ukbb	European	-0.0981	0.0601	-1.6318	0.1027	0.0062	0.0015	1.0143	0.0074	0.0078	0.0054
Concentration of large LDL particles	27005778	metabolites	European	0.1583	0.0972	1.6295	0.1032	0.0736	0.0489	1.0169	0.0214	0.0004	0.0059
Difference in height between adolescence and adulthood; age 14	23449627	anthropometric	European	-0.106	0.0651	-1.6292	0.1033	0.4516	0.1117	0.9813	0.0068	0.0053	0.0056
Worry too long after embarrassment	0	ukbb	European	-0.0532	0.0327	-1.6278	0.1036	0.0651	0.0033	1.0168	0.0097	-0.0309	0.0073
Concentration of IDL particles	27005778	metabolites	European	0.145	0.0897	1.6165	0.106	0.0733	0.0415	1.0193	0.018	-0.0015	0.0059
Diagnoses - main ICD10: H26 Other cataract	0	ukbb	European	0.0757	0.0473	1.5995	0.1097	0.0094	0.0016	0.9933	0.0073	-0.0018	0.0049
Illnesses of father: Heart disease	0	ukbb	European	-0.051	0.0321	-1.5861	0.1127	0.0304	0.0027	1.0011	0.0087	-0.0012	0.0062
Diagnoses - main ICD10: I10 Essential (primary) hypertension	0	ukbb	European	0.1518	0.0961	1.5803	0.114	0.0026	0.0013	0.9976	0.006	-0.003	0.005
Phospholipids in IDL	27005778	metabolites	European	0.1539	0.0974	1.5791	0.1143	0.0591	0.0404	1.0221	0.0192	-0.0028	0.0056
Number of cigarettes currently smoked daily (current cigarette smokers)	0	ukbb	European	0.0947	0.0607	1.559	0.119	0.1027	0.0261	1.0009	0.0067	0.0044	0.0051
Cholesterol esters in medium LDL	27005778	metabolites	European	0.1435	0.0923	1.5547	0.12	0.0791	0.0483	1.0108	0.0207	0.0029	0.0058
Phospholipids in large HDL	27005778	metabolites	European	-0.0868	0.0559	-1.5526	0.1205	0.1287	0.0301	0.9978	0.0138	-0.0111	0.0055
Non-cancer illness code_ self-reported: pulmonary embolism +/- dvt	0	ukbb	European	0.1022	0.0658	1.5524	0.1206	0.0056	0.0015	1.0077	0.0075	0.0116	0.0059
Difficulty not smoking for 1 day	0	ukbb	European	-0.0819	0.053	-1.5463	0.122	0.1119	0.0215	0.9892	0.0065	0.0013	0.0055
Non-accidental death in close genetic family	0	ukbb	European	-0.1021	0.0664	-1.5387	0.1239	0.0179	0.0047	0.9955	0.0064	0.0184	0.0056
Diagnoses - main ICD10: K62 Other diseases of anus and rectum	0	ukbb	European	0.1065	0.0697	1.5268	0.1268	0.005	0.0015	1.0018	0.0068	0.0006	0.0053
Duration of fitness test	0	ukbb	European	-0.1323	0.0867	-1.5252	0.1272	0.0202	0.0089	1.0044	0.0064	-0.0134	0.0051
Birth weight	0	ukbb	European	-0.0395	0.026	-1.5189	0.1288	0.1084	0.0061	1.0512	0.0137	-0.0037	0.0062
Non-cancer illness code_ self-reported: retinal detachment	0	ukbb	European	-0.1244	0.0822	-1.5141	0.13	0.0034	0.0013	1.0031	0.0065	0.0012	0.0062
Total lipids in large LDL	27005778	metabolites	European	0.1444	0.096	1.5034	0.1327	0.0732	0.05	1.0155	0.022	0.0009	0.0059
Phospholipids in large LDL	27005778	metabolites	European	0.15	0.1005	1.493	0.1354	0.0611	0.0436	1.0183	0.0212	-0.0012	0.0058
Non-cancer illness code_ self-reported: bladder problem (not cancer)	0	ukbb	European	0.1756	0.1176	1.493	0.1354	0.0022	0.0013	1.0021	0.007	-0.0024	0.0061
Underlying (primary) cause of death: ICD10: E85.4 Organ-limited amyloidosis	0	ukbb	European	0.2989	0.2016	1.4829	0.1381	0.0619	0.0608	0.9997	0.007	-0.0084	0.0058
Diagnoses - main ICD10: M25 Other joint disorders_ not elsewhere classified	0	ukbb	European	0.4191	0.2835	1.4782	0.1394	0.0011	0.0013	1.0153	0.0069	0.0089	0.0055
Platelet count	22139419	haemotological	European	0.052	0.0354	1.4682	0.1421	0.1207	0.0115	0.9842	0.0082	-0.0014	0.0054
Diagnoses - main ICD10: K43 Ventral hernia	0	ukbb	European	0.1023	0.0699	1.4639	0.1432	0.0054	0.0014	0.9932	0.0065	-0.0043	0.006
Diagnoses - main ICD10: N32 Other disorders of bladder	0	ukbb	European	0.1072	0.0739	1.4506	0.1469	0.004	0.0012	0.9896	0.0059	0.0048	0.0051
Diagnoses - main ICD10: D25 Leiomyoma of uterus	0	ukbb	European	0.1064	0.0734	1.4499	0.1471	0.0059	0.0014	0.9933	0.006	-0.006	0.0061
Total lipids in IDL	27005778	metabolites	European	0.1291	0.0893	1.4449	0.1485	0.0718	0.0428	1.0201	0.0188	-0.0012	0.0059
Doctor diagnosed hayfever or allergic rhinitis	0	ukbb	European	-0.0605	0.0423	-1.4325	0.152	0.0784	0.0089	1.0087	0.0081	-0.0093	0.0063
Non-cancer illness code_ self-reported: joint disorder	0	ukbb	European	0.1785	0.1249	1.4288	0.1531	0.0021	0.0013	0.9917	0.0063	0.0012	0.0058
Forced expiratory volume in 1-second (FEV1)_ predicted	0	ukbb	European	-0.0374	0.0263	-1.4242	0.1544	0.1714	0.0122	1.0398	0.0118	-0.0253	0.0067
Glucose	27005778	metabolites	European	0.0795	0.0564	1.4103	0.1585	0.086	0.0211	0.996	0.0065	0.0021	0.0055
Valine	27005778	metabolites	European	0.1083	0.0776	1.3945	0.1632	0.059	0.0197	1.0165	0.0075	0.0082	0.0052
Other serious medical condition/disability diagnosed by doctor	0	ukbb	European	0.0491	0.0353	1.3903	0.1644	0.0252	0.0018	1.0112	0.0073	-0.0068	0.0059
Non-cancer illness code_ self-reported: hyperthyroidism/thyrotoxicosis	0	ukbb	European	-0.0771	0.0558	-1.3815	0.1671	0.0076	0.0019	1.0063	0.0074	0.014	0.0056
Total cholesterol in LDL	27005778	metabolites	European	0.1299	0.0944	1.376	0.1688	0.0675	0.0496	1.0145	0.0238	0.0019	0.0059
Mouth/teeth dental problems: Toothache	0	ukbb	European	0.0711	0.053	1.3433	0.1792	0.0084	0.0016	1.0044	0.0072	0.0018	0.0047
Cholesterol esters in large LDL	27005778	metabolites	European	0.1223	0.0917	1.3338	0.1823	0.0746	0.0495	1.0132	0.0217	0.0023	0.0058
Phospholipids in very small VLDL	27005778	metabolites	European	0.1099	0.0825	1.3332	0.1825	0.084	0.0381	1.0155	0.0153	-0.0016	0.0058
Diagnoses - main ICD10: M72 Fibroblastic disorders	0	ukbb	European	-0.0665	0.0499	-1.3328	0.1826	0.0105	0.0031	1.0166	0.0206	0.004	0.0053
Total cholesterol in medium LDL	27005778	metabolites	European	0.1258	0.0952	1.3215	0.1863	0.0679	0.0463	1.0136	0.022	0.0022	0.0059
Comparative height size at age 10	0	ukbb	European	-0.0284	0.0216	-1.3132	0.1891	0.2408	0.0121	1.1151	0.0341	-0.0125	0.0088
Diagnoses - main ICD10: K22 Other diseases of oesophagus	0	ukbb	European	0.1269	0.0975	1.3024	0.1928	0.0041	0.0015	1.0046	0.0067	0.007	0.0064
Non-cancer illness code_ self-reported: anxiety/panic attacks	0	ukbb	European	0.0799	0.062	1.288	0.1977	0.0061	0.0013	1	0.006	-0.0023	0.0062
Diagnoses - main ICD10: I84 Haemorrhoids	0	ukbb	European	0.0724	0.0563	1.2858	0.1985	0.0093	0.0016	1.002	0.0074	0.0066	0.0053
Frequency of light DIY in last 4 weeks	0	ukbb	European	-0.0577	0.0452	-1.276	0.202	0.022	0.0029	1.0047	0.0063	-0.0068	0.0057
Tinnitus: Yes_ now some of the time	0	ukbb	European	0.107	0.0843	1.2697	0.2042	0.0089	0.004	0.999	0.0063	0.0009	0.0056
Diagnoses - main ICD10: Z09 Follow-up examination after treatment for conditions other than malignant neoplasms	0	ukbb	European	0.1054	0.0831	1.2676	0.2049	0.0031	0.0013	0.9992	0.0061	-0.0029	0.0053
Inflammatory Bowel Disease (Euro)	26192919	autoimmune	European	0.0395	0.0312	1.2649	0.2059	0.3328	0.0331	1.0544	0.0102	0.0052	0.0054
Non-cancer illness code_ self-reported: diverticular disease/diverticulitis	0	ukbb	European	0.0594	0.0471	1.2633	0.2065	0.0126	0.0017	0.9941	0.007	0.0196	0.0056
Type of tobacco previously smoked: Cigars or pipes	0	ukbb	European	-0.112	0.0895	-1.2511	0.2109	0.0126	0.0053	0.9995	0.0061	-0.0066	0.0057
Age when periods started (menarche)	0	ukbb	European	-0.0317	0.0257	-1.2363	0.2164	0.2093	0.0105	1.004	0.0123	-0.0004	0.0072
Non-cancer illness code_ self-reported: gout	0	ukbb	European	0.048	0.0392	1.2254	0.2204	0.0247	0.0066	0.9924	0.0187	0.0044	0.0059
Comparative body size at age 10	0	ukbb	European	-0.0338	0.028	-1.2077	0.2271	0.1454	0.009	1.0166	0.0166	0.0201	0.0073
Vitamin and mineral supplements: Vitamin A	0	ukbb	European	-0.096	0.0814	-1.1796	0.2382	0.0036	0.0015	1.0039	0.0063	-0.0125	0.0059
Total cholesterol in large LDL	27005778	metabolites	European	0.1099	0.0932	1.1787	0.2385	0.064	0.0458	1.0157	0.0225	0.0004	0.0059
Neck/shoulder pain for 3+ months	0	ukbb	European	0.091	0.0782	1.1641	0.2444	0.0212	0.0062	1.0081	0.0073	0.0047	0.0059
Diagnoses - main ICD10: J22 Unspecified acute lower respiratory infection	0	ukbb	European	0.1267	0.1098	1.1534	0.2487	0.0028	0.0015	0.9995	0.0073	0.0076	0.0055
Number of pregnancy terminations	0	ukbb	European	0.056	0.05	1.1191	0.2631	0.0597	0.0098	1.0077	0.0073	-0.0036	0.005
Cancer code_ self-reported: squamous cell carcinoma	0	ukbb	European	-0.1301	0.1165	-1.1168	0.2641	0.0022	0.0013	0.9999	0.0064	-0.0004	0.0055
Hair/balding pattern: Pattern 2	0	ukbb	European	0.0397	0.0368	1.0796	0.2803	0.0517	0.0065	1.0344	0.0133	-0.005	0.0059
Total cholesterol in IDL	27005778	metabolites	European	0.0927	0.0869	1.0665	0.2862	0.0693	0.0443	1.0197	0.0197	7.45e-07	0.0057
Diagnoses - main ICD10: K40 Inguinal hernia	0	ukbb	European	0.0439	0.0418	1.0503	0.2936	0.0183	0.0021	0.9916	0.007	-0.0034	0.0061
Cancer code_ self-reported: small intestine/small bowel cancer	0	ukbb	European	-0.1899	0.1822	-1.0426	0.2971	0.0011	0.0014	0.9988	0.0069	0.0034	0.0062
Non-cancer illness code_ self-reported: migraine	0	ukbb	European	0.0472	0.0454	1.0401	0.2983	0.0166	0.0018	1.0121	0.0074	-0.0126	0.0059
Free cholesterol in large LDL	27005778	metabolites	European	0.0947	0.0911	1.0398	0.2984	0.0624	0.0474	1.0179	0.0235	-0.0007	0.0059
Non-cancer illness code_ self-reported: hypopituitarism	0	ukbb	European	0.134	0.1296	1.0342	0.301	0.0015	0.0012	0.9908	0.0061	-0.0097	0.0054
Illnesses of father: High blood pressure	0	ukbb	European	-0.043	0.0423	-1.0162	0.3096	0.0193	0.0017	1.0136	0.007	-0.0113	0.0059
Distance between home and job workplace	0	ukbb	European	-0.0616	0.0612	-1.0052	0.3148	0.0116	0.0032	1.0074	0.0068	-0.0148	0.0051
Apolipoprotein A-I	27005778	metabolites	European	0.0703	0.0702	1.0011	0.3168	0.0737	0.0309	1.0051	0.0119	-0.0098	0.0055
Diagnoses - main ICD10: Z47 Other orthopaedic follow-up care	0	ukbb	European	0.0777	0.0778	0.9984	0.3181	0.0036	0.0012	0.9969	0.0062	-0.0033	0.0054
Illnesses of mother: Heart disease	0	ukbb	European	0.0407	0.0415	0.9829	0.3256	0.0156	0.0018	1.0111	0.0068	0.0027	0.0058
Free cholesterol in IDL	27005778	metabolites	European	0.0801	0.0826	0.9695	0.3323	0.0693	0.041	1.0211	0.0198	-0.0025	0.0056
Non-cancer illness code_ self-reported: muscle or soft tissue injuries	0	ukbb	European	0.1162	0.12	0.9684	0.3328	0.0023	0.0014	1.0005	0.0072	0.0046	0.0056
Diagnoses - main ICD10: R69 Unknown and unspecified causes of morbidity	0	ukbb	European	0.0621	0.0642	0.9668	0.3337	0.0053	0.0014	0.9981	0.0067	-0.0023	0.0054
Former alcohol drinker	0	ukbb	European	0.0501	0.0524	0.9562	0.339	0.1232	0.0214	0.9966	0.0063	-0.0181	0.005
Seen a psychiatrist for nerves_ anxiety_ tension or depression	0	ukbb	European	0.0308	0.0323	0.9559	0.3391	0.0311	0.0021	1.0045	0.0081	-0.0066	0.0063
Handedness (chirality/laterality): Use both right and left hands equally	0	ukbb	European	0.0772	0.0817	0.9454	0.3445	0.0042	0.0014	1.0061	0.0066	-0.0017	0.0059
Diagnoses - main ICD10: R11 Nausea and vomiting	0	ukbb	European	0.1615	0.1711	0.9436	0.3453	0.0012	0.0013	0.9949	0.0061	0.0056	0.0055
Illness_ injury_ bereavement_ stress in last 2 years: Marital separation/divorce	0	ukbb	European	0.069	0.0735	0.9384	0.348	0.0041	0.0014	1.0099	0.0067	0.0107	0.0053
Total cholesterol in HDL	27005778	metabolites	European	-0.0562	0.0603	-0.9318	0.3515	0.095	0.0283	1.0062	0.0127	-0.0094	0.0055
Illnesses of mother: None of the above (group 2)	0	ukbb	European	-0.0511	0.0549	-0.9312	0.3517	0.0092	0.0018	1.0009	0.0065	0.0123	0.0057
Non-cancer illness code_ self-reported: hypothyroidism/myxoedema	0	ukbb	European	0.0306	0.0336	0.912	0.3618	0.0505	0.0058	1.031	0.0152	-0.0089	0.0064
Diagnoses - main ICD10: F43 Reaction to severe stress_ and adjustment disorders	0	ukbb	European	0.3828	0.4211	0.9089	0.3634	0.0007	0.0012	1.003	0.0055	-0.004	0.0054
Non-cancer illness code_ self-reported: ulcerative colitis	0	ukbb	European	-0.0523	0.0581	-0.8996	0.3683	0.0059	0.0017	1.0108	0.008	-0.0095	0.0052
Omega-3 fatty acids	27005778	metabolites	European	0.0565	0.063	0.897	0.3697	0.1552	0.0414	0.9911	0.0077	-0.0048	0.0054
Non-cancer illness code_ self-reported: vitiligo	0	ukbb	European	0.1042	0.1168	0.8923	0.3722	0.0017	0.0014	0.9933	0.007	-0.0071	0.005
Had menopause	0	ukbb	European	0.0484	0.0543	0.8919	0.3725	0.02	0.0041	1.005	0.007	-0.0076	0.0056
Height_2010	20881960	anthropometric	European	-0.0214	0.024	-0.8898	0.3736	0.2854	0.0164	1.0186	0.0188	-0.0309	0.0075
Fractured bone site(s): Other bones	0	ukbb	European	0.0459	0.053	0.8669	0.386	0.009	0.0017	1.0005	0.007	0.0076	0.0058
Urinary albumin-to-creatinine ratio	26631737	kidney	European	-0.0554	0.0646	-0.8577	0.3911	0.0454	0.0088	0.9964	0.0068	0.0006	0.0063
Phospholipids in medium HDL	27005778	metabolites	European	0.063	0.0741	0.8494	0.3957	0.0658	0.0234	0.9958	0.0077	-0.0083	0.0057
Diagnoses - main ICD10: S76 Injury of muscle and tendon at hip and thigh level	0	ukbb	European	-0.1032	0.1247	-0.8281	0.4076	0.0015	0.0012	0.9982	0.0064	0.0096	0.0057
Diagnoses - main ICD10: O75 Other complications of labour and delivery_ not elsewhere classified	0	ukbb	European	-0.0705	0.0855	-0.8247	0.4096	0.0031	0.0012	0.9875	0.0058	0.0082	0.0056
Non-cancer illness code_ self-reported: crohns disease	0	ukbb	European	0.0571	0.0693	0.8231	0.4104	0.0052	0.0015	1.0052	0.0067	0.0033	0.0056
Creatinine	27005778	metabolites	European	0.0415	0.0508	0.8168	0.414	0.1156	0.0243	1.0118	0.0071	-0.008	0.0054
Handedness (chirality/laterality): Left-handed	0	ukbb	European	-0.0436	0.054	-0.8071	0.4196	0.0098	0.0016	1.0055	0.0071	-0.0084	0.0055
Birth weight of first child	0	ukbb	European	-0.0243	0.0306	-0.7935	0.4275	0.1085	0.0065	1.0237	0.0097	-0.0115	0.0069
Description of average fatty acid chain length; not actual carbon number	27005778	metabolites	European	-0.0499	0.0629	-0.7931	0.4277	0.1005	0.0333	0.9829	0.0065	0.0052	0.0048
Eye problems/disorders: Glaucoma	0	ukbb	European	-0.0356	0.0454	-0.7842	0.4329	0.0385	0.0055	1.0196	0.0078	0.016	0.0057
Non-cancer illness code_ self-reported: iron deficiency anaemia	0	ukbb	European	-0.0516	0.0673	-0.7669	0.4432	0.0045	0.0013	0.99	0.0058	-0.0103	0.0056
Non-cancer illness code_ self-reported: allergy or anaphylactic reaction to drug	0	ukbb	European	0.1318	0.1723	0.7649	0.4443	0.001	0.0013	1.0077	0.006	0.0039	0.0059
Family relationship satisfaction	0	ukbb	European	-0.03	0.0393	-0.7629	0.4455	0.0575	0.005	1.0043	0.0073	-0.0089	0.0055
Frequency of heavy DIY in last 4 weeks	0	ukbb	European	0.044	0.058	0.7591	0.4478	0.02	0.0036	1.0102	0.0062	0.007	0.0058
Fractured/broken bones in last 5 years	0	ukbb	European	0.0278	0.0378	0.7353	0.4622	0.0187	0.0021	1.0081	0.0074	0.0115	0.0053
Reason for glasses/contact lenses: For just reading/near work as you are getting older (called presbyopia)	0	ukbb	European	0.0541	0.0779	0.6937	0.4879	0.0038	0.0017	1.1369	0.008	-0.0484	0.0058
Hearing difficulty/problems with background noise	0	ukbb	European	0.0197	0.0285	0.691	0.4895	0.0516	0.0026	1.0201	0.0082	-0.0018	0.0065
Eye problems/disorders: Cataract	0	ukbb	European	0.0395	0.0573	0.6902	0.4901	0.0232	0.0043	1.0134	0.0068	0.0106	0.0057
Work/job satisfaction	0	ukbb	European	0.0324	0.0481	0.6739	0.5004	0.0486	0.0068	0.9945	0.0067	-0.0045	0.0062
Diagnoses - main ICD10: F31 Bipolar affective disorder	0	ukbb	European	-0.0521	0.0788	-0.6617	0.5082	0.0049	0.0015	0.9871	0.007	-0.0085	0.0055
Diagnoses - main ICD10: K50 Crohns disease [regional enteritis]	0	ukbb	European	0.0459	0.0699	0.6574	0.5109	0.0044	0.0014	1.0028	0.0066	-0.0011	0.0056
Alanine	27005778	metabolites	European	0.0428	0.0655	0.6541	0.5131	0.0837	0.0271	1.0124	0.0073	0.0013	0.0055
Diagnoses - main ICD10: C44 Other malignant neoplasms of skin	0	ukbb	European	-0.0343	0.0525	-0.6539	0.5132	0.0098	0.0023	1.0104	0.0086	0.0007	0.0055
Parkinsons disease	19915575	neurological	European	0.0251	0.0384	0.6535	0.5135	0.4085	0.119	1.1237	0.0091	-0.0004	0.0052
Number of incorrect matches in round	0	ukbb	European	-0.0187	0.0289	-0.646	0.5183	0.0545	0.0027	1.0045	0.0089	0.008	0.0069
Ever had stillbirth_ spontaneous miscarriage or termination	0	ukbb	European	0.033	0.0527	0.6255	0.5316	0.0198	0.0032	0.9958	0.0078	-0.0013	0.0061
Diagnoses - main ICD10: R35 Polyuria	0	ukbb	European	0.0568	0.0922	0.6154	0.5383	0.0029	0.0015	0.9983	0.0066	0.0006	0.0051
Illnesses of father: None of the above (group 2)	0	ukbb	European	-0.0324	0.053	-0.6108	0.5413	0.0094	0.0017	1.0015	0.0072	-0.0009	0.0054
Diagnoses - main ICD10: C50 Malignant neoplasm of breast	0	ukbb	European	-0.0315	0.052	-0.6054	0.5449	0.0089	0.0016	1.0033	0.0076	0.0084	0.0053
Heel bone mineral density (BMD) T-score_ automated (left)	0	ukbb	European	-0.0172	0.029	-0.5938	0.5526	0.3003	0.0359	1.0319	0.0213	0.0185	0.0082
Illnesses of father: None of the above (group 1)	0	ukbb	European	0.0273	0.0466	0.5865	0.5575	0.0148	0.0018	1.0231	0.0068	-0.0025	0.0059
Ever had bowel cancer screening	0	ukbb	European	-0.0264	0.0453	-0.5832	0.5598	0.0129	0.0017	1.0206	0.0069	-0.0379	0.0056
Happiness	0	ukbb	European	0.0216	0.038	0.5678	0.5702	0.0616	0.0049	1.0045	0.0076	-0.009	0.0053
Diagnoses - main ICD10: N40 Hyperplasia of prostate	0	ukbb	European	0.0406	0.0715	0.5675	0.5704	0.0058	0.0015	1.0099	0.0067	0.0114	0.0057
Illnesses of mother: Breast cancer	0	ukbb	European	-0.0312	0.0556	-0.5616	0.5744	0.0094	0.0019	1.0072	0.0081	-0.0097	0.0057
Non-cancer illness code_ self-reported: ankylosing spondylitis	0	ukbb	European	0.0765	0.1368	0.5589	0.5762	0.0016	0.0014	1.0026	0.0064	-0.0018	0.006
Blood clot_ DVT_ bronchitis_ emphysema_ asthma_ rhinitis_ eczema_ allergy diagnosed by doctor: None of the above	0	ukbb	European	0.0143	0.0256	0.5569	0.5776	0.0766	0.0062	1.0365	0.0165	0.0132	0.0069
Diagnoses - main ICD10: S52 Fracture of forearm	0	ukbb	European	-0.0416	0.0751	-0.5544	0.5793	0.0064	0.0018	0.9989	0.0071	-0.012	0.0061
Non-cancer illness code_ self-reported: glaucoma	0	ukbb	European	-0.0281	0.051	-0.5518	0.5811	0.011	0.0017	1.0147	0.0079	-0.0044	0.0057
Illnesses of siblings: High blood pressure	0	ukbb	European	0.0178	0.0326	0.5448	0.5859	0.0366	0.0027	1.007	0.008	0.0156	0.006
Diagnoses - main ICD10: M10 Gout	0	ukbb	European	-0.0587	0.1082	-0.5426	0.5874	0.0022	0.0015	0.9998	0.0068	0.0018	0.0056
Non-cancer illness code_ self-reported: nasal polyps	0	ukbb	European	0.0336	0.0635	0.5291	0.5967	0.0051	0.0016	1.007	0.0066	-0.0074	0.0053
Average number of double bonds in a fatty acid chain	27005778	metabolites	European	-0.0291	0.0553	-0.5257	0.5991	0.1723	0.0533	1.0015	0.0077	-0.0003	0.0054
Systemic lupus erythematosus	26502338	autoimmune	European	-0.0262	0.0498	-0.5257	0.5991	0.3876	0.0668	1.1063	0.0098	0.0007	0.0068
Used an inhaler for chest within last hour	0	ukbb	European	0.0371	0.0719	0.5165	0.6055	0.0043	0.0016	1.0023	0.0064	0.0127	0.0051
Non-cancer illness code_ self-reported: arthritis (nos)	0	ukbb	European	0.0646	0.1255	0.515	0.6066	0.0017	0.0014	1.0154	0.0064	-0.0067	0.0063
Diagnoses - main ICD10: B37 Candidiasis	0	ukbb	European	-0.4485	0.872	-0.5144	0.607	0.0006	0.0014	1.0016	0.0065	0.0084	0.0057
Diagnoses - main ICD10: E04 Other non-toxic goitre	0	ukbb	European	0.0335	0.0661	0.5069	0.6123	0.0053	0.0013	0.9921	0.0062	-0.0004	0.0054
Diagnoses - main ICD10: R14 Flatulence and related conditions	0	ukbb	European	-0.0404	0.0804	-0.5018	0.6158	0.0032	0.0013	0.9923	0.0067	-0.0029	0.0054
Illnesses of siblings: None of the above (group 2)	0	ukbb	European	-0.0308	0.062	-0.4974	0.6189	0.0089	0.0018	1.003	0.0068	5.1806e-05	0.0055
Non-cancer illness code_ self-reported: polio / poliomyelitis	0	ukbb	European	0.0457	0.0923	0.4948	0.6207	0.0027	0.0013	0.9922	0.0064	-0.0049	0.0051
Cancer code_ self-reported: breast cancer	0	ukbb	European	-0.0235	0.049	-0.4803	0.631	0.0098	0.0018	1.0189	0.0079	-0.005	0.0053
Cancer code_ self-reported: lung cancer	0	ukbb	European	0.2771	0.5836	0.4748	0.6349	0.0004	0.0012	0.9928	0.0065	0.0017	0.0054
Number of depression episodes	0	ukbb	European	-0.0384	0.0817	-0.4705	0.638	0.0324	0.0119	1.0044	0.0062	-0.0141	0.006
Heel bone mineral density (BMD) T-score_ automated	0	ukbb	European	-0.0116	0.0248	-0.4671	0.6404	0.2945	0.0338	1.0852	0.0346	0.0102	0.0084
Citrate	27005778	metabolites	European	0.032	0.0691	0.4632	0.6432	0.0708	0.0209	1.0118	0.0075	-0.0081	0.0053
Eye problems/disorders: Injury or trauma resulting in loss of vision	0	ukbb	European	0.6013	1.3119	0.4583	0.6467	0.0012	0.004	1.0103	0.0063	0.0008	0.0055
Fractured bone site(s): Wrist	0	ukbb	European	-0.0267	0.0623	-0.4286	0.6682	0.0065	0.0016	1.0084	0.0069	0.0034	0.0057
Target heart rate achieved	0	ukbb	European	0.0306	0.0731	0.419	0.6752	0.0336	0.0105	1.0067	0.0069	0.0054	0.0058
Non-cancer illness code_ self-reported: osteoporosis	0	ukbb	European	0.0212	0.0523	0.4048	0.6856	0.0149	0.0019	1.0002	0.0075	-0.0205	0.0069
Hair/balding pattern: Pattern 4	0	ukbb	European	-0.0103	0.0258	-0.3997	0.6894	0.1677	0.0197	1.0981	0.0242	0.0023	0.0069
Heel bone mineral density (BMD) T-score_ automated (right)	0	ukbb	European	-0.0115	0.0292	-0.3932	0.6941	0.3015	0.0365	1.0316	0.0222	0.0123	0.0078
Diagnoses - main ICD10: K51 Ulcerative colitis	0	ukbb	European	0.0258	0.0692	0.3726	0.7094	0.0047	0.0016	1.013	0.0067	-0.0136	0.0055
Illnesses of siblings: Stroke	0	ukbb	European	0.0308	0.0857	0.3599	0.7189	0.0043	0.0018	1.008	0.0063	0.0168	0.0052
Non-cancer illness code_ self-reported: hypertrophic cardiomyopathy (hcm / hocm)	0	ukbb	European	-0.0447	0.1318	-0.3388	0.7347	0.0015	0.0013	1.0017	0.0066	-0.001	0.0058
Diagnoses - main ICD10: I48 Atrial fibrillation and flutter	0	ukbb	European	0.0143	0.0437	0.3277	0.7431	0.0128	0.0021	1.0109	0.0079	-0.0033	0.0056
Mouth/teeth dental problems: Painful gums	0	ukbb	European	0.0177	0.0541	0.327	0.7437	0.0069	0.0015	1.0046	0.0063	0.0021	0.0056
Why reduced smoking: Illness or ill health	0	ukbb	European	0.0272	0.088	0.309	0.7574	0.1082	0.0429	0.9984	0.0064	0.0007	0.0056
Cancer diagnosed by doctor	0	ukbb	European	0.0192	0.0632	0.3035	0.7615	0.0066	0.0015	1.0101	0.0064	-0.0047	0.0057
Non-cancer illness code_ self-reported: psoriasis	0	ukbb	European	0.0195	0.065	0.3002	0.764	0.0069	0.0015	1.0157	0.0079	0.0061	0.0059
Diagnoses - main ICD10: M16 Coxarthrosis [arthrosis of hip]	0	ukbb	European	-0.0152	0.0515	-0.2956	0.7675	0.0107	0.0017	1.0104	0.008	0.0093	0.0057
Primary biliary cirrhosis	26394269	autoimmune	European	-0.0132	0.0456	-0.2904	0.7715	0.3757	0.0636	1.0037	0.0099	0.0088	0.0065
Diagnoses - main ICD10: M21 Other acquired deformities of limbs	0	ukbb	European	-0.2148	0.7467	-0.2877	0.7736	0.0003	0.0012	1.0081	0.0067	0.0113	0.0053
Non-cancer illness code_ self-reported: enlarged prostate	0	ukbb	European	-0.0156	0.0565	-0.2759	0.7826	0.0062	0.0015	1.0042	0.0064	0.0061	0.0053
Diagnoses - main ICD10: R55 Syncope and collapse	0	ukbb	European	-0.02	0.0743	-0.2688	0.7881	0.0054	0.0014	1.0081	0.007	-0.0003	0.0061
Illnesses of mother: High blood pressure	0	ukbb	European	-0.0102	0.0385	-0.2663	0.79	0.0295	0.0022	1.018	0.0086	-0.0034	0.0064
Ever taken oral contraceptive pill	0	ukbb	European	0.0145	0.0548	0.2654	0.7907	0.0194	0.0028	1.0115	0.0069	-0.0006	0.0062
Diagnoses - main ICD10: M20 Acquired deformities of fingers and toes	0	ukbb	European	0.0135	0.0555	0.2428	0.8081	0.0094	0.0015	1.0005	0.0072	0.0006	0.0064
Diagnoses - main ICD10: C61 Malignant neoplasm of prostate	0	ukbb	European	-0.0178	0.0742	-0.2403	0.8101	0.0043	0.0015	1.0186	0.0067	0.0037	0.0056
Doctor diagnosed asthma	0	ukbb	European	0.0091	0.0383	0.2373	0.8124	0.0691	0.0096	0.999	0.0078	-0.0016	0.0058
Ulcerative colitis	26192919	autoimmune	European	-0.0088	0.0381	-0.2323	0.8163	0.2573	0.0315	1.0479	0.0096	0.0095	0.0052
Diagnoses - main ICD10: S66 Injury of muscle and tendon at wrist and hand level	0	ukbb	European	-0.0247	0.1087	-0.2273	0.8202	0.0023	0.0012	0.9996	0.0065	0.0113	0.0053
Tinnitus: Yes_ now most or all of the time	0	ukbb	European	0.0097	0.0479	0.2031	0.8391	0.0334	0.0047	1.0016	0.0067	-0.0029	0.0054
Illness_ injury_ bereavement_ stress in last 2 years: Serious illness_ injury or assault of a close relative	0	ukbb	European	-0.0105	0.0525	-0.1995	0.8419	0.0111	0.0017	1.0106	0.007	-0.0072	0.0055
Non-cancer illness code_ self-reported: uterine fibroids	0	ukbb	European	0.0117	0.0607	0.1927	0.8472	0.007	0.0014	1.0078	0.0067	0.0014	0.0057
Pulse wave reflection index	0	ukbb	European	0.0078	0.0413	0.1882	0.8507	0.0547	0.0053	1.0081	0.0074	-0.0023	0.0062
Number of days/week of vigorous physical activity 10+ minutes	0	ukbb	European	-0.0051	0.0311	-0.1631	0.8704	0.0379	0.0024	1.0156	0.0083	-0.0353	0.0064
Non-cancer illness code_ self-reported: bone disorder	0	ukbb	European	0.0188	0.1159	0.1621	0.8712	0.0018	0.0012	1.0038	0.0061	-0.0067	0.0056
Fractured bone site(s): Arm	0	ukbb	European	-0.0113	0.0757	-0.1494	0.8813	0.0052	0.0015	0.9967	0.0069	0.0003	0.006
Diagnoses - main ICD10: N19 Unspecified renal failure	0	ukbb	European	-0.0134	0.0898	-0.1491	0.8814	0.003	0.0014	0.999	0.0068	0.0003	0.0058
Number of days/week walked 10+ minutes	0	ukbb	European	0.0044	0.0303	0.1458	0.8841	0.0423	0.0023	1.0097	0.0075	-0.0067	0.0064
Father still alive	0	ukbb	European	-0.009	0.0642	-0.1404	0.8884	0.0064	0.0015	1.0165	0.0065	-0.0089	0.0054
22:6 docosahexaenoic acid	27005778	metabolites	European	-0.008	0.0588	-0.1357	0.8921	0.1314	0.0365	0.9957	0.0072	-0.0065	0.0051
Risk taking	0	ukbb	European	-0.0041	0.0306	-0.1327	0.8944	0.0556	0.0028	1.0047	0.0088	0.0012	0.0065
Diagnoses - main ICD10: J33 Nasal polyp	0	ukbb	European	-0.0096	0.0775	-0.1241	0.9012	0.0032	0.0015	1.0072	0.0072	0.0113	0.0053
Diagnoses - main ICD10: K76 Other diseases of liver	0	ukbb	European	0.011	0.0892	0.1236	0.9017	0.0037	0.0013	0.9928	0.0062	0.0015	0.0058
Diagnoses - main ICD10: S09 Other and unspecified injuries of head	0	ukbb	European	0.0097	0.0801	0.1217	0.9032	0.0039	0.0015	0.9943	0.0064	0.0079	0.0059
Free cholesterol in medium HDL	27005778	metabolites	European	-0.0087	0.0742	-0.1173	0.9066	0.0656	0.0232	0.9984	0.0083	-0.0068	0.0057
Non-cancer illness code_ self-reported: pneumothorax	0	ukbb	European	0.0088	0.0805	0.1098	0.9125	0.0029	0.0014	0.9884	0.007	-0.005	0.0054
Length of menstrual cycle	0	ukbb	European	-0.0063	0.0575	-0.1091	0.9131	0.1034	0.0205	0.9987	0.0069	-0.0069	0.0058
Number of self-reported cancers	0	ukbb	European	0.0066	0.062	0.1067	0.915	0.0065	0.0015	1.0135	0.0065	-0.0077	0.0058
Non-cancer illness code_ self-reported: rheumatoid arthritis	0	ukbb	European	0.0073	0.0774	0.0948	0.9245	0.0048	0.0014	1.0034	0.0062	0.017	0.0059
Difference in height between childhood and adulthood; age 8	23449627	anthropometric	European	-0.0043	0.0503	-0.0864	0.9312	0.3386	0.0506	0.971	0.0077	0.0082	0.0059
Non-cancer illness code_ self-reported: vaginal prolapse/uterine prolapse	0	ukbb	European	-0.0061	0.0741	-0.082	0.9347	0.0047	0.0015	1.006	0.0067	-0.006	0.0057
Diagnoses - main ICD10: H25 Senile cataract	0	ukbb	European	-0.0066	0.0916	-0.0721	0.9425	0.0034	0.0014	1.0128	0.007	0.0052	0.0057
Diagnoses - main ICD10: Z80 Family history of malignant neoplasm	0	ukbb	European	0.0085	0.1305	0.0649	0.9482	0.0013	0.0013	0.9907	0.006	-0.0014	0.0054
Headaches for 3+ months	0	ukbb	European	0.0033	0.0515	0.0642	0.9488	0.0555	0.0074	1.007	0.0065	-0.011	0.0059
Nervous feelings	0	ukbb	European	0.0021	0.0324	0.0633	0.9495	0.0661	0.0039	1.0144	0.0123	-0.0212	0.0071
Extreme height	23563607	anthropometric	European	0.0021	0.035	0.0595	0.9525	1.2278	0.1076	1.0373	0.0176	-0.0252	0.0101
Diagnoses - main ICD10: I80 Phlebitis and thrombophlebitis	0	ukbb	European	-0.0025	0.0597	-0.0417	0.9667	0.008	0.0017	0.9942	0.0084	0.0079	0.0057
Child birth length	25281659	anthropometric	European	-0.002	0.0531	-0.0378	0.9699	0.1701	0.0233	0.9924	0.0071	-0.0065	0.0061
Guilty feelings	0	ukbb	European	0.001	0.0301	0.0318	0.9747	0.0512	0.0027	1.0077	0.0086	-0.0098	0.0067
Diagnoses - main ICD10: K35 Acute appendicitis	0	ukbb	European	0.0024	0.1127	0.0216	0.9828	0.0023	0.0013	1.0043	0.0067	-0.0039	0.0056
rg: genetic correlation estimate; se: standard error; z: Z score; p: P-value for genetic correlation; h2_obs: SNP heritability; h2_obs_se: standard error of the SNP heritability.
