# Supplementary material for: GWAS for urinary sodium and potassium excretion highlights pathways shared with cardiovascular traits
Source: Nat Commun. 2019 Aug 13;10:3653. doi: 10.1038/s41467-019-11451-y (PMC6692500; doi:10.1038/s41467-019-11451-y)
Supplement: Supplementary file 14 — Supplementary Dataset 14 [file 41467_2019_11451_MOESM14_ESM.xlsx]

## Sheet: Supplementary Data 14
Supplementary Data 14: LD score regression between urinary potassium and other traits.
Trait	PMID	Category	ethnicity	rg	se	z	p	h2_obs	h2_obs_se	h2_int	h2_int_se	gcov_int	gcov_int_se
Creatinine (enzymatic) in urine	0	ukbb	European	0.7949	0.0143	55.6758	0	0.0662	0.003	1.0185	0.0096	0.6492	0.0083
Potassium in urine	0	ukbb	European	0.9876	0.0056	177.573	0	0.0425	0.0023	1.017	0.0085	0.8595	0.0087
Sodium in urine	0	ukbb	European	0.5211	0.0236	22.1128	2.38e-108	0.0716	0.0031	1.027	0.0099	0.3742	0.0068
Trunk fat mass	0	ukbb	European	0.2711	0.0224	12.0789	1.37e-33	0.2323	0.008	1.0823	0.0191	0.0845	0.007
Weight	0	ukbb	European	0.2751	0.0232	11.8656	1.79e-32	0.2663	0.0098	1.0912	0.0228	0.1151	0.0082
Whole body fat mass	0	ukbb	European	0.2577	0.0232	11.1023	1.22e-28	0.2353	0.0081	1.0772	0.0191	0.0922	0.0073
Basal metabolic rate	0	ukbb	European	0.2566	0.0237	10.8219	2.71e-27	0.2857	0.0117	1.124	0.0285	0.1145	0.0086
Arm fat-free mass (left)	0	ukbb	European	0.2561	0.0238	10.7501	5.92e-27	0.2666	0.0108	1.1163	0.0268	0.1169	0.0086
Arm predicted mass (left)	0	ukbb	European	0.2558	0.024	10.6636	1.51e-26	0.266	0.0108	1.1181	0.0272	0.1173	0.0086
Waist circumference	0	ukbb	European	0.2456	0.0232	10.6003	2.97e-26	0.2014	0.0073	1.0644	0.0178	0.0897	0.0071
Arm fat-free mass (right)	0	ukbb	European	0.2499	0.0239	10.4549	1.39e-25	0.2677	0.011	1.1105	0.0276	0.117	0.0085
Arm predicted mass (right)	0	ukbb	European	0.2487	0.0238	10.4484	1.49e-25	0.2666	0.011	1.1118	0.0279	0.1171	0.0085
Whole body fat-free mass	0	ukbb	European	0.2437	0.0237	10.2867	8.09e-25	0.2904	0.0123	1.1375	0.0306	0.1106	0.0087
Whole body water mass	0	ukbb	European	0.2424	0.0237	10.2215	1.59e-24	0.2904	0.0123	1.1369	0.0305	0.1107	0.0087
Leg fat-free mass (left)	0	ukbb	European	0.2446	0.0243	10.0697	7.52e-24	0.2673	0.0108	1.1134	0.0263	0.1044	0.0085
Leg predicted mass (left)	0	ukbb	European	0.2442	0.0243	10.054	8.82e-24	0.267	0.0108	1.1132	0.0262	0.1043	0.0084
Leg fat mass (left)	0	ukbb	European	0.2453	0.0247	9.9508	2.5e-23	0.2327	0.0079	1.0734	0.0188	0.0977	0.0077
Trunk fat percentage	0	ukbb	European	0.2282	0.023	9.9122	3.69e-23	0.2076	0.0073	1.0864	0.0177	0.0595	0.0067
Trunk predicted mass	0	ukbb	European	0.2335	0.0236	9.8823	4.97e-23	0.2867	0.0129	1.1444	0.032	0.1067	0.0088
Leg fat-free mass (right)	0	ukbb	European	0.2418	0.0245	9.8774	5.22e-23	0.2653	0.0107	1.121	0.0268	0.1005	0.0085
Leg predicted mass (right)	0	ukbb	European	0.242	0.0245	9.8687	5.69e-23	0.265	0.0107	1.1206	0.0268	0.1004	0.0085
Trunk fat-free mass	0	ukbb	European	0.2326	0.0236	9.8385	7.69e-23	0.2882	0.0129	1.1453	0.0322	0.1072	0.0088
Leg fat mass (right)	0	ukbb	European	0.2404	0.0247	9.7342	2.15e-22	0.2315	0.0079	1.0727	0.0186	0.097	0.0077
Arm fat mass (left)	0	ukbb	European	0.237	0.0246	9.6422	5.3e-22	0.2325	0.0083	1.0707	0.0189	0.096	0.0075
Hip circumference	0	ukbb	European	0.2284	0.0239	9.542	1.4e-21	0.2188	0.0085	1.0832	0.0199	0.1018	0.0072
Arm fat mass (right)	0	ukbb	European	0.235	0.0247	9.5107	1.89e-21	0.232	0.0083	1.0736	0.019	0.0952	0.0076
Body fat percentage	0	ukbb	European	0.2112	0.0239	8.8427	9.34e-19	0.2174	0.0072	1.085	0.0179	0.0673	0.0069
Standing height	0	ukbb	European	0.1951	0.0225	8.6579	4.8e-18	0.4539	0.0238	1.2667	0.0598	0.0486	0.01
Sitting height	0	ukbb	European	0.1955	0.0227	8.6097	7.33e-18	0.3238	0.0187	1.1474	0.0438	0.0615	0.0088
Height_2010	20881960	anthropometric	European	0.2222	0.0262	8.4678	2.5011e-17	0.2863	0.017	1.0228	0.0173	-0.002	0.0068
Leg fat percentage (left)	0	ukbb	European	0.1985	0.0257	7.7309	1.07e-14	0.2087	0.0065	1.0858	0.0172	0.0713	0.0074
Comparative height size at age 10	0	ukbb	European	0.1837	0.024	7.6651	1.79e-14	0.244	0.0129	1.1242	0.0347	0.0354	0.0075
Hip circumference	25673412	anthropometric	European	0.2254	0.0306	7.3588	1.8559e-13	0.1276	0.0056	0.8622	0.0084	0.0092	0.0056
Leg fat percentage (right)	0	ukbb	European	0.187	0.0257	7.2787	3.37e-13	0.2087	0.0066	1.0829	0.0171	0.0721	0.0074
Arm fat percentage (left)	0	ukbb	European	0.1815	0.0253	7.1687	7.57e-13	0.2199	0.0076	1.0765	0.0184	0.0689	0.0071
Arm fat percentage (right)	0	ukbb	European	0.182	0.0255	7.1414	9.24e-13	0.2164	0.0074	1.0813	0.0184	0.0658	0.0073
Body mass index (BMI)	0	ukbb	European	0.1792	0.0265	6.7702	1.29e-11	0.2485	0.0086	1.0759	0.0201	0.0994	0.0078
Waist circumference	25673412	anthropometric	European	0.2033	0.0317	6.4124	1.4326e-10	0.122	0.005	0.8458	0.0084	0.0084	0.006
Extreme height	23563607	anthropometric	European	0.2303	0.0404	5.7052	1.1619e-08	1.2235	0.1057	1.0405	0.0178	-0.0044	0.0097
Mineral and other dietary supplements: None of the above	0	ukbb	European	0.2275	0.0423	5.3784	7.52e-08	0.0302	0.0021	1.0093	0.008	0.0115	0.0059
Forced expiratory volume in 1-second (FEV1)_ predicted	0	ukbb	European	0.1765	0.0331	5.3391	9.34e-08	0.1718	0.0128	1.0437	0.0123	0.0135	0.006
Usual walking pace	0	ukbb	European	-0.1333	0.0267	-4.9949	5.89e-07	0.0778	0.0028	1.0264	0.0097	-0.0246	0.0062
Time spent watching television (TV)	0	ukbb	European	0.1293	0.0266	4.853	1.22e-06	0.099	0.0039	1.0591	0.011	0.0136	0.0064
Frequency of stair climbing in last 4 weeks	0	ukbb	European	-0.1658	0.035	-4.7309	2.24e-06	0.0349	0.0022	1.0182	0.0077	-0.007	0.0061
Vitamin and mineral supplements: None of the above	0	ukbb	European	0.1851	0.0424	4.3634	1.28e-05	0.03	0.0018	0.9971	0.0071	0.0307	0.006
Mineral and other dietary supplements: Fish oil (including cod liver oil)	0	ukbb	European	-0.1882	0.0449	-4.1926	2.76e-05	0.0273	0.0019	1.0059	0.0078	-0.0161	0.0059
Snoring	0	ukbb	European	-0.1275	0.0305	-4.181	2.9e-05	0.0587	0.0028	1.0265	0.009	-0.0355	0.0057
Systolic blood pressure_ automated reading	0	ukbb	European	-0.1199	0.0287	-4.1695	3.05e-05	0.1293	0.0055	1.0683	0.0155	-0.0546	0.0074
Vitamin and mineral supplements: Multivitamins +/- minerals	0	ukbb	European	-0.1806	0.0453	-3.9877	6.67e-05	0.0236	0.0018	1.008	0.0078	-0.0197	0.006
Weight change compared with 1 year ago	0	ukbb	European	0.2283	0.0578	3.9518	7.76e-05	0.0086	0.0014	1.0225	0.0062	0.0006	0.0053
Types of physical activity in last 4 weeks: Heavy DIY (eg: weeding_ lawn mowing_ carpentry_ digging)	0	ukbb	European	-0.141	0.0357	-3.9433	8.04e-05	0.0337	0.0022	1.0073	0.0078	0.0065	0.0058
Obesity class 1	23563607	anthropometric	European	0.131	0.0335	3.9129	9.1198e-05	0.2205	0.0117	1.0148	0.0109	0.0058	0.007
Body mass index	20935630	anthropometric	European	0.1266	0.0327	3.8756	0.0001	0.1932	0.0093	1.0075	0.0107	0.0104	0.0064
Pulse wave Arterial Stiffness index	0	ukbb	European	0.2116	0.0546	3.8736	0.0001	0.0383	0.0053	1.0086	0.0073	0.0217	0.0056
Diagnoses - main ICD10: N20 Calculus of kidney and ureter	0	ukbb	European	0.2631	0.0695	3.7827	0.0002	0.008	0.0014	1.0079	0.0067	-0.0012	0.0053
Waist-to-hip ratio	25673412	anthropometric	European	0.1138	0.0312	3.644	0.0003	0.1144	0.0068	0.9213	0.0088	0.003	0.0058
Average weekly champagne plus white wine intake	0	ukbb	European	0.1533	0.0427	3.5906	0.0003	0.0306	0.0027	1.0407	0.008	0.0277	0.0059
Impedance of arm (right)	0	ukbb	European	-0.0946	0.026	-3.6354	0.0003	0.2398	0.0088	1.0834	0.0224	-0.097	0.008
Light smokers_ at least 100 smokes in lifetime	0	ukbb	European	0.1557	0.0442	3.521	0.0004	0.0768	0.0083	1.0044	0.0077	0.0062	0.0057
Smoking status: Previous	0	ukbb	European	0.1228	0.0349	3.5143	0.0004	0.052	0.003	1.0195	0.0099	0.0215	0.0067
Target heart rate achieved	0	ukbb	European	-0.3003	0.0864	-3.4733	0.0005	0.0335	0.0106	1.0092	0.0069	-0.0092	0.0053
Impedance of leg (right)	0	ukbb	European	-0.0915	0.0262	-3.4885	0.0005	0.2422	0.0097	1.0961	0.0231	-0.0732	0.008
Impedance of arm (left)	0	ukbb	European	-0.09	0.0257	-3.5008	0.0005	0.2362	0.0088	1.0992	0.0218	-0.0944	0.008
Impedance of whole body	0	ukbb	European	-0.0902	0.0261	-3.4512	0.0006	0.2608	0.0102	1.0921	0.023	-0.0934	0.0081
Illnesses of father: High blood pressure	0	ukbb	European	-0.1589	0.0467	-3.4034	0.0007	0.0195	0.0019	1.0148	0.0076	-0.0017	0.0054
Mineral and other dietary supplements: Glucosamine	0	ukbb	European	-0.1265	0.038	-3.3244	0.0009	0.0249	0.002	1.0071	0.0078	0.0144	0.0055
Past tobacco smoking	0	ukbb	European	-0.105	0.0319	-3.2923	0.001	0.0917	0.0041	1.02	0.0106	-0.0206	0.0071
Blood clot_ DVT_ bronchitis_ emphysema_ asthma_ rhinitis_ eczema_ allergy diagnosed by doctor: Hayfever_ allergic rhinitis or eczema	0	ukbb	European	-0.0983	0.0298	-3.3026	0.001	0.0726	0.006	1.0449	0.0166	-0.0046	0.0069
Qualifications: College or University degree	0	ukbb	European	-0.0726	0.0222	-3.2755	0.0011	0.1671	0.0053	1.1239	0.0142	0.0283	0.0064
HOMA-IR	20081858	glycemic	European	0.2553	0.0796	3.2053	0.0013	0.0697	0.0135	1.0033	0.0068	-0.0101	0.0059
Ever vs never smoked	20418890	smoking_behaviour	European	0.1311	0.0408	3.2103	0.0013	0.0763	0.0069	0.9965	0.0059	-0.0076	0.0045
Transport type for commuting to job workplace: Walk	0	ukbb	European	-0.1989	0.0622	-3.1972	0.0014	0.0165	0.003	1.0035	0.0067	0.009	0.0055
Average weekly spirits intake	0	ukbb	European	0.1264	0.0398	3.1727	0.0015	0.0323	0.0028	1.0168	0.008	0.0224	0.0054
Shortness of breath walking on level ground	0	ukbb	European	0.1419	0.0446	3.1812	0.0015	0.0498	0.0053	1.0071	0.0066	0.0117	0.0049
Illnesses of siblings: High blood pressure	0	ukbb	European	-0.1232	0.0388	-3.1745	0.0015	0.0375	0.0026	1.0053	0.0079	0.0021	0.0055
Types of physical activity in last 4 weeks: Light DIY (eg: pruning_ watering the lawn)	0	ukbb	European	-0.1057	0.0337	-3.1322	0.0017	0.0389	0.0024	1.0053	0.0088	0.0048	0.006
Overweight	23563607	anthropometric	European	0.1185	0.038	3.1201	0.0018	0.1101	0.0067	1.0239	0.0094	0.0069	0.0066
Impedance of leg (left)	0	ukbb	European	-0.0814	0.0264	-3.0823	0.0021	0.2429	0.0098	1.0852	0.0232	-0.0772	0.0081
HOMA-B	20081858	glycemic	European	0.2164	0.0709	3.0529	0.0023	0.0889	0.015	0.9894	0.0071	-0.0074	0.0061
Obesity class 2	23563607	anthropometric	European	0.1235	0.0407	3.0319	0.0024	0.1882	0.0122	1	0.0096	0.0108	0.0075
Ever smoked	0	ukbb	European	0.0968	0.0322	3.009	0.0026	0.0756	0.0035	1.0225	0.0108	0.0097	0.007
Fasting insulin main effect	22581228	glycemic	European	0.1777	0.0604	2.9401	0.0033	0.069	0.0102	1.016	0.007	-0.0012	0.0055
Obesity class 3	23563607	anthropometric	European	0.1434	0.0487	2.9426	0.0033	0.1264	0.0142	0.979	0.0093	0.0022	0.0071
Frequency of light DIY in last 4 weeks	0	ukbb	European	-0.1524	0.0522	-2.9215	0.0035	0.0216	0.0031	1.0058	0.007	0.0029	0.0053
Tobacco smoking: Ex-smoker	0	ukbb	European	0.1691	0.0579	2.9227	0.0035	0.0761	0.0083	1.0101	0.0079	0.0093	0.0064
Non-cancer illness code_ self-reported: kidney stone/ureter stone/bladder stone	0	ukbb	European	0.1864	0.064	2.911	0.0036	0.0092	0.0016	1.0011	0.0079	-0.008	0.0056
Illnesses of mother: High blood pressure	0	ukbb	European	-0.1309	0.0451	-2.9049	0.0037	0.0303	0.0021	1.0169	0.008	-0.0114	0.0061
Qualifications: None of the above	0	ukbb	European	0.0702	0.0249	2.8205	0.0048	0.0962	0.0038	1.0718	0.0121	-0.0283	0.0062
Number of full sisters	0	ukbb	European	-0.1397	0.0501	-2.7898	0.0053	0.0185	0.0018	1.041	0.0069	-0.0194	0.0058
Father still alive	0	ukbb	European	-0.2153	0.0775	-2.7792	0.0054	0.006	0.0015	1.0184	0.0068	-0.0006	0.0054
Maximum workload during fitness test	0	ukbb	European	0.2089	0.075	2.7847	0.0054	0.0418	0.0104	1.0085	0.0069	0.0091	0.005
Types of transport used (excluding work): Walk	0	ukbb	European	-0.1196	0.044	-2.7204	0.0065	0.0335	0.0023	1.0341	0.0088	-0.0108	0.007
Duration of fitness test	0	ukbb	European	0.2869	0.106	2.7065	0.0068	0.0217	0.0092	1.0049	0.0064	-0.0021	0.0054
Non-cancer illness code_ self-reported: varicose veins	0	ukbb	European	-0.228	0.0844	-2.7028	0.0069	0.0044	0.0014	1.0111	0.0063	-0.003	0.0046
Blood clot_ DVT_ bronchitis_ emphysema_ asthma_ rhinitis_ eczema_ allergy diagnosed by doctor: None of the above	0	ukbb	European	0.082	0.0304	2.6994	0.0069	0.0764	0.0068	1.0399	0.0184	-0.0015	0.0067
Transport type for commuting to job workplace: Car/motor vehicle	0	ukbb	European	0.1278	0.0478	2.6729	0.0075	0.0243	0.003	1.0227	0.007	-0.0112	0.0053
Forced vital capacity (FVC)_ Best measure	0	ukbb	European	0.0733	0.0279	2.6241	0.0087	0.1901	0.0088	1.0829	0.0175	0.0169	0.0079
Nap during day	0	ukbb	European	0.0681	0.026	2.6195	0.0088	0.0809	0.0034	1.0223	0.0104	0.0024	0.006
Forced vital capacity (FVC)	0	ukbb	European	0.0736	0.0283	2.5972	0.0094	0.1713	0.0078	1.0965	0.0177	0.0197	0.0081
Irritability	0	ukbb	European	0.0987	0.0381	2.5913	0.0096	0.0682	0.0041	0.9917	0.0109	0.0027	0.0074
Age of smoking initiation	20418890	smoking_behaviour	European	-0.2435	0.0945	-2.578	0.0099	0.0636	0.0176	0.9986	0.0062	0.0094	0.0055
Cancer code_ self-reported: malignant melanoma	0	ukbb	European	0.2169	0.0854	2.5403	0.0111	0.0057	0.0016	0.9913	0.006	-0.0151	0.0061
Had menopause	0	ukbb	European	0.1615	0.0638	2.5308	0.0114	0.0204	0.0041	1.0058	0.0068	-0.0064	0.0053
Time spent driving	0	ukbb	European	0.1027	0.0407	2.5235	0.0116	0.0424	0.0028	1.0006	0.0068	0.0124	0.0057
Doctor diagnosed asthma	0	ukbb	European	-0.1082	0.0429	-2.5215	0.0117	0.0704	0.0097	0.9978	0.008	0.0043	0.0052
Getting up in morning	0	ukbb	European	0.0708	0.0283	2.5061	0.0122	0.0685	0.0032	1.04	0.0108	-0.0081	0.0062
Vascular/heart problems diagnosed by doctor: Heart attack	0	ukbb	European	0.1205	0.0483	2.4979	0.0125	0.0193	0.0018	1.011	0.0077	-0.011	0.0056
Non-cancer illness code_ self-reported: heart attack/myocardial infarction	0	ukbb	European	0.1179	0.0473	2.4895	0.0128	0.0197	0.0018	1.0094	0.0076	-0.0108	0.0055
Home area population density - urban or rural: Scotland - Large Urban Area	0	ukbb	European	-0.2067	0.0832	-2.485	0.013	0.0114	0.0032	2.1382	0.0149	0.0534	0.0082
Diagnoses - main ICD10: I25 Chronic ischaemic heart disease	0	ukbb	European	0.1188	0.048	2.4776	0.0132	0.0203	0.0024	1.0196	0.008	-0.0105	0.0054
Risk taking	0	ukbb	European	0.0821	0.0338	2.4304	0.0151	0.0563	0.0029	1.0049	0.0091	0.01	0.0064
Time spent using computer	0	ukbb	European	0.0605	0.0249	2.4274	0.0152	0.096	0.0042	1.0452	0.0098	0.0197	0.0055
Types of physical activity in last 4 weeks: Strenuous sports	0	ukbb	European	-0.1035	0.043	-2.4054	0.0162	0.0217	0.0018	1.0114	0.0068	0.0021	0.0056
Non-cancer illness code_ self-reported: hayfever/allergic rhinitis	0	ukbb	European	-0.1085	0.0453	-2.3939	0.0167	0.0231	0.0025	1.0187	0.0091	-0.005	0.0062
Alcohol intake versus 10 years previously	0	ukbb	European	0.0823	0.0345	2.385	0.0171	0.0347	0.0024	1.0298	0.0086	-0.0302	0.0055
Reason for glasses/contact lenses: For just reading/near work as you are getting older (called presbyopia)	0	ukbb	European	0.2993	0.1256	2.3823	0.0172	0.0036	0.0017	1.1371	0.0083	-0.0558	0.0056
Medication for pain relief_ constipation_ heartburn: Ibuprofen (e.g. Nurofen)	0	ukbb	European	0.112	0.0471	2.3778	0.0174	0.0227	0.0017	0.996	0.0069	-0.0008	0.0063
Number of live births	0	ukbb	European	-0.0837	0.0356	-2.3483	0.0189	0.0608	0.0042	1.008	0.0078	-0.0085	0.0062
Qualifications: Other professional qualifications eg: nursing_ teaching	0	ukbb	European	-0.0704	0.0301	-2.3438	0.0191	0.0475	0.0024	1.0244	0.0089	0.0134	0.0057
Ever used hormone-replacement therapy (HRT)	0	ukbb	European	0.0901	0.0387	2.3275	0.0199	0.0412	0.0033	0.9982	0.0068	-0.0014	0.0056
Diagnoses - main ICD10: I83 Varicose veins of lower extremities	0	ukbb	European	-0.1231	0.0531	-2.3193	0.0204	0.02	0.0024	1.0332	0.012	0.0145	0.0058
Illnesses of father: None of the above (group 1)	0	ukbb	European	0.1364	0.0588	2.3177	0.0205	0.015	0.0019	1.0227	0.0072	-0.01	0.0058
Job involves shift work	0	ukbb	European	0.1026	0.0444	2.311	0.0208	0.0304	0.0028	1.0024	0.0064	-0.0055	0.0053
Non-cancer illness code_ self-reported: cholelithiasis/gall stones	0	ukbb	European	0.1486	0.0646	2.2997	0.0215	0.0083	0.0017	1.0207	0.0079	-0.0055	0.0057
Pulse wave peak to peak time	0	ukbb	European	-0.124	0.0543	-2.2844	0.0223	0.0391	0.005	1.01	0.0072	-0.0188	0.0055
Duration of light DIY	0	ukbb	European	-0.0971	0.0426	-2.2817	0.0225	0.035	0.0034	1.0043	0.0073	-0.0004	0.0056
Overall health rating	0	ukbb	European	0.0665	0.0295	2.2572	0.024	0.0993	0.0032	1.0632	0.0112	0.0018	0.0068
Mouth/teeth dental problems: Bleeding gums	0	ukbb	European	0.1177	0.0525	2.2409	0.025	0.0225	0.0019	1.0126	0.0078	0.0141	0.0063
Non-cancer illness code_ self-reported: enlarged prostate	0	ukbb	European	0.1689	0.0754	2.2393	0.0251	0.0065	0.0015	1.0029	0.0062	-0.0028	0.0057
Birth weight of first child	0	ukbb	European	0.0735	0.0328	2.2381	0.0252	0.1101	0.0067	1.0237	0.0092	0.0138	0.0063
Illness_ injury_ bereavement_ stress in last 2 years: Serious illness_ injury or assault to yourself	0	ukbb	European	0.1194	0.0534	2.2381	0.0252	0.0142	0.0016	1.0114	0.0069	-0.0095	0.0055
Qualifications: A levels/AS levels or equivalent	0	ukbb	European	-0.0595	0.0267	-2.2272	0.0259	0.0961	0.0037	1.0571	0.0112	0.0112	0.0063
Pulse wave reflection index	0	ukbb	European	0.0995	0.0449	2.2142	0.0268	0.0551	0.0058	1.0101	0.0076	0.0106	0.0058
Chest pain or discomfort walking normally	0	ukbb	European	0.1308	0.0593	2.2047	0.0275	0.0764	0.0099	1.0084	0.0074	-0.0069	0.0053
Reason for glasses/contact lenses: For long-sightedness_ i.e. for distance and near_ but particularly for near tasks like reading (called hypermetropia)	0	ukbb	European	0.1345	0.0611	2.1996	0.0278	0.0099	0.0016	1.0652	0.0077	-0.0438	0.0051
Illness_ injury_ bereavement_ stress in last 2 years: None of the above	0	ukbb	European	-0.0884	0.0403	-2.1957	0.0281	0.0225	0.0017	1.0134	0.0068	0.0045	0.0058
Illness_ injury_ bereavement_ stress in last 2 years: Financial difficulties	0	ukbb	European	0.0824	0.0376	2.1898	0.0285	0.0327	0.0022	1.0286	0.0086	0.0015	0.0059
Difficulty not smoking for 1 day	0	ukbb	European	-0.1502	0.0695	-2.1613	0.0307	0.1092	0.0233	0.99	0.0071	-0.0015	0.005
Types of physical activity in last 4 weeks: None of the above	0	ukbb	European	0.0917	0.0424	2.1608	0.0307	0.024	0.0018	1.0193	0.008	-0.0015	0.0056
Non-cancer illness code_ self-reported: sleep apnoea	0	ukbb	European	0.2347	0.1091	2.1513	0.0315	0.0035	0.0014	1.0015	0.0066	-0.0085	0.0053
Non-cancer illness code_ self-reported: diabetes	0	ukbb	European	0.0799	0.0374	2.1377	0.0325	0.0361	0.0025	1.0371	0.0101	0.0133	0.0059
Diagnoses - main ICD10: D12 Benign neoplasm of colon_ rectum_ anus and anal canal	0	ukbb	European	0.1266	0.0593	2.1353	0.0327	0.0089	0.0014	1.0027	0.0062	0.0016	0.0051
Forced expiratory volume in 1-second (FEV1)	0	ukbb	European	0.0615	0.0289	2.1278	0.0334	0.149	0.0064	1.0653	0.0144	0.007	0.0079
Headaches for 3+ months	0	ukbb	European	-0.12	0.0565	-2.1246	0.0336	0.0575	0.0072	1.0053	0.0067	-0.0035	0.0053
Diabetes diagnosed by doctor	0	ukbb	European	0.0731	0.0346	2.1143	0.0345	0.0444	0.0027	1.0379	0.0105	0.0136	0.0061
Mouth/teeth dental problems: Mouth ulcers	0	ukbb	European	-0.0889	0.0421	-2.1104	0.0348	0.0293	0.004	1.0327	0.0115	-0.0045	0.0058
Diagnoses - main ICD10: M10 Gout	0	ukbb	European	-0.28	0.1326	-2.1108	0.0348	0.0026	0.0015	0.9989	0.0071	0.0166	0.0059
Doctor diagnosed hayfever or allergic rhinitis	0	ukbb	European	-0.0954	0.0453	-2.107	0.0351	0.0763	0.0094	1.0119	0.0086	-0.0084	0.006
Systemic lupus erythematosus	26502338	autoimmune	European	-0.1224	0.0583	-2.0988	0.0358	0.3875	0.0733	1.1083	0.0102	-0.0011	0.0068
Non-cancer illness code_ self-reported: migraine	0	ukbb	European	-0.1051	0.0503	-2.0898	0.0366	0.0172	0.0019	1.0099	0.0079	-0.0045	0.006
Medication for cholesterol_ blood pressure or diabetes: Cholesterol lowering medication	0	ukbb	European	0.0809	0.039	2.072	0.0383	0.0686	0.0066	1.0347	0.015	0.0047	0.0056
Duration of heavy DIY	0	ukbb	European	-0.1028	0.0497	-2.0682	0.0386	0.0329	0.0039	1.0074	0.0073	0.014	0.0056
Non-cancer illness code_ self-reported: eczema/dermatitis	0	ukbb	European	-0.1498	0.0727	-2.0614	0.0393	0.0087	0.0022	1.0149	0.0072	0.0051	0.0052
Time from waking to first cigarette	0	ukbb	European	0.1643	0.08	2.0548	0.0399	0.0841	0.0248	1.0176	0.0078	0.0098	0.0052
Illnesses of siblings: Stroke	0	ukbb	European	-0.2197	0.1075	-2.044	0.041	0.0047	0.0018	1.0059	0.0066	0.0072	0.0054
Height; Females at age 10 and males at age 12	23449627	anthropometric	European	0.11	0.054	2.0362	0.0417	0.4298	0.0481	0.953	0.008	0.0033	0.0061
Number of trend entries	0	ukbb	European	0.1667	0.082	2.0344	0.0419	0.0324	0.0098	1.0053	0.0065	0.0103	0.0049
Mouth/teeth dental problems: Toothache	0	ukbb	European	0.1334	0.0667	1.9997	0.0455	0.0084	0.0016	1.0031	0.0076	-0.0058	0.005
Reason for reducing amount of alcohol drunk: Health precaution	0	ukbb	European	0.093	0.0466	1.9948	0.0461	0.046	0.0046	0.9966	0.0072	-0.0123	0.0055
Forced expiratory volume in 1-second (FEV1)_ Best measure	0	ukbb	European	0.0572	0.0287	1.9922	0.0463	0.1642	0.0074	1.0578	0.0144	0.0081	0.0077
Extreme bmi	23563607	anthropometric	European	0.093	0.0467	1.9917	0.0464	0.7123	0.0597	1.0291	0.0119	0.0081	0.0084
Non-cancer illness code_ self-reported: asthma	0	ukbb	European	-0.0656	0.0333	-1.9742	0.0484	0.0574	0.0061	1.029	0.0159	0.0134	0.0062
Illnesses of siblings: None of the above (group 1)	0	ukbb	European	0.0771	0.0395	1.9518	0.051	0.037	0.0025	1.0129	0.0081	-6.91e-05	0.0059
Number of full brothers	0	ukbb	European	-0.0994	0.0512	-1.9409	0.0523	0.0185	0.0019	1.0291	0.0073	-0.0121	0.006
Types of physical activity in last 4 weeks: Other exercises (eg: swimming_ cycling_ keep fit_ bowling)	0	ukbb	European	-0.0729	0.0378	-1.9302	0.0536	0.0466	0.0024	1.0132	0.0086	0.0047	0.0065
Average weekly beer plus cider intake	0	ukbb	European	0.0743	0.0387	1.9188	0.055	0.0511	0.0033	1.0641	0.0091	-0.0156	0.007
Illnesses of mother: Diabetes	0	ukbb	European	0.0823	0.043	1.9145	0.0556	0.021	0.002	1.016	0.009	-0.0035	0.0053
Health satisfaction	0	ukbb	European	0.0863	0.0452	1.9105	0.0561	0.082	0.0055	1.0075	0.0072	0.0112	0.006
Diagnoses - main ICD10: R07 Pain in throat and chest	0	ukbb	European	0.0854	0.0448	1.9054	0.0567	0.0161	0.0017	1.0055	0.0074	0.0013	0.0048
Pain type(s) experienced in last month: Back pain	0	ukbb	European	0.0662	0.0348	1.9035	0.057	0.0395	0.0023	1.0229	0.009	0.011	0.0055
Non-cancer illness code_ self-reported: retinal detachment	0	ukbb	European	-0.199	0.1046	-1.9014	0.0572	0.0032	0.0014	1.0016	0.0065	0.015	0.0055
Diagnoses - main ICD10: K22 Other diseases of oesophagus	0	ukbb	European	-0.1963	0.1035	-1.8958	0.058	0.0041	0.0016	1.0051	0.0068	-0.0003	0.0058
Number of days/week walked 10+ minutes	0	ukbb	European	-0.0657	0.0347	-1.8933	0.0583	0.0425	0.0024	1.012	0.0083	-0.0147	0.0062
Loneliness_ isolation	0	ukbb	European	0.0681	0.0363	1.8762	0.0606	0.038	0.0023	1.0245	0.0078	0.0013	0.006
Leg pain on walking	0	ukbb	European	0.0915	0.049	1.8688	0.0616	0.0579	0.0054	1.0109	0.0071	0.0124	0.0056
Diagnoses - main ICD10: M23 Internal derangement of knee	0	ukbb	European	0.1189	0.0636	1.8686	0.0617	0.0077	0.002	1.0049	0.0077	0.0058	0.0055
Job involves heavy manual or physical work	0	ukbb	European	0.0531	0.0285	1.8612	0.0627	0.0861	0.0043	1.0392	0.0095	-0.0153	0.0054
Qualifications: NVQ or HND or HNC or equivalent	0	ukbb	European	-0.0909	0.049	-1.8565	0.0634	0.0154	0.0018	1.0097	0.0068	0.0013	0.0052
Why stopped smoking: Health precaution	0	ukbb	European	0.0966	0.0521	1.8557	0.0635	0.0536	0.0066	0.999	0.0068	0.0041	0.0052
Mean diameter for HDL particles	27005778	metabolites	European	-0.1322	0.0721	-1.8326	0.0669	0.1186	0.0309	1.0114	0.0201	-0.0052	0.0051
Diagnoses - main ICD10: H26 Other cataract	0	ukbb	European	0.1017	0.0557	1.8265	0.0678	0.0094	0.0017	0.994	0.0074	-0.0045	0.005
Ever stopped smoking for 6+ months	0	ukbb	European	0.1537	0.0843	1.8228	0.0683	0.0188	0.0057	1.0018	0.007	0.0101	0.0051
Frequency of heavy DIY in last 4 weeks	0	ukbb	European	-0.1057	0.0584	-1.809	0.0704	0.0205	0.0036	1.0093	0.0067	0.0011	0.0053
Mean time to correctly identify matches	0	ukbb	European	-0.0489	0.0271	-1.8063	0.0709	0.0736	0.003	1.0316	0.0093	-0.0234	0.006
Tinnitus: Yes_ now some of the time	0	ukbb	European	-0.2067	0.1148	-1.8006	0.0718	0.008	0.0041	1.0009	0.0064	0.0016	0.0052
Diagnoses - main ICD10: N81 Female genital prolapse	0	ukbb	European	0.1363	0.0757	1.7998	0.0719	0.0068	0.0016	1.0251	0.0069	-0.0105	0.0057
Current employment status: Retired	0	ukbb	European	0.1175	0.0653	1.7988	0.072	0.0088	0.0016	1.0159	0.0072	0.0161	0.0057
Mineral and other dietary supplements: Zinc	0	ukbb	European	-0.1095	0.061	-1.7945	0.0727	0.0114	0.0016	0.9893	0.0067	-0.0151	0.0057
Blood clot_ DVT_ bronchitis_ emphysema_ asthma_ rhinitis_ eczema_ allergy diagnosed by doctor: Asthma	0	ukbb	European	-0.06	0.0335	-1.7935	0.0729	0.0567	0.0061	1.0285	0.0158	0.0116	0.0063
Mouth/teeth dental problems: Dentures	0	ukbb	European	-0.0693	0.0386	-1.793	0.073	0.0484	0.0028	1.0367	0.0096	0.0136	0.0071
Pain type(s) experienced in last month: Knee pain	0	ukbb	European	0.0615	0.0344	1.7887	0.0737	0.0412	0.0023	1.0139	0.0085	0.0194	0.0061
Diagnoses - main ICD10: K80 Cholelithiasis	0	ukbb	European	0.1071	0.0602	1.7783	0.0754	0.0093	0.0019	1.0251	0.0085	0.0057	0.0049
Diagnoses - main ICD10: I48 Atrial fibrillation and flutter	0	ukbb	European	0.1021	0.0576	1.7729	0.0762	0.0127	0.0021	1.0109	0.0078	0.0046	0.0058
Breastfed as a baby	0	ukbb	European	0.076	0.043	1.7675	0.0772	0.0257	0.0026	1.0223	0.0081	-0.0081	0.0052
Mood swings	0	ukbb	European	0.0522	0.0299	1.7478	0.0805	0.0703	0.0035	1.0201	0.0104	-0.0006	0.0062
Birth weight	0	ukbb	European	0.0484	0.028	1.7276	0.0841	0.1098	0.0064	1.052	0.0135	0.0211	0.0056
Ever had prostate specific antigen (PSA) test	0	ukbb	European	0.0859	0.0498	1.7234	0.0848	0.0331	0.0035	1.0049	0.0079	0.0055	0.0058
Mouth/teeth dental problems: Painful gums	0	ukbb	European	-0.1271	0.075	-1.6948	0.0901	0.0067	0.0015	1.0041	0.0064	-0.0001	0.0052
Number of incorrect matches in round	0	ukbb	European	0.0499	0.0295	1.6925	0.0906	0.0533	0.0028	1.0069	0.0094	-0.016	0.0057
Why stopped smoking: None of the above	0	ukbb	European	-0.094	0.0559	-1.681	0.0928	0.0414	0.0058	0.9958	0.0062	0.0002	0.0053
Ever had hysterectomy (womb removed)	0	ukbb	European	0.118	0.0705	1.6742	0.0941	0.0218	0.0035	1.0047	0.0077	-0.0009	0.0064
Pain type(s) experienced in last month: None of the above	0	ukbb	European	-0.0539	0.0325	-1.6571	0.0975	0.0548	0.0027	1.037	0.0086	-0.0035	0.006
Tense / highly strung	0	ukbb	European	0.0621	0.0376	1.6497	0.099	0.0571	0.0032	0.9964	0.0096	-0.0233	0.0072
Non-cancer illness code_ self-reported: pernicious anaemia	0	ukbb	European	0.1537	0.0933	1.6472	0.0995	0.0034	0.0013	0.9915	0.0064	-0.0083	0.005
Non-cancer illness code_ self-reported: rheumatoid arthritis	0	ukbb	European	-0.1367	0.0835	-1.6384	0.1013	0.0049	0.0014	1.005	0.0061	0.0007	0.0053
Diagnoses - main ICD10: I20 Angina pectoris	0	ukbb	European	0.1108	0.0677	1.6372	0.1016	0.0085	0.0016	1.0087	0.0073	-0.004	0.0058
Smoking status: Current	0	ukbb	European	0.0611	0.0374	1.6341	0.1022	0.0528	0.0029	1.0135	0.0097	-0.0135	0.0063
Non-cancer illness code_ self-reported: back problem	0	ukbb	European	0.1287	0.08	1.6092	0.1076	0.0048	0.0013	1.0067	0.0064	-0.0012	0.0053
Diagnoses - main ICD10: I84 Haemorrhoids	0	ukbb	European	-0.0981	0.0612	-1.6024	0.1091	0.0093	0.0017	1.003	0.0079	0.0101	0.0055
Diagnoses - main ICD10: C61 Malignant neoplasm of prostate	0	ukbb	European	0.1498	0.0939	1.596	0.1105	0.0044	0.0015	1.0183	0.0071	-0.0058	0.0058
Seen doctor (GP) for nerves_ anxiety_ tension or depression	0	ukbb	European	0.0524	0.033	1.5887	0.1121	0.061	0.0031	1.0139	0.0102	-0.0025	0.0062
Fed-up feelings	0	ukbb	European	0.0522	0.0329	1.5883	0.1122	0.0723	0.0033	1.0233	0.0102	-0.0006	0.0069
Diagnoses - main ICD10: L03 Cellulitis	0	ukbb	European	0.1769	0.1122	1.5767	0.1149	0.0039	0.0015	1.0049	0.0071	0.0009	0.0057
Glutamine	27005778	metabolites	European	-0.1329	0.0848	-1.5661	0.1173	0.0679	0.021	1.0134	0.0071	0.0099	0.005
Triglycerides in very large VLDL	27005778	metabolites	European	0.1141	0.073	1.5626	0.1182	0.1176	0.0312	0.9828	0.0073	-0.0008	0.0051
Used an inhaler for chest within last hour	0	ukbb	European	-0.1519	0.0975	-1.5579	0.1193	0.0046	0.0016	1.0017	0.0065	0.0147	0.0053
Diagnoses - main ICD10: R14 Flatulence and related conditions	0	ukbb	European	-0.1548	0.0996	-1.5539	0.1202	0.0031	0.0013	0.9929	0.0062	0.0005	0.0049
Sleeplessness / insomnia	0	ukbb	European	0.0491	0.0317	1.5527	0.1205	0.0618	0.0027	1.0177	0.0087	-0.0004	0.0059
Hair/balding pattern: Pattern 4	0	ukbb	European	-0.045	0.029	-1.5521	0.1206	0.1724	0.0196	1.0958	0.0241	-0.0071	0.0066
Celiac disease	20190752	autoimmune	European	-0.0809	0.0523	-1.5457	0.1222	0.3164	0.0513	1.0649	0.0102	-0.0064	0.0072
Number of pregnancy terminations	0	ukbb	European	0.0935	0.0608	1.5378	0.1241	0.0619	0.0098	1.0064	0.0072	0.0012	0.0051
Vitamin and mineral supplements: Vitamin C	0	ukbb	European	-0.0892	0.058	-1.5374	0.1242	0.0131	0.0017	0.9997	0.007	-0.0119	0.0054
Frequency of unenthusiasm / disinterest in last 2 weeks	0	ukbb	European	0.0572	0.0372	1.5372	0.1243	0.0389	0.0029	1.0164	0.0096	0.0031	0.0058
Drive faster than motorway speed limit	0	ukbb	European	0.0519	0.0338	1.5364	0.1244	0.0569	0.0029	1.0298	0.0093	0.0186	0.0064
Family relationship satisfaction	0	ukbb	European	0.0676	0.0442	1.5306	0.1259	0.0564	0.005	1.0063	0.0071	0.0063	0.0053
Types of transport used (excluding work): Car/motor vehicle	0	ukbb	European	0.0636	0.0417	1.5224	0.1279	0.0247	0.0018	1.0099	0.0075	0.0101	0.0058
Reason for glasses/contact lenses: For astigmatism	0	ukbb	European	-0.0919	0.0606	-1.5183	0.1289	0.0089	0.0015	1.0267	0.0066	-0.0229	0.005
Diagnoses - main ICD10: S66 Injury of muscle and tendon at wrist and hand level	0	ukbb	European	-0.192	0.1264	-1.5182	0.129	0.0022	0.0012	0.9999	0.0068	0.0061	0.0047
Forced expiratory volume in 1 second (FEV1)	21946350	lung_function	European	0.0957	0.0631	1.5174	0.1292	0.1718	0.022	0.8811	0.0118	-0.0144	0.0091
Diagnoses - main ICD10: I30 Acute pericarditis	0	ukbb	European	0.1787	0.1178	1.5172	0.1292	0.0021	0.0013	0.9947	0.0068	-0.0035	0.005
No-wear time bias adjusted acceleration standard deviation	0	ukbb	European	-0.0679	0.0448	-1.5144	0.1299	0.0903	0.0085	0.9993	0.008	-0.0297	0.0054
Diagnoses - main ICD10: S09 Other and unspecified injuries of head	0	ukbb	European	-0.1475	0.0979	-1.5059	0.1321	0.0044	0.0015	0.9925	0.0068	0.0052	0.0059
Types of physical activity in last 4 weeks: Walking for pleasure (not as a means of transport)	0	ukbb	European	-0.0535	0.0356	-1.5027	0.1329	0.037	0.0021	1.0417	0.0083	-0.011	0.0062
Phospholipids in very large HDL	27005778	metabolites	European	-0.1312	0.0874	-1.502	0.1331	0.0887	0.031	1.0102	0.0179	-0.0048	0.0053
Child birth length	25281659	anthropometric	European	0.0942	0.0631	1.4934	0.1353	0.1654	0.0243	0.9956	0.0074	0.001	0.0062
Total lipids in large HDL	27005778	metabolites	European	-0.1026	0.069	-1.4863	0.1372	0.1308	0.0317	1.0037	0.0158	-0.0062	0.0052
Free cholesterol in large HDL	27005778	metabolites	European	-0.1097	0.0739	-1.4851	0.1375	0.1057	0.029	1.011	0.015	-0.0063	0.0051
Triglycerides in large VLDL	27005778	metabolites	European	0.1088	0.0735	1.4806	0.1387	0.114	0.0313	0.9906	0.0071	0.0004	0.0048
Ever unenthusiastic/disinterested for a whole week	0	ukbb	European	0.073	0.0495	1.4736	0.1406	0.0574	0.0061	1.0014	0.0078	0.0037	0.0056
Vitamin and mineral supplements: Vitamin D	0	ukbb	European	-0.115	0.0782	-1.4714	0.1412	0.0059	0.0015	0.997	0.0069	-0.0165	0.0052
Noisy workplace	0	ukbb	European	0.0663	0.0452	1.4668	0.1424	0.0608	0.0059	1.0291	0.0079	-0.0144	0.0056
Neo-openness to experience	21173776	personality	European	0.1081	0.0739	1.4638	0.1432	0.106	0.0284	0.9918	0.0068	-0.0108	0.0056
Diagnoses - main ICD10: M17 Gonarthrosis [arthrosis of knee]	0	ukbb	European	0.0767	0.0525	1.4614	0.1439	0.0141	0.0017	1.0066	0.0073	0.0072	0.0056
Illnesses of father: Chronic bronchitis/emphysema	0	ukbb	European	-0.0774	0.053	-1.4605	0.1441	0.0151	0.0019	1.0244	0.0071	0.0041	0.0056
Concentration of large HDL particles	27005778	metabolites	European	-0.0992	0.0681	-1.4574	0.145	0.1328	0.0313	1.0026	0.0161	-0.0066	0.0052
Non-cancer illness code_ self-reported: iron deficiency anaemia	0	ukbb	European	-0.1204	0.0831	-1.449	0.1473	0.0047	0.0014	0.9897	0.0063	-0.0112	0.0055
Cholesterol esters in large HDL	27005778	metabolites	European	-0.106	0.0735	-1.4417	0.1494	0.1227	0.0318	1.0034	0.0149	-0.0054	0.0053
Illnesses of father: None of the above (group 2)	0	ukbb	European	-0.0925	0.0644	-1.4356	0.1511	0.0088	0.0017	1.0033	0.0075	0.0027	0.0049
Current employment status: In paid employment or self-employed	0	ukbb	European	-0.0869	0.0607	-1.4313	0.1523	0.0083	0.0015	1.0201	0.0065	-0.0107	0.0056
Handedness (chirality/laterality): Left-handed	0	ukbb	European	0.0771	0.0539	1.4307	0.1525	0.0103	0.0017	1.0032	0.0072	-0.0062	0.0048
Alanine	27005778	metabolites	European	-0.1105	0.0773	-1.4293	0.1529	0.0921	0.0271	1.0121	0.0074	0.009	0.0053
Asthma	17611496	autoimmune	European	0.1014	0.071	1.428	0.1533	0.1121	0.0276	1.0132	0.0082	-0.0024	0.0055
Serum total triglycerides	27005778	metabolites	European	0.1017	0.0718	1.4173	0.1564	0.1249	0.0358	0.9938	0.0076	0.0012	0.0052
Frequency of depressed mood in last 2 weeks	0	ukbb	European	0.0547	0.0386	1.4165	0.1566	0.0423	0.003	1.012	0.009	-0.0015	0.0057
Phospholipids in large HDL	27005778	metabolites	European	-0.0977	0.0691	-1.4141	0.1573	0.1271	0.0309	1.0014	0.0149	-0.0071	0.0052
Mean Thalamus	25607358	brain_volume	European	-0.1123	0.0797	-1.4084	0.159	0.1438	0.0373	0.9794	0.0062	0.0033	0.0053
Diagnoses - main ICD10: R31 Unspecified haematuria	0	ukbb	European	0.1502	0.1069	1.4055	0.1599	0.003	0.0014	1.0069	0.0065	0.0019	0.005
Duration of other exercises	0	ukbb	European	0.0939	0.0671	1.3994	0.1617	0.0193	0.0032	1.0082	0.0076	0.0075	0.0054
Current tobacco smoking	0	ukbb	European	0.0506	0.0362	1.3982	0.1621	0.056	0.0031	1.0128	0.0098	-0.02	0.0064
Mineral and other dietary supplements: Calcium	0	ukbb	European	-0.075	0.0537	-1.3962	0.1627	0.0121	0.0016	0.9987	0.0068	-0.0262	0.0052
Number of self-reported cancers	0	ukbb	European	0.0958	0.0691	1.3863	0.1656	0.0067	0.0016	1.0119	0.0066	-0.0023	0.0053
Difference in height between adolescence and adulthood; age 14	23449627	anthropometric	European	-0.1051	0.076	-1.3832	0.1666	0.4668	0.1069	0.9807	0.0067	0.0094	0.0056
Non-cancer illness code_ self-reported: hypopituitarism	0	ukbb	European	-0.2754	0.2012	-1.3684	0.1712	0.0016	0.0013	0.9912	0.0064	0.0026	0.0056
Average weekly intake of other alcoholic drinks	0	ukbb	European	0.1742	0.1274	1.3671	0.1716	0.0091	0.0062	1.0041	0.0062	-0.0007	0.0052
Fracture resulting from simple fall	0	ukbb	European	0.1145	0.0842	1.3607	0.1736	0.0501	0.0149	0.9928	0.0069	0.0028	0.0054
Birth weight	27680694	anthropometric	European	0.0434	0.0319	1.3599	0.1739	0.1021	0.0067	1.044	0.0097	0.0139	0.0054
Neuroticism	24828478	personality	European	0.0952	0.0704	1.352	0.1764	0.0145	0.0035	1.009	0.0069	-0.0035	0.0054
Diagnoses - main ICD10: I21 Acute myocardial infarction	0	ukbb	European	0.0824	0.0611	1.3499	0.177	0.0107	0.0017	1.0055	0.0072	-0.0065	0.0058
Transport type for commuting to job workplace: Public transport	0	ukbb	European	-0.0639	0.0473	-1.3497	0.1771	0.0334	0.0034	1.0205	0.0071	0.0087	0.0054
Diagnoses - main ICD10: S76 Injury of muscle and tendon at hip and thigh level	0	ukbb	European	-0.2251	0.1676	-1.3427	0.1794	0.0018	0.0013	0.9952	0.0065	0.0108	0.0055
Illnesses of siblings: Severe depression	0	ukbb	European	-0.0678	0.0511	-1.3254	0.185	0.0142	0.0019	1.0052	0.0069	0.0069	0.0051
Hearing difficulty/problems: Yes	0	ukbb	European	0.0448	0.0339	1.3205	0.1867	0.0421	0.0026	1.0137	0.0091	-0.0011	0.0059
Glucose	27005778	metabolites	European	-0.0898	0.0683	-1.3134	0.189	0.0879	0.0221	0.9964	0.0066	0.0033	0.0048
Alcohol drinker status: Previous	0	ukbb	European	-0.0672	0.0513	-1.3111	0.1898	0.0131	0.0016	1.0079	0.0066	-0.0184	0.0057
Non-cancer illness code_ self-reported: muscle or soft tissue injuries	0	ukbb	European	-0.1727	0.1318	-1.3103	0.1901	0.0024	0.0015	1.0004	0.0073	0.007	0.0059
Concentration of large VLDL particles	27005778	metabolites	European	0.0927	0.0708	1.3094	0.1904	0.1367	0.0362	0.9742	0.007	0.004	0.0052
Mean diameter for VLDL particles	27005778	metabolites	European	0.0884	0.0677	1.3069	0.1912	0.1365	0.0362	0.9924	0.0082	0.0031	0.005
Phospholipids in very large VLDL	27005778	metabolites	European	0.1016	0.0778	1.306	0.1916	0.1073	0.0299	0.9852	0.007	-0.0008	0.0052
Eye problems/disorders: Cataract	0	ukbb	European	-0.0902	0.0692	-1.3029	0.1926	0.023	0.0046	1.013	0.0066	0.0163	0.0052
Ever taken oral contraceptive pill	0	ukbb	European	0.0715	0.0549	1.3022	0.1928	0.0186	0.0029	1.0124	0.0069	0.0102	0.0055
Current employment status: Doing unpaid or voluntary work	0	ukbb	European	0.0812	0.0625	1.2996	0.1938	0.0092	0.0014	1.0087	0.0064	-0.0121	0.0055
Phospholipids in chylomicrons and largest VLDL particles	27005778	metabolites	European	0.1079	0.0841	1.283	0.1995	0.0945	0.0285	0.985	0.0073	0.0002	0.0053
Total cholesterol in HDL	27005778	metabolites	European	-0.1012	0.0795	-1.2733	0.2029	0.0944	0.029	1.0087	0.0132	-0.0054	0.0052
Number of cigarettes previously smoked daily	0	ukbb	European	-0.0539	0.0425	-1.2694	0.2043	0.1	0.0143	1.0035	0.0087	0.006	0.0055
Home area population density - urban or rural: England/Wales - Village - less sparse	0	ukbb	European	-0.1641	0.1302	-1.2601	0.2076	0.0022	0.0014	1.0241	0.0067	-0.0005	0.0052
Forced expiratory volume in 1 second (FEV1)/Forced Vital capacity(FVC)	21946350	lung_function	European	0.0572	0.0456	1.2541	0.2098	0.1247	0.0141	0.9302	0.0084	-0.0125	0.0059
Fractured/broken bones in last 5 years	0	ukbb	European	0.0533	0.0426	1.2507	0.211	0.019	0.0021	1.0072	0.0078	0.0035	0.0055
Total cholesterol in large HDL	27005778	metabolites	European	-0.0934	0.0747	-1.2496	0.2114	0.1043	0.0288	1.0093	0.0153	-0.0061	0.0052
Diagnoses - main ICD10: B37 Candidiasis	0	ukbb	European	-0.3698	0.2992	-1.236	0.2164	0.0011	0.0014	0.9996	0.0063	0.0115	0.0053
Triglycerides in chylomicrons and largest VLDL particles	27005778	metabolites	European	0.1063	0.0864	1.2306	0.2185	0.0885	0.0289	0.9906	0.0073	0.0006	0.0054
Primary biliary cirrhosis	26394269	autoimmune	European	-0.0645	0.0525	-1.2287	0.2192	0.3727	0.065	1.0063	0.0096	0.0084	0.0064
Sensitivity / hurt feelings	0	ukbb	European	0.0424	0.0345	1.2275	0.2196	0.0626	0.0033	1.0216	0.0096	-0.0125	0.0064
Non-cancer illness code_ self-reported: vaginal prolapse/uterine prolapse	0	ukbb	European	0.1219	0.0995	1.2253	0.2205	0.0046	0.0014	1.0067	0.0067	-0.0179	0.0057
Non-cancer illness code_ self-reported: hypertrophic cardiomyopathy (hcm / hocm)	0	ukbb	European	-0.3631	0.2993	-1.2133	0.225	0.0011	0.0014	1.0039	0.0066	-0.0013	0.0054
Free cholesterol in large VLDL	27005778	metabolites	European	0.0846	0.0705	1.2	0.2301	0.1242	0.0315	0.9898	0.007	0.001	0.0052
Concentration of medium VLDL particles	27005778	metabolites	European	0.0805	0.0674	1.1951	0.2321	0.1497	0.0383	0.9824	0.0074	0.0035	0.0052
Non-cancer illness code_ self-reported: ulcerative colitis	0	ukbb	European	-0.1027	0.086	-1.1947	0.2322	0.0055	0.0018	1.0138	0.0078	0.0013	0.0053
Pain type(s) experienced in last month: Stomach or abdominal pain	0	ukbb	European	0.0549	0.0461	1.1919	0.2333	0.0216	0.0017	1.0065	0.0074	-0.0172	0.0056
Non-cancer illness code_ self-reported: emphysema/chronic bronchitis	0	ukbb	European	-0.0883	0.0741	-1.191	0.2337	0.0097	0.0016	0.9865	0.007	0.0062	0.0061
Medication for pain relief_ constipation_ heartburn: Omeprazole (e.g. Zanprol)	0	ukbb	European	-0.0561	0.0471	-1.1904	0.2339	0.0181	0.0017	1.0212	0.0073	-0.0059	0.0057
Underlying (primary) cause of death: ICD10: E85.4 Organ-limited amyloidosis	0	ukbb	European	0.1814	0.1525	1.1895	0.2342	0.0753	0.0578	0.9993	0.0069	-0.0124	0.0049
Sleep duration	0	ukbb	European	0.0433	0.0364	1.1887	0.2345	0.0711	0.0036	1.0247	0.0099	0.0297	0.0069
Diagnoses - main ICD10: R10 Abdominal and pelvic pain	0	ukbb	European	0.0656	0.0556	1.1795	0.2382	0.0123	0.0016	0.996	0.0071	-2.71e-05	0.0052
Cancer code_ self-reported: prostate cancer	0	ukbb	European	0.0869	0.0739	1.1765	0.2394	0.0064	0.0016	1.0135	0.0077	-0.0045	0.0061
Non-cancer illness code_ self-reported: malabsorption/coeliac disease	0	ukbb	European	-0.079	0.0678	-1.1655	0.2438	0.0095	0.0051	1.0048	0.0143	-0.0107	0.006
Hand grip strength (left)	0	ukbb	European	0.0315	0.027	1.164	0.2444	0.1046	0.0043	1.0564	0.0121	0.0278	0.0061
Average weekly red wine intake	0	ukbb	European	-0.0395	0.0341	-1.1613	0.2455	0.0568	0.0033	1.0132	0.0086	0.0371	0.0058
Total lipids in large VLDL	27005778	metabolites	European	0.0816	0.0704	1.16	0.246	0.1447	0.033	0.9862	0.0071	0.0025	0.0051
Medication for pain relief_ constipation_ heartburn: Paracetamol	0	ukbb	European	-0.0435	0.0376	-1.1557	0.2478	0.0425	0.0024	1.0267	0.0085	-0.0085	0.0065
Major depressive disorder	22472876	psychiatric	European	-0.0702	0.0619	-1.1327	0.2573	0.1763	0.0271	1.0037	0.0064	0.0037	0.0056
Illnesses of siblings: Heart disease	0	ukbb	European	-0.0551	0.049	-1.1245	0.2608	0.0175	0.0021	1.0108	0.0073	0.0049	0.0057
Total lipids in very large VLDL	27005778	metabolites	European	0.0805	0.0718	1.122	0.2619	0.1426	0.0319	0.9772	0.0074	0.0024	0.0053
Isoleucine	27005778	metabolites	European	0.0952	0.085	1.1199	0.2628	0.0698	0.0245	0.9956	0.0069	0.0076	0.005
Neck/shoulder pain for 3+ months	0	ukbb	European	-0.0933	0.0837	-1.1148	0.2649	0.0207	0.006	1.0089	0.0071	0.004	0.0054
Total cholesterol in large VLDL	27005778	metabolites	European	0.0814	0.0735	1.1082	0.2678	0.119	0.03	0.9925	0.0071	0.0008	0.005
Triglycerides in medium VLDL	27005778	metabolites	European	0.0891	0.0804	1.1079	0.2679	0.0974	0.0322	1.0021	0.0069	0.0029	0.0049
Blood clot_ DVT_ bronchitis_ emphysema_ asthma_ rhinitis_ eczema_ allergy diagnosed by doctor: Emphysema/chronic bronchitis	0	ukbb	European	-0.0697	0.0629	-1.1076	0.268	0.0128	0.0018	0.984	0.0078	0.008	0.0061
Neuroticism	27089181	personality	European	0.05	0.0452	1.1061	0.2687	0.0887	0.0076	0.9906	0.0122	-0.0066	0.0077
Duration of moderate activity	0	ukbb	European	0.0431	0.039	1.105	0.2691	0.0307	0.0024	1.0138	0.0078	-0.0078	0.0055
Phospholipids in small VLDL	27005778	metabolites	European	0.0769	0.0696	1.1044	0.2694	0.1186	0.035	0.9991	0.0087	0.0043	0.0054
Cancer diagnosed by doctor	0	ukbb	European	0.0773	0.0701	1.102	0.2705	0.0068	0.0016	1.009	0.0064	0.0018	0.0056
Total cholesterol in medium VLDL	27005778	metabolites	European	0.0777	0.0706	1.101	0.2709	0.1269	0.0361	0.9936	0.0078	0.0027	0.0053
Diastolic blood pressure_ automated reading	0	ukbb	European	-0.0318	0.0289	-1.1003	0.2712	0.1377	0.0055	1.0659	0.0159	-0.022	0.0079
Ever depressed for a whole week	0	ukbb	European	0.0542	0.0495	1.0947	0.2736	0.064	0.0055	0.992	0.0071	0.0026	0.0066
Difference in height between childhood and adulthood; age 8	23449627	anthropometric	European	0.0659	0.0602	1.094	0.274	0.3482	0.0558	0.9716	0.0081	0.0086	0.0059
Non-cancer illness code_ self-reported: high cholesterol	0	ukbb	European	0.0384	0.0352	1.0936	0.2741	0.0408	0.0053	1.0582	0.0273	0.0066	0.006
Triglycerides in small VLDL	27005778	metabolites	European	0.0783	0.0719	1.0889	0.2762	0.1213	0.0351	0.9958	0.0076	0.0038	0.0051
Started insulin within one year diagnosis of diabetes	0	ukbb	European	-0.1062	0.0977	-1.0872	0.277	0.156	0.0458	1.0051	0.0084	-0.01	0.0065
Forced expiratory volume in 1 second (FEV1)/Forced Vital capacity(FVC)	28166213	lung_function	European	0.0436	0.0402	1.0861	0.2774	0.2653	0.0209	0.9701	0.0085	-0.0136	0.0058
Heel bone mineral density (BMD) T-score_ automated (right)	0	ukbb	European	-0.0364	0.0336	-1.0851	0.2779	0.3062	0.0351	1.0304	0.0221	0.0174	0.0069
Nervous feelings	0	ukbb	European	-0.0453	0.0418	-1.0835	0.2786	0.0664	0.004	1.0143	0.012	-0.0378	0.0079
Valine	27005778	metabolites	European	0.0968	0.0901	1.0742	0.2827	0.0631	0.0201	1.0166	0.0073	0.0064	0.0051
Illnesses of mother: None of the above (group 1)	0	ukbb	European	0.0504	0.047	1.073	0.2833	0.0175	0.0017	1.0124	0.007	0.0119	0.0053
Maternal smoking around birth	0	ukbb	European	0.0366	0.0342	1.0712	0.2841	0.0507	0.0028	1.0356	0.0085	0.0086	0.0058
Total cholesterol in small LDL	27005778	metabolites	European	0.1163	0.1088	1.0693	0.2849	0.0659	0.0455	1.0186	0.0194	-0.0031	0.0058
Alcohol usually taken with meals	0	ukbb	European	-0.0327	0.0306	-1.0677	0.2856	0.1106	0.0051	1.0594	0.0089	0.0142	0.0058
Duration of vigorous activity	0	ukbb	European	-0.0533	0.05	-1.066	0.2864	0.036	0.0033	0.9915	0.0072	0.0006	0.0059
Illness_ injury_ bereavement_ stress in last 2 years: Marital separation/divorce	0	ukbb	European	-0.0967	0.0907	-1.0661	0.2864	0.0038	0.0014	1.0104	0.0071	0.0054	0.0055
Non-accidental death in close genetic family	0	ukbb	European	-0.08	0.0753	-1.062	0.2882	0.0181	0.0046	0.9957	0.0064	0.0073	0.0052
Total lipids in medium VLDL	27005778	metabolites	European	0.0738	0.0698	1.0571	0.2905	0.1418	0.0369	0.9876	0.0073	0.0041	0.0052
Non-cancer illness code_ self-reported: pneumothorax	0	ukbb	European	0.1131	0.1073	1.0543	0.2917	0.003	0.0014	0.9876	0.0068	-0.0052	0.0052
Total lipids in small VLDL	27005778	metabolites	European	0.0716	0.0682	1.05	0.2937	0.1455	0.0374	0.9927	0.0081	0.0054	0.0055
Phospholipids in large VLDL	27005778	metabolites	European	0.0795	0.0759	1.0471	0.2951	0.1187	0.0331	0.9906	0.0072	0.0009	0.0051
Medication for cholesterol_ blood pressure_ diabetes_ or take exogenous hormones: Cholesterol lowering medication	0	ukbb	European	0.0415	0.0397	1.0458	0.2957	0.0515	0.0056	1.0249	0.0137	0.0093	0.006
Cancer code_ self-reported: small intestine/small bowel cancer	0	ukbb	European	-0.1841	0.1771	-1.0395	0.2986	0.0015	0.0015	0.9983	0.0071	0.0009	0.0056
Happiness	0	ukbb	European	0.0438	0.0422	1.0387	0.299	0.0611	0.0049	1.0063	0.0074	-0.0069	0.0055
Frequency of walking for pleasure in last 4 weeks	0	ukbb	European	-0.043	0.0415	-1.035	0.3007	0.0345	0.0026	1.0072	0.0076	-0.009	0.0061
Peak expiratory flow (PEF)	0	ukbb	European	0.036	0.0349	1.033	0.3016	0.091	0.0047	1.0574	0.0127	0.0008	0.0074
Non-cancer illness code_ self-reported: ankylosing spondylitis	0	ukbb	European	-0.1615	0.1564	-1.0329	0.3016	0.0017	0.0015	1.0024	0.0072	0.0004	0.005
Qualifications: O levels/GCSEs or equivalent	0	ukbb	European	-0.0354	0.0344	-1.0297	0.3031	0.048	0.0025	1.0185	0.0092	0.0133	0.0062
Forced expiratory volume in 1 second (FEV1)/Forced Vital capacity(FVC)	26635082	lung_function	European	0.0555	0.0542	1.0229	0.3063	0.1175	0.0148	0.981	0.007	-0.0128	0.0053
Diagnoses - main ICD10: J33 Nasal polyp	0	ukbb	European	0.1117	0.1098	1.0172	0.309	0.0029	0.0016	1.0084	0.0073	0.0014	0.0055
Sitting height ratio	25865494	anthropometric	European	-0.0518	0.051	-1.0154	0.3099	0.2354	0.0276	0.9782	0.0072	0.0126	0.0056
Concentration of small VLDL particles	27005778	metabolites	European	0.0669	0.066	1.0129	0.3111	0.1511	0.0379	0.9913	0.0079	0.006	0.0055
Suffer from nerves	0	ukbb	European	-0.0396	0.0391	-1.0108	0.3121	0.0461	0.003	0.9984	0.0091	-0.0188	0.0065
Hearing difficulty/problems with background noise	0	ukbb	European	0.0334	0.033	1.0093	0.3128	0.0519	0.0028	1.0182	0.0089	0.0002	0.0062
Other serious medical condition/disability diagnosed by doctor	0	ukbb	European	0.0423	0.042	1.0076	0.3136	0.0252	0.0019	1.009	0.0074	-0.0024	0.0053
Cholesterol esters in medium VLDL	27005778	metabolites	European	0.0667	0.0663	1.0062	0.3143	0.1543	0.0388	0.9869	0.008	0.0029	0.0054
Types of transport used (excluding work): Cycle	0	ukbb	European	-0.0447	0.0446	-1.0032	0.3158	0.0242	0.0018	1.028	0.0076	-0.0107	0.006
Pain type(s) experienced in last month: Headache	0	ukbb	European	-0.0327	0.0329	-0.9936	0.3204	0.045	0.0027	1.005	0.0099	-0.0207	0.0057
Average number of double bonds in a fatty acid chain	27005778	metabolites	European	-0.0593	0.0599	-0.9889	0.3227	0.1883	0.0554	0.9996	0.0077	0.0007	0.0048
Bipolar disorder	21926972	psychiatric	European	-0.0452	0.0458	-0.9875	0.3234	0.4332	0.0382	1.0234	0.0074	0.0068	0.006
Diagnoses - main ICD10: G47 Sleep disorders	0	ukbb	European	0.076	0.0781	0.9725	0.3308	0.0067	0.0015	0.9925	0.0072	0.003	0.0051
Cigarettes smoked per day	20418890	smoking_behaviour	European	0.0623	0.0646	0.9651	0.3345	0.0622	0.016	1.0036	0.0065	-0.0084	0.005
Loud music exposure frequency	0	ukbb	European	0.0572	0.0595	0.9609	0.3366	0.0288	0.0046	1.0137	0.0072	0.0021	0.0053
Wheeze or whistling in the chest in last year	0	ukbb	European	0.0338	0.0352	0.9603	0.3369	0.06	0.0032	1.0319	0.0101	0.0121	0.0063
Non-cancer illness code_ self-reported: angina	0	ukbb	European	0.0417	0.0435	0.9587	0.3377	0.0232	0.0022	1.0204	0.0078	-0.0011	0.0053
Phospholipids in medium VLDL	27005778	metabolites	European	0.0732	0.0765	0.9578	0.3382	0.1111	0.0343	0.9994	0.0072	0.0034	0.0052
Depressive symptoms	27089181	psychiatric	European	0.0426	0.0447	0.9536	0.3403	0.0478	0.0041	1.0001	0.0078	0.005	0.006
Medication for cholesterol_ blood pressure or diabetes: None of the above	0	ukbb	European	-0.0357	0.0376	-0.948	0.3431	0.089	0.0052	1.0344	0.0105	-0.0008	0.0063
Job involves mainly walking or standing	0	ukbb	European	0.0281	0.0297	0.9442	0.3451	0.0786	0.0044	1.034	0.0093	-0.0082	0.0055
Ever had bowel cancer screening	0	ukbb	European	0.0533	0.0564	0.9437	0.3453	0.0131	0.0017	1.0204	0.0073	-0.012	0.006
Worry too long after embarrassment	0	ukbb	European	-0.0329	0.0354	-0.9301	0.3523	0.0649	0.0032	1.0178	0.0098	-0.0162	0.0067
Financial situation satisfaction	0	ukbb	European	0.041	0.0441	0.9287	0.353	0.056	0.006	1.0051	0.008	-0.0031	0.0054
Free cholesterol in medium VLDL	27005778	metabolites	European	0.0696	0.0752	0.9249	0.355	0.1117	0.0347	0.9977	0.0073	0.0038	0.0053
Had major operations	0	ukbb	European	0.0522	0.0564	0.9246	0.3552	0.0243	0.0037	1.0076	0.0074	0.0083	0.006
Total lipids in chylomicrons and largest VLDL particles	27005778	metabolites	European	0.0748	0.081	0.9235	0.3557	0.1216	0.0303	0.9891	0.007	0.0027	0.0056
Diagnoses - main ICD10: N92 Excessive_ frequent and irregular menstruation	0	ukbb	European	-0.0732	0.0792	-0.9233	0.3558	0.0071	0.0017	1.0025	0.0076	0.0144	0.0063
Type 2 Diabetes	22885922	glycemic	European	0.0476	0.0518	0.9181	0.3586	0.0886	0.0095	1.0075	0.0073	0.0078	0.006
Diagnoses - main ICD10: I10 Essential (primary) hypertension	0	ukbb	European	0.0969	0.1064	0.911	0.3623	0.0024	0.0014	1.0001	0.0059	-0.0004	0.0052
Reason for glasses/contact lenses: For short-sightedness_ i.e. only or mainly for distance viewing such as driving_ cinema etc (called myopia)	0	ukbb	European	-0.0385	0.0425	-0.9073	0.3642	0.0258	0.0022	1.1144	0.0089	-0.0425	0.0057
Free cholesterol in small VLDL	27005778	metabolites	European	0.0643	0.0709	0.9072	0.3643	0.1124	0.034	1.0009	0.0091	0.0046	0.0053
Maximum heart rate during fitness test	0	ukbb	European	-0.0585	0.0647	-0.9039	0.366	0.07	0.0133	1.0188	0.0083	-0.0188	0.0058
Triglycerides in very small VLDL	27005778	metabolites	European	0.0603	0.0667	0.9035	0.3662	0.1397	0.0364	0.9996	0.0093	0.0039	0.0054
Concentration of very large VLDL particles	27005778	metabolites	European	0.0619	0.0688	0.9005	0.3679	0.1288	0.03	0.9825	0.0066	0.0048	0.0051
Non-cancer illness code_ self-reported: uterine fibroids	0	ukbb	European	0.0667	0.0749	0.8917	0.3725	0.0072	0.0016	1.0085	0.0066	-0.0055	0.0052
Total cholesterol in small VLDL	27005778	metabolites	European	0.0703	0.079	0.8891	0.3739	0.0916	0.0319	1.0063	0.0099	0.0032	0.0055
Medication for pain relief_ constipation_ heartburn: Aspirin	0	ukbb	European	0.0423	0.0476	0.8878	0.3747	0.0212	0.0019	1.0134	0.007	0.0079	0.0062
Current employment status: Looking after home and/or family	0	ukbb	European	-0.0665	0.0755	-0.8811	0.3783	0.0069	0.0014	0.9969	0.0068	-0.0015	0.0052
Adopted as a child	0	ukbb	European	0.0667	0.0757	0.8808	0.3784	0.0062	0.0013	0.9995	0.0064	0.0022	0.0052
Townsend deprivation index at recruitment	0	ukbb	European	0.0342	0.039	0.8765	0.3807	0.034	0.0022	1.035	0.0083	-0.0088	0.0064
Phospholipids in IDL	27005778	metabolites	European	0.0886	0.1014	0.8739	0.3822	0.0578	0.0424	1.0235	0.0197	-0.0052	0.0055
Concentration of small LDL particles	27005778	metabolites	European	0.0754	0.0873	0.8641	0.3875	0.0921	0.0441	1.0088	0.0157	-0.0011	0.0057
Rheumatoid Arthritis	24390342	autoimmune	European	-0.0311	0.0364	-0.8554	0.3923	0.1643	0.0293	1.0128	0.0138	0.0011	0.0052
Cancer code_ self-reported: breast cancer	0	ukbb	European	0.0503	0.059	0.8537	0.3933	0.0101	0.0019	1.019	0.0086	-0.0017	0.0052
Fractured bone site(s): Ankle	0	ukbb	European	0.0568	0.0668	0.8503	0.3951	0.0067	0.0015	0.9948	0.0068	0.0037	0.0051
Infant head circumference	22504419	anthropometric	European	0.0619	0.0736	0.8412	0.4002	0.2241	0.0464	0.9935	0.0071	0.0025	0.0061
Diagnoses - main ICD10: M25 Other joint disorders_ not elsewhere classified	0	ukbb	European	-0.3337	0.3979	-0.8387	0.4016	0.0008	0.0014	1.015	0.0072	0.0093	0.0049
18:2 linoleic acid (LA)	27005778	metabolites	European	0.064	0.0764	0.8379	0.4021	0.1254	0.0504	1.0043	0.0094	0.0027	0.0047
Mothers age at death	0	ukbb	European	0.05	0.0599	0.8346	0.404	0.0239	0.0029	1.0299	0.0076	-0.0032	0.006
Diagnoses - main ICD10: J22 Unspecified acute lower respiratory infection	0	ukbb	European	0.1007	0.1209	0.8334	0.4046	0.0028	0.0016	0.9979	0.0071	-0.0037	0.0056
Why reduced smoking: Illness or ill health	0	ukbb	European	-0.0878	0.1054	-0.8325	0.4051	0.1197	0.0419	0.9977	0.0065	0.0068	0.0059
Diagnoses - main ICD10: K62 Other diseases of anus and rectum	0	ukbb	European	0.0676	0.0812	0.8315	0.4057	0.0045	0.0015	1.0037	0.0068	-0.0026	0.0053
Number of operations_ self-reported	0	ukbb	European	0.0277	0.0334	0.8292	0.407	0.0384	0.0023	1.0356	0.0074	0.0014	0.0055
Frequency of other exercises in last 4 weeks	0	ukbb	European	-0.0467	0.0567	-0.8236	0.4102	0.0214	0.0034	0.9975	0.0067	-0.012	0.0057
Total lipids in small LDL	27005778	metabolites	European	0.076	0.0931	0.816	0.4145	0.0833	0.0463	1.0098	0.0177	-0.0008	0.0058
Seen a psychiatrist for nerves_ anxiety_ tension or depression	0	ukbb	European	0.0276	0.0339	0.8156	0.4147	0.031	0.0023	1.0047	0.0082	0.002	0.0055
Why stopped smoking: Doctors advice	0	ukbb	European	0.0633	0.0779	0.8129	0.4163	0.0181	0.0055	0.9976	0.006	-0.0039	0.0052
Diagnoses - main ICD10: O75 Other complications of labour and delivery_ not elsewhere classified	0	ukbb	European	-0.0786	0.0969	-0.8112	0.4172	0.0028	0.0012	0.9885	0.0058	0.0056	0.0051
Triglycerides in IDL	27005778	metabolites	European	0.0572	0.0706	0.8102	0.4178	0.1091	0.0349	1.012	0.0151	-0.0003	0.0054
Bring up phlegm/sputum/mucus on most days	0	ukbb	European	-0.0614	0.0759	-0.8094	0.4183	0.0251	0.0059	1.0086	0.0077	0.0038	0.0054
Heel bone mineral density (BMD) T-score_ automated	0	ukbb	European	-0.0249	0.0308	-0.8086	0.4188	0.2984	0.0334	1.0862	0.0333	0.0063	0.0083
Non-cancer illness code_ self-reported: gout	0	ukbb	European	0.0307	0.038	0.8085	0.4188	0.0255	0.0068	0.9906	0.0187	0.0053	0.0054
Ever highly irritable/argumentative for 2 days	0	ukbb	European	0.0403	0.0503	0.8017	0.4227	0.0521	0.0055	0.9976	0.0072	0.0071	0.0058
Forced expiratory volume in 1-second (FEV1)_ predicted percentage	0	ukbb	European	-0.0275	0.0344	-0.799	0.4243	0.2049	0.0101	1.0342	0.0097	-0.0035	0.0066
Glycoprotein acetyls; mainly a1-acid glycoprotein	27005778	metabolites	European	0.058	0.0727	0.7983	0.4247	0.0962	0.0298	0.9878	0.0069	0.0051	0.005
Non-cancer illness code_ self-reported: arthritis (nos)	0	ukbb	European	0.0992	0.1243	0.7978	0.425	0.002	0.0014	1.0144	0.0066	-0.0079	0.0054
Non-cancer illness code_ self-reported: pulmonary embolism +/- dvt	0	ukbb	European	-0.0596	0.0754	-0.7906	0.4292	0.0058	0.0015	1.0062	0.0073	0.0045	0.0055
Number of cigarettes currently smoked daily (current cigarette smokers)	0	ukbb	European	-0.0543	0.0691	-0.7861	0.4318	0.1034	0.028	1.003	0.0074	-0.0024	0.0053
Diagnoses - main ICD10: R55 Syncope and collapse	0	ukbb	European	-0.0641	0.0816	-0.786	0.4319	0.0055	0.0014	1.0078	0.0071	0.0017	0.0057
Cholesterol esters in large VLDL	27005778	metabolites	European	0.0498	0.0633	0.7856	0.4321	0.1704	0.0364	0.9781	0.0075	0.0045	0.0051
Vascular/heart problems diagnosed by doctor: Angina	0	ukbb	European	0.0346	0.0442	0.7823	0.434	0.0226	0.0022	1.0234	0.0079	-3.81e-05	0.0053
Exposure to tobacco smoke at home	0	ukbb	European	-0.0433	0.0556	-0.7779	0.4367	0.0116	0.0017	0.9989	0.0065	0.0039	0.0056
Diagnoses - main ICD10: F31 Bipolar affective disorder	0	ukbb	European	-0.0616	0.0792	-0.7777	0.4367	0.0048	0.0015	0.9868	0.0071	0.0041	0.0053
Blood clot_ DVT_ bronchitis_ emphysema_ asthma_ rhinitis_ eczema_ allergy diagnosed by doctor: Blood clot in the lung	0	ukbb	European	-0.0554	0.0718	-0.7716	0.4404	0.0063	0.0015	1.0067	0.0071	0.0055	0.0056
Blood clot_ DVT_ bronchitis_ emphysema_ asthma_ rhinitis_ eczema_ allergy diagnosed by doctor: Blood clot in the leg (DVT)	0	ukbb	European	0.0491	0.0638	0.77	0.4413	0.0109	0.0017	1.0103	0.0102	-0.0001	0.0057
Guilty feelings	0	ukbb	European	0.0264	0.0344	0.7685	0.4422	0.051	0.0026	1.0093	0.0084	-0.0063	0.0063
Former vs Current smoker	20418890	smoking_behaviour	European	0.0515	0.0672	0.7665	0.4434	0.0598	0.011	1.0022	0.0064	-0.0054	0.0049
Diagnoses - main ICD10: K52 Other non-infective gastro-enteritis and colitis	0	ukbb	European	-0.0575	0.0753	-0.7639	0.4449	0.0051	0.0013	1.0013	0.0064	-0.0005	0.0048
Diagnoses - main ICD10: N19 Unspecified renal failure	0	ukbb	European	-0.0835	0.1101	-0.758	0.4484	0.0025	0.0013	1.0013	0.0063	0.0035	0.0052
Number of treatments/medications taken	0	ukbb	European	-0.0235	0.0312	-0.7528	0.4515	0.0603	0.0026	1.033	0.0093	-0.0046	0.006
Diagnoses - main ICD10: K20 Oesophagitis	0	ukbb	European	-0.0886	0.1189	-0.7454	0.456	0.0022	0.0013	1.0071	0.0066	-0.0031	0.0055
Concentration of chylomicrons and largest VLDL particles	27005778	metabolites	European	0.0604	0.0811	0.7449	0.4564	0.1166	0.0297	0.9885	0.0065	0.0041	0.0055
Illnesses of father: Prostate cancer	0	ukbb	European	0.0488	0.066	0.7401	0.4593	0.0083	0.0018	1.0139	0.0081	-0.0075	0.0058
Concentration of very small VLDL particles	27005778	metabolites	European	0.0547	0.0741	0.7379	0.4606	0.1163	0.0367	1.0067	0.0123	0.0006	0.0055
Diagnoses - main ICD10: Z47 Other orthopaedic follow-up care	0	ukbb	European	-0.0669	0.0907	-0.7377	0.4607	0.0034	0.0013	0.9991	0.0064	-0.0006	0.0049
Frequency of travelling from home to job workplace	0	ukbb	European	0.0418	0.0568	0.7357	0.4619	0.021	0.0028	1.0187	0.007	-0.0161	0.0059
Cancer code_ self-reported: basal cell carcinoma	0	ukbb	European	-0.0403	0.0548	-0.7357	0.4619	0.0107	0.0019	0.9969	0.0081	0.0014	0.0054
Fasting glucose main effect	22581228	glycemic	European	-0.0322	0.0439	-0.7342	0.4628	0.101	0.0193	0.997	0.0095	0.0057	0.006
Vitamin and mineral supplements: Vitamin E	0	ukbb	European	0.0561	0.0764	0.7339	0.463	0.0069	0.0014	0.9948	0.0063	-0.0174	0.0053
Age completed full time education	0	ukbb	European	-0.021	0.0286	-0.7333	0.4634	0.084	0.0043	1.0656	0.0098	0.017	0.0058
Concentration of medium LDL particles	27005778	metabolites	European	0.0714	0.0976	0.7312	0.4647	0.0742	0.0497	1.0143	0.0202	-0.0014	0.0059
Miserableness	0	ukbb	European	0.026	0.036	0.7228	0.4698	0.0642	0.0038	1.0183	0.0112	-0.0091	0.0068
Number of older siblings	0	ukbb	European	-0.1059	0.1475	-0.718	0.4728	0.0064	0.0051	1.0063	0.0067	0.0026	0.0055
Work/job satisfaction	0	ukbb	European	-0.041	0.0572	-0.7173	0.4732	0.0481	0.0067	0.9945	0.0066	-0.0006	0.0054
Diagnoses - main ICD10: K30 Dyspepsia	0	ukbb	European	0.069	0.0966	0.7142	0.4751	0.0035	0.0014	1.0044	0.0061	-0.0159	0.0058
Non-cancer illness code_ self-reported: depression	0	ukbb	European	0.0332	0.0465	0.7132	0.4757	0.0184	0.0019	0.9991	0.0074	0.0094	0.0058
Qualifications: CSEs or equivalent	0	ukbb	European	0.0318	0.0448	0.7106	0.4774	0.0206	0.0019	1.0605	0.0073	-0.0146	0.0054
Current employment status: Unable to work because of sickness or disability	0	ukbb	European	-0.033	0.0466	-0.707	0.4796	0.0246	0.0019	1.0167	0.0074	0.0013	0.0057
Medication for pain relief_ constipation_ heartburn: None of the above	0	ukbb	European	-0.0227	0.0324	-0.7016	0.483	0.0537	0.0026	1.0306	0.009	0.0064	0.0058
Long-standing illness_ disability or infirmity	0	ukbb	European	0.0239	0.0341	0.6998	0.484	0.0499	0.0025	1.0277	0.0083	-0.0003	0.006
Diagnoses - main ICD10: J44 Other chronic obstructive pulmonary disease	0	ukbb	European	0.0538	0.0771	0.6984	0.4849	0.0051	0.0014	0.9927	0.0064	-0.0119	0.0053
Concentration of IDL particles	27005778	metabolites	European	0.0658	0.0944	0.6964	0.4862	0.0712	0.0441	1.0206	0.0184	-0.003	0.0056
Pain type(s) experienced in last month: Pain all over the body	0	ukbb	European	-0.0436	0.0628	-0.6935	0.488	0.0098	0.0017	1.0055	0.0075	0.0015	0.0058
Bilateral oophorectomy (both ovaries removed)	0	ukbb	European	0.0392	0.0566	0.6927	0.4885	0.0209	0.0032	1.0121	0.0072	0.0016	0.0058
Mouth/teeth dental problems: None of the above	0	ukbb	European	0.0278	0.0401	0.6914	0.4893	0.0385	0.002	1.0172	0.0078	-0.0124	0.0066
Eye problems/disorders: Glaucoma	0	ukbb	European	-0.0368	0.0533	-0.6913	0.4894	0.0402	0.0056	1.0187	0.0078	0.0171	0.0051
Comparative body size at age 10	0	ukbb	European	-0.0199	0.029	-0.6862	0.4926	0.1468	0.0096	1.0147	0.0173	0.0182	0.0075
Diagnoses - main ICD10: M16 Coxarthrosis [arthrosis of hip]	0	ukbb	European	-0.0407	0.0596	-0.6828	0.4948	0.0111	0.0018	1.0084	0.008	0.0148	0.0056
Total lipids in medium LDL	27005778	metabolites	European	0.065	0.0964	0.6741	0.5002	0.0759	0.051	1.0125	0.021	-0.001	0.0059
Diagnoses - main ICD10: G56 Mononeuropathies of upper limb	0	ukbb	European	-0.0356	0.0528	-0.673	0.501	0.0142	0.0018	1.0074	0.0073	-0.0011	0.0058
Average weekly fortified wine intake	0	ukbb	European	0.042	0.0629	0.6678	0.5042	0.0129	0.0022	1.0177	0.0067	-0.0063	0.0057
Apolipoprotein B	27005778	metabolites	European	0.06	0.0905	0.6634	0.507	0.0789	0.0402	1.0107	0.0149	0.0031	0.0055
Fractured bone site(s): Other bones	0	ukbb	European	0.0379	0.0571	0.6636	0.507	0.009	0.0017	1.0012	0.007	0.0052	0.005
Medication for cholesterol_ blood pressure_ diabetes_ or take exogenous hormones: Blood pressure medication	0	ukbb	European	-0.0229	0.0345	-0.663	0.5073	0.1074	0.0069	1.0311	0.0119	-0.0034	0.0062
Frequency of tenseness / restlessness in last 2 weeks	0	ukbb	European	0.0227	0.0344	0.659	0.5099	0.0437	0.0027	1.0136	0.0092	-0.0122	0.0061
Morning/evening person (chronotype)	0	ukbb	European	-0.0178	0.0271	-0.6586	0.5102	0.1163	0.0044	1.0389	0.0122	0.0209	0.0067
Total lipids in very small VLDL	27005778	metabolites	European	0.0497	0.0765	0.6497	0.5159	0.1072	0.0365	1.0111	0.0129	0.0007	0.0055
Hand grip strength (right)	0	ukbb	European	0.0187	0.0288	0.648	0.517	0.1043	0.0044	1.0632	0.0132	0.0283	0.0058
Diagnoses - main ICD10: N40 Hyperplasia of prostate	0	ukbb	European	0.0463	0.0718	0.6453	0.5188	0.0057	0.0014	1.0101	0.0068	-0.0041	0.0054
Non-cancer illness code_ self-reported: bladder problem (not cancer)	0	ukbb	European	0.0727	0.1128	0.6448	0.519	0.0022	0.0013	1.0016	0.0069	-0.0012	0.0053
Concentration of large LDL particles	27005778	metabolites	European	0.063	0.0986	0.6387	0.523	0.0694	0.0515	1.0187	0.0218	-0.0022	0.0058
Had other major operations	0	ukbb	European	0.0331	0.0518	0.6382	0.5234	0.0316	0.0031	1.0075	0.0072	0.0013	0.0055
Diagnoses - main ICD10: F43 Reaction to severe stress_ and adjustment disorders	0	ukbb	European	0.3	0.4754	0.6309	0.5281	0.0005	0.0012	1.0036	0.0056	0.0008	0.005
Diagnoses - main ICD10: M20 Acquired deformities of fingers and toes	0	ukbb	European	-0.0367	0.0584	-0.6286	0.5296	0.0098	0.0015	0.9986	0.0071	0.001	0.0052
Urinary albumin-to-creatinine ratio	26631737	kidney	European	-0.0401	0.0641	-0.6261	0.5313	0.0476	0.0087	0.9954	0.0065	-0.0042	0.0059
Hair/balding pattern: Pattern 3	0	ukbb	European	-0.0277	0.0442	-0.626	0.5313	0.0566	0.0139	1.0214	0.0191	0.0049	0.0057
Type of tobacco previously smoked: Cigars or pipes	0	ukbb	European	0.06	0.0969	0.6196	0.5355	0.014	0.0056	0.998	0.0065	0.0011	0.0053
Age when periods started (menarche)	0	ukbb	European	-0.017	0.0276	-0.618	0.5366	0.2108	0.0107	1.0005	0.0122	0.0035	0.0067
Neuroticism score	0	ukbb	European	0.0201	0.0332	0.6071	0.5438	0.1189	0.0061	1.0162	0.0131	-0.0162	0.0074
Cholesterol esters in medium LDL	27005778	metabolites	European	0.0581	0.0958	0.6067	0.544	0.0751	0.0509	1.0129	0.0211	-0.0014	0.0059
Non-cancer illness code_ self-reported: mania/bipolar disorder/manic depression	0	ukbb	European	-0.0494	0.0816	-0.6059	0.5446	0.0057	0.0014	0.9994	0.0063	0.0034	0.0056
Diagnoses - main ICD10: K21 Gastro-oesophageal reflux disease	0	ukbb	European	-0.0443	0.0733	-0.6041	0.5457	0.0067	0.0013	1.0012	0.0059	0.0013	0.0054
Non-cancer illness code_ self-reported: nasal polyps	0	ukbb	European	0.0423	0.0701	0.6036	0.5461	0.0052	0.0015	1.0067	0.0066	-0.0083	0.0056
Description of average fatty acid chain length; not actual carbon number	27005778	metabolites	European	-0.046	0.0769	-0.5985	0.5495	0.0941	0.0348	0.9845	0.0066	0.0034	0.0043
Non-cancer illness code_ self-reported: diverticular disease/diverticulitis	0	ukbb	European	-0.0303	0.051	-0.5944	0.5523	0.0135	0.0017	0.9929	0.0073	-0.0012	0.0055
Non-cancer illness code_ self-reported: deep venous thrombosis (dvt)	0	ukbb	European	0.0376	0.0633	0.5928	0.5533	0.0113	0.0018	1.008	0.0101	0.0005	0.0058
Diagnoses - main ICD10: R69 Unknown and unspecified causes of morbidity	0	ukbb	European	0.0452	0.0762	0.5927	0.5534	0.0055	0.0014	0.9956	0.0065	-0.0058	0.0051
Vitamin and mineral supplements: Vitamin A	0	ukbb	European	-0.0581	0.0981	-0.5919	0.5539	0.0038	0.0015	1.0021	0.0065	-0.0019	0.0055
HbA1C	20858683	glycemic	European	0.0348	0.0594	0.5861	0.5578	0.0666	0.0118	0.998	0.0072	0.0032	0.0052
Ulcerative colitis	26192919	autoimmune	European	0.0254	0.0433	0.5859	0.5579	0.2692	0.0327	1.0431	0.0097	0.0079	0.0052
Extreme waist-to-hip ratio	23563607	anthropometric	European	0.0355	0.0609	0.5826	0.5602	0.3627	0.0593	0.9784	0.0083	0.0018	0.0073
Non-cancer illness code_ self-reported: psoriasis	0	ukbb	European	-0.0521	0.0895	-0.5823	0.5604	0.0068	0.0017	1.0169	0.0083	0.0119	0.0061
Illnesses of siblings: None of the above (group 2)	0	ukbb	European	0.0436	0.0751	0.5806	0.5615	0.0087	0.0018	1.0035	0.0069	-0.0012	0.0052
Fractured bone site(s): Arm	0	ukbb	European	0.0521	0.0899	0.5799	0.562	0.0052	0.0015	0.9951	0.007	0.0028	0.0059
Worrier / anxious feelings	0	ukbb	European	-0.0229	0.0399	-0.5748	0.5654	0.0795	0.0049	1.0011	0.0121	-0.0159	0.0074
Urinary albumin-to-creatinine ratio (non-diabetes)	26631737	kidney	European	-0.042	0.0732	-0.5735	0.5663	0.0513	0.0103	0.9965	0.0065	-0.0079	0.0061
Total lipids in IDL	27005778	metabolites	European	0.0541	0.0946	0.5715	0.5677	0.0696	0.0458	1.0215	0.0193	-0.0027	0.0056
Total lipids in large LDL	27005778	metabolites	European	0.0564	0.0988	0.5705	0.5683	0.0692	0.0529	1.0173	0.0225	-0.002	0.0058
Alcohol drinker status: Never	0	ukbb	European	-0.0308	0.0546	-0.5648	0.5722	0.0141	0.0017	1.0162	0.0072	-0.0089	0.0058
Free cholesterol in IDL	27005778	metabolites	European	0.0487	0.0862	0.5647	0.5723	0.0701	0.0436	1.0224	0.0206	-0.0048	0.0056
Heel bone mineral density (BMD) T-score_ automated (left)	0	ukbb	European	-0.0191	0.0338	-0.5646	0.5723	0.3041	0.0352	1.0303	0.021	0.0145	0.0068
Former alcohol drinker	0	ukbb	European	-0.0389	0.0692	-0.5632	0.5733	0.114	0.022	0.9977	0.0062	-0.0042	0.0058
Prospective memory result	0	ukbb	European	0.0229	0.0408	0.5622	0.574	0.0591	0.0052	1.0101	0.0078	0.0039	0.0052
Non-cancer illness code_ self-reported: osteoarthritis	0	ukbb	European	-0.0265	0.0472	-0.5609	0.5748	0.0192	0.0018	1.0289	0.0076	0.0239	0.0058
Inflammatory Bowel Disease (Euro)	26192919	autoimmune	European	0.0196	0.0357	0.5503	0.5821	0.3446	0.0346	1.05	0.01	0.0074	0.0051
Fractured bone site(s): Wrist	0	ukbb	European	0.0423	0.0774	0.5467	0.5846	0.0068	0.0016	1.0078	0.0074	-0.0071	0.0057
Age at first live birth	0	ukbb	European	0.0168	0.031	0.5426	0.5874	0.1671	0.0081	1.0478	0.0095	-0.003	0.0062
PGC cross-disorder analysis	23453885	psychiatric	European	-0.0244	0.0451	-0.542	0.5878	0.1743	0.0135	1.0107	0.0112	0.0128	0.0085
Apolipoprotein A-I	27005778	metabolites	European	-0.0521	0.0965	-0.5402	0.5891	0.0692	0.0318	1.0073	0.0121	-0.0041	0.0051
Number of days/week of vigorous physical activity 10+ minutes	0	ukbb	European	-0.02	0.0372	-0.538	0.5906	0.0379	0.0024	1.0163	0.0079	-0.0185	0.0061
Non-cancer illness code_ self-reported: polio / poliomyelitis	0	ukbb	European	0.0617	0.1148	0.5369	0.5913	0.0026	0.0013	0.9932	0.0065	-0.009	0.0054
Diagnoses - main ICD10: I80 Phlebitis and thrombophlebitis	0	ukbb	European	-0.0389	0.0727	-0.5346	0.5929	0.0083	0.0016	0.9938	0.0083	0.0123	0.0056
Age started oral contraceptive pill	0	ukbb	European	-0.0239	0.045	-0.5313	0.5952	0.049	0.0045	1.0148	0.0077	0.0082	0.0058
Frequency of tiredness / lethargy in last 2 weeks	0	ukbb	European	0.0169	0.032	0.5296	0.5964	0.0598	0.0032	1.0252	0.0095	-0.0028	0.0057
Hair/balding pattern: Pattern 2	0	ukbb	European	-0.0221	0.0417	-0.5293	0.5966	0.051	0.0062	1.0368	0.0125	-0.0035	0.0061
Underlying (primary) cause of death: ICD10: J84.1 Other interstitial pulmonary diseases with fibrosis	0	ukbb	European	-0.0596	0.1139	-0.5233	0.6007	0.0962	0.0638	0.9942	0.0067	-0.0036	0.0049
Subjective well being	27089181	psychiatric	European	-0.023	0.0444	-0.5187	0.604	0.025	0.0021	1.0011	0.0072	0.005	0.0061
Number of unsuccessful stop-smoking attempts	0	ukbb	European	-0.0313	0.0606	-0.5175	0.6048	0.0516	0.0074	1.0053	0.0071	0.0035	0.0053
Illnesses of siblings: Diabetes	0	ukbb	European	0.0262	0.0508	0.517	0.6052	0.0207	0.0022	1.0096	0.0074	0.0008	0.0056
Diagnoses - main ICD10: K60 Fissure and fistula of anal and rectal regions	0	ukbb	European	-0.0351	0.0687	-0.5104	0.6098	0.0056	0.0014	0.9802	0.0064	0.0035	0.005
Pain type(s) experienced in last month: Hip pain	0	ukbb	European	0.0214	0.0423	0.5067	0.6124	0.0235	0.0019	1.0171	0.0077	0.0135	0.0054
Pack years adult smoking as proportion of life span exposed to smoking PREVIEW ONLY	0	ukbb	European	-0.0186	0.0371	-0.501	0.6164	0.1273	0.0114	1.0151	0.01	0.0044	0.0059
Childhood obesity	22484627	anthropometric	European	0.024	0.048	0.5002	0.617	0.4193	0.0421	0.9253	0.007	-0.0008	0.0057
Illnesses of father: Diabetes	0	ukbb	European	0.0266	0.0534	0.4988	0.6179	0.0186	0.0023	1.0272	0.0076	0.0114	0.0057
Forced Vital capacity(FVC)	28166213	lung_function	European	-0.0174	0.0354	-0.491	0.6234	0.2648	0.0162	0.977	0.0077	0.0011	0.0055
Vascular/heart problems diagnosed by doctor: None of the above	0	ukbb	European	-0.0146	0.0297	-0.4904	0.6238	0.115	0.0046	1.0594	0.0154	0.0042	0.0073
Number of self-reported non-cancer illnesses	0	ukbb	European	-0.0146	0.0297	-0.4896	0.6244	0.0611	0.0026	1.0278	0.01	0.0023	0.0056
Non-cancer illness code_ self-reported: crohns disease	0	ukbb	European	0.0388	0.0806	0.4808	0.6307	0.0055	0.0015	1.0046	0.0065	-0.0017	0.0055
Exposure to tobacco smoke outside home	0	ukbb	European	-0.0168	0.035	-0.479	0.6319	0.0321	0.0026	1.0205	0.0091	0.0164	0.0053
Duration of strenuous sports	0	ukbb	European	0.0479	0.1001	0.478	0.6326	0.0298	0.0137	0.9948	0.0067	0.0134	0.0053
Creatinine	27005778	metabolites	European	0.031	0.0648	0.4778	0.6328	0.1167	0.0256	1.0105	0.0073	0.0097	0.0054
Phospholipids in very small VLDL	27005778	metabolites	European	0.0396	0.0838	0.4722	0.6368	0.0835	0.0387	1.0168	0.0157	-0.0016	0.0056
Illness_ injury_ bereavement_ stress in last 2 years: Serious illness_ injury or assault of a close relative	0	ukbb	European	0.0306	0.0649	0.4721	0.6369	0.0112	0.0017	1.0103	0.0074	-0.0018	0.006
Cholesterol esters in large LDL	27005778	metabolites	European	0.0458	0.0972	0.4708	0.6378	0.071	0.0523	1.0151	0.0222	-0.0012	0.0059
Illnesses of father: Lung cancer	0	ukbb	European	0.0233	0.0504	0.4629	0.6434	0.0144	0.002	0.9948	0.0078	-0.0072	0.0047
Medication for cholesterol_ blood pressure_ diabetes_ or take exogenous hormones: None of the above	0	ukbb	European	0.0167	0.0365	0.4567	0.6479	0.067	0.0047	1.0184	0.0084	0.0018	0.0058
Illnesses of father: Heart disease	0	ukbb	European	0.0189	0.0415	0.4562	0.6482	0.031	0.0026	1.0003	0.0083	3.94e-05	0.006
Diagnoses - main ICD10: M72 Fibroblastic disorders	0	ukbb	European	-0.0282	0.0619	-0.4558	0.6485	0.0108	0.0031	1.0181	0.0212	0.0021	0.0055
Citrate	27005778	metabolites	European	-0.0333	0.0746	-0.447	0.6549	0.0722	0.0225	1.0115	0.0078	0.0018	0.0048
Fathers age at death	0	ukbb	European	0.0195	0.0436	0.4466	0.6552	0.0339	0.0031	1.0254	0.0076	-0.0051	0.0058
Tinnitus: Yes_ but not now_ but have in the past	0	ukbb	European	-0.0326	0.0736	-0.4425	0.6581	0.0189	0.0043	0.9896	0.0065	-0.0048	0.0049
Non-cancer illness code_ self-reported: joint disorder	0	ukbb	European	0.0547	0.1273	0.4294	0.6677	0.002	0.0013	0.9913	0.006	0.0025	0.0053
Diagnoses - main ICD10: E04 Other non-toxic goitre	0	ukbb	European	-0.0328	0.078	-0.4208	0.6739	0.0054	0.0014	0.9903	0.0064	-0.0031	0.0055
Diagnoses - main ICD10: E03 Other hypothyroidism	0	ukbb	European	0.1553	0.3764	0.4127	0.6798	0.0004	0.0012	0.9988	0.0059	-0.0008	0.0044
Child birth weight	23202124	anthropometric	European	0.0239	0.058	0.4123	0.6802	0.1136	0.0177	1.0048	0.0057	0.0025	0.0053
Diagnoses - main ICD10: N32 Other disorders of bladder	0	ukbb	European	-0.0342	0.0851	-0.4022	0.6875	0.0037	0.0011	0.9915	0.006	0.0009	0.0054
Illnesses of mother: Chronic bronchitis/emphysema	0	ukbb	European	0.022	0.055	0.3998	0.6893	0.013	0.002	1.0032	0.0071	-0.0067	0.0052
Pulse rate	0	ukbb	European	0.014	0.0359	0.3899	0.6966	0.1378	0.0146	1.0272	0.0158	0.0103	0.0063
Falls in the last year	0	ukbb	European	0.0148	0.038	0.3889	0.6973	0.0326	0.0021	1.0056	0.0078	0.0084	0.0056
Eye problems/disorders: Diabetes related eye disease	0	ukbb	European	0.0264	0.0684	0.3867	0.699	0.0205	0.0045	1.0061	0.007	0.0066	0.0053
Squamous cell lung cancer	27488534	cancer	European	-0.0296	0.0767	-0.3857	0.6997	0.0368	0.0117	1.0108	0.0062	0.001	0.005
Free cholesterol in medium HDL	27005778	metabolites	European	-0.0341	0.0887	-0.3841	0.7009	0.0629	0.0228	0.9995	0.0082	-0.0059	0.0049
Non-cancer illness code_ self-reported: hyperthyroidism/thyrotoxicosis	0	ukbb	European	-0.0248	0.0652	-0.3802	0.7038	0.0077	0.0018	1.0065	0.0076	-0.0012	0.0057
Anorexia Nervosa	24514567	psychiatric	European	-0.0144	0.0379	-0.3798	0.7041	0.5488	0.0294	0.9002	0.0074	-0.009	0.0052
Diagnoses - main ICD10: M24 Other specific joint derangements	0	ukbb	European	0.0334	0.0883	0.3782	0.7053	0.0037	0.0014	0.9866	0.0067	-0.0047	0.0051
Wears glasses or contact lenses	0	ukbb	European	0.0181	0.0485	0.3726	0.7094	0.0161	0.0015	1.0011	0.0075	-0.0027	0.0052
Illness_ injury_ bereavement_ stress in last 2 years: Death of a close relative	0	ukbb	European	0.0273	0.0737	0.37	0.7114	0.0058	0.0015	1.0044	0.0068	-0.0023	0.0053
Alcohol intake frequency.	0	ukbb	European	-0.0103	0.0279	-0.3673	0.7134	0.0839	0.0041	1.0462	0.0102	-0.0436	0.0064
Diagnoses - main ICD10: K35 Acute appendicitis	0	ukbb	European	-0.0462	0.1298	-0.3562	0.7217	0.0024	0.0014	1.0045	0.007	-0.002	0.0056
Diagnoses - main ICD10: R04 Haemorrhage from respiratory passages	0	ukbb	European	0.0361	0.1025	0.352	0.7248	0.003	0.0015	0.9965	0.0064	-0.0056	0.0054
Pulse rate_ automated reading	0	ukbb	European	-0.0089	0.0254	-0.351	0.7256	0.1568	0.0126	1.0487	0.0316	0.0324	0.0072
Lung cancer (all)	24880342	cancer	European	0.0203	0.0579	0.3508	0.7257	0.1313	0.0301	1.0074	0.0082	0.0008	0.0053
Relative age of first facial hair	0	ukbb	European	-0.0114	0.0326	-0.3482	0.7277	0.1255	0.0083	1.0465	0.0155	0.0029	0.0069
Forced Vital capacity(FVC)	26635082	lung_function	European	-0.0156	0.0449	-0.3467	0.7288	0.15	0.0162	0.9841	0.0068	-0.0014	0.0048
Total cholesterol in LDL	27005778	metabolites	European	0.0324	0.0936	0.3459	0.7294	0.0642	0.051	1.0163	0.0243	0.001	0.0058
Diagnoses - main ICD10: K51 Ulcerative colitis	0	ukbb	European	0.0322	0.0941	0.3426	0.7319	0.0049	0.0016	1.0137	0.0068	-0.0072	0.0056
Illnesses of mother: None of the above (group 2)	0	ukbb	European	-0.0187	0.0553	-0.3383	0.7351	0.0093	0.0017	0.9994	0.0066	-0.0007	0.0052
Hearing aid user	0	ukbb	European	-0.0194	0.0584	-0.3319	0.74	0.0171	0.0027	1.0053	0.0068	0.0001	0.0052
Total cholesterol in medium LDL	27005778	metabolites	European	0.03	0.0932	0.3218	0.7476	0.064	0.0474	1.0153	0.0224	0.0011	0.0059
Medication for cholesterol_ blood pressure or diabetes: Blood pressure medication	0	ukbb	European	0.0112	0.0354	0.3149	0.7528	0.1052	0.0056	1.0333	0.0102	-0.005	0.0065
22:6 docosahexaenoic acid	27005778	metabolites	European	0.0249	0.0795	0.3135	0.7539	0.1378	0.0377	0.9952	0.0075	0.0007	0.0051
Diagnoses - main ICD10: S52 Fracture of forearm	0	ukbb	European	0.0267	0.0867	0.3086	0.7576	0.0064	0.0017	1.0013	0.007	-0.0096	0.0059
Crohns disease	26192919	autoimmune	European	0.0118	0.0384	0.3076	0.7584	0.5147	0.0582	1.0221	0.0116	0.0027	0.0053
Illnesses of mother: Heart disease	0	ukbb	European	0.0153	0.0499	0.306	0.7596	0.0159	0.002	1.0124	0.0071	-0.002	0.0052
Diagnoses - main ICD10: C50 Malignant neoplasm of breast	0	ukbb	European	0.0196	0.0641	0.305	0.7604	0.0092	0.0017	1.0036	0.0079	0.0058	0.0056
Smoking/smokers in household	0	ukbb	European	0.02	0.0662	0.3029	0.762	0.0099	0.0019	1.0129	0.0072	0.0027	0.0052
Fathers age at death	27015805	aging	European	-0.0176	0.0582	-0.3022	0.7625	0.0411	0.0068	1.0176	0.0068	-0.0038	0.0052
Fluid intelligence score	0	ukbb	European	-0.0084	0.0281	-0.3006	0.7637	0.2385	0.0103	1.0443	0.0102	0.0113	0.006
Mean Caudate	25607358	brain_volume	European	0.0168	0.0561	0.3001	0.7641	0.2477	0.0387	0.9674	0.0066	-0.0024	0.0055
Mean Putamen	25607358	brain_volume	European	-0.0173	0.058	-0.2985	0.7653	0.3104	0.0478	0.9479	0.0071	-0.0037	0.0055
Non-cancer illness code_ self-reported: bone disorder	0	ukbb	European	0.0362	0.1219	0.297	0.7664	0.0018	0.0012	1.0037	0.0064	0.0001	0.005
Diagnoses - main ICD10: M70 Soft tissue disorders related to use_ overuse and pressure	0	ukbb	European	0.0246	0.0835	0.2951	0.7679	0.0042	0.0014	0.9819	0.0068	0.0022	0.0051
Diagnoses - main ICD10: R11 Nausea and vomiting	0	ukbb	European	-0.0507	0.1774	-0.286	0.7749	0.0013	0.0013	0.9948	0.006	0.0012	0.0055
Non-cancer illness code_ self-reported: gastro-oesophageal reflux (gord) / gastric reflux	0	ukbb	European	-0.015	0.0525	-0.2858	0.775	0.0112	0.0016	1.0146	0.0071	-0.0048	0.0051
Diagnoses - main ICD10: K43 Ventral hernia	0	ukbb	European	-0.0231	0.0811	-0.2848	0.7758	0.0055	0.0014	0.9926	0.0067	0.0007	0.0057
Knee pain for 3+ months	0	ukbb	European	-0.0224	0.0789	-0.2837	0.7766	0.0252	0.0072	1.0012	0.0067	0.0073	0.0056
Mothers age at death	27015805	aging	European	0.019	0.0681	0.2787	0.7805	0.0358	0.0072	1.014	0.0073	-0.0003	0.0054
Diagnoses - main ICD10: M21 Other acquired deformities of limbs	0	ukbb	European	0.1842	0.6639	0.2774	0.7815	0.0004	0.0012	1.0084	0.0067	-0.002	0.0051
Diagnoses - main ICD10: C44 Other malignant neoplasms of skin	0	ukbb	European	0.0159	0.0579	0.2739	0.7842	0.01	0.0024	1.0107	0.0084	-0.0036	0.005
Mineral and other dietary supplements: Selenium	0	ukbb	European	-0.0221	0.0817	-0.2709	0.7865	0.0066	0.0015	1.0001	0.0071	-0.0027	0.0056
Number of days/week of moderate physical activity 10+ minutes	0	ukbb	European	-0.0101	0.0377	-0.2674	0.7892	0.0413	0.0026	1.0153	0.0083	-0.0174	0.0067
ICV	25607358	brain_volume	European	0.0195	0.0734	0.2661	0.7902	0.1734	0.0428	1.0035	0.0069	0.0025	0.006
Phospholipids in medium HDL	27005778	metabolites	European	0.0229	0.0862	0.2653	0.7908	0.0635	0.0229	0.997	0.0078	-0.0081	0.0049
Diagnoses - main ICD10: T84 Complications of internal orthopaedic prosthetic devices_ implants and grafts	0	ukbb	European	0.0246	0.0929	0.265	0.791	0.0052	0.0016	0.9909	0.0071	0.002	0.0054
Phospholipids in medium LDL	27005778	metabolites	European	0.023	0.089	0.2591	0.7956	0.0679	0.0422	1.0105	0.0192	0.0033	0.0057
Other eye problems	0	ukbb	European	-0.0175	0.0685	-0.2561	0.7979	0.0088	0.0016	1.0254	0.0069	-0.0033	0.0055
Total cholesterol in IDL	27005778	metabolites	European	0.0239	0.0939	0.254	0.7995	0.0676	0.0477	1.0212	0.0203	-0.0019	0.0057
Phospholipids in large LDL	27005778	metabolites	European	0.0229	0.094	0.2438	0.8074	0.0586	0.0448	1.0194	0.0218	0.0003	0.0057
Pain type(s) experienced in last month: Facial pain	0	ukbb	European	0.0188	0.0776	0.2421	0.8087	0.0067	0.0014	0.9983	0.007	-0.0044	0.0055
Medication for pain relief_ constipation_ heartburn: Laxatives (e.g. Dulcolax_ Senokot)	0	ukbb	European	-0.0128	0.0528	-0.2417	0.809	0.0118	0.0016	1.0093	0.0067	-0.0122	0.0052
Total cholesterol in large LDL	27005778	metabolites	European	0.0206	0.0918	0.2246	0.8223	0.063	0.0473	1.017	0.0232	0.0005	0.0058
Diagnoses - main ICD10: K44 Diaphragmatic hernia	0	ukbb	European	-0.0191	0.0862	-0.2214	0.8247	0.0047	0.0013	1.006	0.0062	-0.0048	0.0055
Forced expiratory volume in 1 second (FEV1)	28166213	lung_function	European	0.0081	0.0366	0.2212	0.825	0.27	0.0178	0.9705	0.0078	-0.0049	0.0055
Diagnoses - main ICD10: Z80 Family history of malignant neoplasm	0	ukbb	European	0.0313	0.1447	0.2162	0.8288	0.0015	0.0014	0.99	0.0063	0.0045	0.0053
Back pain for 3+ months	0	ukbb	European	0.0148	0.0691	0.2141	0.8305	0.039	0.0061	0.9934	0.0068	0.0086	0.0053
Mean Pallidum	25607358	brain_volume	European	0.0153	0.0721	0.2116	0.8324	0.1664	0.0435	0.9784	0.0073	-0.0048	0.0058
Autism spectrum disorder	0	psychiatric	European	-0.0116	0.0578	-0.2001	0.8414	0.4528	0.0552	0.9652	0.0071	0.0038	0.0052
Diagnoses - main ICD10: J34 Other disorders of nose and nasal sinuses	0	ukbb	European	0.0216	0.1079	0.2001	0.8414	0.0026	0.0014	1.0077	0.006	0.0012	0.0053
Medication for cholesterol_ blood pressure or diabetes: Insulin	0	ukbb	European	0.0169	0.0862	0.1962	0.8445	0.0089	0.0032	1.0114	0.0073	-0.0073	0.0053
Non-cancer illness code_ self-reported: anxiety/panic attacks	0	ukbb	European	-0.0147	0.0791	-0.1862	0.8523	0.0062	0.0013	0.9984	0.0059	-0.0002	0.0061
Ever manic/hyper for 2 days	0	ukbb	European	-0.0125	0.0689	-0.1812	0.8562	0.0185	0.0046	0.9955	0.0064	0.001	0.0052
Cancer code_ self-reported: squamous cell carcinoma	0	ukbb	European	-0.0208	0.1171	-0.1774	0.8592	0.0025	0.0013	0.9991	0.0065	-0.0012	0.0058
Age at last live birth	0	ukbb	European	-0.0065	0.0394	-0.166	0.8681	0.0882	0.0063	1.0178	0.0089	-0.0013	0.0059
Mouth/teeth dental problems: Loose teeth	0	ukbb	European	-0.0097	0.0593	-0.1639	0.8698	0.0148	0.0017	1.0107	0.007	0.0026	0.0062
Handedness (chirality/laterality): Use both right and left hands equally	0	ukbb	European	-0.013	0.0802	-0.1618	0.8714	0.0045	0.0013	1.0049	0.0062	-0.0085	0.0049
Eye problems/disorders: Injury or trauma resulting in loss of vision	0	ukbb	European	0.0298	0.1916	0.1556	0.8764	0.0025	0.0042	1.0108	0.0061	0.0078	0.0051
Diagnoses - main ICD10: K40 Inguinal hernia	0	ukbb	European	0.0079	0.0525	0.1496	0.881	0.0186	0.0022	0.9912	0.0071	-0.0137	0.0058
Diagnoses - main ICD10: K57 Diverticular disease of intestine	0	ukbb	European	0.008	0.0538	0.1493	0.8813	0.0132	0.0016	1.0028	0.0069	-0.0056	0.0054
Friendships satisfaction	0	ukbb	European	-0.0061	0.0414	-0.1463	0.8837	0.0622	0.0053	0.9983	0.0072	-0.0022	0.0052
Forced expiratory volume in 1 second (FEV1)	26635082	lung_function	European	0.0064	0.0445	0.1441	0.8855	0.1448	0.0164	0.9908	0.007	-0.0076	0.0048
Number of children fathered	0	ukbb	European	-0.0076	0.0535	-0.1418	0.8873	0.0314	0.0037	1.0118	0.007	0.0132	0.0056
Most recent bowel cancer screening	0	ukbb	European	-0.0167	0.1218	-0.137	0.891	0.0106	0.0065	1.013	0.0063	0.0057	0.0057
Daytime dozing / sleeping (narcolepsy)	0	ukbb	European	0.0044	0.0336	0.1307	0.896	0.0485	0.0028	1.0114	0.0093	0.0022	0.0061
Mean Hippocampus	25607358	brain_volume	European	-0.0117	0.0918	-0.1273	0.8987	0.1312	0.0389	0.9889	0.0067	0.0002	0.0056
Non-cancer illness code_ self-reported: hypertension	0	ukbb	European	-0.0036	0.0288	-0.1255	0.9001	0.1166	0.0049	1.0555	0.0164	-0.0013	0.0072
Non-cancer illness code_ self-reported: hypothyroidism/myxoedema	0	ukbb	European	0.0048	0.039	0.1236	0.9017	0.0516	0.0059	1.0294	0.0145	-0.0141	0.0066
Diagnoses - main ICD10: M67 Other disorders of synovium and tendon	0	ukbb	European	-0.0122	0.1014	-0.1206	0.904	0.0025	0.0013	0.9972	0.0066	0.0065	0.0051
Illnesses of mother: Breast cancer	0	ukbb	European	-0.0066	0.0575	-0.1144	0.9089	0.01	0.002	1.0055	0.008	-0.0012	0.0057
Non-cancer illness code_ self-reported: type 2 diabetes	0	ukbb	European	-0.0075	0.0732	-0.1028	0.9181	0.0064	0.0014	1.0121	0.0071	0.0072	0.0048
Duration of walks	0	ukbb	European	0.0034	0.036	0.0953	0.924	0.0462	0.003	1.0101	0.0089	-0.0112	0.0062
Non-cancer illness code_ self-reported: allergy or anaphylactic reaction to drug	0	ukbb	European	-0.021	0.2315	-0.0908	0.9277	0.0006	0.0013	1.0099	0.0062	-0.0009	0.0051
Medication for cholesterol_ blood pressure_ diabetes_ or take exogenous hormones: Hormone replacement therapy	0	ukbb	European	0.0058	0.0649	0.0889	0.9292	0.0159	0.0029	1.0001	0.0065	-0.0138	0.0054
Duration walking for pleasure	0	ukbb	European	-0.0037	0.0433	-0.0863	0.9312	0.0257	0.0026	1.0113	0.0076	-0.0046	0.0057
Free cholesterol in large LDL	27005778	metabolites	European	0.0077	0.0915	0.0846	0.9326	0.0612	0.0489	1.0194	0.0242	-0.0006	0.0058
Diagnoses - main ICD10: M54 Dorsalgia	0	ukbb	European	-0.0052	0.0643	-0.0812	0.9353	0.0101	0.0016	1.0052	0.0076	0.008	0.0061
Diagnoses - main ICD10: D25 Leiomyoma of uterus	0	ukbb	European	0.0058	0.0736	0.0794	0.9367	0.0061	0.0015	0.9917	0.007	-0.0059	0.0051
Distance between home and job workplace	0	ukbb	European	-0.0063	0.081	-0.0774	0.9383	0.0124	0.0031	1.0054	0.0069	-0.0019	0.0058
Transport type for commuting to job workplace: Cycle	0	ukbb	European	-0.0034	0.0463	-0.0734	0.9415	0.0315	0.003	1.0153	0.0075	-0.0133	0.006
Reproduciblity of spirometry measurement using ERS/ATS criteria	0	ukbb	European	-0.0052	0.0713	-0.0728	0.942	0.0145	0.0022	1.008	0.0067	-0.0127	0.0057
Non-cancer illness code_ self-reported: osteoporosis	0	ukbb	European	0.0043	0.0612	0.071	0.9434	0.015	0.0021	1.0013	0.0079	-0.0239	0.0064
Diagnoses - main ICD10: R35 Polyuria	0	ukbb	European	0.0074	0.1101	0.0677	0.9461	0.0028	0.0015	0.9997	0.0065	0.0072	0.0053
Pack years of smoking PREVIEW ONLY	0	ukbb	European	0.0025	0.0386	0.0653	0.948	0.1097	0.0101	1.0155	0.0097	0.0033	0.0059
Diagnoses - main ICD10: K76 Other diseases of liver	0	ukbb	European	-0.0065	0.1046	-0.0621	0.9504	0.0032	0.0013	0.9949	0.0065	0.0017	0.0055
Non-cancer illness code_ self-reported: hiatus hernia	0	ukbb	European	-0.004	0.0692	-0.0581	0.9536	0.0081	0.0013	1.0334	0.0063	-0.0043	0.0055
Tinnitus: Yes_ now most or all of the time	0	ukbb	European	-0.0031	0.0556	-0.0551	0.956	0.034	0.0048	1.0017	0.0068	-0.0137	0.005
Non-cancer illness code_ self-reported: vitiligo	0	ukbb	European	0.0083	0.1663	0.0501	0.96	0.0011	0.0013	0.995	0.0065	-0.0021	0.0049
Length of menstrual cycle	0	ukbb	European	-0.0025	0.0585	-0.0431	0.9657	0.1075	0.0204	0.998	0.0068	0.0026	0.0054
Diagnoses - main ICD10: Z09 Follow-up examination after treatment for conditions other than malignant neoplasms	0	ukbb	European	-0.004	0.096	-0.0419	0.9666	0.0026	0.0014	0.9995	0.0066	-0.0033	0.0046
Non-cancer illness code_ self-reported: glaucoma	0	ukbb	European	-0.0023	0.0567	-0.0409	0.9673	0.0113	0.0016	1.014	0.0078	-0.0002	0.0054
Diagnoses - main ICD10: K50 Crohns disease [regional enteritis]	0	ukbb	European	-0.0036	0.091	-0.0395	0.9685	0.0042	0.0014	1.0034	0.0064	0.0028	0.0054
Relative age voice broke	0	ukbb	European	0.0015	0.0397	0.0387	0.9691	0.0742	0.0051	1.0111	0.0084	-0.0053	0.0064
Illnesses of mother: Alzheimers disease/dementia	0	ukbb	European	0.0032	0.0927	0.035	0.9721	0.0042	0.0047	1.0345	0.0356	-0.0008	0.0062
Taking other prescription medications	0	ukbb	European	0.001	0.0344	0.0303	0.9758	0.0433	0.0024	1.015	0.008	0.0023	0.0057
Omega-3 fatty acids	27005778	metabolites	European	-0.0018	0.0719	-0.0257	0.9795	0.1582	0.0428	0.991	0.0075	0.0062	0.0052
Parents age at death	27015805	aging	European	-0.0018	0.0698	-0.0254	0.9797	0.03	0.007	1.0174	0.0067	-0.0034	0.0053
Vascular/heart problems diagnosed by doctor: High blood pressure	0	ukbb	European	-0.0006	0.0289	-0.0217	0.9827	0.1183	0.0049	1.0607	0.0164	-0.0003	0.0072
Diagnoses - main ICD10: K29 Gastritis and duodenitis	0	ukbb	European	0.0012	0.0734	0.0167	0.9867	0.0073	0.0014	1.0054	0.0065	-0.0141	0.0059
Ever had stillbirth_ spontaneous miscarriage or termination	0	ukbb	European	0.0011	0.0651	0.0165	0.9868	0.0201	0.0032	0.9947	0.0076	0.0027	0.0059
Chest pain or discomfort	0	ukbb	European	-0.0005	0.0386	-0.0135	0.9892	0.0333	0.0021	1.015	0.0073	0.0034	0.005
Number of depression episodes	0	ukbb	European	-0.0012	0.0895	-0.0129	0.9897	0.0342	0.0118	1.0037	0.0063	0.0044	0.0054
Pain type(s) experienced in last month: Neck or shoulder pain	0	ukbb	European	0.0004	0.0376	0.0107	0.9914	0.0335	0.002	1.0214	0.0076	-0.007	0.006
Cough on most days	0	ukbb	European	-0.0003	0.0609	-0.0057	0.9954	0.0484	0.0062	0.9996	0.0071	0.002	0.0055
Lung cancer	27488534	cancer	European	-0.0002	0.0475	-0.0049	0.9961	0.3257	0.0678	1.0135	0.0073	0.005	0.0048
Types of transport used (excluding work): Public transport	0	ukbb	European	-0.0001	0.047	-0.0028	0.9978	0.0223	0.0018	1.0256	0.0069	0.015	0.0057
Diagnoses - main ICD10: H25 Senile cataract	0	ukbb	European	-7.11e-05	0.1069	-0.0007	0.9995	0.0034	0.0015	1.0123	0.0068	0.0031	0.0056
Vitamin and mineral supplements: Vitamin B	0	ukbb	European	-3.46e-05	0.0717	-0.0005	0.9996	0.0072	0.0016	1.0001	0.007	-0.0291	0.006
Length of working week for main job	0	ukbb	European	-1.62e-05	0.0569	-0.0003	0.9998	0.0201	0.0029	1.0072	0.0066	0.0057	0.0056
Non-cancer illness code_ self-reported: chronic obstructive airways disease/copd	0	ukbb	European	1.04e-05	0.0765	0.0001	0.9999	0.0057	0.0014	0.9933	0.0067	0.003	0.0055
rg: genetic correlation estimate; se: standard error; z: Z score; p: P-value for genetic correlation; h2_obs: SNP heritability; h2_obs_se: standard error of the SNP heritability.
