# Supplementary material for: GWAS for urinary sodium and potassium excretion highlights pathways shared with cardiovascular traits
Source: Nat Commun. 2019 Aug 13;10:3653. doi: 10.1038/s41467-019-11451-y (PMC6692500; doi:10.1038/s41467-019-11451-y)
Supplement: Supplementary file 15 — Supplementary Dataset 15 [file 41467_2019_11451_MOESM15_ESM.xlsx]

## Sheet: Supplementary Data 15
	Supplementary Data 15: Association of urinary sodium loci with SBP and DBP within the UK Biobank study at p<5×10-8.
SBP	SNP*	Locus	CHR	BP	GENPOS	ALLELE1	ALLELE0	A1FREQ	INFO	CHISQ_LINREG	P_LINREG	BETA	SE	CHISQ_BOLT_LMM_INF	P_BOLT_LMM_INF	CHISQ_BOLT_LMM	P_BOLT_LMM
	rs1229984	rs1229984	4	100239319	1.13021	T	C	0.0265398	1	152.914	4e-35	-0.96268	0.111436	74.6303	5.7e-18	76.5463	2.2e-18
	rs439523	rs838133	19	49236102	0.774746	T	C	0.469759	0.997921	60.6196	6.9e-15	-0.295662	0.0363773	66.0588	4.4e-16	65.5964	5.5e-16
	rs35556055	rs2472297	15	75253414	1.00349	G	A	0.482426	0.999251	48.6516	3.1e-12	0.294238	0.0363108	65.6639	5.3e-16	67.7395	1.9e-16
	rs34307821	rs2472297	15	75256826	1.0035	C	T	0.482463	0.999558	48.459	3.4e-12	0.293779	0.0363048	65.4807	5.9e-16	67.6141	2e-16
	rs34799293	rs2472297	15	75258773	1.0035	T	C	0.482492	0.999658	48.1915	3.9e-12	0.293126	0.0363024	65.1985	6.8e-16	67.2929	2.3e-16
	rs35882241	rs2472297	15	75260773	1.0035	T	C	0.482483	0.99985	48.1004	4e-12	0.292778	0.0362992	65.0554	7.3e-16	67.1568	2.5e-16
	rs62029217	rs2472297	15	75261899	1.0035	C	T	0.482648	1	48.0932	4.1e-12	0.292889	0.0363106	65.0638	7.3e-16	67.1094	2.6e-16
	rs11878908	rs838133	19	49227443	0.774734	C	T	0.463169	0.999136	60.7893	6.4e-15	-0.293467	0.0363948	65.0188	7.4e-16	63.1494	1.9e-15
	rs4886413	rs2472297	15	75262310	1.0035	G	C	0.482473	0.999961	48.0631	4.1e-12	0.292642	0.0362973	65.0015	7.5e-16	67.111	2.6e-16
	rs8112983	rs838133	19	49229525	0.774737	T	C	0.463149	0.999391	61.0579	5.5e-15	-0.293214	0.0363867	64.9358	7.7e-16	63.0828	2e-15
	rs2287921	rs838133	19	49228272	0.774735	T	C	0.463242	1	60.7844	6.4e-15	-0.293067	0.0363813	64.8896	7.9e-16	63.0286	2e-15
	rs11666792	rs838133	19	49227043	0.774733	G	A	0.463383	0.998792	60.1405	8.8e-15	-0.29197	0.0363995	64.3408	1e-15	62.4958	2.7e-15
	rs12979891	rs838133	19	49227256	0.774733	C	T	0.463379	0.999004	60.1557	8.8e-15	-0.291953	0.0363963	64.3445	1e-15	62.4994	2.7e-15
	rs479486	rs838133	19	49229323	0.774736	G	A	0.446723	0.998912	60.9757	5.8e-15	-0.292606	0.0364947	64.2843	1.1e-15	62.7879	2.3e-15
	rs838147	rs838133	19	49246866	0.774766	A	G	0.500669	0.996832	55.6363	8.7e-14	0.290494	0.0363193	63.9735	1.3e-15	62.9708	2.1e-15
	rs838144	rs838133	19	49250239	0.7748	C	T	0.500311	0.99223	55.3616	1e-13	0.290158	0.036399	63.5465	1.6e-15	62.5988	2.5e-15
	rs1231281	rs838133	19	49239200	0.77475	G	A	0.500538	0.997463	55.292	1e-13	-0.28852	0.0363084	63.145	1.9e-15	62.0027	3.4e-15
	rs2287922	rs838133	19	49232226	0.77474	G	A	0.464242	1	59.016	1.6e-14	-0.28889	0.0363911	63.0193	2e-15	61.3018	4.9e-15
	rs418464	rs838133	19	49239026	0.77475	T	C	0.500169	0.997921	55.1983	1.1e-13	-0.288352	0.0363106	63.064	2e-15	62.0017	3.4e-15
	rs973579	rs838133	19	49241976	0.774754	A	G	0.500174	0.998485	54.929	1.2e-13	-0.287988	0.0362982	62.9473	2.1e-15	61.8556	3.7e-15
	rs35103257	rs2472297	15	75277412	1.00362	G	T	0.483555	0.990173	45.5316	1.5e-11	0.288566	0.036465	62.6236	2.5e-15	64.4346	1e-15
	rs11882796	rs838133	19	49225766	0.774731	A	T	0.458194	0.997444	58.0479	2.6e-14	-0.287984	0.0364585	62.3936	2.8e-15	60.6619	6.8e-15
	rs452270	rs838133	19	49239053	0.77475	T	C	0.503367	0.989833	54.1906	1.8e-13	-0.286527	0.0364499	61.7929	3.8e-15	60.5721	7.1e-15
	rs660745	rs838133	19	49219459	0.77471	T	C	0.455137	0.994003	57.4471	3.5e-14	-0.287158	0.0365289	61.797	3.8e-15	59.7358	1.1e-14
	rs427248	rs838133	19	49241015	0.774753	C	T	0.506173	0.98754	53.1774	3e-13	-0.286047	0.0364992	61.4198	4.6e-15	60.7423	6.5e-15
	rs380743	rs838133	19	49241014	0.774753	G	A	0.506149	0.987193	53.0809	3.2e-13	-0.28587	0.0365067	61.3189	4.9e-15	60.6244	6.9e-15
	rs11672900	rs838133	19	49220323	0.774713	A	G	0.455861	0.994585	54.2551	1.8e-13	-0.28052	0.0365257	58.9838	1.6e-14	57.0031	4.4e-14
	rs516246	rs838133	19	49206172	0.774556	C	T	0.491911	1	51.3017	7.9e-13	-0.277662	0.0362646	58.623	1.9e-14	57.6047	3.2e-14
	rs681343	rs838133	19	49206462	0.774557	C	T	0.491916	1	51.137	8.6e-13	-0.277593	0.0362612	58.605	1.9e-14	57.6138	3.2e-14
	rs516316	rs838133	19	49206145	0.774556	G	C	0.491908	0.999916	51.0203	9.1e-13	-0.276905	0.0362653	58.3011	2.2e-14	57.277	3.8e-14
	rs601338	rs838133	19	49206674	0.77456	G	A	0.491937	1	50.5716	1.1e-12	-0.276805	0.0362678	58.2512	2.3e-14	57.276	3.8e-14
	rs679574	rs838133	19	49206108	0.774555	C	G	0.491913	0.999784	50.9809	9.3e-13	-0.276784	0.0362675	58.2435	2.3e-14	57.2222	3.9e-14
	rs492602	rs838133	19	49206417	0.774557	A	G	0.491986	1	51.0102	9.2e-13	-0.276328	0.0362654	58.0583	2.5e-14	57.1015	4.1e-14
	rs12979278	rs838133	19	49218602	0.774706	C	T	0.453772	0.99309	51.6971	6.5e-13	-0.277234	0.0365682	57.4756	3.4e-14	56.0861	6.9e-14
	rs3859439	rs838133	19	49224389	0.774728	T	C	0.390847	0.996159	55.1618	1.1e-13	-0.282361	0.0372312	57.5169	3.4e-14	55.9525	7.4e-14
	rs519757	rs838133	19	49224966	0.774729	A	C	0.390555	0.995917	54.3485	1.7e-13	-0.28192	0.0372391	57.3128	3.7e-14	55.8693	7.7e-14
	rs629504	rs838133	19	49223633	0.774726	C	G	0.391068	0.996521	54.8363	1.3e-13	-0.281659	0.0372219	57.2598	3.8e-14	55.6946	8.5e-14
	rs8103840	rs838133	19	49254955	0.774859	C	T	0.532377	0.977853	49.4669	2e-12	0.277094	0.0367238	56.932	4.5e-14	57.6305	3.2e-14
	rs546308	rs838133	19	49223570	0.774726	G	A	0.391691	0.996262	54.2577	1.8e-13	-0.279888	0.0372159	56.5604	5.4e-14	54.9817	1.2e-13
	rs569970	rs838133	19	49207718	0.774571	T	C	0.465834	0.99963	46.4482	9.4e-12	-0.272192	0.0363781	55.985	7.3e-14	55.1051	1.1e-13
	rs570794	rs838133	19	49207651	0.77457	T	C	0.465831	0.999645	46.4574	9.4e-12	-0.272215	0.0363779	55.9952	7.3e-14	55.1156	1.1e-13
	rs571689	rs838133	19	49207554	0.774569	C	T	0.465829	0.999669	46.4357	9.5e-12	-0.272171	0.0363774	55.9785	7.3e-14	55.1053	1.1e-13
	rs506897	rs838133	19	49208629	0.77458	G	C	0.465957	0.999864	46.2947	1e-11	-0.271458	0.0363737	55.6968	8.5e-14	54.8331	1.3e-13
	rs503279	rs838133	19	49209010	0.774582	T	C	0.465955	1	46.2032	1.1e-11	-0.271102	0.036373	55.553	9.1e-14	54.7033	1.4e-13
	rs507855	rs838133	19	49208501	0.774579	A	G	0.467101	0.996936	46.197	1.1e-11	-0.271334	0.036421	55.5015	9.3e-14	54.6637	1.4e-13
	rs485073	rs838133	19	49207255	0.774566	A	G	0.465434	0.995572	45.1198	1.9e-11	-0.271396	0.0364584	55.4128	9.8e-14	54.69	1.4e-13
	rs507711	rs838133	19	49208564	0.774579	C	T	0.467128	0.996847	46.1269	1.1e-11	-0.271123	0.0364228	55.4097	9.8e-14	54.5367	1.5e-13
	rs838145	rs838133	19	49248730	0.774782	G	A	0.45735	0.986765	46.1672	1.1e-11	0.272639	0.0366415	55.3644	1e-13	55.5071	9.3e-14
	rs504963	rs838133	19	49208865	0.774581	G	A	0.466166	1	45.7297	1.4e-11	-0.270172	0.0363727	55.1731	1.1e-13	54.3039	1.7e-13
	rs507766	rs838133	19	49208543	0.774579	T	C	0.467152	0.996846	45.9841	1.2e-11	-0.270738	0.0364223	55.2542	1.1e-13	54.39	1.6e-13
	rs603985	rs838133	19	49207257	0.774566	T	C	0.465494	0.995591	44.7743	2.2e-11	-0.27067	0.0364591	55.1146	1.1e-13	54.4023	1.6e-13
	rs602662	rs838133	19	49206985	0.774562	G	A	0.464684	1	45.2464	1.7e-11	-0.26946	0.0363752	54.8751	1.3e-13	54.0838	1.9e-13
	rs2251034	rs838133	19	49207792	0.774572	G	A	0.466457	0.999601	45.4786	1.5e-11	-0.269047	0.0363747	54.7086	1.4e-13	54.0077	2e-13
	rs838133	rs838133	19	49259529	0.775042	A	G	0.450872	0.938588	50.6599	1.1e-12	0.277813	0.0375631	54.6993	1.4e-13	54.231	1.8e-13
	rs12978750	rs838133	19	49218430	0.774705	A	G	0.452573	0.993452	48.2341	3.8e-12	-0.269749	0.036577	54.3884	1.6e-13	53.015	3.3e-13
	rs12978752	rs838133	19	49218437	0.774705	A	C	0.452563	0.993428	48.2683	3.7e-12	-0.269807	0.0365773	54.4107	1.6e-13	53.0402	3.3e-13
	rs633372	rs838133	19	49209226	0.774583	G	A	0.466554	0.999606	45.3339	1.7e-11	-0.268345	0.0363753	54.4218	1.6e-13	53.6797	2.4e-13
	rs2548459	rs838133	19	49209339	0.774584	T	C	0.466849	0.999045	45.4596	1.6e-11	-0.26831	0.0363843	54.3807	1.7e-13	53.6659	2.4e-13
	rs485186	rs838133	19	49207206	0.774565	A	G	0.463529	1	44.6973	2.3e-11	-0.268118	0.0363868	54.2954	1.7e-13	53.6202	2.4e-13
	rs33988101	rs838133	19	49218111	0.774704	G	T	0.452573	0.993747	48.0691	4.1e-12	-0.269366	0.0365718	54.2494	1.8e-13	52.9017	3.5e-13
	rs4002471	rs838133	19	49215095	0.774689	C	T	0.452149	0.994786	47.1637	6.5e-12	-0.267674	0.036559	53.6074	2.4e-13	52.2508	4.9e-13
	rs632111	rs838133	19	49208978	0.774582	A	G	0.466794	0.999741	44.5487	2.5e-11	-0.266183	0.0363708	53.5617	2.5e-13	52.8735	3.6e-13
	rs646327	rs838133	19	49209851	0.774586	A	G	0.471647	0.997813	43.5697	4.1e-11	-0.265942	0.0363901	53.4083	2.7e-13	52.3057	4.8e-13
	rs692854	rs838133	19	49209464	0.774584	C	A	0.467628	0.999076	44.0597	3.2e-11	-0.265514	0.0363778	53.2723	2.9e-13	52.373	4.6e-13
	rs281379	rs838133	19	49214274	0.774684	G	A	0.476408	1	43.1455	5.1e-11	-0.263276	0.0363556	52.4422	4.4e-13	51.2754	8e-13
	rs1704773	rs838133	19	49209566	0.774585	A	G	0.468202	0.998842	43.2541	4.8e-11	-0.262459	0.0363775	52.0541	5.4e-13	51.3129	7.9e-13
	rs35116156	rs2472297	15	75292074	1.00366	C	T	0.500655	0.999267	36.0985	1.9e-09	0.260045	0.0362837	51.3659	7.7e-13	52.6811	3.9e-13
	rs35106244	rs838133	19	49203829	0.774545	C	T	0.537576	0.947013	42.4175	7.4e-11	-0.266855	0.0374052	50.8966	9.7e-13	50.2909	1.3e-12
	rs12898551	rs2472297	15	75297907	1.00366	C	G	0.52617	0.998903	36.1604	1.8e-09	0.257664	0.0363576	50.2245	1.4e-12	51.5039	7.1e-13
	rs12900072	rs2472297	15	75307148	1.00367	G	A	0.526405	0.998646	36.2056	1.8e-09	0.257317	0.0363648	50.0698	1.5e-12	51.2752	8e-13
	rs4886648	rs2472297	15	75308837	1.00367	G	A	0.526137	0.998335	35.2013	3e-09	0.255904	0.0363703	49.5064	2e-12	50.6845	1.1e-12
	rs3812945	rs2472297	15	75289722	1.00366	T	C	0.517122	1	34.689	3.9e-09	0.254862	0.0362918	49.3167	2.2e-12	51.0513	9e-13
	rs676388	rs838133	19	49211969	0.774634	T	C	0.466582	1	40.5565	1.9e-10	-0.253951	0.0363722	48.7486	2.9e-12	47.5676	5.3e-12
	rs2638282	rs838133	19	49213833	0.774675	G	A	0.468497	0.99793	40.7772	1.7e-10	-0.253592	0.0363992	48.5386	3.2e-12	47.6402	5.1e-12
	rs2452170	rs838133	19	49213504	0.774667	G	A	0.468499	0.997739	40.6865	1.8e-10	-0.253553	0.0364024	48.5152	3.3e-12	47.605	5.2e-12
	rs35866622	rs838133	19	49218060	0.774704	C	T	0.501719	0.990855	42.2121	8.2e-11	-0.253797	0.036449	48.4844	3.3e-12	47.9345	4.4e-12
	rs584768	rs838133	19	49213284	0.774663	G	A	0.468416	0.99771	40.5099	2e-10	-0.253043	0.0364026	48.3199	3.6e-12	47.4169	5.7e-12
	rs113362184	rs2472297	15	75349999	1.00371	T	C	0.530281	0.995648	34.2127	4.9e-09	0.24885	0.0364431	46.6277	8.6e-12	47.7627	4.8e-12
	rs10457481	rs10457480	6	126813721	1.32699	G	A	0.697814	0.995327	29.4431	5.8e-08	0.269372	0.0394978	46.5116	9.1e-12	45.3807	1.6e-11
	rs10457480	rs10457480	6	126812609	1.32699	C	G	0.697787	0.995334	29.2209	6.5e-08	0.268914	0.0394963	46.3567	9.9e-12	45.2293	1.8e-11
	rs7181261	rs2472297	15	75355583	1.00372	G	T	0.530831	0.995842	33.8192	6e-09	0.247989	0.0364407	46.3116	1e-11	47.4309	5.7e-12
	rs56334134	rs2761589	11	31040126	0.484198	A	G	0.633028	0.985411	54.1849	1.8e-13	0.256626	0.0378067	46.0751	1.1e-11	45.4301	1.6e-11
	rs34539692	rs10457480	6	126747110	1.32695	A	C	0.68689	0.996722	28.2028	1.1e-07	0.264956	0.0390851	45.9543	1.2e-11	44.8637	2.1e-11
	rs61878206	rs2761589	11	31091953	0.484229	T	C	0.632793	0.996774	53.5292	2.5e-13	0.254411	0.0376058	45.7679	1.3e-11	45.166	1.8e-11
	rs2304902	rs2472297	15	75340727	1.00368	G	T	0.530557	0.994983	33.2016	8.3e-09	0.245863	0.0364579	45.4783	1.5e-11	46.5144	9.1e-12
	rs17425442	rs2761589	11	31118715	0.484229	C	G	0.632439	0.996891	53.3028	2.9e-13	0.253365	0.0375966	45.4147	1.6e-11	44.8379	2.1e-11
	rs1834490	rs2761589	11	31123382	0.484229	G	A	0.632546	0.996752	53.1909	3e-13	0.253225	0.0376006	45.355	1.6e-11	44.7527	2.2e-11
	rs4067330	rs2761589	11	31087870	0.484229	T	C	0.632558	0.997156	53.2513	2.9e-13	0.253453	0.0375934	45.4542	1.6e-11	44.8592	2.1e-11
	rs56402103	rs2761589	11	31106074	0.484229	T	G	0.632528	0.997166	53.2627	2.9e-13	0.25339	0.0375929	45.4327	1.6e-11	44.821	2.2e-11
	rs11824421	rs2761589	11	31064570	0.484229	T	C	0.632515	0.997267	53.1102	3.2e-13	0.253095	0.0375903	45.3333	1.7e-11	44.7418	2.2e-11
	rs1407259	rs2761589	11	31043939	0.484229	C	A	0.633725	0.996372	52.333	4.7e-13	0.253131	0.0376217	45.2702	1.7e-11	44.8515	2.1e-11
	rs61878168	rs2761589	11	31050135	0.484229	T	C	0.632521	0.997276	53.0968	3.2e-13	0.2531	0.0375903	45.3347	1.7e-11	44.7513	2.2e-11
	rs10457478	rs10457480	6	126704934	1.32693	C	G	0.687106	0.999373	27.5507	1.5e-07	0.26233	0.0390444	45.1418	1.8e-11	44.0258	3.2e-11
	rs61878209	rs2761589	11	31113275	0.484229	C	T	0.633077	0.997164	52.6471	4e-13	0.252714	0.0376072	45.1561	1.8e-11	44.6943	2.3e-11
	rs919045	rs2761589	11	31111810	0.484229	T	C	0.633098	0.997187	52.6186	4.1e-13	0.252642	0.0376072	45.1303	1.8e-11	44.6738	2.3e-11
	rs1321958	rs2761589	11	31048683	0.484229	G	A	0.633075	0.997369	52.4541	4.4e-13	0.252314	0.0376036	45.0219	1.9e-11	44.5838	2.4e-11
	rs1407257	rs2761589	11	31060561	0.484229	G	T	0.632403	0.99737	52.6787	3.9e-13	0.252344	0.0375871	45.0721	1.9e-11	44.4658	2.6e-11
	rs208078	rs2761589	11	31128721	0.484304	G	T	0.366895	0.993786	53.669	2.4e-13	-0.252817	0.0376707	45.0406	1.9e-11	44.7544	2.2e-11
	rs34136780	rs2761589	11	31069793	0.484229	T	C	0.63379	0.99722	52.0128	5.5e-13	0.252616	0.03762	45.0903	1.9e-11	44.6438	2.4e-11
	rs61878204	rs2761589	11	31058768	0.484229	C	T	0.632408	0.997348	52.7085	3.9e-13	0.252436	0.0375876	45.1039	1.9e-11	44.4993	2.5e-11
	rs1407258	rs2761589	11	31059839	0.484229	T	A	0.633083	0.997368	52.4143	4.5e-13	0.252254	0.0376037	45.0003	2e-11	44.5617	2.5e-11
	rs2194923	rs2761589	11	31066611	0.484229	G	A	0.632419	0.997338	52.7371	3.8e-13	0.25218	0.0375875	45.0127	2e-11	44.421	2.6e-11
	rs78986775	rs2761589	11	31055942	0.484229	C	T	0.633083	0.997368	52.4135	4.5e-13	0.252252	0.0376037	44.9995	2e-11	44.5609	2.5e-11
	rs12202204	rs10457480	6	126686407	1.32693	A	G	0.686245	1	26.9659	2.1e-07	0.261369	0.0390201	44.8675	2.1e-11	43.726	3.8e-11
	rs1964699	rs2761589	11	31090390	0.484229	T	C	0.633946	0.996807	51.571	6.9e-13	0.251521	0.0376278	44.6818	2.3e-11	44.2172	2.9e-11
	rs4886417	rs2472297	15	75330159	1.00368	T	G	0.529843	0.996597	32.0054	1.5e-08	0.243615	0.0364242	44.733	2.3e-11	46.0231	1.2e-11
	rs17333520	rs2761589	11	31058834	0.484229	C	T	0.633913	0.997062	51.2607	8.1e-13	0.250952	0.0376229	44.4915	2.6e-11	44.0241	3.2e-11
	rs12979144	rs838133	19	49237547	0.774748	G	A	0.585233	0.99752	43.9539	3.4e-11	0.244616	0.0368628	44.0344	3.2e-11	43.7589	3.7e-11
	rs281408	rs838133	19	49233406	0.774742	C	A	0.585475	1	44.5948	2.4e-11	0.244374	0.0368286	44.0292	3.2e-11	43.6811	3.9e-11
	rs12978499	rs838133	19	49237552	0.774748	A	C	0.58524	0.99752	43.8685	3.5e-11	0.244508	0.0368629	43.9953	3.3e-11	43.7046	3.8e-11
	rs412712	rs838133	19	49234299	0.774743	A	T	0.585353	0.999429	44.6521	2.4e-11	0.244239	0.036835	43.9653	3.3e-11	43.6596	3.9e-11
	rs2307018	rs838133	19	49244219	0.774757	C	A	0.572222	0.999818	42.0353	9e-11	0.243002	0.0366561	43.9466	3.4e-11	43.5433	4.1e-11
	rs12460295	rs838133	19	49247124	0.774767	T	G	0.572677	0.996934	41.2768	1.3e-10	0.24257	0.0367063	43.6708	3.9e-11	43.3587	4.6e-11
	rs12462324	rs838133	19	49247086	0.774767	A	G	0.572682	0.996985	41.2869	1.3e-10	0.242519	0.0367054	43.6549	3.9e-11	43.3447	4.6e-11
	rs8102032	rs838133	19	49249795	0.774795	C	T	0.572475	0.992593	40.9776	1.5e-10	0.243001	0.0367768	43.6587	3.9e-11	43.3761	4.5e-11
	rs8104897	rs838133	19	49249814	0.774795	C	A	0.572464	0.992544	40.9582	1.6e-10	0.2429	0.0367775	43.6206	4e-11	43.3363	4.6e-11
	rs2307019	rs838133	19	49244220	0.774757	G	A	0.572192	1	41.8462	9.9e-11	0.241983	0.0366562	43.579	4.1e-11	43.1418	5.1e-11
	rs8105137	rs838133	19	49249888	0.774796	G	A	0.572477	0.992448	40.8534	1.6e-10	0.242622	0.0367789	43.5171	4.2e-11	43.2352	4.9e-11
	rs12611201	rs838133	19	49248255	0.774777	G	A	0.572621	0.995368	41.1748	1.4e-10	0.242176	0.0367312	43.4701	4.3e-11	43.1826	5e-11
	rs11083948	rs838133	19	49248120	0.774775	A	G	0.572621	0.995623	41.0959	1.4e-10	0.241969	0.0367272	43.4054	4.4e-11	43.1177	5.2e-11
	rs11672046	rs838133	19	49247601	0.774771	C	T	0.572581	0.996419	41.1105	1.4e-10	0.241978	0.0367133	43.4416	4.4e-11	43.1522	5.1e-11
	rs12982115	rs838133	19	49248640	0.774781	A	G	0.572726	0.994675	40.5623	1.9e-10	0.242073	0.0367421	43.4074	4.4e-11	43.1092	5.2e-11
	rs8108136	rs838133	19	49247693	0.774771	C	T	0.572578	0.996288	41.1098	1.4e-10	0.24197	0.0367155	43.4333	4.4e-11	43.141	5.1e-11
	rs8108468	rs838133	19	49247786	0.774772	G	A	0.572585	0.996175	41.0932	1.5e-10	0.241945	0.0367175	43.4199	4.4e-11	43.1318	5.1e-11
	rs8111208	rs838133	19	49248022	0.774774	A	C	0.572602	0.995758	41.1206	1.4e-10	0.241998	0.0367242	43.4227	4.4e-11	43.1283	5.1e-11
	rs8111288	rs838133	19	49247900	0.774773	G	A	0.572598	0.996009	41.1193	1.4e-10	0.242006	0.0367203	43.4352	4.4e-11	43.1357	5.1e-11
	rs8111399	rs838133	19	49247963	0.774774	G	T	0.572596	0.995868	41.1042	1.4e-10	0.241966	0.0367223	43.4159	4.4e-11	43.1258	5.1e-11
	rs12611203	rs838133	19	49248295	0.774777	G	A	0.572613	0.995269	41.0398	1.5e-10	0.241803	0.0367328	43.3329	4.6e-11	43.0574	5.3e-11
	rs12611211	rs838133	19	49248331	0.774778	G	A	0.57265	0.995148	41.0542	1.5e-10	0.241885	0.0367347	43.3576	4.6e-11	43.0825	5.2e-11
	rs28400015	rs838133	19	49250633	0.774805	G	A	0.572563	0.991336	40.4545	2e-10	0.242041	0.0367978	43.2647	4.8e-11	42.9491	5.6e-11
	rs12975033	rs838133	19	49249443	0.774791	A	T	0.571944	0.993328	39.9664	2.6e-10	0.240011	0.0367596	42.6305	6.6e-11	42.3093	7.8e-11
	rs281377	rs838133	19	49206603	0.774558	C	T	0.569625	1	37.6591	8.4e-10	0.238087	0.0366597	42.1787	8.3e-11	41.1323	1.4e-10
	rs56066508	rs838133	19	49241400	0.774753	C	T	0.570387	0.998175	39.931	2.6e-10	0.237145	0.0366584	41.8486	9.9e-11	41.2296	1.4e-10
	rs8106205	rs838133	19	49250197	0.774799	T	C	0.556568	0.992027	38.3542	5.9e-10	0.236164	0.0366295	41.5685	1.1e-10	40.773	1.7e-10
	rs28400014	rs838133	19	49250657	0.774805	C	G	0.55604	0.991007	38.1232	6.6e-10	0.235837	0.0366381	41.4342	1.2e-10	40.6549	1.8e-10
	rs11667321	rs838133	19	49250538	0.774803	A	G	0.556506	0.991592	38.1246	6.6e-10	0.235561	0.0366367	41.3404	1.3e-10	40.5309	1.9e-10
	rs12981072	rs838133	19	49241006	0.774753	C	G	0.564965	0.987466	37.84	7.7e-10	0.233394	0.0368002	40.2236	2.3e-10	39.9549	2.6e-10
	rs739320	rs838133	19	49261368	0.775125	T	C	0.394337	0.955683	36.8416	1.3e-09	0.238113	0.0379537	39.3603	3.5e-10	40.2092	2.3e-10
	rs11638576	rs2472297	15	75260387	1.0035	G	A	0.573409	0.989639	22.1811	2.5e-06	0.223595	0.0368342	36.8485	1.3e-09	36.8914	1.2e-09
	rs1800437	rs34783010	19	46181392	0.718746	G	C	0.805573	1	23.4229	1.3e-06	-0.275402	0.0458189	36.128	1.8e-09	35.9419	2e-09
	rs2238691	rs34783010	19	46179043	0.718738	G	A	0.805577	0.998633	23.4905	1.3e-06	-0.275276	0.0458496	36.0467	1.9e-09	35.8699	2.1e-09
	rs11672660	rs34783010	19	46180184	0.718742	C	T	0.805595	0.99966	23.1179	1.5e-06	-0.274036	0.04583	35.7534	2.2e-09	35.5269	2.5e-09
	rs34783010	rs34783010	19	46180414	0.718743	G	T	0.805602	1	23.0294	1.6e-06	-0.274303	0.0458427	35.8032	2.2e-09	35.5507	2.5e-09
	rs471211	rs2761589	11	31225707	0.484321	G	A	0.384862	0.999182	41.8985	9.6e-11	-0.222334	0.0372215	35.6798	2.3e-09	35.5677	2.5e-09
	rs158141	rs2761589	11	31212468	0.484315	C	G	0.384869	0.999745	41.7735	1e-10	-0.222083	0.0372126	35.6164	2.4e-09	35.5143	2.5e-09
	rs158145	rs2761589	11	31211625	0.484313	G	A	0.384868	0.999899	41.7464	1e-10	-0.222012	0.0372106	35.5973	2.4e-09	35.4897	2.6e-09
	rs208112	rs2761589	11	31198934	0.48431	T	G	0.384707	0.999369	41.8885	9.7e-11	-0.222072	0.0372183	35.602	2.4e-09	35.504	2.5e-09
	rs158137	rs2761589	11	31217988	0.484315	T	A	0.384863	0.999675	41.7619	1e-10	-0.221903	0.0372142	35.5555	2.5e-09	35.4598	2.6e-09
	rs158142	rs2761589	11	31212293	0.484314	G	A	0.38487	0.999785	41.7242	1.1e-10	-0.221943	0.0372122	35.5725	2.5e-09	35.4643	2.6e-09
	rs208099	rs2761589	11	31177296	0.48431	G	C	0.384755	0.999109	41.8182	1e-10	-0.221855	0.0372217	35.526	2.5e-09	35.4432	2.6e-09
	rs158147	rs2761589	11	31209773	0.484313	A	C	0.384913	0.999734	41.532	1.2e-10	-0.221365	0.0372127	35.3863	2.7e-09	35.2763	2.9e-09
	rs169625	rs2761589	11	31135108	0.484308	T	G	0.385334	0.999113	41.2908	1.3e-10	-0.220677	0.0372128	35.1667	3e-09	35.019	3.3e-09
	rs208074	rs2761589	11	31140075	0.484308	C	G	0.385308	0.999129	41.3099	1.3e-10	-0.22078	0.0372131	35.1987	3e-09	35.0653	3.2e-09
	rs208076	rs2761589	11	31136776	0.484308	A	G	0.385334	0.999126	41.3004	1.3e-10	-0.220695	0.0372126	35.1726	3e-09	35.0239	3.3e-09
	rs208073	rs2761589	11	31140754	0.484308	T	G	0.385308	0.999118	41.259	1.3e-10	-0.220625	0.0372132	35.1493	3.1e-09	35.0181	3.3e-09
	rs208100	rs2761589	11	31171084	0.48431	T	C	0.385164	0.999197	41.1768	1.4e-10	-0.220392	0.0372148	35.0719	3.2e-09	34.9895	3.3e-09
	rs176374	rs2761589	11	31178560	0.48431	G	C	0.385089	0.999433	41.3035	1.3e-10	-0.220062	0.0372124	34.9714	3.3e-09	34.8825	3.5e-09
	rs208077	rs2761589	11	31136441	0.484308	A	C	0.385391	0.999122	41.1474	1.4e-10	-0.220192	0.0372127	35.0122	3.3e-09	34.8631	3.5e-09
	rs208095	rs2761589	11	31179141	0.48431	T	C	0.38509	0.999433	41.3129	1.3e-10	-0.220102	0.0372124	34.9842	3.3e-09	34.8954	3.5e-09
	rs158149	rs2761589	11	31208954	0.484313	A	G	0.385098	0.999869	41.1028	1.4e-10	-0.219866	0.0372074	34.9187	3.4e-09	34.8261	3.6e-09
	rs208084	rs2761589	11	31196772	0.48431	T	C	0.385036	0.99957	41.147	1.4e-10	-0.219984	0.0372112	34.9489	3.4e-09	34.8541	3.6e-09
	rs208086	rs2761589	11	31194624	0.48431	T	A	0.385032	0.999478	41.1606	1.4e-10	-0.220015	0.0372108	34.9597	3.4e-09	34.8701	3.5e-09
	rs208113	rs2761589	11	31198788	0.48431	T	C	0.385028	0.999608	41.1611	1.4e-10	-0.22	0.0372106	34.955	3.4e-09	34.863	3.5e-09
	rs208070	rs2761589	11	31146557	0.484308	A	G	0.385257	0.999175	41.0121	1.5e-10	-0.219782	0.0372148	34.8781	3.5e-09	34.7902	3.7e-09
	rs208104	rs2761589	11	31167203	0.48431	G	A	0.385106	0.999281	41.0758	1.5e-10	-0.219802	0.0372143	34.8855	3.5e-09	34.7956	3.7e-09
	rs208101	rs2761589	11	31170443	0.48431	G	T	0.385079	0.999377	41.0284	1.5e-10	-0.21963	0.0372127	34.8338	3.6e-09	34.7432	3.8e-09
	rs208064	rs2761589	11	31158395	0.484309	G	A	0.385057	0.999169	40.8253	1.7e-10	-0.219401	0.0372154	34.756	3.7e-09	34.6892	3.9e-09
	rs208065	rs2761589	11	31157375	0.484308	G	A	0.38509	0.999058	40.8046	1.7e-10	-0.219461	0.0372162	34.7737	3.7e-09	34.7054	3.8e-09
	rs208082	rs2761589	11	31197885	0.48431	A	G	0.385044	0.999399	40.9965	1.5e-10	-0.219476	0.037215	34.7806	3.7e-09	34.6893	3.9e-09
	rs208085	rs2761589	11	31195157	0.48431	T	C	0.385094	0.999568	41.0022	1.5e-10	-0.219453	0.037211	34.781	3.7e-09	34.7013	3.8e-09
	rs208087	rs2761589	11	31193935	0.48431	T	G	0.385097	0.999571	40.9999	1.5e-10	-0.219432	0.0372108	34.7744	3.7e-09	34.6983	3.8e-09
	rs208092	rs2761589	11	31189274	0.48431	A	T	0.385126	0.999307	40.9765	1.5e-10	-0.219451	0.0372122	34.778	3.7e-09	34.6984	3.8e-09
	rs208107	rs2761589	11	31164999	0.48431	G	A	0.38506	0.999287	40.8663	1.6e-10	-0.219495	0.0372145	34.7876	3.7e-09	34.7159	3.8e-09
	rs381149	rs2761589	11	31190631	0.48431	G	A	0.385098	0.999557	40.9755	1.5e-10	-0.219404	0.0372113	34.7646	3.7e-09	34.6774	3.9e-09
	rs208106	rs2761589	11	31165852	0.48431	T	A	0.385144	0.999313	40.8815	1.6e-10	-0.219246	0.0372138	34.7099	3.8e-09	34.6214	4e-09
	rs400964	rs2761589	11	31177260	0.48431	T	A	0.38512	0.999364	40.9374	1.6e-10	-0.219343	0.0372133	34.7419	3.8e-09	34.661	3.9e-09
	rs10423928	rs34783010	19	46182304	0.718748	T	A	0.805508	1	22.3447	2.3e-06	-0.26989	0.04582	34.6947	3.9e-09	34.6398	4e-09
	rs208102	rs2761589	11	31167539	0.48431	C	T	0.38513	0.99933	40.8564	1.6e-10	-0.21912	0.0372135	34.6706	3.9e-09	34.5792	4.1e-09
	rs208109	rs2761589	11	31162595	0.48431	T	C	0.385017	0.999289	40.7646	1.7e-10	-0.219182	0.0372146	34.6882	3.9e-09	34.6172	4e-09
	rs208068	rs2761589	11	31151944	0.484308	C	T	0.385208	0.999133	40.6638	1.8e-10	-0.219021	0.0372157	34.6354	4e-09	34.5649	4.1e-09
	rs2554044	rs2761589	11	31161235	0.48431	T	A	0.385113	0.999253	40.6978	1.8e-10	-0.218968	0.0372148	34.6202	4e-09	34.5495	4.2e-09
	rs9374896	rs9387963	6	98310484	1.06181	C	T	0.533577	0.992628	42.388	7.5e-11	0.21255	0.0364332	34.035	5.4e-09	33.6971	6.4e-09
	rs1338549	rs9387963	6	98312143	1.06181	T	G	0.466616	0.993428	42.703	6.4e-11	-0.212353	0.0364129	34.0098	5.5e-09	33.6695	6.5e-09
	rs9374897	rs9387963	6	98310571	1.06181	G	A	0.533608	0.992797	42.3261	7.7e-11	0.212263	0.0364308	33.9477	5.7e-09	33.5914	6.8e-09
	rs1933721	rs9387963	6	98313223	1.06182	C	G	0.533615	0.994682	42.1843	8.3e-11	0.211157	0.0363983	33.6549	6.6e-09	33.3477	7.7e-09
	rs6565174	rs4788415	16	30111904	0.553288	A	C	0.115892	1	27.868	1.3e-07	-0.328427	0.0566153	33.6519	6.6e-09	35.3515	2.8e-09
	rs12975781	rs838133	19	49249698	0.774794	C	T	0.610457	0.989422	30.4051	3.5e-08	0.216675	0.0373889	33.5839	6.8e-09	33.3646	7.6e-09
	rs9320747	rs9387963	6	98310291	1.06181	T	G	0.533485	0.992756	41.914	9.5e-11	0.210726	0.0364287	33.4618	7.3e-09	33.124	8.6e-09
	rs1970028	rs2761589	11	31295440	0.484364	A	G	0.390827	0.997578	39.6923	3e-10	-0.21447	0.03714	33.3466	7.7e-09	33.527	7e-09
	rs10767892	rs2761589	11	31306248	0.484397	C	T	0.390822	0.996069	39.6051	3.1e-10	-0.21431	0.0371667	33.2489	8.1e-09	33.4411	7.3e-09
	rs2761588	rs2761589	11	31313761	0.484397	A	G	0.611427	0.995532	38.6889	5e-10	0.214359	0.0372055	33.1946	8.3e-09	33.3019	7.9e-09
	rs1929024	rs2761589	11	31304847	0.484397	C	T	0.391079	0.995648	39.4485	3.4e-10	-0.213952	0.0371616	33.147	8.5e-09	33.3494	7.7e-09
	rs2039722	rs9387963	6	98314912	1.06182	A	G	0.533669	0.996756	42.2559	8e-11	0.209168	0.0363659	33.0828	8.8e-09	32.9924	9.3e-09
	rs1330717	rs2761589	11	31309813	0.484397	A	C	0.390967	0.996336	39.1733	3.9e-10	-0.21329	0.0371619	32.9418	9.5e-09	33.1279	8.6e-09
	rs12189679	rs9387963	6	98333409	1.06183	G	A	0.534898	0.998463	41.2506	1.3e-10	0.207526	0.0363404	32.6112	1.1e-08	32.4692	1.2e-08
	rs1475559	rs2761589	11	31263566	0.484363	C	G	0.390352	0.997717	38.7848	4.7e-10	-0.212384	0.0371487	32.6854	1.1e-08	32.8614	9.9e-09
	rs2081194	rs838133	19	49263477	0.775226	G	C	0.399186	0.9486	28.7063	8.4e-08	0.217063	0.0379792	32.6648	1.1e-08	33.4067	7.5e-09
	rs7116699	rs2761589	11	31283377	0.484364	T	C	0.390492	0.997919	38.6611	5e-10	-0.212021	0.0371442	32.5821	1.1e-08	32.7906	1e-08
	rs1929023	rs2761589	11	31253853	0.484363	T	G	0.390531	0.998039	38.3753	5.8e-10	-0.211098	0.0371408	32.3047	1.3e-08	32.4657	1.2e-08
	rs12662607	rs9387963	6	98329264	1.06183	G	C	0.534359	0.999823	41.1943	1.4e-10	0.206133	0.0363233	32.2051	1.4e-08	32.1414	1.4e-08
	rs61373376	rs34783010	19	46183586	0.718752	C	T	0.845939	0.997683	22.2005	2.5e-06	-0.284729	0.0502599	32.0936	1.5e-08	31.9823	1.6e-08
	rs7744474	rs9387963	6	98330626	1.06183	C	T	0.534294	0.999676	40.9949	1.5e-10	0.205445	0.0363208	31.995	1.5e-08	31.9454	1.6e-08
	rs9372620	rs9387963	6	98330025	1.06183	G	A	0.534324	0.999891	41.0566	1.5e-10	0.205544	0.0363213	32.0249	1.5e-08	31.9763	1.6e-08
	rs9401305	rs9387963	6	98331937	1.06183	A	C	0.534307	1	40.8305	1.7e-10	0.205482	0.0363247	31.9995	1.5e-08	31.914	1.6e-08
	rs12662596	rs9387963	6	98329165	1.06183	G	A	0.534183	0.999852	40.9098	1.6e-10	0.205315	0.0363199	31.956	1.6e-08	31.8919	1.6e-08
	rs7756023	rs9387963	6	98330225	1.06183	G	A	0.534315	0.99991	40.8664	1.6e-10	0.205136	0.0363212	31.8979	1.6e-08	31.8391	1.7e-08
	rs7775492	rs9387963	6	98332930	1.06183	A	G	0.534372	0.999622	40.8462	1.6e-10	0.205153	0.0363258	31.8952	1.6e-08	31.8314	1.7e-08
	rs9320759	rs9387963	6	98331357	1.06183	A	G	0.534307	0.999926	40.8939	1.6e-10	0.205246	0.0363209	31.9328	1.6e-08	31.8716	1.6e-08
	rs9387845	rs9387963	6	98328963	1.06183	C	A	0.534187	0.999839	40.852	1.6e-10	0.205135	0.0363201	31.8996	1.6e-08	31.8377	1.7e-08
	rs9401250	rs9387963	6	98316447	1.06182	C	T	0.534265	0.997392	40.8243	1.7e-10	0.205515	0.0363612	31.9456	1.6e-08	31.8117	1.7e-08
	rs9490000	rs9387963	6	98331085	1.06183	C	G	0.53431	0.999904	40.9007	1.6e-10	0.205244	0.0363211	31.9319	1.6e-08	31.8682	1.6e-08
	rs9490001	rs9387963	6	98331133	1.06183	T	C	0.534313	0.999922	40.853	1.6e-10	0.205097	0.0363209	31.8865	1.6e-08	31.8272	1.7e-08
	rs9490003	rs9387963	6	98331316	1.06183	A	G	0.534305	0.999936	40.8979	1.6e-10	0.20526	0.0363207	31.9376	1.6e-08	31.8762	1.6e-08
	rs10484867	rs9387963	6	98332567	1.06183	G	A	0.534366	0.999768	40.832	1.7e-10	0.20503	0.0363239	31.8602	1.7e-08	31.8021	1.7e-08
	rs10484868	rs9387963	6	98332622	1.06183	C	T	0.534366	0.999763	40.8363	1.7e-10	0.20504	0.0363239	31.8634	1.7e-08	31.8052	1.7e-08
	rs2039719	rs9387963	6	98326863	1.06183	G	A	0.534191	0.999812	40.7866	1.7e-10	0.204899	0.0363202	31.8261	1.7e-08	31.7641	1.7e-08
	rs4839927	rs9387963	6	98325884	1.06183	G	A	0.534206	0.999752	40.6539	1.8e-10	0.204691	0.0363212	31.7598	1.7e-08	31.7035	1.8e-08
	rs4839928	rs9387963	6	98326012	1.06183	A	G	0.534205	0.999753	40.6544	1.8e-10	0.204693	0.0363212	31.7605	1.7e-08	31.7042	1.8e-08
	rs4839929	rs9387963	6	98326080	1.06183	G	C	0.534119	0.99946	40.6838	1.8e-10	0.204833	0.0363266	31.7944	1.7e-08	31.7364	1.8e-08
	rs9489980	rs9387963	6	98325541	1.06183	A	G	0.534205	0.999753	40.6544	1.8e-10	0.204693	0.0363212	31.7605	1.7e-08	31.7042	1.8e-08
	rs12205774	rs9387963	6	98324132	1.06183	C	T	0.534191	0.999716	40.6176	1.9e-10	0.204547	0.0363215	31.7146	1.8e-08	31.6627	1.8e-08
	rs4142530	rs9387963	6	98322282	1.06183	T	C	0.534217	0.999682	40.5427	1.9e-10	0.204357	0.0363227	31.6537	1.8e-08	31.5883	1.9e-08
	rs9387823	rs9387963	6	98325000	1.06183	C	A	0.5342	0.999751	40.6477	1.8e-10	0.204654	0.0363211	31.7484	1.8e-08	31.6949	1.8e-08
	rs9401278	rs9387963	6	98324943	1.06183	C	A	0.534198	0.999742	40.6473	1.8e-10	0.204668	0.0363211	31.7528	1.8e-08	31.6983	1.8e-08
	rs12148513	rs2472297	15	75222225	1.00344	C	T	0.621188	0.980049	18.3248	1.9e-05	0.211901	0.0377347	31.5344	2e-08	31.5296	2e-08
	rs6906737	rs9387963	6	98345853	1.06216	T	A	0.530721	0.987073	39.0574	4.1e-10	0.204603	0.0365284	31.3734	2.1e-08	31.519	2e-08
	rs4580876	rs9387963	6	98322872	1.06183	G	A	0.52367	0.998185	40.2656	2.2e-10	0.19892	0.0363014	30.027	4.3e-08	29.9862	4.4e-08
DBP	SNP*	Locus	CHR	BP	GENPOS	ALLELE1	ALLELE0	A1FREQ	INFO	CHISQ_LINREG	P_LINREG	BETA	SE	CHISQ_BOLT_LMM_INF	P_BOLT_LMM_INF	CHISQ_BOLT_LMM	P_BOLT_LMM
	rs35556055	rs2472297	15	75253414	1.00349	G	A	0.482428	0.999251	125.695	3.6e-29	0.242414	0.0204199	140.931	1.7e-32	142.766	6.6e-33
	rs34307821	rs2472297	15	75256826	1.0035	C	T	0.482464	0.999558	125.183	4.6e-29	0.242027	0.0204166	140.528	2e-32	142.508	7.5e-33
	rs34799293	rs2472297	15	75258773	1.0035	T	C	0.482493	0.999658	125.107	4.8e-29	0.241961	0.0204152	140.471	2.1e-32	142.432	7.8e-33
	rs35882241	rs2472297	15	75260773	1.0035	T	C	0.482484	0.99985	125.012	5.1e-29	0.241814	0.0204134	140.323	2.3e-32	142.302	8.4e-33
	rs4886413	rs2472297	15	75262310	1.0035	G	C	0.482475	0.999961	124.938	5.3e-29	0.241703	0.0204123	140.209	2.4e-32	142.204	8.8e-33
	rs62029217	rs2472297	15	75261899	1.0035	C	T	0.48265	1	123.968	8.6e-29	0.240906	0.0204198	139.184	4e-32	141.174	1.5e-32
	rs35103257	rs2472297	15	75277412	1.00362	G	T	0.483556	0.990173	117.021	2.8e-27	0.235969	0.0205066	132.41	1.2e-30	134.176	5e-31
	rs35116156	rs2472297	15	75292074	1.00366	C	T	0.500657	0.999267	103.232	3e-24	0.220449	0.0204046	116.724	3.3e-27	118.093	1.7e-27
	rs3812945	rs2472297	15	75289722	1.00366	T	C	0.517124	1	100.022	1.5e-23	0.216212	0.0204092	112.23	3.2e-26	113.872	1.4e-26
	rs12898551	rs2472297	15	75297907	1.00366	C	G	0.526172	0.998903	95.7499	1.3e-22	0.210354	0.0204462	105.847	8e-25	107.817	2.9e-25
	rs12900072	rs2472297	15	75307148	1.00367	G	A	0.526407	0.998646	95.8535	1.2e-22	0.210059	0.0204503	105.508	9.5e-25	107.414	3.6e-25
	rs113362184	rs2472297	15	75349999	1.00371	T	C	0.530283	0.995648	95.6827	1.3e-22	0.20993	0.0204943	104.926	1.3e-24	106.494	5.7e-25
	rs4886648	rs2472297	15	75308837	1.00367	G	A	0.526139	0.998335	94.0294	3.1e-22	0.208929	0.0204533	104.344	1.7e-24	106.075	7.1e-25
	rs7181261	rs2472297	15	75355583	1.00372	G	T	0.530833	0.995842	95.2244	1.7e-22	0.209208	0.020493	104.219	1.8e-24	105.804	8.1e-25
	rs2304902	rs2472297	15	75340727	1.00368	G	T	0.530559	0.994983	94.5697	2.4e-22	0.209173	0.0205026	104.086	1.9e-24	105.708	8.5e-25
	rs4886417	rs2472297	15	75330159	1.00368	T	G	0.529845	0.996597	92.5023	6.7e-22	0.207684	0.0204837	102.8	3.7e-24	104.419	1.6e-24
	rs10457481	rs10457480	6	126813721	1.32699	G	A	0.697813	0.995327	70.699	4.2e-17	0.210372	0.0222113	89.7075	2.8e-21	89.0622	3.8e-21
	rs10457480	rs10457480	6	126812609	1.32699	C	G	0.697786	0.995334	70.2716	5.2e-17	0.209984	0.0222105	89.3835	3.3e-21	88.7301	4.5e-21
	rs10457478	rs10457480	6	126704934	1.32693	C	G	0.687105	0.999373	69.3946	8.1e-17	0.206511	0.0219563	88.4638	5.2e-21	87.286	9.4e-21
	rs34539692	rs10457480	6	126747110	1.32695	A	C	0.686889	0.996722	67.9107	1.7e-16	0.205746	0.0219793	87.627	7.9e-21	86.5568	1.4e-20
	rs12202204	rs10457480	6	126686407	1.32693	A	G	0.686245	1	67.689	1.9e-16	0.205042	0.0219427	87.3189	9.2e-21	86.1342	1.7e-20
	rs11638576	rs2472297	15	75260387	1.0035	G	A	0.57341	0.989639	72.8986	1.4e-17	0.190641	0.0207143	84.7016	3.5e-20	84.6271	3.6e-20
	rs12148513	rs2472297	15	75222225	1.00344	C	T	0.621189	0.980049	69.8934	6.3e-17	0.191679	0.0212207	81.5885	1.7e-19	82.3937	1.1e-19
	rs7910951	rs7924036	10	65338304	0.8715	A	G	0.526607	0.997655	69.7011	6.9e-17	-0.168806	0.0204295	68.2745	1.4e-16	68.685	1.2e-16
	rs7911761	rs7924036	10	65338753	0.8715	C	G	0.526568	0.997699	69.6688	7e-17	-0.16875	0.020429	68.233	1.5e-16	68.6563	1.2e-16
	rs6479908	rs7924036	10	65333648	0.871493	C	G	0.526335	0.998822	69.3618	8.2e-17	-0.168374	0.0204171	68.0085	1.6e-16	68.2198	1.5e-16
	rs7090758	rs7924036	10	65335315	0.871498	T	C	0.525826	0.99902	69.762	6.7e-17	-0.168401	0.0204149	68.0447	1.6e-16	68.3177	1.4e-16
	rs7077256	rs7924036	10	65336185	0.8715	A	G	0.526289	0.999284	69.2904	8.5e-17	-0.168164	0.0204123	67.8708	1.7e-16	68.0842	1.6e-16
	rs7902616	rs7924036	10	65336373	0.8715	G	A	0.526325	0.999151	69.3355	8.3e-17	-0.168233	0.0204137	67.917	1.7e-16	68.1309	1.5e-16
	rs10822183	rs7924036	10	65337141	0.8715	T	C	0.526289	0.999302	69.2734	8.6e-17	-0.168136	0.0204122	67.849	1.8e-16	68.0642	1.6e-16
	rs12768534	rs7924036	10	65340897	0.871501	G	A	0.526363	0.998944	68.7455	1.1e-16	-0.167542	0.0204155	67.348	2.3e-16	67.5395	2.1e-16
	rs12245149	rs7924036	10	65321147	0.871454	C	A	0.513717	0.998881	65.0469	7.3e-16	-0.164759	0.0204017	65.218	6.7e-16	65.3333	6.3e-16
	rs2163188	rs7924036	10	65314711	0.871438	G	C	0.513745	0.99934	65.0525	7.3e-16	-0.164499	0.0203975	65.0389	7.3e-16	65.1174	7.1e-16
	rs7898861	rs7924036	10	65319678	0.87144	T	C	0.513769	0.999137	64.9963	7.5e-16	-0.164538	0.0203993	65.0585	7.3e-16	65.1524	6.9e-16
	rs12247907	rs7924036	10	65317045	0.871438	G	C	0.514239	0.999375	64.6936	8.7e-16	-0.164469	0.0203961	65.0241	7.4e-16	65.0574	7.3e-16
	rs9919429	rs7924036	10	65313819	0.871438	A	G	0.513737	0.999315	65.027	7.4e-16	-0.164449	0.0203977	64.9977	7.5e-16	65.0738	7.2e-16
	rs6479905	rs7924036	10	65315231	0.871438	A	G	0.513747	0.999286	64.942	7.7e-16	-0.164379	0.020398	64.9402	7.7e-16	65.0112	7.4e-16
	rs7070761	rs7924036	10	65317056	0.871438	A	T	0.514248	0.999326	64.5602	9.4e-16	-0.164312	0.0203967	64.8966	7.9e-16	64.9228	7.8e-16
	rs7919685	rs7924036	10	65315800	0.871438	G	T	0.514235	0.999407	64.5964	9.2e-16	-0.16429	0.0203958	64.8843	7.9e-16	64.8947	7.9e-16
	rs2393984	rs7924036	10	65314971	0.871438	A	G	0.514235	0.999398	64.5955	9.2e-16	-0.164285	0.0203958	64.8809	8e-16	64.8932	7.9e-16
	rs10761785	rs7924036	10	65318766	0.871438	G	T	0.487811	0.996172	63.5936	1.5e-15	0.16372	0.0204281	64.2311	1.1e-15	64.2925	1.1e-15
	rs3847326	rs7924036	10	65331859	0.871486	A	G	0.520949	0.998078	63.9581	1.3e-15	-0.163286	0.0204145	63.9767	1.3e-15	64.0896	1.2e-15
	rs4746204	rs7924036	10	65328518	0.871473	C	T	0.521052	0.998725	63.9666	1.3e-15	-0.163202	0.0204115	63.9295	1.3e-15	64.052	1.2e-15
	rs4746205	rs7924036	10	65329518	0.871477	A	G	0.521119	0.998549	63.961	1.3e-15	-0.16318	0.0204129	63.9034	1.3e-15	64.0135	1.2e-15
	rs12245367	rs7924036	10	65321464	0.871458	C	T	0.521113	0.998875	64.2071	1.1e-15	-0.162968	0.0204107	63.7511	1.4e-15	63.9091	1.3e-15
	rs3847325	rs7924036	10	65331511	0.871484	G	C	0.521149	0.998214	63.93	1.3e-15	-0.163062	0.0204153	63.7955	1.4e-15	63.9191	1.3e-15
	rs7100409	rs7924036	10	65330195	0.871479	T	A	0.52111	0.998458	63.8894	1.3e-15	-0.163055	0.0204135	63.8022	1.4e-15	63.9244	1.3e-15
	rs7100413	rs7924036	10	65330208	0.871479	T	C	0.52111	0.998458	63.9139	1.3e-15	-0.163081	0.0204135	63.8225	1.4e-15	63.9408	1.3e-15
	rs7907451	rs7924036	10	65328740	0.871474	T	A	0.521076	0.998682	63.8567	1.3e-15	-0.162979	0.0204116	63.7537	1.4e-15	63.8844	1.3e-15
	rs4746203	rs7924036	10	65323997	0.871461	G	T	0.521103	0.999203	63.7179	1.4e-15	-0.162874	0.020408	63.6951	1.5e-15	63.8493	1.3e-15
	rs10822181	rs7924036	10	65325126	0.871461	G	A	0.521598	0.999239	63.3092	1.8e-15	-0.162701	0.0204072	63.5643	1.6e-15	63.6647	1.5e-15
	rs7899657	rs7924036	10	65323265	0.871461	G	A	0.521736	0.998795	63.0804	2e-15	-0.162464	0.0204119	63.3501	1.7e-15	63.4397	1.7e-15
	rs7924036	rs7924036	10	65191645	0.871343	G	T	0.496485	0.999646	58.4852	2e-14	0.155996	0.020383	58.5719	2e-14	58.2676	2.3e-14
	rs7916868	rs7924036	10	64988931	0.871111	A	T	0.496242	0.998098	58.2846	2.3e-14	0.155791	0.0203942	58.3541	2.2e-14	57.9193	2.7e-14
	rs12910558	rs2472297	15	75396809	1.00384	C	T	0.618216	0.986044	48.165	3.9e-12	0.159314	0.0211301	56.8464	4.7e-14	56.6951	5.1e-14
	rs10822184	rs7924036	10	65337153	0.8715	T	C	0.506805	1	58.4064	2.1e-14	0.152054	0.0203797	55.6673	8.6e-14	56.5939	5.4e-14
	rs10761786	rs7924036	10	65336207	0.8715	T	C	0.506756	0.999904	58.1793	2.4e-14	0.151744	0.0203803	55.4373	9.6e-14	56.3873	6e-14
	rs4886649	rs2472297	15	75328595	1.00368	T	C	0.636258	0.972008	46.3208	1e-11	0.158296	0.021482	54.2987	1.7e-13	54.2979	1.7e-13
	rs10761787	rs7924036	10	65353755	0.871525	A	T	0.506882	0.993989	56.5712	5.4e-14	0.150146	0.0204317	54.0029	2e-13	54.9331	1.2e-13
	rs7895549	rs7924036	10	65357438	0.871533	G	A	0.506717	0.992787	56.079	7e-14	0.149701	0.0204413	53.633	2.4e-13	54.5853	1.5e-13
	rs10822186	rs7924036	10	65350383	0.871517	A	G	0.506846	0.995604	56.0393	7.1e-14	0.149376	0.0204186	53.519	2.6e-13	54.4675	1.6e-13
	rs516246	rs838133	19	49206172	0.774556	C	T	0.49191	1	37.3121	1e-09	-0.149129	0.020402	53.4293	2.7e-13	52.2254	4.9e-13
	rs516316	rs838133	19	49206145	0.774556	G	C	0.491907	0.999916	37.1539	1.1e-09	-0.148961	0.0204024	53.3065	2.9e-13	52.0828	5.3e-13
	rs679574	rs838133	19	49206108	0.774555	C	G	0.491912	0.999784	37.0816	1.1e-09	-0.148831	0.0204036	53.2078	3e-13	51.9848	5.6e-13
	rs681343	rs838133	19	49206462	0.774557	C	T	0.491915	1	36.971	1.2e-09	-0.148751	0.0204	53.1691	3.1e-13	51.9558	5.7e-13
	rs492602	rs838133	19	49206417	0.774557	A	G	0.491985	1	36.867	1.3e-09	-0.148355	0.0204024	52.8737	3.6e-13	51.7699	6.2e-13
	rs601338	rs838133	19	49206674	0.77456	G	A	0.491936	1	36.5264	1.5e-09	-0.14814	0.0204038	52.7134	3.9e-13	51.5471	7e-13
	rs7897379	rs7924036	10	65301725	0.871427	T	C	0.521407	0.998959	54.5378	1.5e-13	0.148069	0.0204092	52.6349	4e-13	53.4802	2.6e-13
	rs2393986	rs7924036	10	65320006	0.87144	A	T	0.521106	0.999417	54.361	1.7e-13	0.147702	0.0204059	52.3914	4.5e-13	53.2653	2.9e-13
	rs10761784	rs7924036	10	65308750	0.871438	A	T	0.520517	0.999148	53.8288	2.2e-13	0.147307	0.0204067	52.1074	5.3e-13	52.9012	3.5e-13
	rs7085018	rs7924036	10	65286667	0.871407	T	C	0.522205	0.998647	53.9714	2e-13	0.147111	0.0204122	51.9411	5.7e-13	52.8481	3.6e-13
	rs10761782	rs7924036	10	65287064	0.871407	A	G	0.522319	0.998293	53.5183	2.6e-13	0.146988	0.0204168	51.8311	6e-13	52.7709	3.7e-13
	rs10740134	rs7924036	10	65315433	0.871438	T	C	0.520359	1	53.5791	2.5e-13	0.146871	0.0204048	51.8093	6.1e-13	52.6143	4.1e-13
	rs7920036	rs7924036	10	65293860	0.871407	T	C	0.52169	0.998564	53.5445	2.5e-13	0.146886	0.0204111	51.7873	6.2e-13	52.653	4e-13
	rs479486	rs838133	19	49229323	0.774736	G	A	0.446723	0.998912	37.6519	8.5e-10	-0.147719	0.0205315	51.7643	6.3e-13	51.726	6.4e-13
	rs7920058	rs7924036	10	65293924	0.871409	T	G	0.521683	0.998443	53.4486	2.7e-13	0.146748	0.0204111	51.6901	6.5e-13	52.5631	4.2e-13
	rs10733793	rs7924036	10	65323809	0.871461	T	G	0.51327	1	52.7695	3.8e-13	0.146604	0.0204108	51.5907	6.8e-13	52.462	4.4e-13
	rs4633333	rs7924036	10	65328539	0.871473	C	G	0.513661	0.999335	53.3155	2.8e-13	0.146247	0.020396	51.4144	7.5e-13	52.2905	4.8e-13
	rs10822182	rs7924036	10	65325478	0.871461	G	A	0.513634	0.999823	53.14	3.1e-13	0.146073	0.0203925	51.31	7.9e-13	52.2142	5e-13
	rs10740136	rs7924036	10	65329622	0.871477	A	C	0.513635	0.99916	53.1086	3.2e-13	0.145998	0.0203974	51.2322	8.2e-13	52.103	5.3e-13
	rs2287921	rs838133	19	49228272	0.774735	T	C	0.463242	1	35.5067	2.5e-09	-0.14538	0.0204677	50.4511	1.2e-12	49.8652	1.6e-12
	rs569970	rs838133	19	49207718	0.774571	T	C	0.465833	0.99963	33.2106	8.3e-09	-0.145485	0.0204658	50.533	1.2e-12	49.6704	1.8e-12
	rs570794	rs838133	19	49207651	0.77457	T	C	0.46583	0.999645	33.2096	8.3e-09	-0.14547	0.0204657	50.5232	1.2e-12	49.6663	1.8e-12
	rs571689	rs838133	19	49207554	0.774569	C	T	0.465828	0.999669	33.1864	8.4e-09	-0.145438	0.0204655	50.5028	1.2e-12	49.6523	1.8e-12
	rs8112983	rs838133	19	49229525	0.774737	T	C	0.463149	0.999391	35.689	2.3e-09	-0.145379	0.0204707	50.4352	1.2e-12	49.8859	1.6e-12
	rs11878908	rs838133	19	49227443	0.774734	C	T	0.463169	0.999136	35.3736	2.7e-09	-0.14532	0.0204753	50.3718	1.3e-12	49.7849	1.7e-12
	rs2150213	rs2761589	11	31244634	0.484356	A	G	0.629009	0.998589	50.7799	1e-12	-0.149802	0.0211024	50.3933	1.3e-12	52.5437	4.2e-13
	rs11031320	rs2761589	11	31242545	0.484356	C	T	0.630516	0.9985	50.3335	1.3e-12	-0.149642	0.0211205	50.1991	1.4e-12	52.445	4.4e-13
	rs11031323	rs2761589	11	31245413	0.484356	T	G	0.628992	0.998467	50.6083	1.1e-12	-0.149487	0.0211035	50.1761	1.4e-12	52.3249	4.7e-13
	rs506897	rs838133	19	49208629	0.77458	G	C	0.465956	0.999864	32.973	9.3e-09	-0.144909	0.0204634	50.146	1.4e-12	49.2828	2.2e-12
	rs2065208	rs2761589	11	31239457	0.484356	C	T	0.630715	0.997172	50.31	1.3e-12	-0.149456	0.0211283	50.0373	1.5e-12	52.2435	4.9e-13
	rs503279	rs838133	19	49209010	0.774582	T	C	0.465954	1	32.8861	9.8e-09	-0.144784	0.020463	50.0614	1.5e-12	49.1905	2.3e-12
	rs439523	rs838133	19	49236102	0.774746	T	C	0.469759	0.997921	36.8512	1.3e-09	-0.144674	0.0204654	49.9734	1.6e-12	50.4529	1.2e-12
	rs12979891	rs838133	19	49227256	0.774733	C	T	0.463379	0.999004	34.9761	3.3e-09	-0.144566	0.0204761	49.8469	1.7e-12	49.3119	2.2e-12
	rs2251034	rs838133	19	49207792	0.774572	G	A	0.466456	0.999601	32.7298	1.1e-08	-0.144389	0.0204639	49.7839	1.7e-12	49.103	2.4e-12
	rs58702363	rs2761589	11	31246397	0.484356	C	A	0.629064	0.998681	50.3417	1.3e-12	-0.148884	0.0211022	49.7787	1.7e-12	51.9005	5.8e-13
	rs633372	rs838133	19	49209226	0.774583	G	A	0.466553	0.999606	32.6884	1.1e-08	-0.144345	0.0204643	49.7521	1.7e-12	48.9641	2.6e-12
	rs11666792	rs838133	19	49227043	0.774733	G	A	0.463383	0.998792	34.8611	3.5e-09	-0.144391	0.0204779	49.7177	1.8e-12	49.1819	2.3e-12
	rs2548459	rs838133	19	49209339	0.774584	T	C	0.466848	0.999045	32.7275	1.1e-08	-0.144195	0.0204693	49.6242	1.9e-12	48.8301	2.8e-12
	rs504963	rs838133	19	49208865	0.774581	G	A	0.466165	1	32.4516	1.2e-08	-0.144118	0.0204628	49.6029	1.9e-12	48.7659	2.9e-12
	rs507711	rs838133	19	49208564	0.774579	C	T	0.467127	0.996847	32.6203	1.1e-08	-0.144358	0.020491	49.6311	1.9e-12	48.7571	2.9e-12
	rs507855	rs838133	19	49208501	0.774579	A	G	0.4671	0.996936	32.6118	1.1e-08	-0.14425	0.02049	49.5622	1.9e-12	48.7454	2.9e-12
	rs10822143	rs7924036	10	64887856	0.871046	C	T	0.495735	0.997339	49.1277	2.4e-12	0.14356	0.0204038	49.5047	2e-12	50.184	1.4e-12
	rs441975	rs2761589	11	31233351	0.484345	C	T	0.630732	0.998395	49.2529	2.2e-12	-0.148412	0.0211245	49.3589	2.1e-12	51.6438	6.7e-13
	rs507766	rs838133	19	49208543	0.774579	T	C	0.467151	0.996846	32.4293	1.2e-08	-0.14393	0.0204907	49.3392	2.2e-12	48.4812	3.3e-12
	rs11031324	rs2761589	11	31250299	0.484363	T	C	0.629753	0.999061	49.7576	1.7e-12	-0.148024	0.0211053	49.1905	2.3e-12	51.2258	8.2e-13
	rs632111	rs838133	19	49208978	0.774582	A	G	0.466793	0.999741	32.1069	1.5e-08	-0.143257	0.0204617	49.0167	2.5e-12	48.2976	3.7e-12
	rs2287922	rs838133	19	49232226	0.77474	G	A	0.464243	1	34.3564	4.6e-09	-0.143239	0.0204732	48.9497	2.6e-12	48.6317	3.1e-12
	rs3999089	rs7924036	10	65203808	0.871343	A	G	0.527315	0.99906	49.7823	1.7e-12	0.142564	0.020412	48.7806	2.9e-12	49.286	2.2e-12
	rs1407259	rs2761589	11	31043939	0.484229	C	A	0.633725	0.996372	51.7403	6.3e-13	0.14776	0.0211745	48.6952	3e-12	48.5674	3.2e-12
	rs692854	rs838133	19	49209464	0.774584	C	A	0.467627	0.999076	31.6467	1.8e-08	-0.142794	0.0204657	48.6819	3e-12	47.7045	5e-12
	rs10740131	rs7924036	10	65271488	0.871355	A	T	0.526345	0.995731	50.5033	1.2e-12	0.142432	0.0204398	48.558	3.2e-12	48.8273	2.8e-12
	rs158139	rs2761589	11	31216076	0.484315	C	T	0.629788	0.999523	49.1733	2.3e-12	-0.147057	0.0211025	48.5626	3.2e-12	50.7564	1e-12
	rs286649	rs2761589	11	31230468	0.484338	C	T	0.629838	0.998728	49.0578	2.5e-12	-0.147093	0.0211101	48.5521	3.2e-12	50.7345	1.1e-12
	rs176373	rs2761589	11	31136026	0.484308	G	T	0.629998	0.998898	48.8688	2.7e-12	-0.147007	0.0211118	48.4872	3.3e-12	50.695	1.1e-12
	rs34136780	rs2761589	11	31069793	0.484229	T	C	0.63379	0.99722	51.4943	7.2e-13	0.147456	0.0211735	48.4995	3.3e-12	48.3571	3.6e-12
	rs2756191	rs2761589	11	31135882	0.484308	A	T	0.629985	0.998874	48.9023	2.7e-12	-0.146957	0.0211116	48.4548	3.4e-12	50.6524	1.1e-12
	rs286650	rs2761589	11	31230207	0.484337	T	C	0.629632	0.998271	48.8395	2.8e-12	-0.146911	0.0211116	48.4246	3.4e-12	50.5656	1.2e-12
	rs603985	rs838133	19	49207257	0.774566	T	C	0.465493	0.995591	30.8398	2.8e-08	-0.142645	0.0205114	48.3642	3.5e-12	47.7659	4.8e-12
	rs7940420	rs2761589	11	31366700	0.48448	T	A	0.359231	0.994163	48.6337	3.1e-12	0.148054	0.021288	48.369	3.5e-12	50.8069	1e-12
	rs158144	rs2761589	11	31211795	0.484313	A	C	0.629509	0.999742	48.7402	2.9e-12	-0.14668	0.0210977	48.3365	3.6e-12	50.4947	1.2e-12
	rs158146	rs2761589	11	31210433	0.484313	G	A	0.629523	0.999665	48.9044	2.7e-12	-0.146711	0.0210983	48.3541	3.6e-12	50.5707	1.1e-12
	rs208071	rs2761589	11	31144996	0.484308	C	T	0.629936	0.998874	48.8031	2.8e-12	-0.146753	0.0211106	48.3254	3.6e-12	50.5189	1.2e-12
	rs208110	rs2761589	11	31204271	0.484312	T	C	0.629993	0.999382	48.9684	2.6e-12	-0.146768	0.0211076	48.3489	3.6e-12	50.4718	1.2e-12
	rs158140	rs2761589	11	31212971	0.484315	T	C	0.629506	0.99964	48.7374	2.9e-12	-0.146564	0.0210984	48.2566	3.7e-12	50.4045	1.3e-12
	rs1704773	rs838133	19	49209566	0.774585	A	G	0.468201	0.998842	31.4352	2.1e-08	-0.142161	0.0204655	48.2517	3.7e-12	47.4106	5.8e-12
	rs413067	rs2761589	11	31223497	0.484317	T	C	0.629522	0.999511	48.7327	2.9e-12	-0.146573	0.0210997	48.2562	3.7e-12	50.4051	1.3e-12
	rs56334134	rs2761589	11	31040126	0.484198	A	G	0.633028	0.985411	51.8758	5.9e-13	0.147851	0.0212786	48.2792	3.7e-12	47.9307	4.4e-12
	rs602662	rs838133	19	49206985	0.774562	G	A	0.464683	1	31.2147	2.3e-08	-0.142152	0.0204642	48.2517	3.7e-12	47.5381	5.4e-12
	rs366758	rs2761589	11	31222499	0.484315	A	C	0.629511	0.999604	48.7173	3e-12	-0.14654	0.0210986	48.2394	3.8e-12	50.39	1.3e-12
	rs438578	rs2761589	11	31222579	0.484315	C	T	0.629512	0.999605	48.7328	2.9e-12	-0.146553	0.0210987	48.2477	3.8e-12	50.4002	1.3e-12
	rs646327	rs838133	19	49209851	0.774586	A	G	0.471646	0.997813	31.5119	2e-08	-0.142155	0.0204726	48.2146	3.8e-12	47.4198	5.7e-12
	rs158136	rs2761589	11	31220712	0.484315	C	T	0.629795	0.999676	48.7171	3e-12	-0.146436	0.0211011	48.1595	3.9e-12	50.3508	1.3e-12
	rs485186	rs838133	19	49207206	0.774565	A	G	0.463528	1	31.0768	2.5e-08	-0.14211	0.0204708	48.1929	3.9e-12	47.6206	5.2e-12
	rs61878209	rs2761589	11	31113275	0.484229	C	T	0.633078	0.997164	51.517	7.1e-13	0.146798	0.0211663	48.1003	4e-12	47.8659	4.6e-12
	rs485073	rs838133	19	49207255	0.774566	A	G	0.465433	0.995572	30.6916	3e-08	-0.142243	0.020511	48.0934	4.1e-12	47.5152	5.5e-12
	rs919045	rs2761589	11	31111810	0.484229	T	C	0.633099	0.997187	51.5107	7.1e-13	0.146795	0.0211663	48.0987	4.1e-12	47.8688	4.6e-12
	rs10995445	rs7924036	10	64874754	0.870984	A	T	0.527812	0.989459	44.9054	2.1e-11	0.142175	0.0205191	48.0099	4.2e-12	48.2067	3.8e-12
	rs1321958	rs2761589	11	31048683	0.484229	G	A	0.633075	0.997369	51.4035	7.5e-13	0.14664	0.0211643	48.0061	4.2e-12	47.7747	4.8e-12
	rs208088	rs2761589	11	31192686	0.48431	T	C	0.629531	0.99939	48.4027	3.5e-12	-0.146213	0.0211019	48.0097	4.2e-12	50.2	1.4e-12
	rs1407258	rs2761589	11	31059839	0.484229	T	A	0.633083	0.997368	51.3694	7.7e-13	0.146597	0.0211644	47.9774	4.3e-12	47.7437	4.9e-12
	rs169623	rs2761589	11	31184157	0.48431	T	C	0.629564	0.999276	48.3824	3.5e-12	-0.146205	0.0211034	47.9977	4.3e-12	50.1845	1.4e-12
	rs7112412	rs2761589	11	31370271	0.48448	T	C	0.359038	0.994395	48.1164	4e-12	0.147434	0.0212885	47.9632	4.3e-12	50.358	1.3e-12
	rs78986775	rs2761589	11	31055942	0.484229	C	T	0.633083	0.997368	51.3699	7.7e-13	0.146597	0.0211644	47.9774	4.3e-12	47.7437	4.9e-12
	rs10822164	rs7924036	10	65127258	0.871281	G	A	0.526361	0.999919	49.5907	1.9e-12	0.141304	0.020404	47.9596	4.4e-12	48.4251	3.4e-12
	rs208093	rs2761589	11	31184400	0.48431	T	C	0.629806	0.99921	48.4124	3.5e-12	-0.146163	0.0211065	47.9556	4.4e-12	50.173	1.4e-12
	rs10822168	rs7924036	10	65165184	0.871342	G	A	0.526622	0.999151	49.5724	1.9e-12	0.14126	0.020412	47.8926	4.5e-12	48.3932	3.5e-12
	rs1964699	rs2761589	11	31090390	0.484229	T	C	0.633946	0.996807	50.7824	1e-12	0.146539	0.0211779	47.878	4.5e-12	47.7798	4.8e-12
	rs208067	rs2761589	11	31153578	0.484308	C	T	0.629904	0.998922	48.3443	3.6e-12	-0.146109	0.0211101	47.9042	4.5e-12	50.1083	1.5e-12
	rs208072	rs2761589	11	31141288	0.484308	C	T	0.629887	0.998945	48.347	3.6e-12	-0.146115	0.0211097	47.9097	4.5e-12	50.1095	1.5e-12
	rs208090	rs2761589	11	31190992	0.48431	T	C	0.62982	0.999417	48.3675	3.5e-12	-0.14603	0.0211047	47.8769	4.5e-12	50.1072	1.5e-12
	rs208091	rs2761589	11	31190099	0.48431	G	C	0.629822	0.999435	48.3706	3.5e-12	-0.146043	0.0211044	47.8866	4.5e-12	50.1194	1.4e-12
	rs7902343	rs7924036	10	65005399	0.871112	C	T	0.52791	0.9977	48.5768	3.2e-12	0.141335	0.0204227	47.8929	4.5e-12	48.3425	3.6e-12
	rs208063	rs2761589	11	31159777	0.48431	C	T	0.629893	0.999151	48.2746	3.7e-12	-0.146019	0.0211077	47.8562	4.6e-12	50.0463	1.5e-12
	rs6484500	rs2761589	11	31355524	0.484479	A	C	0.359081	0.994468	48.0603	4.1e-12	0.147259	0.0212867	47.8571	4.6e-12	50.2528	1.4e-12
	rs7084569	rs7924036	10	64876554	0.870995	G	A	0.527918	0.991328	45.135	1.8e-11	0.141842	0.0205032	47.8595	4.6e-12	48.0471	4.2e-12
	rs7940020	rs2761589	11	31366453	0.48448	T	G	0.358808	0.994495	47.9481	4.4e-12	0.147254	0.0212917	47.8312	4.6e-12	50.1834	1.4e-12
	rs10509186	rs7924036	10	65207018	0.871343	C	T	0.52643	0.999825	49.4908	2e-12	0.141107	0.0204044	47.8245	4.7e-12	48.3149	3.6e-12
	rs17333520	rs2761589	11	31058834	0.484229	C	T	0.633913	0.997062	50.6082	1.1e-12	0.1464	0.0211752	47.8001	4.7e-12	47.6722	5e-12
	rs208083	rs2761589	11	31196880	0.48431	G	A	0.629818	0.999427	48.3369	3.6e-12	-0.145947	0.0211042	47.8247	4.7e-12	50.0419	1.5e-12
	rs972714	rs2761589	11	31358875	0.484479	T	G	0.35881	0.994484	47.9837	4.3e-12	0.147191	0.0212916	47.7907	4.7e-12	50.1478	1.4e-12
	rs10761766	rs7924036	10	65190327	0.871343	G	A	0.526433	0.999714	49.4873	2e-12	0.141043	0.0204056	47.7754	4.8e-12	48.2213	3.8e-12
	rs208103	rs2761589	11	31167400	0.48431	A	G	0.629839	0.999194	48.2382	3.8e-12	-0.145905	0.0211066	47.7862	4.8e-12	50.0088	1.5e-12
	rs61878206	rs2761589	11	31091953	0.484229	T	C	0.632794	0.996774	51.2185	8.3e-13	0.146277	0.0211656	47.7628	4.8e-12	47.401	5.8e-12
	rs672396	rs2761589	11	31386165	0.484496	A	G	0.358829	0.994444	48.0977	4.1e-12	0.14713	0.021291	47.7543	4.8e-12	50.2278	1.4e-12
	rs10761762	rs7924036	10	65184717	0.871343	T	C	0.526461	0.999795	49.4233	2.1e-12	0.140971	0.020405	47.7296	4.9e-12	48.2007	3.8e-12
	rs10761763	rs7924036	10	65188318	0.871343	T	C	0.526456	0.999793	49.4094	2.1e-12	0.140941	0.020405	47.7091	4.9e-12	48.1768	3.9e-12
	rs1535741	rs2761589	11	31375072	0.484482	T	C	0.358989	0.99433	47.9484	4.4e-12	0.147099	0.0212901	47.7379	4.9e-12	50.1451	1.4e-12
	rs16922084	rs2761589	11	31371109	0.48448	C	T	0.358916	0.994369	48.073	4.1e-12	0.147107	0.0212909	47.7393	4.9e-12	50.106	1.5e-12
	rs208066	rs2761589	11	31156206	0.484308	C	G	0.629848	0.998999	48.203	3.8e-12	-0.145824	0.0211086	47.7239	4.9e-12	49.9536	1.6e-12
	rs3956912	rs7924036	10	65205881	0.871343	C	T	0.526459	0.99984	49.3741	2.1e-12	0.140989	0.0204046	47.7436	4.9e-12	48.2137	3.8e-12
	rs4922859	rs2761589	11	31382517	0.484495	A	G	0.359146	0.994615	48.0904	4.1e-12	0.147051	0.0212844	47.7323	4.9e-12	50.1176	1.4e-12
	rs494464	rs2761589	11	31386150	0.484496	C	T	0.358933	0.994388	48.0416	4.2e-12	0.147112	0.0212902	47.7461	4.9e-12	50.1648	1.4e-12
	rs6484501	rs2761589	11	31373100	0.48448	G	T	0.358917	0.994375	48.0739	4.1e-12	0.147108	0.0212908	47.7405	4.9e-12	50.1065	1.5e-12
	rs7077580	rs7924036	10	65180885	0.871343	G	A	0.526517	0.999582	49.4056	2.1e-12	0.141006	0.0204091	47.734	4.9e-12	48.2358	3.8e-12
	rs7909269	rs7924036	10	65177766	0.871343	G	A	0.526523	0.999836	49.427	2.1e-12	0.140975	0.0204064	47.7258	4.9e-12	48.2247	3.8e-12
	rs7923544	rs7924036	10	65182256	0.871343	T	G	0.526462	0.999781	49.4014	2.1e-12	0.140942	0.0204051	47.7094	4.9e-12	48.1741	3.9e-12
	rs10740125	rs7924036	10	65209609	0.871343	T	C	0.526448	0.999834	49.3306	2.2e-12	0.140895	0.0204047	47.6796	5e-12	48.1484	4e-12
	rs10740126	rs7924036	10	65210935	0.871343	A	G	0.526482	0.999792	49.2973	2.2e-12	0.140902	0.0204051	47.6824	5e-12	48.1388	4e-12
	rs10761758	rs7924036	10	65172747	0.871342	A	T	0.526529	0.999869	49.3551	2.1e-12	0.140902	0.0204061	47.6774	5e-12	48.1782	3.9e-12
	rs3740331	rs7924036	10	65192288	0.871343	G	A	0.526459	0.999785	49.3681	2.1e-12	0.140896	0.0204051	47.6784	5e-12	48.1396	4e-12
	rs7092784	rs7924036	10	65214749	0.871343	C	T	0.52647	0.999793	49.3301	2.2e-12	0.140934	0.020405	47.7048	5e-12	48.172	3.9e-12
	rs942272	rs2761589	11	31364368	0.48448	C	T	0.358951	0.994433	47.9413	4.4e-12	0.146986	0.0212891	47.6689	5e-12	50.0264	1.5e-12
	rs10761756	rs7924036	10	65172328	0.871342	C	T	0.526805	1	49.1034	2.4e-12	0.140964	0.0204208	47.6506	5.1e-12	48.0859	4.1e-12
	rs10822163	rs7924036	10	65124098	0.871279	C	G	0.526556	0.999594	49.2249	2.3e-12	0.140847	0.0204068	47.6373	5.1e-12	48.1231	4e-12
	rs2393977	rs7924036	10	65247609	0.87135	A	C	0.526547	0.999529	49.2347	2.3e-12	0.140887	0.0204082	47.6574	5.1e-12	48.089	4.1e-12
	rs286653	rs2761589	11	31227824	0.484322	C	T	0.630902	0.999242	47.8483	4.6e-12	-0.145753	0.0211177	47.6371	5.1e-12	49.8199	1.7e-12
	rs56402103	rs2761589	11	31106074	0.484229	T	G	0.632529	0.997166	51.1432	8.6e-13	0.14603	0.0211583	47.6347	5.1e-12	47.2927	6.1e-12
	rs7085621	rs7924036	10	65208926	0.871343	T	C	0.526448	0.999832	49.3082	2.2e-12	0.14085	0.0204047	47.6489	5.1e-12	48.1183	4e-12
	rs9971609	rs2761589	11	31434104	0.484567	C	T	0.359534	0.992414	47.9534	4.4e-12	0.147086	0.0213043	47.6659	5.1e-12	50.0641	1.5e-12
	rs10761771	rs7924036	10	65230164	0.87135	T	C	0.526507	0.999458	49.2628	2.2e-12	0.140799	0.0204091	47.5939	5.2e-12	48.0802	4.1e-12
	rs11824421	rs2761589	11	31064570	0.484229	T	C	0.632516	0.997267	51.0993	8.8e-13	0.145973	0.0211568	47.6043	5.2e-12	47.263	6.2e-12
	rs4067330	rs2761589	11	31087870	0.484229	T	C	0.632558	0.997156	51.1131	8.7e-13	0.146011	0.0211586	47.6208	5.2e-12	47.2948	6.1e-12
	rs7896783	rs7924036	10	65162153	0.871342	G	A	0.526869	0.999095	49.3317	2.2e-12	0.140852	0.0204129	47.6118	5.2e-12	48.0709	4.1e-12
	rs10761750	rs7924036	10	65128619	0.871281	G	A	0.526361	0.99991	49.2349	2.3e-12	0.140756	0.0204043	47.5875	5.3e-12	48.0361	4.2e-12
	rs1834490	rs2761589	11	31123382	0.484229	G	A	0.632546	0.996752	51.113	8.7e-13	0.145945	0.0211626	47.5597	5.3e-12	47.217	6.4e-12
	rs2393966	rs7924036	10	65134814	0.871292	T	G	0.526558	0.999349	49.2091	2.3e-12	0.140788	0.0204108	47.579	5.3e-12	48.0227	4.2e-12
	rs61878168	rs2761589	11	31050135	0.484229	T	C	0.632521	0.997276	51.0699	8.9e-13	0.145936	0.0211568	47.5796	5.3e-12	47.2331	6.3e-12
	rs674035	rs2761589	11	31399014	0.4845	G	A	0.358891	0.995456	47.615	5.2e-12	0.14679	0.0212797	47.5843	5.3e-12	50.005	1.5e-12
	rs7915779	rs7924036	10	65244244	0.87135	G	C	0.526558	0.999539	49.1681	2.3e-12	0.140756	0.0204084	47.5676	5.3e-12	47.9973	4.3e-12
	rs4486511	rs7924036	10	65264266	0.871351	C	T	0.526591	0.999849	48.9924	2.6e-12	0.140685	0.020404	47.5406	5.4e-12	47.9505	4.4e-12
	rs485265	rs2761589	11	31407788	0.484503	G	A	0.359263	0.99557	47.6106	5.2e-12	0.146662	0.0212729	47.5313	5.4e-12	49.9337	1.6e-12
	rs578666	rs2761589	11	31404484	0.484502	G	A	0.359269	0.995524	47.6162	5.2e-12	0.146652	0.0212731	47.5239	5.4e-12	49.9239	1.6e-12
	rs10761772	rs7924036	10	65235829	0.87135	G	T	0.526549	0.999544	49.1297	2.4e-12	0.140661	0.0204082	47.5049	5.5e-12	47.9534	4.4e-12
	rs17425442	rs2761589	11	31118715	0.484229	C	G	0.63244	0.996891	51.0774	8.9e-13	0.145839	0.0211604	47.5009	5.5e-12	47.1863	6.5e-12
	rs10733792	rs7924036	10	65232539	0.87135	A	G	0.526549	0.999532	49.0936	2.4e-12	0.140605	0.0204082	47.4669	5.6e-12	47.9275	4.4e-12
	rs10822153	rs7924036	10	65056813	0.871241	C	A	0.527126	0.999632	49.4473	2e-12	0.140618	0.020407	47.4814	5.6e-12	47.9428	4.4e-12
	rs10995477	rs7924036	10	65010672	0.871118	T	C	0.526934	0.999532	49.136	2.4e-12	0.140599	0.0204077	47.4651	5.6e-12	47.8729	4.5e-12
	rs2393969	rs7924036	10	65140440	0.871292	A	C	0.528378	0.998318	48.4255	3.4e-12	0.140689	0.0204221	47.4594	5.6e-12	47.926	4.4e-12
	rs7909960	rs7924036	10	65239177	0.87135	T	A	0.52657	0.999488	49.117	2.4e-12	0.140627	0.0204088	47.4792	5.6e-12	47.907	4.5e-12
	rs7912893	rs7924036	10	65162000	0.871342	T	A	0.526723	0.999619	49.1907	2.3e-12	0.140619	0.0204077	47.4792	5.6e-12	47.9356	4.4e-12
	rs10761751	rs7924036	10	65154885	0.871292	A	G	0.526621	0.999444	49.1331	2.4e-12	0.140545	0.0204085	47.4255	5.7e-12	47.8803	4.5e-12
	rs281379	rs838133	19	49214274	0.774684	G	A	0.476407	1	31.2314	2.3e-08	-0.140865	0.0204532	47.4332	5.7e-12	47.0135	7e-12
	rs2893919	rs7924036	10	65134778	0.871292	G	A	0.526492	0.999572	49.0762	2.5e-12	0.140571	0.0204082	47.444	5.7e-12	47.887	4.5e-12
	rs6479896	rs7924036	10	65126832	0.87128	T	C	0.526364	1	49.1126	2.4e-12	0.140537	0.020404	47.4404	5.7e-12	47.921	4.4e-12
	rs7076310	rs7924036	10	65135672	0.871292	C	A	0.526317	0.99992	49.134	2.4e-12	0.140532	0.0204042	47.4367	5.7e-12	47.8819	4.5e-12
	rs7095571	rs7924036	10	65150959	0.871292	T	G	0.526617	0.999444	49.1659	2.4e-12	0.140567	0.0204084	47.4402	5.7e-12	47.8976	4.5e-12
	rs796341	rs2761589	11	31414151	0.484505	G	A	0.35926	0.995606	47.5298	5.4e-12	0.14649	0.0212728	47.4207	5.7e-12	49.8191	1.7e-12
	rs12355784	rs7924036	10	65121565	0.871277	C	A	0.526315	0.999922	49.0488	2.5e-12	0.140435	0.0204035	47.3736	5.9e-12	47.8148	4.7e-12
	rs4310508	rs7924036	10	65138573	0.871292	A	G	0.52631	0.999915	49.0035	2.6e-12	0.140398	0.020404	47.3469	5.9e-12	47.7999	4.7e-12
	rs61878204	rs2761589	11	31058768	0.484229	C	T	0.632408	0.997348	50.7075	1.1e-12	0.1456	0.0211553	47.3678	5.9e-12	47.0259	7e-12
	rs2861449	rs2761589	11	31348937	0.484479	A	G	0.357073	0.994416	47.9965	4.3e-12	0.146649	0.0213162	47.3301	6e-12	49.6019	1.9e-12
	rs1407257	rs2761589	11	31060561	0.484229	G	T	0.632403	0.99737	50.6476	1.1e-12	0.145508	0.021155	47.3096	6.1e-12	46.9716	7.2e-12
	rs2761593	rs2761589	11	31326752	0.484411	G	T	0.356823	0.994994	47.7552	4.8e-12	0.14657	0.0213141	47.2883	6.1e-12	49.5837	1.9e-12
	rs10740129	rs7924036	10	65250808	0.87135	G	A	0.5266	0.999567	48.84	2.8e-12	0.140248	0.0204071	47.2317	6.3e-12	47.6406	5.1e-12
	rs10822156	rs7924036	10	65080727	0.871254	T	C	0.527017	0.999881	49.2375	2.3e-12	0.140252	0.0204039	47.2487	6.3e-12	47.6981	5e-12
	rs2194923	rs2761589	11	31066611	0.484229	G	A	0.63242	0.997338	50.6915	1.1e-12	0.145372	0.0211552	47.2201	6.3e-12	46.8895	7.5e-12
	rs4400684	rs7924036	10	65012687	0.871145	A	G	0.527042	0.999603	49.0407	2.5e-12	0.140256	0.0204068	47.2381	6.3e-12	47.6633	5.1e-12
	rs2616792	rs2761589	11	31324298	0.484411	T	G	0.356269	0.994991	47.6351	5.1e-12	0.146506	0.0213217	47.2138	6.4e-12	49.379	2.1e-12
	rs10509189	rs7924036	10	65264126	0.871351	T	C	0.526508	0.999879	48.6659	3e-12	0.1401	0.0204033	47.1492	6.6e-12	47.5559	5.3e-12
	rs10740115	rs7924036	10	65094990	0.871258	G	A	0.526986	0.999873	49.142	2.4e-12	0.14011	0.0204041	47.1524	6.6e-12	47.5982	5.2e-12
	rs10822158	rs7924036	10	65094383	0.871258	A	G	0.526986	0.999875	49.146	2.4e-12	0.140116	0.0204042	47.1564	6.6e-12	47.6024	5.2e-12
	rs2447671	rs2761589	11	31334323	0.484412	G	A	0.357083	0.995318	47.8408	4.6e-12	0.146282	0.0213051	47.1426	6.6e-12	49.4598	2e-12
	rs9971352	rs7924036	10	65265108	0.871351	A	T	0.526516	0.999903	48.6656	3e-12	0.14008	0.0204033	47.1358	6.6e-12	47.5411	5.4e-12
	rs10761742	rs7924036	10	65085048	0.871255	A	G	0.52699	0.999885	49.0179	2.5e-12	0.140029	0.0204036	47.1001	6.7e-12	47.541	5.4e-12
	rs10822161	rs7924036	10	65118203	0.871269	G	A	0.526637	0.999581	48.9821	2.6e-12	0.140076	0.0204072	47.1149	6.7e-12	47.5593	5.3e-12
	rs2616815	rs2761589	11	31327316	0.484411	C	T	0.356594	0.995061	47.5643	5.3e-12	0.146339	0.0213172	47.1262	6.7e-12	49.3836	2.1e-12
	rs4454603	rs7924036	10	65012750	0.871145	C	T	0.527102	0.999508	48.8981	2.7e-12	0.140095	0.0204081	47.1233	6.7e-12	47.5788	5.3e-12
	rs4595427	rs7924036	10	65012944	0.871148	A	C	0.527112	0.999315	48.7521	2.9e-12	0.140057	0.0204109	47.085	6.8e-12	47.5081	5.5e-12
	rs7070296	rs7924036	10	65070438	0.87125	T	A	0.527008	0.99985	49.0099	2.5e-12	0.140008	0.0204039	47.0846	6.8e-12	47.5247	5.4e-12
	rs7923609	rs7924036	10	65133822	0.871289	A	G	0.526318	1	48.7875	2.9e-12	0.140037	0.0204051	47.0987	6.8e-12	47.5378	5.4e-12
	rs10740116	rs7924036	10	65094992	0.871258	T	C	0.526972	0.999915	48.9861	2.6e-12	0.139956	0.0204036	47.0511	6.9e-12	47.4966	5.5e-12
	rs10822160	rs7924036	10	65112796	0.871265	T	G	0.527044	0.999566	48.9984	2.6e-12	0.139987	0.0204073	47.0549	6.9e-12	47.5034	5.5e-12
	rs1323738	rs2761589	11	31344898	0.484412	T	C	0.356736	0.995539	47.5829	5.3e-12	0.146175	0.0213094	47.0545	6.9e-12	49.3245	2.2e-12
	rs7922587	rs7924036	10	65069614	0.871249	T	C	0.526985	0.99984	49.0008	2.6e-12	0.139972	0.0204035	47.0618	6.9e-12	47.52	5.4e-12
	rs10761752	rs7924036	10	65160321	0.871312	T	C	0.526508	0.999207	48.6619	3e-12	0.139981	0.0204101	47.0377	7e-12	47.4374	5.7e-12
	rs10761778	rs7924036	10	65273782	0.871367	A	G	0.526505	0.999934	48.5059	3.3e-12	0.139909	0.0204031	47.0219	7e-12	47.4187	5.7e-12
	rs10835763	rs2761589	11	31345574	0.484412	G	A	0.356849	0.995395	47.6617	5.1e-12	0.146123	0.0213086	47.0247	7e-12	49.3033	2.2e-12
	rs7910927	rs7924036	10	65138910	0.871292	T	G	0.526555	0.999769	48.6706	3e-12	0.139943	0.020406	47.0315	7e-12	47.4225	5.7e-12
	rs4405189	rs7924036	10	65013935	0.871167	A	G	0.526986	0.999343	48.7052	3e-12	0.139912	0.0204096	46.9939	7.1e-12	47.4059	5.8e-12
	rs7122895	rs2761589	11	31346620	0.484413	G	C	0.356849	0.995392	47.6398	5.1e-12	0.146069	0.0213086	46.99	7.1e-12	49.268	2.2e-12
	rs7928522	rs2761589	11	31336977	0.484412	A	G	0.35684	0.995382	47.6763	5e-12	0.1461	0.0213089	47.0091	7.1e-12	49.2857	2.2e-12
	rs10761779	rs7924036	10	65274927	0.871373	A	G	0.526436	1	48.5746	3.2e-12	0.139815	0.0204057	46.9469	7.3e-12	47.3195	6e-12
	rs838147	rs838133	19	49246866	0.774766	A	G	0.500669	0.996832	33.0835	8.8e-09	0.139965	0.0204328	46.9223	7.4e-12	46.7276	8.2e-12
	rs7895472	rs7924036	10	64961412	0.871107	G	A	0.526898	0.999758	48.5231	3.3e-12	0.13962	0.0204049	46.8195	7.8e-12	47.2132	6.4e-12
	rs10761729	rs7924036	10	64995604	0.871111	G	C	0.526914	0.999746	48.3806	3.5e-12	0.139552	0.0204047	46.775	8e-12	47.1542	6.6e-12
	rs7895610	rs7924036	10	64961659	0.871107	C	T	0.526904	0.999779	48.4877	3.3e-12	0.139555	0.0204048	46.7765	8e-12	47.1695	6.5e-12
	rs208078	rs2761589	11	31128721	0.484304	G	T	0.366895	0.993786	51.3593	7.7e-13	-0.144935	0.0212021	46.7296	8.1e-12	46.5181	9.1e-12
	rs4399232	rs7924036	10	64999490	0.871111	C	T	0.526921	0.999731	48.3551	3.6e-12	0.139506	0.0204047	46.744	8.1e-12	47.1296	6.6e-12
	rs10761727	rs7924036	10	64995493	0.871111	C	T	0.526913	0.999773	48.3529	3.6e-12	0.139445	0.0204046	46.7037	8.3e-12	47.0743	6.8e-12
	rs10822149	rs7924036	10	64987412	0.871111	G	A	0.526905	0.999758	48.351	3.6e-12	0.139439	0.0204048	46.6984	8.3e-12	47.0528	6.9e-12
	rs4379723	rs7924036	10	64963449	0.871108	T	C	0.526858	0.999785	48.346	3.6e-12	0.13939	0.0204046	46.6665	8.4e-12	47.085	6.8e-12
	rs1935	rs7924036	10	64927823	0.871092	C	G	0.526659	1	47.8012	4.7e-12	0.139278	0.0204109	46.5628	8.9e-12	47.0523	6.9e-12
	rs10761723	rs7924036	10	64955581	0.871103	C	T	0.526951	0.999661	48.1864	3.9e-12	0.13908	0.0204064	46.4511	9.4e-12	46.8837	7.5e-12
	rs838144	rs838133	19	49250239	0.7748	C	T	0.500311	0.99223	32.6416	1.1e-08	0.139454	0.0204776	46.3772	9.8e-12	46.23	1.1e-11
	rs17145750	rs33951980	7	73026378	0.89973	C	T	0.839096	1	41.6276	1.1e-10	0.188802	0.0277337	46.3447	9.9e-12	46.858	7.6e-12
	rs10822145	rs7924036	10	64934548	0.871092	C	T	0.524153	0.998077	47.7866	4.8e-12	0.138824	0.0204174	46.2305	1.1e-11	46.5423	9e-12
	rs1475558	rs2761589	11	31263428	0.484363	T	C	0.631921	0.998847	48.0109	4.2e-12	-0.14343	0.021135	46.0548	1.1e-11	48.4986	3.3e-12
	rs2470893	rs2472297	15	75019449	1.00291	C	T	0.670263	1	37.246	1e-09	0.147366	0.0216763	46.2195	1.1e-11	48.0474	4.2e-12
	rs2774402	rs2761589	11	31312897	0.484397	G	C	0.367581	0.996502	47.2865	6.1e-12	0.143151	0.0211662	45.7409	1.3e-11	48.0919	4.1e-12
	rs2774403	rs2761589	11	31320530	0.484407	A	T	0.368138	0.995103	47.2527	6.2e-12	0.143281	0.0211686	45.8136	1.3e-11	48.1502	3.9e-12
	rs7075901	rs7924036	10	65280994	0.871379	C	A	0.528123	0.998227	47.558	5.3e-12	0.138272	0.0204243	45.8329	1.3e-11	46.2955	1e-11
	rs10761716	rs7924036	10	64882300	0.871034	C	G	0.559733	0.994368	44.0048	3.3e-11	0.139083	0.0205856	45.648	1.4e-11	45.6475	1.4e-11
	rs11031327	rs2761589	11	31254517	0.484363	G	C	0.632522	0.998845	47.2964	6.1e-12	-0.142799	0.0211407	45.6263	1.4e-11	48.0303	4.2e-12
	rs1231281	rs838133	19	49239200	0.77475	G	A	0.500538	0.997463	32.248	1.4e-08	-0.138038	0.0204266	45.6674	1.4e-11	45.312	1.7e-11
	rs2761589	rs2761589	11	31311429	0.484397	C	G	0.37017	0.996017	46.3342	1e-11	0.142762	0.0211403	45.6038	1.4e-11	48.1771	3.9e-12
	rs7082470	rs7924036	10	65277026	0.871378	G	A	0.528101	0.998325	47.3546	5.9e-12	0.137984	0.0204233	45.646	1.4e-11	46.1317	1.1e-11
	rs11031338	rs2761589	11	31302990	0.484364	A	T	0.633063	0.998416	47.0651	6.9e-12	-0.142699	0.0211567	45.4932	1.5e-11	47.7973	4.7e-12
	rs418464	rs838133	19	49239026	0.77475	T	C	0.500169	0.997921	32.2827	1.3e-08	-0.13789	0.0204279	45.5638	1.5e-11	45.3497	1.6e-11
	rs6479877	rs7924036	10	64878118	0.871008	C	G	0.557649	0.988939	43.7709	3.7e-11	0.139275	0.0206341	45.5587	1.5e-11	45.618	1.4e-11
	rs7113880	rs2761589	11	31279557	0.484364	A	G	0.631958	0.999433	47.3221	6e-12	-0.142495	0.0211314	45.4722	1.5e-11	47.9335	4.4e-12
	rs7116443	rs2761589	11	31283170	0.484364	T	C	0.632198	0.999472	47.3584	5.9e-12	-0.142567	0.0211343	45.5049	1.5e-11	47.9356	4.4e-12
	rs973579	rs838133	19	49241976	0.774754	A	G	0.500174	0.998485	32.2784	1.3e-08	-0.137863	0.020421	45.5769	1.5e-11	45.3212	1.7e-11
	rs10835758	rs2761589	11	31294231	0.484364	T	C	0.632182	0.999452	47.1679	6.5e-12	-0.142401	0.0211342	45.3995	1.6e-11	47.8166	4.7e-12
	rs11031332	rs2761589	11	31278962	0.484364	T	C	0.632175	0.999449	47.2526	6.2e-12	-0.142343	0.0211338	45.3646	1.6e-11	47.7948	4.7e-12
	rs2210144	rs2761589	11	31253268	0.484363	G	T	0.6325	0.999432	47.0379	7e-12	-0.142352	0.0211362	45.3602	1.6e-11	47.7028	5e-12
	rs2452170	rs838133	19	49213504	0.774667	G	A	0.468498	0.997739	30.0415	4.2e-08	-0.137934	0.0204795	45.3634	1.6e-11	45.0901	1.9e-11
	rs452270	rs838133	19	49239053	0.77475	T	C	0.503367	0.989833	32.121	1.4e-08	-0.138125	0.0205063	45.3701	1.6e-11	45.0797	1.9e-11
	rs11031330	rs2761589	11	31275073	0.484364	G	A	0.632364	0.99945	47.0982	6.8e-12	-0.142228	0.0211352	45.2852	1.7e-11	47.679	5e-12
	rs13095	rs7924036	10	64914372	0.871088	G	C	0.527668	0.999109	46.81	7.8e-12	0.137325	0.0204138	45.2535	1.7e-11	45.6067	1.4e-11
	rs2638282	rs838133	19	49213833	0.774675	G	A	0.468496	0.99793	29.9482	4.4e-08	-0.137751	0.0204777	45.2508	1.7e-11	44.9878	2e-11
	rs676388	rs838133	19	49211969	0.774634	T	C	0.466581	1	29.8895	4.6e-08	-0.13774	0.0204625	45.311	1.7e-11	44.7272	2.3e-11
	rs7073746	rs7924036	10	64904071	0.871083	A	G	0.527628	0.998537	46.6973	8.3e-12	0.137368	0.0204193	45.2573	1.7e-11	45.6288	1.4e-11
	rs10835756	rs2761589	11	31267622	0.484364	C	T	0.63255	0.999577	46.8841	7.5e-12	-0.141988	0.0211364	45.1274	1.8e-11	47.487	5.5e-12
	rs10835759	rs2761589	11	31301147	0.484364	G	A	0.632583	0.999483	46.8789	7.6e-12	-0.142032	0.0211383	45.1474	1.8e-11	47.4757	5.6e-12
	rs11031342	rs2761589	11	31309818	0.484397	G	A	0.63246	0.996795	46.6685	8.4e-12	-0.142209	0.0211644	45.1483	1.8e-11	47.4263	5.7e-12
	rs12222329	rs2761589	11	31274340	0.484364	T	C	0.632545	0.999473	47.0007	7.1e-12	-0.142153	0.0211371	45.2294	1.8e-11	47.5916	5.2e-12
	rs12788257	rs2761589	11	31255045	0.484363	T	C	0.632515	0.999451	46.8734	7.6e-12	-0.142144	0.0211363	45.2269	1.8e-11	47.5645	5.3e-12
	rs12796587	rs2761589	11	31266443	0.484364	T	C	0.632505	0.999528	46.9113	7.4e-12	-0.14201	0.0211365	45.1409	1.8e-11	47.5019	5.5e-12
	rs1929019	rs2761589	11	31267030	0.484364	C	T	0.632551	0.999574	46.9074	7.4e-12	-0.142026	0.0211364	45.1518	1.8e-11	47.5077	5.5e-12
	rs2616799	rs2761589	11	31319044	0.484402	T	C	0.367516	0.996611	46.5793	8.8e-12	0.142233	0.0211664	45.1554	1.8e-11	47.4159	5.7e-12
	rs2761594	rs2761589	11	31318244	0.484399	A	G	0.367516	0.99673	46.5746	8.8e-12	0.142202	0.0211651	45.1407	1.8e-11	47.3881	5.8e-12
	rs838145	rs838133	19	49248730	0.774782	G	A	0.45735	0.986765	30.1963	3.9e-08	0.138494	0.0206141	45.1374	1.8e-11	45.781	1.3e-11
	rs11031337	rs2761589	11	31301392	0.484364	C	A	0.632594	0.999448	46.8093	7.8e-12	-0.141966	0.0211388	45.103	1.9e-11	47.4309	5.7e-12
	rs2150212	rs2761589	11	31255935	0.484363	G	A	0.632552	0.999542	46.708	8.2e-12	-0.141881	0.0211368	45.058	1.9e-11	47.4055	5.8e-12
	rs2985140	rs2761589	11	31315886	0.484398	C	T	0.369597	0.995722	46.1253	1.1e-11	0.141926	0.021148	45.0388	1.9e-11	47.4557	5.6e-12
	rs584768	rs838133	19	49213284	0.774663	G	A	0.468415	0.99771	29.8494	4.7e-08	-0.137513	0.0204796	45.0862	1.9e-11	44.8038	2.2e-11
	rs7121949	rs2761589	11	31288160	0.484364	G	T	0.632581	0.999476	46.8048	7.8e-12	-0.141901	0.0211378	45.0661	1.9e-11	47.4064	5.8e-12
	rs11882796	rs838133	19	49225766	0.774731	A	T	0.458194	0.997444	30.9887	2.6e-08	-0.137618	0.0205111	45.0167	2e-11	44.5422	2.5e-11
	rs2183484	rs2761589	11	31259370	0.484363	G	A	0.632461	0.999422	46.6894	8.3e-12	-0.141768	0.0211375	44.9833	2e-11	47.3335	6e-12
	rs3802915	rs2761589	11	31284798	0.484364	G	A	0.632605	0.99957	46.8194	7.8e-12	-0.141815	0.0211376	45.0122	2e-11	47.3521	5.9e-12
	rs6565174	rs4788415	16	30111904	0.553288	A	C	0.115891	1	36.0705	1.9e-09	-0.213239	0.0318509	44.8217	2.2e-11	48.6357	3.1e-12
	rs10835757	rs2761589	11	31281902	0.484364	G	A	0.632433	1	46.1235	1.1e-11	-0.141004	0.0211268	44.5444	2.5e-11	46.6477	8.5e-12
	rs1999250	rs2761589	11	31287455	0.484364	C	T	0.637275	0.987062	46.9229	7.4e-12	-0.142287	0.0213351	44.478	2.6e-11	46.8903	7.5e-12
	rs9638180	rs33951980	7	72998952	0.899685	A	G	0.8041	0.999717	39.1897	3.8e-10	0.171223	0.0256776	44.4646	2.6e-11	46.3129	1e-11
	rs35106244	rs838133	19	49203829	0.774545	C	T	0.537575	0.947013	30.2537	3.8e-08	-0.140086	0.0210436	44.3148	2.8e-11	44.0687	3.2e-11
	rs380743	rs838133	19	49241014	0.774753	G	A	0.506149	0.987193	30.8295	2.8e-08	-0.136521	0.0205382	44.185	3e-11	43.9042	3.4e-11
	rs427248	rs838133	19	49241015	0.774753	C	T	0.506173	0.98754	30.6368	3.1e-08	-0.13639	0.020534	44.118	3.1e-11	43.8336	3.6e-11
	rs35659126	rs33951980	7	72988069	0.89967	C	T	0.804133	0.999943	38.8964	4.5e-10	0.170394	0.0256773	44.0359	3.2e-11	45.8544	1.3e-11
	rs9638182	rs33951980	7	72999105	0.899685	T	G	0.804012	0.999548	38.5651	5.3e-10	0.169974	0.0256736	43.8321	3.6e-11	45.6445	1.4e-11
	rs1051921	rs33951980	7	73007943	0.899697	G	A	0.802988	1	37.8688	7.6e-10	0.169041	0.0256209	43.5306	4.2e-11	45.4241	1.6e-11
	rs35866622	rs838133	19	49218060	0.774704	C	T	0.501719	0.990855	28.6943	8.5e-08	-0.135282	0.0205058	43.5239	4.2e-11	43.6239	4e-11
	rs660745	rs838133	19	49219459	0.77471	T	C	0.455137	0.994003	30.5789	3.2e-08	-0.135493	0.0205507	43.4688	4.3e-11	42.6473	6.6e-11
	rs11974409	rs33951980	7	72989390	0.899672	A	G	0.804038	0.999708	38.298	6.1e-10	0.16919	0.0256736	43.4287	4.4e-11	45.2076	1.8e-11
	rs35107470	rs2472297	15	74817689	1.00278	A	G	0.677569	0.942692	34.7619	3.7e-09	0.147555	0.022457	43.1725	5e-11	44.5622	2.5e-11
	rs13225660	rs33951980	7	73006388	0.899695	C	T	0.803002	0.99988	37.3653	9.8e-10	0.167941	0.0256213	42.9645	5.6e-11	44.8784	2.1e-11
	rs35866503	rs33951980	7	73005776	0.899694	C	T	0.803005	0.999907	37.3673	9.8e-10	0.167948	0.0256214	42.9679	5.6e-11	44.8822	2.1e-11
	rs13240994	rs33951980	7	73016862	0.899709	T	C	0.801992	0.999595	38.0106	7e-10	0.167439	0.0255779	42.8534	5.9e-11	44.7455	2.2e-11
	rs34594435	rs33951980	7	72977249	0.899655	C	T	0.804157	0.998905	37.9666	7.2e-10	0.167934	0.0256924	42.7235	6.3e-11	44.4819	2.6e-11
	rs34346326	rs33951980	7	73016181	0.899708	T	C	0.801993	0.999406	37.8072	7.8e-10	0.166913	0.02558	42.5776	6.8e-11	44.4362	2.6e-11
	rs35368205	rs33951980	7	73017657	0.899711	C	T	0.801772	1	38.0468	6.9e-10	0.166463	0.025515	42.5645	6.8e-11	44.5063	2.5e-11
	rs13247874	rs33951980	7	73010442	0.8997	C	T	0.802599	0.997449	36.8741	1.3e-09	0.167049	0.0256359	42.4613	7.2e-11	44.4121	2.7e-11
	rs56383788	rs33951980	7	73016400	0.899709	A	G	0.799164	0.995011	38.3883	5.8e-10	0.165343	0.0254942	42.062	8.8e-11	44.0649	3.2e-11
	rs519757	rs838133	19	49224966	0.774729	A	C	0.390555	0.995917	29.1221	6.8e-08	-0.13552	0.0209503	41.8433	9.9e-11	41.0901	1.5e-10
	rs13226650	rs33951980	7	73017005	0.89971	A	G	0.801809	0.998902	36.9108	1.2e-09	0.165304	0.0255713	41.7891	1e-10	43.6279	4e-11
	rs35493868	rs33951980	7	73039406	0.899764	C	G	0.797579	0.995358	36.6667	1.4e-09	0.16391	0.0254175	41.5859	1.1e-10	42.8806	5.8e-11
	rs3859439	rs838133	19	49224389	0.774728	T	C	0.390847	0.996159	29.2031	6.5e-08	-0.135169	0.0209458	41.6447	1.1e-10	40.8189	1.7e-10
	rs55747707	rs33951980	7	73037366	0.899757	G	A	0.79761	0.995534	36.6784	1.4e-09	0.164135	0.0254168	41.7023	1.1e-10	43.0158	5.4e-11
	rs629504	rs838133	19	49223633	0.774726	C	G	0.391067	0.996521	29.0026	7.2e-08	-0.134808	0.0209406	41.4434	1.2e-10	40.6675	1.8e-10
	rs546308	rs838133	19	49223570	0.774726	G	A	0.39169	0.996262	28.5342	9.2e-08	-0.134086	0.0209372	41.0139	1.5e-10	40.1911	2.3e-10
	rs12979278	rs838133	19	49218602	0.774706	C	T	0.453773	0.99309	27.6277	1.5e-07	-0.131511	0.0205728	40.8633	1.6e-10	40.4172	2.1e-10
	rs11672900	rs838133	19	49220323	0.774713	A	G	0.455862	0.994585	28.1286	1.1e-07	-0.1313	0.0205489	40.8275	1.7e-10	40.0274	2.5e-10
	rs8103840	rs838133	19	49254955	0.774859	C	T	0.532377	0.977853	29.9148	4.5e-08	0.131786	0.0206604	40.6873	1.8e-10	41.6279	1.1e-10
	rs7896518	rs7924036	10	65104500	0.871261	A	G	0.572028	0.980633	51.0332	9.1e-13	0.132612	0.020809	40.6126	1.9e-10	41.5506	1.1e-10
	rs2210143	rs2761589	11	31300793	0.484364	T	G	0.679775	0.990672	49.2698	2.2e-12	-0.139208	0.0219168	40.3434	2.1e-10	42.8674	5.9e-11
	rs6957745	rs33951980	7	73056750	0.899926	T	C	0.796848	0.989753	32.8543	9.9e-09	0.161765	0.0254543	40.3875	2.1e-10	41.6397	1.1e-10
	rs62466318	rs33951980	7	73042085	0.899783	C	T	0.796991	0.993191	35.4704	2.6e-09	0.160604	0.0254206	39.9155	2.7e-10	41.3582	1.3e-10
	rs10822155	rs7924036	10	65071215	0.87125	C	A	0.583489	0.998923	50.0069	1.5e-12	0.13054	0.020685	39.827	2.8e-10	40.7682	1.7e-10
	rs10761737	rs7924036	10	65052205	0.871228	T	C	0.583488	0.997978	49.9264	1.6e-12	0.130513	0.0206946	39.7735	2.9e-10	40.7026	1.8e-10
	rs281377	rs838133	19	49206603	0.774558	C	T	0.569626	1	28.3236	1e-07	0.129884	0.0206243	39.6601	3e-10	39.1291	4e-10
	rs10761731	rs7924036	10	65027610	0.871225	A	T	0.581717	1	50.5098	1.2e-12	0.130089	0.0206677	39.6187	3.1e-10	40.3253	2.2e-10
	rs9787438	rs7924036	10	65038030	0.871226	G	C	0.582553	0.999918	50.4769	1.2e-12	0.130021	0.0206726	39.558	3.2e-10	40.3974	2.1e-10
	rs10761739	rs7924036	10	65062008	0.871246	G	C	0.582534	0.999599	50.4774	1.2e-12	0.129926	0.0206761	39.4871	3.3e-10	40.3898	2.1e-10
	rs169625	rs2761589	11	31135108	0.484308	T	G	0.385334	0.999113	41.7237	1.1e-10	-0.131592	0.0209443	39.4756	3.3e-10	39.8214	2.8e-10
	rs208076	rs2761589	11	31136776	0.484308	A	G	0.385334	0.999126	41.7228	1.1e-10	-0.131599	0.0209443	39.4798	3.3e-10	39.8245	2.8e-10
	rs208077	rs2761589	11	31136441	0.484308	A	C	0.38539	0.999122	41.5929	1.1e-10	-0.131518	0.0209443	39.4312	3.4e-10	39.7888	2.8e-10
	rs7073753	rs7924036	10	65062820	0.871246	C	T	0.582477	0.999835	50.447	1.2e-12	0.129805	0.0206733	39.4242	3.4e-10	40.3068	2.2e-10
	rs7084707	rs7924036	10	65052542	0.871228	C	T	0.582497	0.9999	50.3931	1.3e-12	0.12984	0.0206725	39.4487	3.4e-10	40.3243	2.2e-10
	rs208073	rs2761589	11	31140754	0.484308	T	G	0.385308	0.999118	41.6236	1.1e-10	-0.131415	0.0209446	39.3681	3.5e-10	39.7286	2.9e-10
	rs208074	rs2761589	11	31140075	0.484308	C	G	0.385308	0.999129	41.643	1.1e-10	-0.131448	0.0209445	39.3883	3.5e-10	39.7526	2.9e-10
	rs7090111	rs7924036	10	65077994	0.871253	C	G	0.58246	0.999773	50.3412	1.3e-12	0.129735	0.0206729	39.3834	3.5e-10	40.2481	2.2e-10
	rs148788997	rs4788415	16	30323168	0.553672	G	C	0.87565	0.954213	29.8257	4.7e-08	0.198237	0.0316181	39.3097	3.6e-10	42.7874	6.1e-11
	rs12978750	rs838133	19	49218430	0.774705	A	G	0.452574	0.993452	25.9583	3.5e-07	-0.12893	0.0205778	39.2563	3.7e-10	38.7601	4.8e-10
	rs12978752	rs838133	19	49218437	0.774705	A	C	0.452563	0.993428	25.9787	3.5e-07	-0.128963	0.0205779	39.2757	3.7e-10	38.7823	4.7e-10
	rs7075195	rs7924036	10	65050659	0.871227	A	G	0.582293	0.999323	50.172	1.4e-12	0.129554	0.0206776	39.2559	3.7e-10	40.1289	2.4e-10
	rs7088799	rs7924036	10	65016174	0.871208	T	G	0.582459	0.999545	50.1352	1.4e-12	0.129568	0.0206753	39.2729	3.7e-10	40.1079	2.4e-10
	rs10761741	rs7924036	10	65066186	0.871248	G	T	0.582491	0.999742	50.1266	1.4e-12	0.129437	0.0206742	39.1977	3.8e-10	40.0629	2.5e-10
	rs10822159	rs7924036	10	65096250	0.871258	C	T	0.582394	0.999926	50.0551	1.5e-12	0.12941	0.0206716	39.1911	3.8e-10	40.0585	2.5e-10
	rs7098181	rs7924036	10	65027143	0.871225	G	T	0.582594	0.999934	50.078	1.5e-12	0.129413	0.0206728	39.1883	3.8e-10	40.026	2.5e-10
	rs33988101	rs838133	19	49218111	0.774704	G	T	0.452574	0.993747	25.9014	3.6e-07	-0.128767	0.0205748	39.1684	3.9e-10	38.699	4.9e-10
	rs208112	rs2761589	11	31198934	0.48431	T	G	0.384706	0.999369	41.4954	1.2e-10	-0.130857	0.0209474	39.0237	4.2e-10	39.4636	3.3e-10
	rs471211	rs2761589	11	31225707	0.484321	G	A	0.384861	0.999182	41.3449	1.3e-10	-0.130838	0.0209493	39.0057	4.2e-10	39.4623	3.3e-10
	rs158137	rs2761589	11	31217988	0.484315	T	A	0.384863	0.999675	41.2784	1.3e-10	-0.130684	0.0209452	38.9294	4.4e-10	39.4005	3.5e-10
	rs158141	rs2761589	11	31212468	0.484315	C	G	0.384869	0.999745	41.2559	1.3e-10	-0.130711	0.0209443	38.9485	4.4e-10	39.4153	3.4e-10
	rs158145	rs2761589	11	31211625	0.484313	G	A	0.384867	0.999899	41.2024	1.4e-10	-0.130636	0.0209431	38.9085	4.4e-10	39.3727	3.5e-10
	rs158142	rs2761589	11	31212293	0.484314	G	A	0.384869	0.999785	41.1776	1.4e-10	-0.130569	0.020944	38.8648	4.5e-10	39.3302	3.6e-10
	rs208070	rs2761589	11	31146557	0.484308	A	G	0.385257	0.999175	41.0543	1.5e-10	-0.130549	0.0209455	38.8479	4.6e-10	39.2243	3.8e-10
	rs208099	rs2761589	11	31177296	0.48431	G	C	0.384754	0.999109	41.3101	1.3e-10	-0.130582	0.0209494	38.8532	4.6e-10	39.2985	3.6e-10
	rs158147	rs2761589	11	31209773	0.484313	A	C	0.384912	0.999734	41.069	1.5e-10	-0.130386	0.0209443	38.7552	4.8e-10	39.2042	3.8e-10
	rs208100	rs2761589	11	31171084	0.48431	T	C	0.385163	0.999197	41.0316	1.5e-10	-0.130275	0.0209455	38.6849	5e-10	39.1289	4e-10
	rs10740118	rs7924036	10	65101207	0.871259	G	C	0.58219	1	49.3783	2.1e-12	0.128469	0.020669	38.6327	5.1e-10	39.4969	3.3e-10
	rs208065	rs2761589	11	31157375	0.484308	G	A	0.38509	0.999058	40.821	1.7e-10	-0.130177	0.0209463	38.6235	5.1e-10	39.0327	4.2e-10
	rs208068	rs2761589	11	31151944	0.484308	C	T	0.385208	0.999133	40.7285	1.7e-10	-0.130109	0.020946	38.5847	5.2e-10	38.9826	4.3e-10
	rs6705235	rs1562308	2	61713580	0.875914	G	C	0.387377	0.998071	41.7677	1e-10	0.129568	0.0208562	38.5942	5.2e-10	40.6947	1.8e-10
	rs158149	rs2761589	11	31208954	0.484313	A	G	0.385097	0.999869	40.858	1.6e-10	-0.130032	0.0209413	38.5564	5.3e-10	38.9812	4.3e-10
	rs208086	rs2761589	11	31194624	0.48431	T	A	0.385031	0.999478	40.9895	1.5e-10	-0.130061	0.0209432	38.5665	5.3e-10	38.9746	4.3e-10
	rs208113	rs2761589	11	31198788	0.48431	T	C	0.385027	0.999608	40.9838	1.5e-10	-0.130027	0.0209431	38.5465	5.3e-10	38.9568	4.3e-10
	rs28749199	rs1562308	2	61827052	0.875965	A	G	0.413331	0.996145	42.7506	6.2e-11	0.128238	0.0206507	38.5625	5.3e-10	40.3123	2.2e-10
	rs4002471	rs838133	19	49215095	0.774689	C	T	0.452149	0.994786	25.5076	4.4e-07	-0.127749	0.0205676	38.5784	5.3e-10	38.1323	6.6e-10
	rs208084	rs2761589	11	31196772	0.48431	T	C	0.385035	0.99957	40.9489	1.6e-10	-0.129969	0.0209434	38.511	5.4e-10	38.9219	4.4e-10
	rs208104	rs2761589	11	31167203	0.48431	G	A	0.385105	0.999281	40.8865	1.6e-10	-0.129988	0.0209452	38.5158	5.4e-10	38.9109	4.4e-10
	rs4325736	rs1562308	2	61830144	0.875968	T	C	0.413349	0.99633	42.7965	6.1e-11	0.128144	0.0206489	38.5122	5.4e-10	40.2462	2.2e-10
	rs13413687	rs1562308	2	61835253	0.875974	C	T	0.414644	0.996601	42.7488	6.2e-11	0.128048	0.0206371	38.4987	5.5e-10	40.1692	2.3e-10
	rs208082	rs2761589	11	31197885	0.48431	A	G	0.385043	0.999399	40.8562	1.6e-10	-0.129976	0.0209456	38.507	5.5e-10	38.9244	4.4e-10
	rs208087	rs2761589	11	31193935	0.48431	T	G	0.385097	0.999571	40.8155	1.7e-10	-0.12991	0.0209433	38.4766	5.5e-10	38.908	4.4e-10
	rs208107	rs2761589	11	31164999	0.48431	G	A	0.385059	0.999287	40.7404	1.7e-10	-0.129935	0.0209453	38.4837	5.5e-10	38.865	4.5e-10
	rs6545887	rs1562308	2	61828818	0.875967	C	G	0.413644	0.996169	42.6111	6.7e-11	0.128118	0.0206472	38.5033	5.5e-10	40.2185	2.3e-10
	rs176374	rs2761589	11	31178560	0.48431	G	C	0.385089	0.999433	40.9437	1.6e-10	-0.129888	0.0209441	38.4602	5.6e-10	38.8739	4.5e-10
	rs208064	rs2761589	11	31158395	0.484309	G	A	0.385057	0.999169	40.7139	1.8e-10	-0.129905	0.0209458	38.4642	5.6e-10	38.8451	4.6e-10
	rs208085	rs2761589	11	31195157	0.48431	T	C	0.385093	0.999568	40.8036	1.7e-10	-0.129885	0.0209433	38.4616	5.6e-10	38.8947	4.5e-10
	rs208095	rs2761589	11	31179141	0.48431	T	C	0.38509	0.999433	40.9566	1.6e-10	-0.129909	0.0209441	38.4726	5.6e-10	38.887	4.5e-10
	rs3821222	rs1562308	2	61713526	0.875914	C	G	0.387325	0.998002	41.4652	1.2e-10	0.129348	0.0208578	38.4577	5.6e-10	40.5294	1.9e-10
	rs7080386	rs7924036	10	65048306	0.871227	C	A	0.584603	1	49.169	2.3e-12	0.128287	0.0206834	38.4702	5.6e-10	39.3654	3.5e-10
	rs208092	rs2761589	11	31189274	0.48431	A	T	0.385125	0.999307	40.6945	1.8e-10	-0.129796	0.020944	38.4065	5.7e-10	38.8338	4.6e-10
	rs208101	rs2761589	11	31170443	0.48431	G	T	0.385079	0.999377	40.8049	1.7e-10	-0.1298	0.0209443	38.4076	5.7e-10	38.806	4.7e-10
	rs208106	rs2761589	11	31165852	0.48431	T	A	0.385143	0.999313	40.6929	1.8e-10	-0.129815	0.0209449	38.4144	5.7e-10	38.8189	4.6e-10
	rs2554044	rs2761589	11	31161235	0.48431	T	A	0.385112	0.999253	40.5967	1.9e-10	-0.129838	0.0209455	38.4258	5.7e-10	38.8164	4.7e-10
	rs381149	rs2761589	11	31190631	0.48431	G	A	0.385098	0.999557	40.7638	1.7e-10	-0.129823	0.0209435	38.4243	5.7e-10	38.8527	4.6e-10
	rs208102	rs2761589	11	31167539	0.48431	C	T	0.385129	0.99933	40.6709	1.8e-10	-0.129756	0.0209448	38.3798	5.8e-10	38.7879	4.7e-10
	rs400964	rs2761589	11	31177260	0.48431	T	A	0.38512	0.999364	40.6981	1.8e-10	-0.129769	0.0209446	38.3882	5.8e-10	38.8153	4.7e-10
	rs7574631	rs1562308	2	61825142	0.875963	T	G	0.413666	0.995941	42.4439	7.3e-11	0.127951	0.0206502	38.3918	5.8e-10	40.1154	2.4e-10
	rs2421331	rs1562308	2	61835240	0.875974	G	T	0.414746	0.996666	42.6481	6.6e-11	0.127794	0.0206359	38.3505	5.9e-10	40.1058	2.4e-10
	rs6968170	rs33951980	7	73020676	0.899715	G	A	0.717075	0.998495	31.4387	2.1e-08	0.140166	0.0226338	38.3505	5.9e-10	38.9816	4.3e-10
	rs208109	rs2761589	11	31162595	0.48431	T	C	0.385016	0.999289	40.6013	1.9e-10	-0.129666	0.0209454	38.3243	6e-10	38.7318	4.9e-10
	rs7608483	rs1562308	2	61836235	0.875975	A	C	0.413486	0.996511	43.0195	5.4e-11	0.127642	0.0206455	38.2239	6.3e-10	39.93	2.6e-10
	rs61010704	rs33951980	7	73019975	0.899714	A	G	0.717034	0.99861	31.0713	2.5e-08	0.139347	0.0226341	37.9027	7.4e-10	38.512	5.4e-10
	rs4430924	rs1562308	2	61703856	0.875911	A	G	0.389534	0.997989	40.0492	2.5e-10	0.12827	0.0208365	37.8967	7.5e-10	39.9763	2.6e-10
	rs9679557	rs1562308	2	61709349	0.875912	C	A	0.390039	0.998266	40.0036	2.5e-10	0.128165	0.0208283	37.8641	7.6e-10	39.9785	2.6e-10
	rs1971183	rs1562308	2	61716924	0.875918	G	C	0.390301	0.997778	40.2373	2.2e-10	0.127868	0.0208308	37.6802	8.3e-10	39.7437	2.9e-10
	rs1186697	rs1562308	2	61661417	0.875901	G	A	0.389289	0.998658	40.1464	2.4e-10	0.127804	0.0208326	37.6357	8.5e-10	39.9362	2.6e-10
	rs2761588	rs2761589	11	31313761	0.484397	A	G	0.611428	0.995532	39.4297	3.4e-10	0.128069	0.0209403	37.4046	9.6e-10	38.0861	6.8e-10
	rs2441381	rs1562308	2	61798829	0.875955	C	T	0.411291	0.996199	41.5351	1.2e-10	0.126373	0.0206702	37.3783	9.7e-10	39.273	3.7e-10
	rs11691734	rs1562308	2	61702466	0.87591	C	T	0.390141	0.998484	39.541	3.2e-10	0.127247	0.0208249	37.3361	9.9e-10	39.418	3.4e-10
	rs1186711	rs1562308	2	61688505	0.875908	T	C	0.388699	0.998544	40.2145	2.3e-10	0.127341	0.0208405	37.335	9.9e-10	39.5035	3.3e-10
	rs2463100	rs1562308	2	61659199	0.875897	G	C	0.610609	0.998581	39.5772	3.2e-10	-0.127183	0.0208332	37.269	1e-09	39.5599	3.2e-10
	rs1186710	rs1562308	2	61688727	0.875908	T	A	0.38907	0.998811	39.9819	2.6e-10	0.126935	0.0208348	37.1178	1.1e-09	39.2977	3.6e-10
	rs1880866	rs1562308	2	61698972	0.87591	G	C	0.389652	0.998424	39.3846	3.5e-10	0.127058	0.0208323	37.1987	1.1e-09	39.2764	3.7e-10
	rs2518933	rs1562308	2	61797030	0.875955	C	A	0.413501	0.99638	41.8929	9.6e-11	0.125987	0.0206531	37.2119	1.1e-09	39.0881	4.1e-10
	rs2518937	rs1562308	2	61791954	0.875948	C	T	0.413652	0.996842	41.9568	9.3e-11	0.125788	0.0206476	37.1142	1.1e-09	39.1837	3.9e-10
	rs12713436	rs1562308	2	61691260	0.875908	T	C	0.388251	0.998377	39.7926	2.8e-10	0.126695	0.0208468	36.9351	1.2e-09	39.0666	4.1e-10
	rs13003376	rs1562308	2	61691440	0.875908	T	C	0.388198	0.998503	39.775	2.8e-10	0.126671	0.0208457	36.9247	1.2e-09	39.0137	4.2e-10
	rs778767	rs1562308	2	61787028	0.875943	C	G	0.387826	0.997731	41.071	1.5e-10	0.126875	0.0208608	36.9906	1.2e-09	39.0265	4.2e-10
	rs1475559	rs2761589	11	31263566	0.484363	C	G	0.390351	0.997717	39.9134	2.7e-10	-0.126861	0.0209083	36.8143	1.3e-09	37.5493	8.9e-10
	rs2863231	rs2761589	11	31796560	0.484747	A	G	0.356457	0.984802	37.6623	8.4e-10	0.130016	0.0214202	36.8426	1.3e-09	38.6266	5.1e-10
	rs6545871	rs1562308	2	61692203	0.875908	G	T	0.388854	0.998211	39.9748	2.6e-10	0.126433	0.0208403	36.8052	1.3e-09	38.9018	4.5e-10
	rs6975495	rs33951980	7	73034030	0.899748	A	G	0.716092	0.996476	30.5355	3.3e-08	0.137387	0.0226329	36.8476	1.3e-09	37.3142	1e-09
	rs778140	rs1562308	2	61682976	0.875907	C	T	0.388919	0.999103	39.3779	3.5e-10	0.126458	0.020836	36.8353	1.3e-09	38.9952	4.2e-10
	rs778768	rs1562308	2	61790289	0.875944	C	G	0.38774	0.996683	40.817	1.7e-10	0.126538	0.0208698	36.7627	1.3e-09	38.6272	5.1e-10
	rs1867839	rs1562308	2	61694797	0.875909	G	T	0.388445	0.998445	39.3944	3.5e-10	0.126269	0.020844	36.6971	1.4e-09	38.8065	4.7e-10
	rs2427885	rs1562308	2	61816777	0.875958	A	G	0.410536	0.99566	40.3967	2.1e-10	0.125264	0.0206774	36.6997	1.4e-09	38.7427	4.8e-10
	rs2442034	rs1562308	2	61615667	0.875875	G	A	0.61071	0.997763	38.9846	4.3e-10	-0.126207	0.02084	36.6754	1.4e-09	38.7525	4.8e-10
	rs2694625	rs1562308	2	61616055	0.875875	G	A	0.610721	0.997732	38.9003	4.5e-10	-0.126119	0.0208406	36.6218	1.4e-09	38.6563	5.1e-10
	rs2950268	rs1562308	2	61615763	0.875875	C	T	0.610685	0.997847	39.0361	4.2e-10	-0.126281	0.0208385	36.7236	1.4e-09	38.8011	4.7e-10
	rs3812316	rs33951980	7	73020337	0.899715	C	G	0.87187	1	30.4587	3.4e-08	0.184393	0.0304679	36.6273	1.4e-09	37.5493	8.9e-10
	rs4672445	rs1562308	2	61655008	0.875895	T	C	0.610659	0.998399	39.1728	3.9e-10	-0.126234	0.0208347	36.7094	1.4e-09	38.9364	4.4e-10
	rs7579651	rs1562308	2	61800279	0.875955	C	G	0.410433	0.996207	41.0249	1.5e-10	0.125203	0.0206765	36.6672	1.4e-09	38.5931	5.2e-10
	rs2084195	rs1562308	2	61756535	0.875934	G	T	0.399362	0.996813	40.9624	1.6e-10	0.125506	0.0207562	36.5621	1.5e-09	38.7747	4.8e-10
	rs2256615	rs1562308	2	61679894	0.875906	C	G	0.389229	0.998619	38.4306	5.7e-10	0.125896	0.0208366	36.5063	1.5e-09	38.7431	4.8e-10
	rs2442031	rs1562308	2	61613785	0.875874	C	G	0.610619	0.997554	38.7431	4.8e-10	-0.125988	0.0208408	36.545	1.5e-09	38.5285	5.4e-10
	rs7588814	rs1562308	2	61695589	0.875909	A	T	0.389286	0.996919	39.1813	3.9e-10	0.126038	0.0208541	36.5276	1.5e-09	38.7123	4.9e-10
	rs778752	rs1562308	2	61776902	0.875941	C	G	0.386766	0.998718	40.9627	1.6e-10	0.126098	0.0208601	36.5409	1.5e-09	38.4311	5.7e-10
	rs7808877	rs33951980	7	73027450	0.899732	C	G	0.716325	0.997783	29.9584	4.4e-08	0.136785	0.0226262	36.547	1.5e-09	37.0177	1.2e-09
	rs3094312	rs1562308	2	61804473	0.875956	T	C	0.410032	0.996414	40.295	2.2e-10	0.124683	0.0206767	36.3624	1.6e-09	38.2425	6.2e-10
	rs778142	rs1562308	2	61681428	0.875907	G	T	0.389144	0.998985	38.7094	4.9e-10	0.125787	0.0208325	36.4577	1.6e-09	38.5397	5.4e-10
	rs796597	rs1562308	2	61681060	0.875906	A	G	0.389	0.999025	38.6764	5e-10	0.125747	0.0208341	36.4285	1.6e-09	38.4888	5.5e-10
	rs10767892	rs2761589	11	31306248	0.484397	C	T	0.390821	0.996069	39.5086	3.3e-10	-0.126072	0.0209184	36.323	1.7e-09	37.0064	1.2e-09
	rs12540011	rs33951980	7	72991704	0.899675	G	A	0.71644	0.999505	29.4071	5.9e-08	0.136107	0.0226062	36.2496	1.7e-09	36.6902	1.4e-09
	rs13234131	rs33951980	7	73025975	0.899728	A	G	0.871718	0.999461	30.3451	3.6e-08	0.183372	0.0304564	36.2502	1.7e-09	36.9864	1.2e-09
	rs13234378	rs33951980	7	73026151	0.899729	A	T	0.871709	0.999492	30.461	3.4e-08	0.183467	0.0304546	36.2921	1.7e-09	37.0169	1.2e-09
	rs1541315	rs2761589	11	31800874	0.484836	G	T	0.358124	0.979827	37.2684	1e-09	0.129206	0.021455	36.2664	1.7e-09	37.9842	7.1e-10
	rs1929024	rs2761589	11	31304847	0.484397	C	T	0.391079	0.995648	39.3242	3.6e-10	-0.125979	0.0209156	36.2791	1.7e-09	37.004	1.2e-09
	rs2442029	rs1562308	2	61679552	0.875906	G	T	0.389204	0.998571	38.3768	5.8e-10	0.125489	0.0208374	36.268	1.7e-09	38.4337	5.7e-10
	rs2694636	rs1562308	2	61677137	0.875906	C	G	0.38917	0.998667	38.6621	5e-10	0.12557	0.0208357	36.3208	1.7e-09	38.521	5.4e-10
	rs2921718	rs1562308	2	61795267	0.875955	C	A	0.41315	0.996691	41.0443	1.5e-10	0.124421	0.0206535	36.2911	1.7e-09	38.2928	6.1e-10
	rs7116699	rs2761589	11	31283377	0.484364	T	C	0.390491	0.997919	39.2507	3.7e-10	-0.125893	0.0209057	36.2638	1.7e-09	36.9601	1.2e-09
	rs778141	rs1562308	2	61682178	0.875907	A	G	0.389016	0.999018	38.6677	5e-10	0.125555	0.0208338	36.3189	1.7e-09	38.4293	5.7e-10
	rs11887205	rs1562308	2	61774473	0.87594	T	G	0.386476	0.998938	40.569	1.9e-10	0.125446	0.0208612	36.1605	1.8e-09	38.1028	6.7e-10
	rs12056034	rs33951980	7	72878645	0.899612	A	G	0.875406	1	30.5572	3.2e-08	0.185731	0.0308554	36.2331	1.8e-09	37.082	1.1e-09
	rs1929023	rs2761589	11	31253853	0.484363	T	G	0.390531	0.998039	39.1382	3.9e-10	-0.125656	0.0209038	36.1341	1.8e-09	36.8293	1.3e-09
	rs1970028	rs2761589	11	31295440	0.484364	A	G	0.390827	0.997578	39.3966	3.5e-10	-0.125812	0.0209034	36.2255	1.8e-09	36.9456	1.2e-09
	rs2421207	rs1562308	2	61769405	0.875939	T	A	0.38683	0.99894	40.5708	1.9e-10	0.125491	0.0208571	36.2008	1.8e-09	38.1731	6.5e-10
	rs2592355	rs1562308	2	61803916	0.875956	T	C	0.410005	0.996204	40.0905	2.4e-10	0.124427	0.0206791	36.2049	1.8e-09	38.1061	6.7e-10
	rs2593625	rs1562308	2	61668769	0.875904	C	T	0.389322	0.999204	38.5597	5.3e-10	0.125283	0.0208284	36.1803	1.8e-09	38.3329	6e-10
	rs9309336	rs1562308	2	61763165	0.875937	T	C	0.389794	0.998984	39.9755	2.6e-10	0.125167	0.020822	36.1359	1.8e-09	37.9698	7.2e-10
	rs9638181	rs33951980	7	72999043	0.899685	A	G	0.716306	0.999147	29.1471	6.7e-08	0.135882	0.0226075	36.1263	1.8e-09	36.5616	1.5e-09
	rs10173974	rs1562308	2	61748900	0.875933	C	G	0.390161	0.998408	39.8471	2.7e-10	0.124986	0.0208228	36.0281	1.9e-09	37.8975	7.5e-10
	rs12612982	rs1562308	2	61747355	0.875933	G	A	0.390133	0.998467	39.8215	2.8e-10	0.125056	0.0208238	36.0652	1.9e-09	37.9322	7.3e-10
	rs12986713	rs1562308	2	61740646	0.875932	C	G	0.38961	0.997935	39.8613	2.7e-10	0.125081	0.0208339	36.0446	1.9e-09	37.9091	7.4e-10
	rs13246993	rs33951980	7	73022746	0.89972	G	A	0.871663	0.999197	30.2458	3.8e-08	0.182882	0.0304515	36.0682	1.9e-09	36.9581	1.2e-09
	rs1330717	rs2761589	11	31309813	0.484397	A	C	0.390967	0.996336	39.1261	4e-10	-0.12558	0.0209157	36.0492	1.9e-09	36.7384	1.4e-09
	rs13413337	rs1562308	2	61747123	0.875933	A	G	0.390232	0.998712	39.8029	2.8e-10	0.125039	0.0208217	36.0626	1.9e-09	37.9756	7.2e-10
	rs2121660	rs1562308	2	61653058	0.875894	T	C	0.610414	0.998326	38.192	6.4e-10	-0.125099	0.0208319	36.062	1.9e-09	38.2518	6.2e-10
	rs2441382	rs1562308	2	61811480	0.875957	T	C	0.410239	0.996151	39.9518	2.6e-10	0.124122	0.0206763	36.0372	1.9e-09	38.0052	7.1e-10
	rs2518932	rs1562308	2	61801277	0.875956	T	A	0.411023	0.995383	40.1888	2.3e-10	0.124203	0.0206802	36.0709	1.9e-09	38.0994	6.7e-10
	rs7125966	rs2761589	11	31799873	0.4848	G	C	0.35762	0.980189	36.9259	1.2e-09	0.128795	0.0214557	36.0342	1.9e-09	37.7061	8.2e-10
	rs7563678	rs1562308	2	61741811	0.875932	T	C	0.389842	0.998284	39.7359	2.9e-10	0.125155	0.0208295	36.1028	1.9e-09	38.0478	6.9e-10
	rs7606167	rs1562308	2	61742654	0.875932	C	G	0.38952	0.998023	39.9348	2.6e-10	0.125177	0.0208338	36.1002	1.9e-09	37.9654	7.2e-10
	rs12617911	rs1562308	2	61740825	0.875932	A	G	0.389764	0.998057	39.7325	2.9e-10	0.124942	0.0208313	35.9737	2e-09	37.8583	7.6e-10
	rs13023037	rs1562308	2	61620989	0.875878	C	T	0.610389	0.997337	38.5201	5.4e-10	-0.125014	0.0208393	35.9875	2e-09	38.0578	6.9e-10
	rs1992765	rs1562308	2	61751333	0.875933	A	G	0.398346	0.998285	40.6063	1.9e-10	0.124381	0.0207494	35.9334	2e-09	38.1825	6.4e-10
	rs2286276	rs33951980	7	72987354	0.899669	C	T	0.716547	1	29.0996	6.9e-08	0.135619	0.0226052	35.9933	2e-09	36.3963	1.6e-09
	rs3732170	rs1562308	2	61749716	0.875933	C	T	0.389964	0.998458	39.8509	2.7e-10	0.124839	0.020825	35.9363	2e-09	37.7838	7.9e-10
	rs3732171	rs1562308	2	61749690	0.875933	C	T	0.390191	0.998442	39.8058	2.8e-10	0.124953	0.0208227	36.0097	2e-09	37.8703	7.6e-10
	rs6545877	rs1562308	2	61741947	0.875932	T	C	0.389517	0.997995	39.7558	2.9e-10	0.124944	0.0208341	35.9651	2e-09	37.8235	7.7e-10
	rs66506038	rs33951980	7	72995943	0.899681	T	C	0.716315	0.999252	29.0563	7e-08	0.135645	0.0226073	36.0005	2e-09	36.4212	1.6e-09
	rs6748003	rs1562308	2	61806700	0.875957	T	G	0.410285	0.996356	39.9183	2.6e-10	0.123989	0.0206749	35.965	2e-09	37.8932	7.5e-10
	rs67644909	rs33951980	7	72995954	0.899681	C	T	0.716335	0.999209	29.0189	7.2e-08	0.135596	0.0226081	35.972	2e-09	36.3907	1.6e-09
	rs778154	rs1562308	2	61646631	0.875891	T	C	0.61068	0.99765	38.2612	6.2e-10	-0.124942	0.0208415	35.9386	2e-09	38.0365	6.9e-10
	rs778155	rs1562308	2	61647901	0.875891	A	G	0.610591	0.997844	38.2137	6.3e-10	-0.125057	0.020839	36.0131	2e-09	38.1144	6.7e-10
	rs778762	rs1562308	2	61782921	0.875942	G	T	0.396233	0.999201	40.6698	1.8e-10	0.124558	0.0207658	35.9788	2e-09	38.306	6e-10
	rs11678419	rs1562308	2	61743377	0.875932	C	T	0.389549	0.998069	39.5705	3.2e-10	0.124739	0.0208336	35.8492	2.1e-09	37.7111	8.2e-10
	rs1562309	rs1562308	2	61770126	0.875939	C	A	0.38695	0.999106	40.3073	2.2e-10	0.12494	0.0208544	35.8924	2.1e-09	37.8242	7.7e-10
	rs2256617	rs1562308	2	61679924	0.875906	A	G	0.389514	0.998584	37.9617	7.2e-10	0.124872	0.0208353	35.9195	2.1e-09	38.0864	6.8e-10
	rs2592356	rs1562308	2	61810428	0.875957	G	C	0.410441	0.99606	39.6645	3e-10	0.123851	0.0206755	35.8827	2.1e-09	37.9073	7.4e-10
	rs2593627	rs1562308	2	61618574	0.875877	T	C	0.610024	0.997774	38.2513	6.2e-10	-0.124791	0.0208321	35.8841	2.1e-09	37.9781	7.2e-10
	rs778758	rs1562308	2	61782161	0.875942	T	C	0.395858	0.999121	40.6927	1.8e-10	0.124339	0.0207714	35.833	2.1e-09	38.1484	6.6e-10
	rs14415	rs33951980	7	72984780	0.899666	T	C	0.716533	0.999567	28.9778	7.3e-08	0.135177	0.022608	35.7505	2.2e-09	36.1296	1.8e-09
	rs2592358	rs1562308	2	61813377	0.875958	A	G	0.41038	0.996309	39.6395	3.1e-10	0.123718	0.0206744	35.8096	2.2e-09	37.7349	8.1e-10
	rs34166762	rs33951980	7	73018524	0.899712	T	C	0.715515	0.99815	29.1577	6.7e-08	0.135275	0.0225996	35.8291	2.2e-09	36.4352	1.6e-09
	rs7560978	rs1562308	2	61619588	0.875877	G	A	0.610089	0.997563	38.1075	6.7e-10	-0.124696	0.0208338	35.8238	2.2e-09	37.908	7.4e-10
	rs7785479	rs33951980	7	73032835	0.899746	T	C	0.714996	0.996604	29.1539	6.7e-08	0.135066	0.0226052	35.7004	2.3e-09	36.2351	1.7e-09
	rs778763	rs1562308	2	61785639	0.875942	C	G	0.396039	0.998955	40.2282	2.3e-10	0.124107	0.0207701	35.704	2.3e-09	37.9485	7.3e-10
	rs7798357	rs33951980	7	73032265	0.899745	G	C	0.715012	0.996669	29.1313	6.8e-08	0.135018	0.0226049	35.6764	2.3e-09	36.2039	1.8e-09
	rs7800944	rs33951980	7	73035857	0.899752	T	C	0.714996	0.996319	29.2427	6.4e-08	0.135135	0.0226081	35.7279	2.3e-09	36.2391	1.7e-09
	rs12713439	rs1562308	2	61752154	0.875933	G	A	0.398288	0.998131	40.2377	2.2e-10	0.123839	0.0207514	35.6136	2.4e-09	37.8133	7.8e-10
	rs2074768	rs33951980	7	73030103	0.89974	A	C	0.714991	0.997054	29.0768	7e-08	0.13488	0.0226004	35.6176	2.4e-09	36.1565	1.8e-09
	rs762972	rs2761589	11	31797603	0.484755	A	G	0.356474	0.984921	36.1155	1.9e-09	0.127769	0.0214181	35.5867	2.4e-09	37.2595	1e-09
	rs2264100	rs1562308	2	61670829	0.875905	G	A	0.389149	0.999416	38.1064	6.7e-10	0.124221	0.0208284	35.5696	2.5e-09	37.6608	8.4e-10
	rs6545867	rs1562308	2	61651027	0.875893	C	T	0.610635	0.997868	37.8917	7.5e-10	-0.124275	0.020838	35.568	2.5e-09	37.8192	7.8e-10
	rs10190332	rs1562308	2	61619267	0.875877	T	G	0.610106	0.997658	37.8141	7.8e-10	-0.124086	0.0208342	35.4725	2.6e-09	37.5766	8.8e-10
	rs2427884	rs1562308	2	61775369	0.87594	G	A	0.395988	0.999521	40.3272	2.1e-10	0.123727	0.0207674	35.4946	2.6e-09	37.8251	7.7e-10
	rs34484204	rs1562308	2	61774854	0.87594	A	G	0.395995	0.999549	40.3306	2.1e-10	0.123653	0.0207675	35.4519	2.6e-09	37.7887	7.9e-10
	rs3771258	rs1562308	2	61764140	0.875938	C	T	0.386856	0.998158	39.8036	2.8e-10	0.124246	0.0208645	35.4606	2.6e-09	37.3021	1e-09
	rs3771260	rs1562308	2	61762384	0.875936	G	T	0.399031	0.999014	39.5535	3.2e-10	0.123553	0.0207372	35.4983	2.6e-09	37.6674	8.4e-10
	rs3771261	rs1562308	2	61762161	0.875935	A	G	0.399024	0.998964	39.5365	3.2e-10	0.123517	0.0207375	35.4765	2.6e-09	37.6435	8.5e-10
	rs7421663	rs1562308	2	61753786	0.875934	C	T	0.398459	0.998056	40.1629	2.3e-10	0.12357	0.0207512	35.4605	2.6e-09	37.6896	8.3e-10
	rs9989775	rs1562308	2	61761774	0.875935	A	G	0.398791	0.99888	39.6679	3e-10	0.123544	0.0207404	35.4822	2.6e-09	37.6403	8.5e-10
	rs9989864	rs1562308	2	61761637	0.875935	G	A	0.399022	0.998943	39.5286	3.2e-10	0.123498	0.0207377	35.4645	2.6e-09	37.629	8.6e-10
	rs12978499	rs838133	19	49237552	0.774748	A	C	0.58524	0.99752	27.3989	1.7e-07	0.123337	0.0207386	35.3693	2.7e-09	36.4641	1.6e-09
	rs12979144	rs838133	19	49237547	0.774748	G	A	0.585233	0.99752	27.4446	1.6e-07	0.123356	0.0207386	35.3804	2.7e-09	36.485	1.5e-09
	rs1900572	rs1562308	2	61650715	0.875893	T	G	0.610103	0.997868	37.4634	9.3e-10	-0.12392	0.0208331	35.3816	2.7e-09	37.5251	9e-10
	rs2441380	rs1562308	2	61775364	0.87594	T	C	0.395694	0.999178	40.3814	2.1e-10	0.123595	0.0207718	35.4038	2.7e-09	37.695	8.3e-10
	rs7561229	rs1562308	2	61737990	0.875931	A	T	0.389644	0.998047	39.1407	3.9e-10	0.123762	0.0208323	35.2941	2.8e-09	37.1351	1.1e-09
	rs10186325	rs1562308	2	61757721	0.875934	G	T	0.399196	0.99826	39.5369	3.2e-10	0.1232	0.0207427	35.2768	2.9e-09	37.4864	9.2e-10
	rs714052	rs33951980	7	72864869	0.899612	A	G	0.87613	1	29.7289	5e-08	0.183596	0.0309238	35.2487	2.9e-09	36.2922	1.7e-09
	rs11125885	rs1562308	2	61755728	0.875934	G	C	0.398882	0.998334	39.5352	3.2e-10	0.123019	0.0207456	35.1633	3e-09	37.3819	9.7e-10
	rs12539316	rs33951980	7	72977898	0.899656	A	G	0.718028	0.99835	27.9693	1.2e-07	0.134371	0.0226601	35.1631	3e-09	35.4886	2.6e-09
	rs12539351	rs33951980	7	72978112	0.899657	A	G	0.71803	0.998362	28.0273	1.2e-07	0.134393	0.0226599	35.1753	3e-09	35.4995	2.6e-09
	rs35732917	rs33951980	7	73013269	0.899704	T	C	0.715636	0.997522	28.8208	7.9e-08	0.134028	0.0226023	35.1629	3e-09	35.8286	2.2e-09
	rs6946689	rs33951980	7	72977637	0.899656	T	A	0.718012	0.998349	28.0903	1.2e-07	0.13446	0.0226591	35.2129	3e-09	35.525	2.5e-09
	rs838133	rs838133	19	49259529	0.775042	A	G	0.450871	0.938588	25.7577	3.9e-07	0.125365	0.0211325	35.1922	3e-09	35.4184	2.7e-09
	rs13225347	rs33951980	7	72976048	0.899654	C	T	0.718062	0.998251	28.0924	1.2e-07	0.134309	0.0226613	35.127	3.1e-09	35.4399	2.6e-09
	rs1562308	rs1562308	2	61768421	0.875939	A	C	0.396018	0.998966	39.996	2.5e-10	0.123051	0.0207715	35.0945	3.1e-09	37.3748	9.7e-10
	rs6545883	rs1562308	2	61772257	0.87594	A	G	0.395488	1	39.7722	2.9e-10	0.123053	0.0207696	35.1019	3.1e-09	37.5284	9e-10
	rs6707830	rs1562308	2	61749472	0.875933	G	A	0.399249	0.998787	39.4669	3.3e-10	0.122939	0.0207388	35.141	3.1e-09	37.3924	9.7e-10
	rs6742276	rs1562308	2	61768745	0.875939	G	A	0.3963	0.999091	39.8666	2.7e-10	0.123027	0.0207676	35.0933	3.1e-09	37.3999	9.6e-10
	rs7793710	rs33951980	7	72971531	0.899648	C	G	0.717932	0.997804	28.1729	1.1e-07	0.134261	0.0226623	35.099	3.1e-09	35.3596	2.7e-09
	rs13225333	rs33951980	7	72976018	0.899654	C	T	0.718019	0.998303	27.9907	1.2e-07	0.134226	0.0226598	35.0884	3.2e-09	35.392	2.7e-09
	rs2021807	rs2021807	11	30806998	0.483597	T	C	0.669226	0.97347	36.3731	1.6e-09	-0.129555	0.0218896	35.0292	3.2e-09	35.4303	2.6e-09
	rs7113110	rs2021807	11	30807171	0.483597	C	T	0.669233	0.973428	36.3483	1.7e-09	-0.129585	0.0218903	35.0432	3.2e-09	35.4269	2.6e-09
	rs2252662	rs1562308	2	61670731	0.875905	T	C	0.389616	1	37.0194	1.2e-09	0.123301	0.020839	35.009	3.3e-09	37.0644	1.1e-09
	rs12460295	rs838133	19	49247124	0.774767	T	G	0.572677	0.996934	27.5236	1.6e-07	0.121976	0.0206505	34.8886	3.5e-09	35.7866	2.2e-09
	rs12462324	rs838133	19	49247086	0.774767	A	G	0.572682	0.996985	27.5269	1.5e-07	0.12195	0.02065	34.8758	3.5e-09	35.775	2.2e-09
	rs35585307	rs1562308	2	61760141	0.875935	C	G	0.397941	0.99815	38.8971	4.5e-10	0.122462	0.0207572	34.8066	3.6e-09	37.0001	1.2e-09
	rs8102032	rs838133	19	49249795	0.774795	C	T	0.572474	0.992593	27.2059	1.8e-07	0.122083	0.0206902	34.8162	3.6e-09	35.7449	2.2e-09
	rs8104897	rs838133	19	49249814	0.774795	C	A	0.572464	0.992544	27.1841	1.8e-07	0.122005	0.0206906	34.7705	3.7e-09	35.6974	2.3e-09
	rs2240466	rs33951980	7	72856269	0.899612	G	A	0.876936	1	29.17	6.6e-08	0.182538	0.0309854	34.7051	3.8e-09	35.692	2.3e-09
	rs2307018	rs838133	19	49244219	0.774757	C	A	0.572221	0.999818	27.7115	1.4e-07	0.12154	0.0206223	34.7346	3.8e-09	35.6095	2.4e-09
	rs8105137	rs838133	19	49249888	0.774796	G	A	0.572476	0.992448	27.1113	1.9e-07	0.121875	0.0206914	34.6939	3.9e-09	35.6296	2.4e-09
	rs11083948	rs838133	19	49248120	0.774775	A	G	0.572621	0.995623	27.3369	1.7e-07	0.121543	0.0206623	34.6024	4e-09	35.4855	2.6e-09
	rs12611201	rs838133	19	49248255	0.774777	G	A	0.572621	0.995368	27.3656	1.7e-07	0.121625	0.0206645	34.6415	4e-09	35.5243	2.5e-09
	rs6545873	rs1562308	2	61733012	0.87593	T	C	0.39125	0.996707	38.6242	5.1e-10	0.12256	0.0208303	34.6181	4e-09	36.4359	1.6e-09
	rs8108136	rs838133	19	49247693	0.774771	C	T	0.572578	0.996288	27.3086	1.7e-07	0.121513	0.0206557	34.6072	4e-09	35.4736	2.6e-09
	rs8111208	rs838133	19	49248022	0.774774	A	C	0.572602	0.995758	27.3299	1.7e-07	0.121534	0.0206606	34.6028	4e-09	35.4739	2.6e-09
	rs8111288	rs838133	19	49247900	0.774773	G	A	0.572598	0.996009	27.3201	1.7e-07	0.121531	0.0206584	34.6082	4e-09	35.4805	2.6e-09
	rs11672046	rs838133	19	49247601	0.774771	C	T	0.57258	0.996419	27.2995	1.7e-07	0.12148	0.0206544	34.5924	4.1e-09	35.4654	2.6e-09
	rs12611203	rs838133	19	49248295	0.774777	G	A	0.572613	0.995269	27.3279	1.7e-07	0.12155	0.0206654	34.5955	4.1e-09	35.4819	2.6e-09
	rs35173225	rs33951980	7	73001021	0.899688	C	T	0.876797	0.999601	28.3242	1e-07	0.182181	0.0309755	34.5914	4.1e-09	35.635	2.4e-09
	rs8108468	rs838133	19	49247786	0.774772	G	A	0.572584	0.996175	27.2937	1.7e-07	0.121498	0.0206568	34.5948	4.1e-09	35.4621	2.6e-09
	rs8111399	rs838133	19	49247963	0.774774	G	T	0.572596	0.995868	27.2975	1.7e-07	0.121474	0.0206595	34.5723	4.1e-09	35.4467	2.6e-09
	rs911268	rs2021807	11	30809653	0.483654	T	C	0.669283	0.978755	35.7269	2.3e-09	-0.128357	0.0218326	34.5643	4.1e-09	34.9438	3.4e-09
	rs12611211	rs838133	19	49248331	0.774778	G	A	0.57265	0.995148	27.2653	1.8e-07	0.121467	0.0206665	34.545	4.2e-09	35.4185	2.7e-09
	rs12982115	rs838133	19	49248640	0.774781	A	G	0.572726	0.994675	26.9494	2.1e-07	0.121435	0.0206707	34.5126	4.2e-09	35.3891	2.7e-09
	rs2307019	rs838133	19	49244220	0.774757	G	A	0.572192	1	27.5923	1.5e-07	0.121214	0.0206223	34.5486	4.2e-09	35.3892	2.7e-09
	rs2694635	rs1562308	2	61676940	0.875906	C	T	0.391441	0.996561	37.0267	1.2e-09	0.122429	0.0208403	34.5112	4.2e-09	36.7257	1.4e-09
	rs766447	rs1562308	2	61735569	0.875931	C	T	0.398751	0.997808	38.8026	4.7e-10	0.121967	0.0207519	34.5436	4.2e-09	36.7305	1.4e-09
	rs2074755	rs33951980	7	72877166	0.899612	T	C	0.876867	0.999589	28.8426	7.9e-08	0.181926	0.0309839	34.4761	4.3e-09	35.4587	2.6e-09
	rs34763247	rs33951980	7	72866616	0.899612	A	T	0.876849	0.99986	28.9143	7.6e-08	0.181937	0.0309792	34.4905	4.3e-09	35.4588	2.6e-09
	rs35695283	rs33951980	7	72893403	0.899613	A	G	0.876869	0.999509	28.7763	8.1e-08	0.181804	0.0309853	34.4267	4.4e-09	35.4285	2.6e-09
	rs13244614	rs33951980	7	72973854	0.899651	C	A	0.717347	0.997542	27.3296	1.7e-07	0.132859	0.022649	34.4099	4.5e-09	34.5574	4.1e-09
	rs13246490	rs33951980	7	72992350	0.899676	C	T	0.876745	0.999392	28.2239	1.1e-07	0.181644	0.0309736	34.3923	4.5e-09	35.387	2.7e-09
	rs10779948	rs1562308	2	61844160	0.876013	T	C	0.392679	0.985604	35.2681	2.9e-09	0.122604	0.0209239	34.3339	4.6e-09	36.248	1.7e-09
	rs34482346	rs33951980	7	72915521	0.899614	G	C	0.876871	0.999819	28.614	8.8e-08	0.181546	0.0309804	34.3398	4.6e-09	35.3082	2.8e-09
	rs778148	rs1562308	2	61606866	0.875863	G	A	0.617484	0.997342	36.594	1.5e-09	-0.122442	0.0209093	34.2913	4.7e-09	35.943	2e-09
	rs28400015	rs838133	19	49250633	0.774805	G	A	0.572562	0.991336	26.6386	2.5e-07	0.121161	0.020702	34.2532	4.8e-09	35.1787	3e-09
	rs75229905	rs33951980	7	72895946	0.899613	T	C	0.876833	0.999891	28.5628	9.1e-08	0.181319	0.0309755	34.2647	4.8e-09	35.2432	2.9e-09
	rs13232120	rs33951980	7	72983310	0.899664	A	T	0.876813	0.99997	28.089	1.2e-07	0.18117	0.0309724	34.2155	4.9e-09	35.2226	2.9e-09
	rs7557230	rs1562308	2	61736652	0.875931	A	T	0.398479	0.997966	38.6812	5e-10	0.121444	0.0207525	34.246	4.9e-09	36.4216	1.6e-09
	rs12975033	rs838133	19	49249443	0.774791	A	T	0.571944	0.993328	26.8225	2.2e-07	0.120889	0.0206805	34.1702	5e-09	35.0419	3.2e-09
	rs13244268	rs33951980	7	72911843	0.899614	T	C	0.876854	0.999848	28.4633	9.5e-08	0.181166	0.0309778	34.2019	5e-09	35.1644	3e-09
	rs8061772	rs4788415	16	30119525	0.553308	C	A	0.142417	1	27.9827	1.2e-07	-0.170555	0.0291711	34.184	5e-09	37.4172	9.5e-10
	rs281408	rs838133	19	49233406	0.774742	C	A	0.585474	1	26.7259	2.3e-07	0.121103	0.0207193	34.1636	5.1e-09	35.1754	3e-09
	rs412712	rs838133	19	49234299	0.774743	A	T	0.585353	0.999429	26.7189	2.4e-07	0.120905	0.0207229	34.0398	5.4e-09	35.0767	3.2e-09
	rs79862839	rs33951980	7	72921609	0.899614	T	C	0.876829	0.999636	28.3614	1e-07	0.180694	0.0309778	34.0242	5.4e-09	34.9957	3.3e-09
	rs2694642	rs1562308	2	61596180	0.875858	A	G	0.617721	0.99728	36.3018	1.7e-09	-0.121878	0.0209135	33.9627	5.6e-09	35.5946	2.4e-09
	rs35332062	rs33951980	7	73012042	0.899703	G	A	0.872464	1	27.8035	1.3e-07	0.177989	0.0305311	33.9863	5.6e-09	35.1683	3e-09
	rs13231516	rs33951980	7	72863249	0.899612	T	G	0.876807	0.999786	28.5139	9.3e-08	0.180488	0.0309756	33.9512	5.7e-09	34.9191	3.4e-09
	rs2694644	rs1562308	2	61604856	0.875862	A	T	0.617679	0.997145	36.1851	1.8e-09	-0.121718	0.0209145	33.8697	5.9e-09	35.547	2.5e-09
	rs79624003	rs33951980	7	73012785	0.899704	A	G	0.871394	0.999638	28.0572	1.2e-07	0.177074	0.0304221	33.8788	5.9e-09	34.913	3.4e-09
	rs17145738	rs33951980	7	72982874	0.899663	C	T	0.877639	1	28.4014	9.9e-08	0.180714	0.0310605	33.8505	6e-09	34.8465	3.6e-09
	rs4672436	rs1562308	2	61603357	0.875861	A	C	0.617604	0.997395	36.0374	1.9e-09	-0.121609	0.0209109	33.821	6e-09	35.4806	2.6e-09
	rs778152	rs1562308	2	61608540	0.875863	C	A	0.617603	0.997295	36.0987	1.9e-09	-0.121492	0.0209111	33.7551	6.3e-09	35.4158	2.7e-09
	rs6718887	rs1562308	2	61727215	0.875929	G	A	0.400641	0.996707	38.1201	6.7e-10	0.120468	0.0207456	33.7203	6.4e-09	35.833	2.1e-09
	rs13240065	rs33951980	7	73015369	0.899707	G	A	0.87144	0.999134	27.9383	1.3e-07	0.176581	0.0304331	33.6662	6.5e-09	34.7135	3.8e-09
	rs2694643	rs1562308	2	61604383	0.875861	G	A	0.617718	0.997211	36.0979	1.9e-09	-0.12137	0.0209146	33.6761	6.5e-09	35.3929	2.7e-09
	rs12620105	rs1562308	2	61512321	0.875791	A	T	0.617618	0.99721	35.5444	2.5e-09	-0.12125	0.0209118	33.6187	6.7e-09	35.3452	2.8e-09
	rs6734830	rs1562308	2	61731112	0.87593	G	A	0.400455	0.996971	37.9952	7.1e-10	0.120285	0.0207451	33.6197	6.7e-09	35.798	2.2e-09
	rs9807965	rs1562308	2	61732159	0.87593	T	C	0.400449	0.996998	38.0092	7e-10	0.120273	0.020745	33.613	6.7e-09	35.797	2.2e-09
	rs13235543	rs33951980	7	73013901	0.899705	C	T	0.871297	0.999343	27.8511	1.3e-07	0.176185	0.0304136	33.5585	6.9e-09	34.6318	4e-09
	rs12473030	rs1562308	2	61720497	0.875922	T	A	0.400345	0.996468	37.9837	7.1e-10	0.120018	0.02075	33.4547	7.3e-09	35.4875	2.6e-09
	rs12612677	rs1562308	2	61729695	0.87593	A	C	0.400183	0.996351	37.8544	7.6e-10	0.120048	0.0207534	33.4607	7.3e-09	35.541	2.5e-09
	rs778158	rs1562308	2	61555421	0.87583	A	G	0.617097	0.998377	35.336	2.8e-09	-0.12085	0.0208947	33.4519	7.3e-09	35.0133	3.3e-09
	rs12713438	rs1562308	2	61725501	0.875927	G	A	0.400744	0.996798	37.6243	8.6e-10	0.119936	0.0207435	33.4303	7.4e-09	35.5029	2.5e-09
	rs13229619	rs33951980	7	73030175	0.89974	G	A	0.870922	0.997183	27.5355	1.5e-07	0.175728	0.0304008	33.4128	7.5e-09	34.2419	4.9e-09
	rs2177962	rs1562308	2	61588070	0.875855	T	A	0.617771	0.996981	35.5042	2.5e-09	-0.120846	0.0209173	33.3773	7.6e-09	34.9559	3.4e-09
	rs12713437	rs1562308	2	61722904	0.875925	C	T	0.400358	0.996589	37.7492	8e-10	0.119825	0.0207484	33.3522	7.7e-09	35.3554	2.7e-09
	rs2694639	rs1562308	2	61595291	0.875858	G	A	0.617815	0.996882	35.4711	2.6e-09	-0.120811	0.020918	33.3558	7.7e-09	35.0006	3.3e-09
	rs34062580	rs33951980	7	73033559	0.899747	G	A	0.870925	0.996311	27.4298	1.6e-07	0.175624	0.0304122	33.348	7.7e-09	34.1623	5.1e-09
	rs13233571	rs33951980	7	72971231	0.899647	C	T	0.877036	1	27.7901	1.4e-07	0.17895	0.0309995	33.3238	7.8e-09	34.3001	4.7e-09
	rs2694634	rs1562308	2	61551435	0.875828	T	C	0.617238	0.998234	35.1314	3.1e-09	-0.120651	0.0208972	33.3336	7.8e-09	34.8918	3.5e-09
	rs2305156	rs1562308	2	61729268	0.87593	T	C	0.40035	0.995003	37.7285	8.1e-10	0.119813	0.020766	33.289	7.9e-09	35.3784	2.7e-09
	rs2305155	rs1562308	2	61729258	0.87593	A	G	0.400678	0.994816	37.9589	7.2e-10	0.119774	0.0207649	33.2713	8e-09	35.4439	2.6e-09
	rs6545872	rs1562308	2	61724568	0.875926	G	A	0.400573	0.996437	37.3954	9.6e-10	0.119676	0.0207493	33.2667	8e-09	35.2955	2.8e-09
	rs4439488	rs2021807	11	30804996	0.483596	G	C	0.674981	0.976438	34.043	5.4e-09	-0.126624	0.0219571	33.2567	8.1e-09	33.4987	7.1e-09
	rs2463102	rs1562308	2	61571295	0.875849	G	C	0.617446	0.997731	35.1279	3.1e-09	-0.120496	0.0209062	33.2193	8.2e-09	34.8699	3.5e-09
	rs7572603	rs1562308	2	61552145	0.875829	C	G	0.617262	0.998301	35.0175	3.3e-09	-0.120436	0.0208972	33.2153	8.2e-09	34.8079	3.6e-09
	rs2022130	rs2761589	11	30819811	0.483661	T	C	0.675001	0.984842	33.5691	6.9e-09	-0.126029	0.0218742	33.1952	8.3e-09	33.4936	7.1e-09
	rs778143	rs1562308	2	61581890	0.875853	C	A	0.617868	0.997599	35.2203	2.9e-09	-0.120431	0.0209126	33.1637	8.5e-09	34.809	3.6e-09
	rs9677047	rs1562308	2	61585295	0.875854	C	G	0.617854	0.997397	35.2823	2.9e-09	-0.12034	0.0209144	33.1074	8.7e-09	34.7527	3.7e-09
	rs7930532	rs2021807	11	30811294	0.483654	G	A	0.675245	0.982104	33.5268	7e-09	-0.12579	0.0218998	32.9921	9.3e-09	33.2707	8e-09
	rs927224	rs2021807	11	30810665	0.483654	T	C	0.675491	0.981847	33.6675	6.5e-09	-0.125823	0.0219075	32.9862	9.3e-09	33.2489	8.1e-09
	rs13225450	rs33951980	7	72976123	0.899654	C	T	0.876917	0.999548	27.2336	1.8e-07	0.177914	0.0309908	32.9577	9.4e-09	33.9903	5.5e-09
	rs273589	rs2761589	11	30881109	0.483761	A	G	0.329117	0.989797	32.3926	1.3e-08	0.124888	0.0217537	32.9595	9.4e-09	33.2378	8.2e-09
	rs778157	rs1562308	2	61554289	0.87583	G	C	0.617508	0.998617	34.6893	3.9e-09	-0.119975	0.0208972	32.9611	9.4e-09	34.5787	4.1e-09
	rs111269058	rs33951980	7	72975702	0.899653	C	T	0.876916	0.999581	27.2143	1.8e-07	0.177849	0.0309904	32.9343	9.5e-09	33.9654	5.6e-09
	rs2694651	rs1562308	2	61588642	0.875855	T	C	0.617462	0.996937	35.0614	3.2e-09	-0.119965	0.0209125	32.9074	9.7e-09	34.4562	4.4e-09
	rs13004855	rs1562308	2	61505072	0.875783	C	T	0.617162	0.997017	35.4439	2.6e-09	-0.119825	0.0209096	32.8399	1e-08	34.2869	4.8e-09
	rs35194615	rs2761589	11	30813303	0.483654	C	T	0.675046	0.982547	33.2815	8e-09	-0.125315	0.0218964	32.7537	1e-08	33.0103	9.2e-09
	rs507969	rs2761589	11	30830612	0.483663	C	A	0.325104	0.985081	33.0959	8.8e-09	0.125271	0.0218707	32.8077	1e-08	33.1183	8.7e-09
	rs111837003	rs33951980	7	72907459	0.899613	C	T	0.876583	0.999134	27.2999	1.7e-07	0.177084	0.0309484	32.7403	1.1e-08	33.6053	6.8e-09
	rs2593633	rs1562308	2	61571513	0.875849	T	C	0.618006	0.997202	34.6191	4e-09	-0.119491	0.0209164	32.6357	1.1e-08	34.2586	4.8e-09
	rs35330527	rs33951980	7	72870207	0.899612	A	G	0.876527	0.998983	27.4084	1.6e-07	0.176722	0.0309471	32.6094	1.1e-08	33.4837	7.2e-09
	rs60982449	rs33951980	7	72873420	0.899612	A	G	0.876506	0.99904	27.3697	1.7e-07	0.176844	0.0309425	32.6641	1.1e-08	33.5449	7e-09
	rs6484504	rs2761589	11	31424823	0.484508	T	C	0.275755	0.992217	36.6775	1.4e-09	0.130518	0.0228447	32.6416	1.1e-08	34.5092	4.2e-09
	rs71556715	rs33951980	7	72881807	0.899612	C	T	0.876586	0.99881	27.3759	1.7e-07	0.177034	0.0309543	32.7091	1.1e-08	33.598	6.8e-09
	rs778144	rs1562308	2	61583128	0.875853	A	C	0.617742	0.997467	34.7776	3.7e-09	-0.119435	0.020911	32.6225	1.1e-08	34.2476	4.9e-09
	rs7797566	rs33951980	7	72896395	0.899613	A	C	0.876556	0.999104	27.2777	1.8e-07	0.176875	0.0309464	32.6672	1.1e-08	33.5362	7e-09
	rs1465042	rs1562308	2	61572322	0.875849	C	T	0.617735	0.997787	34.4664	4.3e-09	-0.119222	0.0209089	32.5123	1.2e-08	34.1189	5.2e-09
	rs2616803	rs2761589	11	31331693	0.484411	T	C	0.613769	0.995993	35.3803	2.7e-09	0.119377	0.0209655	32.4212	1.2e-08	32.8156	1e-08
	rs2761590	rs2761589	11	31330382	0.484411	G	T	0.613783	0.996013	35.3939	2.7e-09	0.119392	0.0209645	32.4327	1.2e-08	32.8338	1e-08
	rs33951980	rs33951980	7	73029437	0.899738	C	T	0.870146	0.99729	26.2406	3e-07	0.172898	0.0303294	32.4976	1.2e-08	33.3464	7.7e-09
	rs10128579	rs2761589	11	31335146	0.484412	T	G	0.613826	0.996148	35.3238	2.8e-09	0.119286	0.0209645	32.3747	1.3e-08	32.7753	1e-08
	rs13221253	rs33951980	7	72922233	0.899614	A	G	0.87653	0.998355	26.8754	2.2e-07	0.175807	0.0309482	32.2701	1.3e-08	33.1569	8.5e-09
	rs2184968	rs10457480	6	126760994	1.32699	T	C	0.545989	0.998024	25.0433	5.6e-07	-0.116327	0.0204729	32.2852	1.3e-08	33.9551	5.6e-09
	rs2616809	rs2761589	11	31329938	0.484411	A	G	0.613816	0.996143	35.3105	2.8e-09	0.119273	0.0209645	32.3679	1.3e-08	32.7628	1e-08
	rs2616821	rs2761589	11	31326420	0.484411	T	C	0.613722	0.996138	35.4732	2.6e-09	0.119241	0.0209642	32.3512	1.3e-08	32.7128	1.1e-08
	rs2761592	rs2761589	11	31327766	0.484411	G	A	0.613719	0.996155	35.4611	2.6e-09	0.119271	0.020964	32.3683	1.3e-08	32.7174	1.1e-08
	rs686901	rs2761589	11	30854334	0.483743	G	C	0.326476	0.993349	31.8544	1.7e-08	0.123657	0.0217575	32.3012	1.3e-08	32.5428	1.2e-08
	rs10496092	rs1562308	2	61524679	0.875811	C	T	0.617438	0.997793	34.0809	5.3e-09	-0.118661	0.0209046	32.2206	1.4e-08	33.8656	5.9e-09
	rs273552	rs2761589	11	30872241	0.483754	C	T	0.326745	0.994441	31.6514	1.8e-08	0.12337	0.0217379	32.2096	1.4e-08	32.4759	1.2e-08
	rs273555	rs2761589	11	30866864	0.483748	T	C	0.32673	0.99378	31.5895	1.9e-08	0.12328	0.0217446	32.1426	1.4e-08	32.4019	1.3e-08
	rs273556	rs2761589	11	30866279	0.483747	C	A	0.326738	0.993786	31.6269	1.9e-08	0.123338	0.0217444	32.1733	1.4e-08	32.428	1.2e-08
	rs4672425	rs1562308	2	61444998	0.875712	G	C	0.616435	0.997452	34.3074	4.7e-09	-0.118578	0.0208986	32.1938	1.4e-08	33.6771	6.5e-09
	rs535845	rs2761589	11	30839228	0.483682	C	A	0.325639	0.987419	32.4561	1.2e-08	0.123998	0.0218388	32.2386	1.4e-08	32.5109	1.2e-08
	rs604672	rs2761589	11	30853226	0.483742	C	G	0.326739	0.993397	31.6742	1.8e-08	0.123371	0.0217488	32.1779	1.4e-08	32.4339	1.2e-08
	rs6749226	rs1562308	2	61509783	0.875789	G	A	0.617961	0.997572	34.4667	4.3e-09	-0.118622	0.0209123	32.1756	1.4e-08	33.8236	6e-09
	rs113026	rs2761589	11	30846842	0.483689	G	A	0.325873	0.987871	32.0104	1.5e-08	0.123445	0.0218247	31.9928	1.5e-08	32.2207	1.4e-08
	rs273587	rs2761589	11	30883876	0.483762	A	T	0.319716	0.988072	31.1184	2.4e-08	0.12413	0.0219356	32.0224	1.5e-08	32.3536	1.3e-08
	rs546181	rs2761589	11	30855237	0.483743	G	T	0.326828	0.993722	31.6126	1.9e-08	0.123015	0.0217453	32.0026	1.5e-08	32.2576	1.4e-08
	rs8106205	rs838133	19	49250197	0.774799	T	C	0.556568	0.992027	23.3509	1.3e-06	0.116779	0.0206073	32.1136	1.5e-08	32.4389	1.2e-08
	rs10767877	rs2761589	11	30860580	0.483744	A	G	0.328044	0.991706	31.4355	2.1e-08	0.12272	0.0217356	31.8777	1.6e-08	32.2858	1.3e-08
	rs11667321	rs838133	19	49250538	0.774803	A	G	0.556506	0.991592	23.1736	1.5e-06	0.116414	0.0206113	31.9008	1.6e-08	32.223	1.4e-08
	rs1823307	rs2761589	11	30859628	0.483743	G	C	0.327569	0.992306	31.3617	2.1e-08	0.122735	0.0217381	31.8781	1.6e-08	32.2222	1.4e-08
	rs532202	rs2761589	11	30839635	0.483684	C	T	0.325741	0.987938	32.04	1.5e-08	0.12345	0.0218306	31.978	1.6e-08	32.2317	1.4e-08
	rs80189144	rs33951980	7	72939939	0.899616	T	C	0.876872	0.997764	26.3834	2.8e-07	0.175272	0.0309981	31.9708	1.6e-08	32.77	1e-08
	rs1015541	rs2761589	11	30854905	0.483743	T	G	0.327666	0.991637	31.1751	2.4e-08	0.122527	0.0217425	31.7575	1.7e-08	32.0684	1.5e-08
	rs273550	rs2761589	11	30873650	0.483755	C	T	0.327211	0.992908	31.3214	2.2e-08	0.122614	0.0217349	31.8245	1.7e-08	32.1897	1.4e-08
	rs273551	rs2761589	11	30872579	0.483754	C	A	0.3272	0.992821	31.3365	2.2e-08	0.122647	0.0217362	31.8382	1.7e-08	32.2018	1.4e-08
	rs273617	rs2761589	11	30895612	0.483775	T	C	0.327736	0.996529	30.789	2.9e-08	0.122305	0.0216989	31.7699	1.7e-08	31.9809	1.6e-08
	rs612171	rs2761589	11	30893425	0.483774	G	A	0.327817	0.99676	30.7654	2.9e-08	0.122275	0.0216966	31.7609	1.7e-08	31.9499	1.6e-08
	rs71556736	rs33951980	7	73034929	0.89975	C	T	0.869791	0.995905	25.5767	4.3e-07	0.170834	0.0303065	31.7744	1.7e-08	32.6194	1.1e-08
	rs808471	rs2761589	11	30861472	0.483745	C	G	0.327477	0.992081	31.3258	2.2e-08	0.122604	0.0217374	31.812	1.7e-08	32.1157	1.5e-08
	rs10128753	rs2761589	11	31335424	0.484412	C	A	0.614321	0.996301	34.8566	3.5e-09	0.11799	0.0209696	31.6597	1.8e-08	31.9986	1.5e-08
	rs1375378	rs2761589	11	30859389	0.483743	T	C	0.327758	0.9917	31.1985	2.3e-08	0.122376	0.0217395	31.6882	1.8e-08	32.0101	1.5e-08
	rs1823306	rs2761589	11	30859760	0.483743	A	G	0.327748	0.991673	31.1809	2.4e-08	0.122352	0.0217399	31.6744	1.8e-08	32.0008	1.5e-08
	rs2122135	rs2761589	11	30860112	0.483743	C	T	0.327763	0.99168	31.2107	2.3e-08	0.122403	0.0217396	31.7015	1.8e-08	32.0224	1.5e-08
	rs273592	rs2761589	11	30878849	0.483761	C	T	0.328761	0.995424	30.8772	2.7e-08	0.122139	0.0217031	31.6716	1.8e-08	32.1277	1.4e-08
	rs273594	rs2761589	11	30876113	0.48376	G	C	0.328701	0.995699	30.9595	2.6e-08	0.122271	0.0217021	31.7429	1.8e-08	32.2339	1.4e-08
	rs273601	rs2761589	11	30933646	0.483827	C	T	0.328727	0.994092	30.4515	3.4e-08	0.122262	0.0217016	31.7394	1.8e-08	32.1189	1.5e-08
	rs273615	rs2761589	11	30899836	0.483777	A	C	0.327775	0.997144	30.8014	2.9e-08	0.122211	0.0216932	31.7379	1.8e-08	31.9103	1.6e-08
	rs273616	rs2761589	11	30896283	0.483775	C	T	0.327824	0.996767	30.7195	3e-08	0.122108	0.0216962	31.6751	1.8e-08	31.8442	1.7e-08
	rs7127215	rs2761589	11	30858131	0.483743	A	G	0.327751	0.991724	31.2183	2.3e-08	0.122407	0.0217393	31.7048	1.8e-08	32.0279	1.5e-08
	rs7602859	rs1562308	2	61458206	0.87572	A	T	0.617123	0.998033	33.8063	6.1e-09	-0.117712	0.0209025	31.7135	1.8e-08	33.0515	9e-09
	rs1028643	rs2761589	11	30861880	0.483745	G	A	0.328277	0.993506	31.0901	2.5e-08	0.122163	0.021727	31.6139	1.9e-08	32.0217	1.5e-08
	rs1844594	rs10457480	6	126788107	1.32699	G	A	0.544407	0.998384	24.1325	9e-07	-0.114975	0.0204604	31.5777	1.9e-08	33.2295	8.2e-09
	rs2021806	rs2761589	11	30853618	0.483743	A	G	0.327789	0.991617	31.1229	2.4e-08	0.122139	0.0217399	31.5643	1.9e-08	31.8833	1.6e-08
	rs2312068	rs2761589	11	30855691	0.483743	G	A	0.327765	0.991705	31.1927	2.3e-08	0.122146	0.0217393	31.5697	1.9e-08	31.9211	1.6e-08
	rs273558	rs2761589	11	30864319	0.483746	G	A	0.328249	0.993815	31.1121	2.4e-08	0.122144	0.0217243	31.612	1.9e-08	32.0243	1.5e-08
	rs273593	rs2761589	11	30878012	0.483761	T	C	0.328757	0.995488	30.8391	2.8e-08	0.122081	0.0217025	31.6432	1.9e-08	32.099	1.5e-08
	rs56066508	rs838133	19	49241400	0.774753	C	T	0.570386	0.998175	24.2778	8.3e-07	0.115962	0.0206236	31.6159	1.9e-08	32.2374	1.4e-08
	rs273597	rs2761589	11	30875093	0.483756	T	C	0.327762	0.994569	30.959	2.6e-08	0.121851	0.021721	31.4702	2e-08	31.9111	1.6e-08
	rs28400014	rs838133	19	49250657	0.774805	C	G	0.55604	0.991007	22.764	1.8e-06	0.115618	0.0206121	31.4633	2e-08	31.8786	1.6e-08
	rs172073	rs2761589	11	30934274	0.483828	T	C	0.328381	0.994297	29.9051	4.5e-08	0.121589	0.0217099	31.3671	2.1e-08	31.6999	1.8e-08
	rs273554	rs2761589	11	30868366	0.483749	G	A	0.327945	0.993108	30.9714	2.6e-08	0.121796	0.0217295	31.4169	2.1e-08	31.8131	1.7e-08
	rs273557	rs2761589	11	30864854	0.483747	A	G	0.328446	0.993696	30.9053	2.7e-08	0.121658	0.0217242	31.361	2.1e-08	31.7491	1.8e-08
	rs273612	rs2761589	11	30903063	0.483781	G	A	0.326959	0.99738	30.2727	3.8e-08	0.121589	0.021704	31.3843	2.1e-08	31.5874	1.9e-08
	rs4671399	rs1562308	2	61458518	0.875721	C	T	0.617232	0.997991	33.4089	7.5e-09	-0.117151	0.0209039	31.4078	2.1e-08	32.6622	1.1e-08
	rs9321065	rs10457480	6	126744087	1.32695	G	A	0.543897	0.998541	24.0207	9.5e-07	-0.11464	0.020463	31.3857	2.1e-08	32.9813	9.3e-09
	rs9388495	rs10457480	6	126782457	1.32699	G	A	0.544314	0.998279	23.9638	9.8e-07	-0.11472	0.0204614	31.4347	2.1e-08	33.089	8.8e-09
	rs1361109	rs10457480	6	126771143	1.32699	C	T	0.544291	0.998422	23.927	1e-06	-0.114455	0.0204596	31.2948	2.2e-08	32.9802	9.3e-09
	rs1572569	rs10457480	6	126771687	1.32699	G	A	0.544482	0.998436	24.0148	9.6e-07	-0.114546	0.0204598	31.3442	2.2e-08	33.0143	9.1e-09
	rs1838978	rs1562308	2	61540923	0.875822	T	C	0.608267	0.996568	35.0436	3.2e-09	-0.116499	0.020822	31.3038	2.2e-08	32.9292	9.6e-09
	rs273553	rs2761589	11	30871743	0.483753	T	C	0.327161	0.992551	30.7016	3e-08	0.121613	0.0217398	31.2932	2.2e-08	31.6138	1.9e-08
	rs273563	rs2761589	11	30919884	0.483811	G	A	0.328152	0.994687	30.0908	4.1e-08	0.121373	0.0217001	31.284	2.2e-08	31.645	1.9e-08
	rs4672426	rs1562308	2	61457148	0.87572	G	A	0.617059	0.998052	33.56	6.9e-09	-0.116998	0.0209011	31.3344	2.2e-08	32.5835	1.1e-08
	rs12615783	rs1562308	2	61440947	0.875709	T	C	0.615565	0.997434	33.112	8.7e-09	-0.116725	0.0208889	31.2247	2.3e-08	32.4956	1.2e-08
	rs2039735	rs10457480	6	126745076	1.32695	T	C	0.543872	0.998703	23.9022	1e-06	-0.114334	0.0204624	31.2202	2.3e-08	32.8043	1e-08
	rs273565	rs2761589	11	30918425	0.48381	G	A	0.327482	0.995477	30.0682	4.2e-08	0.121313	0.0217131	31.2154	2.3e-08	31.4701	2e-08
	rs273582	rs2761589	11	30890857	0.483773	C	T	0.32981	0.994873	29.7397	4.9e-08	0.121108	0.0216821	31.1989	2.3e-08	31.4098	2.1e-08
	rs273618	rs2761589	11	30894383	0.483775	A	G	0.328949	0.998263	30.2812	3.7e-08	0.121071	0.0216735	31.205	2.3e-08	31.5847	1.9e-08
	rs273564	rs2761589	11	30918860	0.48381	A	G	0.327529	0.995624	30.0037	4.3e-08	0.121201	0.0217109	31.1643	2.4e-08	31.399	2.1e-08
	rs273569	rs2761589	11	30914035	0.483795	G	A	0.327288	0.997013	30.0513	4.2e-08	0.121089	0.0217006	31.1361	2.4e-08	31.3782	2.1e-08
	rs273571	rs2761589	11	30911936	0.483793	C	G	0.327333	0.997434	30.0668	4.2e-08	0.121067	0.0216968	31.136	2.4e-08	31.357	2.1e-08
	rs273572	rs2761589	11	30911742	0.483792	C	T	0.32735	0.997443	30.1327	4e-08	0.121106	0.0216965	31.1566	2.4e-08	31.3702	2.1e-08
	rs273573	rs2761589	11	30910991	0.483791	A	C	0.327325	0.997535	30.067	4.2e-08	0.121073	0.0216958	31.1418	2.4e-08	31.363	2.1e-08
	rs273576	rs2761589	11	30910036	0.48379	A	G	0.327273	0.997376	30.0968	4.1e-08	0.121155	0.0216971	31.1804	2.4e-08	31.4168	2.1e-08
	rs273579	rs2761589	11	30908049	0.483788	T	C	0.327322	0.997786	30.1009	4.1e-08	0.121123	0.0216933	31.1747	2.4e-08	31.3925	2.1e-08
	rs4672423	rs1562308	2	61435275	0.875703	C	T	0.616778	0.998294	32.737	1.1e-08	-0.116661	0.020894	31.175	2.4e-08	32.4015	1.3e-08
	rs163883	rs2761589	11	30947248	0.483843	A	G	0.328202	0.993587	29.3054	6.2e-08	0.120996	0.021723	31.0243	2.5e-08	31.3005	2.2e-08
	rs163885	rs2761589	11	30945365	0.483841	C	T	0.328284	0.99343	29.3787	6e-08	0.120981	0.021719	31.0282	2.5e-08	31.3353	2.2e-08
	rs17145732	rs33951980	7	72970268	0.899646	T	G	0.712998	0.99026	24.113	9.1e-07	0.126064	0.0226305	31.0308	2.5e-08	30.7766	2.9e-08
	rs273562	rs2761589	11	30920430	0.483812	A	T	0.328292	0.99444	29.8749	4.6e-08	0.120939	0.0217003	31.0599	2.5e-08	31.4036	2.1e-08
	rs273608	rs2761589	11	30941272	0.483836	C	A	0.328217	0.994382	29.4357	5.8e-08	0.121013	0.0217111	31.0672	2.5e-08	31.4171	2.1e-08
	rs4897181	rs10457480	6	126753564	1.32696	C	T	0.54399	0.99883	23.7792	1.1e-06	-0.113969	0.0204612	31.0252	2.5e-08	32.6325	1.1e-08
	rs163882	rs2761589	11	30947681	0.483843	C	G	0.328213	0.993507	29.2849	6.2e-08	0.120963	0.0217236	31.0058	2.6e-08	31.2744	2.2e-08
	rs163886	rs2761589	11	30943561	0.483838	T	A	0.328475	0.99318	29.18	6.6e-08	0.120882	0.0217146	30.9899	2.6e-08	31.3401	2.2e-08
	rs175398	rs2761589	11	30930393	0.483823	T	G	0.328095	0.993581	29.7111	5e-08	0.120809	0.0217137	30.9547	2.6e-08	31.293	2.2e-08
	rs273559	rs2761589	11	30923223	0.483815	C	T	0.327513	0.99526	29.847	4.7e-08	0.120927	0.0217138	31.0151	2.6e-08	31.2663	2.2e-08
	rs273560	rs2761589	11	30922081	0.483814	C	T	0.328277	0.994438	29.8231	4.7e-08	0.120834	0.0217001	31.0067	2.6e-08	31.3433	2.2e-08
	rs777589	rs1562308	2	61425621	0.875693	T	C	0.38287	1	33.1708	8.4e-09	0.116293	0.0208906	30.989	2.6e-08	32.2191	1.4e-08
	rs9398805	rs10457480	6	126726295	1.32694	C	T	0.543701	0.999158	23.5001	1.2e-06	-0.113862	0.0204584	30.975	2.6e-08	32.4686	1.2e-08
	rs9401881	rs10457480	6	126751921	1.32696	C	T	0.544257	0.998786	23.5635	1.2e-06	-0.113859	0.0204639	30.9572	2.6e-08	32.5097	1.2e-08
	rs12997538	rs1562308	2	61564249	0.875846	A	C	0.608587	0.997628	34.654	3.9e-09	-0.115806	0.0208175	30.9459	2.7e-08	32.6055	1.1e-08
	rs1558901	rs11642015	16	53803187	0.645988	A	T	0.576376	0.999522	31.0697	2.5e-08	0.115055	0.0206942	30.9109	2.7e-08	31.8602	1.7e-08
	rs1578060	rs10457480	6	126712247	1.32693	G	C	0.544277	0.999147	23.8335	1.1e-06	-0.113808	0.020461	30.9378	2.7e-08	32.3909	1.3e-08
	rs175399	rs2761589	11	30930374	0.483823	A	C	0.328074	0.993497	29.6926	5.1e-08	0.120781	0.0217149	30.9372	2.7e-08	31.2697	2.2e-08
	rs395032	rs2761589	11	30927200	0.48382	T	C	0.327624	0.995246	29.7671	4.9e-08	0.120791	0.0217133	30.9469	2.7e-08	31.1849	2.3e-08
	rs6545848	rs1562308	2	61461183	0.875722	G	T	0.616045	0.998206	32.7898	1e-08	-0.116071	0.0208879	30.8784	2.7e-08	32.295	1.3e-08
	rs6739427	rs1562308	2	61452879	0.875717	T	C	0.617374	0.997231	33.9571	5.6e-09	-0.116271	0.0209132	30.9101	2.7e-08	32.0916	1.5e-08
	rs9375442	rs10457480	6	126803137	1.32699	A	C	0.544265	0.998212	23.4607	1.3e-06	-0.113787	0.0204619	30.9237	2.7e-08	32.5333	1.2e-08
	rs9388494	rs10457480	6	126776094	1.32699	G	T	0.544774	0.999183	23.5774	1.2e-06	-0.113629	0.0204602	30.8429	2.8e-08	32.5384	1.2e-08
	rs11075985	rs11642015	16	53805207	0.645995	C	A	0.575381	0.999411	31.0294	2.5e-08	0.114761	0.0206886	30.7702	2.9e-08	31.6458	1.9e-08
	rs1337735	rs10457480	6	126771024	1.32699	T	A	0.544717	0.999352	23.373	1.3e-06	-0.113467	0.0204596	30.757	2.9e-08	32.4395	1.2e-08
	rs163881	rs2761589	11	30948244	0.483844	T	G	0.328692	0.992823	29.0828	6.9e-08	0.120501	0.0217176	30.7864	2.9e-08	31.0965	2.5e-08
	rs2184967	rs10457480	6	126773487	1.32699	C	T	0.544957	0.999138	23.4129	1.3e-06	-0.113468	0.0204625	30.7491	2.9e-08	32.4166	1.2e-08
	rs273603	rs2761589	11	30931904	0.483825	C	T	0.328517	0.994336	29.6378	5.2e-08	0.120443	0.0217019	30.8016	2.9e-08	31.1753	2.4e-08
	rs273614	rs2761589	11	30901982	0.483779	A	G	0.328371	0.999467	29.8585	4.6e-08	0.120228	0.02167	30.7821	2.9e-08	31.1879	2.3e-08
	rs4559102	rs10457480	6	126773580	1.32699	G	A	0.544773	0.999111	23.4887	1.3e-06	-0.113525	0.0204616	30.7825	2.9e-08	32.4858	1.2e-08
	rs4897179	rs10457480	6	126727930	1.32694	G	A	0.543893	0.998289	23.372	1.3e-06	-0.113553	0.0204664	30.7833	2.9e-08	32.3265	1.3e-08
	rs9398810	rs10457480	6	126815604	1.32699	C	A	0.544585	0.999534	23.4629	1.3e-06	-0.113451	0.0204579	30.7536	2.9e-08	32.2697	1.3e-08
	rs1121980	rs11642015	16	53809247	0.646003	G	A	0.576081	1	31.1102	2.4e-08	0.114643	0.020688	30.7086	3e-08	31.6288	1.9e-08
	rs1538170	rs10457480	6	126752874	1.32696	C	T	0.544124	0.998947	23.4931	1.3e-06	-0.113434	0.0204623	30.731	3e-08	32.3028	1.3e-08
	rs1538171	rs10457480	6	126752884	1.32696	C	G	0.544124	0.998947	23.4931	1.3e-06	-0.113434	0.0204623	30.731	3e-08	32.3028	1.3e-08
	rs1538172	rs10457480	6	126748493	1.32695	A	G	0.543946	0.99856	23.2401	1.4e-06	-0.113403	0.0204665	30.7015	3e-08	32.2567	1.4e-08
	rs4565329	rs10457480	6	126752798	1.32696	C	T	0.544123	0.998951	23.492	1.3e-06	-0.113434	0.0204623	30.731	3e-08	32.3029	1.3e-08
	rs4897180	rs10457480	6	126727950	1.32694	A	T	0.544363	0.997822	23.2247	1.4e-06	-0.113419	0.0204743	30.6871	3e-08	32.1581	1.4e-08
	rs9372839	rs10457480	6	126809870	1.32699	G	A	0.545167	0.999393	23.2164	1.4e-06	-0.113416	0.0204611	30.7251	3e-08	32.2537	1.4e-08
	rs9388496	rs10457480	6	126785062	1.32699	A	G	0.544579	0.999246	23.3567	1.3e-06	-0.113405	0.0204603	30.7215	3e-08	32.41	1.2e-08
	rs9375441	rs10457480	6	126778600	1.32699	G	A	0.544766	0.999213	23.2113	1.5e-06	-0.113226	0.0204612	30.6214	3.1e-08	32.3126	1.3e-08
	rs2152876	rs10457480	6	126761228	1.32699	G	A	0.543819	0.999814	23.4684	1.3e-06	-0.113108	0.020453	30.5821	3.2e-08	32.2071	1.4e-08
	rs273613	rs2761589	11	30902893	0.483781	T	C	0.32848	1	29.551	5.4e-08	0.119755	0.0216629	30.5599	3.2e-08	30.9782	2.6e-08
	rs9923544	rs11642015	16	53801985	0.645971	C	T	0.576399	0.999786	30.8855	2.7e-08	0.114479	0.0206934	30.6046	3.2e-08	31.5658	1.9e-08
	rs2050644	rs10457480	6	126805255	1.32699	A	G	0.544854	0.999189	23.0132	1.6e-06	-0.113095	0.0204622	30.5479	3.3e-08	32.161	1.4e-08
	rs1120786	rs10457480	6	126808637	1.32699	T	G	0.544902	0.999228	22.895	1.7e-06	-0.112891	0.0204622	30.4376	3.4e-08	32.0283	1.5e-08
	rs1361107	rs10457480	6	126767511	1.32699	A	C	0.544033	0.99923	23.3775	1.3e-06	-0.112871	0.0204574	30.4411	3.4e-08	32.1197	1.4e-08
	rs2600663	rs1562308	2	61540687	0.875822	A	G	0.60805	0.996692	34.1869	5e-09	-0.114931	0.0208181	30.4785	3.4e-08	32.048	1.5e-08
	rs273567	rs2761589	11	30917214	0.483801	C	T	0.329529	0.997376	29.7542	4.9e-08	0.119597	0.0216694	30.461	3.4e-08	30.9283	2.7e-08
	rs9385399	rs10457480	6	126759033	1.32699	G	T	0.543891	0.999732	23.2386	1.4e-06	-0.112939	0.0204524	30.4929	3.4e-08	32.1702	1.4e-08
	rs9385401	rs10457480	6	126789472	1.32699	C	T	0.544693	0.999347	23.0258	1.6e-06	-0.112963	0.0204606	30.4814	3.4e-08	32.1264	1.4e-08
	rs9398809	rs10457480	6	126789144	1.32699	C	T	0.544691	0.999335	23.0313	1.6e-06	-0.112977	0.0204606	30.4889	3.4e-08	32.1335	1.4e-08
	rs1361108	rs10457480	6	126767600	1.32699	C	T	0.544143	1	23.3988	1.3e-06	-0.112822	0.0204512	30.4333	3.5e-08	32.1508	1.4e-08
	rs1415671	rs10457480	6	126759587	1.32699	T	G	0.543832	0.999847	23.1823	1.5e-06	-0.112813	0.0204519	30.4262	3.5e-08	32.1147	1.5e-08
	rs1602278	rs10457480	6	126838605	1.32699	A	C	0.544227	0.99852	22.7743	1.8e-06	-0.112774	0.0204586	30.3856	3.5e-08	31.8925	1.6e-08
	rs34060476	rs33951980	7	73037956	0.899759	A	G	0.866467	0.995463	24.3921	7.9e-07	0.165374	0.0300009	30.3855	3.5e-08	30.8222	2.8e-08
	rs4422634	rs10457480	6	126806676	1.32699	T	C	0.544987	0.999283	22.8586	1.7e-06	-0.112821	0.0204609	30.4039	3.5e-08	31.9451	1.6e-08
	rs4895808	rs10457480	6	126781434	1.32699	C	T	0.544717	0.999301	22.956	1.7e-06	-0.112824	0.0204602	30.4078	3.5e-08	32.0524	1.5e-08
	rs9375439	rs10457480	6	126758540	1.32699	C	G	0.543992	0.999807	23.09	1.5e-06	-0.112802	0.0204537	30.4152	3.5e-08	32.0552	1.5e-08
	rs9398808	rs10457480	6	126758791	1.32699	G	T	0.544063	0.999852	23.1633	1.5e-06	-0.112827	0.0204531	30.4303	3.5e-08	32.0784	1.5e-08
	rs273610	rs2761589	11	30938218	0.483832	G	A	0.329074	0.994102	28.7903	8.1e-08	0.11952	0.0216988	30.3396	3.6e-08	30.7655	2.9e-08
	rs4232893	rs4788415	16	30423751	0.553769	G	A	0.156228	1	29.4194	5.8e-08	-0.154782	0.0280818	30.3802	3.6e-08	33.0407	9e-09
	rs2177961	rs1562308	2	61560264	0.875844	T	C	0.608297	0.997828	34.0665	5.3e-09	-0.114556	0.0208122	30.2972	3.7e-08	31.8982	1.6e-08
	rs4897182	rs10457480	6	126755642	1.32696	T	G	0.543767	0.9988	23.0293	1.6e-06	-0.112672	0.0204613	30.3226	3.7e-08	31.9435	1.6e-08
	rs9385400	rs10457480	6	126764190	1.32699	T	G	0.544006	0.999796	23.0256	1.6e-06	-0.112627	0.0204536	30.3209	3.7e-08	31.9595	1.6e-08
	rs4433823	rs4788415	16	30433730	0.553851	A	G	0.12997	0.972127	27.0609	2e-07	-0.168883	0.0307048	30.2526	3.8e-08	33.4442	7.3e-09
	rs9401883	rs10457480	6	126797111	1.32699	A	G	0.544649	0.999151	22.782	1.8e-06	-0.11253	0.020461	30.2471	3.8e-08	31.8825	1.6e-08
	rs11604176	rs2761589	11	31293663	0.484364	C	T	0.713725	0.997048	34.9948	3.3e-09	-0.123869	0.022544	30.19	3.9e-08	31.7522	1.8e-08
	rs1421086	rs11642015	16	53801343	0.645971	C	A	0.576587	0.999895	30.5789	3.2e-08	0.11371	0.0206929	30.1966	3.9e-08	31.1422	2.4e-08
	rs55872725	rs11642015	16	53809123	0.646003	C	T	0.596233	0.999746	31.3426	2.2e-08	0.114493	0.0208404	30.1821	3.9e-08	31.5373	2e-08
	rs6709441	rs1562308	2	61436930	0.875706	A	T	0.615695	0.997287	32.1616	1.4e-08	-0.114782	0.0208923	30.1841	3.9e-08	31.5012	2e-08
	rs9401882	rs10457480	6	126755055	1.32696	A	G	0.543971	0.998934	22.8815	1.7e-06	-0.112477	0.020462	30.2155	3.9e-08	31.7959	1.7e-08
	rs9923147	rs11642015	16	53801549	0.645971	C	T	0.576583	0.999882	30.5686	3.2e-08	0.113688	0.020693	30.1845	3.9e-08	31.1227	2.4e-08
	rs9939973	rs11642015	16	53800568	0.645971	G	A	0.576598	0.999897	30.5508	3.3e-08	0.113691	0.0206932	30.1853	3.9e-08	31.1103	2.4e-08
	rs9940278	rs11642015	16	53800200	0.64597	C	T	0.576612	0.999798	30.5841	3.2e-08	0.113746	0.0206941	30.2116	3.9e-08	31.1449	2.4e-08
	rs9940646	rs11642015	16	53800629	0.645971	C	G	0.576595	0.999902	30.55	3.3e-08	0.113677	0.0206931	30.1784	3.9e-08	31.1052	2.4e-08
	rs2600661	rs1562308	2	61543081	0.875823	T	C	0.608014	0.997734	33.7041	6.4e-09	-0.114224	0.0208077	30.1346	4e-08	31.7733	1.7e-08
	rs163874	rs2761589	11	30970207	0.48386	C	T	0.327528	0.989358	28.1024	1.2e-07	0.11933	0.0217818	30.0131	4.3e-08	30.3108	3.7e-08
	rs9930333	rs11642015	16	53799977	0.64597	T	G	0.576597	0.999781	30.3968	3.5e-08	0.113395	0.0206941	30.0256	4.3e-08	30.9575	2.6e-08
	rs9930397	rs11642015	16	53799985	0.64597	T	A	0.576597	0.999781	30.3972	3.5e-08	0.113397	0.0206941	30.0269	4.3e-08	30.9586	2.6e-08
	rs158505	rs2761589	11	30981248	0.483862	T	C	0.327394	0.988853	28.1069	1.1e-07	0.119285	0.0217893	29.9702	4.4e-08	30.2622	3.8e-08
	rs12981072	rs838133	19	49241006	0.774753	C	G	0.564965	0.987466	22.4528	2.2e-06	0.113221	0.0207033	29.9072	4.5e-08	30.5751	3.2e-08
	rs1558902	rs11642015	16	53803574	0.645989	T	A	0.596225	0.999664	31.3021	2.2e-08	0.113915	0.0208424	29.8721	4.6e-08	31.1883	2.3e-08
	rs163854	rs2761589	11	30964632	0.483856	G	T	0.327533	0.989874	28.0115	1.2e-07	0.119019	0.0217761	29.8723	4.6e-08	30.1691	4e-08
	rs4418209	rs10457480	6	126819699	1.32699	T	G	0.544619	0.999488	22.5625	2e-06	-0.111869	0.0204595	29.8971	4.6e-08	31.4002	2.1e-08
	rs273605	rs2761589	11	30965855	0.483857	A	T	0.329062	0.989173	27.401	1.7e-07	0.118816	0.0217544	29.8301	4.7e-08	30.1801	3.9e-08
	rs62048402	rs11642015	16	53803223	0.645988	G	A	0.59624	0.999642	31.2902	2.2e-08	0.113884	0.0208426	29.8551	4.7e-08	31.1732	2.4e-08
	rs9940128	rs11642015	16	53800754	0.645971	G	A	0.576499	1	30.2239	3.8e-08	0.113017	0.0206946	29.8244	4.7e-08	30.753	2.9e-08
	rs273604	rs2761589	11	30966112	0.483857	G	A	0.328716	0.989728	27.32	1.7e-07	0.118659	0.0217573	29.7435	4.9e-08	30.0703	4.2e-08
	rs9372840	rs10457480	6	126822635	1.32699	A	C	0.544482	0.9997	22.4083	2.2e-06	-0.111557	0.0204552	29.7433	4.9e-08	31.2806	2.2e-08
	* all lead SNPs and SNPs in 500KB spanning around the lead SNPs that reached our genome-wide significance threshold (P<1×10-9) are included in this look-up; SNP: rs number;CHR: chromosome; BP: physical (base pair) position; GENPOS: genetic position either from bim file or interpolated from genetic map; ALLELE1: first allele in bim file (usually the minor allele), used as the effect allele; ALLELE…
