# Supplementary material for: GWAS for urinary sodium and potassium excretion highlights pathways shared with cardiovascular traits
Source: Nat Commun. 2019 Aug 13;10:3653. doi: 10.1038/s41467-019-11451-y (PMC6692500; doi:10.1038/s41467-019-11451-y)
Supplement: Supplementary file 16 — Supplementary Dataset 16 [file 41467_2019_11451_MOESM16_ESM.xlsx]

## Sheet: Supplementary Data 16
	Supplementary Data 16: Association of urinary potassium loci with SBP and DBP within the UK Biobank study at P<5×10-8.
SBP
	SNP*	Locus	CHR	BP	GENPOS	ALLELE1	ALLELE0	A1FREQ	INFO	CHISQ_LINREG	P_LINREG	BETA	SE	CHISQ_BOLT_LMM_INF	P_BOLT_LMM_INF	CHISQ_BOLT_LMM	P_BOLT_LMM
	rs55782834	rs4973766	3	27372628	0.486709	C	T	0.524749	0.997619	58.0515	2.6e-14	0.312228	0.0362458	74.204	7e-18	72.0637	2.1e-17
	rs1352944	rs4973766	3	27374101	0.48671	C	A	0.524709	0.997378	57.6449	3.1e-14	0.311247	0.0362497	73.7227	9e-18	71.5999	2.6e-17
	rs1352943	rs4973766	3	27368875	0.486698	C	G	0.528746	0.999813	58.5683	2e-14	0.310534	0.0362172	73.5172	1e-17	71.3995	2.9e-17
	rs3920005	rs4973766	3	27368884	0.486698	T	C	0.528403	1	57.899	2.8e-14	0.309679	0.0362151	73.1212	1.2e-17	71.0406	3.5e-17
	rs491976	rs4973766	3	27367221	0.486694	T	C	0.471892	0.99911	58.2368	2.3e-14	-0.309724	0.0362291	73.0859	1.2e-17	71.1129	3.4e-17
	rs2034190	rs4973766	3	27292557	0.48663	T	C	0.472159	0.998119	56.7539	4.9e-14	-0.303576	0.036243	70.1595	5.5e-17	68.1657	1.5e-16
	rs2370941	rs4973766	3	27292683	0.48663	C	A	0.472367	0.997908	56.501	5.6e-14	-0.30308	0.0362448	69.9235	6.2e-17	67.9825	1.6e-16
	rs583298	rs4973766	3	27361880	0.486671	T	C	0.473847	0.997668	55.3683	1e-13	-0.30248	0.0362437	69.6509	7.1e-17	67.4866	2.1e-16
	rs2370942	rs4973766	3	27286810	0.486608	G	C	0.472747	0.996322	56.2315	6.4e-14	-0.302575	0.0362644	69.6153	7.2e-17	67.6874	1.9e-16
	rs1579817	rs4973766	3	27310595	0.48663	C	T	0.472692	0.998091	56.0756	7e-14	-0.302211	0.0362448	69.5232	7.6e-17	67.5864	2e-16
	rs2120890	rs4973766	3	27271224	0.4866	C	T	0.472559	0.996133	55.8298	7.9e-14	-0.302392	0.0362692	69.5128	7.6e-17	67.6566	1.9e-16
	rs3213930	rs4973766	3	27297816	0.48663	G	C	0.472025	0.998171	55.8596	7.8e-14	-0.302075	0.0362437	69.4645	7.8e-17	67.5342	2.1e-16
	rs2100006	rs4973766	3	27273415	0.486607	G	A	0.472394	0.996493	55.8066	8e-14	-0.302131	0.0362651	69.4086	8e-17	67.4925	2.1e-16
	rs1899997	rs4973766	3	27307196	0.48663	A	G	0.472342	0.998137	55.5016	9.3e-14	-0.301899	0.0362446	69.3801	8.1e-17	67.4481	2.2e-16
	rs1899998	rs4973766	3	27307155	0.48663	C	T	0.472348	0.998145	55.4692	9.5e-14	-0.301861	0.0362443	69.3644	8.2e-17	67.4345	2.2e-16
	rs6779140	rs4973766	3	27285151	0.486608	C	T	0.47258	0.996655	55.7858	8.1e-14	-0.302013	0.0362608	69.3706	8.2e-17	67.5326	2.1e-16
	rs6787882	rs4973766	3	27270459	0.486596	G	C	0.472477	0.996079	55.6907	8.5e-14	-0.302006	0.0362696	69.334	8.3e-17	67.4768	2.1e-16
	rs547518	rs4973766	3	27358405	0.486659	A	T	0.473896	0.998013	55.1505	1.1e-13	-0.301711	0.0362376	69.3209	8.4e-17	67.1441	2.5e-16
	rs599298	rs4973766	3	27355115	0.486651	T	C	0.473806	0.998642	55.2529	1.1e-13	-0.301442	0.0362287	69.2313	8.8e-17	66.9956	2.7e-16
	rs6551184	rs4973766	3	27299001	0.48663	A	G	0.472184	0.998093	55.5203	9.2e-14	-0.301384	0.0362439	69.1466	9.1e-17	67.2594	2.4e-16
	rs552647	rs4973766	3	27353716	0.48665	C	A	0.474048	0.998745	54.9145	1.3e-13	-0.301071	0.0362242	69.078	9.5e-17	66.9157	2.8e-16
	rs616820	rs4973766	3	27356779	0.486653	C	G	0.473967	0.99845	55.0114	1.2e-13	-0.301079	0.03623	69.0594	9.6e-17	66.892	2.9e-16
	rs646157	rs4973766	3	27352143	0.486649	T	A	0.473749	0.998804	55.0355	1.2e-13	-0.300993	0.0362268	69.0324	9.7e-17	66.7724	3e-16
	rs633157	rs4973766	3	27335350	0.486642	A	T	0.472679	0.999074	54.955	1.2e-13	-0.300875	0.0362293	68.9686	1e-16	66.9334	2.8e-16
	rs7622813	rs4973766	3	27309145	0.48663	C	T	0.472545	0.998168	55.1562	1.1e-13	-0.300891	0.0362429	68.9242	1e-16	67.0771	2.6e-16
	rs11914763	rs4973766	3	27319538	0.486634	A	T	0.472591	0.998342	55.2811	1e-13	-0.300723	0.0362385	68.8641	1.1e-16	66.9405	2.8e-16
	rs6551183	rs4973766	3	27281198	0.486608	G	T	0.475332	0.995536	55.4163	9.8e-14	-0.300733	0.0362705	68.7475	1.1e-16	66.9056	2.8e-16
	rs628802	rs4973766	3	27341789	0.486645	A	G	0.473792	0.998812	54.9486	1.2e-13	-0.299952	0.0362274	68.5533	1.2e-16	66.3853	3.7e-16
	rs571978	rs4973766	3	27344193	0.486646	A	G	0.47362	0.998802	54.6574	1.4e-13	-0.299703	0.0362297	68.4308	1.3e-16	66.2029	4.1e-16
	rs9838558	rs4973766	3	27317858	0.486632	C	G	0.472021	0.997342	55.0323	1.2e-13	-0.299948	0.0362597	68.4298	1.3e-16	66.3908	3.7e-16
	rs11711853	rs4973766	3	27317846	0.486632	C	A	0.471981	0.997386	54.8496	1.3e-13	-0.299761	0.0362605	68.3412	1.4e-16	66.2914	3.9e-16
	rs628866	rs4973766	3	27341833	0.486645	C	T	0.473862	0.998659	54.4533	1.6e-13	-0.299408	0.0362304	68.2937	1.4e-16	66.1282	4.2e-16
	rs3103743	rs4973766	3	27327965	0.486639	A	C	0.472473	0.998768	54.6736	1.4e-13	-0.299108	0.0362332	68.1463	1.5e-16	66.148	4.2e-16
	rs472146	rs4973766	3	27337379	0.486642	T	C	0.472552	0.99907	54.5039	1.6e-13	-0.299092	0.0362292	68.1541	1.5e-16	66.1241	4.2e-16
	rs481519	rs4973766	3	27327214	0.486639	C	T	0.47246	0.998875	54.7369	1.4e-13	-0.299236	0.0362316	68.2108	1.5e-16	66.2163	4e-16
	rs2004005	rs4973766	3	27266705	0.486581	C	T	0.466453	0.997255	55.2283	1.1e-13	-0.299192	0.0362645	68.0669	1.6e-16	65.748	5.1e-16
	rs479566	rs4973766	3	27326999	0.486639	T	C	0.472406	0.998881	54.6016	1.5e-13	-0.298971	0.0362312	68.0913	1.6e-16	66.1091	4.3e-16
	rs653465	rs4973766	3	27343644	0.486646	C	T	0.473808	0.998734	54.2705	1.7e-13	-0.298938	0.0362292	68.0839	1.6e-16	65.9242	4.7e-16
	rs487930	rs4973766	3	27330335	0.48664	C	A	0.473821	0.998673	54.2595	1.8e-13	-0.297978	0.0362275	67.6539	1.9e-16	65.5479	5.7e-16
	rs580057	rs4973766	3	27345103	0.486647	G	A	0.473685	0.99899	54.0262	2e-13	-0.297997	0.0362253	67.6706	1.9e-16	65.5118	5.8e-16
	rs490706	rs4973766	3	27330615	0.48664	G	A	0.473688	0.998733	53.8457	2.2e-13	-0.297303	0.0362287	67.343	2.3e-16	65.1791	6.8e-16
	rs7626742	rs4973766	3	27268398	0.486594	G	T	0.466774	0.995958	54.7887	1.3e-13	-0.296467	0.0362915	66.7335	3.1e-16	64.3248	1.1e-15
	rs1472254	rs4973766	3	27427225	0.486833	A	G	0.471229	0.998256	45.4232	1.6e-11	-0.290519	0.0362837	64.1097	1.2e-15	63.4783	1.6e-15
	rs1494420	rs4973766	3	27487705	0.486854	C	T	0.471905	0.998281	44.6322	2.4e-11	-0.288455	0.0362732	63.239	1.8e-15	62.5717	2.6e-15
	rs4973730	rs4973766	3	27519195	0.486878	G	A	0.471993	0.9967	44.3297	2.8e-11	-0.288127	0.0363004	63.0007	2.1e-15	62.374	2.8e-15
	rs7619833	rs4973766	3	27509714	0.486872	G	C	0.471919	0.997298	43.9637	3.3e-11	-0.28778	0.0362901	62.8848	2.2e-15	62.2305	3.1e-15
	rs1445111	rs4973766	3	27253971	0.486567	C	T	0.449396	0.998417	46.9421	7.3e-12	-0.276076	0.0363657	57.6333	3.2e-14	55.5666	9e-14
	rs4973756	rs4973766	3	27248190	0.486567	C	T	0.449504	0.998139	46.7262	8.2e-12	-0.275149	0.0363702	57.2326	3.9e-14	55.2095	1.1e-13
	rs1445108	rs4973766	3	27231558	0.486565	G	A	0.438174	0.995697	46.3829	9.7e-12	-0.275425	0.0364875	56.9794	4.4e-14	55.3753	1e-13
	rs6551179	rs4973766	3	27236385	0.486565	C	T	0.438203	0.995902	46.3967	9.7e-12	-0.275252	0.0364834	56.9209	4.5e-14	55.2977	1e-13
	rs9848482	rs4973766	3	27224050	0.486556	G	A	0.438068	0.993983	46.7249	8.2e-12	-0.275558	0.0365198	56.9336	4.5e-14	55.3381	1e-13
	rs7620772	rs4973766	3	27238349	0.486565	C	G	0.438364	0.996008	46.0567	1.1e-11	-0.274177	0.0364846	56.4734	5.7e-14	54.9093	1.3e-13
	rs11129270	rs4973766	3	27257943	0.486567	A	G	0.454023	0.998336	46.0651	1.1e-11	-0.272401	0.0363334	56.2091	6.5e-14	54.1095	1.9e-13
	rs13085724	rs4973766	3	27258758	0.486567	C	T	0.454064	0.998365	46.1219	1.1e-11	-0.272379	0.0363323	56.2032	6.5e-14	54.1012	1.9e-13
	rs9820391	rs4973766	3	27238725	0.486565	G	A	0.443261	0.996283	46.2501	1e-11	-0.273161	0.0364347	56.2091	6.5e-14	54.4439	1.6e-13
	rs9842044	rs4973766	3	27263248	0.486567	G	C	0.454087	0.9984	46.0938	1.1e-11	-0.272346	0.0363327	56.1887	6.6e-14	54.0957	1.9e-13
	rs6551176	rs4973766	3	27230587	0.486565	A	G	0.438125	0.995597	45.6653	1.4e-11	-0.273403	0.0364885	56.1426	6.7e-14	54.5084	1.5e-13
	rs6551182	rs4973766	3	27252491	0.486567	T	A	0.454154	0.998429	45.97	1.2e-11	-0.272199	0.0363326	56.128	6.8e-14	54.0162	2e-13
	rs7615829	rs4973766	3	27252196	0.486567	C	G	0.454196	0.998419	45.9702	1.2e-11	-0.27209	0.0363321	56.0846	6.9e-14	53.9847	2e-13
	rs2370946	rs4973766	3	27260283	0.486567	G	A	0.454024	0.998274	45.9022	1.2e-11	-0.271937	0.036334	56.0158	7.2e-14	53.969	2e-13
	rs10049490	rs4973766	3	27241776	0.486566	G	T	0.443328	0.996254	45.716	1.4e-11	-0.271518	0.0364343	55.5361	9.2e-14	53.7295	2.3e-13
	rs9832789	rs4973766	3	27228834	0.486565	A	C	0.438051	0.995551	45.1009	1.9e-11	-0.27193	0.0364911	55.5317	9.2e-14	53.908	2.1e-13
	rs12487340	rs4973766	3	27208975	0.486527	C	T	0.46377	0.990057	46.2782	1e-11	-0.269928	0.0364143	54.9479	1.2e-13	52.8244	3.6e-13
	rs1013673	rs4973766	3	27206003	0.48652	A	C	0.535762	0.990299	44.8771	2.1e-11	0.26973	0.0364001	54.9101	1.3e-13	52.7404	3.8e-13
	rs7618042	rs4973766	3	27207700	0.486524	C	T	0.464178	0.990852	44.6919	2.3e-11	-0.269264	0.0363936	54.7401	1.4e-13	52.5704	4.2e-13
	rs7641830	rs4973766	3	27208003	0.486525	G	A	0.464009	0.990983	44.5322	2.5e-11	-0.268659	0.0363945	54.4919	1.6e-13	52.352	4.6e-13
	rs1851366	rs4973766	3	27194844	0.486494	T	C	0.536728	0.989749	44.9763	2e-11	0.268366	0.0364148	54.3123	1.7e-13	52.1346	5.2e-13
	rs542946	rs4973766	3	27349849	0.486648	T	G	0.446352	0.990454	42.7361	6.3e-11	-0.269317	0.0365303	54.3527	1.7e-13	52.976	3.4e-13
	rs12495041	rs4973766	3	27197869	0.4865	G	A	0.537199	0.989997	44.7329	2.3e-11	0.267727	0.0364155	54.0521	2e-13	51.9899	5.6e-13
	rs7653795	rs4973766	3	27217080	0.486542	G	A	0.462269	0.993217	43.716	3.8e-11	-0.267008	0.0363723	53.89	2.1e-13	51.783	6.2e-13
	rs11129266	rs4973766	3	27194165	0.486494	A	T	0.536885	0.989755	44.5198	2.5e-11	0.267067	0.0364162	53.7838	2.2e-13	51.6309	6.7e-13
	rs7634574	rs4973766	3	27223319	0.486554	C	A	0.462127	0.995763	43.5028	4.2e-11	-0.266011	0.0363296	53.6139	2.4e-13	51.4818	7.2e-13
	rs9858306	rs4973766	3	27222542	0.486552	T	G	0.462017	0.995314	43.3822	4.5e-11	-0.265719	0.036338	53.4718	2.6e-13	51.3483	7.7e-13
	rs12715119	rs4973766	3	27221769	0.48655	T	C	0.456798	0.99453	41.9528	9.4e-11	-0.263585	0.0363851	52.4799	4.3e-13	50.4943	1.2e-12
	rs1609978	rs4973766	3	27203626	0.486514	G	A	0.542139	0.990101	41.4662	1.2e-10	0.261036	0.0364476	51.2934	8e-13	49.4271	2.1e-12
	rs11719250	rs4973766	3	27174261	0.486425	G	T	0.534287	0.996959	42.4502	7.3e-11	0.259104	0.0362786	51.0092	9.2e-13	48.9401	2.6e-12
	rs1357245	rs4973766	3	27186602	0.486482	C	T	0.542443	0.989997	41.2409	1.3e-10	0.259289	0.0364489	50.6058	1.1e-12	48.7877	2.9e-12
	rs2370925	rs4973766	3	27144161	0.486383	A	G	0.533759	0.996234	41.5292	1.2e-10	0.256907	0.0362928	50.1084	1.5e-12	48.1197	4e-12
	rs11129264	rs4973766	3	27146294	0.486385	A	G	0.53416	0.996385	40.9575	1.6e-10	0.255781	0.0362928	49.6702	1.8e-12	47.6048	5.2e-12
	rs11710255	rs4973766	3	27145591	0.486384	C	G	0.534282	0.996494	40.917	1.6e-10	0.255911	0.0362919	49.7232	1.8e-12	47.706	5e-12
	rs11129263	rs4973766	3	27143527	0.486383	A	G	0.534049	0.996087	41.0779	1.5e-10	0.255346	0.0362992	49.484	2e-12	47.5472	5.4e-12
	rs1352941	rs4973766	3	27368425	0.486697	C	T	0.499307	0.998584	36.0569	1.9e-09	0.253511	0.0361746	49.1117	2.4e-12	47.105	6.7e-12
	rs1522151	rs4973766	3	27165174	0.48641	A	G	0.533576	1	40.5886	1.9e-10	0.25347	0.0362365	48.9283	2.7e-12	47.2594	6.2e-12
	rs11129262	rs4973766	3	27143287	0.486383	C	G	0.539341	0.995966	38.9199	4.4e-10	0.251409	0.0363301	47.8881	4.5e-12	46.1349	1.1e-11
	rs56259835	rs4973766	3	27166202	0.486411	C	T	0.539545	0.998648	38.839	4.6e-10	0.250103	0.0362811	47.52	5.4e-12	45.6808	1.4e-11
	rs11129261	rs4973766	3	27141808	0.486382	T	A	0.539978	0.996052	38.1414	6.6e-10	0.24844	0.0363317	46.7597	8e-12	44.9504	2e-11
	rs12488954	rs4973766	3	27145162	0.486384	G	A	0.540253	0.995976	37.5454	8.9e-10	0.247693	0.036335	46.4705	9.3e-12	44.6299	2.4e-11
	rs17349692	rs4973766	3	27124001	0.486363	G	A	0.539635	0.996077	37.5544	8.9e-10	0.246347	0.036335	45.9669	1.2e-11	44.3496	2.7e-11
	rs67565656	rs4973766	3	27124194	0.486365	G	A	0.539653	0.996124	37.5049	9.1e-10	0.246158	0.0363345	45.8975	1.2e-11	44.2842	2.8e-11
	rs1402972	rs4973766	3	27131168	0.486373	A	G	0.539532	0.996551	37.3429	9.9e-10	0.245675	0.0363222	45.7486	1.3e-11	44.043	3.2e-11
	rs1402980	rs4973766	3	27123670	0.486363	G	A	0.539645	0.996076	37.515	9.1e-10	0.246129	0.0363353	45.8847	1.3e-11	44.2702	2.9e-11
	rs67573383	rs4973766	3	27138586	0.486375	C	A	0.539508	0.996678	37.5875	8.7e-10	0.245976	0.0363161	45.876	1.3e-11	44.1451	3e-11
	rs10865811	rs4973766	3	27135957	0.486374	G	A	0.539168	0.996522	37.5941	8.7e-10	0.245506	0.0363188	45.6943	1.4e-11	44.0999	3.1e-11
	rs1402975	rs4973766	3	27125652	0.48637	G	A	0.539532	0.996264	36.9643	1.2e-09	0.244599	0.0363304	45.3284	1.7e-11	43.673	3.9e-11
	rs6774748	rs4973766	3	27405705	0.486742	A	G	0.525864	0.995403	28.1976	1.1e-07	-0.234747	0.0363248	41.7631	1e-10	40.3163	2.2e-10
	rs4973768	rs4973766	3	27416013	0.486773	C	T	0.52594	1	26.8042	2.3e-07	-0.230537	0.0363611	40.1982	2.3e-10	38.872	4.5e-10
	rs1051545	rs4973766	3	27416999	0.486779	T	C	0.524078	0.997745	26.4725	2.7e-07	-0.228553	0.0362833	39.6789	3e-10	38.4371	5.7e-10
	rs66506821	rs4973766	3	27121942	0.486358	G	A	0.555713	0.995045	30.2652	3.8e-08	0.227855	0.036466	39.0428	4.1e-10	37.3102	1e-09
	rs4973766	rs4973766	3	27413566	0.48676	C	T	0.542621	0.997149	23.2427	1.4e-06	-0.213647	0.0363686	34.5096	4.2e-09	33.4683	7.2e-09
DBP	SNP*	Locus	CHR	BP	GENPOS	ALLELE1	ALLELE0	A1FREQ	INFO	CHISQ_LINREG	P_LINREG	BETA	SE	CHISQ_BOLT_LMM_INF	P_BOLT_LMM_INF	CHISQ_BOLT_LMM	P_BOLT_LMM
	rs2470893	rs2472297	15	75019449	1.00291	C	T	0.670263	1	37.246	1e-09	0.147366	0.0216763	46.2195	1.1e-11	48.0474	4.2e-12
	rs35107470	rs2472297	15	74817689	1.00278	A	G	0.677569	0.942692	34.7619	3.7e-09	0.147555	0.022457	43.1725	5e-11	44.5622	2.5e-11
	rs55782834	rs4973766	3	27372628	0.486709	C	T	0.52475	0.997619	30.5765	3.2e-08	0.117452	0.0203911	33.1773	8.4e-09	32.1189	1.5e-08
	rs1352944	rs4973766	3	27374101	0.48671	C	A	0.52471	0.997378	30.2592	3.8e-08	0.116962	0.0203933	32.8939	9.7e-09	31.8537	1.7e-08
	rs491976	rs4973766	3	27367221	0.486694	T	C	0.471892	0.99911	29.6162	5.3e-08	-0.114421	0.0203817	31.516	2e-08	30.6585	3.1e-08
	rs1873379	rs2472297	15	75498744	1.00427	G	C	0.714674	1	23.6882	1.1e-06	0.126656	0.0225871	31.4434	2.1e-08	30.4942	3.3e-08
	rs3920005	rs4973766	3	27368884	0.486698	T	C	0.528404	1	29.2934	6.2e-08	0.113823	0.0203738	31.2115	2.3e-08	30.2805	3.7e-08
	rs1352943	rs4973766	3	27368875	0.486698	C	G	0.528747	0.999813	29.4591	5.7e-08	0.113629	0.020375	31.1019	2.4e-08	30.1602	4e-08
	rs76307456	rs2472297	15	75492307	1.00424	C	T	0.714705	0.992836	23.4968	1.3e-06	0.125883	0.022656	30.8721	2.8e-08	30.0923	4.1e-08
	* all lead SNPs and SNPs in 500KB spanning around the lead SNPs that reached our genome-wide significance threshold (P<1×10-9) are included in this look-up; SNP: rs number;CHR: chromosome; BP: physical (base pair) position; GENPOS: genetic position either from bim file or interpolated from genetic map; ALLELE1: first allele in bim file (usually the minor allele), used as the effect allele; ALLELE…
