# Supplementary material for: GWAS for urinary sodium and potassium excretion highlights pathways shared with cardiovascular traits
Source: Nat Commun. 2019 Aug 13;10:3653. doi: 10.1038/s41467-019-11451-y (PMC6692500; doi:10.1038/s41467-019-11451-y)
Supplement: Supplementary file 17 — Supplementary Dataset 17 [file 41467_2019_11451_MOESM17_ESM.xlsx]

## Sheet: Supplementary Data 17
	Supplementary Data 17: Association of urinary sodium and potassium loci with metabolites in phenoscanner (P < 5 × 10-8 ).
	SNP	rsID	Pos (hg19)	Alleles	Proxy rsID	Proxy Pos (hg19)	Proxy Alleles	r2	Dprime	Proxy Indicator	Trait	Study	PMID	Year of Publication	Ancestry	Source	Effect Allele	Association Alleles	EAF	Beta	SE	P	N	N Studies
Sodium	rs1260326	rs1260326	chr2:27730940	C/T	rs1260326	chr2:27730940	C/T	1	1	0	Mannose	Shin S	24816252	2014	European	Shin S	C	C/T	0.5912	0.0439	0.0024	1.296e-77	7345	2
	rs1260326	rs1260326	chr2:27730940	C/T	rs780093	chr2:27742603	C/T	0.908	0.955	1	Mannose	Shin S	24816252	2014	European	Shin S	C	C/T	0.6015	0.0433	0.0024	1.483e-75	7345	2
	rs1260326	rs1260326	chr2:27730940	C/T	rs780094	chr2:27741237	C/T	0.912	0.955	1	Mannose	Shin S	24816252	2014	European	Shin S	C	C/T	0.6023	0.0428	0.0024	6.889e-73	7345	2
	rs1260326	rs1260326	chr2:27730940	C/T	rs1260326	chr2:27730940	C/T	1	1	0	Alanine	Kettunen J	27005778	2016	European	Kettunen J	C	C/T	0.6388	-0.1046	0.00994	7.4e-26	22569	13
	rs1260326	rs1260326	chr2:27730940	C/T	rs1260326	chr2:27730940	C/T	1	1	0	Serum total triglycerides	Kettunen J	27005778	2016	European	Kettunen J	C	C/T	0.6389	-0.106	0.01021	1e-24	21545	12
	rs1260326	rs1260326	chr2:27730940	C/T	rs780094	chr2:27741237	C/T	0.912	0.955	1	Alanine	Kettunen J	27005778	2016	European	Kettunen J	C	C/T	0.6344	-0.09731	0.009899	8.95e-23	22569	13
	rs1260326	rs1260326	chr2:27730940	C/T	rs780094	chr2:27741237	C/T	0.912	0.955	1	Serum total triglycerides	Kettunen J	27005778	2016	European	Kettunen J	C	C/T	0.6332	-0.1007	0.01014	1e-22	21545	12
	rs1260326	rs1260326	chr2:27730940	C/T	rs780093	chr2:27742603	C/T	0.908	0.955	1	Alanine	Kettunen J	27005778	2016	European	Kettunen J	C	C/T	0.637	-0.09235	0.009476	2.05e-22	24794	14
	rs1260326	rs1260326	chr2:27730940	C/T	rs780093	chr2:27742603	C/T	0.908	0.955	1	Serum total triglycerides	Kettunen J	27005778	2016	European	Kettunen J	C	C/T	0.6362	-0.09908	0.01014	4.39e-22	21543	12
	rs1260326	rs1260326	chr2:27730940	C/T	rs1260326	chr2:27730940	C/T	1	1	0	Triglycerides in small VLDL	Kettunen J	27005778	2016	European	Kettunen J	C	C/T	0.6389	-0.09945	0.0102	6.23e-22	21558	12
	rs1260326	rs1260326	chr2:27730940	C/T	rs4665972	chr2:27598097	C/T	0.869	0.942	1	Serum total triglycerides	Kettunen J	27005778	2016	European	Kettunen J	C	C/T	0.6087	-0.09968	0.01031	1.21e-21	21542	12
	rs1260326	rs1260326	chr2:27730940	C/T	rs1260326	chr2:27730940	C/T	1	1	0	Free cholesterol in medium VLDL	Kettunen J	27005778	2016	European	Kettunen J	C	C/T	0.6392	-0.09897	0.01027	1.38e-21	21240	12
	rs1260326	rs1260326	chr2:27730940	C/T	rs4665972	chr2:27598097	C/T	0.869	0.942	1	Alanine	Kettunen J	27005778	2016	European	Kettunen J	C	C/T	0.6088	-0.09125	0.00967	4.1e-21	24793	14
	rs1260326	rs1260326	chr2:27730940	C/T	rs1260326	chr2:27730940	C/T	1	1	0	Phospholipids in medium VLDL	Kettunen J	27005778	2016	European	Kettunen J	C	C/T	0.6392	-0.09786	0.01028	4.48e-21	21240	12
	rs1260326	rs1260326	chr2:27730940	C/T	rs1260326	chr2:27730940	C/T	1	1	0	Phospholipids in large VLDL	Kettunen J	27005778	2016	European	Kettunen J	C	C/T	0.6392	-0.09682	0.01028	9.13e-21	21239	12
	rs1260326	rs1260326	chr2:27730940	C/T	rs1260326	chr2:27730940	C/T	1	1	0	MonoLunsaturated fatty acids	Kettunen J	27005778	2016	European	Kettunen J	C	C/T	0.6368	-0.1175	0.01265	3.53e-20	13535	10
	rs1260326	rs1260326	chr2:27730940	C/T	rs1260326	chr2:27730940	C/T	1	1	0	Total cholesterol in medium VLDL	Kettunen J	27005778	2016	European	Kettunen J	C	C/T	0.6389	-0.09445	0.0102	5.02e-20	21551	12
	rs1260326	rs1260326	chr2:27730940	C/T	rs780094	chr2:27741237	C/T	0.912	0.955	1	Phospholipids in large VLDL	Kettunen J	27005778	2016	European	Kettunen J	C	C/T	0.6336	-0.09412	0.01021	6.15e-20	21239	12
	rs1260326	rs1260326	chr2:27730940	C/T	rs780094	chr2:27741237	C/T	0.912	0.955	1	Free cholesterol in medium VLDL	Kettunen J	27005778	2016	European	Kettunen J	C	C/T	0.6336	-0.09414	0.01021	6.64e-20	21240	12
	rs1260326	rs1260326	chr2:27730940	C/T	rs780094	chr2:27741237	C/T	0.912	0.955	1	Triglycerides in small VLDL	Kettunen J	27005778	2016	European	Kettunen J	C	C/T	0.6332	-0.09378	0.01014	6.74e-20	21558	12
	rs1260326	rs1260326	chr2:27730940	C/T	rs1260326	chr2:27730940	C/T	1	1	0	Triglycerides in medium VLDL	Kettunen J	27005778	2016	European	Kettunen J	C	C/T	0.6392	-0.09462	0.01028	6.8e-20	21241	12
	rs1260326	rs1260326	chr2:27730940	C/T	rs1260326	chr2:27730940	C/T	1	1	0	Free cholesterol in large VLDL	Kettunen J	27005778	2016	European	Kettunen J	C	C/T	0.6392	-0.09459	0.01028	7.17e-20	21238	12
	rs1260326	rs1260326	chr2:27730940	C/T	rs1260326	chr2:27730940	C/T	1	1	0	VLDL diameter	Kettunen J	27005778	2016	European	Kettunen J	C	C/T	0.6366	-0.09756	0.0106	7.9e-20	19273	11
	rs1260326	rs1260326	chr2:27730940	C/T	rs1260326	chr2:27730940	C/T	1	1	0	Triglycerides in chylomicrons and extremely large VLDL	Kettunen J	27005778	2016	European	Kettunen J	C	C/T	0.6389	-0.09349	0.0102	8.01e-20	21540	12
	rs33951980	rs33951980	chr7:73029437	C/T	rs13240065	chr7:73015369	G/A	0.944	0.972	1	VLDL diameter	Kettunen J	27005778	2016	European	Kettunen J	G	G/A	0.8764	0.1437	0.01564	9.31e-20	19268	11
	rs1260326	rs1260326	chr2:27730940	C/T	rs1260326	chr2:27730940	C/T	1	1	0	Triglycerides in large VLDL	Kettunen J	27005778	2016	European	Kettunen J	C	C/T	0.6392	-0.09421	0.01028	9.83e-20	21239	12
	rs33951980	rs33951980	chr7:73029437	C/T	rs13246993	chr7:73022746	G/A	0.962	1	1	VLDL diameter	Kettunen J	27005778	2016	European	Kettunen J	G	G/A	0.8767	0.1439	0.0157	1.16e-19	19268	11
	rs33951980	rs33951980	chr7:73029437	C/T	rs13234131	chr7:73025975	A/G	0.962	1	1	VLDL diameter	Kettunen J	27005778	2016	European	Kettunen J	A	A/G	0.8756	0.1437	0.0157	1.25e-19	19267	11
	rs33951980	rs33951980	chr7:73029437	C/T	rs3812316	chr7:73020337	C/G	0.953	0.99	1	VLDL diameter	Kettunen J	27005778	2016	European	Kettunen J	C	C/G	0.8766	0.1434	0.01568	1.36e-19	19268	11
	rs1260326	rs1260326	chr2:27730940	C/T	rs780093	chr2:27742603	C/T	0.908	0.955	1	Phospholipids in large VLDL	Kettunen J	27005778	2016	European	Kettunen J	C	C/T	0.6366	-0.09316	0.01021	1.41e-19	21237	12
	rs1260326	rs1260326	chr2:27730940	C/T	rs1260326	chr2:27730940	C/T	1	1	0	Triglycerides in very large VLDL	Kettunen J	27005778	2016	European	Kettunen J	C	C/T	0.6389	-0.093	0.01019	1.43e-19	21548	12
	rs1260326	rs1260326	chr2:27730940	C/T	rs780093	chr2:27742603	C/T	0.908	0.955	1	Free cholesterol in medium VLDL	Kettunen J	27005778	2016	European	Kettunen J	C	C/T	0.6366	-0.09324	0.01021	1.53e-19	21238	12
	rs33951980	rs33951980	chr7:73029437	C/T	rs13234378	chr7:73026151	A/T	0.962	1	1	VLDL diameter	Kettunen J	27005778	2016	European	Kettunen J	A	A/T	0.8763	0.1435	0.01572	1.54e-19	19269	11
	rs33951980	rs33951980	chr7:73029437	C/T	rs33951980	chr7:73029437	C/T	1	1	0	VLDL diameter	Kettunen J	27005778	2016	European	Kettunen J	C	C/T	0.876	0.1434	0.01573	1.76e-19	19268	11
	rs1260326	rs1260326	chr2:27730940	C/T	rs1260326	chr2:27730940	C/T	1	1	0	Concentration of large VLDL particles	Kettunen J	27005778	2016	European	Kettunen J	C	C/T	0.6368	-0.09825	0.01072	1.9e-19	18960	11
	rs1260326	rs1260326	chr2:27730940	C/T	rs780094	chr2:27741237	C/T	0.912	0.955	1	Phospholipids in medium VLDL	Kettunen J	27005778	2016	European	Kettunen J	C	C/T	0.6336	-0.09311	0.01022	1.92e-19	21240	12
	rs1260326	rs1260326	chr2:27730940	C/T	rs1260326	chr2:27730940	C/T	1	1	0	OmegaL7 and L9 and saturated fatty acids	Kettunen J	27005778	2016	European	Kettunen J	C	C/T	0.6368	-0.1149	0.01266	1.95e-19	13506	10
	rs33951980	rs33951980	chr7:73029437	C/T	rs71556736	chr7:73034929	C/T	0.991	1	1	VLDL diameter	Kettunen J	27005778	2016	European	Kettunen J	C	C/T	0.8749	0.1431	0.01571	1.96e-19	19271	11
	rs33951980	rs33951980	chr7:73029437	C/T	rs13229619	chr7:73030175	G/A	0.972	0.99	1	VLDL diameter	Kettunen J	27005778	2016	European	Kettunen J	G	G/A	0.8762	0.1429	0.01574	2.52e-19	19271	11
	rs33951980	rs33951980	chr7:73029437	C/T	rs34062580	chr7:73033559	G/A	0.991	1	1	VLDL diameter	Kettunen J	27005778	2016	European	Kettunen J	G	G/A	0.8762	0.1429	0.01575	2.67e-19	19268	11
	rs1260326	rs1260326	chr2:27730940	C/T	rs780093	chr2:27742603	C/T	0.908	0.955	1	Triglycerides in small VLDL	Kettunen J	27005778	2016	European	Kettunen J	C	C/T	0.6362	-0.09221	0.01014	2.73e-19	21556	12
	rs33951980	rs33951980	chr7:73029437	C/T	rs34060476	chr7:73037956	A/G	0.963	1	1	VLDL diameter	Kettunen J	27005778	2016	European	Kettunen J	A	A/G	0.8761	0.1429	0.01577	2.94e-19	19272	11
	rs1260326	rs1260326	chr2:27730940	C/T	rs1260326	chr2:27730940	C/T	1	1	0	Total lipids in medium VLDL	Kettunen J	27005778	2016	European	Kettunen J	C	C/T	0.6366	-0.09624	0.01061	2.98e-19	19273	11
	rs1260326	rs1260326	chr2:27730940	C/T	rs1260326	chr2:27730940	C/T	1	1	0	Phospholipids in small VLDL	Kettunen J	27005778	2016	European	Kettunen J	C	C/T	0.6389	-0.09232	0.0102	3.94e-19	21551	12
	rs1260326	rs1260326	chr2:27730940	C/T	rs4665972	chr2:27598097	C/T	0.869	0.942	1	Free cholesterol in medium VLDL	Kettunen J	27005778	2016	European	Kettunen J	C	C/T	0.609	-0.09375	0.01039	4.02e-19	21237	12
	rs1260326	rs1260326	chr2:27730940	C/T	rs1260326	chr2:27730940	C/T	1	1	0	Concentration of medium VLDL particles	Kettunen J	27005778	2016	European	Kettunen J	C	C/T	0.6366	-0.09611	0.01063	4.67e-19	19273	11
	rs1260326	rs1260326	chr2:27730940	C/T	rs780093	chr2:27742603	C/T	0.908	0.955	1	Phospholipids in medium VLDL	Kettunen J	27005778	2016	European	Kettunen J	C	C/T	0.6366	-0.09183	0.01022	5.97e-19	21238	12
	rs1260326	rs1260326	chr2:27730940	C/T	rs1260326	chr2:27730940	C/T	1	1	0	Total fatty acids	Kettunen J	27005778	2016	European	Kettunen J	C	C/T	0.6368	-0.1131	0.01267	6.24e-19	13505	10
	rs1260326	rs1260326	chr2:27730940	C/T	rs4665972	chr2:27598097	C/T	0.869	0.942	1	Triglycerides in small VLDL	Kettunen J	27005778	2016	European	Kettunen J	C	C/T	0.6087	-0.09233	0.01031	9.55e-19	21555	12
	rs1260326	rs1260326	chr2:27730940	C/T	rs4665972	chr2:27598097	C/T	0.869	0.942	1	Phospholipids in medium VLDL	Kettunen J	27005778	2016	European	Kettunen J	C	C/T	0.609	-0.09272	0.0104	1.08e-18	21237	12
	rs1260326	rs1260326	chr2:27730940	C/T	rs780093	chr2:27742603	C/T	0.908	0.955	1	Free cholesterol in large VLDL	Kettunen J	27005778	2016	European	Kettunen J	C	C/T	0.6366	-0.09087	0.01021	1.14e-18	21236	12
	rs1260326	rs1260326	chr2:27730940	C/T	rs1260326	chr2:27730940	C/T	1	1	0	Concentration of small VLDL particles	Kettunen J	27005778	2016	European	Kettunen J	C	C/T	0.6366	-0.09499	0.01062	1.17e-18	19273	11
	rs1260326	rs1260326	chr2:27730940	C/T	rs780093	chr2:27742603	C/T	0.908	0.955	1	Triglycerides in large VLDL	Kettunen J	27005778	2016	European	Kettunen J	C	C/T	0.6366	-0.09068	0.01021	1.26e-18	21237	12
	rs1260326	rs1260326	chr2:27730940	C/T	rs780094	chr2:27741237	C/T	0.912	0.955	1	Free cholesterol in large VLDL	Kettunen J	27005778	2016	European	Kettunen J	C	C/T	0.6336	-0.09074	0.01021	1.28e-18	21238	12
	rs1260326	rs1260326	chr2:27730940	C/T	rs780094	chr2:27741237	C/T	0.912	0.955	1	Triglycerides in large VLDL	Kettunen J	27005778	2016	European	Kettunen J	C	C/T	0.6336	-0.09071	0.01022	1.28e-18	21239	12
	rs1260326	rs1260326	chr2:27730940	C/T	rs780094	chr2:27741237	C/T	0.912	0.955	1	Triglycerides in chylomicrons and extremely large VLDL	Kettunen J	27005778	2016	European	Kettunen J	C	C/T	0.6332	-0.08932	0.01014	1.94e-18	21540	12
	rs1260326	rs1260326	chr2:27730940	C/T	rs4665972	chr2:27598097	C/T	0.869	0.942	1	Phospholipids in large VLDL	Kettunen J	27005778	2016	European	Kettunen J	C	C/T	0.609	-0.09151	0.01039	2.35e-18	21236	12
	rs1260326	rs1260326	chr2:27730940	C/T	rs1260326	chr2:27730940	C/T	1	1	0	Phospholipids in very large VLDL	Kettunen J	27005778	2016	European	Kettunen J	C	C/T	0.6392	-0.09048	0.01028	2.86e-18	21237	12
	rs1260326	rs1260326	chr2:27730940	C/T	rs780094	chr2:27741237	C/T	0.912	0.955	1	Total cholesterol in medium VLDL	Kettunen J	27005778	2016	European	Kettunen J	C	C/T	0.6332	-0.08919	0.01014	3.13e-18	21551	12
	rs1260326	rs1260326	chr2:27730940	C/T	rs780094	chr2:27741237	C/T	0.912	0.955	1	Triglycerides in very large VLDL	Kettunen J	27005778	2016	European	Kettunen J	C	C/T	0.6332	-0.08864	0.01013	3.97e-18	21548	12
	rs1260326	rs1260326	chr2:27730940	C/T	rs780093	chr2:27742603	C/T	0.908	0.955	1	Triglycerides in very large VLDL	Kettunen J	27005778	2016	European	Kettunen J	C	C/T	0.6362	-0.08848	0.01012	4.36e-18	21546	12
	rs1260326	rs1260326	chr2:27730940	C/T	rs780094	chr2:27741237	C/T	0.912	0.955	1	Triglycerides in medium VLDL	Kettunen J	27005778	2016	European	Kettunen J	C	C/T	0.6336	-0.08915	0.01022	4.9e-18	21241	12
	rs1260326	rs1260326	chr2:27730940	C/T	rs780094	chr2:27741237	C/T	0.912	0.955	1	MonoLunsaturated fatty acids	Kettunen J	27005778	2016	European	Kettunen J	C	C/T	0.6302	-0.1097	0.01257	5.68e-18	13535	10
	rs1260326	rs1260326	chr2:27730940	C/T	rs1260326	chr2:27730940	C/T	1	1	0	Total lipids in small VLDL	Kettunen J	27005778	2016	European	Kettunen J	C	C/T	0.6366	-0.09288	0.01062	6.64e-18	19273	11
	rs1260326	rs1260326	chr2:27730940	C/T	rs780093	chr2:27742603	C/T	0.908	0.955	1	Total cholesterol in medium VLDL	Kettunen J	27005778	2016	European	Kettunen J	C	C/T	0.6362	-0.08827	0.01014	7.13e-18	21549	12
	rs1260326	rs1260326	chr2:27730940	C/T	rs4665972	chr2:27598097	C/T	0.869	0.942	1	Triglycerides in chylomicrons and extremely large VLDL	Kettunen J	27005778	2016	European	Kettunen J	C	C/T	0.6087	-0.08923	0.01031	7.33e-18	21537	12
	rs33951980	rs33951980	chr7:73029437	C/T	rs13234131	chr7:73025975	A/G	0.962	1	1	Triglycerides in medium VLDL	Kettunen J	27005778	2016	European	Kettunen J	A	A/G	0.8744	0.1323	0.01526	8.12e-18	21236	12
	rs33951980	rs33951980	chr7:73029437	C/T	rs13234378	chr7:73026151	A/T	0.962	1	1	Triglycerides in medium VLDL	Kettunen J	27005778	2016	European	Kettunen J	A	A/T	0.8751	0.1324	0.01528	8.18e-18	21237	12
	rs33951980	rs33951980	chr7:73029437	C/T	rs13246993	chr7:73022746	G/A	0.962	1	1	Triglycerides in medium VLDL	Kettunen J	27005778	2016	European	Kettunen J	G	G/A	0.8741	0.1321	0.01525	8.26e-18	21235	12
	rs1260326	rs1260326	chr2:27730940	C/T	rs1260326	chr2:27730940	C/T	1	1	0	Total cholesterol in large VLDL	Kettunen J	27005778	2016	European	Kettunen J	C	C/T	0.6392	-0.08912	0.01029	8.49e-18	21235	12
	rs33951980	rs33951980	chr7:73029437	C/T	rs3812316	chr7:73020337	C/G	0.953	0.99	1	Triglycerides in medium VLDL	Kettunen J	27005778	2016	European	Kettunen J	C	C/G	0.8753	0.1319	0.01524	8.91e-18	21235	12
	rs1260326	rs1260326	chr2:27730940	C/T	rs1260326	chr2:27730940	C/T	1	1	0	Isoleucine	Kettunen J	27005778	2016	European	Kettunen J	C	C/T	0.6388	-0.08568	0.009934	9.75e-18	22549	13
	rs1260326	rs1260326	chr2:27730940	C/T	rs780093	chr2:27742603	C/T	0.908	0.955	1	Triglycerides in medium VLDL	Kettunen J	27005778	2016	European	Kettunen J	C	C/T	0.6366	-0.08825	0.01021	1e-17	21239	12
	rs33951980	rs33951980	chr7:73029437	C/T	rs33951980	chr7:73029437	C/T	1	1	0	Triglycerides in medium VLDL	Kettunen J	27005778	2016	European	Kettunen J	C	C/T	0.8739	0.1319	0.01526	1.01e-17	21235	12
	rs33951980	rs33951980	chr7:73029437	C/T	rs13240065	chr7:73015369	G/A	0.944	0.972	1	Triglycerides in medium VLDL	Kettunen J	27005778	2016	European	Kettunen J	G	G/A	0.8748	0.1312	0.01519	1.05e-17	21237	12
	rs33951980	rs33951980	chr7:73029437	C/T	rs71556736	chr7:73034929	C/T	0.991	1	1	Triglycerides in medium VLDL	Kettunen J	27005778	2016	European	Kettunen J	C	C/T	0.8722	0.1315	0.01524	1.11e-17	21239	12
	rs1260326	rs1260326	chr2:27730940	C/T	rs780093	chr2:27742603	C/T	0.908	0.955	1	Triglycerides in chylomicrons and extremely large VLDL	Kettunen J	27005778	2016	European	Kettunen J	C	C/T	0.6362	-0.08726	0.01014	1.12e-17	21538	12
	rs1260326	rs1260326	chr2:27730940	C/T	rs780093	chr2:27742603	C/T	0.908	0.955	1	Concentration of large VLDL particles	Kettunen J	27005778	2016	European	Kettunen J	C	C/T	0.6337	-0.09269	0.01068	1.3e-17	18958	11
	rs1260326	rs1260326	chr2:27730940	C/T	rs4665972	chr2:27598097	C/T	0.869	0.942	1	Concentration of large VLDL particles	Kettunen J	27005778	2016	European	Kettunen J	C	C/T	0.6036	-0.09327	0.01076	1.42e-17	18957	11
	rs33951980	rs33951980	chr7:73029437	C/T	rs34060476	chr7:73037956	A/G	0.963	1	1	Triglycerides in medium VLDL	Kettunen J	27005778	2016	European	Kettunen J	A	A/G	0.8733	0.1313	0.01529	1.58e-17	21240	12
	rs33951980	rs33951980	chr7:73029437	C/T	rs34062580	chr7:73033559	G/A	0.991	1	1	Triglycerides in medium VLDL	Kettunen J	27005778	2016	European	Kettunen J	G	G/A	0.8734	0.1312	0.01528	1.63e-17	21236	12
	rs33951980	rs33951980	chr7:73029437	C/T	rs13229619	chr7:73030175	G/A	0.972	0.99	1	Triglycerides in medium VLDL	Kettunen J	27005778	2016	European	Kettunen J	G	G/A	0.8734	0.131	0.01527	1.69e-17	21239	12
	rs1260326	rs1260326	chr2:27730940	C/T	rs4665972	chr2:27598097	C/T	0.869	0.942	1	Triglycerides in medium VLDL	Kettunen J	27005778	2016	European	Kettunen J	C	C/T	0.609	-0.08894	0.01039	2.03e-17	21238	12
	rs1260326	rs1260326	chr2:27730940	C/T	rs780094	chr2:27741237	C/T	0.912	0.955	1	Phospholipids in small VLDL	Kettunen J	27005778	2016	European	Kettunen J	C	C/T	0.6332	-0.08714	0.01013	2.09e-17	21551	12
	rs1260326	rs1260326	chr2:27730940	C/T	rs780094	chr2:27741237	C/T	0.912	0.955	1	Concentration of large VLDL particles	Kettunen J	27005778	2016	European	Kettunen J	C	C/T	0.6309	-0.09187	0.01067	2.37e-17	18960	11
	rs1260326	rs1260326	chr2:27730940	C/T	rs4665972	chr2:27598097	C/T	0.869	0.942	1	Total cholesterol in medium VLDL	Kettunen J	27005778	2016	European	Kettunen J	C	C/T	0.6087	-0.08819	0.01032	2.61e-17	21548	12
	rs1260326	rs1260326	chr2:27730940	C/T	rs4665972	chr2:27598097	C/T	0.869	0.942	1	MonoLunsaturated fatty acids	Kettunen J	27005778	2016	European	Kettunen J	C	C/T	0.601	-0.1085	0.0127	2.66e-17	13530	10
	rs1260326	rs1260326	chr2:27730940	C/T	rs780093	chr2:27742603	C/T	0.908	0.955	1	VLDL diameter	Kettunen J	27005778	2016	European	Kettunen J	C	C/T	0.6333	-0.09016	0.01056	2.79e-17	19271	11
	rs1260326	rs1260326	chr2:27730940	C/T	rs4665972	chr2:27598097	C/T	0.869	0.942	1	Triglycerides in large VLDL	Kettunen J	27005778	2016	European	Kettunen J	C	C/T	0.609	-0.08852	0.01038	2.82e-17	21236	12
	rs1260326	rs1260326	chr2:27730940	C/T	rs4665972	chr2:27598097	C/T	0.869	0.942	1	Free cholesterol in large VLDL	Kettunen J	27005778	2016	European	Kettunen J	C	C/T	0.609	-0.08857	0.01039	2.84e-17	21235	12
	rs1260326	rs1260326	chr2:27730940	C/T	rs4665972	chr2:27598097	C/T	0.869	0.942	1	Concentration of medium VLDL particles	Kettunen J	27005778	2016	European	Kettunen J	C	C/T	0.6034	-0.09134	0.01067	3.09e-17	19270	11
	rs1260326	rs1260326	chr2:27730940	C/T	rs780094	chr2:27741237	C/T	0.912	0.955	1	Phospholipids in very large VLDL	Kettunen J	27005778	2016	European	Kettunen J	C	C/T	0.6336	-0.08696	0.01022	3.46e-17	21237	12
	rs1260326	rs1260326	chr2:27730940	C/T	rs780094	chr2:27741237	C/T	0.912	0.955	1	VLDL diameter	Kettunen J	27005778	2016	European	Kettunen J	C	C/T	0.6305	-0.08965	0.01054	3.88e-17	19273	11
	rs1260326	rs1260326	chr2:27730940	C/T	rs780094	chr2:27741237	C/T	0.912	0.955	1	OmegaL7 and L9 and saturated fatty acids	Kettunen J	27005778	2016	European	Kettunen J	C	C/T	0.6301	-0.1065	0.01258	3.98e-17	13506	10
	rs1260326	rs1260326	chr2:27730940	C/T	rs780094	chr2:27741237	C/T	0.912	0.955	1	Total lipids in medium VLDL	Kettunen J	27005778	2016	European	Kettunen J	C	C/T	0.6305	-0.08977	0.01056	4.21e-17	19273	11
	rs1260326	rs1260326	chr2:27730940	C/T	rs1260326	chr2:27730940	C/T	1	1	0	Free cholesterol in small VLDL	Kettunen J	27005778	2016	European	Kettunen J	C	C/T	0.6389	-0.08667	0.01019	4.51e-17	21559	12
	rs1260326	rs1260326	chr2:27730940	C/T	rs780093	chr2:27742603	C/T	0.908	0.955	1	MonoLunsaturated fatty acids	Kettunen J	27005778	2016	European	Kettunen J	C	C/T	0.6324	-0.1067	0.01259	4.64e-17	13532	10
	rs1260326	rs1260326	chr2:27730940	C/T	rs780093	chr2:27742603	C/T	0.908	0.955	1	Phospholipids in small VLDL	Kettunen J	27005778	2016	European	Kettunen J	C	C/T	0.6362	-0.08621	0.01014	4.68e-17	21549	12
	rs1260326	rs1260326	chr2:27730940	C/T	rs780093	chr2:27742603	C/T	0.908	0.955	1	Phospholipids in very large VLDL	Kettunen J	27005778	2016	European	Kettunen J	C	C/T	0.6366	-0.08656	0.01022	4.88e-17	21235	12
	rs1260326	rs1260326	chr2:27730940	C/T	rs4665972	chr2:27598097	C/T	0.869	0.942	1	VLDL diameter	Kettunen J	27005778	2016	European	Kettunen J	C	C/T	0.6034	-0.08979	0.01064	6.58e-17	19270	11
	rs1260326	rs1260326	chr2:27730940	C/T	rs780094	chr2:27741237	C/T	0.912	0.955	1	Concentration of medium VLDL particles	Kettunen J	27005778	2016	European	Kettunen J	C	C/T	0.6305	-0.08936	0.01057	7.84e-17	19273	11
	rs1260326	rs1260326	chr2:27730940	C/T	rs780094	chr2:27741237	C/T	0.912	0.955	1	Total fatty acids	Kettunen J	27005778	2016	European	Kettunen J	C	C/T	0.6301	-0.1053	0.01259	8.18e-17	13505	10
	rs1260326	rs1260326	chr2:27730940	C/T	rs780093	chr2:27742603	C/T	0.908	0.955	1	Total cholesterol in large VLDL	Kettunen J	27005778	2016	European	Kettunen J	C	C/T	0.6366	-0.08575	0.01022	8.48e-17	21233	12
	rs1260326	rs1260326	chr2:27730940	C/T	rs780093	chr2:27742603	C/T	0.908	0.955	1	Concentration of medium VLDL particles	Kettunen J	27005778	2016	European	Kettunen J	C	C/T	0.6333	-0.08912	0.01059	1.04e-16	19271	11
	rs1260326	rs1260326	chr2:27730940	C/T	rs780094	chr2:27741237	C/T	0.912	0.955	1	Total cholesterol in large VLDL	Kettunen J	27005778	2016	European	Kettunen J	C	C/T	0.6336	-0.08552	0.01022	1.07e-16	21235	12
	rs1260326	rs1260326	chr2:27730940	C/T	rs780093	chr2:27742603	C/T	0.908	0.955	1	Total lipids in medium VLDL	Kettunen J	27005778	2016	European	Kettunen J	C	C/T	0.6333	-0.08851	0.01058	1.28e-16	19271	11
	rs1260326	rs1260326	chr2:27730940	C/T	rs4665972	chr2:27598097	C/T	0.869	0.942	1	Total lipids in medium VLDL	Kettunen J	27005778	2016	European	Kettunen J	C	C/T	0.6034	-0.08915	0.01066	1.31e-16	19270	11
	rs1260326	rs1260326	chr2:27730940	C/T	rs780094	chr2:27741237	C/T	0.912	0.955	1	Concentration of small VLDL particles	Kettunen J	27005778	2016	European	Kettunen J	C	C/T	0.6305	-0.08855	0.01057	1.46e-16	19273	11
	rs1260326	rs1260326	chr2:27730940	C/T	rs4665972	chr2:27598097	C/T	0.869	0.942	1	Isoleucine	Kettunen J	27005778	2016	European	Kettunen J	C	C/T	0.6088	-0.07988	0.009647	1.81e-16	24773	14
	rs1260326	rs1260326	chr2:27730940	C/T	rs4665972	chr2:27598097	C/T	0.869	0.942	1	Triglycerides in very large VLDL	Kettunen J	27005778	2016	European	Kettunen J	C	C/T	0.6087	-0.08538	0.01029	1.92e-16	21545	12
	rs1260326	rs1260326	chr2:27730940	C/T	rs1260326	chr2:27730940	C/T	1	1	0	Cholesterol esters in medium VLDL	Kettunen J	27005778	2016	European	Kettunen J	C	C/T	0.6366	-0.08846	0.01062	2.16e-16	19273	11
	rs1260326	rs1260326	chr2:27730940	C/T	rs4665972	chr2:27598097	C/T	0.869	0.942	1	OmegaL7 and L9 and saturated fatty acids	Kettunen J	27005778	2016	European	Kettunen J	C	C/T	0.6009	-0.1052	0.01273	2.2e-16	13504	10
	rs1260326	rs1260326	chr2:27730940	C/T	rs780093	chr2:27742603	C/T	0.908	0.955	1	OmegaL7 and L9 and saturated fatty acids	Kettunen J	27005778	2016	European	Kettunen J	C	C/T	0.6323	-0.1041	0.01262	2.47e-16	13503	10
	rs33951980	rs33951980	chr7:73029437	C/T	rs13240065	chr7:73015369	G/A	0.944	0.972	1	Free cholesterol in medium VLDL	Kettunen J	27005778	2016	European	Kettunen J	G	G/A	0.8748	0.1257	0.01519	2.5e-16	21236	12
	rs33951980	rs33951980	chr7:73029437	C/T	rs13234378	chr7:73026151	A/T	0.962	1	1	Total cholesterol in large VLDL	Kettunen J	27005778	2016	European	Kettunen J	A	A/T	0.8751	0.1259	0.01528	3.02e-16	21231	12
	rs33951980	rs33951980	chr7:73029437	C/T	rs13234131	chr7:73025975	A/G	0.962	1	1	Total cholesterol in large VLDL	Kettunen J	27005778	2016	European	Kettunen J	A	A/G	0.8744	0.1258	0.01527	3.07e-16	21230	12
	rs33951980	rs33951980	chr7:73029437	C/T	rs13246993	chr7:73022746	G/A	0.962	1	1	Total cholesterol in large VLDL	Kettunen J	27005778	2016	European	Kettunen J	G	G/A	0.8741	0.1256	0.01525	3.13e-16	21229	12
	rs33951980	rs33951980	chr7:73029437	C/T	rs33951980	chr7:73029437	C/T	1	1	0	Total cholesterol in large VLDL	Kettunen J	27005778	2016	European	Kettunen J	C	C/T	0.8739	0.1256	0.01527	3.42e-16	21229	12
	rs1260326	rs1260326	chr2:27730940	C/T	rs4665972	chr2:27598097	C/T	0.869	0.942	1	Phospholipids in small VLDL	Kettunen J	27005778	2016	European	Kettunen J	C	C/T	0.6087	-0.08524	0.01032	3.43e-16	21548	12
	rs33951980	rs33951980	chr7:73029437	C/T	rs3812316	chr7:73020337	C/G	0.953	0.99	1	Free cholesterol in medium VLDL	Kettunen J	27005778	2016	European	Kettunen J	C	C/G	0.8753	0.1255	0.01524	3.5e-16	21234	12
	rs33951980	rs33951980	chr7:73029437	C/T	rs3812316	chr7:73020337	C/G	0.953	0.99	1	Total cholesterol in large VLDL	Kettunen J	27005778	2016	European	Kettunen J	C	C/G	0.8753	0.1252	0.01525	3.91e-16	21229	12
	rs1260326	rs1260326	chr2:27730940	C/T	rs780093	chr2:27742603	C/T	0.908	0.955	1	Isoleucine	Kettunen J	27005778	2016	European	Kettunen J	C	C/T	0.637	-0.07738	0.009459	4.11e-16	24774	14
	rs1260326	rs1260326	chr2:27730940	C/T	rs1260326	chr2:27730940	C/T	1	1	0	Concentration of very large VLDL particles	Kettunen J	27005778	2016	European	Kettunen J	C	C/T	0.6368	-0.08788	0.01071	4.17e-16	18960	11
	rs33951980	rs33951980	chr7:73029437	C/T	rs13246993	chr7:73022746	G/A	0.962	1	1	Free cholesterol in medium VLDL	Kettunen J	27005778	2016	European	Kettunen J	G	G/A	0.8741	0.1252	0.01524	4.18e-16	21234	12
	rs1260326	rs1260326	chr2:27730940	C/T	rs4665972	chr2:27598097	C/T	0.869	0.942	1	Concentration of small VLDL particles	Kettunen J	27005778	2016	European	Kettunen J	C	C/T	0.6034	-0.08799	0.01066	4.2e-16	19270	11
	rs1260326	rs1260326	chr2:27730940	C/T	rs780093	chr2:27742603	C/T	0.908	0.955	1	Concentration of small VLDL particles	Kettunen J	27005778	2016	European	Kettunen J	C	C/T	0.6333	-0.08721	0.01058	4.57e-16	19271	11
	rs33951980	rs33951980	chr7:73029437	C/T	rs13234378	chr7:73026151	A/T	0.962	1	1	Free cholesterol in medium VLDL	Kettunen J	27005778	2016	European	Kettunen J	A	A/T	0.8751	0.1253	0.01528	4.59e-16	21236	12
	rs33951980	rs33951980	chr7:73029437	C/T	rs3812316	chr7:73020337	C/G	0.953	0.99	1	Free cholesterol in large VLDL	Kettunen J	27005778	2016	European	Kettunen J	C	C/G	0.8753	0.1248	0.01524	4.73e-16	21232	12
	rs1260326	rs1260326	chr2:27730940	C/T	rs1260326	chr2:27730940	C/T	1	1	0	Total lipids in large VLDL	Kettunen J	27005778	2016	European	Kettunen J	C	C/T	0.6368	-0.08769	0.01071	4.9e-16	18960	11
	rs1260326	rs1260326	chr2:27730940	C/T	rs780094	chr2:27741237	C/T	0.912	0.955	1	Isoleucine	Kettunen J	27005778	2016	European	Kettunen J	C	C/T	0.6344	-0.08071	0.009895	5e-16	22549	13
	rs33951980	rs33951980	chr7:73029437	C/T	rs13240065	chr7:73015369	G/A	0.944	0.972	1	Total cholesterol in large VLDL	Kettunen J	27005778	2016	European	Kettunen J	G	G/A	0.8748	0.1242	0.0152	5.13e-16	21231	12
	rs1260326	rs1260326	chr2:27730940	C/T	rs780093	chr2:27742603	C/T	0.908	0.955	1	Total fatty acids	Kettunen J	27005778	2016	European	Kettunen J	C	C/T	0.6323	-0.1028	0.01262	5.18e-16	13502	10
	rs1260326	rs1260326	chr2:27730940	C/T	rs1260326	chr2:27730940	C/T	1	1	0	Glycoprotein acetyls mainly a1Lacid glycoprotein	Kettunen J	27005778	2016	European	Kettunen J	C	C/T	0.6366	-0.08716	0.01062	5.24e-16	19270	11
	rs33951980	rs33951980	chr7:73029437	C/T	rs13246993	chr7:73022746	G/A	0.962	1	1	Free cholesterol in large VLDL	Kettunen J	27005778	2016	European	Kettunen J	G	G/A	0.8741	0.1246	0.01525	5.38e-16	21232	12
	rs1260326	rs1260326	chr2:27730940	C/T	rs1260326	chr2:27730940	C/T	1	1	0	Concentration of small HDL particles	Kettunen J	27005778	2016	European	Kettunen J	C	C/T	0.6366	-0.08658	0.01061	5.41e-16	19273	11
	rs1260326	rs1260326	chr2:27730940	C/T	rs4665972	chr2:27598097	C/T	0.869	0.942	1	Total fatty acids	Kettunen J	27005778	2016	European	Kettunen J	C	C/T	0.6009	-0.1036	0.01274	5.46e-16	13503	10
	rs1260326	rs1260326	chr2:27730940	C/T	rs1260326	chr2:27730940	C/T	1	1	0	Pyruvate	Kettunen J	27005778	2016	European	Kettunen J	C	C/T	0.6388	-0.0808	0.009967	5.47e-16	22529	13
	rs33951980	rs33951980	chr7:73029437	C/T	rs13234378	chr7:73026151	A/T	0.962	1	1	Free cholesterol in large VLDL	Kettunen J	27005778	2016	European	Kettunen J	A	A/T	0.8751	0.1248	0.01528	5.55e-16	21234	12
	rs1260326	rs1260326	chr2:27730940	C/T	rs11127048	chr2:27752463	A/G	0.82	0.913	1	Alanine	Kettunen J	27005778	2016	European	Kettunen J	A	A/G	0.5816	-0.08004	0.009877	5.61e-16	24795	14
	rs33951980	rs33951980	chr7:73029437	C/T	rs13234131	chr7:73025975	A/G	0.962	1	1	Free cholesterol in medium VLDL	Kettunen J	27005778	2016	European	Kettunen J	A	A/G	0.8744	0.1247	0.01526	5.88e-16	21235	12
	rs33951980	rs33951980	chr7:73029437	C/T	rs13234131	chr7:73025975	A/G	0.962	1	1	Free cholesterol in large VLDL	Kettunen J	27005778	2016	European	Kettunen J	A	A/G	0.8744	0.1246	0.01526	5.98e-16	21233	12
	rs33951980	rs33951980	chr7:73029437	C/T	rs13240065	chr7:73015369	G/A	0.944	0.972	1	Free cholesterol in large VLDL	Kettunen J	27005778	2016	European	Kettunen J	G	G/A	0.8748	0.124	0.01519	5.99e-16	21234	12
	rs33951980	rs33951980	chr7:73029437	C/T	rs33951980	chr7:73029437	C/T	1	1	0	Free cholesterol in large VLDL	Kettunen J	27005778	2016	European	Kettunen J	C	C/T	0.8739	0.1245	0.01527	6.21e-16	21232	12
	rs33951980	rs33951980	chr7:73029437	C/T	rs13246993	chr7:73022746	G/A	0.962	1	1	Triglycerides in large VLDL	Kettunen J	27005778	2016	European	Kettunen J	G	G/A	0.8741	0.1241	0.01524	6.82e-16	21233	12
	rs33951980	rs33951980	chr7:73029437	C/T	rs33951980	chr7:73029437	C/T	1	1	0	Free cholesterol in medium VLDL	Kettunen J	27005778	2016	European	Kettunen J	C	C/T	0.8739	0.1244	0.01526	6.99e-16	21234	12
	rs33951980	rs33951980	chr7:73029437	C/T	rs13234131	chr7:73025975	A/G	0.962	1	1	Triglycerides in large VLDL	Kettunen J	27005778	2016	European	Kettunen J	A	A/G	0.8744	0.1241	0.01526	7.43e-16	21234	12
	rs1260326	rs1260326	chr2:27730940	C/T	rs780094	chr2:27741237	C/T	0.912	0.955	1	Total lipids in small VLDL	Kettunen J	27005778	2016	European	Kettunen J	C	C/T	0.6305	-0.08643	0.01056	7.58e-16	19273	11
	rs33951980	rs33951980	chr7:73029437	C/T	rs13240065	chr7:73015369	G/A	0.944	0.972	1	Triglycerides in large VLDL	Kettunen J	27005778	2016	European	Kettunen J	G	G/A	0.8748	0.1234	0.01519	7.91e-16	21235	12
	rs33951980	rs33951980	chr7:73029437	C/T	rs71556736	chr7:73034929	C/T	0.991	1	1	Total cholesterol in large VLDL	Kettunen J	27005778	2016	European	Kettunen J	C	C/T	0.8722	0.1238	0.01525	7.94e-16	21233	12
	rs33951980	rs33951980	chr7:73029437	C/T	rs34060476	chr7:73037956	A/G	0.963	1	1	Total cholesterol in large VLDL	Kettunen J	27005778	2016	European	Kettunen J	A	A/G	0.8734	0.1242	0.01529	8.11e-16	21234	12
	rs33951980	rs33951980	chr7:73029437	C/T	rs34062580	chr7:73033559	G/A	0.991	1	1	Total cholesterol in large VLDL	Kettunen J	27005778	2016	European	Kettunen J	G	G/A	0.8734	0.1241	0.01529	8.18e-16	21230	12
	rs33951980	rs33951980	chr7:73029437	C/T	rs3812316	chr7:73020337	C/G	0.953	0.99	1	Triglycerides in large VLDL	Kettunen J	27005778	2016	European	Kettunen J	C	C/G	0.8753	0.1237	0.01524	8.18e-16	21233	12
	rs33951980	rs33951980	chr7:73029437	C/T	rs13234378	chr7:73026151	A/T	0.962	1	1	Triglycerides in large VLDL	Kettunen J	27005778	2016	European	Kettunen J	A	A/T	0.8751	0.124	0.01528	8.26e-16	21235	12
	rs33951980	rs33951980	chr7:73029437	C/T	rs13229619	chr7:73030175	G/A	0.972	0.99	1	Total cholesterol in large VLDL	Kettunen J	27005778	2016	European	Kettunen J	G	G/A	0.8734	0.124	0.01528	8.35e-16	21233	12
	rs33951980	rs33951980	chr7:73029437	C/T	rs33951980	chr7:73029437	C/T	1	1	0	Triglycerides in large VLDL	Kettunen J	27005778	2016	European	Kettunen J	C	C/T	0.8739	0.1235	0.01526	1.03e-15	21233	12
	rs1260326	rs1260326	chr2:27730940	C/T	rs1260326	chr2:27730940	C/T	1	1	0	Leucine	Kettunen J	27005778	2016	European	Kettunen J	C	C/T	0.639	-0.07981	0.009937	1.07e-15	22500	13
	rs1260326	rs1260326	chr2:27730940	C/T	rs1260326	chr2:27730940	C/T	1	1	0	Phospholipids in chylomicrons and extremely large VLDL	Kettunen J	27005778	2016	European	Kettunen J	C	C/T	0.6389	-0.08249	0.01023	1.09e-15	21542	12
	rs33951980	rs33951980	chr7:73029437	C/T	rs13246993	chr7:73022746	G/A	0.962	1	1	Concentration of medium VLDL particles	Kettunen J	27005778	2016	European	Kettunen J	G	G/A	0.8767	0.1276	0.01575	1.37e-15	19268	11
	rs33951980	rs33951980	chr7:73029437	C/T	rs34060476	chr7:73037956	A/G	0.963	1	1	Free cholesterol in large VLDL	Kettunen J	27005778	2016	European	Kettunen J	A	A/G	0.8733	0.1232	0.01529	1.4e-15	21237	12
	rs33951980	rs33951980	chr7:73029437	C/T	rs71556736	chr7:73034929	C/T	0.991	1	1	Free cholesterol in medium VLDL	Kettunen J	27005778	2016	European	Kettunen J	C	C/T	0.8722	0.1229	0.01524	1.42e-15	21238	12
	rs33951980	rs33951980	chr7:73029437	C/T	rs34062580	chr7:73033559	G/A	0.991	1	1	Free cholesterol in large VLDL	Kettunen J	27005778	2016	European	Kettunen J	G	G/A	0.8734	0.1231	0.01528	1.44e-15	21233	12
	rs33951980	rs33951980	chr7:73029437	C/T	rs13240065	chr7:73015369	G/A	0.944	0.972	1	Concentration of medium VLDL particles	Kettunen J	27005778	2016	European	Kettunen J	G	G/A	0.8764	0.127	0.01568	1.44e-15	19268	11
	rs33951980	rs33951980	chr7:73029437	C/T	rs71556736	chr7:73034929	C/T	0.991	1	1	Free cholesterol in large VLDL	Kettunen J	27005778	2016	European	Kettunen J	C	C/T	0.8722	0.1227	0.01524	1.49e-15	21236	12
	rs33951980	rs33951980	chr7:73029437	C/T	rs13229619	chr7:73030175	G/A	0.972	0.99	1	Free cholesterol in large VLDL	Kettunen J	27005778	2016	European	Kettunen J	G	G/A	0.8734	0.1229	0.01528	1.5e-15	21236	12
	rs33951980	rs33951980	chr7:73029437	C/T	rs71556736	chr7:73034929	C/T	0.991	1	1	Triglycerides in large VLDL	Kettunen J	27005778	2016	European	Kettunen J	C	C/T	0.8722	0.1226	0.01524	1.51e-15	21237	12
	rs1260326	rs1260326	chr2:27730940	C/T	rs4665972	chr2:27598097	C/T	0.869	0.942	1	Phospholipids in very large VLDL	Kettunen J	27005778	2016	European	Kettunen J	C	C/T	0.609	-0.0837	0.0104	1.52e-15	21234	12
	rs33951980	rs33951980	chr7:73029437	C/T	rs34062580	chr7:73033559	G/A	0.991	1	1	Triglycerides in large VLDL	Kettunen J	27005778	2016	European	Kettunen J	G	G/A	0.8734	0.1228	0.01528	1.55e-15	21234	12
	rs33951980	rs33951980	chr7:73029437	C/T	rs34060476	chr7:73037956	A/G	0.963	1	1	Triglycerides in large VLDL	Kettunen J	27005778	2016	European	Kettunen J	A	A/G	0.8733	0.1229	0.01528	1.56e-15	21238	12
	rs33951980	rs33951980	chr7:73029437	C/T	rs13229619	chr7:73030175	G/A	0.972	0.99	1	Triglycerides in large VLDL	Kettunen J	27005778	2016	European	Kettunen J	G	G/A	0.8734	0.1227	0.01527	1.59e-15	21237	12
	rs33951980	rs33951980	chr7:73029437	C/T	rs13229619	chr7:73030175	G/A	0.972	0.99	1	Free cholesterol in medium VLDL	Kettunen J	27005778	2016	European	Kettunen J	G	G/A	0.8734	0.1228	0.01527	1.63e-15	21238	12
	rs33951980	rs33951980	chr7:73029437	C/T	rs34062580	chr7:73033559	G/A	0.991	1	1	Free cholesterol in medium VLDL	Kettunen J	27005778	2016	European	Kettunen J	G	G/A	0.8734	0.1229	0.01528	1.66e-15	21235	12
	rs33951980	rs33951980	chr7:73029437	C/T	rs34060476	chr7:73037956	A/G	0.963	1	1	Free cholesterol in medium VLDL	Kettunen J	27005778	2016	European	Kettunen J	A	A/G	0.8733	0.1228	0.01528	1.77e-15	21239	12
	rs1260326	rs1260326	chr2:27730940	C/T	rs780093	chr2:27742603	C/T	0.908	0.955	1	Total lipids in small VLDL	Kettunen J	27005778	2016	European	Kettunen J	C	C/T	0.6333	-0.0853	0.01058	1.98e-15	19271	11
	rs33951980	rs33951980	chr7:73029437	C/T	rs3812316	chr7:73020337	C/G	0.953	0.99	1	Concentration of medium VLDL particles	Kettunen J	27005778	2016	European	Kettunen J	C	C/G	0.8766	0.1266	0.01572	2.01e-15	19268	11
	rs33951980	rs33951980	chr7:73029437	C/T	rs13234131	chr7:73025975	A/G	0.962	1	1	Concentration of medium VLDL particles	Kettunen J	27005778	2016	European	Kettunen J	A	A/G	0.8756	0.1267	0.01574	2.11e-15	19267	11
	rs1260326	rs1260326	chr2:27730940	C/T	rs4665972	chr2:27598097	C/T	0.869	0.942	1	Total lipids in small VLDL	Kettunen J	27005778	2016	European	Kettunen J	C	C/T	0.6034	-0.08585	0.01066	2.15e-15	19270	11
	rs33951980	rs33951980	chr7:73029437	C/T	rs13234378	chr7:73026151	A/T	0.962	1	1	Concentration of medium VLDL particles	Kettunen J	27005778	2016	European	Kettunen J	A	A/T	0.8763	0.1267	0.01576	2.22e-15	19269	11
	rs1260326	rs1260326	chr2:27730940	C/T	rs1260326	chr2:27730940	C/T	1	1	0	Concentration of chylomicrons and extremely large VLDL particles	Kettunen J	27005778	2016	European	Kettunen J	C	C/T	0.6368	-0.08606	0.01078	2.64e-15	18960	11
	rs33951980	rs33951980	chr7:73029437	C/T	rs13240065	chr7:73015369	G/A	0.944	0.972	1	Phospholipids in medium VLDL	Kettunen J	27005778	2016	European	Kettunen J	G	G/A	0.8748	0.1213	0.01521	2.85e-15	21236	12
	rs33951980	rs33951980	chr7:73029437	C/T	rs33951980	chr7:73029437	C/T	1	1	0	Concentration of medium VLDL particles	Kettunen J	27005778	2016	European	Kettunen J	C	C/T	0.876	0.1263	0.01577	2.92e-15	19268	11
	rs33951980	rs33951980	chr7:73029437	C/T	rs71556736	chr7:73034929	C/T	0.991	1	1	Concentration of medium VLDL particles	Kettunen J	27005778	2016	European	Kettunen J	C	C/T	0.8749	0.126	0.01576	3.14e-15	19271	11
	rs1260326	rs1260326	chr2:27730940	C/T	rs780094	chr2:27741237	C/T	0.912	0.955	1	Free cholesterol in small VLDL	Kettunen J	27005778	2016	European	Kettunen J	C	C/T	0.6332	-0.0808	0.01013	3.32e-15	21559	12
	rs1260326	rs1260326	chr2:27730940	C/T	rs780094	chr2:27741237	C/T	0.912	0.955	1	Pyruvate	Kettunen J	27005778	2016	European	Kettunen J	C	C/T	0.6344	-0.0782	0.009921	3.38e-15	22529	13
	rs33951980	rs33951980	chr7:73029437	C/T	rs3812316	chr7:73020337	C/G	0.953	0.99	1	Phospholipids in medium VLDL	Kettunen J	27005778	2016	European	Kettunen J	C	C/G	0.8753	0.1213	0.01526	3.48e-15	21234	12
	rs33951980	rs33951980	chr7:73029437	C/T	rs13246993	chr7:73022746	G/A	0.962	1	1	Phospholipids in medium VLDL	Kettunen J	27005778	2016	European	Kettunen J	G	G/A	0.8741	0.1214	0.01526	3.51e-15	21234	12
	rs33951980	rs33951980	chr7:73029437	C/T	rs13229619	chr7:73030175	G/A	0.972	0.99	1	Concentration of medium VLDL particles	Kettunen J	27005778	2016	European	Kettunen J	G	G/A	0.8762	0.1258	0.01579	3.87e-15	19271	11
	rs33951980	rs33951980	chr7:73029437	C/T	rs13234378	chr7:73026151	A/T	0.962	1	1	Phospholipids in medium VLDL	Kettunen J	27005778	2016	European	Kettunen J	A	A/T	0.8751	0.1214	0.01529	3.88e-15	21236	12
	rs33951980	rs33951980	chr7:73029437	C/T	rs34062580	chr7:73033559	G/A	0.991	1	1	Concentration of medium VLDL particles	Kettunen J	27005778	2016	European	Kettunen J	G	G/A	0.8762	0.1259	0.0158	3.99e-15	19268	11
	rs33951980	rs33951980	chr7:73029437	C/T	rs34060476	chr7:73037956	A/G	0.963	1	1	Concentration of medium VLDL particles	Kettunen J	27005778	2016	European	Kettunen J	A	A/G	0.8761	0.1258	0.01581	4.21e-15	19272	11
	rs1260326	rs1260326	chr2:27730940	C/T	rs780094	chr2:27741237	C/T	0.912	0.955	1	Total lipids in large VLDL	Kettunen J	27005778	2016	European	Kettunen J	C	C/T	0.6309	-0.08435	0.01066	4.4e-15	18960	11
	rs1260326	rs1260326	chr2:27730940	C/T	rs1260326	chr2:27730940	C/T	1	1	0	Total lipids in very large VLDL	Kettunen J	27005778	2016	European	Kettunen J	C	C/T	0.6366	-0.08411	0.01062	4.43e-15	19273	11
	rs33951980	rs33951980	chr7:73029437	C/T	rs13234131	chr7:73025975	A/G	0.962	1	1	Phospholipids in medium VLDL	Kettunen J	27005778	2016	European	Kettunen J	A	A/G	0.8744	0.121	0.01528	4.54e-15	21235	12
	rs1260326	rs1260326	chr2:27730940	C/T	rs4665972	chr2:27598097	C/T	0.869	0.942	1	Total cholesterol in large VLDL	Kettunen J	27005778	2016	European	Kettunen J	C	C/T	0.609	-0.08209	0.01039	4.7e-15	21232	12
	rs1260326	rs1260326	chr2:27730940	C/T	rs11127048	chr2:27752463	A/G	0.82	0.913	1	Serum total triglycerides	Kettunen J	27005778	2016	European	Kettunen J	A	A/G	0.5763	-0.08299	0.01047	4.72e-15	21544	12
	rs1260326	rs1260326	chr2:27730940	C/T	rs780093	chr2:27742603	C/T	0.908	0.955	1	Total lipids in large VLDL	Kettunen J	27005778	2016	European	Kettunen J	C	C/T	0.6337	-0.08422	0.01066	4.96e-15	18958	11
	rs33951980	rs33951980	chr7:73029437	C/T	rs33951980	chr7:73029437	C/T	1	1	0	Phospholipids in medium VLDL	Kettunen J	27005778	2016	European	Kettunen J	C	C/T	0.8739	0.1207	0.01528	5.23e-15	21234	12
	rs1260326	rs1260326	chr2:27730940	C/T	rs780093	chr2:27742603	C/T	0.908	0.955	1	Free cholesterol in small VLDL	Kettunen J	27005778	2016	European	Kettunen J	C	C/T	0.6362	-0.08004	0.01013	6.21e-15	21557	12
	rs1260326	rs1260326	chr2:27730940	C/T	rs780094	chr2:27741237	C/T	0.912	0.955	1	Cholesterol esters in medium VLDL	Kettunen J	27005778	2016	European	Kettunen J	C	C/T	0.6305	-0.08337	0.01057	7.3e-15	19273	11
	rs33951980	rs33951980	chr7:73029437	C/T	rs71556736	chr7:73034929	C/T	0.991	1	1	Phospholipids in medium VLDL	Kettunen J	27005778	2016	European	Kettunen J	C	C/T	0.8722	0.1198	0.01526	7.8e-15	21238	12
	rs1260326	rs1260326	chr2:27730940	C/T	rs780094	chr2:27741237	C/T	0.912	0.955	1	Concentration of very large VLDL particles	Kettunen J	27005778	2016	European	Kettunen J	C	C/T	0.6309	-0.0834	0.01066	8.73e-15	18960	11
	rs33951980	rs33951980	chr7:73029437	C/T	rs34062580	chr7:73033559	G/A	0.991	1	1	Phospholipids in medium VLDL	Kettunen J	27005778	2016	European	Kettunen J	G	G/A	0.8734	0.1195	0.0153	1.04e-14	21235	12
	rs33951980	rs33951980	chr7:73029437	C/T	rs34060476	chr7:73037956	A/G	0.963	1	1	Phospholipids in medium VLDL	Kettunen J	27005778	2016	European	Kettunen J	A	A/G	0.8733	0.1196	0.0153	1.04e-14	21239	12
	rs33951980	rs33951980	chr7:73029437	C/T	rs13229619	chr7:73030175	G/A	0.972	0.99	1	Phospholipids in medium VLDL	Kettunen J	27005778	2016	European	Kettunen J	G	G/A	0.8734	0.1194	0.01529	1.05e-14	21238	12
	rs1260326	rs1260326	chr2:27730940	C/T	rs780094	chr2:27741237	C/T	0.912	0.955	1	Concentration of chylomicrons and extremely large VLDL particles	Kettunen J	27005778	2016	European	Kettunen J	C	C/T	0.6309	-0.08342	0.01072	1.34e-14	18960	11
	rs1260326	rs1260326	chr2:27730940	C/T	rs780094	chr2:27741237	C/T	0.912	0.955	1	Phospholipids in chylomicrons and extremely large VLDL	Kettunen J	27005778	2016	European	Kettunen J	C	C/T	0.6332	-0.07874	0.01016	1.36e-14	21542	12
	rs1260326	rs1260326	chr2:27730940	C/T	rs4665972	chr2:27598097	C/T	0.869	0.942	1	Free cholesterol in small VLDL	Kettunen J	27005778	2016	European	Kettunen J	C	C/T	0.6087	-0.08038	0.01031	1.39e-14	21556	12
	rs1260326	rs1260326	chr2:27730940	C/T	rs780093	chr2:27742603	C/T	0.908	0.955	1	Concentration of very large VLDL particles	Kettunen J	27005778	2016	European	Kettunen J	C	C/T	0.6337	-0.08282	0.01067	1.42e-14	18958	11
	rs33951980	rs33951980	chr7:73029437	C/T	rs13240065	chr7:73015369	G/A	0.944	0.972	1	Cholesterol esters in large VLDL	Kettunen J	27005778	2016	European	Kettunen J	G	G/A	0.8765	0.1231	0.01581	1.42e-14	18956	11
	rs1260326	rs1260326	chr2:27730940	C/T	rs780093	chr2:27742603	C/T	0.908	0.955	1	Cholesterol esters in medium VLDL	Kettunen J	27005778	2016	European	Kettunen J	C	C/T	0.6333	-0.08248	0.01059	1.57e-14	19271	11
	rs1260326	rs1260326	chr2:27730940	C/T	rs4665972	chr2:27598097	C/T	0.869	0.942	1	Concentration of very large VLDL particles	Kettunen J	27005778	2016	European	Kettunen J	C	C/T	0.6036	-0.08319	0.01075	1.7e-14	18957	11
	rs33951980	rs33951980	chr7:73029437	C/T	rs13246993	chr7:73022746	G/A	0.962	1	1	Cholesterol esters in large VLDL	Kettunen J	27005778	2016	European	Kettunen J	G	G/A	0.8768	0.1232	0.01587	1.72e-14	18954	11
	rs33951980	rs33951980	chr7:73029437	C/T	rs13234131	chr7:73025975	A/G	0.962	1	1	Cholesterol esters in large VLDL	Kettunen J	27005778	2016	European	Kettunen J	A	A/G	0.8756	0.123	0.01586	1.87e-14	18955	11
	rs33951980	rs33951980	chr7:73029437	C/T	rs3812316	chr7:73020337	C/G	0.953	0.99	1	Cholesterol esters in large VLDL	Kettunen J	27005778	2016	European	Kettunen J	C	C/G	0.8766	0.1228	0.01584	1.87e-14	18954	11
	rs33951980	rs33951980	chr7:73029437	C/T	rs13234378	chr7:73026151	A/T	0.962	1	1	Cholesterol esters in large VLDL	Kettunen J	27005778	2016	European	Kettunen J	A	A/T	0.8764	0.123	0.01588	1.96e-14	18956	11
	rs1260326	rs1260326	chr2:27730940	C/T	rs1260326	chr2:27730940	C/T	1	1	0	Cholesterol esters in large VLDL	Kettunen J	27005778	2016	European	Kettunen J	C	C/T	0.6368	-0.08299	0.01072	2.08e-14	18960	11
	rs33951980	rs33951980	chr7:73029437	C/T	rs33951980	chr7:73029437	C/T	1	1	0	Cholesterol esters in large VLDL	Kettunen J	27005778	2016	European	Kettunen J	C	C/T	0.8761	0.1227	0.0159	2.42e-14	18954	11
	rs1260326	rs1260326	chr2:27730940	C/T	rs780093	chr2:27742603	C/T	0.908	0.955	1	Phospholipids in chylomicrons and extremely large VLDL	Kettunen J	27005778	2016	European	Kettunen J	C	C/T	0.6362	-0.07792	0.01016	2.44e-14	21540	12
	rs33951980	rs33951980	chr7:73029437	C/T	rs13240065	chr7:73015369	G/A	0.944	0.972	1	Total lipids in medium VLDL	Kettunen J	27005778	2016	European	Kettunen J	G	G/A	0.8764	0.1205	0.01567	2.82e-14	19268	11
	rs33951980	rs33951980	chr7:73029437	C/T	rs13246993	chr7:73022746	G/A	0.962	1	1	Total lipids in medium VLDL	Kettunen J	27005778	2016	European	Kettunen J	G	G/A	0.8767	0.1208	0.01573	3.14e-14	19268	11
	rs1260326	rs1260326	chr2:27730940	C/T	rs780093	chr2:27742603	C/T	0.908	0.955	1	Leucine	Kettunen J	27005778	2016	European	Kettunen J	C	C/T	0.6371	-0.07196	0.009471	3.3e-14	24726	14
	rs1260326	rs1260326	chr2:27730940	C/T	rs1260326	chr2:27730940	C/T	1	1	0	OmegaL3 fatty acids	Kettunen J	27005778	2016	European	Kettunen J	C	C/T	0.6369	-0.0968	0.01268	3.37e-14	13544	10
	rs33951980	rs33951980	chr7:73029437	C/T	rs3812316	chr7:73020337	C/G	0.953	0.99	1	Total lipids in medium VLDL	Kettunen J	27005778	2016	European	Kettunen J	C	C/G	0.8766	0.1203	0.0157	3.6e-14	19268	11
	rs33951980	rs33951980	chr7:73029437	C/T	rs13234378	chr7:73026151	A/T	0.962	1	1	Total lipids in medium VLDL	Kettunen J	27005778	2016	European	Kettunen J	A	A/T	0.8763	0.1206	0.01574	3.66e-14	19269	11
	rs33951980	rs33951980	chr7:73029437	C/T	rs13234131	chr7:73025975	A/G	0.962	1	1	Total lipids in medium VLDL	Kettunen J	27005778	2016	European	Kettunen J	A	A/G	0.8756	0.1202	0.01572	4.1e-14	19267	11
	rs33951980	rs33951980	chr7:73029437	C/T	rs71556736	chr7:73034929	C/T	0.991	1	1	Total lipids in medium VLDL	Kettunen J	27005778	2016	European	Kettunen J	C	C/T	0.8749	0.1201	0.01574	4.64e-14	19271	11
	rs33951980	rs33951980	chr7:73029437	C/T	rs33951980	chr7:73029437	C/T	1	1	0	Total lipids in medium VLDL	Kettunen J	27005778	2016	European	Kettunen J	C	C/T	0.876	0.1202	0.01576	4.69e-14	19268	11
	rs33951980	rs33951980	chr7:73029437	C/T	rs13229619	chr7:73030175	G/A	0.972	0.99	1	Cholesterol esters in large VLDL	Kettunen J	27005778	2016	European	Kettunen J	G	G/A	0.8762	0.1214	0.01591	4.81e-14	18958	11
	rs33951980	rs33951980	chr7:73029437	C/T	rs34062580	chr7:73033559	G/A	0.991	1	1	Cholesterol esters in large VLDL	Kettunen J	27005778	2016	European	Kettunen J	G	G/A	0.8762	0.1214	0.01592	4.89e-14	18955	11
	rs33951980	rs33951980	chr7:73029437	C/T	rs13234378	chr7:73026151	A/T	0.962	1	1	Triglycerides in small VLDL	Kettunen J	27005778	2016	European	Kettunen J	A	A/T	0.8755	0.1313	0.01721	4.95e-14	16852	11
	rs33951980	rs33951980	chr7:73029437	C/T	rs34060476	chr7:73037956	A/G	0.963	1	1	Cholesterol esters in large VLDL	Kettunen J	27005778	2016	European	Kettunen J	A	A/G	0.8761	0.1215	0.01593	5.02e-14	18959	11
	rs1260326	rs1260326	chr2:27730940	C/T	rs4665972	chr2:27598097	C/T	0.869	0.942	1	Cholesterol esters in medium VLDL	Kettunen J	27005778	2016	European	Kettunen J	C	C/T	0.6034	-0.08147	0.01067	5.14e-14	19270	11
	rs1260326	rs1260326	chr2:27730940	C/T	rs4665972	chr2:27598097	C/T	0.869	0.942	1	Total lipids in large VLDL	Kettunen J	27005778	2016	European	Kettunen J	C	C/T	0.6036	-0.08155	0.01074	5.36e-14	18957	11
	rs1260326	rs1260326	chr2:27730940	C/T	rs1260326	chr2:27730940	C/T	1	1	0	Alanine	Shin S	24816252	2014	European	Shin S	C	C/T	0.5949	-0.0131	0.0017	5.562e-14	7344	2
	rs33951980	rs33951980	chr7:73029437	C/T	rs71556736	chr7:73034929	C/T	0.991	1	1	Cholesterol esters in large VLDL	Kettunen J	27005778	2016	European	Kettunen J	C	C/T	0.875	0.1207	0.01588	5.95e-14	18958	11
	rs33951980	rs33951980	chr7:73029437	C/T	rs13246993	chr7:73022746	G/A	0.962	1	1	Triglycerides in small VLDL	Kettunen J	27005778	2016	European	Kettunen J	G	G/A	0.8742	0.1306	0.01717	6.14e-14	16851	11
	rs1260326	rs1260326	chr2:27730940	C/T	rs1260326	chr2:27730940	C/T	1	1	0	Triglycerides in very small VLDL	Kettunen J	27005778	2016	European	Kettunen J	C	C/T	0.6366	-0.08106	0.01065	6.6e-14	19273	11
	rs33951980	rs33951980	chr7:73029437	C/T	rs33951980	chr7:73029437	C/T	1	1	0	Triglycerides in small VLDL	Kettunen J	27005778	2016	European	Kettunen J	C	C/T	0.874	0.1304	0.01718	6.87e-14	16851	11
	rs1260326	rs1260326	chr2:27730940	C/T	rs4665972	chr2:27598097	C/T	0.869	0.942	1	Leucine	Kettunen J	27005778	2016	European	Kettunen J	C	C/T	0.609	-0.07249	0.009663	6.88e-14	24725	14
	rs33951980	rs33951980	chr7:73029437	C/T	rs3812316	chr7:73020337	C/G	0.953	0.99	1	Triglycerides in small VLDL	Kettunen J	27005778	2016	European	Kettunen J	C	C/G	0.8757	0.1304	0.01718	6.88e-14	16852	11
	rs33951980	rs33951980	chr7:73029437	C/T	rs34060476	chr7:73037956	A/G	0.963	1	1	Total lipids in medium VLDL	Kettunen J	27005778	2016	European	Kettunen J	A	A/G	0.8761	0.1195	0.0158	7.22e-14	19272	11
	rs33951980	rs33951980	chr7:73029437	C/T	rs34062580	chr7:73033559	G/A	0.991	1	1	Total lipids in medium VLDL	Kettunen J	27005778	2016	European	Kettunen J	G	G/A	0.8762	0.1194	0.01578	7.25e-14	19268	11
	rs33951980	rs33951980	chr7:73029437	C/T	rs13229619	chr7:73030175	G/A	0.972	0.99	1	Total lipids in medium VLDL	Kettunen J	27005778	2016	European	Kettunen J	G	G/A	0.8762	0.1194	0.01577	7.31e-14	19271	11
	rs1260326	rs1260326	chr2:27730940	C/T	rs780094	chr2:27741237	C/T	0.912	0.955	1	Leucine	Kettunen J	27005778	2016	European	Kettunen J	C	C/T	0.6345	-0.07411	0.009903	7.9e-14	22501	13
	rs33951980	rs33951980	chr7:73029437	C/T	rs13234131	chr7:73025975	A/G	0.962	1	1	Triglycerides in small VLDL	Kettunen J	27005778	2016	European	Kettunen J	A	A/G	0.8751	0.1302	0.0172	7.91e-14	16850	11
	rs33951980	rs33951980	chr7:73029437	C/T	rs71556736	chr7:73034929	C/T	0.991	1	1	Triglycerides in small VLDL	Kettunen J	27005778	2016	European	Kettunen J	C	C/T	0.872	0.1298	0.01714	7.99e-14	16854	11
	rs1260326	rs1260326	chr2:27730940	C/T	rs780094	chr2:27741237	C/T	0.912	0.955	1	Glycoprotein acetyls mainly a1Lacid glycoprotein	Kettunen J	27005778	2016	European	Kettunen J	C	C/T	0.6305	-0.07988	0.01057	8.32e-14	19270	11
	rs1260326	rs1260326	chr2:27730940	C/T	rs780094	chr2:27741237	C/T	0.912	0.955	1	Total lipids in very large VLDL	Kettunen J	27005778	2016	European	Kettunen J	C	C/T	0.6305	-0.07948	0.01057	9.51e-14	19273	11
	rs1260326	rs1260326	chr2:27730940	C/T	rs4665972	chr2:27598097	C/T	0.869	0.942	1	Concentration of chylomicrons and extremely large VLDL particles	Kettunen J	27005778	2016	European	Kettunen J	C	C/T	0.6036	-0.08116	0.01079	9.74e-14	18957	11
	rs1260326	rs1260326	chr2:27730940	C/T	rs780094	chr2:27741237	C/T	0.912	0.955	1	Cholesterol esters in large VLDL	Kettunen J	27005778	2016	European	Kettunen J	C	C/T	0.6309	-0.08013	0.01067	1.18e-13	18960	11
	rs33951980	rs33951980	chr7:73029437	C/T	rs34062580	chr7:73033559	G/A	0.991	1	1	Triglycerides in small VLDL	Kettunen J	27005778	2016	European	Kettunen J	G	G/A	0.8734	0.1293	0.0172	1.18e-13	16851	11
	rs33951980	rs33951980	chr7:73029437	C/T	rs13229619	chr7:73030175	G/A	0.972	0.99	1	Triglycerides in small VLDL	Kettunen J	27005778	2016	European	Kettunen J	G	G/A	0.8734	0.1292	0.01719	1.18e-13	16854	11
	rs1260326	rs1260326	chr2:27730940	C/T	rs780093	chr2:27742603	C/T	0.908	0.955	1	Total lipids in very large VLDL	Kettunen J	27005778	2016	European	Kettunen J	C	C/T	0.6333	-0.07911	0.01058	1.29e-13	19271	11
	rs1260326	rs1260326	chr2:27730940	C/T	rs4665972	chr2:27598097	C/T	0.869	0.942	1	Phospholipids in chylomicrons and extremely large VLDL	Kettunen J	27005778	2016	European	Kettunen J	C	C/T	0.6087	-0.07698	0.01033	1.29e-13	21539	12
	rs1260326	rs1260326	chr2:27730940	C/T	rs780093	chr2:27742603	C/T	0.908	0.955	1	Concentration of chylomicrons and extremely large VLDL particles	Kettunen J	27005778	2016	European	Kettunen J	C	C/T	0.6337	-0.07991	0.01071	1.49e-13	18958	11
	rs33951980	rs33951980	chr7:73029437	C/T	rs13246993	chr7:73022746	G/A	0.962	1	1	Concentration of large VLDL particles	Kettunen J	27005778	2016	European	Kettunen J	G	G/A	0.8768	0.1192	0.01588	1.55e-13	18954	11
	rs1260326	rs1260326	chr2:27730940	C/T	rs780094	chr2:27741237	C/T	0.912	0.955	1	Alanine	Shin S	24816252	2014	European	Shin S	C	C/T	0.6055	-0.0129	0.0018	1.563e-13	7344	2
	rs1260326	rs1260326	chr2:27730940	C/T	rs1260326	chr2:27730940	C/T	1	1	0	Total lipids in small HDL	Kettunen J	27005778	2016	European	Kettunen J	C	C/T	0.6366	-0.07852	0.01061	1.91e-13	19273	11
	rs33951980	rs33951980	chr7:73029437	C/T	rs13240065	chr7:73015369	G/A	0.944	0.972	1	Concentration of large VLDL particles	Kettunen J	27005778	2016	European	Kettunen J	G	G/A	0.8765	0.1182	0.01582	1.93e-13	18956	11
	rs33951980	rs33951980	chr7:73029437	C/T	rs13234131	chr7:73025975	A/G	0.962	1	1	Concentration of large VLDL particles	Kettunen J	27005778	2016	European	Kettunen J	A	A/G	0.8756	0.1185	0.01588	2.01e-13	18955	11
	rs33951980	rs33951980	chr7:73029437	C/T	rs3812316	chr7:73020337	C/G	0.953	0.99	1	Concentration of large VLDL particles	Kettunen J	27005778	2016	European	Kettunen J	C	C/G	0.8766	0.1183	0.01585	2.11e-13	18954	11
	rs1260326	rs1260326	chr2:27730940	C/T	rs780093	chr2:27742603	C/T	0.908	0.955	1	Cholesterol esters in large VLDL	Kettunen J	27005778	2016	European	Kettunen J	C	C/T	0.6337	-0.07918	0.01067	2.29e-13	18958	11
	rs33951980	rs33951980	chr7:73029437	C/T	rs13234378	chr7:73026151	A/T	0.962	1	1	Concentration of large VLDL particles	Kettunen J	27005778	2016	European	Kettunen J	A	A/T	0.8764	0.1181	0.01589	2.67e-13	18956	11
	rs1260326	rs1260326	chr2:27730940	C/T	rs780093	chr2:27742603	C/T	0.908	0.955	1	Alanine	Shin S	24816252	2014	European	Shin S	C	C/T	0.605	-0.0127	0.0017	2.797e-13	7344	2
	rs33951980	rs33951980	chr7:73029437	C/T	rs33951980	chr7:73029437	C/T	1	1	0	Concentration of large VLDL particles	Kettunen J	27005778	2016	European	Kettunen J	C	C/T	0.8761	0.1175	0.01591	3.56e-13	18954	11
	rs1260326	rs1260326	chr2:27730940	C/T	rs4665972	chr2:27598097	C/T	0.869	0.942	1	Glycoprotein acetyls mainly a1Lacid glycoprotein	Kettunen J	27005778	2016	European	Kettunen J	C	C/T	0.6034	-0.07838	0.01066	3.91e-13	19267	11
	rs33951980	rs33951980	chr7:73029437	C/T	rs3812316	chr7:73020337	C/G	0.953	0.99	1	Triglycerides in very large VLDL	Kettunen J	27005778	2016	European	Kettunen J	C	C/G	0.8753	0.1103	0.01511	4.45e-13	21543	12
	rs33951980	rs33951980	chr7:73029437	C/T	rs13229619	chr7:73030175	G/A	0.972	0.99	1	Concentration of large VLDL particles	Kettunen J	27005778	2016	European	Kettunen J	G	G/A	0.8762	0.1171	0.01592	4.54e-13	18958	11
	rs33951980	rs33951980	chr7:73029437	C/T	rs13234378	chr7:73026151	A/T	0.962	1	1	Triglycerides in very large VLDL	Kettunen J	27005778	2016	European	Kettunen J	A	A/T	0.875	0.1105	0.01515	4.54e-13	21544	12
	rs33951980	rs33951980	chr7:73029437	C/T	rs13246993	chr7:73022746	G/A	0.962	1	1	Triglycerides in very large VLDL	Kettunen J	27005778	2016	European	Kettunen J	G	G/A	0.8741	0.1103	0.01512	4.55e-13	21543	12
	rs33951980	rs33951980	chr7:73029437	C/T	rs13234131	chr7:73025975	A/G	0.962	1	1	Triglycerides in very large VLDL	Kettunen J	27005778	2016	European	Kettunen J	A	A/G	0.8743	0.1104	0.01513	4.59e-13	21542	12
	rs33951980	rs33951980	chr7:73029437	C/T	rs34062580	chr7:73033559	G/A	0.991	1	1	Concentration of large VLDL particles	Kettunen J	27005778	2016	European	Kettunen J	G	G/A	0.8762	0.1171	0.01593	4.68e-13	18955	11
	rs33951980	rs33951980	chr7:73029437	C/T	rs34060476	chr7:73037956	A/G	0.963	1	1	Concentration of large VLDL particles	Kettunen J	27005778	2016	European	Kettunen J	A	A/G	0.8761	0.1171	0.01594	4.94e-13	18959	11
	rs33951980	rs33951980	chr7:73029437	C/T	rs71556736	chr7:73034929	C/T	0.991	1	1	Concentration of large VLDL particles	Kettunen J	27005778	2016	European	Kettunen J	C	C/T	0.875	0.1167	0.01589	4.98e-13	18958	11
	rs1260326	rs1260326	chr2:27730940	C/T	rs4665972	chr2:27598097	C/T	0.869	0.942	1	Concentration of small HDL particles	Kettunen J	27005778	2016	European	Kettunen J	C	C/T	0.6034	-0.07758	0.01066	5.02e-13	19270	11
	rs33951980	rs33951980	chr7:73029437	C/T	rs33951980	chr7:73029437	C/T	1	1	0	Triglycerides in very large VLDL	Kettunen J	27005778	2016	European	Kettunen J	C	C/T	0.8739	0.1102	0.01513	5.2e-13	21543	12
	rs1260326	rs1260326	chr2:27730940	C/T	rs780094	chr2:27741237	C/T	0.912	0.955	1	Concentration of small HDL particles	Kettunen J	27005778	2016	European	Kettunen J	C	C/T	0.6305	-0.0767	0.01056	5.54e-13	19273	11
	rs33951980	rs33951980	chr7:73029437	C/T	rs13240065	chr7:73015369	G/A	0.944	0.972	1	Triglycerides in very large VLDL	Kettunen J	27005778	2016	European	Kettunen J	G	G/A	0.8747	0.1093	0.01506	6.06e-13	21543	12
	rs1260326	rs1260326	chr2:27730940	C/T	rs780093	chr2:27742603	C/T	0.908	0.955	1	Pyruvate	Kettunen J	27005778	2016	European	Kettunen J	C	C/T	0.637	-0.06832	0.009488	6.22e-13	24754	14
	rs1260326	rs1260326	chr2:27730940	C/T	rs1260326	chr2:27730940	C/T	1	1	0	Total cholesterol in small VLDL	Kettunen J	27005778	2016	European	Kettunen J	C	C/T	0.6389	-0.07396	0.01019	7.58e-13	21557	12
	rs1260326	rs1260326	chr2:27730940	C/T	rs780093	chr2:27742603	C/T	0.908	0.955	1	Glycoprotein acetyls mainly a1Lacid glycoprotein	Kettunen J	27005778	2016	European	Kettunen J	C	C/T	0.6333	-0.07676	0.01058	7.83e-13	19268	11
	rs1260326	rs1260326	chr2:27730940	C/T	rs780094	chr2:27741237	C/T	0.912	0.955	1	Triglycerides in very small VLDL	Kettunen J	27005778	2016	European	Kettunen J	C	C/T	0.6305	-0.07698	0.0106	8.39e-13	19273	11
	rs33951980	rs33951980	chr7:73029437	C/T	rs13240065	chr7:73015369	G/A	0.944	0.972	1	Total lipids in large VLDL	Kettunen J	27005778	2016	European	Kettunen J	G	G/A	0.8765	0.114	0.0158	8.67e-13	18956	11
	rs33951980	rs33951980	chr7:73029437	C/T	rs34060476	chr7:73037956	A/G	0.963	1	1	Triglycerides in very large VLDL	Kettunen J	27005778	2016	European	Kettunen J	A	A/G	0.8734	0.1092	0.01516	8.87e-13	21547	12
	rs33951980	rs33951980	chr7:73029437	C/T	rs71556736	chr7:73034929	C/T	0.991	1	1	Triglycerides in very large VLDL	Kettunen J	27005778	2016	European	Kettunen J	C	C/T	0.8723	0.1089	0.01511	8.93e-13	21546	12
	rs1260326	rs1260326	chr2:27730940	C/T	rs11127048	chr2:27752463	A/G	0.82	0.913	1	Free cholesterol in medium VLDL	Kettunen J	27005778	2016	European	Kettunen J	A	A/G	0.577	-0.07613	0.01055	9.01e-13	21238	12
	rs33951980	rs33951980	chr7:73029437	C/T	rs34062580	chr7:73033559	G/A	0.991	1	1	Triglycerides in very large VLDL	Kettunen J	27005778	2016	European	Kettunen J	G	G/A	0.8734	0.1091	0.01515	9.09e-13	21543	12
	rs33951980	rs33951980	chr7:73029437	C/T	rs13229619	chr7:73030175	G/A	0.972	0.99	1	Triglycerides in very large VLDL	Kettunen J	27005778	2016	European	Kettunen J	G	G/A	0.8734	0.109	0.01514	9.59e-13	21546	12
	rs33951980	rs33951980	chr7:73029437	C/T	rs13240065	chr7:73015369	G/A	0.944	0.972	1	Serum total triglycerides	Kettunen J	27005778	2016	European	Kettunen J	G	G/A	0.8747	0.1087	0.01508	1.02e-12	21540	12
	rs1260326	rs1260326	chr2:27730940	C/T	rs4665972	chr2:27598097	C/T	0.869	0.942	1	Cholesterol esters in large VLDL	Kettunen J	27005778	2016	European	Kettunen J	C	C/T	0.6036	-0.07755	0.01075	1.04e-12	18957	11
	rs1260326	rs1260326	chr2:27730940	C/T	rs11127048	chr2:27752463	A/G	0.82	0.913	1	MonoLunsaturated fatty acids	Kettunen J	27005778	2016	European	Kettunen J	A	A/G	0.5719	-0.09285	0.01291	1.06e-12	13534	10
	rs33951980	rs33951980	chr7:73029437	C/T	rs13246993	chr7:73022746	G/A	0.962	1	1	Total lipids in large VLDL	Kettunen J	27005778	2016	European	Kettunen J	G	G/A	0.8768	0.114	0.01586	1.07e-12	18954	11
	rs1260326	rs1260326	chr2:27730940	C/T	rs4665972	chr2:27598097	C/T	0.869	0.942	1	Total lipids in very large VLDL	Kettunen J	27005778	2016	European	Kettunen J	C	C/T	0.6034	-0.07656	0.01065	1.09e-12	19270	11
	rs33951980	rs33951980	chr7:73029437	C/T	rs13246993	chr7:73022746	G/A	0.962	1	1	Serum total triglycerides	Kettunen J	27005778	2016	European	Kettunen J	G	G/A	0.8741	0.1089	0.01514	1.15e-12	21540	12
	rs33951980	rs33951980	chr7:73029437	C/T	rs13240065	chr7:73015369	G/A	0.944	0.972	1	Total cholesterol in medium VLDL	Kettunen J	27005778	2016	European	Kettunen J	G	G/A	0.8747	0.1083	0.01508	1.16e-12	21546	12
	rs33951980	rs33951980	chr7:73029437	C/T	rs3812316	chr7:73020337	C/G	0.953	0.99	1	Serum total triglycerides	Kettunen J	27005778	2016	European	Kettunen J	C	C/G	0.8753	0.1088	0.01513	1.19e-12	21540	12
	rs33951980	rs33951980	chr7:73029437	C/T	rs3812316	chr7:73020337	C/G	0.953	0.99	1	Total lipids in large VLDL	Kettunen J	27005778	2016	European	Kettunen J	C	C/G	0.8766	0.1135	0.01583	1.23e-12	18954	11
	rs33951980	rs33951980	chr7:73029437	C/T	rs13234378	chr7:73026151	A/T	0.962	1	1	Serum total triglycerides	Kettunen J	27005778	2016	European	Kettunen J	A	A/T	0.8751	0.1088	0.01517	1.32e-12	21541	12
	rs1260326	rs1260326	chr2:27730940	C/T	rs11127048	chr2:27752463	A/G	0.82	0.913	1	Triglycerides in small VLDL	Kettunen J	27005778	2016	European	Kettunen J	A	A/G	0.5763	-0.07515	0.01047	1.4e-12	21557	12
	rs33951980	rs33951980	chr7:73029437	C/T	rs13234131	chr7:73025975	A/G	0.962	1	1	Total lipids in large VLDL	Kettunen J	27005778	2016	European	Kettunen J	A	A/G	0.8756	0.1133	0.01585	1.42e-12	18955	11
	rs33951980	rs33951980	chr7:73029437	C/T	rs13234378	chr7:73026151	A/T	0.962	1	1	Total lipids in large VLDL	Kettunen J	27005778	2016	European	Kettunen J	A	A/T	0.8764	0.1134	0.01587	1.47e-12	18956	11
	rs33951980	rs33951980	chr7:73029437	C/T	rs13234131	chr7:73025975	A/G	0.962	1	1	Serum total triglycerides	Kettunen J	27005778	2016	European	Kettunen J	A	A/G	0.8743	0.1084	0.01515	1.54e-12	21539	12
	rs33951980	rs33951980	chr7:73029437	C/T	rs13246993	chr7:73022746	G/A	0.962	1	1	Total cholesterol in medium VLDL	Kettunen J	27005778	2016	European	Kettunen J	G	G/A	0.8741	0.1081	0.01514	1.6e-12	21546	12
	rs33951980	rs33951980	chr7:73029437	C/T	rs33951980	chr7:73029437	C/T	1	1	0	Serum total triglycerides	Kettunen J	27005778	2016	European	Kettunen J	C	C/T	0.8739	0.1081	0.01515	1.74e-12	21540	12
	rs1260326	rs1260326	chr2:27730940	C/T	rs780094	chr2:27741237	C/T	0.912	0.955	1	OmegaL3 fatty acids	Kettunen J	27005778	2016	European	Kettunen J	C	C/T	0.6302	-0.08944	0.01259	1.76e-12	13544	10
	rs33951980	rs33951980	chr7:73029437	C/T	rs3812316	chr7:73020337	C/G	0.953	0.99	1	Total cholesterol in medium VLDL	Kettunen J	27005778	2016	European	Kettunen J	C	C/G	0.8753	0.1078	0.01513	1.82e-12	21546	12
	rs33951980	rs33951980	chr7:73029437	C/T	rs33951980	chr7:73029437	C/T	1	1	0	Total lipids in large VLDL	Kettunen J	27005778	2016	European	Kettunen J	C	C/T	0.8761	0.1129	0.01588	1.89e-12	18954	11
	rs33951980	rs33951980	chr7:73029437	C/T	rs71556736	chr7:73034929	C/T	0.991	1	1	Serum total triglycerides	Kettunen J	27005778	2016	European	Kettunen J	C	C/T	0.8723	0.1076	0.01513	2.05e-12	21543	12
	rs1260326	rs1260326	chr2:27730940	C/T	rs11127048	chr2:27752463	A/G	0.82	0.913	1	Triglycerides in very large VLDL	Kettunen J	27005778	2016	European	Kettunen J	A	A/G	0.5763	-0.07408	0.01046	2.1e-12	21547	12
	rs33951980	rs33951980	chr7:73029437	C/T	rs13234378	chr7:73026151	A/T	0.962	1	1	Total cholesterol in medium VLDL	Kettunen J	27005778	2016	European	Kettunen J	A	A/T	0.875	0.1075	0.01517	2.29e-12	21547	12
	rs1260326	rs1260326	chr2:27730940	C/T	rs780093	chr2:27742603	C/T	0.908	0.955	1	Concentration of small HDL particles	Kettunen J	27005778	2016	European	Kettunen J	C	C/T	0.6333	-0.07463	0.01058	2.5e-12	19271	11
	rs33951980	rs33951980	chr7:73029437	C/T	rs13234131	chr7:73025975	A/G	0.962	1	1	Total cholesterol in medium VLDL	Kettunen J	27005778	2016	European	Kettunen J	A	A/G	0.8743	0.1071	0.01516	2.64e-12	21545	12
	rs33951980	rs33951980	chr7:73029437	C/T	rs34062580	chr7:73033559	G/A	0.991	1	1	Serum total triglycerides	Kettunen J	27005778	2016	European	Kettunen J	G	G/A	0.8734	0.1073	0.01517	2.67e-12	21540	12
	rs33951980	rs33951980	chr7:73029437	C/T	rs13229619	chr7:73030175	G/A	0.972	0.99	1	Serum total triglycerides	Kettunen J	27005778	2016	European	Kettunen J	G	G/A	0.8734	0.1072	0.01516	2.69e-12	21543	12
	rs33951980	rs33951980	chr7:73029437	C/T	rs34060476	chr7:73037956	A/G	0.963	1	1	Serum total triglycerides	Kettunen J	27005778	2016	European	Kettunen J	A	A/G	0.8734	0.1074	0.01518	2.7e-12	21544	12
	rs33951980	rs33951980	chr7:73029437	C/T	rs13246993	chr7:73022746	G/A	0.962	1	1	Phospholipids in very large VLDL	Kettunen J	27005778	2016	European	Kettunen J	G	G/A	0.8741	0.1077	0.01526	2.78e-12	21231	12
	rs33951980	rs33951980	chr7:73029437	C/T	rs33951980	chr7:73029437	C/T	1	1	0	Total cholesterol in medium VLDL	Kettunen J	27005778	2016	European	Kettunen J	C	C/T	0.8739	0.1069	0.01516	2.87e-12	21546	12
	rs33951980	rs33951980	chr7:73029437	C/T	rs71556736	chr7:73034929	C/T	0.991	1	1	Total lipids in large VLDL	Kettunen J	27005778	2016	European	Kettunen J	C	C/T	0.875	0.1119	0.01587	2.87e-12	18958	11
	rs33951980	rs33951980	chr7:73029437	C/T	rs13229619	chr7:73030175	G/A	0.972	0.99	1	Total lipids in large VLDL	Kettunen J	27005778	2016	European	Kettunen J	G	G/A	0.8762	0.1121	0.0159	2.89e-12	18958	11
	rs33951980	rs33951980	chr7:73029437	C/T	rs34062580	chr7:73033559	G/A	0.991	1	1	Total lipids in large VLDL	Kettunen J	27005778	2016	European	Kettunen J	G	G/A	0.8762	0.1121	0.01591	2.95e-12	18955	11
	rs33951980	rs33951980	chr7:73029437	C/T	rs13234378	chr7:73026151	A/T	0.962	1	1	Phospholipids in very large VLDL	Kettunen J	27005778	2016	European	Kettunen J	A	A/T	0.8751	0.1077	0.01529	2.99e-12	21233	12
	rs33951980	rs33951980	chr7:73029437	C/T	rs3812316	chr7:73020337	C/G	0.953	0.99	1	Phospholipids in very large VLDL	Kettunen J	27005778	2016	European	Kettunen J	C	C/G	0.8753	0.1075	0.01526	2.99e-12	21231	12
	rs33951980	rs33951980	chr7:73029437	C/T	rs13234131	chr7:73025975	A/G	0.962	1	1	Phospholipids in very large VLDL	Kettunen J	27005778	2016	European	Kettunen J	A	A/G	0.8744	0.1076	0.01528	3.01e-12	21232	12
	rs33951980	rs33951980	chr7:73029437	C/T	rs34060476	chr7:73037956	A/G	0.963	1	1	Total lipids in large VLDL	Kettunen J	27005778	2016	European	Kettunen J	A	A/G	0.8761	0.1121	0.01592	3.06e-12	18959	11
	rs1260326	rs1260326	chr2:27730940	C/T	rs11127048	chr2:27752463	A/G	0.82	0.913	1	Phospholipids in medium VLDL	Kettunen J	27005778	2016	European	Kettunen J	A	A/G	0.577	-0.07442	0.01056	3.08e-12	21238	12
	rs1260326	rs1260326	chr2:27730940	C/T	rs11127048	chr2:27752463	A/G	0.82	0.913	1	Triglycerides in chylomicrons and extremely large VLDL	Kettunen J	27005778	2016	European	Kettunen J	A	A/G	0.5763	-0.07332	0.01047	3.27e-12	21539	12
	rs1260326	rs1260326	chr2:27730940	C/T	rs780093	chr2:27742603	C/T	0.908	0.955	1	Triglycerides in very small VLDL	Kettunen J	27005778	2016	European	Kettunen J	C	C/T	0.6333	-0.07488	0.0106	3.51e-12	19271	11
	rs33951980	rs33951980	chr7:73029437	C/T	rs33951980	chr7:73029437	C/T	1	1	0	Phospholipids in very large VLDL	Kettunen J	27005778	2016	European	Kettunen J	C	C/T	0.8739	0.1072	0.01528	3.69e-12	21231	12
	rs1260326	rs1260326	chr2:27730940	C/T	rs11127048	chr2:27752463	A/G	0.82	0.913	1	Free cholesterol in large VLDL	Kettunen J	27005778	2016	European	Kettunen J	A	A/G	0.577	-0.07374	0.01055	4.24e-12	21236	12
	rs1260326	rs1260326	chr2:27730940	C/T	rs11127048	chr2:27752463	A/G	0.82	0.913	1	Total cholesterol in medium VLDL	Kettunen J	27005778	2016	European	Kettunen J	A	A/G	0.5763	-0.0733	0.01048	4.36e-12	21550	12
	rs33951980	rs33951980	chr7:73029437	C/T	rs71556736	chr7:73034929	C/T	0.991	1	1	Total cholesterol in medium VLDL	Kettunen J	27005778	2016	European	Kettunen J	C	C/T	0.8723	0.1058	0.01514	4.48e-12	21549	12
	rs33951980	rs33951980	chr7:73029437	C/T	rs13240065	chr7:73015369	G/A	0.944	0.972	1	Phospholipids in very large VLDL	Kettunen J	27005778	2016	European	Kettunen J	G	G/A	0.8748	0.1062	0.0152	4.55e-12	21233	12
	rs1260326	rs1260326	chr2:27730940	C/T	rs4665972	chr2:27598097	C/T	0.869	0.942	1	Triglycerides in very small VLDL	Kettunen J	27005778	2016	European	Kettunen J	C	C/T	0.6034	-0.07504	0.01069	4.69e-12	19270	11
	rs1260326	rs1260326	chr2:27730940	C/T	rs1260326	chr2:27730940	C/T	1	1	0	Concentration of small LDL particles	Kettunen J	27005778	2016	European	Kettunen J	C	C/T	0.6366	-0.07465	0.01063	4.91e-12	19273	11
	rs1260326	rs1260326	chr2:27730940	C/T	rs11127048	chr2:27752463	A/G	0.82	0.913	1	OmegaL7 and L9 and saturated fatty acids	Kettunen J	27005778	2016	European	Kettunen J	A	A/G	0.5718	-0.08984	0.01294	5.31e-12	13502	10
	rs33951980	rs33951980	chr7:73029437	C/T	rs13229619	chr7:73030175	G/A	0.972	0.99	1	Total cholesterol in medium VLDL	Kettunen J	27005778	2016	European	Kettunen J	G	G/A	0.8734	0.1056	0.01517	5.43e-12	21549	12
	rs33951980	rs33951980	chr7:73029437	C/T	rs34062580	chr7:73033559	G/A	0.991	1	1	Total cholesterol in medium VLDL	Kettunen J	27005778	2016	European	Kettunen J	G	G/A	0.8734	0.1057	0.01518	5.49e-12	21546	12
	rs1260326	rs1260326	chr2:27730940	C/T	rs11127048	chr2:27752463	A/G	0.82	0.913	1	Phospholipids in large VLDL	Kettunen J	27005778	2016	European	Kettunen J	A	A/G	0.577	-0.07329	0.01055	5.51e-12	21237	12
	rs33951980	rs33951980	chr7:73029437	C/T	rs34060476	chr7:73037956	A/G	0.963	1	1	Total cholesterol in medium VLDL	Kettunen J	27005778	2016	European	Kettunen J	A	A/G	0.8734	0.1056	0.01518	5.66e-12	21550	12
	rs1260326	rs1260326	chr2:27730940	C/T	rs11127048	chr2:27752463	A/G	0.82	0.913	1	Phospholipids in very large VLDL	Kettunen J	27005778	2016	European	Kettunen J	A	A/G	0.577	-0.07324	0.01055	6.26e-12	21235	12
	rs1260326	rs1260326	chr2:27730940	C/T	rs1260326	chr2:27730940	C/T	1	1	0	Total lipids in chylomicrons and extremely large VLDL	Kettunen J	27005778	2016	European	Kettunen J	C	C/T	0.6368	-0.07414	0.01073	6.52e-12	18960	11
	rs1260326	rs1260326	chr2:27730940	C/T	rs780093	chr2:27742603	C/T	0.908	0.955	1	OmegaL3 fatty acids	Kettunen J	27005778	2016	European	Kettunen J	C	C/T	0.6325	-0.0872	0.01262	6.8e-12	13542	10
	rs33951980	rs33951980	chr7:73029437	C/T	rs34060476	chr7:73037956	A/G	0.963	1	1	Phospholipids in very large VLDL	Kettunen J	27005778	2016	European	Kettunen J	A	A/G	0.8734	0.1057	0.0153	7.9e-12	21236	12
	rs33951980	rs33951980	chr7:73029437	C/T	rs34062580	chr7:73033559	G/A	0.991	1	1	Phospholipids in very large VLDL	Kettunen J	27005778	2016	European	Kettunen J	G	G/A	0.8734	0.1056	0.01529	8.01e-12	21232	12
	rs33951980	rs33951980	chr7:73029437	C/T	rs13229619	chr7:73030175	G/A	0.972	0.99	1	Phospholipids in very large VLDL	Kettunen J	27005778	2016	European	Kettunen J	G	G/A	0.8734	0.1054	0.01529	8.33e-12	21235	12
	rs33951980	rs33951980	chr7:73029437	C/T	rs71556736	chr7:73034929	C/T	0.991	1	1	Phospholipids in very large VLDL	Kettunen J	27005778	2016	European	Kettunen J	C	C/T	0.8722	0.105	0.01526	9.36e-12	21235	12
	rs1260326	rs1260326	chr2:27730940	C/T	rs11127048	chr2:27752463	A/G	0.82	0.913	1	Phospholipids in small VLDL	Kettunen J	27005778	2016	European	Kettunen J	A	A/G	0.5763	-0.07203	0.01048	1.14e-11	21550	12
	rs1260326	rs1260326	chr2:27730940	C/T	rs4665972	chr2:27598097	C/T	0.869	0.942	1	OmegaL3 fatty acids	Kettunen J	27005778	2016	European	Kettunen J	C	C/T	0.601	-0.08693	0.01273	1.21e-11	13539	10
	rs33951980	rs33951980	chr7:73029437	C/T	rs13240065	chr7:73015369	G/A	0.944	0.972	1	Glycoprotein acetyls mainly a1Lacid glycoprotein	Kettunen J	27005778	2016	European	Kettunen J	G	G/A	0.8764	0.1074	0.01567	1.33e-11	19265	11
	rs33951980	rs33951980	chr7:73029437	C/T	rs13240065	chr7:73015369	G/A	0.944	0.972	1	Concentration of small VLDL particles	Kettunen J	27005778	2016	European	Kettunen J	G	G/A	0.8764	0.1071	0.01568	1.69e-11	19268	11
	rs33951980	rs33951980	chr7:73029437	C/T	rs3812316	chr7:73020337	C/G	0.953	0.99	1	Glycoprotein acetyls mainly a1Lacid glycoprotein	Kettunen J	27005778	2016	European	Kettunen J	C	C/G	0.8765	0.1068	0.01571	1.87e-11	19265	11
	rs33951980	rs33951980	chr7:73029437	C/T	rs13246993	chr7:73022746	G/A	0.962	1	1	Concentration of small VLDL particles	Kettunen J	27005778	2016	European	Kettunen J	G	G/A	0.8767	0.107	0.01574	2.13e-11	19268	11
	rs33951980	rs33951980	chr7:73029437	C/T	rs13246993	chr7:73022746	G/A	0.962	1	1	Glycoprotein acetyls mainly a1Lacid glycoprotein	Kettunen J	27005778	2016	European	Kettunen J	G	G/A	0.8767	0.1067	0.01574	2.19e-11	19265	11
	rs33951980	rs33951980	chr7:73029437	C/T	rs3812316	chr7:73020337	C/G	0.953	0.99	1	Concentration of small VLDL particles	Kettunen J	27005778	2016	European	Kettunen J	C	C/G	0.8766	0.1065	0.01571	2.37e-11	19268	11
	rs1260326	rs1260326	chr2:27730940	C/T	rs780094	chr2:27741237	C/T	0.912	0.955	1	Total cholesterol in small VLDL	Kettunen J	27005778	2016	European	Kettunen J	C	C/T	0.6332	-0.06843	0.01013	2.49e-11	21557	12
	rs33951980	rs33951980	chr7:73029437	C/T	rs13234378	chr7:73026151	A/T	0.962	1	1	Concentration of small VLDL particles	Kettunen J	27005778	2016	European	Kettunen J	A	A/T	0.8763	0.1065	0.01575	2.73e-11	19269	11
	rs1260326	rs1260326	chr2:27730940	C/T	rs11127048	chr2:27752463	A/G	0.82	0.913	1	Concentration of large VLDL particles	Kettunen J	27005778	2016	European	Kettunen J	A	A/G	0.572	-0.07398	0.01094	2.82e-11	18958	11
	rs33951980	rs33951980	chr7:73029437	C/T	rs33951980	chr7:73029437	C/T	1	1	0	Concentration of small VLDL particles	Kettunen J	27005778	2016	European	Kettunen J	C	C/T	0.876	0.1061	0.01577	3.3e-11	19268	11
	rs1260326	rs1260326	chr2:27730940	C/T	rs11127048	chr2:27752463	A/G	0.82	0.913	1	VLDL diameter	Kettunen J	27005778	2016	European	Kettunen J	A	A/G	0.5713	-0.07247	0.01082	3.39e-11	19272	11
	rs33951980	rs33951980	chr7:73029437	C/T	rs13234131	chr7:73025975	A/G	0.962	1	1	Concentration of small VLDL particles	Kettunen J	27005778	2016	European	Kettunen J	A	A/G	0.8756	0.1058	0.01573	3.47e-11	19267	11
	rs1260326	rs1260326	chr2:27730940	C/T	rs780093	chr2:27742603	C/T	0.908	0.955	1	Total cholesterol in small VLDL	Kettunen J	27005778	2016	European	Kettunen J	C	C/T	0.6362	-0.068	0.01014	3.49e-11	21555	12
	rs33951980	rs33951980	chr7:73029437	C/T	rs13234131	chr7:73025975	A/G	0.962	1	1	Glycoprotein acetyls mainly a1Lacid glycoprotein	Kettunen J	27005778	2016	European	Kettunen J	A	A/G	0.8756	0.1055	0.01573	3.49e-11	19265	11
	rs1260326	rs1260326	chr2:27730940	C/T	rs1260326	chr2:27730940	C/T	1	1	0	Triglycerides in small HDL	Kettunen J	27005778	2016	European	Kettunen J	C	C/T	0.6389	-0.06854	0.01024	3.58e-11	21558	12
	rs33951980	rs33951980	chr7:73029437	C/T	rs13234378	chr7:73026151	A/T	0.962	1	1	Glycoprotein acetyls mainly a1Lacid glycoprotein	Kettunen J	27005778	2016	European	Kettunen J	A	A/T	0.8763	0.1056	0.01575	3.58e-11	19266	11
	rs1260326	rs1260326	chr2:27730940	C/T	rs11127048	chr2:27752463	A/G	0.82	0.913	1	Total fatty acids	Kettunen J	27005778	2016	European	Kettunen J	A	A/G	0.5718	-0.08607	0.01295	3.63e-11	13501	10
	rs1260326	rs1260326	chr2:27730940	C/T	rs780094	chr2:27741237	C/T	0.912	0.955	1	Total lipids in chylomicrons and extremely large VLDL	Kettunen J	27005778	2016	European	Kettunen J	C	C/T	0.6309	-0.07087	0.01068	4.17e-11	18960	11
	rs1260326	rs1260326	chr2:27730940	C/T	rs1260326	chr2:27730940	C/T	1	1	0	Serum total cholesterol	Kettunen J	27005778	2016	European	Kettunen J	C	C/T	0.6389	-0.06805	0.01022	4.44e-11	21491	12
	rs33951980	rs33951980	chr7:73029437	C/T	rs33951980	chr7:73029437	C/T	1	1	0	Glycoprotein acetyls mainly a1Lacid glycoprotein	Kettunen J	27005778	2016	European	Kettunen J	C	C/T	0.876	0.1051	0.01576	4.65e-11	19265	11
	rs1260326	rs1260326	chr2:27730940	C/T	rs11127048	chr2:27752463	A/G	0.82	0.913	1	Isoleucine	Kettunen J	27005778	2016	European	Kettunen J	A	A/G	0.5816	-0.06513	0.009846	4.78e-11	24775	14
	rs1260326	rs1260326	chr2:27730940	C/T	rs11127048	chr2:27752463	A/G	0.82	0.913	1	Total cholesterol in large VLDL	Kettunen J	27005778	2016	European	Kettunen J	A	A/G	0.577	-0.06998	0.01055	4.8e-11	21233	12
	rs33951980	rs33951980	chr7:73029437	C/T	rs71556736	chr7:73034929	C/T	0.991	1	1	Concentration of small VLDL particles	Kettunen J	27005778	2016	European	Kettunen J	C	C/T	0.8749	0.1051	0.01575	4.9e-11	19271	11
	rs1260326	rs1260326	chr2:27730940	C/T	rs11127048	chr2:27752463	A/G	0.82	0.913	1	Triglycerides in large VLDL	Kettunen J	27005778	2016	European	Kettunen J	A	A/G	0.577	-0.06988	0.01055	5e-11	21237	12
	rs33951980	rs33951980	chr7:73029437	C/T	rs13246993	chr7:73022746	G/A	0.962	1	1	Phospholipids in large VLDL	Kettunen J	27005778	2016	European	Kettunen J	G	G/A	0.8729	0.1089	0.0165	5.84e-11	18137	10
	rs33951980	rs33951980	chr7:73029437	C/T	rs13229619	chr7:73030175	G/A	0.972	0.99	1	Concentration of small VLDL particles	Kettunen J	27005778	2016	European	Kettunen J	G	G/A	0.8762	0.1048	0.01578	6.02e-11	19271	11
	rs33951980	rs33951980	chr7:73029437	C/T	rs34062580	chr7:73033559	G/A	0.991	1	1	Concentration of small VLDL particles	Kettunen J	27005778	2016	European	Kettunen J	G	G/A	0.8762	0.1048	0.01579	6.08e-11	19268	11
	rs33951980	rs33951980	chr7:73029437	C/T	rs34060476	chr7:73037956	A/G	0.963	1	1	Concentration of small VLDL particles	Kettunen J	27005778	2016	European	Kettunen J	A	A/G	0.8761	0.1048	0.0158	6.26e-11	19272	11
	rs1260326	rs1260326	chr2:27730940	C/T	rs4665972	chr2:27598097	C/T	0.869	0.942	1	Total lipids in small HDL	Kettunen J	27005778	2016	European	Kettunen J	C	C/T	0.6034	-0.06997	0.01067	7.09e-11	19270	11
	rs33951980	rs33951980	chr7:73029437	C/T	rs13240065	chr7:73015369	G/A	0.944	0.972	1	Concentration of chylomicrons and extremely large VLDL particles	Kettunen J	27005778	2016	European	Kettunen J	G	G/A	0.8764	0.1065	0.01617	7.14e-11	18249	10
	rs33951980	rs33951980	chr7:73029437	C/T	rs13240065	chr7:73015369	G/A	0.944	0.972	1	Phospholipids in large VLDL	Kettunen J	27005778	2016	European	Kettunen J	G	G/A	0.8736	0.108	0.01644	7.16e-11	18139	10
	rs33951980	rs33951980	chr7:73029437	C/T	rs71556736	chr7:73034929	C/T	0.991	1	1	Glycoprotein acetyls mainly a1Lacid glycoprotein	Kettunen J	27005778	2016	European	Kettunen J	C	C/T	0.8749	0.1039	0.01575	7.18e-11	19268	11
	rs33951980	rs33951980	chr7:73029437	C/T	rs13229619	chr7:73030175	G/A	0.972	0.99	1	Glycoprotein acetyls mainly a1Lacid glycoprotein	Kettunen J	27005778	2016	European	Kettunen J	G	G/A	0.8762	0.1041	0.01578	7.35e-11	19267	11
	rs33951980	rs33951980	chr7:73029437	C/T	rs3812316	chr7:73020337	C/G	0.953	0.99	1	Phospholipids in large VLDL	Kettunen J	27005778	2016	European	Kettunen J	C	C/G	0.8743	0.1083	0.0165	7.46e-11	18136	10
	rs33951980	rs33951980	chr7:73029437	C/T	rs34062580	chr7:73033559	G/A	0.991	1	1	Glycoprotein acetyls mainly a1Lacid glycoprotein	Kettunen J	27005778	2016	European	Kettunen J	G	G/A	0.8761	0.1041	0.01579	7.47e-11	19265	11
	rs33951980	rs33951980	chr7:73029437	C/T	rs13234131	chr7:73025975	A/G	0.962	1	1	Phospholipids in large VLDL	Kettunen J	27005778	2016	European	Kettunen J	A	A/G	0.8732	0.1084	0.01652	7.53e-11	18138	10
	rs33951980	rs33951980	chr7:73029437	C/T	rs34060476	chr7:73037956	A/G	0.963	1	1	Glycoprotein acetyls mainly a1Lacid glycoprotein	Kettunen J	27005778	2016	European	Kettunen J	A	A/G	0.8761	0.1041	0.0158	7.71e-11	19269	11
	rs33951980	rs33951980	chr7:73029437	C/T	rs13240065	chr7:73015369	G/A	0.944	0.972	1	Free cholesterol in small VLDL	Kettunen J	27005778	2016	European	Kettunen J	G	G/A	0.8747	0.09925	0.01507	7.98e-11	21554	12
	rs33951980	rs33951980	chr7:73029437	C/T	rs33951980	chr7:73029437	C/T	1	1	0	Phospholipids in large VLDL	Kettunen J	27005778	2016	European	Kettunen J	C	C/T	0.8727	0.108	0.01652	8.96e-11	18137	10
	rs33951980	rs33951980	chr7:73029437	C/T	rs13246993	chr7:73022746	G/A	0.962	1	1	Free cholesterol in small VLDL	Kettunen J	27005778	2016	European	Kettunen J	G	G/A	0.8741	0.09918	0.01513	9.63e-11	21554	12
	rs1260326	rs1260326	chr2:27730940	C/T	rs780093	chr2:27742603	C/T	0.908	0.955	1	Total lipids in chylomicrons and extremely large VLDL	Kettunen J	27005778	2016	European	Kettunen J	C	C/T	0.6337	-0.06952	0.01069	1e-10	18958	11
	rs1260326	rs1260326	chr2:27730940	C/T	rs11127048	chr2:27752463	A/G	0.82	0.913	1	Triglycerides in medium VLDL	Kettunen J	27005778	2016	European	Kettunen J	A	A/G	0.577	-0.06877	0.01055	1.01e-10	21239	12
	rs33951980	rs33951980	chr7:73029437	C/T	rs13240065	chr7:73015369	G/A	0.944	0.972	1	Phospholipids in small VLDL	Kettunen J	27005778	2016	European	Kettunen J	G	G/A	0.8747	0.09874	0.01508	1.03e-10	21546	12
	rs33951980	rs33951980	chr7:73029437	C/T	rs3812316	chr7:73020337	C/G	0.953	0.99	1	Free cholesterol in small VLDL	Kettunen J	27005778	2016	European	Kettunen J	C	C/G	0.8753	0.09894	0.01512	1.05e-10	21554	12
	rs1260326	rs1260326	chr2:27730940	C/T	rs780094	chr2:27741237	C/T	0.912	0.955	1	Total lipids in small HDL	Kettunen J	27005778	2016	European	Kettunen J	C	C/T	0.6305	-0.06849	0.01056	1.15e-10	19273	11
	rs33951980	rs33951980	chr7:73029437	C/T	rs3812316	chr7:73020337	C/G	0.953	0.99	1	Concentration of chylomicrons and extremely large VLDL particles	Kettunen J	27005778	2016	European	Kettunen J	C	C/G	0.8766	0.1055	0.01621	1.16e-10	18247	10
	rs1260326	rs1260326	chr2:27730940	C/T	rs1260326	chr2:27730940	C/T	1	1	0	Total lipids in small LDL	Kettunen J	27005778	2016	European	Kettunen J	C	C/T	0.6366	-0.06956	0.01063	1.21e-10	19273	11
	rs1260326	rs1260326	chr2:27730940	C/T	rs4665972	chr2:27598097	C/T	0.869	0.942	1	Total cholesterol in small VLDL	Kettunen J	27005778	2016	European	Kettunen J	C	C/T	0.6087	-0.06726	0.01032	1.21e-10	21554	12
	rs1260326	rs1260326	chr2:27730940	C/T	rs1260326	chr2:27730940	C/T	1	1	0	18:2 linoleic acid (LA)	Kettunen J	27005778	2016	European	Kettunen J	C	C/T	0.6367	-0.08218	0.01269	1.28e-10	13527	10
	rs33951980	rs33951980	chr7:73029437	C/T	rs13234378	chr7:73026151	A/T	0.962	1	1	Free cholesterol in small VLDL	Kettunen J	27005778	2016	European	Kettunen J	A	A/T	0.875	0.09867	0.01516	1.31e-10	21555	12
	rs33951980	rs33951980	chr7:73029437	C/T	rs34062580	chr7:73033559	G/A	0.991	1	1	Phospholipids in large VLDL	Kettunen J	27005778	2016	European	Kettunen J	G	G/A	0.8866	0.1069	0.01651	1.34e-10	20527	11
	rs33951980	rs33951980	chr7:73029437	C/T	rs13246993	chr7:73022746	G/A	0.962	1	1	Concentration of chylomicrons and extremely large VLDL particles	Kettunen J	27005778	2016	European	Kettunen J	G	G/A	0.8767	0.1052	0.01624	1.42e-10	18247	10
	rs33951980	rs33951980	chr7:73029437	C/T	rs3812316	chr7:73020337	C/G	0.953	0.99	1	Phospholipids in small VLDL	Kettunen J	27005778	2016	European	Kettunen J	C	C/G	0.8753	0.09823	0.01513	1.47e-10	21546	12
	rs33951980	rs33951980	chr7:73029437	C/T	rs33951980	chr7:73029437	C/T	1	1	0	Free cholesterol in small VLDL	Kettunen J	27005778	2016	European	Kettunen J	C	C/T	0.8739	0.0983	0.01515	1.48e-10	21554	12
	rs1260326	rs1260326	chr2:27730940	C/T	rs11127048	chr2:27752463	A/G	0.82	0.913	1	Concentration of small VLDL particles	Kettunen J	27005778	2016	European	Kettunen J	A	A/G	0.5713	-0.07048	0.01084	1.5e-10	19272	11
	rs33951980	rs33951980	chr7:73029437	C/T	rs13246993	chr7:73022746	G/A	0.962	1	1	Phospholipids in small VLDL	Kettunen J	27005778	2016	European	Kettunen J	G	G/A	0.8741	0.09822	0.01514	1.51e-10	21546	12
	rs1260326	rs1260326	chr2:27730940	C/T	rs4665972	chr2:27598097	C/T	0.869	0.942	1	Total lipids in chylomicrons and extremely large VLDL	Kettunen J	27005778	2016	European	Kettunen J	C	C/T	0.6036	-0.06938	0.01077	1.52e-10	18957	11
	rs33951980	rs33951980	chr7:73029437	C/T	rs71556736	chr7:73034929	C/T	0.991	1	1	Phospholipids in large VLDL	Kettunen J	27005778	2016	European	Kettunen J	C	C/T	0.8707	0.1061	0.01647	1.64e-10	18139	10
	rs1260326	rs1260326	chr2:27730940	C/T	rs11127048	chr2:27752463	A/G	0.82	0.913	1	Total lipids in medium VLDL	Kettunen J	27005778	2016	European	Kettunen J	A	A/G	0.5713	-0.07002	0.01084	1.69e-10	19272	11
	rs33951980	rs33951980	chr7:73029437	C/T	rs13234378	chr7:73026151	A/T	0.962	1	1	Phospholipids in small VLDL	Kettunen J	27005778	2016	European	Kettunen J	A	A/T	0.875	0.0981	0.01517	1.72e-10	21547	12
	rs33951980	rs33951980	chr7:73029437	C/T	rs13234378	chr7:73026151	A/T	0.962	1	1	Concentration of chylomicrons and extremely large VLDL particles	Kettunen J	27005778	2016	European	Kettunen J	A	A/T	0.8763	0.1048	0.01625	1.73e-10	18249	10
	rs33951980	rs33951980	chr7:73029437	C/T	rs13234131	chr7:73025975	A/G	0.962	1	1	Free cholesterol in small VLDL	Kettunen J	27005778	2016	European	Kettunen J	A	A/G	0.8743	0.0979	0.01514	1.74e-10	21553	12
	rs33951980	rs33951980	chr7:73029437	C/T	rs13234131	chr7:73025975	A/G	0.962	1	1	Concentration of chylomicrons and extremely large VLDL particles	Kettunen J	27005778	2016	European	Kettunen J	A	A/G	0.8756	0.1046	0.01623	1.76e-10	18248	10
	rs33951980	rs33951980	chr7:73029437	C/T	rs13240065	chr7:73015369	G/A	0.944	0.972	1	Total lipids in small VLDL	Kettunen J	27005778	2016	European	Kettunen J	G	G/A	0.8764	0.1012	0.01568	2e-10	19268	11
	rs33951980	rs33951980	chr7:73029437	C/T	rs33951980	chr7:73029437	C/T	1	1	0	Phospholipids in small VLDL	Kettunen J	27005778	2016	European	Kettunen J	C	C/T	0.8739	0.09744	0.01516	2.19e-10	21546	12
	rs33951980	rs33951980	chr7:73029437	C/T	rs13234131	chr7:73025975	A/G	0.962	1	1	Phospholipids in small VLDL	Kettunen J	27005778	2016	European	Kettunen J	A	A/G	0.8743	0.09738	0.01516	2.25e-10	21545	12
	rs1260326	rs1260326	chr2:27730940	C/T	rs1260326	chr2:27730940	C/T	1	1	0	ApoB	Kettunen J	27005778	2016	European	Kettunen J	C	C/T	0.6386	-0.06678	0.01039	2.51e-10	20690	12
	rs33951980	rs33951980	chr7:73029437	C/T	rs3812316	chr7:73020337	C/G	0.953	0.99	1	Total lipids in very large VLDL	Kettunen J	27005778	2016	European	Kettunen J	C	C/G	0.8766	0.1003	0.01571	2.53e-10	19268	11
	rs1260326	rs1260326	chr2:27730940	C/T	rs780094	chr2:27741237	C/T	0.912	0.955	1	Triglycerides in small HDL	Kettunen J	27005778	2016	European	Kettunen J	C	C/T	0.6332	-0.06504	0.01017	2.58e-10	21558	12
	rs33951980	rs33951980	chr7:73029437	C/T	rs13240065	chr7:73015369	G/A	0.944	0.972	1	Total lipids in very large VLDL	Kettunen J	27005778	2016	European	Kettunen J	G	G/A	0.8764	0.1	0.01567	2.61e-10	19268	11
	rs33951980	rs33951980	chr7:73029437	C/T	rs13246993	chr7:73022746	G/A	0.962	1	1	Total lipids in small VLDL	Kettunen J	27005778	2016	European	Kettunen J	G	G/A	0.8767	0.101	0.01574	2.63e-10	19268	11
	rs33951980	rs33951980	chr7:73029437	C/T	rs13229619	chr7:73030175	G/A	0.972	0.99	1	Free cholesterol in small VLDL	Kettunen J	27005778	2016	European	Kettunen J	G	G/A	0.8734	0.09698	0.01515	2.64e-10	21557	12
	rs33951980	rs33951980	chr7:73029437	C/T	rs71556736	chr7:73034929	C/T	0.991	1	1	Free cholesterol in small VLDL	Kettunen J	27005778	2016	European	Kettunen J	C	C/T	0.8722	0.09678	0.01512	2.65e-10	21557	12
	rs33951980	rs33951980	chr7:73029437	C/T	rs34062580	chr7:73033559	G/A	0.991	1	1	Free cholesterol in small VLDL	Kettunen J	27005778	2016	European	Kettunen J	G	G/A	0.8734	0.09702	0.01516	2.66e-10	21554	12
	rs33951980	rs33951980	chr7:73029437	C/T	rs34060476	chr7:73037956	A/G	0.963	1	1	Free cholesterol in small VLDL	Kettunen J	27005778	2016	European	Kettunen J	A	A/G	0.8734	0.09703	0.01517	2.7e-10	21558	12
	rs33951980	rs33951980	chr7:73029437	C/T	rs13240065	chr7:73015369	G/A	0.944	0.972	1	Triglycerides in small VLDL	Kettunen J	27005778	2016	European	Kettunen J	G	G/A	0.6973	0.1021	0.01596	2.71e-10	21553	12
	rs33951980	rs33951980	chr7:73029437	C/T	rs33951980	chr7:73029437	C/T	1	1	0	Concentration of chylomicrons and extremely large VLDL particles	Kettunen J	27005778	2016	European	Kettunen J	C	C/T	0.876	0.1037	0.01626	2.76e-10	18247	10
	rs1260326	rs1260326	chr2:27730940	C/T	rs11127048	chr2:27752463	A/G	0.82	0.913	1	Concentration of medium VLDL particles	Kettunen J	27005778	2016	European	Kettunen J	A	A/G	0.5713	-0.06945	0.01085	2.78e-10	19272	11
	rs33951980	rs33951980	chr7:73029437	C/T	rs13246993	chr7:73022746	G/A	0.962	1	1	Total lipids in very large VLDL	Kettunen J	27005778	2016	European	Kettunen J	G	G/A	0.8767	0.1003	0.01574	2.82e-10	19268	11
	rs33951980	rs33951980	chr7:73029437	C/T	rs3812316	chr7:73020337	C/G	0.953	0.99	1	Total lipids in small VLDL	Kettunen J	27005778	2016	European	Kettunen J	C	C/G	0.8766	0.1006	0.01572	2.87e-10	19268	11
	rs33951980	rs33951980	chr7:73029437	C/T	rs13234378	chr7:73026151	A/T	0.962	1	1	Total lipids in very large VLDL	Kettunen J	27005778	2016	European	Kettunen J	A	A/T	0.8763	0.1002	0.01575	2.98e-10	19269	11
	rs1260326	rs1260326	chr2:27730940	C/T	rs780094	chr2:27741237	C/T	0.912	0.955	1	Concentration of small LDL particles	Kettunen J	27005778	2016	European	Kettunen J	C	C/T	0.6305	-0.06769	0.01058	3.07e-10	19273	11
	rs33951980	rs33951980	chr7:73029437	C/T	rs13234131	chr7:73025975	A/G	0.962	1	1	Total lipids in very large VLDL	Kettunen J	27005778	2016	European	Kettunen J	A	A/G	0.8756	0.09996	0.01573	3.11e-10	19267	11
	rs1260326	rs1260326	chr2:27730940	C/T	rs11127048	chr2:27752463	A/G	0.82	0.913	1	Total lipids in small VLDL	Kettunen J	27005778	2016	European	Kettunen J	A	A/G	0.5713	-0.06914	0.01085	3.36e-10	19272	11
	rs33951980	rs33951980	chr7:73029437	C/T	rs13234378	chr7:73026151	A/T	0.962	1	1	Total lipids in small VLDL	Kettunen J	27005778	2016	European	Kettunen J	A	A/T	0.8763	0.1003	0.01576	3.54e-10	19269	11
	rs1260326	rs1260326	chr2:27730940	C/T	rs11127048	chr2:27752463	A/G	0.82	0.913	1	Free cholesterol in small VLDL	Kettunen J	27005778	2016	European	Kettunen J	A	A/G	0.5763	-0.0665	0.01047	3.57e-10	21558	12
	rs33951980	rs33951980	chr7:73029437	C/T	rs33951980	chr7:73029437	C/T	1	1	0	Total lipids in very large VLDL	Kettunen J	27005778	2016	European	Kettunen J	C	C/T	0.876	0.09976	0.01576	3.66e-10	19268	11
	rs33951980	rs33951980	chr7:73029437	C/T	rs71556736	chr7:73034929	C/T	0.991	1	1	Concentration of chylomicrons and extremely large VLDL particles	Kettunen J	27005778	2016	European	Kettunen J	C	C/T	0.8749	0.1028	0.01625	3.81e-10	18250	10
	rs33951980	rs33951980	chr7:73029437	C/T	rs13229619	chr7:73030175	G/A	0.972	0.99	1	Concentration of chylomicrons and extremely large VLDL particles	Kettunen J	27005778	2016	European	Kettunen J	G	G/A	0.8762	0.1029	0.01628	3.84e-10	18250	10
	rs33951980	rs33951980	chr7:73029437	C/T	rs71556736	chr7:73034929	C/T	0.991	1	1	Phospholipids in small VLDL	Kettunen J	27005778	2016	European	Kettunen J	C	C/T	0.8723	0.09594	0.01514	3.9e-10	21549	12
	rs33951980	rs33951980	chr7:73029437	C/T	rs34062580	chr7:73033559	G/A	0.991	1	1	Concentration of chylomicrons and extremely large VLDL particles	Kettunen J	27005778	2016	European	Kettunen J	G	G/A	0.8761	0.1029	0.01629	3.97e-10	18248	10
	rs33951980	rs33951980	chr7:73029437	C/T	rs34060476	chr7:73037956	A/G	0.963	1	1	Concentration of chylomicrons and extremely large VLDL particles	Kettunen J	27005778	2016	European	Kettunen J	A	A/G	0.8761	0.1028	0.0163	4.22e-10	18251	10
	rs33951980	rs33951980	chr7:73029437	C/T	rs33951980	chr7:73029437	C/T	1	1	0	Total lipids in small VLDL	Kettunen J	27005778	2016	European	Kettunen J	C	C/T	0.876	0.09993	0.01577	4.25e-10	19268	11
	rs33951980	rs33951980	chr7:73029437	C/T	rs13229619	chr7:73030175	G/A	0.972	0.99	1	Phospholipids in small VLDL	Kettunen J	27005778	2016	European	Kettunen J	G	G/A	0.8734	0.09593	0.01516	4.25e-10	21549	12
	rs33951980	rs33951980	chr7:73029437	C/T	rs34062580	chr7:73033559	G/A	0.991	1	1	Phospholipids in small VLDL	Kettunen J	27005778	2016	European	Kettunen J	G	G/A	0.8734	0.09597	0.01517	4.26e-10	21546	12
	rs1260326	rs1260326	chr2:27730940	C/T	rs11127048	chr2:27752463	A/G	0.82	0.913	1	Leucine	Kettunen J	27005778	2016	European	Kettunen J	A	A/G	0.5817	-0.0617	0.00987	4.32e-10	24727	14
	rs1260326	rs1260326	chr2:27730940	C/T	rs780094	chr2:27741237	C/T	0.912	0.955	1	Serum total cholesterol	Kettunen J	27005778	2016	European	Kettunen J	C	C/T	0.6332	-0.06406	0.01016	4.34e-10	21491	12
	rs33951980	rs33951980	chr7:73029437	C/T	rs34060476	chr7:73037956	A/G	0.963	1	1	Phospholipids in small VLDL	Kettunen J	27005778	2016	European	Kettunen J	A	A/G	0.8734	0.09594	0.01518	4.41e-10	21550	12
	rs33951980	rs33951980	chr7:73029437	C/T	rs13229619	chr7:73030175	G/A	0.972	0.99	1	Phospholipids in large VLDL	Kettunen J	27005778	2016	European	Kettunen J	G	G/A	0.8803	0.1006	0.016	4.47e-10	20529	11
	rs33951980	rs33951980	chr7:73029437	C/T	rs13234131	chr7:73025975	A/G	0.962	1	1	Total lipids in small VLDL	Kettunen J	27005778	2016	European	Kettunen J	A	A/G	0.8756	0.09955	0.01574	4.57e-10	19267	11
	rs33951980	rs33951980	chr7:73029437	C/T	rs13246993	chr7:73022746	G/A	0.962	1	1	Phospholipids in chylomicrons and extremely large VLDL	Kettunen J	27005778	2016	European	Kettunen J	G	G/A	0.8741	0.09492	0.01517	4.97e-10	21537	12
	rs1260326	rs1260326	chr2:27730940	C/T	rs780093	chr2:27742603	C/T	0.908	0.955	1	Total lipids in small HDL	Kettunen J	27005778	2016	European	Kettunen J	C	C/T	0.6333	-0.06622	0.01059	5.1e-10	19271	11
	rs33951980	rs33951980	chr7:73029437	C/T	rs13234131	chr7:73025975	A/G	0.962	1	1	Phospholipids in chylomicrons and extremely large VLDL	Kettunen J	27005778	2016	European	Kettunen J	A	A/G	0.8744	0.09486	0.01518	5.29e-10	21536	12
	rs1260326	rs1260326	chr2:27730940	C/T	rs4665972	chr2:27598097	C/T	0.869	0.942	1	Pyruvate	Kettunen J	27005778	2016	European	Kettunen J	C	C/T	0.6089	-0.06016	0.009687	5.46e-10	24752	14
	rs1260326	rs1260326	chr2:27730940	C/T	rs780093	chr2:27742603	C/T	0.908	0.955	1	Concentration of small LDL particles	Kettunen J	27005778	2016	European	Kettunen J	C	C/T	0.6333	-0.06681	0.01059	5.48e-10	19271	11
	rs33951980	rs33951980	chr7:73029437	C/T	rs33951980	chr7:73029437	C/T	1	1	0	Phospholipids in chylomicrons and extremely large VLDL	Kettunen J	27005778	2016	European	Kettunen J	C	C/T	0.8739	0.09471	0.01518	5.64e-10	21537	12
	rs1260326	rs1260326	chr2:27730940	C/T	rs780093	chr2:27742603	C/T	0.908	0.955	1	Serum total cholesterol	Kettunen J	27005778	2016	European	Kettunen J	C	C/T	0.6361	-0.06367	0.01017	5.68e-10	21489	12
	rs33951980	rs33951980	chr7:73029437	C/T	rs71556736	chr7:73034929	C/T	0.991	1	1	Total lipids in very large VLDL	Kettunen J	27005778	2016	European	Kettunen J	C	C/T	0.8749	0.09857	0.01574	5.69e-10	19271	11
	rs1260326	rs1260326	chr2:27730940	C/T	rs11127048	chr2:27752463	A/G	0.82	0.913	1	Phospholipids in chylomicrons and extremely large VLDL	Kettunen J	27005778	2016	European	Kettunen J	A	A/G	0.5763	-0.06541	0.01049	5.77e-10	21541	12
	rs33951980	rs33951980	chr7:73029437	C/T	rs13234378	chr7:73026151	A/T	0.962	1	1	Phospholipids in chylomicrons and extremely large VLDL	Kettunen J	27005778	2016	European	Kettunen J	A	A/T	0.8751	0.09474	0.0152	5.8e-10	21538	12
	rs33951980	rs33951980	chr7:73029437	C/T	rs34060476	chr7:73037956	A/G	0.963	1	1	Total lipids in very large VLDL	Kettunen J	27005778	2016	European	Kettunen J	A	A/G	0.8761	0.09879	0.0158	5.93e-10	19272	11
	rs33951980	rs33951980	chr7:73029437	C/T	rs34062580	chr7:73033559	G/A	0.991	1	1	Total lipids in very large VLDL	Kettunen J	27005778	2016	European	Kettunen J	G	G/A	0.8762	0.09866	0.01578	6.06e-10	19268	11
	rs1260326	rs1260326	chr2:27730940	C/T	rs4665972	chr2:27598097	C/T	0.869	0.942	1	Concentration of small LDL particles	Kettunen J	27005778	2016	European	Kettunen J	C	C/T	0.6034	-0.06714	0.01067	6.1e-10	19270	11
	rs33951980	rs33951980	chr7:73029437	C/T	rs13229619	chr7:73030175	G/A	0.972	0.99	1	Total lipids in very large VLDL	Kettunen J	27005778	2016	European	Kettunen J	G	G/A	0.8762	0.09857	0.01578	6.14e-10	19271	11
	rs33951980	rs33951980	chr7:73029437	C/T	rs3812316	chr7:73020337	C/G	0.953	0.99	1	Phospholipids in chylomicrons and extremely large VLDL	Kettunen J	27005778	2016	European	Kettunen J	C	C/G	0.8753	0.09411	0.01516	6.83e-10	21537	12
	rs33951980	rs33951980	chr7:73029437	C/T	rs71556736	chr7:73034929	C/T	0.991	1	1	Total lipids in small VLDL	Kettunen J	27005778	2016	European	Kettunen J	C	C/T	0.8749	0.09866	0.01576	6.84e-10	19271	11
	rs33951980	rs33951980	chr7:73029437	C/T	rs13229619	chr7:73030175	G/A	0.972	0.99	1	Total lipids in small VLDL	Kettunen J	27005778	2016	European	Kettunen J	G	G/A	0.8762	0.09855	0.01579	7.67e-10	19271	11
	rs33951980	rs33951980	chr7:73029437	C/T	rs34062580	chr7:73033559	G/A	0.991	1	1	Total lipids in small VLDL	Kettunen J	27005778	2016	European	Kettunen J	G	G/A	0.8762	0.09858	0.01579	7.76e-10	19268	11
	rs33951980	rs33951980	chr7:73029437	C/T	rs34060476	chr7:73037956	A/G	0.963	1	1	Total lipids in small VLDL	Kettunen J	27005778	2016	European	Kettunen J	A	A/G	0.8761	0.09858	0.01581	7.99e-10	19272	11
	rs33951980	rs33951980	chr7:73029437	C/T	rs71556736	chr7:73034929	C/T	0.991	1	1	Phospholipids in chylomicrons and extremely large VLDL	Kettunen J	27005778	2016	European	Kettunen J	C	C/T	0.8723	0.09347	0.01516	8.91e-10	21540	12
	rs33951980	rs33951980	chr7:73029437	C/T	rs34060476	chr7:73037956	A/G	0.963	1	1	Phospholipids in chylomicrons and extremely large VLDL	Kettunen J	27005778	2016	European	Kettunen J	A	A/G	0.8734	0.09361	0.01521	9.48e-10	21541	12
	rs1260326	rs1260326	chr2:27730940	C/T	rs1260326	chr2:27730940	C/T	1	1	0	OmegaL6 fatty acids	Kettunen J	27005778	2016	European	Kettunen J	C	C/T	0.6368	-0.07798	0.01272	9.73e-10	13506	10
	rs33951980	rs33951980	chr7:73029437	C/T	rs34062580	chr7:73033559	G/A	0.991	1	1	Phospholipids in chylomicrons and extremely large VLDL	Kettunen J	27005778	2016	European	Kettunen J	G	G/A	0.8734	0.09347	0.0152	9.84e-10	21537	12
	rs1260326	rs1260326	chr2:27730940	C/T	rs1260326	chr2:27730940	C/T	1	1	0	Glutamine	Kettunen J	27005778	2016	European	Kettunen J	C	C/T	0.639	0.06167	0.01008	9.87e-10	22235	13
	rs33951980	rs33951980	chr7:73029437	C/T	rs13229619	chr7:73030175	G/A	0.972	0.99	1	Phospholipids in chylomicrons and extremely large VLDL	Kettunen J	27005778	2016	European	Kettunen J	G	G/A	0.8734	0.09338	0.01519	1e-09	21540	12
	rs1260326	rs1260326	chr2:27730940	C/T	rs780093	chr2:27742603	C/T	0.908	0.955	1	Triglycerides in small HDL	Kettunen J	27005778	2016	European	Kettunen J	C	C/T	0.6362	-0.06273	0.01017	1.08e-09	21556	12
	rs1260326	rs1260326	chr2:27730940	C/T	rs1260326	chr2:27730940	C/T	1	1	0	Other polyunsaturated fatty acids than 18:2	Kettunen J	27005778	2016	European	Kettunen J	C	C/T	0.6367	-0.07775	0.01267	1.13e-09	13549	10
	rs33951980	rs33951980	chr7:73029437	C/T	rs13240065	chr7:73015369	G/A	0.944	0.972	1	Phospholipids in chylomicrons and extremely large VLDL	Kettunen J	27005778	2016	European	Kettunen J	G	G/A	0.8747	0.09247	0.01511	1.19e-09	21537	12
	rs33951980	rs33951980	chr7:73029437	C/T	rs13240065	chr7:73015369	G/A	0.944	0.972	1	Concentration of very large VLDL particles	Kettunen J	27005778	2016	European	Kettunen J	G	G/A	0.8766	0.09816	0.01603	1.28e-09	18441	10
	rs1260326	rs1260326	chr2:27730940	C/T	rs4665972	chr2:27598097	C/T	0.869	0.942	1	18:2 linoleic acid (LA)	Kettunen J	27005778	2016	European	Kettunen J	C	C/T	0.6008	-0.07786	0.01274	1.31e-09	13524	10
	rs1260326	rs1260326	chr2:27730940	C/T	rs11127048	chr2:27752463	A/G	0.82	0.913	1	Cholesterol esters in medium VLDL	Kettunen J	27005778	2016	European	Kettunen J	A	A/G	0.5713	-0.06667	0.01085	1.37e-09	19272	11
	rs1260326	rs1260326	chr2:27730940	C/T	rs1260326	chr2:27730940	C/T	1	1	0	LDL diameter	Kettunen J	27005778	2016	European	Kettunen J	C	C/T	0.6366	0.06494	0.01064	1.39e-09	19273	11
	rs33951980	rs33951980	chr7:73029437	C/T	rs13246993	chr7:73022746	G/A	0.962	1	1	Triglycerides in chylomicrons and extremely large VLDL	Kettunen J	27005778	2016	European	Kettunen J	G	G/A	0.8741	0.09195	0.01514	1.52e-09	21535	12
	rs33951980	rs33951980	chr7:73029437	C/T	rs71556736	chr7:73034929	C/T	0.991	1	1	Concentration of very large VLDL particles	Kettunen J	27005778	2016	European	Kettunen J	C	C/T	0.8637	0.09474	0.01558	1.64e-09	18959	11
	rs33951980	rs33951980	chr7:73029437	C/T	rs3812316	chr7:73020337	C/G	0.953	0.99	1	Triglycerides in chylomicrons and extremely large VLDL	Kettunen J	27005778	2016	European	Kettunen J	C	C/G	0.8753	0.09165	0.01513	1.69e-09	21535	12
	rs33951980	rs33951980	chr7:73029437	C/T	rs34060476	chr7:73037956	A/G	0.963	1	1	Phospholipids in large VLDL	Kettunen J	27005778	2016	European	Kettunen J	A	A/G	0.8682	0.09256	0.01525	1.73e-09	20530	11
	rs1260326	rs1260326	chr2:27730940	C/T	rs780094	chr2:27741237	C/T	0.912	0.955	1	18:2 linoleic acid (LA)	Kettunen J	27005778	2016	European	Kettunen J	C	C/T	0.63	-0.0762	0.01261	1.95e-09	13527	10
	rs33951980	rs33951980	chr7:73029437	C/T	rs13240065	chr7:73015369	G/A	0.944	0.972	1	Cholesterol esters in medium VLDL	Kettunen J	27005778	2016	European	Kettunen J	G	G/A	0.8764	0.09541	0.01569	2.01e-09	19268	11
	rs33951980	rs33951980	chr7:73029437	C/T	rs13234131	chr7:73025975	A/G	0.962	1	1	Triglycerides in chylomicrons and extremely large VLDL	Kettunen J	27005778	2016	European	Kettunen J	A	A/G	0.8744	0.09125	0.01515	2.1e-09	21534	12
	rs1260326	rs1260326	chr2:27730940	C/T	rs11127048	chr2:27752463	A/G	0.82	0.913	1	Glycoprotein acetyls mainly a1Lacid glycoprotein	Kettunen J	27005778	2016	European	Kettunen J	A	A/G	0.5713	-0.06568	0.01084	2.2e-09	19269	11
	rs33951980	rs33951980	chr7:73029437	C/T	rs13234378	chr7:73026151	A/T	0.962	1	1	Triglycerides in chylomicrons and extremely large VLDL	Kettunen J	27005778	2016	European	Kettunen J	A	A/T	0.8751	0.09122	0.01517	2.2e-09	21536	12
	rs33951980	rs33951980	chr7:73029437	C/T	rs33951980	chr7:73029437	C/T	1	1	0	Triglycerides in chylomicrons and extremely large VLDL	Kettunen J	27005778	2016	European	Kettunen J	C	C/T	0.8739	0.0911	0.01515	2.23e-09	21535	12
	rs33951980	rs33951980	chr7:73029437	C/T	rs13240065	chr7:73015369	G/A	0.944	0.972	1	Triglycerides in chylomicrons and extremely large VLDL	Kettunen J	27005778	2016	European	Kettunen J	G	G/A	0.8748	0.09061	0.01508	2.28e-09	21535	12
	rs1260326	rs1260326	chr2:27730940	C/T	rs11127048	chr2:27752463	A/G	0.82	0.913	1	Concentration of small HDL particles	Kettunen J	27005778	2016	European	Kettunen J	A	A/G	0.5713	-0.06493	0.01084	2.74e-09	19272	11
	rs33951980	rs33951980	chr7:73029437	C/T	rs34060476	chr7:73037956	A/G	0.963	1	1	Triglycerides in small VLDL	Kettunen J	27005778	2016	European	Kettunen J	A	A/G	0.7142	0.09073	0.01506	2.74e-09	21557	12
	rs33951980	rs33951980	chr7:73029437	C/T	rs13246993	chr7:73022746	G/A	0.962	1	1	Cholesterol esters in medium VLDL	Kettunen J	27005778	2016	European	Kettunen J	G	G/A	0.8767	0.09476	0.01576	3.01e-09	19268	11
	rs33951980	rs33951980	chr7:73029437	C/T	rs3812316	chr7:73020337	C/G	0.953	0.99	1	Cholesterol esters in medium VLDL	Kettunen J	27005778	2016	European	Kettunen J	C	C/G	0.8766	0.09453	0.01573	3.07e-09	19268	11
	rs1260326	rs1260326	chr2:27730940	C/T	rs4665972	chr2:27598097	C/T	0.869	0.942	1	Glutamine	Kettunen J	27005778	2016	European	Kettunen J	C	C/T	0.6092	0.05812	0.009802	3.12e-09	24460	14
	rs1260326	rs1260326	chr2:27730940	C/T	rs4665972	chr2:27598097	C/T	0.869	0.942	1	Triglycerides in small HDL	Kettunen J	27005778	2016	European	Kettunen J	C	C/T	0.6087	-0.06192	0.01035	3.3e-09	21555	12
	rs1260326	rs1260326	chr2:27730940	C/T	rs11127048	chr2:27752463	A/G	0.82	0.913	1	Total lipids in very large VLDL	Kettunen J	27005778	2016	European	Kettunen J	A	A/G	0.5713	-0.0647	0.01083	3.35e-09	19272	11
	rs33951980	rs33951980	chr7:73029437	C/T	rs13234131	chr7:73025975	A/G	0.962	1	1	Concentration of very large VLDL particles	Kettunen J	27005778	2016	European	Kettunen J	A	A/G	0.8757	0.09597	0.01609	3.35e-09	18440	10
	rs33951980	rs33951980	chr7:73029437	C/T	rs13229619	chr7:73030175	G/A	0.972	0.99	1	Triglycerides in chylomicrons and extremely large VLDL	Kettunen J	27005778	2016	European	Kettunen J	G	G/A	0.8734	0.09011	0.01516	3.39e-09	21538	12
	rs33951980	rs33951980	chr7:73029437	C/T	rs34062580	chr7:73033559	G/A	0.991	1	1	Triglycerides in chylomicrons and extremely large VLDL	Kettunen J	27005778	2016	European	Kettunen J	G	G/A	0.8734	0.09013	0.01517	3.42e-09	21535	12
	rs33951980	rs33951980	chr7:73029437	C/T	rs34060476	chr7:73037956	A/G	0.963	1	1	Triglycerides in chylomicrons and extremely large VLDL	Kettunen J	27005778	2016	European	Kettunen J	A	A/G	0.8734	0.09015	0.01518	3.45e-09	21539	12
	rs1260326	rs1260326	chr2:27730940	C/T	rs780093	chr2:27742603	C/T	0.908	0.955	1	18:2 linoleic acid (LA)	Kettunen J	27005778	2016	European	Kettunen J	C	C/T	0.6323	-0.07501	0.01263	3.74e-09	13524	10
	rs1260326	rs1260326	chr2:27730940	C/T	rs780094	chr2:27741237	C/T	0.912	0.955	1	Glutamine	Kettunen J	27005778	2016	European	Kettunen J	C	C/T	0.6347	0.05922	0.01004	3.75e-09	22235	13
	rs33951980	rs33951980	chr7:73029437	C/T	rs13234378	chr7:73026151	A/T	0.962	1	1	Concentration of very large VLDL particles	Kettunen J	27005778	2016	European	Kettunen J	A	A/T	0.8765	0.09568	0.01611	3.9e-09	18442	10
	rs33951980	rs33951980	chr7:73029437	C/T	rs13234378	chr7:73026151	A/T	0.962	1	1	Cholesterol esters in medium VLDL	Kettunen J	27005778	2016	European	Kettunen J	A	A/T	0.8763	0.09407	0.01577	4.01e-09	19269	11
	rs1260326	rs1260326	chr2:27730940	C/T	rs11127048	chr2:27752463	A/G	0.82	0.913	1	Concentration of chylomicrons and extremely large VLDL particles	Kettunen J	27005778	2016	European	Kettunen J	A	A/G	0.572	-0.06521	0.01098	4.06e-09	18958	11
	rs1260326	rs1260326	chr2:27730940	C/T	rs4665972	chr2:27598097	C/T	0.869	0.942	1	ApoB	Kettunen J	27005778	2016	European	Kettunen J	C	C/T	0.6086	-0.06288	0.01053	4.07e-09	20689	12
	rs33951980	rs33951980	chr7:73029437	C/T	rs71556736	chr7:73034929	C/T	0.991	1	1	Triglycerides in chylomicrons and extremely large VLDL	Kettunen J	27005778	2016	European	Kettunen J	C	C/T	0.8723	0.08944	0.01513	4.12e-09	21538	12
	rs1260326	rs1260326	chr2:27730940	C/T	rs1260326	chr2:27730940	C/T	1	1	0	Total cholesterol in small LDL	Kettunen J	27005778	2016	European	Kettunen J	C	C/T	0.6389	-0.06066	0.01019	4.29e-09	21556	12
	rs1260326	rs1260326	chr2:27730940	C/T	rs11127048	chr2:27752463	A/G	0.82	0.913	1	Concentration of very large VLDL particles	Kettunen J	27005778	2016	European	Kettunen J	A	A/G	0.572	-0.06472	0.01093	4.4e-09	18958	11
	rs1260326	rs1260326	chr2:27730940	C/T	rs1260326	chr2:27730940	C/T	1	1	0	3-methyl-2-oxovalerate	Shin S	24816252	2014	European	Shin S	C	C/T	0.594	-0.01	0.0017	4.572e-09	7331	2
	rs33951980	rs33951980	chr7:73029437	C/T	rs33951980	chr7:73029437	C/T	1	1	0	Concentration of very large VLDL particles	Kettunen J	27005778	2016	European	Kettunen J	C	C/T	0.8762	0.09531	0.01612	4.61e-09	18440	10
	rs33951980	rs33951980	chr7:73029437	C/T	rs13234131	chr7:73025975	A/G	0.962	1	1	Cholesterol esters in medium VLDL	Kettunen J	27005778	2016	European	Kettunen J	A	A/G	0.8756	0.09356	0.01575	4.65e-09	19267	11
	rs1260326	rs1260326	chr2:27730940	C/T	rs780093	chr2:27742603	C/T	0.908	0.955	1	Glutamine	Kettunen J	27005778	2016	European	Kettunen J	C	C/T	0.6373	0.05616	0.009606	5.17e-09	24461	14
	rs33951980	rs33951980	chr7:73029437	C/T	rs33951980	chr7:73029437	C/T	1	1	0	Cholesterol esters in medium VLDL	Kettunen J	27005778	2016	European	Kettunen J	C	C/T	0.876	0.09334	0.01578	5.43e-09	19268	11
	rs1260326	rs1260326	chr2:27730940	C/T	rs780094	chr2:27741237	C/T	0.912	0.955	1	ApoB	Kettunen J	27005778	2016	European	Kettunen J	C	C/T	0.6331	-0.06118	0.01033	5.48e-09	20690	12
	rs1260326	rs1260326	chr2:27730940	C/T	rs1260326	chr2:27730940	C/T	1	1	0	Gamma-glutamylglutamine	Shin S	24816252	2014	European	Shin S	C	C/T	0.5878	0.0121	0.0021	5.608e-09	7226	2
	rs1260326	rs1260326	chr2:27730940	C/T	rs11127048	chr2:27752463	A/G	0.82	0.913	1	Pyruvate	Kettunen J	27005778	2016	European	Kettunen J	A	A/G	0.5816	-0.05748	0.009869	5.9e-09	24755	14
	rs1260326	rs1260326	chr2:27730940	C/T	rs780094	chr2:27741237	C/T	0.912	0.955	1	OmegaL6 fatty acids	Kettunen J	27005778	2016	European	Kettunen J	C	C/T	0.6301	-0.07358	0.01264	6.32e-09	13506	10
	rs33951980	rs33951980	chr7:73029437	C/T	rs13234378	chr7:73026151	A/T	0.962	1	1	Phospholipids in large VLDL	Kettunen J	27005778	2016	European	Kettunen J	A	A/T	0.8211	0.08422	0.01442	6.8e-09	20527	11
	rs1260326	rs1260326	chr2:27730940	C/T	rs1260326	chr2:27730940	C/T	1	1	0	Total phosphoglycerides	Kettunen J	27005778	2016	European	Kettunen J	C	C/T	0.6367	-0.07379	0.01265	6.83e-09	13519	10
	rs1260326	rs1260326	chr2:27730940	C/T	rs780094	chr2:27741237	C/T	0.912	0.955	1	Total lipids in small LDL	Kettunen J	27005778	2016	European	Kettunen J	C	C/T	0.6305	-0.06227	0.01057	6.98e-09	19273	11
	rs33951980	rs33951980	chr7:73029437	C/T	rs34062580	chr7:73033559	G/A	0.991	1	1	Concentration of very large VLDL particles	Kettunen J	27005778	2016	European	Kettunen J	G	G/A	0.8763	0.09434	0.01615	6.99e-09	18440	10
	rs1260326	rs1260326	chr2:27730940	C/T	rs1260326	chr2:27730940	C/T	1	1	0	Lactate	Kettunen J	27005778	2016	European	Kettunen J	C	C/T	0.6389	-0.05771	0.009968	7.23e-09	22644	13
	rs33951980	rs33951980	chr7:73029437	C/T	rs34060476	chr7:73037956	A/G	0.963	1	1	Concentration of very large VLDL particles	Kettunen J	27005778	2016	European	Kettunen J	A	A/G	0.8762	0.0942	0.01616	7.54e-09	18444	10
	rs33951980	rs33951980	chr7:73029437	C/T	rs71556736	chr7:73034929	C/T	0.991	1	1	Cholesterol esters in medium VLDL	Kettunen J	27005778	2016	European	Kettunen J	C	C/T	0.8749	0.0923	0.01577	7.76e-09	19271	11
	rs1260326	rs1260326	chr2:27730940	C/T	rs4665972	chr2:27598097	C/T	0.869	0.942	1	Serum total cholesterol	Kettunen J	27005778	2016	European	Kettunen J	C	C/T	0.6086	-0.06026	0.01034	8.05e-09	21488	12
	rs33951980	rs33951980	chr7:73029437	C/T	rs13229619	chr7:73030175	G/A	0.972	0.99	1	Cholesterol esters in medium VLDL	Kettunen J	27005778	2016	European	Kettunen J	G	G/A	0.8762	0.09216	0.0158	8.74e-09	19271	11
	rs33951980	rs33951980	chr7:73029437	C/T	rs34062580	chr7:73033559	G/A	0.991	1	1	Cholesterol esters in medium VLDL	Kettunen J	27005778	2016	European	Kettunen J	G	G/A	0.8762	0.0922	0.01581	8.79e-09	19268	11
	rs1260326	rs1260326	chr2:27730940	C/T	rs780093	chr2:27742603	C/T	0.908	0.955	1	ApoB	Kettunen J	27005778	2016	European	Kettunen J	C	C/T	0.6361	-0.06034	0.01033	8.89e-09	20688	12
	rs33951980	rs33951980	chr7:73029437	C/T	rs34060476	chr7:73037956	A/G	0.963	1	1	Cholesterol esters in medium VLDL	Kettunen J	27005778	2016	European	Kettunen J	A	A/G	0.8761	0.09222	0.01582	8.93e-09	19272	11
	rs1260326	rs1260326	chr2:27730940	C/T	rs4665972	chr2:27598097	C/T	0.869	0.942	1	Total lipids in small LDL	Kettunen J	27005778	2016	European	Kettunen J	C	C/T	0.6034	-0.06227	0.01067	9.51e-09	19270	11
	rs1260326	rs1260326	chr2:27730940	C/T	rs780093	chr2:27742603	C/T	0.908	0.955	1	Total lipids in small LDL	Kettunen J	27005778	2016	European	Kettunen J	C	C/T	0.6333	-0.06157	0.01059	1.08e-08	19271	11
	rs1260326	rs1260326	chr2:27730940	C/T	rs780093	chr2:27742603	C/T	0.908	0.955	1	Lactate	Kettunen J	27005778	2016	European	Kettunen J	C	C/T	0.6371	-0.0541	0.009484	1.19e-08	24869	14
	rs1260326	rs1260326	chr2:27730940	C/T	rs11127048	chr2:27752463	A/G	0.82	0.913	1	Cholesterol esters in large VLDL	Kettunen J	27005778	2016	European	Kettunen J	A	A/G	0.572	-0.06268	0.01093	1.48e-08	18958	11
	rs1260326	rs1260326	chr2:27730940	C/T	rs780094	chr2:27741237	C/T	0.912	0.955	1	Other polyunsaturated fatty acids than 18:2	Kettunen J	27005778	2016	European	Kettunen J	C	C/T	0.6301	-0.07181	0.01258	1.49e-08	13549	10
	rs1260326	rs1260326	chr2:27730940	C/T	rs780093	chr2:27742603	C/T	0.908	0.955	1	OmegaL6 fatty acids	Kettunen J	27005778	2016	European	Kettunen J	C	C/T	0.6323	-0.07173	0.01266	1.58e-08	13503	10
	rs1260326	rs1260326	chr2:27730940	C/T	rs11127048	chr2:27752463	A/G	0.82	0.913	1	Total lipids in large VLDL	Kettunen J	27005778	2016	European	Kettunen J	A	A/G	0.572	-0.06185	0.01092	2.03e-08	18958	11
	rs1260326	rs1260326	chr2:27730940	C/T	rs780094	chr2:27741237	C/T	0.912	0.955	1	Total phosphoglycerides	Kettunen J	27005778	2016	European	Kettunen J	C	C/T	0.6301	-0.07093	0.01257	2.05e-08	13519	10
	rs1260326	rs1260326	chr2:27730940	C/T	rs11127048	chr2:27752463	A/G	0.82	0.913	1	Triglycerides in very small VLDL	Kettunen J	27005778	2016	European	Kettunen J	A	A/G	0.5713	-0.06154	0.01087	2.45e-08	19272	11
	rs1260326	rs1260326	chr2:27730940	C/T	rs780093	chr2:27742603	C/T	0.908	0.955	1	LDL diameter	Kettunen J	27005778	2016	European	Kettunen J	C	C/T	0.6333	0.05948	0.0106	2.57e-08	19271	11
	rs1260326	rs1260326	chr2:27730940	C/T	rs4665972	chr2:27598097	C/T	0.869	0.942	1	OmegaL6 fatty acids	Kettunen J	27005778	2016	European	Kettunen J	C	C/T	0.6009	-0.07129	0.01277	2.57e-08	13504	10
	rs1260326	rs1260326	chr2:27730940	C/T	rs11127048	chr2:27752463	A/G	0.82	0.913	1	OmegaL3 fatty acids	Kettunen J	27005778	2016	European	Kettunen J	A	A/G	0.5719	-0.07251	0.01294	2.61e-08	13542	10
	rs1260326	rs1260326	chr2:27730940	C/T	rs1260326	chr2:27730940	C/T	1	1	0	Concentration of medium LDL particles	Kettunen J	27005778	2016	European	Kettunen J	C	C/T	0.6366	-0.06007	0.01063	2.81e-08	19273	11
	rs1260326	rs1260326	chr2:27730940	C/T	rs11127048	chr2:27752463	A/G	0.82	0.913	1	Serum total cholesterol	Kettunen J	27005778	2016	European	Kettunen J	A	A/G	0.5762	-0.05855	0.0105	3.36e-08	21490	12
	rs1260326	rs1260326	chr2:27730940	C/T	rs780094	chr2:27741237	C/T	0.912	0.955	1	Lactate	Kettunen J	27005778	2016	European	Kettunen J	C	C/T	0.6345	-0.05483	0.009924	3.37e-08	22644	13
	rs1260326	rs1260326	chr2:27730940	C/T	rs780094	chr2:27741237	C/T	0.912	0.955	1	Gamma-glutamylglutamine	Shin S	24816252	2014	European	Shin S	C	C/T	0.5992	0.0115	0.0021	3.486e-08	7226	2
	rs33951980	rs33951980	chr7:73029437	C/T	rs13234131	chr7:73025975	A/G	0.962	1	1	Total lipids in chylomicrons and extremely large VLDL	Kettunen J	27005778	2016	European	Kettunen J	A	A/G	0.8756	0.08789	0.0159	3.92e-08	18955	11
	rs1260326	rs1260326	chr2:27730940	C/T	rs1260326	chr2:27730940	C/T	1	1	0	Ratio of bisLallylic bonds to total fatty acids in lipids	Kettunen J	27005778	2016	European	Kettunen J	C	C/T	0.6369	0.07096	0.01283	4.04e-08	13171	10
	rs1260326	rs1260326	chr2:27730940	C/T	rs780093	chr2:27742603	C/T	0.908	0.955	1	Total phosphoglycerides	Kettunen J	27005778	2016	European	Kettunen J	C	C/T	0.6323	-0.0695	0.0126	4.28e-08	13517	10
	rs33951980	rs33951980	chr7:73029437	C/T	rs13234378	chr7:73026151	A/T	0.962	1	1	Total lipids in chylomicrons and extremely large VLDL	Kettunen J	27005778	2016	European	Kettunen J	A	A/T	0.8764	0.08771	0.01592	4.34e-08	18956	11
	rs33951980	rs33951980	chr7:73029437	C/T	rs13246993	chr7:73022746	G/A	0.962	1	1	Total lipids in chylomicrons and extremely large VLDL	Kettunen J	27005778	2016	European	Kettunen J	G	G/A	0.8768	0.08755	0.01591	4.5e-08	18954	11
Potassium	rs10854166	rs10854166	chr19:18652844	G/A	rs10854166	chr19:18652844	G/A	1	1	0	Myo-inositol	Shin S	24816252	2014	European	Shin S	G	G/A	0.4799	-0.0116	0.0017	1.441e-11	7354	2
	SNP: rs number; Pos (hg19): position; EAF: Effect allele frequency
