# Supplementary material for: GWAS for urinary sodium and potassium excretion highlights pathways shared with cardiovascular traits
Source: Nat Commun. 2019 Aug 13;10:3653. doi: 10.1038/s41467-019-11451-y (PMC6692500; doi:10.1038/s41467-019-11451-y)
Supplement: Supplementary file 18 — Supplementary Dataset 18 [file 41467_2019_11451_MOESM18_ESM.xlsx]

## Sheet: Supplementary Data 18
Supplementary Data 18: Association of urinary sodium and potassium loci with metabolites in Airwave using metabolon.
SNP	SNP_ID	SNP_outcome	rho	pval	pvalFDR	PATHWAY_SORTORDER	BIOCHEMICAL	SUPER_PATHWAY	SUB_PATHWAY	COMP_ID	PLATFORM	CHEMICAL_ID	RI	MASS	CAS	PUBCHEM	CHEMSPIDER	KEGG	HMDB ID
rs7924036	Chr10_65191645_G_T	Urinary sodium	-0.0869391	0.000118661	0.0169537	1574	1,2-dipalmitoyl-GPE (16:0/16:0)*	Lipid	Phospholipid Metabolism	57341	LC/MS Pos Late	100009204	2498	692.522		11802774;445468	393103
rs7924036	Chr10_65191645_G_T	Urinary sodium	-0.0779862	0.00055801	0.037518	1814	1-palmitoleoyl-GPE (16:1)*	Lipid	Lysolipid	34565	LC/MS Pos Late	100001784	1450	452.277
rs7924036	Chr10_65191645_G_T	Urinary sodium	-0.0756368	0.000817015	0.0446382	1627	1-palmitoyl-2-arachidonoyl-GPE (16:0/20:4)*	Lipid	Phospholipid Metabolism	52464	LC/MS Pos Late	100008990	2198	740.522		9546800	7825750		HMDB05323
rs7924036	Chr10_65191645_G_T	Urinary sodium	-0.0753726	0.000852259	0.0446382	1580	1-palmitoyl-2-linoleoyl-GPC (16:0/18:2)	Lipid	Phospholipid Metabolism	42446	LC/MS Pos Late	1537	2160	758.569	40811-94-7	5287971	4450224
rs7924036	Chr10_65191645_G_T	Urinary sodium	-0.0840996	0.000197094	0.0204799	1629	1-palmitoyl-2-linoleoyl-GPE (16:0/18:2)	Lipid	Phospholipid Metabolism	42449	LC/MS Pos Late	100001870	2275	716.522		9546747	7825697		HMDB05322
rs7924036	Chr10_65191645_G_T	Urinary sodium	-0.0914469	5.13794e-05	0.0117453	1617	1-palmitoyl-2-oleoyl-GPE (16:0/18:1)	Lipid	Phospholipid Metabolism	19263	LC/MS Pos Late	1526	2509	718.538	26662-94-2	5283496	4446615		HMDB05320
rs7924036	Chr10_65191645_G_T	Urinary sodium	-0.0904081	6.25255e-05	0.0119111	1618	1-palmitoyl-2-palmitoleoyl-GPE (16:0/16:1)*	Lipid	Phospholipid Metabolism	52471	LC/MS Pos Late	100008996	2256	690.507			24768424
rs7924036	Chr10_65191645_G_T	Urinary sodium	-0.0782015	0.000538574	0.037518	1632	1-stearoyl-2-linoleoyl-GPE (18:0/18:2)*	Lipid	Phospholipid Metabolism	52446	LC/MS Pos Late	100008976	2522	744.554		9546749	7825699
rs7924036	Chr10_65191645_G_T	Urinary sodium	-0.0748931	0.000919835	0.0457118	1625	1-stearoyl-2-oleoyl-GPE (18:0/18:1)	Lipid	Phospholipid Metabolism	42448	LC/MS Pos Late	100001856	2858	746.569
rs7924036	Chr10_65191645_G_T	Urinary sodium	0.0769459	0.000661481	0.042004	189	3-phenylpropionate (hydrocinnamate)	Amino Acid	Phenylalanine and Tyrosine Metabolism	15749	LC/MS Neg	100000010	2860	149.061	501-52-0	107	10181339	C05629	HMDB00764
rs7924036	Chr10_65191645_G_T	Urinary sodium	0.0816684	0.000300663	0.0264352	57	beta-citrylglutamate	Amino Acid	Glutamate Metabolism	54923	LC/MS Neg	100003271	530	320.062	73590-26-8		19992713
rs7924036	Chr10_65191645_G_T	Urinary sodium	-0.083205	0.000230527	0.0219577	1954	diacylglycerol (14:0/18:1, 16:0/16:1) [2]*	Lipid	Diacylglycerol	54954	LC/MS Pos Late	100010935	3183	584.525
rs7924036	Chr10_65191645_G_T	Urinary sodium	-0.0979679	1.42899e-05	0.00816668	1955	diacylglycerol (16:1/18:2 [2], 16:0/18:3 [1])*	Lipid	Diacylglycerol	54966	LC/MS Pos Late	100010940	2733	608.525
rs7924036	Chr10_65191645_G_T	Urinary sodium	0.0753219	0.000859177	0.0446382	3439	glycyrrhetinate	Xenobiotics	Food Component/Plant	39789	LC/MS Pos Late	100002856	1494	471.347	471-53-4	18526330	17930566	C02283	HMDB11628
rs7924036	Chr10_65191645_G_T	Urinary sodium	-0.0765364	0.000706893	0.0425252	1993	oleoyl-oleoyl-glycerol (18:1/18:1) [1]*	Lipid	Diacylglycerol	54945	LC/MS Pos Late	100010918	3571	638.572
rs7924036	Chr10_65191645_G_T	Urinary sodium	-0.0781913	0.000539487	0.037518	1994	oleoyl-oleoyl-glycerol (18:1/18:1) [2]*	Lipid	Diacylglycerol	54946	LC/MS Pos Late	100010919	3695	638.572
rs7924036	Chr10_65191645_G_T	Urinary sodium	-0.0857456	0.000147144	0.0185948	1974	palmitoleoyl-linoleoyl-glycerol (16:1/18:2) [1]*	Lipid	Diacylglycerol	54967	LC/MS Pos Late	100010930	2664	608.525
rs7924036	Chr10_65191645_G_T	Urinary sodium	-0.0851834	0.000162684	0.0185948	1987	palmitoyl-linoleoyl-glycerol (16:0/18:2) [1]*	Lipid	Diacylglycerol	52633	LC/MS Pos Late	100009052	3080	610.541		9543695	7822645		HMDB05207
rs7924036	Chr10_65191645_G_T	Urinary sodium	-0.0881916	9.44044e-05	0.0154149	1988	palmitoyl-linoleoyl-glycerol (16:0/18:2) [2]*	Lipid	Diacylglycerol	52634	LC/MS Pos Late	100009055	3197	610.541
rs7924036	Chr10_65191645_G_T	Urinary sodium	-0.0921349	4.50639e-05	0.0117453	1980	palmitoyl-oleoyl-glycerol (16:0/18:1) [1]*	Lipid	Diacylglycerol	54943	LC/MS Pos Late	100010916	3562	612.556
rs7924036	Chr10_65191645_G_T	Urinary sodium	-0.0948442	2.66488e-05	0.0101532	1981	palmitoyl-oleoyl-glycerol (16:0/18:1) [2]*	Lipid	Diacylglycerol	54942	LC/MS Pos Late	100010917	3695	612.556
rs7924036	Chr10_65191645_G_T	Urinary sodium	-0.100101	9.23623e-06	0.00816668	3125	retinol (Vitamin A)	Cofactors and Vitamins	Vitamin A Metabolism	1806	LC/MS Pos Late	498	1636	269.226	68-26-8	445354	393012	C00473	HMDB00305
rs7924036	Chr10_65191645_G_T	Urinary sodium	-0.0784897	0.000513544	0.037518	1997	sphinganine	Lipid	Sphingolipid Metabolism	17769	LC/MS Pos Late	313	1413	302.305	3102-56-5	3126	3014	C00836	HMDB00269
rs1957111	Chr14_29781178_C_T	Urinary sodium	0.0928781	3.9071e-05	0.0446582	3583	daidzein sulfate (2)	Xenobiotics	Food Component/Plant	48728	LC/MS Neg	100006363	3330	333.008
rs4788415	Chr16_30439309_T_C	Urinary sodium	-0.100502	8.50033e-06	0.00971587		X - 12206			46612	LC/MS Neg		622	254.982
rs117287096	Chr19_41341413_G_A	Urinary sodium	-0.109732	1.15368e-06	0.00065933		X - 12126			46966	LC/MS Neg		1205	324.074
rs117287096	Chr19_41341413_G_A	Urinary sodium	-0.113156	5.27133e-07	0.000602513		X - 12216			46613	LC/MS Neg		1691	227.997
rs643428	Chr1_54728858_C_T	Urinary sodium	-0.0966525	1.86207e-05	0.0212835	114	phenylpyruvate	Amino Acid	Phenylalanine and Tyrosine Metabolism	566	LC/MS Neg	241	2517.6	163.04	156-06-9	997	972	C00166	HMDB00205
rs1260326	Chr2_27730940_T_C	Urinary sodium	-0.0818901	0.000289436	0.0195185	1827	1-docosahexaenoyl-GPE (22:6)*	Lipid	Lysolipid	44633	LC/MS Pos Late	100002060	1450	526.293
rs1260326	Chr2_27730940_T_C	Urinary sodium	-0.0694387	0.00212628	0.0390566	1635	1-margaroyl-2-oleoyl-GPC (17:0/18:1)*	Lipid	Phospholipid Metabolism	52499	LC/MS Pos Late	100009036	2450	774.601			24822423
rs1260326	Chr2_27730940_T_C	Urinary sodium	-0.0772276	0.000631833	0.0195185	1708	1-myristoyl-2-arachidonoyl-GPC (14:0/20:4)*	Lipid	Phospholipid Metabolism	53195	LC/MS Pos Late	100009139	1914	754.538			24766559
rs1260326	Chr2_27730940_T_C	Urinary sodium	-0.0796279	0.000424889	0.0195185	1709	1-myristoyl-2-docosahexaenoyl-GPC (14:0/22:6)*	Lipid	Phospholipid Metabolism	53196	LC/MS Pos Late	100009140	1859	778.538			24766568
rs1260326	Chr2_27730940_T_C	Urinary sodium	-0.0878479	0.000100547	0.0180336	1657	1-myristoyl-2-linoleoyl-GPC (14:0/18:2)*	Lipid	Phospholipid Metabolism	52707	LC/MS Pos Late	100009138	1976	730.538			24766550
rs1260326	Chr2_27730940_T_C	Urinary sodium	-0.0830708	0.000235978	0.0195185	1763	1-myristoyl-GPC (14:0)	Lipid	Lysolipid	45453	LC/MS Pos Late	100001383	1428	468.308	20559-16-4	460604	405289	C04230	HMDB10379
rs1260326	Chr2_27730940_T_C	Urinary sodium	-0.0789918	0.0004725	0.0195185	1771	1-palmitoleoyl-GPC (16:1)*	Lipid	Lysolipid	33230	LC/MS Pos Late	100001511	1450	494.324		24779461	21403152		HMDB10383
rs1260326	Chr2_27730940_T_C	Urinary sodium	-0.0790859	0.000465155	0.0195185	1814	1-palmitoleoyl-GPE (16:1)*	Lipid	Lysolipid	34565	LC/MS Pos Late	100001784	1450	452.277
rs1260326	Chr2_27730940_T_C	Urinary sodium	-0.080854	0.000345485	0.0195185	1579	1-palmitoyl-2-oleoyl-GPC (16:0/18:1)	Lipid	Phospholipid Metabolism	52461	LC/MS Pos Late	1539	2358	760.585	26853-31-6;26853-31-6	6436017	4940699
rs1260326	Chr2_27730940_T_C	Urinary sodium	-0.068605	0.0024051	0.040414	1617	1-palmitoyl-2-oleoyl-GPE (16:0/18:1)	Lipid	Phospholipid Metabolism	19263	LC/MS Pos Late	1526	2509	718.538	26662-94-2	5283496	4446615		HMDB05320
rs1260326	Chr2_27730940_T_C	Urinary sodium	-0.0859833	0.000141003	0.0180336	1597	1-palmitoyl-2-palmitoleoyl-GPC (16:0/16:1)*	Lipid	Phospholipid Metabolism	52470	LC/MS Pos Late	100008984	2160	732.554
rs1260326	Chr2_27730940_T_C	Urinary sodium	-0.0757245	0.000805619	0.0209278	1618	1-palmitoyl-2-palmitoleoyl-GPE (16:0/16:1)*	Lipid	Phospholipid Metabolism	52471	LC/MS Pos Late	100008996	2256	690.507			24768424
rs1260326	Chr2_27730940_T_C	Urinary sodium	-0.0663044	0.00335677	0.0485669	1583	1-stearoyl-2-dihomo-linolenoyl-GPE (18:0/20:3n3 or 6)*	Lipid	Phospholipid Metabolism	57336	LC/MS Pos Late	100009215	2567	770.569			24768480
rs1260326	Chr2_27730940_T_C	Urinary sodium	-0.0750368	0.000899077	0.0213584	1622	1-stearoyl-2-docosahexaenoyl-GPE (18:0/22:6)*	Lipid	Phospholipid Metabolism	52466	LC/MS Pos Late	100008992	2317	792.554		9546798	7825748		HMDB05334
rs1260326	Chr2_27730940_T_C	Urinary sodium	-0.074922	0.000915629	0.0213584	1110	10-heptadecenoate (17:1n7)	Lipid	Long Chain Fatty Acid	33971	LC/MS Neg	100001278	5555	267.233	29743-97-3	5312435	4471860		HMDB60038
rs1260326	Chr2_27730940_T_C	Urinary sodium	-0.076609	0.00069864	0.0199637	1120	10-nonadecenoate (19:1n9)	Lipid	Long Chain Fatty Acid	33972	LC/MS Neg	100001277	5780	295.264	73033-09-7	5312513	4471938		HMDB13622
rs1260326	Chr2_27730940_T_C	Urinary sodium	-0.0660966	0.00345769	0.0489618	1399	16-hydroxypalmitate	Lipid	Fatty Acid, Monohydroxy	39609	LC/MS Neg	100002953	5236.2	271.228	506-13-8	10466	10034	C18218	HMDB06294
rs1260326	Chr2_27730940_T_C	Urinary sodium	-0.0966411	1.86632e-05	0.0042664	365	2-hydroxybutyrate/2-hydroxyisobutyrate	Amino Acid	Methionine, Cysteine, SAM and Taurine Metabolism	52281	LC/MS Polar	100008928	1258	103.04
rs1260326	Chr2_27730940_T_C	Urinary sodium	-0.0666838	0.00317931	0.0481555	300	3-methyl-2-oxobutyrate	Amino Acid	Leucine, Isoleucine and Valine Metabolism	44526	LC/MS Neg	100000936	1465	115.04	3715-29-5	49	48	C00141	HMDB00019
rs1260326	Chr2_27730940_T_C	Urinary sodium	-0.0786354	0.000501304	0.0195185	95	3-methylglutarylcarnitine (2)	Amino Acid	Lysine Metabolism	46548	LC/MS Pos Early	100005850	2675	290.16		128145	113619		HMDB00552
rs1260326	Chr2_27730940_T_C	Urinary sodium	-0.066468	0.00327917	0.0481555	1101	5-dodecenoate (12:1n7)	Lipid	Medium Chain Fatty Acid	33968	LC/MS Neg	100001232	5224	197.155	2430-94-6	5312378	4471803		HMDB00529
rs1260326	Chr2_27730940_T_C	Urinary sodium	0.0695511	0.00209104	0.0390566	3215	7-methylxanthine	Xenobiotics	Xanthine Metabolism	34390	LC/MS Pos Early	100001396	1350	167.056	552-62-5	68374	61660	C16353	HMDB01991
rs1260326	Chr2_27730940_T_C	Urinary sodium	-0.0814911	0.000309929	0.0195185	1328	acetylcarnitine (C2)	Lipid	Fatty Acid Metabolism(Acyl Carnitine)	32198	LC/MS Pos Early	100000802	2282	204.123	5080-50-2	1	5406074	C02571	HMDB00201
rs1260326	Chr2_27730940_T_C	Urinary sodium	-0.0773999	0.000614312	0.0195185	259	C-glycosyltryptophan	Amino Acid	Tryptophan Metabolism	48782	LC/MS Pos Early	100006379	2685	367.15	180509-18-6	10981970	9157171
rs1260326	Chr2_27730940_T_C	Urinary sodium	-0.070252	0.00188313	0.0377617	1337	cis-4-decenoylcarnitine (C10:1)	Lipid	Fatty Acid Metabolism(Acyl Carnitine)	38178	LC/MS Pos Late	100002259	1057	314.233	98930-66-6
rs1260326	Chr2_27730940_T_C	Urinary sodium	-0.079576	0.000428601	0.0195185	1335	decanoylcarnitine (C10)	Lipid	Fatty Acid Metabolism(Acyl Carnitine)	33941	LC/MS Pos Late	100001251	1130	316.248	1492-27-9	10245190	8420677		HMDB00651
rs1260326	Chr2_27730940_T_C	Urinary sodium	-0.068253	0.00253257	0.0407707	1955	diacylglycerol (16:1/18:2 [2], 16:0/18:3 [1])*	Lipid	Diacylglycerol	54966	LC/MS Pos Late	100010940	2733	608.525
rs1260326	Chr2_27730940_T_C	Urinary sodium	-0.081211	0.00032512	0.0195185	1156	dihomo-linoleate (20:2n6)	Lipid	Polyunsaturated Fatty Acid (n3 and n6)	17805	LC/MS Neg	1231	5730	307.264	2091-39-6	6439848	4944228	C16525	HMDB05060
rs1260326	Chr2_27730940_T_C	Urinary sodium	-0.0753158	0.000860017	0.0213584	1151	dihomo-linolenate (20:3n3 or n6)	Lipid	Polyunsaturated Fatty Acid (n3 and n6)	35718	LC/MS Neg	100001739	5596	305.249	17046-59-2	5280581	4471954	C03242	HMDB02925
rs1260326	Chr2_27730940_T_C	Urinary sodium	-0.0743461	0.00100296	0.0228682	1142	docosapentaenoate (n3 DPA; 22:5n3)	Lipid	Polyunsaturated Fatty Acid (n3 and n6)	32504	LC/MS Neg	100001181	5571	329.249	2234-74-4	6441454		C16513	HMDB01976
rs1260326	Chr2_27730940_T_C	Urinary sodium	0.0807972	0.000348835	0.0195185	442	gamma-glutamylglutamine	Peptide	Gamma-glutamyl Amino Acid	2730	LC/MS Pos Early	1140	1430	276.119	10148-81-9	150914	133013	C05283	HMDB11738
rs1260326	Chr2_27730940_T_C	Urinary sodium	-0.0773814	0.00061617	0.0195185	452	gamma-glutamyltryptophan	Peptide	Gamma-glutamyl Amino Acid	33947	LC/MS Pos Early	100001295	2975	334.14	66471-20-3	3989307	2302065		HMDB29160
rs1260326	Chr2_27730940_T_C	Urinary sodium	-0.0690418	0.00225509	0.0390566	1908	glycerol	Lipid	Glycerolipid Metabolism	15122	LC/MS Neg	1254	758	91.0401	56-81-5	753	733	C00116	HMDB00131
rs1260326	Chr2_27730940_T_C	Urinary sodium	-0.0805216	0.000365521	0.0195185	1332	hexanoylcarnitine (C6)	Lipid	Fatty Acid Metabolism(Acyl Carnitine)	32328	LC/MS Pos Early	100000781	3308	260.186	6920-35-0	6426853	4932273		HMDB00705
rs1260326	Chr2_27730940_T_C	Urinary sodium	0.0721394	0.00141394	0.0293752	61	histidine	Amino Acid	Histidine Metabolism	59	LC/MS Neg	355	755.9	154.062	5934-29-2	6274	752	C00135	HMDB00177
rs1260326	Chr2_27730940_T_C	Urinary sodium	0.066453	0.0032862	0.0481555	275	isovalerylglycine	Amino Acid	Leucine, Isoleucine and Valine Metabolism	35107	LC/MS Neg	100001452	1950	158.082	16284-60-9	546304	475516		HMDB00678
rs1260326	Chr2_27730940_T_C	Urinary sodium	-0.0660722	0.00346974	0.0489618	1100	laurate (12:0)	Lipid	Medium Chain Fatty Acid	1645	LC/MS Neg	181	5300	199.17	143-07-7	3893	3756	C02679	HMDB00638
rs1260326	Chr2_27730940_T_C	Urinary sodium	-0.0777967	0.000575664	0.0195185	1338	laurylcarnitine (C12)	Lipid	Fatty Acid Metabolism(Acyl Carnitine)	34534	LC/MS Pos Late	100001392	1235	344.28	25518-54-1	10427569	8602997		HMDB02250
rs1260326	Chr2_27730940_T_C	Urinary sodium	-0.0762802	0.00073676	0.0202631	1147	linoleate (18:2n6)	Lipid	Polyunsaturated Fatty Acid (n3 and n6)	1105	LC/MS Neg	180	5535	279.233	60-33-3	5280450	4444105	C01595	HMDB00673
rs1260326	Chr2_27730940_T_C	Urinary sodium	-0.075022	0.000901196	0.0213584	1149	linolenate [alpha or gamma; (18:3n3 or 6)]	Lipid	Polyunsaturated Fatty Acid (n3 and n6)	34035	LC/MS Neg	100001337	5450	277.217		5280934	4444437	C06426	HMDB03073
rs1260326	Chr2_27730940_T_C	Urinary sodium	0.141829	2.99821e-10	3.42696e-07	991	mannose	Carbohydrate	Fructose, Mannose and Galactose Metabolism	48153	LC/MS Polar	803	2200	225.062	3458-28-4	18950	141983	C00159	HMDB00169
rs1260326	Chr2_27730940_T_C	Urinary sodium	-0.0859441	0.000141997	0.0180336	1109	margarate (17:0)	Lipid	Long Chain Fatty Acid	1121	LC/MS Neg	891	5731	269.249	506-12-7	10465	10033		HMDB02259
rs1260326	Chr2_27730940_T_C	Urinary sodium	0.0691024	0.00223497	0.0390566	289	methylsuccinate	Amino Acid	Leucine, Isoleucine and Valine Metabolism	15745	LC/MS Polar	2051	2800	131.035	498-21-5	10349	9922		HMDB01844
rs1260326	Chr2_27730940_T_C	Urinary sodium	-0.0788519	0.000483612	0.0195185	1103	myristate (14:0)	Lipid	Long Chain Fatty Acid	1365	LC/MS Neg	519	5440	227.202	544-63-8	11005	10539	C06424	HMDB00806
rs1260326	Chr2_27730940_T_C	Urinary sodium	-0.0739485	0.00106771	0.0234691	1347	myristoleoylcarnitine (C14:1)*	Lipid	Fatty Acid Metabolism(Acyl Carnitine)	48182	LC/MS Pos Late	100006051	1316	370.295	889848-55-9
rs1260326	Chr2_27730940_T_C	Urinary sodium	-0.0768546	0.000671371	0.0196763	1339	myristoylcarnitine (C14)	Lipid	Fatty Acid Metabolism(Acyl Carnitine)	33952	LC/MS Pos Late	100001270	1350	372.311	18822-89-4	53477791	4932274		HMDB05066
rs1260326	Chr2_27730940_T_C	Urinary sodium	-0.0680759	0.00259899	0.0412589	1058	N-acetylglucosaminylasparagine	Carbohydrate	Aminosugar Metabolism	48149	LC/MS Pos Early	1215	1212	336.14	2776-93-4	123826	21403014	C04540	HMDB00489
rs1260326	Chr2_27730940_T_C	Urinary sodium	-0.076103	0.000758098	0.0202631	2041	N-stearoyl-sphingosine (d18:1/18:0)*	Lipid	Sphingolipid Metabolism	54979	LC/MS Pos Late	1547	3392	566.551	104404-17-3	5283565	4446678		HMDB04950
rs1260326	Chr2_27730940_T_C	Urinary sodium	-0.0684585	0.00245742	0.040414	2915	N1-methyladenosine	Nucleotide	Purine Metabolism, Adenine containing	15650	LC/MS Pos Early	1242	2120	282.12	15763-06-1	27476	4573813	C02494	HMDB03331
rs1260326	Chr2_27730940_T_C	Urinary sodium	-0.086355	0.000131881	0.0180336	1333	octanoylcarnitine (C8)	Lipid	Fatty Acid Metabolism(Acyl Carnitine)	33936	LC/MS Pos Late	100001247	950	288.217	3671-77-0	123701	110274	C02838	HMDB00791
rs1260326	Chr2_27730940_T_C	Urinary sodium	-0.0760687	0.000762304	0.0202631	1137	oleate/vaccenate (18:1)	Lipid	Long Chain Fatty Acid	52285	LC/MS Neg	100008930	5655	281.249
rs1260326	Chr2_27730940_T_C	Urinary sodium	-0.0684098	0.00247505	0.040414	1958	oleoyl-linoleoyl-glycerol (18:1/18:2) [2]	Lipid	Diacylglycerol	46799	LC/MS Pos Late	100002990	3223	636.556	104346-53-4
rs1260326	Chr2_27730940_T_C	Urinary sodium	-0.0785725	0.00050655	0.0195185	1993	oleoyl-oleoyl-glycerol (18:1/18:1) [1]*	Lipid	Diacylglycerol	54945	LC/MS Pos Late	100010918	3571	638.572
rs1260326	Chr2_27730940_T_C	Urinary sodium	-0.0807809	0.000349801	0.0195185	1994	oleoyl-oleoyl-glycerol (18:1/18:1) [2]*	Lipid	Diacylglycerol	54946	LC/MS Pos Late	100010919	3695	638.572
rs1260326	Chr2_27730940_T_C	Urinary sodium	-0.0832792	0.000227565	0.0195185	1106	palmitate (16:0)	Lipid	Long Chain Fatty Acid	1336	LC/MS Neg	424	5618	255.233	57-10-3	985	960	C00249	HMDB00220
rs1260326	Chr2_27730940_T_C	Urinary sodium	-0.0729981	0.00123841	0.0267075	1107	palmitoleate (16:1n7)	Lipid	Long Chain Fatty Acid	33447	LC/MS Neg	452	5475	253.217	373-49-9	445638	393216	C08362	HMDB03229
rs1260326	Chr2_27730940_T_C	Urinary sodium	-0.0825331	0.00025906	0.0195185	1974	palmitoleoyl-linoleoyl-glycerol (16:1/18:2) [1]*	Lipid	Diacylglycerol	54967	LC/MS Pos Late	100010930	2664	608.525
rs1260326	Chr2_27730940_T_C	Urinary sodium	-0.0697946	0.00201652	0.0389891	1987	palmitoyl-linoleoyl-glycerol (16:0/18:2) [1]*	Lipid	Diacylglycerol	52633	LC/MS Pos Late	100009052	3080	610.541		9543695	7822645		HMDB05207
rs1260326	Chr2_27730940_T_C	Urinary sodium	-0.0780708	0.0005503	0.0195185	1988	palmitoyl-linoleoyl-glycerol (16:0/18:2) [2]*	Lipid	Diacylglycerol	52634	LC/MS Pos Late	100009055	3197	610.541
rs1260326	Chr2_27730940_T_C	Urinary sodium	-0.0837502	0.00020957	0.0195185	1981	palmitoyl-oleoyl-glycerol (16:0/18:1) [2]*	Lipid	Diacylglycerol	54942	LC/MS Pos Late	100010917	3695	612.556
rs1260326	Chr2_27730940_T_C	Urinary sodium	-0.069202	0.00220227	0.0390566	1105	pentadecanoate (15:0)	Lipid	Long Chain Fatty Acid	1361	LC/MS Neg	980	5521	241.217	1002-84-2;10002-84-2	13849	13249	C16537	HMDB00826
rs1260326	Chr2_27730940_T_C	Urinary sodium	-0.0998948	9.6383e-06	0.00275414	707	phenylalanyltryptophan	Peptide	Dipeptide	41377	LC/MS Pos Early	100003594	3325	352.166	24587-41-5		10443429
rs1260326	Chr2_27730940_T_C	Urinary sodium	-0.0775814	0.000596344	0.0195185	1725	phosphatidylcholine (15:0/18:1, 17:0/16:1)*	Lipid	Phospholipid Metabolism	53178	LC/MS Pos Late	100009347	2224	746.569
rs1260326	Chr2_27730940_T_C	Urinary sodium	0.0665132	0.00325801	0.0481555	2161	pregnanediol-3-glucuronide	Lipid	Steroid	40708	LC/MS Neg	100003470	5145	495.296	1852-49-9	123796	110346
rs1260326	Chr2_27730940_T_C	Urinary sodium	0.0696951	0.00204667	0.0389891	9	serine	Amino Acid	Glycine, Serine and Threonine Metabolism	1648	LC/MS Pos Early	503	1239	106.05	56-45-1	5951	5736	C00065	HMDB00187
rs1260326	Chr2_27730940_T_C	Urinary sodium	-0.0775971	0.000594809	0.0195185	1111	stearate (18:0)	Lipid	Long Chain Fatty Acid	1358	LC/MS Neg	439	5872	283.264	57-11-4	5281	5091	C01530	HMDB00827
rs1260326	Chr2_27730940_T_C	Urinary sodium	-0.0806774	0.000356	0.0195185	1140	stearidonate (18:4n3)	Lipid	Polyunsaturated Fatty Acid (n3 and n6)	33969	LC/MS Neg	100001229	5395	275.202	111174-40-4	5312508	4471933	C16300	HMDB06547
rs1260326	Chr2_27730940_T_C	Urinary sodium	0.07535	0.000855336	0.0213584	2265	tauro-beta-muricholate	Lipid	Primary Bile Acid Metabolism	33983	LC/MS Neg	100001250	4774	514.284	25696-60-0	168408	147312		HMDB00932
rs1260326	Chr2_27730940_T_C	Urinary sodium	0.102448	5.65635e-06	0.00215507	15	threonine	Amino Acid	Glycine, Serine and Threonine Metabolism	1284	LC/MS Pos Early	564	1514	120.066	72-19-5	6288	6051	C00188	HMDB00167
rs1260326	Chr2_27730940_T_C	Urinary sodium	-0.07693	0.00066319	0.0196763		X - 11381			46347	LC/MS Neg		1118	184.098
rs1260326	Chr2_27730940_T_C	Urinary sodium	-0.074237	0.00102036	0.0228682		X - 11540			32857	LC/MS Pos Late		1200	342.263
rs1260326	Chr2_27730940_T_C	Urinary sodium	-0.111944	6.97424e-07	0.000398578		X - 11593			47653	LC/MS Neg		764	189.041
rs1260326	Chr2_27730940_T_C	Urinary sodium	-0.0728762	0.00126203	0.0267129		X - 12063			46588	LC/MS Neg		4800	427.214
rs1260326	Chr2_27730940_T_C	Urinary sodium	-0.078141	0.000543971	0.0195185		X - 12100			47687	LC/MS Pos Early		2650	221.092
rs1260326	Chr2_27730940_T_C	Urinary sodium	-0.072024	0.0014392	0.0293752		X - 12117			47695	LC/MS Pos Early		2366	204.134
rs1260326	Chr2_27730940_T_C	Urinary sodium	-0.0690414	0.00225524	0.0390566		X - 12442			46618	LC/MS Neg		5315	223.171
rs1260326	Chr2_27730940_T_C	Urinary sodium	0.0687545	0.00235277	0.0401376		X - 12730			47937	LC/MS Neg		2048	203.997
rs1260326	Chr2_27730940_T_C	Urinary sodium	-0.0796736	0.000421644	0.0195185		X - 12798			46624	LC/MS Pos Early		2011	240.102
rs1260326	Chr2_27730940_T_C	Urinary sodium	-0.0675969	0.00278674	0.0431845		X - 18914			46368	LC/MS Neg		4503	266.889
rs1260326	Chr2_27730940_T_C	Urinary sodium	-0.0675744	0.00279585	0.0431845		X - 21658			46727	LC/MS Neg		5181	498.93
rs1260326	Chr2_27730940_T_C	Urinary sodium	-0.0699497	0.00197035	0.0388295		X - 22764			48067	LC/MS Neg		5263	197.155
rs6754321	Chr2_105387607_A_C	Urinary sodium	-0.0932091	3.66524e-05	0.0418937	311	ethylmalonate	Amino Acid	Leucine, Isoleucine and Valine Metabolism	15765	LC/MS Polar	2054	2785	131.035	601-75-2	11756	11263		HMDB00622
rs1229984	Chr4_100239319_T_C	Urinary sodium	0.0908087	5.79807e-05	0.0439641	1573	1,2-dipalmitoyl-GPC (16:0/16:0)	Lipid	Phospholipid Metabolism	19130	LC/MS Pos Late	100000657	2365	734.569	63-89-8	452110	398235		HMDB00564
rs1229984	Chr4_100239319_T_C	Urinary sodium	0.0887428	8.52851e-05	0.0439641	2017	lignoceroyl sphingomyelin (d18:1/24:0)	Lipid	Sphingolipid Metabolism	57330	LC/MS Pos Late	100006298	3437	815.7	60037-60-7		24846875
rs1229984	Chr4_100239319_T_C	Urinary sodium	-0.087093	0.000115391	0.0439641	1965	linoleoyl-linoleoyl-glycerol (18:2/18:2) [1]*	Lipid	Diacylglycerol	54968	LC/MS Pos Late	100010941	2689	634.541
rs7442885	Chr5_87682877_C_G	Urinary sodium	-0.0927752	3.9853e-05	0.045552	1817	2-linoleoyl-GPE (18:2)*	Lipid	Lysolipid	36593	LC/MS Neg	100001776	5813	476.278
rs4410790	Chr7_17284577_T_C	Urinary sodium_K	0.102557	5.52816e-06	0.00631869	3216	5-acetylamino-6-amino-3-methyluracil	Xenobiotics	Xanthine Metabolism	34424	LC/MS Polar	100001403	1710	197.068	1196153-01-1	88299	79659	C16366	HMDB04400
