# Supplementary material for: GWAS for urinary sodium and potassium excretion highlights pathways shared with cardiovascular traits
Source: Nat Commun. 2019 Aug 13;10:3653. doi: 10.1038/s41467-019-11451-y (PMC6692500; doi:10.1038/s41467-019-11451-y)
Supplement: Supplementary file 19 — Supplementary Dataset 19 [file 41467_2019_11451_MOESM19_ESM.xlsx]

## Sheet: Supplementary Data 19
Supplementary Data 19: Summary of eQTL effects of urinary sodium SNPs (P<1×10-8) from eQTL look up using GTeX.
SNP	SNP_Chr	SNP_Pos	Gen_ID	Gene_Name	Gene_Pos	T_Stat	Beta	P_Val	EmpP	nom_thresh
Esophagus_Mucosa.portal.eqtl:rs492602	19	49206417	ENSG00000176920.10	FUT2	49199228	-13.8679	-0.821537	3.80429e-22	9.999e-05	3.37295e-06
Esophagus_Mucosa.portal.eqtl:rs516246	19	49206172	ENSG00000176920.10	FUT2	49199228	-13.8679	-0.821537	3.80429e-22	9.999e-05	3.37295e-06
Esophagus_Mucosa.portal.eqtl:rs516316	19	49206145	ENSG00000176920.10	FUT2	49199228	-13.8679	-0.821537	3.80429e-22	9.999e-05	3.37295e-06
Esophagus_Mucosa.portal.eqtl:rs601338	19	49206674	ENSG00000176920.10	FUT2	49199228	-13.8679	-0.821537	3.80429e-22	9.999e-05	3.37295e-06
Esophagus_Mucosa.portal.eqtl:rs679574	19	49206108	ENSG00000176920.10	FUT2	49199228	-13.8679	-0.821537	3.80429e-22	9.999e-05	3.37295e-06
Esophagus_Mucosa.portal.eqtl:rs681343	19	49206462	ENSG00000176920.10	FUT2	49199228	-13.8679	-0.821537	3.80429e-22	9.999e-05	3.37295e-06
Esophagus_Mucosa.portal.eqtl:rs2251034	19	49207792	ENSG00000176920.10	FUT2	49199228	-13.2124	-0.794012	4.82723e-21	9.999e-05	3.37295e-06
Esophagus_Mucosa.portal.eqtl:rs633372	19	49209226	ENSG00000176920.10	FUT2	49199228	-13.2124	-0.794012	4.82723e-21	9.999e-05	3.37295e-06
Esophagus_Mucosa.portal.eqtl:rs485073	19	49207255	ENSG00000176920.10	FUT2	49199228	-13.0694	-0.816224	8.46472e-21	9.999e-05	3.37295e-06
Esophagus_Mucosa.portal.eqtl:rs485186	19	49207206	ENSG00000176920.10	FUT2	49199228	-13.0694	-0.816224	8.46472e-21	9.999e-05	3.37295e-06
Esophagus_Mucosa.portal.eqtl:rs603985	19	49207257	ENSG00000176920.10	FUT2	49199228	-13.0694	-0.816224	8.46472e-21	9.999e-05	3.37295e-06
Esophagus_Mucosa.portal.eqtl:rs571689	19	49207554	ENSG00000176920.10	FUT2	49199228	-12.8602	-0.813041	1.93306e-20	9.999e-05	3.37295e-06
Esophagus_Mucosa.portal.eqtl:rs2548459	19	49209339	ENSG00000176920.10	FUT2	49199228	-12.834	-0.789909	2.14492e-20	9.999e-05	3.37295e-06
Esophagus_Mucosa.portal.eqtl:rs570794	19	49207651	ENSG00000176920.10	FUT2	49199228	-12.8036	-0.800783	2.41943e-20	9.999e-05	3.37295e-06
Esophagus_Mucosa.portal.eqtl:rs1704773	19	49209566	ENSG00000176920.10	FUT2	49199228	-12.7842	-0.786957	2.61358e-20	9.999e-05	3.37295e-06
Esophagus_Mucosa.portal.eqtl:rs507855	19	49208501	ENSG00000176920.10	FUT2	49199228	-12.7813	-0.807153	2.64389e-20	9.999e-05	3.37295e-06
Esophagus_Mucosa.portal.eqtl:rs507766	19	49208543	ENSG00000176920.10	FUT2	49199228	-12.7596	-0.795064	2.88118e-20	9.999e-05	3.37295e-06
Esophagus_Mucosa.portal.eqtl:rs503279	19	49209010	ENSG00000176920.10	FUT2	49199228	-12.7565	-0.794996	2.9166e-20	9.999e-05	3.37295e-06
Esophagus_Mucosa.portal.eqtl:rs504963	19	49208865	ENSG00000176920.10	FUT2	49199228	-12.7565	-0.794996	2.9166e-20	9.999e-05	3.37295e-06
Esophagus_Mucosa.portal.eqtl:rs506897	19	49208629	ENSG00000176920.10	FUT2	49199228	-12.7565	-0.794996	2.9166e-20	9.999e-05	3.37295e-06
Esophagus_Mucosa.portal.eqtl:rs507711	19	49208564	ENSG00000176920.10	FUT2	49199228	-12.7565	-0.794996	2.9166e-20	9.999e-05	3.37295e-06
Esophagus_Mucosa.portal.eqtl:rs569970	19	49207718	ENSG00000176920.10	FUT2	49199228	-12.7565	-0.794996	2.9166e-20	9.999e-05	3.37295e-06
Esophagus_Mucosa.portal.eqtl:rs692854	19	49209464	ENSG00000176920.10	FUT2	49199228	-12.7477	-0.795248	3.02095e-20	9.999e-05	3.37295e-06
Esophagus_Mucosa.portal.eqtl:rs646327	19	49209851	ENSG00000176920.10	FUT2	49199228	-12.7373	-0.795743	3.14796e-20	9.999e-05	3.37295e-06
Esophagus_Mucosa.portal.eqtl:rs584768	19	49213284	ENSG00000176920.10	FUT2	49199228	-12.5033	-0.785059	8.01055e-20	9.999e-05	3.37295e-06
Esophagus_Mucosa.portal.eqtl:rs2452170	19	49213504	ENSG00000176920.10	FUT2	49199228	-12.4829	-0.783401	8.69358e-20	9.999e-05	3.37295e-06
Esophagus_Mucosa.portal.eqtl:rs632111	19	49208978	ENSG00000176920.10	FUT2	49199228	-12.4597	-0.785152	9.53806e-20	9.999e-05	3.37295e-06
Esophagus_Mucosa.portal.eqtl:rs2638282	19	49213833	ENSG00000176920.10	FUT2	49199228	-12.4359	-0.780248	1.04935e-19	9.999e-05	3.37295e-06
Esophagus_Mucosa.portal.eqtl:rs602662	19	49206985	ENSG00000176920.10	FUT2	49199228	-12.2789	-0.805422	1.97297e-19	9.999e-05	3.37295e-06
Esophagus_Mucosa.portal.eqtl:rs660745	19	49219459	ENSG00000176920.10	FUT2	49199228	-12.0994	-0.813139	4.07558e-19	9.999e-05	3.37295e-06
Esophagus_Mucosa.portal.eqtl:rs35866622	19	49218060	ENSG00000176920.10	FUT2	49199228	-11.4546	-0.809893	5.69262e-18	9.999e-05	3.37295e-06
Esophagus_Mucosa.portal.eqtl:rs676388	19	49211969	ENSG00000176920.10	FUT2	49199228	-11.4038	-0.772753	7.02069e-18	9.999e-05	3.37295e-06
Esophagus_Mucosa.portal.eqtl:rs4002471	19	49215095	ENSG00000176920.10	FUT2	49199228	-11.206	-0.773518	1.59222e-17	9.999e-05	3.37295e-06
Esophagus_Mucosa.portal.eqtl:rs8112983	19	49229525	ENSG00000176920.10	FUT2	49199228	-10.9863	-0.759617	3.97389e-17	9.999e-05	3.37295e-06
Esophagus_Mucosa.portal.eqtl:rs11666792	19	49227043	ENSG00000176920.10	FUT2	49199228	-10.9814	-0.756856	4.05585e-17	9.999e-05	3.37295e-06
Esophagus_Mucosa.portal.eqtl:rs11878908	19	49227443	ENSG00000176920.10	FUT2	49199228	-10.9814	-0.756856	4.05585e-17	9.999e-05	3.37295e-06
Esophagus_Mucosa.portal.eqtl:rs12979891	19	49227256	ENSG00000176920.10	FUT2	49199228	-10.9814	-0.756856	4.05585e-17	9.999e-05	3.37295e-06
Esophagus_Mucosa.portal.eqtl:rs2287921	19	49228272	ENSG00000176920.10	FUT2	49199228	-10.9814	-0.756856	4.05585e-17	9.999e-05	3.37295e-06
Esophagus_Mucosa.portal.eqtl:rs11672900	19	49220323	ENSG00000176920.10	FUT2	49199228	-10.8824	-0.77884	6.13535e-17	9.999e-05	3.37295e-06
Esophagus_Mucosa.portal.eqtl:rs12978750	19	49218430	ENSG00000176920.10	FUT2	49199228	-10.8711	-0.769502	6.43111e-17	9.999e-05	3.37295e-06
Esophagus_Mucosa.portal.eqtl:rs12978752	19	49218437	ENSG00000176920.10	FUT2	49199228	-10.8711	-0.769502	6.43111e-17	9.999e-05	3.37295e-06
Esophagus_Mucosa.portal.eqtl:rs33988101	19	49218111	ENSG00000176920.10	FUT2	49199228	-10.8711	-0.769502	6.43111e-17	9.999e-05	3.37295e-06
Esophagus_Mucosa.portal.eqtl:rs11882796	19	49225766	ENSG00000176920.10	FUT2	49199228	-10.8617	-0.758094	6.68835e-17	9.999e-05	3.37295e-06
Whole_Blood.portal.eqtl:rs778148	2	61606866	ENSG00000173209.17	AHSA2	61404553	9.37308	0.482632	1.2347e-16	9.999e-05	8.18579e-06
Esophagus_Mucosa.portal.eqtl:rs12979278	19	49218602	ENSG00000176920.10	FUT2	49199228	-10.632	-0.748819	1.75427e-16	9.999e-05	3.37295e-06
Esophagus_Mucosa.portal.eqtl:rs281379	19	49214274	ENSG00000176920.10	FUT2	49199228	-10.61	-0.759262	1.92387e-16	9.999e-05	3.37295e-06
Esophagus_Mucosa.portal.eqtl:rs2287922	19	49232226	ENSG00000176920.10	FUT2	49199228	-10.4481	-0.739734	3.8081e-16	9.999e-05	3.37295e-06
Whole_Blood.portal.eqtl:rs2694642	2	61596180	ENSG00000173209.17	AHSA2	61404553	9.0798	0.473062	6.95481e-16	9.999e-05	8.18579e-06
Whole_Blood.portal.eqtl:rs12612677	2	61729695	ENSG00000173209.17	AHSA2	61404553	-9.04267	-0.480652	8.64786e-16	9.999e-05	8.18579e-06
Whole_Blood.portal.eqtl:rs13003376	2	61691440	ENSG00000173209.17	AHSA2	61404553	-9.0351	-0.464044	9.04047e-16	9.999e-05	8.18579e-06
Esophagus_Mucosa.portal.eqtl:rs838147	19	49246866	ENSG00000176920.10	FUT2	49199228	10.2273	0.737066	9.69581e-16	9.999e-05	3.37295e-06
Whole_Blood.portal.eqtl:rs777593	2	61419103	ENSG00000173209.17	AHSA2	61404553	-9.02046	-0.466303	9.85062e-16	9.999e-05	8.18579e-06
Whole_Blood.portal.eqtl:rs12615783	2	61440947	ENSG00000173209.17	AHSA2	61404553	9.01638	0.464687	1.00887e-15	9.999e-05	8.18579e-06
Esophagus_Mucosa.portal.eqtl:rs479486	19	49229323	ENSG00000176920.10	FUT2	49199228	-10.2098	-0.738655	1.04459e-15	9.999e-05	3.37295e-06
Whole_Blood.portal.eqtl:rs7557230	2	61736652	ENSG00000173209.17	AHSA2	61404553	-8.98976	-0.469858	1.17917e-15	9.999e-05	8.18579e-06
Whole_Blood.portal.eqtl:rs2694644	2	61604856	ENSG00000173209.17	AHSA2	61404553	8.98942	0.470652	1.18152e-15	9.999e-05	8.18579e-06
Whole_Blood.portal.eqtl:rs2694639	2	61595291	ENSG00000173209.17	AHSA2	61404553	8.9886	0.470643	1.1872e-15	9.999e-05	8.18579e-06
Whole_Blood.portal.eqtl:rs2694643	2	61604383	ENSG00000173209.17	AHSA2	61404553	8.9886	0.470643	1.1872e-15	9.999e-05	8.18579e-06
Whole_Blood.portal.eqtl:rs4672436	2	61603357	ENSG00000173209.17	AHSA2	61404553	8.9886	0.470643	1.1872e-15	9.999e-05	8.18579e-06
Whole_Blood.portal.eqtl:rs778143	2	61581890	ENSG00000173209.17	AHSA2	61404553	8.9886	0.470643	1.1872e-15	9.999e-05	8.18579e-06
Whole_Blood.portal.eqtl:rs9677047	2	61585295	ENSG00000173209.17	AHSA2	61404553	8.9886	0.470643	1.1872e-15	9.999e-05	8.18579e-06
Whole_Blood.portal.eqtl:rs2177962	2	61588070	ENSG00000173209.17	AHSA2	61404553	8.98848	0.470591	1.18805e-15	9.999e-05	8.18579e-06
Whole_Blood.portal.eqtl:rs2694651	2	61588642	ENSG00000173209.17	AHSA2	61404553	8.98848	0.470591	1.18805e-15	9.999e-05	8.18579e-06
Whole_Blood.portal.eqtl:rs6545872	2	61724568	ENSG00000173209.17	AHSA2	61404553	-8.98436	-0.467438	1.21699e-15	9.999e-05	8.18579e-06
Whole_Blood.portal.eqtl:rs11125885	2	61755728	ENSG00000173209.17	AHSA2	61404553	-8.9777	-0.468707	1.26539e-15	9.999e-05	8.18579e-06
Whole_Blood.portal.eqtl:rs12713439	2	61752154	ENSG00000173209.17	AHSA2	61404553	-8.97763	-0.468701	1.26596e-15	9.999e-05	8.18579e-06
Whole_Blood.portal.eqtl:rs2305156	2	61729268	ENSG00000173209.17	AHSA2	61404553	-8.97763	-0.468701	1.26596e-15	9.999e-05	8.18579e-06
Whole_Blood.portal.eqtl:rs3732170	2	61749716	ENSG00000173209.17	AHSA2	61404553	-8.97763	-0.468701	1.26596e-15	9.999e-05	8.18579e-06
Whole_Blood.portal.eqtl:rs6545877	2	61741947	ENSG00000173209.17	AHSA2	61404553	-8.97763	-0.468701	1.26596e-15	9.999e-05	8.18579e-06
Whole_Blood.portal.eqtl:rs7421663	2	61753786	ENSG00000173209.17	AHSA2	61404553	-8.97763	-0.468701	1.26596e-15	9.999e-05	8.18579e-06
Whole_Blood.portal.eqtl:rs7606167	2	61742654	ENSG00000173209.17	AHSA2	61404553	-8.97763	-0.468701	1.26596e-15	9.999e-05	8.18579e-06
Whole_Blood.portal.eqtl:rs9309336	2	61763165	ENSG00000173209.17	AHSA2	61404553	-8.97763	-0.468701	1.26596e-15	9.999e-05	8.18579e-06
Whole_Blood.portal.eqtl:rs9989775	2	61761774	ENSG00000173209.17	AHSA2	61404553	-8.97763	-0.468701	1.26596e-15	9.999e-05	8.18579e-06
Whole_Blood.portal.eqtl:rs2694636	2	61677137	ENSG00000173209.17	AHSA2	61404553	-8.97465	-0.461201	1.28821e-15	9.999e-05	8.18579e-06
Whole_Blood.portal.eqtl:rs11691734	2	61702466	ENSG00000173209.17	AHSA2	61404553	-8.97343	-0.456304	1.29746e-15	9.999e-05	8.18579e-06
Whole_Blood.portal.eqtl:rs1867839	2	61694797	ENSG00000173209.17	AHSA2	61404553	-8.97078	-0.456221	1.31772e-15	9.999e-05	8.18579e-06
Whole_Blood.portal.eqtl:rs778142	2	61681428	ENSG00000173209.17	AHSA2	61404553	-8.96851	-0.464475	1.3353e-15	9.999e-05	8.18579e-06
Whole_Blood.portal.eqtl:rs2593625	2	61668769	ENSG00000173209.17	AHSA2	61404553	-8.95741	-0.462541	1.42494e-15	9.999e-05	8.18579e-06
Whole_Blood.portal.eqtl:rs2442031	2	61613785	ENSG00000173209.17	AHSA2	61404553	8.95711	0.464068	1.42742e-15	9.999e-05	8.18579e-06
Whole_Blood.portal.eqtl:rs4672445	2	61655008	ENSG00000173209.17	AHSA2	61404553	8.9548	0.462322	1.44687e-15	9.999e-05	8.18579e-06
Whole_Blood.portal.eqtl:rs2264100	2	61670829	ENSG00000173209.17	AHSA2	61404553	-8.95472	-0.462306	1.44757e-15	9.999e-05	8.18579e-06
Whole_Blood.portal.eqtl:rs9679557	2	61709349	ENSG00000173209.17	AHSA2	61404553	-8.95472	-0.462306	1.44757e-15	9.999e-05	8.18579e-06
Whole_Blood.portal.eqtl:rs10190332	2	61619267	ENSG00000173209.17	AHSA2	61404553	8.95472	0.462306	1.44757e-15	9.999e-05	8.18579e-06
Whole_Blood.portal.eqtl:rs1900572	2	61650715	ENSG00000173209.17	AHSA2	61404553	8.95472	0.462306	1.44757e-15	9.999e-05	8.18579e-06
Whole_Blood.portal.eqtl:rs2593627	2	61618574	ENSG00000173209.17	AHSA2	61404553	8.95472	0.462306	1.44757e-15	9.999e-05	8.18579e-06
Whole_Blood.portal.eqtl:rs6545867	2	61651027	ENSG00000173209.17	AHSA2	61404553	8.95472	0.462306	1.44757e-15	9.999e-05	8.18579e-06
Whole_Blood.portal.eqtl:rs6545871	2	61692203	ENSG00000173209.17	AHSA2	61404553	-8.95438	-0.462241	1.45046e-15	9.999e-05	8.18579e-06
Whole_Blood.portal.eqtl:rs2950268	2	61615763	ENSG00000173209.17	AHSA2	61404553	8.95326	0.463893	1.45998e-15	9.999e-05	8.18579e-06
Whole_Blood.portal.eqtl:rs2694625	2	61616055	ENSG00000173209.17	AHSA2	61404553	8.95275	0.46387	1.46434e-15	9.999e-05	8.18579e-06
Whole_Blood.portal.eqtl:rs2442034	2	61615667	ENSG00000173209.17	AHSA2	61404553	8.95273	0.463905	1.46451e-15	9.999e-05	8.18579e-06
Whole_Blood.portal.eqtl:rs7560978	2	61619588	ENSG00000173209.17	AHSA2	61404553	8.95112	0.462846	1.47831e-15	9.999e-05	8.18579e-06
Whole_Blood.portal.eqtl:rs778140	2	61682976	ENSG00000173209.17	AHSA2	61404553	-8.95051	-0.463754	1.48365e-15	9.999e-05	8.18579e-06
Whole_Blood.portal.eqtl:rs4672425	2	61444998	ENSG00000173209.17	AHSA2	61404553	8.94999	0.463586	1.48814e-15	9.999e-05	8.18579e-06
Whole_Blood.portal.eqtl:rs778141	2	61682178	ENSG00000173209.17	AHSA2	61404553	-8.94961	-0.463682	1.49146e-15	9.999e-05	8.18579e-06
Whole_Blood.portal.eqtl:rs1186711	2	61688505	ENSG00000173209.17	AHSA2	61404553	-8.94938	-0.4638	1.49344e-15	9.999e-05	8.18579e-06
Whole_Blood.portal.eqtl:rs1186697	2	61661417	ENSG00000173209.17	AHSA2	61404553	-8.9492	-0.463681	1.49501e-15	9.999e-05	8.18579e-06
Whole_Blood.portal.eqtl:rs778154	2	61646631	ENSG00000173209.17	AHSA2	61404553	8.9492	0.463693	1.49501e-15	9.999e-05	8.18579e-06
Whole_Blood.portal.eqtl:rs2256615	2	61679894	ENSG00000173209.17	AHSA2	61404553	-8.94915	-0.463681	1.49552e-15	9.999e-05	8.18579e-06
Whole_Blood.portal.eqtl:rs796597	2	61681060	ENSG00000173209.17	AHSA2	61404553	-8.94915	-0.463681	1.49552e-15	9.999e-05	8.18579e-06
Whole_Blood.portal.eqtl:rs2463100	2	61659199	ENSG00000173209.17	AHSA2	61404553	8.94879	0.46368	1.49863e-15	9.999e-05	8.18579e-06
Whole_Blood.portal.eqtl:rs4430924	2	61703856	ENSG00000173209.17	AHSA2	61404553	-8.94861	-0.46368	1.5002e-15	9.999e-05	8.18579e-06
Whole_Blood.portal.eqtl:rs778155	2	61647901	ENSG00000173209.17	AHSA2	61404553	8.94861	0.46368	1.5002e-15	9.999e-05	8.18579e-06
Whole_Blood.portal.eqtl:rs2442029	2	61679552	ENSG00000173209.17	AHSA2	61404553	-8.94845	-0.463685	1.50165e-15	9.999e-05	8.18579e-06
Whole_Blood.portal.eqtl:rs2121660	2	61653058	ENSG00000173209.17	AHSA2	61404553	8.94695	0.463631	1.51483e-15	9.999e-05	8.18579e-06
Whole_Blood.portal.eqtl:rs13023037	2	61620989	ENSG00000173209.17	AHSA2	61404553	8.94576	0.463473	1.52545e-15	9.999e-05	8.18579e-06
Whole_Blood.portal.eqtl:rs11678419	2	61743377	ENSG00000173209.17	AHSA2	61404553	-8.93416	-0.467587	1.63245e-15	9.999e-05	8.18579e-06
Whole_Blood.portal.eqtl:rs778144	2	61583128	ENSG00000173209.17	AHSA2	61404553	8.92649	0.464642	1.70735e-15	9.999e-05	8.18579e-06
Whole_Blood.portal.eqtl:rs7602859	2	61458206	ENSG00000173209.17	AHSA2	61404553	8.92387	0.458024	1.73373e-15	9.999e-05	8.18579e-06
Whole_Blood.portal.eqtl:rs778152	2	61608540	ENSG00000173209.17	AHSA2	61404553	8.91774	0.464682	1.79691e-15	9.999e-05	8.18579e-06
Whole_Blood.portal.eqtl:rs2600661	2	61543081	ENSG00000173209.17	AHSA2	61404553	8.91209	0.467849	1.85717e-15	9.999e-05	8.18579e-06
Esophagus_Mucosa.portal.eqtl:rs35106244	19	49203829	ENSG00000176920.10	FUT2	49199228	-10.0382	-0.777195	2.16631e-15	9.999e-05	3.37295e-06
Whole_Blood.portal.eqtl:rs6709441	2	61436930	ENSG00000173209.17	AHSA2	61404553	8.87875	0.458958	2.25639e-15	9.999e-05	8.18579e-06
Whole_Blood.portal.eqtl:rs6739427	2	61452879	ENSG00000173209.17	AHSA2	61404553	8.87766	0.456272	2.2707e-15	9.999e-05	8.18579e-06
Whole_Blood.portal.eqtl:rs4671399	2	61458518	ENSG00000173209.17	AHSA2	61404553	8.87653	0.45288	2.28582e-15	9.999e-05	8.18579e-06
Whole_Blood.portal.eqtl:rs4672426	2	61457148	ENSG00000173209.17	AHSA2	61404553	8.87653	0.45288	2.28582e-15	9.999e-05	8.18579e-06
Esophagus_Mucosa.portal.eqtl:rs973579	19	49241976	ENSG00000176920.10	FUT2	49199228	-9.99533	-0.72561	2.59969e-15	9.999e-05	3.37295e-06
Esophagus_Mucosa.portal.eqtl:rs418464	19	49239026	ENSG00000176920.10	FUT2	49199228	-9.99518	-0.725605	2.60135e-15	9.999e-05	3.37295e-06
Whole_Blood.portal.eqtl:rs1880866	2	61698972	ENSG00000173209.17	AHSA2	61404553	-8.85331	-0.446599	2.6173e-15	9.999e-05	8.18579e-06
Whole_Blood.portal.eqtl:rs6705235	2	61713580	ENSG00000173209.17	AHSA2	61404553	-8.83346	-0.458273	2.9384e-15	9.999e-05	8.18579e-06
Whole_Blood.portal.eqtl:rs3821222	2	61713526	ENSG00000173209.17	AHSA2	61404553	-8.83324	-0.458264	2.94214e-15	9.999e-05	8.18579e-06
Whole_Blood.portal.eqtl:rs12473030	2	61720497	ENSG00000173209.17	AHSA2	61404553	-8.82336	-0.463024	3.11662e-15	9.999e-05	8.18579e-06
Whole_Blood.portal.eqtl:rs2600663	2	61540687	ENSG00000173209.17	AHSA2	61404553	8.82152	0.462382	3.15023e-15	9.999e-05	8.18579e-06
Whole_Blood.portal.eqtl:rs6545848	2	61461183	ENSG00000173209.17	AHSA2	61404553	8.81821	0.453019	3.21141e-15	9.999e-05	8.18579e-06
Whole_Blood.portal.eqtl:rs12713437	2	61722904	ENSG00000173209.17	AHSA2	61404553	-8.81103	-0.462707	3.3487e-15	9.999e-05	8.18579e-06
Esophagus_Mucosa.portal.eqtl:rs838145	19	49248730	ENSG00000176920.10	FUT2	49199228	9.92422	0.772433	3.52033e-15	9.999e-05	3.37295e-06
Whole_Blood.portal.eqtl:rs13004855	2	61505072	ENSG00000173209.17	AHSA2	61404553	8.79812	0.462875	3.61002e-15	9.999e-05	8.18579e-06
Whole_Blood.portal.eqtl:rs7561229	2	61737990	ENSG00000173209.17	AHSA2	61404553	-8.78768	-0.451221	3.83619e-15	9.999e-05	8.18579e-06
Whole_Blood.portal.eqtl:rs12617911	2	61740825	ENSG00000173209.17	AHSA2	61404553	-8.78751	-0.451212	3.84001e-15	9.999e-05	8.18579e-06
Whole_Blood.portal.eqtl:rs1992765	2	61751333	ENSG00000173209.17	AHSA2	61404553	-8.78751	-0.451212	3.84001e-15	9.999e-05	8.18579e-06
Whole_Blood.portal.eqtl:rs2305155	2	61729258	ENSG00000173209.17	AHSA2	61404553	-8.78751	-0.451212	3.84001e-15	9.999e-05	8.18579e-06
Whole_Blood.portal.eqtl:rs6545873	2	61733012	ENSG00000173209.17	AHSA2	61404553	-8.78751	-0.451212	3.84001e-15	9.999e-05	8.18579e-06
Whole_Blood.portal.eqtl:rs766447	2	61735569	ENSG00000173209.17	AHSA2	61404553	-8.78751	-0.451212	3.84001e-15	9.999e-05	8.18579e-06
Whole_Blood.portal.eqtl:rs1186710	2	61688727	ENSG00000173209.17	AHSA2	61404553	-8.77711	-0.445877	4.07945e-15	9.999e-05	8.18579e-06
Whole_Blood.portal.eqtl:rs7588814	2	61695589	ENSG00000173209.17	AHSA2	61404553	-8.77136	-0.445423	4.21823e-15	9.999e-05	8.18579e-06
Whole_Blood.portal.eqtl:rs2256617	2	61679924	ENSG00000173209.17	AHSA2	61404553	-8.77094	-0.445409	4.22864e-15	9.999e-05	8.18579e-06
Whole_Blood.portal.eqtl:rs2694635	2	61676940	ENSG00000173209.17	AHSA2	61404553	-8.77094	-0.445409	4.22864e-15	9.999e-05	8.18579e-06
Whole_Blood.portal.eqtl:rs2252662	2	61670731	ENSG00000173209.17	AHSA2	61404553	-8.77073	-0.445402	4.23388e-15	9.999e-05	8.18579e-06
Whole_Blood.portal.eqtl:rs12713436	2	61691260	ENSG00000173209.17	AHSA2	61404553	-8.76911	-0.445349	4.27378e-15	9.999e-05	8.18579e-06
Whole_Blood.portal.eqtl:rs2463102	2	61571295	ENSG00000173209.17	AHSA2	61404553	8.76323	0.45369	4.42265e-15	9.999e-05	8.18579e-06
Whole_Blood.portal.eqtl:rs12620105	2	61512321	ENSG00000173209.17	AHSA2	61404553	8.72428	0.460346	5.54572e-15	9.999e-05	8.18579e-06
Whole_Blood.portal.eqtl:rs6749226	2	61509783	ENSG00000173209.17	AHSA2	61404553	8.72032	0.460243	5.67476e-15	9.999e-05	8.18579e-06
Whole_Blood.portal.eqtl:rs778768	2	61790289	ENSG00000173209.17	AHSA2	61404553	-8.65559	-0.463119	8.26052e-15	9.999e-05	8.18579e-06
Whole_Blood.portal.eqtl:rs9807965	2	61732159	ENSG00000173209.17	AHSA2	61404553	-8.65341	-0.447384	8.36568e-15	9.999e-05	8.18579e-06
Whole_Blood.portal.eqtl:rs6734830	2	61731112	ENSG00000173209.17	AHSA2	61404553	-8.65335	-0.447368	8.36817e-15	9.999e-05	8.18579e-06
Whole_Blood.portal.eqtl:rs7563678	2	61741811	ENSG00000173209.17	AHSA2	61404553	-8.65292	-0.447353	8.38944e-15	9.999e-05	8.18579e-06
Whole_Blood.portal.eqtl:rs12986713	2	61740646	ENSG00000173209.17	AHSA2	61404553	-8.6487	-0.461268	8.59687e-15	9.999e-05	8.18579e-06
Whole_Blood.portal.eqtl:rs3771258	2	61764140	ENSG00000173209.17	AHSA2	61404553	-8.64455	-0.463188	8.80597e-15	9.999e-05	8.18579e-06
Whole_Blood.portal.eqtl:rs1562308	2	61768421	ENSG00000173209.17	AHSA2	61404553	-8.64369	-0.463163	8.8499e-15	9.999e-05	8.18579e-06
Whole_Blood.portal.eqtl:rs778752	2	61776902	ENSG00000173209.17	AHSA2	61404553	-8.64208	-0.463104	8.93307e-15	9.999e-05	8.18579e-06
Whole_Blood.portal.eqtl:rs6718887	2	61727215	ENSG00000173209.17	AHSA2	61404553	-8.62858	-0.446669	9.65895e-15	9.999e-05	8.18579e-06
Whole_Blood.portal.eqtl:rs777589	2	61425621	ENSG00000173209.17	AHSA2	61404553	-8.62726	-0.446353	9.73307e-15	9.999e-05	8.18579e-06
Whole_Blood.portal.eqtl:rs778763	2	61785639	ENSG00000173209.17	AHSA2	61404553	-8.62108	-0.462838	1.00874e-14	9.999e-05	8.18579e-06
Whole_Blood.portal.eqtl:rs12713438	2	61725501	ENSG00000173209.17	AHSA2	61404553	-8.59244	-0.44128	1.19049e-14	9.999e-05	8.18579e-06
Whole_Blood.portal.eqtl:rs1838978	2	61540923	ENSG00000173209.17	AHSA2	61404553	8.57935	0.45891	1.28407e-14	9.999e-05	8.18579e-06
Whole_Blood.portal.eqtl:rs3771260	2	61762384	ENSG00000173209.17	AHSA2	61404553	-8.57452	-0.434187	1.3204e-14	9.999e-05	8.18579e-06
Whole_Blood.portal.eqtl:rs2694634	2	61551435	ENSG00000173209.17	AHSA2	61404553	8.54993	0.451196	1.5219e-14	9.999e-05	8.18579e-06
Whole_Blood.portal.eqtl:rs7572603	2	61552145	ENSG00000173209.17	AHSA2	61404553	8.54992	0.451191	1.522e-14	9.999e-05	8.18579e-06
Whole_Blood.portal.eqtl:rs778157	2	61554289	ENSG00000173209.17	AHSA2	61404553	8.54989	0.451183	1.52221e-14	9.999e-05	8.18579e-06
Whole_Blood.portal.eqtl:rs778158	2	61555421	ENSG00000173209.17	AHSA2	61404553	8.54988	0.451178	1.52231e-14	9.999e-05	8.18579e-06
Whole_Blood.portal.eqtl:rs12997538	2	61564249	ENSG00000173209.17	AHSA2	61404553	8.54946	0.459693	1.52598e-14	9.999e-05	8.18579e-06
Whole_Blood.portal.eqtl:rs2593633	2	61571513	ENSG00000173209.17	AHSA2	61404553	8.53125	0.44604	1.69511e-14	9.999e-05	8.18579e-06
Whole_Blood.portal.eqtl:rs778767	2	61787028	ENSG00000173209.17	AHSA2	61404553	-8.52956	-0.445823	1.71169e-14	9.999e-05	8.18579e-06
Whole_Blood.portal.eqtl:rs1465042	2	61572322	ENSG00000173209.17	AHSA2	61404553	8.52105	0.450544	1.79782e-14	9.999e-05	8.18579e-06
Whole_Blood.portal.eqtl:rs6707830	2	61749472	ENSG00000173209.17	AHSA2	61404553	-8.51706	-0.432924	1.83963e-14	9.999e-05	8.18579e-06
Whole_Blood.portal.eqtl:rs35585307	2	61760141	ENSG00000173209.17	AHSA2	61404553	-8.47652	-0.432487	2.32361e-14	9.999e-05	8.18579e-06
Whole_Blood.portal.eqtl:rs777590	2	61417145	ENSG00000173209.17	AHSA2	61404553	-8.46488	-0.449002	2.48458e-14	9.999e-05	8.18579e-06
Whole_Blood.portal.eqtl:rs6545845	2	61437044	ENSG00000173209.17	AHSA2	61404553	8.45754	0.443318	2.59185e-14	9.999e-05	8.18579e-06
Whole_Blood.portal.eqtl:rs2177961	2	61560264	ENSG00000173209.17	AHSA2	61404553	8.45613	0.44875	2.61292e-14	9.999e-05	8.18579e-06
Esophagus_Mucosa.portal.eqtl:rs439523	19	49236102	ENSG00000176920.10	FUT2	49199228	-9.45495	-0.70516	2.62473e-14	9.999e-05	3.37295e-06
Whole_Blood.portal.eqtl:rs3771261	2	61762161	ENSG00000173209.17	AHSA2	61404553	-8.45369	-0.432098	2.64987e-14	9.999e-05	8.18579e-06
Whole_Blood.portal.eqtl:rs10173974	2	61748900	ENSG00000173209.17	AHSA2	61404553	-8.45266	-0.432045	2.66563e-14	9.999e-05	8.18579e-06
Whole_Blood.portal.eqtl:rs10186325	2	61757721	ENSG00000173209.17	AHSA2	61404553	-8.45266	-0.432045	2.66563e-14	9.999e-05	8.18579e-06
Whole_Blood.portal.eqtl:rs12612982	2	61747355	ENSG00000173209.17	AHSA2	61404553	-8.45266	-0.432045	2.66563e-14	9.999e-05	8.18579e-06
Whole_Blood.portal.eqtl:rs3732171	2	61749690	ENSG00000173209.17	AHSA2	61404553	-8.45266	-0.432045	2.66563e-14	9.999e-05	8.18579e-06
Whole_Blood.portal.eqtl:rs9989864	2	61761637	ENSG00000173209.17	AHSA2	61404553	-8.45266	-0.432045	2.66563e-14	9.999e-05	8.18579e-06
Whole_Blood.portal.eqtl:rs778762	2	61782921	ENSG00000173209.17	AHSA2	61404553	-8.44915	-0.445071	2.71987e-14	9.999e-05	8.18579e-06
Whole_Blood.portal.eqtl:rs10496092	2	61524679	ENSG00000173209.17	AHSA2	61404553	8.42577	0.443402	3.11125e-14	9.999e-05	8.18579e-06
Whole_Blood.portal.eqtl:rs2427884	2	61775369	ENSG00000173209.17	AHSA2	61404553	-8.37572	-0.431562	4.14675e-14	9.999e-05	8.18579e-06
Whole_Blood.portal.eqtl:rs13413337	2	61747123	ENSG00000173209.17	AHSA2	61404553	-8.33067	-0.428854	5.36788e-14	9.999e-05	8.18579e-06
Whole_Blood.portal.eqtl:rs4672423	2	61435275	ENSG00000173209.17	AHSA2	61404553	8.32812	0.434306	5.44691e-14	9.999e-05	8.18579e-06
Whole_Blood.portal.eqtl:rs11887205	2	61774473	ENSG00000173209.17	AHSA2	61404553	-8.30941	-0.446541	6.06243e-14	9.999e-05	8.18579e-06
Whole_Blood.portal.eqtl:rs2421207	2	61769405	ENSG00000173209.17	AHSA2	61404553	-8.29499	-0.439204	6.58326e-14	9.999e-05	8.18579e-06
Esophagus_Mucosa.portal.eqtl:rs838144	19	49250239	ENSG00000176920.10	FUT2	49199228	9.22957	0.685815	6.92019e-14	9.999e-05	3.37295e-06
Lung.portal.eqtl:rs2307018	19	49244219	ENSG00000182264.4	IZUMO1	49250166	-8.63585	-0.697814	8.37639e-14	9.999e-05	2.0959e-06
Lung.portal.eqtl:rs2307019	19	49244220	ENSG00000182264.4	IZUMO1	49250166	-8.63585	-0.697814	8.37639e-14	9.999e-05	2.0959e-06
Whole_Blood.portal.eqtl:rs778758	2	61782161	ENSG00000173209.17	AHSA2	61404553	-8.20957	-0.443113	1.07193e-13	9.999e-05	8.18579e-06
Whole_Blood.portal.eqtl:rs6545883	2	61772257	ENSG00000173209.17	AHSA2	61404553	-8.1972	-0.426638	1.15017e-13	9.999e-05	8.18579e-06
Whole_Blood.portal.eqtl:rs6742276	2	61768745	ENSG00000173209.17	AHSA2	61404553	-8.13948	-0.426111	1.59705e-13	9.999e-05	8.18579e-06
Whole_Blood.portal.eqtl:rs2518933	2	61797030	ENSG00000173209.17	AHSA2	61404553	-8.12349	-0.448502	1.74883e-13	9.999e-05	8.18579e-06
Whole_Blood.portal.eqtl:rs7579651	2	61800279	ENSG00000173209.17	AHSA2	61404553	-8.10887	-0.450632	1.90011e-13	9.999e-05	8.18579e-06
Whole_Blood.portal.eqtl:rs2518937	2	61791954	ENSG00000173209.17	AHSA2	61404553	-8.03088	-0.437263	2.95514e-13	9.999e-05	8.18579e-06
Whole_Blood.portal.eqtl:rs2441382	2	61811480	ENSG00000173209.17	AHSA2	61404553	-8.02926	-0.4624	2.98222e-13	9.999e-05	8.18579e-06
Whole_Blood.portal.eqtl:rs2441381	2	61798829	ENSG00000173209.17	AHSA2	61404553	-8.00553	-0.436725	3.41013e-13	9.999e-05	8.18579e-06
Whole_Blood.portal.eqtl:rs2518932	2	61801277	ENSG00000173209.17	AHSA2	61404553	-8.0036	-0.438013	3.44746e-13	9.999e-05	8.18579e-06
Whole_Blood.portal.eqtl:rs2921718	2	61795267	ENSG00000173209.17	AHSA2	61404553	-7.98319	-0.432903	3.86829e-13	9.999e-05	8.18579e-06
Whole_Blood.portal.eqtl:rs777591	2	61417617	ENSG00000173209.17	AHSA2	61404553	-7.97311	-0.419163	4.09466e-13	9.999e-05	8.18579e-06
Esophagus_Mucosa.portal.eqtl:rs427248	19	49241015	ENSG00000176920.10	FUT2	49199228	-8.75365	-0.712279	5.39804e-13	9.999e-05	3.37295e-06
Whole_Blood.portal.eqtl:rs2084195	2	61756535	ENSG00000173209.17	AHSA2	61404553	-7.91936	-0.41432	5.54219e-13	9.999e-05	8.18579e-06
Whole_Blood.portal.eqtl:rs2427885	2	61816777	ENSG00000173209.17	AHSA2	61404553	-7.91745	-0.458719	5.60188e-13	9.999e-05	8.18579e-06
Whole_Blood.portal.eqtl:rs1562309	2	61770126	ENSG00000173209.17	AHSA2	61404553	-7.9139	-0.433021	5.71486e-13	9.999e-05	8.18579e-06
Lung.portal.eqtl:rs8102032	19	49249795	ENSG00000182264.4	IZUMO1	49250166	-8.25119	-0.685321	5.81237e-13	9.999e-05	2.0959e-06
Lung.portal.eqtl:rs8104897	19	49249814	ENSG00000182264.4	IZUMO1	49250166	-8.25119	-0.685321	5.81237e-13	9.999e-05	2.0959e-06
Lung.portal.eqtl:rs8105137	19	49249888	ENSG00000182264.4	IZUMO1	49250166	-8.25119	-0.685321	5.81237e-13	9.999e-05	2.0959e-06
Whole_Blood.portal.eqtl:rs777585	2	61412559	ENSG00000173209.17	AHSA2	61404553	-7.91087	-0.432215	5.81307e-13	9.999e-05	8.18579e-06
Whole_Blood.portal.eqtl:rs34484204	2	61774854	ENSG00000173209.17	AHSA2	61404553	-7.89813	-0.418043	6.24445e-13	9.999e-05	8.18579e-06
Esophagus_Mucosa.portal.eqtl:rs380743	19	49241014	ENSG00000176920.10	FUT2	49199228	-8.56493	-0.720587	1.22114e-12	9.999e-05	3.37295e-06
Whole_Blood.portal.eqtl:rs1971183	2	61716924	ENSG00000173209.17	AHSA2	61404553	-7.74112	-0.412444	1.50381e-12	9.999e-05	8.18579e-06
Whole_Blood.portal.eqtl:rs2592355	2	61803916	ENSG00000173209.17	AHSA2	61404553	-7.7328	-0.441893	1.57518e-12	9.999e-05	8.18579e-06
Whole_Blood.portal.eqtl:rs3094312	2	61804473	ENSG00000173209.17	AHSA2	61404553	-7.70976	-0.43946	1.79096e-12	9.999e-05	8.18579e-06
Whole_Blood.portal.eqtl:rs2441380	2	61775364	ENSG00000173209.17	AHSA2	61404553	-7.6883	-0.423092	2.01803e-12	9.999e-05	8.18579e-06
Esophagus_Mucosa.portal.eqtl:rs1231281	19	49239200	ENSG00000176920.10	FUT2	49199228	-8.41774	-0.657487	2.3091e-12	9.999e-05	3.37295e-06
Lung.portal.eqtl:rs12462324	19	49247086	ENSG00000182264.4	IZUMO1	49250166	-7.9462	-0.66809	2.67121e-12	9.999e-05	2.0959e-06
Lung.portal.eqtl:rs412712	19	49234299	ENSG00000182264.4	IZUMO1	49250166	-7.94173	-0.667066	2.73129e-12	9.999e-05	2.0959e-06
Lung.portal.eqtl:rs12460295	19	49247124	ENSG00000182264.4	IZUMO1	49250166	-7.9408	-0.667732	2.74402e-12	9.999e-05	2.0959e-06
Lung.portal.eqtl:rs56066508	19	49241400	ENSG00000182264.4	IZUMO1	49250166	-7.93028	-0.666991	2.89164e-12	9.999e-05	2.0959e-06
Lung.portal.eqtl:rs12981072	19	49241006	ENSG00000182264.4	IZUMO1	49250166	-7.93021	-0.666993	2.8926e-12	9.999e-05	2.0959e-06
Whole_Blood.portal.eqtl:rs6748003	2	61806700	ENSG00000173209.17	AHSA2	61404553	-7.58498	-0.443471	3.57948e-12	9.999e-05	8.18579e-06
Lung.portal.eqtl:rs11672046	19	49247601	ENSG00000182264.4	IZUMO1	49250166	-7.8704	-0.662873	3.8954e-12	9.999e-05	2.0959e-06
Lung.portal.eqtl:rs8111288	19	49247900	ENSG00000182264.4	IZUMO1	49250166	-7.86228	-0.662515	4.05584e-12	9.999e-05	2.0959e-06
Lung.portal.eqtl:rs8111208	19	49248022	ENSG00000182264.4	IZUMO1	49250166	-7.85479	-0.661974	4.20956e-12	9.999e-05	2.0959e-06
Lung.portal.eqtl:rs11083948	19	49248120	ENSG00000182264.4	IZUMO1	49250166	-7.85447	-0.66173	4.2164e-12	9.999e-05	2.0959e-06
Lung.portal.eqtl:rs12611201	19	49248255	ENSG00000182264.4	IZUMO1	49250166	-7.85447	-0.66173	4.2164e-12	9.999e-05	2.0959e-06
Lung.portal.eqtl:rs12611203	19	49248295	ENSG00000182264.4	IZUMO1	49250166	-7.85447	-0.66173	4.2164e-12	9.999e-05	2.0959e-06
Lung.portal.eqtl:rs12611211	19	49248331	ENSG00000182264.4	IZUMO1	49250166	-7.85447	-0.66173	4.2164e-12	9.999e-05	2.0959e-06
Lung.portal.eqtl:rs12982115	19	49248640	ENSG00000182264.4	IZUMO1	49250166	-7.85447	-0.66173	4.2164e-12	9.999e-05	2.0959e-06
Lung.portal.eqtl:rs8108468	19	49247786	ENSG00000182264.4	IZUMO1	49250166	-7.85447	-0.66173	4.2164e-12	9.999e-05	2.0959e-06
Lung.portal.eqtl:rs8111399	19	49247963	ENSG00000182264.4	IZUMO1	49250166	-7.85447	-0.66173	4.2164e-12	9.999e-05	2.0959e-06
Lung.portal.eqtl:rs12975033	19	49249443	ENSG00000182264.4	IZUMO1	49250166	-7.77907	-0.663965	6.13049e-12	9.999e-05	2.0959e-06
Esophagus_Mucosa.portal.eqtl:rs281377	19	49206603	ENSG00000176920.10	FUT2	49199228	8.18527	0.621574	6.31661e-12	9.999e-05	3.37295e-06
Whole_Blood.portal.eqtl:rs2592356	2	61810428	ENSG00000173209.17	AHSA2	61404553	-7.45216	-0.426783	7.44265e-12	9.999e-05	8.18579e-06
Lung.portal.eqtl:rs28400015	19	49250633	ENSG00000182264.4	IZUMO1	49250166	-7.73271	-0.662262	7.71389e-12	9.999e-05	2.0959e-06
Whole_Blood.portal.eqtl:rs2592358	2	61813377	ENSG00000173209.17	AHSA2	61404553	-7.44554	-0.432127	7.71836e-12	9.999e-05	8.18579e-06
Whole_Blood.portal.eqtl:rs4325736	2	61830144	ENSG00000173209.17	AHSA2	61404553	-7.40618	-0.425414	9.57759e-12	9.999e-05	8.18579e-06
Whole_Blood.portal.eqtl:rs28749199	2	61827052	ENSG00000173209.17	AHSA2	61404553	-7.3863	-0.425201	1.06786e-11	9.999e-05	8.18579e-06
Whole_Blood.portal.eqtl:rs2421331	2	61835240	ENSG00000173209.17	AHSA2	61404553	-7.34123	-0.404774	1.36605e-11	9.999e-05	8.18579e-06
Lung.portal.eqtl:rs8108136	19	49247693	ENSG00000182264.4	IZUMO1	49250166	-7.59792	-0.643137	1.50178e-11	9.999e-05	2.0959e-06
Whole_Blood.portal.eqtl:rs6545887	2	61828818	ENSG00000173209.17	AHSA2	61404553	-7.2869	-0.410587	1.83663e-11	9.999e-05	8.18579e-06
Whole_Blood.portal.eqtl:rs7574631	2	61825142	ENSG00000173209.17	AHSA2	61404553	-7.27906	-0.409624	1.9166e-11	9.999e-05	8.18579e-06
Lung.portal.eqtl:rs12979144	19	49237547	ENSG00000182264.4	IZUMO1	49250166	-7.45788	-0.642898	2.99126e-11	9.999e-05	2.0959e-06
Lung.portal.eqtl:rs12978499	19	49237552	ENSG00000182264.4	IZUMO1	49250166	-7.42547	-0.641698	3.50669e-11	9.999e-05	2.0959e-06
Lung.portal.eqtl:rs281408	19	49233406	ENSG00000182264.4	IZUMO1	49250166	-7.42407	-0.641627	3.53093e-11	9.999e-05	2.0959e-06
Esophagus_Mucosa.portal.eqtl:rs452270	19	49239053	ENSG00000176920.10	FUT2	49199228	-7.73425	-0.643841	4.44146e-11	9.999e-05	3.37295e-06
Whole_Blood.portal.eqtl:rs13413687	2	61835253	ENSG00000173209.17	AHSA2	61404553	-7.12045	-0.398891	4.52114e-11	9.999e-05	8.18579e-06
Lung.portal.eqtl:rs28400014	19	49250657	ENSG00000182264.4	IZUMO1	49250166	-7.31168	-0.623874	6.1191e-11	9.999e-05	2.0959e-06
Lung.portal.eqtl:rs11667321	19	49250538	ENSG00000182264.4	IZUMO1	49250166	-7.25241	-0.617514	8.16997e-11	9.999e-05	2.0959e-06
Lung.portal.eqtl:rs8106205	19	49250197	ENSG00000182264.4	IZUMO1	49250166	-7.25241	-0.617514	8.16997e-11	9.999e-05	2.0959e-06
Artery_Tibial.portal.eqtl:rs34307821	15	75256826	ENSG00000198794.7	SCAMP5	75287873	-7.10016	-0.516703	1.71129e-10	9.999e-05	7.59796e-06
Artery_Tibial.portal.eqtl:rs35882241	15	75260773	ENSG00000198794.7	SCAMP5	75287873	-7.09895	-0.516011	1.7214e-10	9.999e-05	7.59796e-06
Artery_Tibial.portal.eqtl:rs4886413	15	75262310	ENSG00000198794.7	SCAMP5	75287873	-7.09391	-0.515719	1.76388e-10	9.999e-05	7.59796e-06
Artery_Tibial.portal.eqtl:rs35556055	15	75253414	ENSG00000198794.7	SCAMP5	75287873	-7.0818	-0.515011	1.87034e-10	9.999e-05	7.59796e-06
Artery_Tibial.portal.eqtl:rs62029217	15	75261899	ENSG00000198794.7	SCAMP5	75287873	-7.0818	-0.515011	1.87034e-10	9.999e-05	7.59796e-06
Artery_Tibial.portal.eqtl:rs34799293	15	75258773	ENSG00000198794.7	SCAMP5	75287873	-7.06726	-0.51344	2.00658e-10	9.999e-05	7.59796e-06
Artery_Tibial.portal.eqtl:rs35103257	15	75277412	ENSG00000198794.7	SCAMP5	75287873	-7.0092	-0.520884	2.6557e-10	9.999e-05	7.59796e-06
Lung.portal.eqtl:rs12975781	19	49249698	ENSG00000182264.4	IZUMO1	49250166	-6.99266	-0.622462	2.87611e-10	9.999e-05	2.0959e-06
Esophagus_Mucosa.portal.eqtl:rs838133	19	49259529	ENSG00000176920.10	FUT2	49199228	7.16392	0.618634	5.1682e-10	9.999e-05	3.37295e-06
Thyroid.portal.eqtl:rs17145750	7	73026378	ENSG00000009950.11	MLXIPL	73038873	6.86567	0.974996	8.23764e-10	9.999e-05	7.96634e-06
Esophagus_Mucosa.portal.eqtl:rs739320	19	49261368	ENSG00000176920.10	FUT2	49199228	7.00509	0.630364	1.01939e-09	9.999e-05	3.37295e-06
Thyroid.portal.eqtl:rs35866503	7	73005776	ENSG00000009950.11	MLXIPL	73038873	6.77434	0.86782	1.25241e-09	9.999e-05	7.96634e-06
Thyroid.portal.eqtl:rs13247874	7	73010442	ENSG00000009950.11	MLXIPL	73038873	6.77415	0.867913	1.25352e-09	9.999e-05	7.96634e-06
Thyroid.portal.eqtl:rs1051921	7	73007943	ENSG00000009950.11	MLXIPL	73038873	6.77414	0.86781	1.25359e-09	9.999e-05	7.96634e-06
Thyroid.portal.eqtl:rs11974409	7	72989390	ENSG00000009950.11	MLXIPL	73038873	6.77414	0.86781	1.25359e-09	9.999e-05	7.96634e-06
Thyroid.portal.eqtl:rs34594435	7	72977249	ENSG00000009950.11	MLXIPL	73038873	6.77414	0.86781	1.25359e-09	9.999e-05	7.96634e-06
Thyroid.portal.eqtl:rs35659126	7	72988069	ENSG00000009950.11	MLXIPL	73038873	6.77414	0.86781	1.25359e-09	9.999e-05	7.96634e-06
Thyroid.portal.eqtl:rs35368205	7	73017657	ENSG00000009950.11	MLXIPL	73038873	6.77395	0.867812	1.25468e-09	9.999e-05	7.96634e-06
Thyroid.portal.eqtl:rs34346326	7	73016181	ENSG00000009950.11	MLXIPL	73038873	6.77362	0.867823	1.25658e-09	9.999e-05	7.96634e-06
Thyroid.portal.eqtl:rs9638180	7	72998952	ENSG00000009950.11	MLXIPL	73038873	6.7667	0.874133	1.29699e-09	9.999e-05	7.96634e-06
Thyroid.portal.eqtl:rs9638182	7	72999105	ENSG00000009950.11	MLXIPL	73038873	6.75561	0.873122	1.36453e-09	9.999e-05	7.96634e-06
Artery_Tibial.portal.eqtl:rs3812945	15	75289722	ENSG00000198794.7	SCAMP5	75287873	-6.66439	-0.473895	1.38158e-09	9.999e-05	7.59796e-06
Thyroid.portal.eqtl:rs55747707	7	73037366	ENSG00000009950.11	MLXIPL	73038873	6.74188	0.859478	1.45295e-09	9.999e-05	7.96634e-06
Esophagus_Mucosa.portal.eqtl:rs11667321	19	49250538	ENSG00000176920.10	FUT2	49199228	6.92028	0.556874	1.46362e-09	9.999e-05	3.37295e-06
Esophagus_Mucosa.portal.eqtl:rs8106205	19	49250197	ENSG00000176920.10	FUT2	49199228	6.92028	0.556874	1.46362e-09	9.999e-05	3.37295e-06
Thyroid.portal.eqtl:rs13225660	7	73006388	ENSG00000009950.11	MLXIPL	73038873	6.70478	0.872984	1.72136e-09	9.999e-05	7.96634e-06
Esophagus_Mucosa.portal.eqtl:rs8103840	19	49254955	ENSG00000176920.10	FUT2	49199228	6.87882	0.61011	1.74628e-09	9.999e-05	3.37295e-06
Artery_Tibial.portal.eqtl:rs35116156	15	75292074	ENSG00000198794.7	SCAMP5	75287873	-6.59281	-0.478796	1.93857e-09	9.999e-05	7.59796e-06
Whole_Blood.portal.eqtl:rs7608483	2	61836235	ENSG00000173209.17	AHSA2	61404553	-6.39682	-0.378575	2.02286e-09	9.999e-05	8.18579e-06
Whole_Blood.portal.eqtl:rs10779948	2	61844160	ENSG00000173209.17	AHSA2	61404553	-6.39394	-0.392394	2.05295e-09	9.999e-05	8.18579e-06
Artery_Tibial.portal.eqtl:rs11638576	15	75260387	ENSG00000198794.7	SCAMP5	75287873	-6.53822	-0.524219	2.50777e-09	9.999e-05	7.59796e-06
Esophagus_Mucosa.portal.eqtl:rs28400014	19	49250657	ENSG00000176920.10	FUT2	49199228	6.77687	0.54929	2.69344e-09	9.999e-05	3.37295e-06
Thyroid.portal.eqtl:rs13240994	7	73016862	ENSG00000009950.11	MLXIPL	73038873	6.5808	0.842146	3.02683e-09	9.999e-05	7.96634e-06
Thyroid.portal.eqtl:rs35493868	7	73039406	ENSG00000009950.11	MLXIPL	73038873	6.56864	0.838996	3.19849e-09	9.999e-05	7.96634e-06
Esophagus_Mucosa.portal.eqtl:rs12978499	19	49237552	ENSG00000176920.10	FUT2	49199228	6.72263	0.563077	3.3902e-09	9.999e-05	3.37295e-06
Esophagus_Mucosa.portal.eqtl:rs12979144	19	49237547	ENSG00000176920.10	FUT2	49199228	6.72263	0.563077	3.3902e-09	9.999e-05	3.37295e-06
Esophagus_Mucosa.portal.eqtl:rs281408	19	49233406	ENSG00000176920.10	FUT2	49199228	6.72259	0.56309	3.39082e-09	9.999e-05	3.37295e-06
Esophagus_Mucosa.portal.eqtl:rs12981072	19	49241006	ENSG00000176920.10	FUT2	49199228	6.71909	0.56359	3.44148e-09	9.999e-05	3.37295e-06
Esophagus_Mucosa.portal.eqtl:rs56066508	19	49241400	ENSG00000176920.10	FUT2	49199228	6.71888	0.56357	3.44448e-09	9.999e-05	3.37295e-06
Esophagus_Mucosa.portal.eqtl:rs412712	19	49234299	ENSG00000176920.10	FUT2	49199228	6.71827	0.563626	3.45342e-09	9.999e-05	3.37295e-06
Adipose_Subcutaneous.portal.eqtl:rs6739427	2	61452879	ENSG00000173209.17	AHSA2	61404553	6.5496	0.494227	3.61311e-09	9.999e-05	3.79073e-06
Muscle_Skeletal.portal.eqtl:rs12997538	2	61564249	ENSG00000173209.17	AHSA2	61404553	6.34179	0.384273	4.08362e-09	9.999e-05	4.61373e-06
Artery_Tibial.portal.eqtl:rs34484204	2	61774854	ENSG00000173209.17	AHSA2	61404553	-6.40065	-0.481363	4.78081e-09	9.999e-05	7.54981e-06
Thyroid.portal.eqtl:rs62466318	7	73042085	ENSG00000009950.11	MLXIPL	73038873	6.47914	0.835454	4.79618e-09	9.999e-05	7.96634e-06
Adipose_Subcutaneous.portal.eqtl:rs777590	2	61417145	ENSG00000173209.17	AHSA2	61404553	-6.47616	-0.491934	5.03119e-09	9.999e-05	3.79073e-06
Esophagus_Mucosa.portal.eqtl:rs3859439	19	49224389	ENSG00000176920.10	FUT2	49199228	-6.61549	-0.596548	5.3347e-09	9.999e-05	3.37295e-06
Adipose_Subcutaneous.portal.eqtl:rs6545845	2	61437044	ENSG00000173209.17	AHSA2	61404553	6.45795	0.489285	5.46082e-09	9.999e-05	3.79073e-06
Esophagus_Mucosa.portal.eqtl:rs519757	19	49224966	ENSG00000176920.10	FUT2	49199228	-6.59831	-0.593525	5.73626e-09	9.999e-05	3.37295e-06
Artery_Tibial.portal.eqtl:rs2304902	15	75340727	ENSG00000198794.7	SCAMP5	75287873	-6.35316	-0.491813	5.9663e-09	9.999e-05	7.59796e-06
Adipose_Subcutaneous.portal.eqtl:rs4672425	2	61444998	ENSG00000173209.17	AHSA2	61404553	6.43466	0.480204	6.06327e-09	9.999e-05	3.79073e-06
Artery_Tibial.portal.eqtl:rs12898551	15	75297907	ENSG00000198794.7	SCAMP5	75287873	-6.33699	-0.489556	6.43284e-09	9.999e-05	7.59796e-06
Stomach.portal.eqtl:rs2307018	19	49244219	ENSG00000105538.4	RASIP1	49243978	-6.87037	-0.712975	6.68958e-09	9.999e-05	7.32518e-07
Stomach.portal.eqtl:rs2307019	19	49244220	ENSG00000105538.4	RASIP1	49243978	-6.87037	-0.712975	6.68958e-09	9.999e-05	7.32518e-07
Stomach.portal.eqtl:rs56066508	19	49241400	ENSG00000105538.4	RASIP1	49243978	-6.87037	-0.712975	6.68958e-09	9.999e-05	7.32518e-07
Adipose_Subcutaneous.portal.eqtl:rs12615783	2	61440947	ENSG00000173209.17	AHSA2	61404553	6.40745	0.483455	6.85079e-09	9.999e-05	3.79073e-06
Artery_Tibial.portal.eqtl:rs12900072	15	75307148	ENSG00000198794.7	SCAMP5	75287873	-6.31514	-0.488801	7.1206e-09	9.999e-05	7.59796e-06
Artery_Tibial.portal.eqtl:rs4886417	15	75330159	ENSG00000198794.7	SCAMP5	75287873	-6.31514	-0.488801	7.1206e-09	9.999e-05	7.59796e-06
Artery_Tibial.portal.eqtl:rs4886648	15	75308837	ENSG00000198794.7	SCAMP5	75287873	-6.31514	-0.488801	7.1206e-09	9.999e-05	7.59796e-06
Artery_Tibial.portal.eqtl:rs7181261	15	75355583	ENSG00000198794.7	SCAMP5	75287873	-6.30262	-0.489278	7.54709e-09	9.999e-05	7.59796e-06
Adipose_Subcutaneous.portal.eqtl:rs778148	2	61606866	ENSG00000173209.17	AHSA2	61404553	6.38059	0.490181	7.72723e-09	9.999e-05	3.79073e-06
Esophagus_Mucosa.portal.eqtl:rs2307018	19	49244219	ENSG00000182264.4	IZUMO1	49250166	-6.52735	-0.751619	7.73716e-09	9.999e-05	1.9882e-06
Esophagus_Mucosa.portal.eqtl:rs2307019	19	49244220	ENSG00000182264.4	IZUMO1	49250166	-6.52735	-0.751619	7.73716e-09	9.999e-05	1.9882e-06
Esophagus_Mucosa.portal.eqtl:rs8102032	19	49249795	ENSG00000182264.4	IZUMO1	49250166	-6.52735	-0.751619	7.73716e-09	9.999e-05	1.9882e-06
Esophagus_Mucosa.portal.eqtl:rs8104897	19	49249814	ENSG00000182264.4	IZUMO1	49250166	-6.52735	-0.751619	7.73716e-09	9.999e-05	1.9882e-06
Esophagus_Mucosa.portal.eqtl:rs8105137	19	49249888	ENSG00000182264.4	IZUMO1	49250166	-6.52735	-0.751619	7.73716e-09	9.999e-05	1.9882e-06
Stomach.portal.eqtl:rs12981072	19	49241006	ENSG00000105538.4	RASIP1	49243978	-6.82534	-0.71277	7.91577e-09	9.999e-05	7.32518e-07
Adipose_Subcutaneous.portal.eqtl:rs777593	2	61419103	ENSG00000173209.17	AHSA2	61404553	-6.36291	-0.483859	8.36359e-09	9.999e-05	3.79073e-06
Artery_Tibial.portal.eqtl:rs778148	2	61606866	ENSG00000173209.17	AHSA2	61404553	6.27771	0.485474	8.47177e-09	9.999e-05	7.54981e-06
Adipose_Subcutaneous.portal.eqtl:rs4671399	2	61458518	ENSG00000173209.17	AHSA2	61404553	6.3576	0.480164	8.56476e-09	9.999e-05	3.79073e-06
Adipose_Subcutaneous.portal.eqtl:rs4672426	2	61457148	ENSG00000173209.17	AHSA2	61404553	6.3576	0.480164	8.56476e-09	9.999e-05	3.79073e-06
Adipose_Subcutaneous.portal.eqtl:rs6545848	2	61461183	ENSG00000173209.17	AHSA2	61404553	6.3576	0.480164	8.56476e-09	9.999e-05	3.79073e-06
Adipose_Subcutaneous.portal.eqtl:rs777589	2	61425621	ENSG00000173209.17	AHSA2	61404553	-6.35394	-0.481643	8.70599e-09	9.999e-05	3.79073e-06
Esophagus_Mucosa.portal.eqtl:rs629504	19	49223633	ENSG00000176920.10	FUT2	49199228	-6.49575	-0.606522	8.83823e-09	9.999e-05	3.37295e-06
Esophagus_Mucosa.portal.eqtl:rs546308	19	49223570	ENSG00000176920.10	FUT2	49199228	-6.47494	-0.606378	9.64631e-09	9.999e-05	3.37295e-06
Artery_Tibial.portal.eqtl:rs777593	2	61419103	ENSG00000173209.17	AHSA2	61404553	-6.23845	-0.474925	1.01604e-08	9.999e-05	7.54981e-06
Artery_Tibial.portal.eqtl:rs6709441	2	61436930	ENSG00000173209.17	AHSA2	61404553	6.23803	0.474922	1.01806e-08	9.999e-05	7.54981e-06
Artery_Tibial.portal.eqtl:rs12615783	2	61440947	ENSG00000173209.17	AHSA2	61404553	6.22561	0.47439	1.07817e-08	9.999e-05	7.54981e-06
Artery_Tibial.portal.eqtl:rs113362184	15	75349999	ENSG00000198794.7	SCAMP5	75287873	-6.21691	-0.483176	1.12239e-08	9.999e-05	7.59796e-06
Adipose_Subcutaneous.portal.eqtl:rs6709441	2	61436930	ENSG00000173209.17	AHSA2	61404553	6.29007	0.475192	1.1579e-08	9.999e-05	3.79073e-06
Thyroid.portal.eqtl:rs56383788	7	73016400	ENSG00000009950.11	MLXIPL	73038873	6.26842	0.832135	1.23608e-08	9.999e-05	7.96634e-06
Esophagus_Mucosa.portal.eqtl:rs8111208	19	49248022	ENSG00000176920.10	FUT2	49199228	6.40413	0.546743	1.2987e-08	9.999e-05	3.37295e-06
Esophagus_Mucosa.portal.eqtl:rs11083948	19	49248120	ENSG00000176920.10	FUT2	49199228	6.40222	0.546468	1.30913e-08	9.999e-05	3.37295e-06
Esophagus_Mucosa.portal.eqtl:rs11672046	19	49247601	ENSG00000176920.10	FUT2	49199228	6.40222	0.546468	1.30913e-08	9.999e-05	3.37295e-06
Esophagus_Mucosa.portal.eqtl:rs12460295	19	49247124	ENSG00000176920.10	FUT2	49199228	6.40222	0.546468	1.30913e-08	9.999e-05	3.37295e-06
Esophagus_Mucosa.portal.eqtl:rs12462324	19	49247086	ENSG00000176920.10	FUT2	49199228	6.40222	0.546468	1.30913e-08	9.999e-05	3.37295e-06
Esophagus_Mucosa.portal.eqtl:rs12611201	19	49248255	ENSG00000176920.10	FUT2	49199228	6.40222	0.546468	1.30913e-08	9.999e-05	3.37295e-06
Esophagus_Mucosa.portal.eqtl:rs12611203	19	49248295	ENSG00000176920.10	FUT2	49199228	6.40222	0.546468	1.30913e-08	9.999e-05	3.37295e-06
Esophagus_Mucosa.portal.eqtl:rs12611211	19	49248331	ENSG00000176920.10	FUT2	49199228	6.40222	0.546468	1.30913e-08	9.999e-05	3.37295e-06
Esophagus_Mucosa.portal.eqtl:rs12975033	19	49249443	ENSG00000176920.10	FUT2	49199228	6.40222	0.546468	1.30913e-08	9.999e-05	3.37295e-06
Esophagus_Mucosa.portal.eqtl:rs12982115	19	49248640	ENSG00000176920.10	FUT2	49199228	6.40222	0.546468	1.30913e-08	9.999e-05	3.37295e-06
Esophagus_Mucosa.portal.eqtl:rs28400015	19	49250633	ENSG00000176920.10	FUT2	49199228	6.40222	0.546468	1.30913e-08	9.999e-05	3.37295e-06
Esophagus_Mucosa.portal.eqtl:rs8108136	19	49247693	ENSG00000176920.10	FUT2	49199228	6.40222	0.546468	1.30913e-08	9.999e-05	3.37295e-06
Esophagus_Mucosa.portal.eqtl:rs8108468	19	49247786	ENSG00000176920.10	FUT2	49199228	6.40222	0.546468	1.30913e-08	9.999e-05	3.37295e-06
Esophagus_Mucosa.portal.eqtl:rs8111288	19	49247900	ENSG00000176920.10	FUT2	49199228	6.40222	0.546468	1.30913e-08	9.999e-05	3.37295e-06
Esophagus_Mucosa.portal.eqtl:rs8111399	19	49247963	ENSG00000176920.10	FUT2	49199228	6.40222	0.546468	1.30913e-08	9.999e-05	3.37295e-06
Lung.portal.eqtl:rs479486	19	49229323	ENSG00000182264.4	IZUMO1	49250166	6.15433	0.569503	1.49762e-08	9.999e-05	2.0959e-06
Esophagus_Mucosa.portal.eqtl:rs2307018	19	49244219	ENSG00000176920.10	FUT2	49199228	6.36312	0.543165	1.54218e-08	9.999e-05	3.37295e-06
Esophagus_Mucosa.portal.eqtl:rs2307019	19	49244220	ENSG00000176920.10	FUT2	49199228	6.36312	0.543165	1.54218e-08	9.999e-05	3.37295e-06
Esophagus_Mucosa.portal.eqtl:rs8102032	19	49249795	ENSG00000176920.10	FUT2	49199228	6.36312	0.543165	1.54218e-08	9.999e-05	3.37295e-06
Esophagus_Mucosa.portal.eqtl:rs8104897	19	49249814	ENSG00000176920.10	FUT2	49199228	6.36312	0.543165	1.54218e-08	9.999e-05	3.37295e-06
Esophagus_Mucosa.portal.eqtl:rs8105137	19	49249888	ENSG00000176920.10	FUT2	49199228	6.36312	0.543165	1.54218e-08	9.999e-05	3.37295e-06
Artery_Tibial.portal.eqtl:rs4672425	2	61444998	ENSG00000173209.17	AHSA2	61404553	6.14673	0.467774	1.55085e-08	9.999e-05	7.54981e-06
Adipose_Subcutaneous.portal.eqtl:rs2593633	2	61571513	ENSG00000173209.17	AHSA2	61404553	6.22164	0.469406	1.57e-08	9.999e-05	3.79073e-06
Adipose_Subcutaneous.portal.eqtl:rs2463102	2	61571295	ENSG00000173209.17	AHSA2	61404553	6.22055	0.469589	1.5776e-08	9.999e-05	3.79073e-06
Lung.portal.eqtl:rs281377	19	49206603	ENSG00000182264.4	IZUMO1	49250166	-6.14164	-0.533953	1.58754e-08	9.999e-05	2.0959e-06
Adipose_Subcutaneous.portal.eqtl:rs777591	2	61417617	ENSG00000173209.17	AHSA2	61404553	-6.20389	-0.470709	1.69869e-08	9.999e-05	3.79073e-06
Stomach.portal.eqtl:rs28400014	19	49250657	ENSG00000105538.4	RASIP1	49243978	-6.61265	-0.710399	1.75174e-08	9.999e-05	7.32518e-07
Adipose_Subcutaneous.portal.eqtl:rs778144	2	61583128	ENSG00000173209.17	AHSA2	61404553	6.19321	0.478504	1.78104e-08	9.999e-05	3.79073e-06
Adipose_Subcutaneous.portal.eqtl:rs778152	2	61608540	ENSG00000173209.17	AHSA2	61404553	6.1907	0.478692	1.80097e-08	9.999e-05	3.79073e-06
Adipose_Subcutaneous.portal.eqtl:rs12620105	2	61512321	ENSG00000173209.17	AHSA2	61404553	6.18844	0.481045	1.81909e-08	9.999e-05	3.79073e-06
Adipose_Subcutaneous.portal.eqtl:rs13004855	2	61505072	ENSG00000173209.17	AHSA2	61404553	6.18781	0.481005	1.82423e-08	9.999e-05	3.79073e-06
Adipose_Subcutaneous.portal.eqtl:rs6749226	2	61509783	ENSG00000173209.17	AHSA2	61404553	6.18778	0.481066	1.82442e-08	9.999e-05	3.79073e-06
Adipose_Subcutaneous.portal.eqtl:rs7602859	2	61458206	ENSG00000173209.17	AHSA2	61404553	6.18059	0.473014	1.88352e-08	9.999e-05	3.79073e-06
Stomach.portal.eqtl:rs12462324	19	49247086	ENSG00000105538.4	RASIP1	49243978	-6.5743	-0.688461	2.0212e-08	9.999e-05	7.32518e-07
Adipose_Subcutaneous.portal.eqtl:rs4672423	2	61435275	ENSG00000173209.17	AHSA2	61404553	6.16329	0.467748	2.03343e-08	9.999e-05	3.79073e-06
Adipose_Subcutaneous.portal.eqtl:rs11691734	2	61702466	ENSG00000173209.17	AHSA2	61404553	-6.16186	-0.474619	2.04635e-08	9.999e-05	3.79073e-06
Adipose_Subcutaneous.portal.eqtl:rs1867839	2	61694797	ENSG00000173209.17	AHSA2	61404553	-6.16184	-0.474671	2.04659e-08	9.999e-05	3.79073e-06
Stomach.portal.eqtl:rs12460295	19	49247124	ENSG00000105538.4	RASIP1	49243978	-6.56551	-0.687664	2.08858e-08	9.999e-05	7.32518e-07
Stomach.portal.eqtl:rs12978499	19	49237552	ENSG00000105538.4	RASIP1	49243978	-6.55145	-0.690334	2.20095e-08	9.999e-05	7.32518e-07
Stomach.portal.eqtl:rs281408	19	49233406	ENSG00000105538.4	RASIP1	49243978	-6.55082	-0.690262	2.20615e-08	9.999e-05	7.32518e-07
Stomach.portal.eqtl:rs412712	19	49234299	ENSG00000105538.4	RASIP1	49243978	-6.55082	-0.690262	2.20615e-08	9.999e-05	7.32518e-07
Esophagus_Mucosa.portal.eqtl:rs8111208	19	49248022	ENSG00000182264.4	IZUMO1	49250166	-6.26305	-0.733757	2.34295e-08	9.999e-05	1.9882e-06
Esophagus_Mucosa.portal.eqtl:rs11083948	19	49248120	ENSG00000182264.4	IZUMO1	49250166	-6.26248	-0.733484	2.34853e-08	9.999e-05	1.9882e-06
Esophagus_Mucosa.portal.eqtl:rs11672046	19	49247601	ENSG00000182264.4	IZUMO1	49250166	-6.26248	-0.733484	2.34853e-08	9.999e-05	1.9882e-06
Esophagus_Mucosa.portal.eqtl:rs12460295	19	49247124	ENSG00000182264.4	IZUMO1	49250166	-6.26248	-0.733484	2.34853e-08	9.999e-05	1.9882e-06
Esophagus_Mucosa.portal.eqtl:rs12462324	19	49247086	ENSG00000182264.4	IZUMO1	49250166	-6.26248	-0.733484	2.34853e-08	9.999e-05	1.9882e-06
Esophagus_Mucosa.portal.eqtl:rs12611201	19	49248255	ENSG00000182264.4	IZUMO1	49250166	-6.26248	-0.733484	2.34853e-08	9.999e-05	1.9882e-06
Esophagus_Mucosa.portal.eqtl:rs12611203	19	49248295	ENSG00000182264.4	IZUMO1	49250166	-6.26248	-0.733484	2.34853e-08	9.999e-05	1.9882e-06
Esophagus_Mucosa.portal.eqtl:rs12611211	19	49248331	ENSG00000182264.4	IZUMO1	49250166	-6.26248	-0.733484	2.34853e-08	9.999e-05	1.9882e-06
Esophagus_Mucosa.portal.eqtl:rs12975033	19	49249443	ENSG00000182264.4	IZUMO1	49250166	-6.26248	-0.733484	2.34853e-08	9.999e-05	1.9882e-06
Esophagus_Mucosa.portal.eqtl:rs12982115	19	49248640	ENSG00000182264.4	IZUMO1	49250166	-6.26248	-0.733484	2.34853e-08	9.999e-05	1.9882e-06
Esophagus_Mucosa.portal.eqtl:rs28400015	19	49250633	ENSG00000182264.4	IZUMO1	49250166	-6.26248	-0.733484	2.34853e-08	9.999e-05	1.9882e-06
Esophagus_Mucosa.portal.eqtl:rs8108136	19	49247693	ENSG00000182264.4	IZUMO1	49250166	-6.26248	-0.733484	2.34853e-08	9.999e-05	1.9882e-06
Esophagus_Mucosa.portal.eqtl:rs8108468	19	49247786	ENSG00000182264.4	IZUMO1	49250166	-6.26248	-0.733484	2.34853e-08	9.999e-05	1.9882e-06
Esophagus_Mucosa.portal.eqtl:rs8111288	19	49247900	ENSG00000182264.4	IZUMO1	49250166	-6.26248	-0.733484	2.34853e-08	9.999e-05	1.9882e-06
Esophagus_Mucosa.portal.eqtl:rs8111399	19	49247963	ENSG00000182264.4	IZUMO1	49250166	-6.26248	-0.733484	2.34853e-08	9.999e-05	1.9882e-06
Thyroid.portal.eqtl:rs3817588	2	27731212	ENSG00000115226.5	FNDC4	27718112	6.11966	0.60909	2.39569e-08	9.999e-05	7.65065e-06
Muscle_Skeletal.portal.eqtl:rs1838978	2	61540923	ENSG00000173209.17	AHSA2	61404553	5.95702	0.372067	2.58992e-08	9.999e-05	4.61373e-06
Adipose_Subcutaneous.portal.eqtl:rs1465042	2	61572322	ENSG00000173209.17	AHSA2	61404553	6.09369	0.472474	2.76537e-08	9.999e-05	3.79073e-06
Artery_Tibial.portal.eqtl:rs6749226	2	61509783	ENSG00000173209.17	AHSA2	61404553	6.00463	0.46967	2.97075e-08	9.999e-05	7.54981e-06
Artery_Tibial.portal.eqtl:rs12620105	2	61512321	ENSG00000173209.17	AHSA2	61404553	6.00381	0.469538	2.98187e-08	9.999e-05	7.54981e-06
Artery_Tibial.portal.eqtl:rs13004855	2	61505072	ENSG00000173209.17	AHSA2	61404553	6.00301	0.469483	2.99275e-08	9.999e-05	7.54981e-06
Stomach.portal.eqtl:rs11672046	19	49247601	ENSG00000105538.4	RASIP1	49243978	-6.4532	-0.677237	3.17417e-08	9.999e-05	7.32518e-07
Adipose_Subcutaneous.portal.eqtl:rs2694639	2	61595291	ENSG00000173209.17	AHSA2	61404553	6.04634	0.473419	3.40614e-08	9.999e-05	3.79073e-06
Adipose_Subcutaneous.portal.eqtl:rs2694643	2	61604383	ENSG00000173209.17	AHSA2	61404553	6.04634	0.473419	3.40614e-08	9.999e-05	3.79073e-06
Adipose_Subcutaneous.portal.eqtl:rs2694644	2	61604856	ENSG00000173209.17	AHSA2	61404553	6.04634	0.473419	3.40614e-08	9.999e-05	3.79073e-06
Adipose_Subcutaneous.portal.eqtl:rs4672436	2	61603357	ENSG00000173209.17	AHSA2	61404553	6.04634	0.473419	3.40614e-08	9.999e-05	3.79073e-06
Adipose_Subcutaneous.portal.eqtl:rs778143	2	61581890	ENSG00000173209.17	AHSA2	61404553	6.04634	0.473419	3.40614e-08	9.999e-05	3.79073e-06
Adipose_Subcutaneous.portal.eqtl:rs9677047	2	61585295	ENSG00000173209.17	AHSA2	61404553	6.04634	0.473419	3.40614e-08	9.999e-05	3.79073e-06
Stomach.portal.eqtl:rs8111208	19	49248022	ENSG00000105538.4	RASIP1	49243978	-6.4334	-0.675269	3.41712e-08	9.999e-05	7.32518e-07
Adipose_Subcutaneous.portal.eqtl:rs2177962	2	61588070	ENSG00000173209.17	AHSA2	61404553	6.04542	0.473319	3.4199e-08	9.999e-05	3.79073e-06
Adipose_Subcutaneous.portal.eqtl:rs2694651	2	61588642	ENSG00000173209.17	AHSA2	61404553	6.04542	0.473319	3.4199e-08	9.999e-05	3.79073e-06
Stomach.portal.eqtl:rs11083948	19	49248120	ENSG00000105538.4	RASIP1	49243978	-6.42835	-0.674871	3.48192e-08	9.999e-05	7.32518e-07
Stomach.portal.eqtl:rs12611201	19	49248255	ENSG00000105538.4	RASIP1	49243978	-6.42835	-0.674871	3.48192e-08	9.999e-05	7.32518e-07
Stomach.portal.eqtl:rs12611203	19	49248295	ENSG00000105538.4	RASIP1	49243978	-6.42835	-0.674871	3.48192e-08	9.999e-05	7.32518e-07
Stomach.portal.eqtl:rs12611211	19	49248331	ENSG00000105538.4	RASIP1	49243978	-6.42835	-0.674871	3.48192e-08	9.999e-05	7.32518e-07
Stomach.portal.eqtl:rs12982115	19	49248640	ENSG00000105538.4	RASIP1	49243978	-6.42835	-0.674871	3.48192e-08	9.999e-05	7.32518e-07
Stomach.portal.eqtl:rs8108136	19	49247693	ENSG00000105538.4	RASIP1	49243978	-6.42835	-0.674871	3.48192e-08	9.999e-05	7.32518e-07
Stomach.portal.eqtl:rs8108468	19	49247786	ENSG00000105538.4	RASIP1	49243978	-6.42835	-0.674871	3.48192e-08	9.999e-05	7.32518e-07
Stomach.portal.eqtl:rs8111399	19	49247963	ENSG00000105538.4	RASIP1	49243978	-6.42835	-0.674871	3.48192e-08	9.999e-05	7.32518e-07
Whole_Blood.portal.eqtl:rs778756	2	61781994	ENSG00000173209.17	AHSA2	61404553	-5.82574	-0.327727	3.49122e-08	9.999e-05	8.18579e-06
Esophagus_Mucosa.portal.eqtl:rs412712	19	49234299	ENSG00000182264.4	IZUMO1	49250166	-6.1644	-0.726382	3.53248e-08	9.999e-05	1.9882e-06
Whole_Blood.portal.eqtl:rs778755	2	61781037	ENSG00000173209.17	AHSA2	61404553	-5.8232	-0.330382	3.53452e-08	9.999e-05	8.18579e-06
Stomach.portal.eqtl:rs8111288	19	49247900	ENSG00000105538.4	RASIP1	49243978	-6.42048	-0.674909	3.58549e-08	9.999e-05	7.32518e-07
Thyroid.portal.eqtl:rs778148	2	61606866	ENSG00000173209.17	AHSA2	61404553	6.02392	0.466688	3.6565e-08	9.999e-05	7.55872e-06
Whole_Blood.portal.eqtl:rs3803253	13	99117149	ENSG00000152767.11	FARP1	98794816	5.81329	0.374107	3.70867e-08	9.999e-05	3.23607e-06
Whole_Blood.portal.eqtl:rs7339274	13	99120272	ENSG00000152767.11	FARP1	98794816	5.81329	0.374107	3.70867e-08	9.999e-05	3.23607e-06
Adipose_Subcutaneous.portal.eqtl:rs2694634	2	61551435	ENSG00000173209.17	AHSA2	61404553	6.02013	0.473972	3.82157e-08	9.999e-05	3.79073e-06
Adipose_Subcutaneous.portal.eqtl:rs7572603	2	61552145	ENSG00000173209.17	AHSA2	61404553	6.02005	0.473963	3.823e-08	9.999e-05	3.79073e-06
Adipose_Subcutaneous.portal.eqtl:rs778157	2	61554289	ENSG00000173209.17	AHSA2	61404553	6.01988	0.473944	3.82587e-08	9.999e-05	3.79073e-06
Adipose_Subcutaneous.portal.eqtl:rs778158	2	61555421	ENSG00000173209.17	AHSA2	61404553	6.01979	0.473935	3.82731e-08	9.999e-05	3.79073e-06
Adipose_Subcutaneous.portal.eqtl:rs10496092	2	61524679	ENSG00000173209.17	AHSA2	61404553	6.01281	0.469878	3.94636e-08	9.999e-05	3.79073e-06
Thyroid.portal.eqtl:rs13226650	7	73017005	ENSG00000009950.11	MLXIPL	73038873	5.99592	0.770291	4.13592e-08	9.999e-05	7.96634e-06
Artery_Tibial.portal.eqtl:rs7602859	2	61458206	ENSG00000173209.17	AHSA2	61404553	5.92205	0.457382	4.32116e-08	9.999e-05	7.54981e-06
Thyroid.portal.eqtl:rs13240065	7	73015369	ENSG00000009950.11	MLXIPL	73038873	5.97331	0.916183	4.56771e-08	9.999e-05	7.96634e-06
Thyroid.portal.eqtl:rs13234378	7	73026151	ENSG00000009950.11	MLXIPL	73038873	5.97307	0.916154	4.57259e-08	9.999e-05	7.96634e-06
Thyroid.portal.eqtl:rs13235543	7	73013901	ENSG00000009950.11	MLXIPL	73038873	5.97307	0.916154	4.57259e-08	9.999e-05	7.96634e-06
Thyroid.portal.eqtl:rs13246993	7	73022746	ENSG00000009950.11	MLXIPL	73038873	5.97307	0.916154	4.57259e-08	9.999e-05	7.96634e-06
Thyroid.portal.eqtl:rs35332062	7	73012042	ENSG00000009950.11	MLXIPL	73038873	5.97307	0.916154	4.57259e-08	9.999e-05	7.96634e-06
Thyroid.portal.eqtl:rs3812316	7	73020337	ENSG00000009950.11	MLXIPL	73038873	5.97307	0.916154	4.57259e-08	9.999e-05	7.96634e-06
Thyroid.portal.eqtl:rs79624003	7	73012785	ENSG00000009950.11	MLXIPL	73038873	5.97307	0.916154	4.57259e-08	9.999e-05	7.96634e-06
Thyroid.portal.eqtl:rs13234131	7	73025975	ENSG00000009950.11	MLXIPL	73038873	5.97105	0.916337	4.61331e-08	9.999e-05	7.96634e-06
Stomach.portal.eqtl:rs11667321	19	49250538	ENSG00000105538.4	RASIP1	49243978	-6.34499	-0.69447	4.74812e-08	9.999e-05	7.32518e-07
Stomach.portal.eqtl:rs8106205	19	49250197	ENSG00000105538.4	RASIP1	49243978	-6.34499	-0.69447	4.74812e-08	9.999e-05	7.32518e-07
Lung.portal.eqtl:rs485073	19	49207255	ENSG00000176920.10	FUT2	49199228	-5.87977	-0.444129	5.23051e-08	0.00019998	2.4481e-06
Lung.portal.eqtl:rs485186	19	49207206	ENSG00000176920.10	FUT2	49199228	-5.87977	-0.444129	5.23051e-08	0.00019998	2.4481e-06
Lung.portal.eqtl:rs603985	19	49207257	ENSG00000176920.10	FUT2	49199228	-5.87977	-0.444129	5.23051e-08	0.00019998	2.4481e-06
Stomach.portal.eqtl:rs12975033	19	49249443	ENSG00000105538.4	RASIP1	49243978	-6.30896	-0.683183	5.42865e-08	9.999e-05	7.32518e-07
Adipose_Subcutaneous.portal.eqtl:rs13023037	2	61620989	ENSG00000173209.17	AHSA2	61404553	5.93732	0.467401	5.49103e-08	9.999e-05	3.79073e-06
Adipose_Subcutaneous.portal.eqtl:rs7560978	2	61619588	ENSG00000173209.17	AHSA2	61404553	5.92584	0.46492	5.77317e-08	9.999e-05	3.79073e-06
Adipose_Subcutaneous.portal.eqtl:rs4672445	2	61655008	ENSG00000173209.17	AHSA2	61404553	5.9252	0.464769	5.78909e-08	9.999e-05	3.79073e-06
Adipose_Subcutaneous.portal.eqtl:rs10190332	2	61619267	ENSG00000173209.17	AHSA2	61404553	5.92496	0.464742	5.79523e-08	9.999e-05	3.79073e-06
Adipose_Subcutaneous.portal.eqtl:rs1900572	2	61650715	ENSG00000173209.17	AHSA2	61404553	5.92496	0.464742	5.79523e-08	9.999e-05	3.79073e-06
Adipose_Subcutaneous.portal.eqtl:rs2264100	2	61670829	ENSG00000173209.17	AHSA2	61404553	-5.92496	-0.464742	5.79523e-08	9.999e-05	3.79073e-06
Adipose_Subcutaneous.portal.eqtl:rs2593627	2	61618574	ENSG00000173209.17	AHSA2	61404553	5.92496	0.464742	5.79523e-08	9.999e-05	3.79073e-06
Adipose_Subcutaneous.portal.eqtl:rs6545867	2	61651027	ENSG00000173209.17	AHSA2	61404553	5.92496	0.464742	5.79523e-08	9.999e-05	3.79073e-06
Adipose_Subcutaneous.portal.eqtl:rs2593625	2	61668769	ENSG00000173209.17	AHSA2	61404553	-5.92475	-0.465005	5.80067e-08	9.999e-05	3.79073e-06
Adipose_Subcutaneous.portal.eqtl:rs6545871	2	61692203	ENSG00000173209.17	AHSA2	61404553	-5.92398	-0.464633	5.82002e-08	9.999e-05	3.79073e-06
Artery_Tibial.portal.eqtl:rs2600661	2	61543081	ENSG00000173209.17	AHSA2	61404553	5.84685	0.465122	6.06656e-08	9.999e-05	7.54981e-06
Whole_Blood.portal.eqtl:rs4584	13	99101869	ENSG00000152767.11	FARP1	98794816	5.70733	0.371461	6.18438e-08	9.999e-05	3.23607e-06
Stomach.portal.eqtl:rs12979144	19	49237547	ENSG00000105538.4	RASIP1	49243978	-6.25846	-0.684404	6.54891e-08	9.999e-05	7.32518e-07
Adipose_Subcutaneous.portal.eqtl:rs12612677	2	61729695	ENSG00000173209.17	AHSA2	61404553	-5.89643	-0.477125	6.56244e-08	9.999e-05	3.79073e-06
Whole_Blood.portal.eqtl:rs9630321	13	99106979	ENSG00000152767.11	FARP1	98794816	5.68986	0.370189	6.72497e-08	9.999e-05	3.23607e-06
Adipose_Subcutaneous.portal.eqtl:rs1971183	2	61716924	ENSG00000173209.17	AHSA2	61404553	-5.89045	-0.451868	6.73555e-08	9.999e-05	3.79073e-06
Whole_Blood.portal.eqtl:rs34799293	15	75258773	ENSG00000140497.12	SCAMP2	75165706	5.68749	0.197786	6.8018e-08	0.00029997	2.17485e-06
Whole_Blood.portal.eqtl:rs12463	13	99105302	ENSG00000152767.11	FARP1	98794816	5.68738	0.36971	6.80515e-08	9.999e-05	3.23607e-06
Whole_Blood.portal.eqtl:rs3742136	13	99102607	ENSG00000152767.11	FARP1	98794816	5.68738	0.36971	6.80515e-08	9.999e-05	3.23607e-06
Whole_Blood.portal.eqtl:rs3742137	13	99102449	ENSG00000152767.11	FARP1	98794816	5.68738	0.36971	6.80515e-08	9.999e-05	3.23607e-06
Whole_Blood.portal.eqtl:rs8481	13	99105395	ENSG00000152767.11	FARP1	98794816	5.68738	0.36971	6.80515e-08	9.999e-05	3.23607e-06
Whole_Blood.portal.eqtl:rs9168	13	99101583	ENSG00000152767.11	FARP1	98794816	5.68738	0.36971	6.80515e-08	9.999e-05	3.23607e-06
Artery_Tibial.portal.eqtl:rs2694644	2	61604856	ENSG00000173209.17	AHSA2	61404553	5.81984	0.457735	6.84963e-08	9.999e-05	7.54981e-06
Lung.portal.eqtl:rs2251034	19	49207792	ENSG00000176920.10	FUT2	49199228	-5.81965	-0.438031	6.85521e-08	0.00019998	2.4481e-06
Lung.portal.eqtl:rs633372	19	49209226	ENSG00000176920.10	FUT2	49199228	-5.81965	-0.438031	6.85521e-08	0.00019998	2.4481e-06
Artery_Tibial.portal.eqtl:rs2694639	2	61595291	ENSG00000173209.17	AHSA2	61404553	5.81951	0.457732	6.85971e-08	9.999e-05	7.54981e-06
Artery_Tibial.portal.eqtl:rs2694643	2	61604383	ENSG00000173209.17	AHSA2	61404553	5.81951	0.457732	6.85971e-08	9.999e-05	7.54981e-06
Artery_Tibial.portal.eqtl:rs4672436	2	61603357	ENSG00000173209.17	AHSA2	61404553	5.81951	0.457732	6.85971e-08	9.999e-05	7.54981e-06
Artery_Tibial.portal.eqtl:rs778143	2	61581890	ENSG00000173209.17	AHSA2	61404553	5.81951	0.457732	6.85971e-08	9.999e-05	7.54981e-06
Artery_Tibial.portal.eqtl:rs9677047	2	61585295	ENSG00000173209.17	AHSA2	61404553	5.81951	0.457732	6.85971e-08	9.999e-05	7.54981e-06
Artery_Tibial.portal.eqtl:rs2177962	2	61588070	ENSG00000173209.17	AHSA2	61404553	5.81742	0.457573	6.92426e-08	9.999e-05	7.54981e-06
Artery_Tibial.portal.eqtl:rs2694651	2	61588642	ENSG00000173209.17	AHSA2	61404553	5.81742	0.457573	6.92426e-08	9.999e-05	7.54981e-06
Artery_Tibial.portal.eqtl:rs2694642	2	61596180	ENSG00000173209.17	AHSA2	61404553	5.81703	0.458648	6.93641e-08	9.999e-05	7.54981e-06
Stomach.portal.eqtl:rs28400015	19	49250633	ENSG00000105538.4	RASIP1	49243978	-6.23913	-0.681853	7.0361e-08	9.999e-05	7.32518e-07
Stomach.portal.eqtl:rs8102032	19	49249795	ENSG00000105538.4	RASIP1	49243978	-6.23913	-0.681853	7.0361e-08	9.999e-05	7.32518e-07
Stomach.portal.eqtl:rs8104897	19	49249814	ENSG00000105538.4	RASIP1	49243978	-6.23913	-0.681853	7.0361e-08	9.999e-05	7.32518e-07
Stomach.portal.eqtl:rs8105137	19	49249888	ENSG00000105538.4	RASIP1	49243978	-6.23913	-0.681853	7.0361e-08	9.999e-05	7.32518e-07
Thyroid.portal.eqtl:rs12615783	2	61440947	ENSG00000173209.17	AHSA2	61404553	5.87447	0.452581	7.03901e-08	9.999e-05	7.55872e-06
Artery_Tibial.portal.eqtl:rs2593633	2	61571513	ENSG00000173209.17	AHSA2	61404553	5.80577	0.44921	7.2957e-08	9.999e-05	7.54981e-06
Whole_Blood.portal.eqtl:rs3783005	13	99111337	ENSG00000152767.11	FARP1	98794816	5.67048	0.370765	7.37882e-08	9.999e-05	3.23607e-06
Whole_Blood.portal.eqtl:rs9517310	13	99100474	ENSG00000152767.11	FARP1	98794816	5.66933	0.352809	7.4195e-08	9.999e-05	3.23607e-06
Whole_Blood.portal.eqtl:rs2031239	13	99111560	ENSG00000152767.11	FARP1	98794816	5.66907	0.371046	7.42841e-08	9.999e-05	3.23607e-06
Artery_Tibial.portal.eqtl:rs2463102	2	61571295	ENSG00000173209.17	AHSA2	61404553	5.80108	0.449143	7.45097e-08	9.999e-05	7.54981e-06
Whole_Blood.portal.eqtl:rs11638576	15	75260387	ENSG00000140497.12	SCAMP2	75165706	5.66405	0.217997	7.60888e-08	0.00029997	2.17485e-06
Whole_Blood.portal.eqtl:rs7988959	13	99104004	ENSG00000231194.1	FARP1-AS1	99088094	5.66127	0.427044	7.71077e-08	0.00029997	4.61695e-06
Thyroid.portal.eqtl:rs2694639	2	61595291	ENSG00000173209.17	AHSA2	61404553	5.84814	0.455598	7.89467e-08	9.999e-05	7.55872e-06
Thyroid.portal.eqtl:rs2694643	2	61604383	ENSG00000173209.17	AHSA2	61404553	5.84814	0.455598	7.89467e-08	9.999e-05	7.55872e-06
Thyroid.portal.eqtl:rs2694644	2	61604856	ENSG00000173209.17	AHSA2	61404553	5.84814	0.455598	7.89467e-08	9.999e-05	7.55872e-06
Thyroid.portal.eqtl:rs4672436	2	61603357	ENSG00000173209.17	AHSA2	61404553	5.84814	0.455598	7.89467e-08	9.999e-05	7.55872e-06
Thyroid.portal.eqtl:rs778143	2	61581890	ENSG00000173209.17	AHSA2	61404553	5.84814	0.455598	7.89467e-08	9.999e-05	7.55872e-06
Thyroid.portal.eqtl:rs9677047	2	61585295	ENSG00000173209.17	AHSA2	61404553	5.84814	0.455598	7.89467e-08	9.999e-05	7.55872e-06
Adipose_Subcutaneous.portal.eqtl:rs2600661	2	61543081	ENSG00000173209.17	AHSA2	61404553	5.85315	0.468077	7.92094e-08	9.999e-05	3.79073e-06
Thyroid.portal.eqtl:rs2177962	2	61588070	ENSG00000173209.17	AHSA2	61404553	5.84711	0.455515	7.93009e-08	9.999e-05	7.55872e-06
Thyroid.portal.eqtl:rs2694651	2	61588642	ENSG00000173209.17	AHSA2	61404553	5.84711	0.455515	7.93009e-08	9.999e-05	7.55872e-06
Thyroid.portal.eqtl:rs33951980	7	73029437	ENSG00000009950.11	MLXIPL	73038873	5.8464	0.884437	7.95454e-08	9.999e-05	7.96634e-06
Adipose_Subcutaneous.portal.eqtl:rs2694642	2	61596180	ENSG00000173209.17	AHSA2	61404553	5.85035	0.462692	8.01774e-08	9.999e-05	3.79073e-06
Lung.portal.eqtl:rs602662	19	49206985	ENSG00000176920.10	FUT2	49199228	-5.77725	-0.440293	8.29011e-08	0.00019998	2.4481e-06
Lung.portal.eqtl:rs1704773	19	49209566	ENSG00000176920.10	FUT2	49199228	-5.77696	-0.43661	8.30079e-08	0.00019998	2.4481e-06
Thyroid.portal.eqtl:rs34062580	7	73033559	ENSG00000009950.11	MLXIPL	73038873	5.83617	0.882837	8.31653e-08	9.999e-05	7.96634e-06
Muscle_Skeletal.portal.eqtl:rs2694642	2	61596180	ENSG00000173209.17	AHSA2	61404553	5.69553	0.354618	8.79339e-08	9.999e-05	4.61373e-06
Whole_Blood.portal.eqtl:rs7988959	13	99104004	ENSG00000152767.11	FARP1	98794816	5.63062	0.36775	8.92476e-08	9.999e-05	3.23607e-06
Thyroid.portal.eqtl:rs2694642	2	61596180	ENSG00000173209.17	AHSA2	61404553	5.81942	0.447176	8.94477e-08	9.999e-05	7.55872e-06
Thyroid.portal.eqtl:rs71556736	7	73034929	ENSG00000009950.11	MLXIPL	73038873	5.81747	0.881545	9.02097e-08	9.999e-05	7.96634e-06
Lung.portal.eqtl:rs2548459	19	49209339	ENSG00000176920.10	FUT2	49199228	-5.75482	-0.438927	9.16419e-08	0.00019998	2.4481e-06
Whole_Blood.portal.eqtl:rs6491427	13	99113166	ENSG00000231194.1	FARP1-AS1	99088094	5.61856	0.426209	9.45182e-08	0.00029997	4.61695e-06
Adipose_Subcutaneous.portal.eqtl:rs3821222	2	61713526	ENSG00000173209.17	AHSA2	61404553	-5.81034	-0.458721	9.53626e-08	9.999e-05	3.79073e-06
Adipose_Subcutaneous.portal.eqtl:rs6705235	2	61713580	ENSG00000173209.17	AHSA2	61404553	-5.80914	-0.458673	9.5857e-08	9.999e-05	3.79073e-06
Artery_Tibial.portal.eqtl:rs777590	2	61417145	ENSG00000173209.17	AHSA2	61404553	-5.73994	-0.441636	9.79377e-08	9.999e-05	7.54981e-06
Adipose_Subcutaneous.portal.eqtl:rs1186710	2	61688727	ENSG00000173209.17	AHSA2	61404553	-5.80136	-0.448804	9.91406e-08	9.999e-05	3.79073e-06
Adipose_Subcutaneous.portal.eqtl:rs2252662	2	61670731	ENSG00000173209.17	AHSA2	61404553	-5.79353	-0.447671	1.02555e-07	9.999e-05	3.79073e-06
Adipose_Subcutaneous.portal.eqtl:rs2256617	2	61679924	ENSG00000173209.17	AHSA2	61404553	-5.79353	-0.447668	1.02556e-07	9.999e-05	3.79073e-06
Adipose_Subcutaneous.portal.eqtl:rs2694635	2	61676940	ENSG00000173209.17	AHSA2	61404553	-5.79353	-0.447668	1.02556e-07	9.999e-05	3.79073e-06
Adipose_Subcutaneous.portal.eqtl:rs12713436	2	61691260	ENSG00000173209.17	AHSA2	61404553	-5.79353	-0.447695	1.02556e-07	9.999e-05	3.79073e-06
Adipose_Subcutaneous.portal.eqtl:rs7588814	2	61695589	ENSG00000173209.17	AHSA2	61404553	-5.79352	-0.447661	1.02558e-07	9.999e-05	3.79073e-06
Lung.portal.eqtl:rs507855	19	49208501	ENSG00000176920.10	FUT2	49199228	-5.72195	-0.440371	1.06115e-07	0.00019998	2.4481e-06
Thyroid.portal.eqtl:rs13229619	7	73030175	ENSG00000009950.11	MLXIPL	73038873	5.77903	0.875931	1.06577e-07	9.999e-05	7.96634e-06
Thyroid.portal.eqtl:rs6749226	2	61509783	ENSG00000173209.17	AHSA2	61404553	5.77793	0.450011	1.07089e-07	9.999e-05	7.55872e-06
Thyroid.portal.eqtl:rs12620105	2	61512321	ENSG00000173209.17	AHSA2	61404553	5.77572	0.4498	1.08116e-07	9.999e-05	7.55872e-06
Thyroid.portal.eqtl:rs13004855	2	61505072	ENSG00000173209.17	AHSA2	61404553	5.77503	0.449747	1.08439e-07	9.999e-05	7.55872e-06
Esophagus_Mucosa.portal.eqtl:rs2081194	19	49263477	ENSG00000176920.10	FUT2	49199228	5.89176	0.561832	1.08832e-07	9.999e-05	3.37295e-06
Whole_Blood.portal.eqtl:rs35882241	15	75260773	ENSG00000140497.12	SCAMP2	75165706	5.58765	0.198457	1.09461e-07	0.00029997	2.17485e-06
Thyroid.portal.eqtl:rs2548459	19	49209339	ENSG00000142233.7	NTN5	49176338	5.77219	0.349961	1.09783e-07	0.00039996	2.67583e-06
Lung.portal.eqtl:rs632111	19	49208978	ENSG00000176920.10	FUT2	49199228	-5.71364	-0.433679	1.10118e-07	0.00019998	2.4481e-06
Whole_Blood.portal.eqtl:rs4886413	15	75262310	ENSG00000140497.12	SCAMP2	75165706	5.58509	0.198367	1.10798e-07	0.00029997	2.17485e-06
Adipose_Subcutaneous.portal.eqtl:rs1186711	2	61688505	ENSG00000173209.17	AHSA2	61404553	-5.77559	-0.458742	1.10819e-07	9.999e-05	3.79073e-06
Esophagus_Mucosa.portal.eqtl:rs56066508	19	49241400	ENSG00000182264.4	IZUMO1	49250166	-5.88688	-0.704264	1.11034e-07	9.999e-05	1.9882e-06
Esophagus_Mucosa.portal.eqtl:rs12981072	19	49241006	ENSG00000182264.4	IZUMO1	49250166	-5.88661	-0.704252	1.11156e-07	9.999e-05	1.9882e-06
Adipose_Subcutaneous.portal.eqtl:rs778155	2	61647901	ENSG00000173209.17	AHSA2	61404553	5.77159	0.458284	1.12749e-07	9.999e-05	3.79073e-06
Adipose_Subcutaneous.portal.eqtl:rs4430924	2	61703856	ENSG00000173209.17	AHSA2	61404553	-5.77159	-0.458284	1.12749e-07	9.999e-05	3.79073e-06
Adipose_Subcutaneous.portal.eqtl:rs778154	2	61646631	ENSG00000173209.17	AHSA2	61404553	5.77152	0.45828	1.12782e-07	9.999e-05	3.79073e-06
Adipose_Subcutaneous.portal.eqtl:rs778140	2	61682976	ENSG00000173209.17	AHSA2	61404553	-5.77152	-0.458324	1.12784e-07	9.999e-05	3.79073e-06
Esophagus_Mucosa.portal.eqtl:rs281408	19	49233406	ENSG00000182264.4	IZUMO1	49250166	-5.88305	-0.703113	1.12791e-07	9.999e-05	1.9882e-06
Adipose_Subcutaneous.portal.eqtl:rs2463100	2	61659199	ENSG00000173209.17	AHSA2	61404553	5.77145	0.458263	1.12819e-07	9.999e-05	3.79073e-06
Esophagus_Mucosa.portal.eqtl:rs12978499	19	49237552	ENSG00000182264.4	IZUMO1	49250166	-5.88278	-0.703072	1.12914e-07	9.999e-05	1.9882e-06
Esophagus_Mucosa.portal.eqtl:rs12979144	19	49237547	ENSG00000182264.4	IZUMO1	49250166	-5.88278	-0.703072	1.12914e-07	9.999e-05	1.9882e-06
Adipose_Subcutaneous.portal.eqtl:rs2442029	2	61679552	ENSG00000173209.17	AHSA2	61404553	-5.77122	-0.458261	1.12929e-07	9.999e-05	3.79073e-06
Adipose_Subcutaneous.portal.eqtl:rs2256615	2	61679894	ENSG00000173209.17	AHSA2	61404553	-5.77116	-0.458219	1.12961e-07	9.999e-05	3.79073e-06
Adipose_Subcutaneous.portal.eqtl:rs796597	2	61681060	ENSG00000173209.17	AHSA2	61404553	-5.77116	-0.458219	1.12961e-07	9.999e-05	3.79073e-06
Adipose_Subcutaneous.portal.eqtl:rs1186697	2	61661417	ENSG00000173209.17	AHSA2	61404553	-5.77111	-0.458211	1.12985e-07	9.999e-05	3.79073e-06
Adipose_Subcutaneous.portal.eqtl:rs2121660	2	61653058	ENSG00000173209.17	AHSA2	61404553	5.77095	0.458282	1.13064e-07	9.999e-05	3.79073e-06
Adipose_Subcutaneous.portal.eqtl:rs778141	2	61682178	ENSG00000173209.17	AHSA2	61404553	-5.77076	-0.458159	1.13154e-07	9.999e-05	3.79073e-06
Adipose_Subcutaneous.portal.eqtl:rs2694625	2	61616055	ENSG00000173209.17	AHSA2	61404553	5.76895	0.458251	1.14044e-07	9.999e-05	3.79073e-06
Whole_Blood.portal.eqtl:rs35556055	15	75253414	ENSG00000140497.12	SCAMP2	75165706	5.57893	0.198149	1.14081e-07	0.00029997	2.17485e-06
Whole_Blood.portal.eqtl:rs62029217	15	75261899	ENSG00000140497.12	SCAMP2	75165706	5.57893	0.198149	1.14081e-07	0.00029997	2.17485e-06
Adipose_Subcutaneous.portal.eqtl:rs2950268	2	61615763	ENSG00000173209.17	AHSA2	61404553	5.76861	0.458246	1.1421e-07	9.999e-05	3.79073e-06
Adipose_Subcutaneous.portal.eqtl:rs2442034	2	61615667	ENSG00000173209.17	AHSA2	61404553	5.76856	0.458287	1.14233e-07	9.999e-05	3.79073e-06
Adipose_Subcutaneous.portal.eqtl:rs778142	2	61681428	ENSG00000173209.17	AHSA2	61404553	-5.76743	-0.458379	1.14795e-07	9.999e-05	3.79073e-06
Adipose_Subcutaneous.portal.eqtl:rs2442031	2	61613785	ENSG00000173209.17	AHSA2	61404553	5.76599	0.458204	1.1551e-07	9.999e-05	3.79073e-06
Whole_Blood.portal.eqtl:rs745638	13	99119307	ENSG00000231194.1	FARP1-AS1	99088094	5.57463	0.4185	1.16423e-07	0.00029997	4.61695e-06
Whole_Blood.portal.eqtl:rs3803253	13	99117149	ENSG00000231194.1	FARP1-AS1	99088094	5.5704	0.417648	1.18779e-07	0.00029997	4.61695e-06
Whole_Blood.portal.eqtl:rs7339274	13	99120272	ENSG00000231194.1	FARP1-AS1	99088094	5.5704	0.417648	1.18779e-07	0.00029997	4.61695e-06
Thyroid.portal.eqtl:rs2251034	19	49207792	ENSG00000142233.7	NTN5	49176338	5.74274	0.353706	1.24699e-07	0.00039996	2.67583e-06
Thyroid.portal.eqtl:rs485073	19	49207255	ENSG00000142233.7	NTN5	49176338	5.74274	0.353706	1.24699e-07	0.00039996	2.67583e-06
Thyroid.portal.eqtl:rs485186	19	49207206	ENSG00000142233.7	NTN5	49176338	5.74274	0.353706	1.24699e-07	0.00039996	2.67583e-06
Thyroid.portal.eqtl:rs603985	19	49207257	ENSG00000142233.7	NTN5	49176338	5.74274	0.353706	1.24699e-07	0.00039996	2.67583e-06
Thyroid.portal.eqtl:rs633372	19	49209226	ENSG00000142233.7	NTN5	49176338	5.74274	0.353706	1.24699e-07	0.00039996	2.67583e-06
Artery_Tibial.portal.eqtl:rs12997538	2	61564249	ENSG00000173209.17	AHSA2	61404553	5.68352	0.45945	1.25895e-07	9.999e-05	7.54981e-06
Whole_Blood.portal.eqtl:rs2031239	13	99111560	ENSG00000231194.1	FARP1-AS1	99088094	5.55528	0.42186	1.27584e-07	0.00029997	4.61695e-06
Adipose_Subcutaneous.portal.eqtl:rs13003376	2	61691440	ENSG00000173209.17	AHSA2	61404553	-5.74271	-0.455227	1.27704e-07	9.999e-05	3.79073e-06
Adipose_Subcutaneous.portal.eqtl:rs1880866	2	61698972	ENSG00000173209.17	AHSA2	61404553	-5.74245	-0.44294	1.27847e-07	9.999e-05	3.79073e-06
Artery_Tibial.portal.eqtl:rs4671399	2	61458518	ENSG00000173209.17	AHSA2	61404553	5.67835	0.440084	1.28821e-07	9.999e-05	7.54981e-06
Artery_Tibial.portal.eqtl:rs4672426	2	61457148	ENSG00000173209.17	AHSA2	61404553	5.67835	0.440084	1.28821e-07	9.999e-05	7.54981e-06
Artery_Tibial.portal.eqtl:rs6545848	2	61461183	ENSG00000173209.17	AHSA2	61404553	5.67835	0.440084	1.28821e-07	9.999e-05	7.54981e-06
Artery_Tibial.portal.eqtl:rs6739427	2	61452879	ENSG00000173209.17	AHSA2	61404553	5.67835	0.440084	1.28821e-07	9.999e-05	7.54981e-06
Artery_Tibial.portal.eqtl:rs777589	2	61425621	ENSG00000173209.17	AHSA2	61404553	-5.67835	-0.440084	1.28821e-07	9.999e-05	7.54981e-06
Artery_Tibial.portal.eqtl:rs6545845	2	61437044	ENSG00000173209.17	AHSA2	61404553	5.678	0.440069	1.29019e-07	9.999e-05	7.54981e-06
Whole_Blood.portal.eqtl:rs3783005	13	99111337	ENSG00000231194.1	FARP1-AS1	99088094	5.55031	0.421144	1.30615e-07	0.00029997	4.61695e-06
Thyroid.portal.eqtl:rs6709441	2	61436930	ENSG00000173209.17	AHSA2	61404553	5.72867	0.441451	1.32512e-07	9.999e-05	7.55872e-06
Artery_Tibial.portal.eqtl:rs4672423	2	61435275	ENSG00000173209.17	AHSA2	61404553	5.67136	0.439793	1.32876e-07	9.999e-05	7.54981e-06
Whole_Blood.portal.eqtl:rs745638	13	99119307	ENSG00000152767.11	FARP1	98794816	5.53469	0.359859	1.40605e-07	9.999e-05	3.23607e-06
Artery_Tibial.portal.eqtl:rs777591	2	61417617	ENSG00000173209.17	AHSA2	61404553	-5.65014	-0.432318	1.45979e-07	9.999e-05	7.54981e-06
Lung.portal.eqtl:rs519757	19	49224966	ENSG00000182264.4	IZUMO1	49250166	5.64195	0.545931	1.51375e-07	9.999e-05	2.0959e-06
Adipose_Subcutaneous.portal.eqtl:rs2694636	2	61677137	ENSG00000173209.17	AHSA2	61404553	-5.70273	-0.451453	1.51667e-07	9.999e-05	3.79073e-06
Whole_Blood.portal.eqtl:rs9517310	13	99100474	ENSG00000231194.1	FARP1-AS1	99088094	5.51671	0.398809	1.53025e-07	0.00029997	4.61695e-06
Esophagus_Mucosa.portal.eqtl:rs12975781	19	49249698	ENSG00000176920.10	FUT2	49199228	5.80024	0.512447	1.58237e-07	9.999e-05	3.37295e-06
Esophagus_Mucosa.portal.eqtl:rs12975781	19	49249698	ENSG00000105538.4	RASIP1	49243978	-5.7886	-0.580046	1.65934e-07	0.00049995	2.09513e-06
Whole_Blood.portal.eqtl:rs12148513	15	75222225	ENSG00000140497.12	SCAMP2	75165706	5.49675	0.205094	1.68075e-07	0.00029997	2.17485e-06
Thyroid.portal.eqtl:rs777593	2	61419103	ENSG00000173209.17	AHSA2	61404553	-5.67203	-0.436727	1.69125e-07	9.999e-05	7.55872e-06
Artery_Tibial.portal.eqtl:rs2177961	2	61560264	ENSG00000173209.17	AHSA2	61404553	5.61214	0.446549	1.7269e-07	9.999e-05	7.54981e-06
Skin_Sun_Exposed_Lower_leg.portal.eqtl:rs55747707	7	73037366	ENSG00000009950.11	MLXIPL	73038873	5.65341	0.704902	1.75345e-07	0.00049995	5.39652e-06
Lung.portal.eqtl:rs570794	19	49207651	ENSG00000176920.10	FUT2	49199228	-5.6068	-0.430735	1.76808e-07	0.00019998	2.4481e-06
Lung.portal.eqtl:rs571689	19	49207554	ENSG00000176920.10	FUT2	49199228	-5.60079	-0.432269	1.81563e-07	0.00019998	2.4481e-06
Lung.portal.eqtl:rs3859439	19	49224389	ENSG00000182264.4	IZUMO1	49250166	5.59924	0.542152	1.82808e-07	9.999e-05	2.0959e-06
Thyroid.portal.eqtl:rs1704773	19	49209566	ENSG00000142233.7	NTN5	49176338	5.65285	0.347903	1.8365e-07	0.00039996	2.67583e-06
Lung.portal.eqtl:rs507766	19	49208543	ENSG00000176920.10	FUT2	49199228	-5.59243	-0.429077	1.88377e-07	0.00019998	2.4481e-06
Lung.portal.eqtl:rs503279	19	49209010	ENSG00000176920.10	FUT2	49199228	-5.59112	-0.428994	1.8947e-07	0.00019998	2.4481e-06
Lung.portal.eqtl:rs504963	19	49208865	ENSG00000176920.10	FUT2	49199228	-5.59112	-0.428994	1.8947e-07	0.00019998	2.4481e-06
Lung.portal.eqtl:rs506897	19	49208629	ENSG00000176920.10	FUT2	49199228	-5.59112	-0.428994	1.8947e-07	0.00019998	2.4481e-06
Lung.portal.eqtl:rs507711	19	49208564	ENSG00000176920.10	FUT2	49199228	-5.59112	-0.428994	1.8947e-07	0.00019998	2.4481e-06
Lung.portal.eqtl:rs569970	19	49207718	ENSG00000176920.10	FUT2	49199228	-5.59112	-0.428994	1.8947e-07	0.00019998	2.4481e-06
Skin_Sun_Exposed_Lower_leg.portal.eqtl:rs35493868	7	73039406	ENSG00000009950.11	MLXIPL	73038873	5.63238	0.700654	1.91993e-07	0.00049995	5.39652e-06
Thyroid.portal.eqtl:rs2442031	2	61613785	ENSG00000173209.17	AHSA2	61404553	5.6414	0.440307	1.92898e-07	9.999e-05	7.55872e-06
Thyroid.portal.eqtl:rs2442034	2	61615667	ENSG00000173209.17	AHSA2	61404553	5.64037	0.440302	1.93755e-07	9.999e-05	7.55872e-06
Thyroid.portal.eqtl:rs2950268	2	61615763	ENSG00000173209.17	AHSA2	61404553	5.64032	0.440302	1.93795e-07	9.999e-05	7.55872e-06
Thyroid.portal.eqtl:rs2694625	2	61616055	ENSG00000173209.17	AHSA2	61404553	5.64018	0.440301	1.93917e-07	9.999e-05	7.55872e-06
Muscle_Skeletal.portal.eqtl:rs2694639	2	61595291	ENSG00000173209.17	AHSA2	61404553	5.52217	0.344445	1.94639e-07	9.999e-05	4.61373e-06
Muscle_Skeletal.portal.eqtl:rs2694643	2	61604383	ENSG00000173209.17	AHSA2	61404553	5.52217	0.344445	1.94639e-07	9.999e-05	4.61373e-06
Muscle_Skeletal.portal.eqtl:rs4672436	2	61603357	ENSG00000173209.17	AHSA2	61404553	5.52217	0.344445	1.94639e-07	9.999e-05	4.61373e-06
Muscle_Skeletal.portal.eqtl:rs778143	2	61581890	ENSG00000173209.17	AHSA2	61404553	5.52217	0.344445	1.94639e-07	9.999e-05	4.61373e-06
Muscle_Skeletal.portal.eqtl:rs9677047	2	61585295	ENSG00000173209.17	AHSA2	61404553	5.52217	0.344445	1.94639e-07	9.999e-05	4.61373e-06
Lung.portal.eqtl:rs692854	19	49209464	ENSG00000176920.10	FUT2	49199228	-5.58473	-0.42908	1.94872e-07	0.00019998	2.4481e-06
Thyroid.portal.eqtl:rs778154	2	61646631	ENSG00000173209.17	AHSA2	61404553	5.63901	0.440279	1.94889e-07	9.999e-05	7.55872e-06
Thyroid.portal.eqtl:rs2463100	2	61659199	ENSG00000173209.17	AHSA2	61404553	5.63896	0.440285	1.94928e-07	9.999e-05	7.55872e-06
Thyroid.portal.eqtl:rs778155	2	61647901	ENSG00000173209.17	AHSA2	61404553	5.63896	0.440285	1.94928e-07	9.999e-05	7.55872e-06
Thyroid.portal.eqtl:rs1186697	2	61661417	ENSG00000173209.17	AHSA2	61404553	-5.63896	-0.440285	1.94928e-07	9.999e-05	7.55872e-06
Thyroid.portal.eqtl:rs2256615	2	61679894	ENSG00000173209.17	AHSA2	61404553	-5.63896	-0.440285	1.94928e-07	9.999e-05	7.55872e-06
Thyroid.portal.eqtl:rs2442029	2	61679552	ENSG00000173209.17	AHSA2	61404553	-5.63896	-0.440285	1.94928e-07	9.999e-05	7.55872e-06
Thyroid.portal.eqtl:rs4430924	2	61703856	ENSG00000173209.17	AHSA2	61404553	-5.63896	-0.440285	1.94928e-07	9.999e-05	7.55872e-06
Thyroid.portal.eqtl:rs778141	2	61682178	ENSG00000173209.17	AHSA2	61404553	-5.63896	-0.440285	1.94928e-07	9.999e-05	7.55872e-06
Thyroid.portal.eqtl:rs796597	2	61681060	ENSG00000173209.17	AHSA2	61404553	-5.63896	-0.440285	1.94928e-07	9.999e-05	7.55872e-06
Thyroid.portal.eqtl:rs778140	2	61682976	ENSG00000173209.17	AHSA2	61404553	-5.63882	-0.440281	1.95046e-07	9.999e-05	7.55872e-06
Muscle_Skeletal.portal.eqtl:rs2694644	2	61604856	ENSG00000173209.17	AHSA2	61404553	5.52165	0.344405	1.95097e-07	9.999e-05	4.61373e-06
Thyroid.portal.eqtl:rs1186711	2	61688505	ENSG00000173209.17	AHSA2	61404553	-5.63858	-0.440406	1.95249e-07	9.999e-05	7.55872e-06
Thyroid.portal.eqtl:rs778142	2	61681428	ENSG00000173209.17	AHSA2	61404553	-5.63848	-0.439651	1.95331e-07	9.999e-05	7.55872e-06
Thyroid.portal.eqtl:rs2121660	2	61653058	ENSG00000173209.17	AHSA2	61404553	5.63825	0.440263	1.95524e-07	9.999e-05	7.55872e-06
Muscle_Skeletal.portal.eqtl:rs2177962	2	61588070	ENSG00000173209.17	AHSA2	61404553	5.52098	0.344345	1.95694e-07	9.999e-05	4.61373e-06
Muscle_Skeletal.portal.eqtl:rs2694651	2	61588642	ENSG00000173209.17	AHSA2	61404553	5.52098	0.344345	1.95694e-07	9.999e-05	4.61373e-06
Thyroid.portal.eqtl:rs7602859	2	61458206	ENSG00000173209.17	AHSA2	61404553	5.63781	0.437115	1.95891e-07	9.999e-05	7.55872e-06
Thyroid.portal.eqtl:rs35173225	7	73001021	ENSG00000009950.11	MLXIPL	73038873	5.6352	0.899733	1.98096e-07	9.999e-05	7.96634e-06
Thyroid.portal.eqtl:rs12997538	2	61564249	ENSG00000173209.17	AHSA2	61404553	5.63458	0.462747	1.98626e-07	9.999e-05	7.55872e-06
Artery_Tibial.portal.eqtl:rs778144	2	61583128	ENSG00000173209.17	AHSA2	61404553	5.57782	0.440952	2.00897e-07	9.999e-05	7.54981e-06
Lung.portal.eqtl:rs646327	19	49209851	ENSG00000176920.10	FUT2	49199228	-5.57348	-0.429248	2.04771e-07	0.00019998	2.4481e-06
Skin_Sun_Exposed_Lower_leg.portal.eqtl:rs62466318	7	73042085	ENSG00000009950.11	MLXIPL	73038873	5.61656	0.701966	2.05541e-07	0.00049995	5.39652e-06
Whole_Blood.portal.eqtl:rs7985565	13	99113471	ENSG00000231194.1	FARP1-AS1	99088094	5.45348	0.41336	2.05835e-07	0.00029997	4.61695e-06
Artery_Tibial.portal.eqtl:rs778152	2	61608540	ENSG00000173209.17	AHSA2	61404553	5.57127	0.441058	2.06773e-07	9.999e-05	7.54981e-06
Thyroid.portal.eqtl:rs2694636	2	61677137	ENSG00000173209.17	AHSA2	61404553	-5.62417	-0.437207	2.07691e-07	9.999e-05	7.55872e-06
Whole_Blood.portal.eqtl:rs34307821	15	75256826	ENSG00000140497.12	SCAMP2	75165706	5.43869	0.19402	2.20549e-07	0.00029997	2.17485e-06
Whole_Blood.portal.eqtl:rs7985565	13	99113471	ENSG00000152767.11	FARP1	98794816	5.43811	0.356718	2.21147e-07	9.999e-05	3.23607e-06
Thyroid.portal.eqtl:rs10496092	2	61524679	ENSG00000173209.17	AHSA2	61404553	5.60627	0.440045	2.2423e-07	9.999e-05	7.55872e-06
Thyroid.portal.eqtl:rs111269058	7	72975702	ENSG00000009950.11	MLXIPL	73038873	5.60047	0.880091	2.29856e-07	9.999e-05	7.96634e-06
Thyroid.portal.eqtl:rs13225450	7	72976123	ENSG00000009950.11	MLXIPL	73038873	5.60047	0.880091	2.29856e-07	9.999e-05	7.96634e-06
Thyroid.portal.eqtl:rs13232120	7	72983310	ENSG00000009950.11	MLXIPL	73038873	5.60047	0.880091	2.29856e-07	9.999e-05	7.96634e-06
Thyroid.portal.eqtl:rs13233571	7	72971231	ENSG00000009950.11	MLXIPL	73038873	5.60047	0.880091	2.29856e-07	9.999e-05	7.96634e-06
Thyroid.portal.eqtl:rs13246490	7	72992350	ENSG00000009950.11	MLXIPL	73038873	5.60047	0.880091	2.29856e-07	9.999e-05	7.96634e-06
Thyroid.portal.eqtl:rs17145738	7	72982874	ENSG00000009950.11	MLXIPL	73038873	5.60047	0.880091	2.29856e-07	9.999e-05	7.96634e-06
Whole_Blood.portal.eqtl:rs7983438	13	99103317	ENSG00000152767.11	FARP1	98794816	5.42545	0.357378	2.34593e-07	9.999e-05	3.23607e-06
Whole_Blood.portal.eqtl:rs9584850	13	99101426	ENSG00000152767.11	FARP1	98794816	5.42545	0.357378	2.34593e-07	9.999e-05	3.23607e-06
Whole_Blood.portal.eqtl:rs9630321	13	99106979	ENSG00000231194.1	FARP1-AS1	99088094	5.4204	0.411162	2.40174e-07	0.00029997	4.61695e-06
Thyroid.portal.eqtl:rs2638282	19	49213833	ENSG00000142233.7	NTN5	49176338	5.5878	0.350066	2.42647e-07	0.00039996	2.67583e-06
Stomach.portal.eqtl:rs12975781	19	49249698	ENSG00000105538.4	RASIP1	49243978	-5.89222	-0.671447	2.53739e-07	9.999e-05	7.32518e-07
Artery_Tibial.portal.eqtl:rs9807965	2	61732159	ENSG00000173209.17	AHSA2	61404553	-5.52439	-0.435205	2.54026e-07	9.999e-05	7.54981e-06
Artery_Tibial.portal.eqtl:rs12713438	2	61725501	ENSG00000173209.17	AHSA2	61404553	-5.51994	-0.434897	2.59023e-07	9.999e-05	7.54981e-06
Artery_Tibial.portal.eqtl:rs7563678	2	61741811	ENSG00000173209.17	AHSA2	61404553	-5.51977	-0.434894	2.59218e-07	9.999e-05	7.54981e-06
Artery_Tibial.portal.eqtl:rs6718887	2	61727215	ENSG00000173209.17	AHSA2	61404553	-5.51946	-0.43487	2.59572e-07	9.999e-05	7.54981e-06
Artery_Tibial.portal.eqtl:rs6734830	2	61731112	ENSG00000173209.17	AHSA2	61404553	-5.51875	-0.434845	2.60378e-07	9.999e-05	7.54981e-06
Adipose_Subcutaneous.portal.eqtl:rs5751882	22	24864914	ENSG00000100024.10	UPB1	24863206	-5.57452	-0.46484	2.62406e-07	0.00109989	1.89621e-06
Thyroid.portal.eqtl:rs2452170	19	49213504	ENSG00000142233.7	NTN5	49176338	5.56568	0.349872	2.66674e-07	0.00039996	2.67583e-06
Whole_Blood.portal.eqtl:rs12463	13	99105302	ENSG00000231194.1	FARP1-AS1	99088094	5.392	0.408982	2.74068e-07	0.00029997	4.61695e-06
Whole_Blood.portal.eqtl:rs3742136	13	99102607	ENSG00000231194.1	FARP1-AS1	99088094	5.392	0.408982	2.74068e-07	0.00029997	4.61695e-06
Whole_Blood.portal.eqtl:rs3742137	13	99102449	ENSG00000231194.1	FARP1-AS1	99088094	5.392	0.408982	2.74068e-07	0.00029997	4.61695e-06
Whole_Blood.portal.eqtl:rs8481	13	99105395	ENSG00000231194.1	FARP1-AS1	99088094	5.392	0.408982	2.74068e-07	0.00029997	4.61695e-06
Whole_Blood.portal.eqtl:rs9168	13	99101583	ENSG00000231194.1	FARP1-AS1	99088094	5.392	0.408982	2.74068e-07	0.00029997	4.61695e-06
Adipose_Subcutaneous.portal.eqtl:rs2084195	2	61756535	ENSG00000173209.17	AHSA2	61404553	-5.56312	-0.444508	2.75433e-07	9.999e-05	3.79073e-06
Thyroid.portal.eqtl:rs4672425	2	61444998	ENSG00000173209.17	AHSA2	61404553	5.55505	0.427822	2.79035e-07	9.999e-05	7.55872e-06
Adipose_Subcutaneous.portal.eqtl:rs2177961	2	61560264	ENSG00000173209.17	AHSA2	61404553	5.55955	0.442255	2.79645e-07	9.999e-05	3.79073e-06
Artery_Tibial.portal.eqtl:rs6707830	2	61749472	ENSG00000173209.17	AHSA2	61404553	-5.49861	-0.422977	2.84366e-07	9.999e-05	7.54981e-06
Thyroid.portal.eqtl:rs584768	19	49213284	ENSG00000142233.7	NTN5	49176338	5.54916	0.349521	2.86122e-07	0.00039996	2.67583e-06
Artery_Tibial.portal.eqtl:rs13413337	2	61747123	ENSG00000173209.17	AHSA2	61404553	-5.49583	-0.422903	2.87837e-07	9.999e-05	7.54981e-06
Artery_Tibial.portal.eqtl:rs35585307	2	61760141	ENSG00000173209.17	AHSA2	61404553	-5.49579	-0.423688	2.87889e-07	9.999e-05	7.54981e-06
Muscle_Skeletal.portal.eqtl:rs778148	2	61606866	ENSG00000173209.17	AHSA2	61404553	5.4348	0.341792	2.89028e-07	9.999e-05	4.61373e-06
Lung.portal.eqtl:rs492602	19	49206417	ENSG00000176920.10	FUT2	49199228	-5.49448	-0.416961	2.89547e-07	0.00019998	2.4481e-06
Lung.portal.eqtl:rs516246	19	49206172	ENSG00000176920.10	FUT2	49199228	-5.49448	-0.416961	2.89547e-07	0.00019998	2.4481e-06
Lung.portal.eqtl:rs516316	19	49206145	ENSG00000176920.10	FUT2	49199228	-5.49448	-0.416961	2.89547e-07	0.00019998	2.4481e-06
Lung.portal.eqtl:rs679574	19	49206108	ENSG00000176920.10	FUT2	49199228	-5.49448	-0.416961	2.89547e-07	0.00019998	2.4481e-06
Lung.portal.eqtl:rs681343	19	49206462	ENSG00000176920.10	FUT2	49199228	-5.49448	-0.416961	2.89547e-07	0.00019998	2.4481e-06
Lung.portal.eqtl:rs601338	19	49206674	ENSG00000176920.10	FUT2	49199228	-5.49444	-0.416968	2.89596e-07	0.00019998	2.4481e-06
Thyroid.portal.eqtl:rs602662	19	49206985	ENSG00000142233.7	NTN5	49176338	5.5369	0.348622	3.01453e-07	0.00039996	2.67583e-06
Thyroid.portal.eqtl:rs632111	19	49208978	ENSG00000142233.7	NTN5	49176338	5.5369	0.348622	3.01453e-07	0.00039996	2.67583e-06
Thyroid.portal.eqtl:rs492602	19	49206417	ENSG00000142233.7	NTN5	49176338	5.53307	0.344546	3.06397e-07	0.00039996	2.67583e-06
Thyroid.portal.eqtl:rs516246	19	49206172	ENSG00000142233.7	NTN5	49176338	5.53307	0.344546	3.06397e-07	0.00039996	2.67583e-06
Thyroid.portal.eqtl:rs516316	19	49206145	ENSG00000142233.7	NTN5	49176338	5.53307	0.344546	3.06397e-07	0.00039996	2.67583e-06
Thyroid.portal.eqtl:rs679574	19	49206108	ENSG00000142233.7	NTN5	49176338	5.53307	0.344546	3.06397e-07	0.00039996	2.67583e-06
Thyroid.portal.eqtl:rs681343	19	49206462	ENSG00000142233.7	NTN5	49176338	5.53307	0.344546	3.06397e-07	0.00039996	2.67583e-06
Thyroid.portal.eqtl:rs601338	19	49206674	ENSG00000142233.7	NTN5	49176338	5.53305	0.344549	3.06427e-07	0.00039996	2.67583e-06
Artery_Tibial.portal.eqtl:rs1838978	2	61540923	ENSG00000173209.17	AHSA2	61404553	5.48145	0.452198	3.06491e-07	9.999e-05	7.54981e-06
Artery_Tibial.portal.eqtl:rs1186711	2	61688505	ENSG00000173209.17	AHSA2	61404553	-5.48144	-0.436303	3.06511e-07	9.999e-05	7.54981e-06
Artery_Tibial.portal.eqtl:rs778142	2	61681428	ENSG00000173209.17	AHSA2	61404553	-5.48076	-0.436139	3.07423e-07	9.999e-05	7.54981e-06
Artery_Tibial.portal.eqtl:rs778140	2	61682976	ENSG00000173209.17	AHSA2	61404553	-5.4794	-0.436023	3.09248e-07	9.999e-05	7.54981e-06
Artery_Tibial.portal.eqtl:rs2600663	2	61540687	ENSG00000173209.17	AHSA2	61404553	5.47925	0.436022	3.09456e-07	9.999e-05	7.54981e-06
Artery_Tibial.portal.eqtl:rs778141	2	61682178	ENSG00000173209.17	AHSA2	61404553	-5.478	-0.435834	3.11144e-07	9.999e-05	7.54981e-06
Artery_Tibial.portal.eqtl:rs2442031	2	61613785	ENSG00000173209.17	AHSA2	61404553	5.47737	0.43614	3.12003e-07	9.999e-05	7.54981e-06
Whole_Blood.portal.eqtl:rs7988345	13	99117685	ENSG00000231194.1	FARP1-AS1	99088094	5.36399	0.40658	3.12036e-07	0.00029997	4.61695e-06
Artery_Tibial.portal.eqtl:rs1186697	2	61661417	ENSG00000173209.17	AHSA2	61404553	-5.47642	-0.435773	3.13301e-07	9.999e-05	7.54981e-06
Artery_Tibial.portal.eqtl:rs2256615	2	61679894	ENSG00000173209.17	AHSA2	61404553	-5.47619	-0.435764	3.13611e-07	9.999e-05	7.54981e-06
Artery_Tibial.portal.eqtl:rs796597	2	61681060	ENSG00000173209.17	AHSA2	61404553	-5.47619	-0.435764	3.13611e-07	9.999e-05	7.54981e-06
Artery_Tibial.portal.eqtl:rs2442029	2	61679552	ENSG00000173209.17	AHSA2	61404553	-5.47613	-0.435798	3.13697e-07	9.999e-05	7.54981e-06
Artery_Tibial.portal.eqtl:rs2442034	2	61615667	ENSG00000173209.17	AHSA2	61404553	5.47593	0.435978	3.13971e-07	9.999e-05	7.54981e-06
Artery_Tibial.portal.eqtl:rs2950268	2	61615763	ENSG00000173209.17	AHSA2	61404553	5.47593	0.435935	3.13973e-07	9.999e-05	7.54981e-06
Artery_Tibial.portal.eqtl:rs2694625	2	61616055	ENSG00000173209.17	AHSA2	61404553	5.47573	0.435908	3.14238e-07	9.999e-05	7.54981e-06
Artery_Tibial.portal.eqtl:rs2463100	2	61659199	ENSG00000173209.17	AHSA2	61404553	5.47483	0.435711	3.1548e-07	9.999e-05	7.54981e-06
Artery_Tibial.portal.eqtl:rs778154	2	61646631	ENSG00000173209.17	AHSA2	61404553	5.47468	0.435709	3.15688e-07	9.999e-05	7.54981e-06
Artery_Tibial.portal.eqtl:rs778155	2	61647901	ENSG00000173209.17	AHSA2	61404553	5.47415	0.435684	3.1642e-07	9.999e-05	7.54981e-06
Artery_Tibial.portal.eqtl:rs4430924	2	61703856	ENSG00000173209.17	AHSA2	61404553	-5.47415	-0.435684	3.1642e-07	9.999e-05	7.54981e-06
Artery_Tibial.portal.eqtl:rs2427884	2	61775369	ENSG00000173209.17	AHSA2	61404553	-5.47398	-0.428971	3.1665e-07	9.999e-05	7.54981e-06
Thyroid.portal.eqtl:rs28749199	2	61827052	ENSG00000173209.17	AHSA2	61404553	-5.52505	-0.468436	3.17034e-07	9.999e-05	7.55872e-06
Artery_Tibial.portal.eqtl:rs2121660	2	61653058	ENSG00000173209.17	AHSA2	61404553	5.473	0.435637	3.18002e-07	9.999e-05	7.54981e-06
Muscle_Skeletal.portal.eqtl:rs2177961	2	61560264	ENSG00000173209.17	AHSA2	61404553	5.41313	0.334342	3.18637e-07	9.999e-05	4.61373e-06
Thyroid.portal.eqtl:rs34060476	7	73037956	ENSG00000009950.11	MLXIPL	73038873	5.52344	0.829272	3.19208e-07	9.999e-05	7.96634e-06
Lung.portal.eqtl:rs629504	19	49223633	ENSG00000182264.4	IZUMO1	49250166	5.47188	0.532748	3.1957e-07	9.999e-05	2.0959e-06
Whole_Blood.portal.eqtl:rs7139583	13	99113230	ENSG00000152767.11	FARP1	98794816	5.35746	0.355908	3.21609e-07	9.999e-05	3.23607e-06
Lung.portal.eqtl:rs584768	19	49213284	ENSG00000176920.10	FUT2	49199228	-5.46824	-0.432902	3.24677e-07	0.00019998	2.4481e-06
Muscle_Skeletal.portal.eqtl:rs2600663	2	61540687	ENSG00000173209.17	AHSA2	61404553	5.40391	0.340689	3.32123e-07	9.999e-05	4.61373e-06
Artery_Tibial.portal.eqtl:rs7557230	2	61736652	ENSG00000173209.17	AHSA2	61404553	-5.46055	-0.44572	3.35738e-07	9.999e-05	7.54981e-06
Lung.portal.eqtl:rs2638282	19	49213833	ENSG00000176920.10	FUT2	49199228	-5.45999	-0.432229	3.36559e-07	0.00019998	2.4481e-06
Adipose_Subcutaneous.portal.eqtl:rs777585	2	61412559	ENSG00000173209.17	AHSA2	61404553	-5.5095	-0.443628	3.45787e-07	9.999e-05	3.79073e-06
Lung.portal.eqtl:rs546308	19	49223570	ENSG00000182264.4	IZUMO1	49250166	5.4515	0.530744	3.49233e-07	9.999e-05	2.0959e-06
Muscle_Skeletal.portal.eqtl:rs12986713	2	61740646	ENSG00000173209.17	AHSA2	61404553	-5.38603	-0.340351	3.59856e-07	9.999e-05	4.61373e-06
Thyroid.portal.eqtl:rs1838978	2	61540923	ENSG00000173209.17	AHSA2	61404553	5.48873	0.454599	3.69876e-07	9.999e-05	7.55872e-06
Adipose_Subcutaneous.portal.eqtl:rs7557230	2	61736652	ENSG00000173209.17	AHSA2	61404553	-5.49352	-0.4478	3.69977e-07	9.999e-05	3.79073e-06
Adipose_Subcutaneous.portal.eqtl:rs9679557	2	61709349	ENSG00000173209.17	AHSA2	61404553	-5.49028	-0.442274	3.7508e-07	9.999e-05	3.79073e-06
Whole_Blood.portal.eqtl:rs4294654	13	99119607	ENSG00000231194.1	FARP1-AS1	99088094	5.32229	0.403288	3.78246e-07	0.00029997	4.61695e-06
Muscle_Skeletal.portal.eqtl:rs10496092	2	61524679	ENSG00000173209.17	AHSA2	61404553	5.37422	0.33228	3.79423e-07	9.999e-05	4.61373e-06
Artery_Tibial.portal.eqtl:rs3771260	2	61762384	ENSG00000173209.17	AHSA2	61404553	-5.42801	-0.419741	3.8679e-07	9.999e-05	7.54981e-06
Whole_Blood.portal.eqtl:rs3812945	15	75289722	ENSG00000140497.12	SCAMP2	75165706	5.31702	0.191057	3.87535e-07	0.00029997	2.17485e-06
Whole_Blood.portal.eqtl:rs9584855	13	99119000	ENSG00000231194.1	FARP1-AS1	99088094	5.31459	0.402559	3.91898e-07	0.00029997	4.61695e-06
Whole_Blood.portal.eqtl:rs12869627	13	99120452	ENSG00000231194.1	FARP1-AS1	99088094	5.31436	0.402535	3.92311e-07	0.00029997	4.61695e-06
Whole_Blood.portal.eqtl:rs745639	13	99119279	ENSG00000231194.1	FARP1-AS1	99088094	5.31436	0.402535	3.92311e-07	0.00029997	4.61695e-06
Whole_Blood.portal.eqtl:rs9584854	13	99118590	ENSG00000231194.1	FARP1-AS1	99088094	5.31436	0.402535	3.92311e-07	0.00029997	4.61695e-06
Esophagus_Mucosa.portal.eqtl:rs11083948	19	49248120	ENSG00000105538.4	RASIP1	49243978	-5.57615	-0.564545	3.92471e-07	0.00049995	2.09513e-06
Esophagus_Mucosa.portal.eqtl:rs11672046	19	49247601	ENSG00000105538.4	RASIP1	49243978	-5.57615	-0.564545	3.92471e-07	0.00049995	2.09513e-06
Esophagus_Mucosa.portal.eqtl:rs12460295	19	49247124	ENSG00000105538.4	RASIP1	49243978	-5.57615	-0.564545	3.92471e-07	0.00049995	2.09513e-06
Esophagus_Mucosa.portal.eqtl:rs12462324	19	49247086	ENSG00000105538.4	RASIP1	49243978	-5.57615	-0.564545	3.92471e-07	0.00049995	2.09513e-06
Esophagus_Mucosa.portal.eqtl:rs12611201	19	49248255	ENSG00000105538.4	RASIP1	49243978	-5.57615	-0.564545	3.92471e-07	0.00049995	2.09513e-06
Esophagus_Mucosa.portal.eqtl:rs12611203	19	49248295	ENSG00000105538.4	RASIP1	49243978	-5.57615	-0.564545	3.92471e-07	0.00049995	2.09513e-06
Esophagus_Mucosa.portal.eqtl:rs12611211	19	49248331	ENSG00000105538.4	RASIP1	49243978	-5.57615	-0.564545	3.92471e-07	0.00049995	2.09513e-06
Esophagus_Mucosa.portal.eqtl:rs12975033	19	49249443	ENSG00000105538.4	RASIP1	49243978	-5.57615	-0.564545	3.92471e-07	0.00049995	2.09513e-06
Esophagus_Mucosa.portal.eqtl:rs12982115	19	49248640	ENSG00000105538.4	RASIP1	49243978	-5.57615	-0.564545	3.92471e-07	0.00049995	2.09513e-06
Esophagus_Mucosa.portal.eqtl:rs28400015	19	49250633	ENSG00000105538.4	RASIP1	49243978	-5.57615	-0.564545	3.92471e-07	0.00049995	2.09513e-06
Esophagus_Mucosa.portal.eqtl:rs8108136	19	49247693	ENSG00000105538.4	RASIP1	49243978	-5.57615	-0.564545	3.92471e-07	0.00049995	2.09513e-06
Esophagus_Mucosa.portal.eqtl:rs8108468	19	49247786	ENSG00000105538.4	RASIP1	49243978	-5.57615	-0.564545	3.92471e-07	0.00049995	2.09513e-06
Esophagus_Mucosa.portal.eqtl:rs8111288	19	49247900	ENSG00000105538.4	RASIP1	49243978	-5.57615	-0.564545	3.92471e-07	0.00049995	2.09513e-06
Esophagus_Mucosa.portal.eqtl:rs8111399	19	49247963	ENSG00000105538.4	RASIP1	49243978	-5.57615	-0.564545	3.92471e-07	0.00049995	2.09513e-06
Heart_Left_Ventricle.portal.eqtl:rs28400015	19	49250633	ENSG00000176909.7	MAMSTR	49222978	-5.6435	-0.568	3.93109e-07	0.00109989	9.7848e-07
Heart_Left_Ventricle.portal.eqtl:rs8102032	19	49249795	ENSG00000176909.7	MAMSTR	49222978	-5.6435	-0.568	3.93109e-07	0.00109989	9.7848e-07
Heart_Left_Ventricle.portal.eqtl:rs8104897	19	49249814	ENSG00000176909.7	MAMSTR	49222978	-5.6435	-0.568	3.93109e-07	0.00109989	9.7848e-07
Heart_Left_Ventricle.portal.eqtl:rs8105137	19	49249888	ENSG00000176909.7	MAMSTR	49222978	-5.6435	-0.568	3.93109e-07	0.00109989	9.7848e-07
Esophagus_Mucosa.portal.eqtl:rs8111208	19	49248022	ENSG00000105538.4	RASIP1	49243978	-5.57503	-0.564642	3.94242e-07	0.00049995	2.09513e-06
Whole_Blood.portal.eqtl:rs12869627	13	99120452	ENSG00000152767.11	FARP1	98794816	5.30549	0.347705	4.08635e-07	9.999e-05	3.23607e-06
Whole_Blood.portal.eqtl:rs745639	13	99119279	ENSG00000152767.11	FARP1	98794816	5.30549	0.347705	4.08635e-07	9.999e-05	3.23607e-06
Whole_Blood.portal.eqtl:rs9584854	13	99118590	ENSG00000152767.11	FARP1	98794816	5.30549	0.347705	4.08635e-07	9.999e-05	3.23607e-06
Whole_Blood.portal.eqtl:rs9584855	13	99119000	ENSG00000152767.11	FARP1	98794816	5.30545	0.347711	4.087e-07	9.999e-05	3.23607e-06
Whole_Blood.portal.eqtl:rs7139583	13	99113230	ENSG00000231194.1	FARP1-AS1	99088094	5.30542	0.408108	4.08768e-07	0.00029997	4.61695e-06
Whole_Blood.portal.eqtl:rs4294654	13	99119607	ENSG00000152767.11	FARP1	98794816	5.30471	0.347878	4.10101e-07	9.999e-05	3.23607e-06
Whole_Blood.portal.eqtl:rs7988345	13	99117685	ENSG00000152767.11	FARP1	98794816	5.29461	0.347879	4.29567e-07	9.999e-05	3.23607e-06
Artery_Tibial.portal.eqtl:rs6545883	2	61772257	ENSG00000173209.17	AHSA2	61404553	-5.40339	-0.424642	4.3041e-07	9.999e-05	7.54981e-06
Artery_Tibial.portal.eqtl:rs2694636	2	61677137	ENSG00000173209.17	AHSA2	61404553	-5.39923	-0.429436	4.38227e-07	9.999e-05	7.54981e-06
Thyroid.portal.eqtl:rs2600663	2	61540687	ENSG00000173209.17	AHSA2	61404553	5.44828	0.44721	4.38924e-07	9.999e-05	7.55872e-06
Lung.portal.eqtl:rs281377	19	49206603	ENSG00000176920.10	FUT2	49199228	5.39816	0.396516	4.40275e-07	0.00019998	2.4481e-06
Artery_Tibial.portal.eqtl:rs778767	2	61787028	ENSG00000173209.17	AHSA2	61404553	-5.3974	-0.434648	4.41715e-07	9.999e-05	7.54981e-06
Esophagus_Mucosa.portal.eqtl:rs56066508	19	49241400	ENSG00000105538.4	RASIP1	49243978	-5.54163	-0.562335	4.50932e-07	0.00049995	2.09513e-06
Esophagus_Mucosa.portal.eqtl:rs12981072	19	49241006	ENSG00000105538.4	RASIP1	49243978	-5.54147	-0.562332	4.5122e-07	0.00049995	2.09513e-06
Artery_Tibial.portal.eqtl:rs9679557	2	61709349	ENSG00000173209.17	AHSA2	61404553	-5.39045	-0.434124	4.55225e-07	9.999e-05	7.54981e-06
Esophagus_Mucosa.portal.eqtl:rs12978499	19	49237552	ENSG00000105538.4	RASIP1	49243978	-5.53906	-0.561466	4.55604e-07	0.00049995	2.09513e-06
Esophagus_Mucosa.portal.eqtl:rs12979144	19	49237547	ENSG00000105538.4	RASIP1	49243978	-5.53906	-0.561466	4.55604e-07	0.00049995	2.09513e-06
Esophagus_Mucosa.portal.eqtl:rs281408	19	49233406	ENSG00000105538.4	RASIP1	49243978	-5.53866	-0.561452	4.56337e-07	0.00049995	2.09513e-06
Thyroid.portal.eqtl:rs8061772	16	30119525	ENSG00000261367.1	RP11-455F5.4	30118996	-5.43796	-0.810293	4.58481e-07	0.00049995	9.64221e-06
Artery_Tibial.portal.eqtl:rs2084195	2	61756535	ENSG00000173209.17	AHSA2	61404553	-5.38303	-0.417376	4.70065e-07	9.999e-05	7.54981e-06
Adipose_Subcutaneous.portal.eqtl:rs12997538	2	61564249	ENSG00000173209.17	AHSA2	61404553	5.42777	0.439447	4.88191e-07	9.999e-05	3.79073e-06
Adipose_Subcutaneous.portal.eqtl:rs11125885	2	61755728	ENSG00000173209.17	AHSA2	61404553	-5.42655	-0.440277	4.90701e-07	9.999e-05	3.79073e-06
Adipose_Subcutaneous.portal.eqtl:rs12713439	2	61752154	ENSG00000173209.17	AHSA2	61404553	-5.42635	-0.440257	4.91122e-07	9.999e-05	3.79073e-06
Adipose_Subcutaneous.portal.eqtl:rs2305156	2	61729268	ENSG00000173209.17	AHSA2	61404553	-5.42635	-0.440257	4.91122e-07	9.999e-05	3.79073e-06
Adipose_Subcutaneous.portal.eqtl:rs3732170	2	61749716	ENSG00000173209.17	AHSA2	61404553	-5.42635	-0.440257	4.91122e-07	9.999e-05	3.79073e-06
Adipose_Subcutaneous.portal.eqtl:rs6545877	2	61741947	ENSG00000173209.17	AHSA2	61404553	-5.42635	-0.440257	4.91122e-07	9.999e-05	3.79073e-06
Adipose_Subcutaneous.portal.eqtl:rs7421663	2	61753786	ENSG00000173209.17	AHSA2	61404553	-5.42635	-0.440257	4.91122e-07	9.999e-05	3.79073e-06
Adipose_Subcutaneous.portal.eqtl:rs7606167	2	61742654	ENSG00000173209.17	AHSA2	61404553	-5.42635	-0.440257	4.91122e-07	9.999e-05	3.79073e-06
Adipose_Subcutaneous.portal.eqtl:rs9309336	2	61763165	ENSG00000173209.17	AHSA2	61404553	-5.42635	-0.440257	4.91122e-07	9.999e-05	3.79073e-06
Adipose_Subcutaneous.portal.eqtl:rs9989775	2	61761774	ENSG00000173209.17	AHSA2	61404553	-5.42635	-0.440257	4.91122e-07	9.999e-05	3.79073e-06
Lung.portal.eqtl:rs2452170	19	49213504	ENSG00000176920.10	FUT2	49199228	-5.36986	-0.425991	4.97619e-07	0.00019998	2.4481e-06
Whole_Blood.portal.eqtl:rs4411372	13	99130423	ENSG00000231194.1	FARP1-AS1	99088094	5.258	0.419265	5.07958e-07	0.00029997	4.61695e-06
Adipose_Subcutaneous.portal.eqtl:rs2600663	2	61540687	ENSG00000173209.17	AHSA2	61404553	5.41388	0.433022	5.17548e-07	9.999e-05	3.79073e-06
Artery_Tibial.portal.eqtl:rs11125885	2	61755728	ENSG00000173209.17	AHSA2	61404553	-5.3597	-0.435066	5.19927e-07	9.999e-05	7.54981e-06
Artery_Tibial.portal.eqtl:rs12473030	2	61720497	ENSG00000173209.17	AHSA2	61404553	-5.35957	-0.435053	5.20229e-07	9.999e-05	7.54981e-06
Artery_Tibial.portal.eqtl:rs12713439	2	61752154	ENSG00000173209.17	AHSA2	61404553	-5.35957	-0.435053	5.20229e-07	9.999e-05	7.54981e-06
Artery_Tibial.portal.eqtl:rs2305156	2	61729268	ENSG00000173209.17	AHSA2	61404553	-5.35957	-0.435053	5.20229e-07	9.999e-05	7.54981e-06
Artery_Tibial.portal.eqtl:rs3732170	2	61749716	ENSG00000173209.17	AHSA2	61404553	-5.35957	-0.435053	5.20229e-07	9.999e-05	7.54981e-06
Artery_Tibial.portal.eqtl:rs6545877	2	61741947	ENSG00000173209.17	AHSA2	61404553	-5.35957	-0.435053	5.20229e-07	9.999e-05	7.54981e-06
Artery_Tibial.portal.eqtl:rs7421663	2	61753786	ENSG00000173209.17	AHSA2	61404553	-5.35957	-0.435053	5.20229e-07	9.999e-05	7.54981e-06
Artery_Tibial.portal.eqtl:rs7606167	2	61742654	ENSG00000173209.17	AHSA2	61404553	-5.35957	-0.435053	5.20229e-07	9.999e-05	7.54981e-06
Artery_Tibial.portal.eqtl:rs9309336	2	61763165	ENSG00000173209.17	AHSA2	61404553	-5.35957	-0.435053	5.20229e-07	9.999e-05	7.54981e-06
Artery_Tibial.portal.eqtl:rs9989775	2	61761774	ENSG00000173209.17	AHSA2	61404553	-5.35957	-0.435053	5.20229e-07	9.999e-05	7.54981e-06
Artery_Tibial.portal.eqtl:rs12713437	2	61722904	ENSG00000173209.17	AHSA2	61404553	-5.35938	-0.435056	5.20658e-07	9.999e-05	7.54981e-06
Adipose_Subcutaneous.portal.eqtl:rs11678419	2	61743377	ENSG00000173209.17	AHSA2	61404553	-5.41154	-0.440571	5.22665e-07	9.999e-05	3.79073e-06
Artery_Tibial.portal.eqtl:rs12612677	2	61729695	ENSG00000173209.17	AHSA2	61404553	-5.35306	-0.440033	5.35038e-07	9.999e-05	7.54981e-06
Whole_Blood.portal.eqtl:rs6491427	13	99113166	ENSG00000152767.11	FARP1	98794816	5.24388	0.348098	5.41778e-07	9.999e-05	3.23607e-06
Artery_Tibial.portal.eqtl:rs11691734	2	61702466	ENSG00000173209.17	AHSA2	61404553	-5.34471	-0.427059	5.54669e-07	9.999e-05	7.54981e-06
Artery_Tibial.portal.eqtl:rs6545872	2	61724568	ENSG00000173209.17	AHSA2	61404553	-5.34438	-0.432381	5.55446e-07	9.999e-05	7.54981e-06
Artery_Tibial.portal.eqtl:rs1867839	2	61694797	ENSG00000173209.17	AHSA2	61404553	-5.3384	-0.426709	5.69943e-07	9.999e-05	7.54981e-06
Artery_Tibial.portal.eqtl:rs10496092	2	61524679	ENSG00000173209.17	AHSA2	61404553	5.33811	0.427303	5.70657e-07	9.999e-05	7.54981e-06
Nerve_Tibial.portal.eqtl:rs2630390	1	72603400	ENSG00000227207.2	RP11-292O17.1	72767155	5.43288	0.607019	5.81925e-07	0.00019998	2.36851e-06
Skin_Sun_Exposed_Lower_leg.portal.eqtl:rs34062580	7	73033559	ENSG00000009950.11	MLXIPL	73038873	5.37026	0.771965	5.87356e-07	0.00049995	5.39652e-06
Heart_Left_Ventricle.portal.eqtl:rs12975033	19	49249443	ENSG00000176909.7	MAMSTR	49222978	-5.53974	-0.559388	5.8838e-07	0.00109989	9.7848e-07
Artery_Tibial.portal.eqtl:rs1465042	2	61572322	ENSG00000173209.17	AHSA2	61404553	5.33089	0.424301	5.88678e-07	9.999e-05	7.54981e-06
Artery_Tibial.portal.eqtl:rs11678419	2	61743377	ENSG00000173209.17	AHSA2	61404553	-5.33004	-0.434097	5.90847e-07	9.999e-05	7.54981e-06
Whole_Blood.portal.eqtl:rs4584	13	99101869	ENSG00000231194.1	FARP1-AS1	99088094	5.22045	0.398787	6.02798e-07	0.00029997	4.61695e-06
Thyroid.portal.eqtl:rs12986713	2	61740646	ENSG00000173209.17	AHSA2	61404553	-5.36938	-0.455747	6.1189e-07	9.999e-05	7.55872e-06
Whole_Blood.portal.eqtl:rs35103257	15	75277412	ENSG00000140497.12	SCAMP2	75165706	5.21677	0.192592	6.12994e-07	0.00029997	2.17485e-06
Skin_Sun_Exposed_Lower_leg.portal.eqtl:rs71556736	7	73034929	ENSG00000009950.11	MLXIPL	73038873	5.35986	0.771868	6.13693e-07	0.00049995	5.39652e-06
Esophagus_Mucosa.portal.eqtl:rs7897379	10	65301725	ENSG00000148572.10	NRBF2	64893050	-5.4646	-0.47351	6.14029e-07	0.00079992	3.75225e-06
Esophagus_Mucosa.portal.eqtl:rs10740134	10	65315433	ENSG00000148572.10	NRBF2	64893050	-5.464	-0.473466	6.15499e-07	0.00079992	3.75225e-06
Adipose_Subcutaneous.portal.eqtl:rs10173974	2	61748900	ENSG00000173209.17	AHSA2	61404553	-5.37052	-0.419082	6.20751e-07	9.999e-05	3.79073e-06
Adipose_Subcutaneous.portal.eqtl:rs10186325	2	61757721	ENSG00000173209.17	AHSA2	61404553	-5.37052	-0.419082	6.20751e-07	9.999e-05	3.79073e-06
Adipose_Subcutaneous.portal.eqtl:rs12612982	2	61747355	ENSG00000173209.17	AHSA2	61404553	-5.37052	-0.419082	6.20751e-07	9.999e-05	3.79073e-06
Adipose_Subcutaneous.portal.eqtl:rs3732171	2	61749690	ENSG00000173209.17	AHSA2	61404553	-5.37052	-0.419082	6.20751e-07	9.999e-05	3.79073e-06
Adipose_Subcutaneous.portal.eqtl:rs9989864	2	61761637	ENSG00000173209.17	AHSA2	61404553	-5.37052	-0.419082	6.20751e-07	9.999e-05	3.79073e-06
Adipose_Subcutaneous.portal.eqtl:rs3771261	2	61762161	ENSG00000173209.17	AHSA2	61404553	-5.37034	-0.419061	6.21221e-07	9.999e-05	3.79073e-06
Esophagus_Mucosa.portal.eqtl:rs2307018	19	49244219	ENSG00000105538.4	RASIP1	49243978	-5.4612	-0.555124	6.2242e-07	0.00049995	2.09513e-06
Esophagus_Mucosa.portal.eqtl:rs2307019	19	49244220	ENSG00000105538.4	RASIP1	49243978	-5.4612	-0.555124	6.2242e-07	0.00049995	2.09513e-06
Esophagus_Mucosa.portal.eqtl:rs8102032	19	49249795	ENSG00000105538.4	RASIP1	49243978	-5.4612	-0.555124	6.2242e-07	0.00049995	2.09513e-06
Esophagus_Mucosa.portal.eqtl:rs8104897	19	49249814	ENSG00000105538.4	RASIP1	49243978	-5.4612	-0.555124	6.2242e-07	0.00049995	2.09513e-06
Esophagus_Mucosa.portal.eqtl:rs8105137	19	49249888	ENSG00000105538.4	RASIP1	49243978	-5.4612	-0.555124	6.2242e-07	0.00049995	2.09513e-06
Artery_Tibial.portal.eqtl:rs2421207	2	61769405	ENSG00000173209.17	AHSA2	61404553	-5.31548	-0.422557	6.29015e-07	9.999e-05	7.54981e-06
Lung.portal.eqtl:rs8061772	16	30119525	ENSG00000261367.1	RP11-455F5.4	30118996	-5.31342	-0.854067	6.34623e-07	0.00079992	5.35944e-06
Artery_Tibial.portal.eqtl:rs2694634	2	61551435	ENSG00000173209.17	AHSA2	61404553	5.31037	0.426739	6.4299e-07	9.999e-05	7.54981e-06
Artery_Tibial.portal.eqtl:rs7572603	2	61552145	ENSG00000173209.17	AHSA2	61404553	5.31021	0.426726	6.43432e-07	9.999e-05	7.54981e-06
Artery_Tibial.portal.eqtl:rs778157	2	61554289	ENSG00000173209.17	AHSA2	61404553	5.30989	0.4267	6.44317e-07	9.999e-05	7.54981e-06
Artery_Tibial.portal.eqtl:rs778158	2	61555421	ENSG00000173209.17	AHSA2	61404553	5.30973	0.426688	6.44761e-07	9.999e-05	7.54981e-06
Esophagus_Mucosa.portal.eqtl:rs412712	19	49234299	ENSG00000105538.4	RASIP1	49243978	-5.45112	-0.555909	6.4799e-07	0.00049995	2.09513e-06
Esophagus_Mucosa.portal.eqtl:rs10761729	10	64995604	ENSG00000148572.10	NRBF2	64893050	-5.45038	-0.485299	6.49914e-07	0.00079992	3.75225e-06
Thyroid.portal.eqtl:rs2593633	2	61571513	ENSG00000173209.17	AHSA2	61404553	5.35317	0.424882	6.5494e-07	9.999e-05	7.55872e-06
Thyroid.portal.eqtl:rs778144	2	61583128	ENSG00000173209.17	AHSA2	61404553	5.35317	0.424882	6.5494e-07	9.999e-05	7.55872e-06
Thyroid.portal.eqtl:rs2463102	2	61571295	ENSG00000173209.17	AHSA2	61404553	5.35111	0.424883	6.60611e-07	9.999e-05	7.55872e-06
Whole_Blood.portal.eqtl:rs7983438	13	99103317	ENSG00000231194.1	FARP1-AS1	99088094	5.2001	0.398724	6.61202e-07	0.00029997	4.61695e-06
Whole_Blood.portal.eqtl:rs9584850	13	99101426	ENSG00000231194.1	FARP1-AS1	99088094	5.2001	0.398724	6.61202e-07	0.00029997	4.61695e-06
Thyroid.portal.eqtl:rs778152	2	61608540	ENSG00000173209.17	AHSA2	61404553	5.35032	0.425039	6.62803e-07	9.999e-05	7.55872e-06
Artery_Tibial.portal.eqtl:rs13003376	2	61691440	ENSG00000173209.17	AHSA2	61404553	-5.30025	-0.427402	6.71566e-07	9.999e-05	7.54981e-06
Artery_Tibial.portal.eqtl:rs6705235	2	61713580	ENSG00000173209.17	AHSA2	61404553	-5.29946	-0.426004	6.7384e-07	9.999e-05	7.54981e-06
Artery_Tibial.portal.eqtl:rs3821222	2	61713526	ENSG00000173209.17	AHSA2	61404553	-5.29898	-0.425954	6.75227e-07	9.999e-05	7.54981e-06
Esophagus_Mucosa.portal.eqtl:rs10733793	10	65323809	ENSG00000148572.10	NRBF2	64893050	-5.43498	-0.45374	6.91138e-07	0.00079992	3.75225e-06
Esophagus_Mucosa.portal.eqtl:rs10822182	10	65325478	ENSG00000148572.10	NRBF2	64893050	-5.43498	-0.45374	6.91138e-07	0.00079992	3.75225e-06
Adipose_Subcutaneous.portal.eqtl:rs3771258	2	61764140	ENSG00000173209.17	AHSA2	61404553	-5.34416	-0.441963	6.93083e-07	9.999e-05	3.79073e-06
Adipose_Subcutaneous.portal.eqtl:rs11887205	2	61774473	ENSG00000173209.17	AHSA2	61404553	-5.34385	-0.441949	6.93956e-07	9.999e-05	3.79073e-06
Adipose_Subcutaneous.portal.eqtl:rs1562308	2	61768421	ENSG00000173209.17	AHSA2	61404553	-5.34385	-0.441949	6.93956e-07	9.999e-05	3.79073e-06
Adipose_Subcutaneous.portal.eqtl:rs778752	2	61776902	ENSG00000173209.17	AHSA2	61404553	-5.34385	-0.441949	6.93956e-07	9.999e-05	3.79073e-06
Artery_Tibial.portal.eqtl:rs12617911	2	61740825	ENSG00000173209.17	AHSA2	61404553	-5.29202	-0.425658	6.95679e-07	9.999e-05	7.54981e-06
Artery_Tibial.portal.eqtl:rs1992765	2	61751333	ENSG00000173209.17	AHSA2	61404553	-5.29202	-0.425658	6.95679e-07	9.999e-05	7.54981e-06
Artery_Tibial.portal.eqtl:rs2305155	2	61729258	ENSG00000173209.17	AHSA2	61404553	-5.29202	-0.425658	6.95679e-07	9.999e-05	7.54981e-06
Artery_Tibial.portal.eqtl:rs6545873	2	61733012	ENSG00000173209.17	AHSA2	61404553	-5.29202	-0.425658	6.95679e-07	9.999e-05	7.54981e-06
Artery_Tibial.portal.eqtl:rs7561229	2	61737990	ENSG00000173209.17	AHSA2	61404553	-5.29165	-0.425631	6.96797e-07	9.999e-05	7.54981e-06
Artery_Tibial.portal.eqtl:rs2593625	2	61668769	ENSG00000173209.17	AHSA2	61404553	-5.29159	-0.42501	6.96984e-07	9.999e-05	7.54981e-06
Muscle_Skeletal.portal.eqtl:rs6749226	2	61509783	ENSG00000173209.17	AHSA2	61404553	5.23612	0.330198	7.01027e-07	9.999e-05	4.61373e-06
Artery_Tibial.portal.eqtl:rs13023037	2	61620989	ENSG00000173209.17	AHSA2	61404553	5.2897	0.425486	7.02653e-07	9.999e-05	7.54981e-06
Muscle_Skeletal.portal.eqtl:rs12620105	2	61512321	ENSG00000173209.17	AHSA2	61404553	5.23482	0.330095	7.05068e-07	9.999e-05	4.61373e-06
Muscle_Skeletal.portal.eqtl:rs13004855	2	61505072	ENSG00000173209.17	AHSA2	61404553	5.23436	0.330063	7.06497e-07	9.999e-05	4.61373e-06
Artery_Tibial.portal.eqtl:rs4672445	2	61655008	ENSG00000173209.17	AHSA2	61404553	5.28725	0.424529	7.10069e-07	9.999e-05	7.54981e-06
Artery_Tibial.portal.eqtl:rs10190332	2	61619267	ENSG00000173209.17	AHSA2	61404553	5.28678	0.424491	7.11507e-07	9.999e-05	7.54981e-06
Artery_Tibial.portal.eqtl:rs1900572	2	61650715	ENSG00000173209.17	AHSA2	61404553	5.28678	0.424491	7.11507e-07	9.999e-05	7.54981e-06
Artery_Tibial.portal.eqtl:rs2593627	2	61618574	ENSG00000173209.17	AHSA2	61404553	5.28678	0.424491	7.11507e-07	9.999e-05	7.54981e-06
Artery_Tibial.portal.eqtl:rs6545867	2	61651027	ENSG00000173209.17	AHSA2	61404553	5.28678	0.424491	7.11507e-07	9.999e-05	7.54981e-06
Artery_Tibial.portal.eqtl:rs2264100	2	61670829	ENSG00000173209.17	AHSA2	61404553	-5.28678	-0.424491	7.11507e-07	9.999e-05	7.54981e-06
Artery_Tibial.portal.eqtl:rs6545871	2	61692203	ENSG00000173209.17	AHSA2	61404553	-5.28488	-0.42434	7.17307e-07	9.999e-05	7.54981e-06
Artery_Tibial.portal.eqtl:rs7560978	2	61619588	ENSG00000173209.17	AHSA2	61404553	5.28147	0.424289	7.27866e-07	9.999e-05	7.54981e-06
Adipose_Subcutaneous.portal.eqtl:rs12473030	2	61720497	ENSG00000173209.17	AHSA2	61404553	-5.32914	-0.433509	7.37897e-07	9.999e-05	3.79073e-06
Adipose_Subcutaneous.portal.eqtl:rs12617911	2	61740825	ENSG00000173209.17	AHSA2	61404553	-5.32097	-0.425118	7.63464e-07	9.999e-05	3.79073e-06
Adipose_Subcutaneous.portal.eqtl:rs1992765	2	61751333	ENSG00000173209.17	AHSA2	61404553	-5.32097	-0.425118	7.63464e-07	9.999e-05	3.79073e-06
Adipose_Subcutaneous.portal.eqtl:rs2305155	2	61729258	ENSG00000173209.17	AHSA2	61404553	-5.32097	-0.425118	7.63464e-07	9.999e-05	3.79073e-06
Adipose_Subcutaneous.portal.eqtl:rs6545873	2	61733012	ENSG00000173209.17	AHSA2	61404553	-5.32097	-0.425118	7.63464e-07	9.999e-05	3.79073e-06
Adipose_Subcutaneous.portal.eqtl:rs7561229	2	61737990	ENSG00000173209.17	AHSA2	61404553	-5.32097	-0.425118	7.63464e-07	9.999e-05	3.79073e-06
Adipose_Subcutaneous.portal.eqtl:rs6707830	2	61749472	ENSG00000173209.17	AHSA2	61404553	-5.32037	-0.411643	7.65377e-07	9.999e-05	3.79073e-06
Artery_Tibial.portal.eqtl:rs778752	2	61776902	ENSG00000173209.17	AHSA2	61404553	-5.26903	-0.43777	7.6771e-07	9.999e-05	7.54981e-06
Adipose_Subcutaneous.portal.eqtl:rs12713437	2	61722904	ENSG00000173209.17	AHSA2	61404553	-5.31948	-0.433038	7.6823e-07	9.999e-05	3.79073e-06
Artery_Tibial.portal.eqtl:rs3771258	2	61764140	ENSG00000173209.17	AHSA2	61404553	-5.26535	-0.437528	7.79883e-07	9.999e-05	7.54981e-06
Artery_Tibial.portal.eqtl:rs1562308	2	61768421	ENSG00000173209.17	AHSA2	61404553	-5.26503	-0.437516	7.80944e-07	9.999e-05	7.54981e-06
Heart_Left_Ventricle.portal.eqtl:rs546308	19	49223570	ENSG00000176909.7	MAMSTR	49222978	5.46606	0.549234	7.82373e-07	0.00109989	9.7848e-07
Adipose_Subcutaneous.portal.eqtl:rs778763	2	61785639	ENSG00000173209.17	AHSA2	61404553	-5.31505	-0.440755	7.82547e-07	9.999e-05	3.79073e-06
Muscle_Skeletal.portal.eqtl:rs11638576	15	75260387	ENSG00000138621.7	PPCDC	75315896	-5.20415	-0.348372	8.07055e-07	0.00139986	4.36462e-06
Artery_Tibial.portal.eqtl:rs3771261	2	61762161	ENSG00000173209.17	AHSA2	61404553	-5.25483	-0.411337	8.15759e-07	9.999e-05	7.54981e-06
Artery_Tibial.portal.eqtl:rs10173974	2	61748900	ENSG00000173209.17	AHSA2	61404553	-5.25426	-0.411281	8.17763e-07	9.999e-05	7.54981e-06
Artery_Tibial.portal.eqtl:rs10186325	2	61757721	ENSG00000173209.17	AHSA2	61404553	-5.25426	-0.411281	8.17763e-07	9.999e-05	7.54981e-06
Artery_Tibial.portal.eqtl:rs12612982	2	61747355	ENSG00000173209.17	AHSA2	61404553	-5.25426	-0.411281	8.17763e-07	9.999e-05	7.54981e-06
Artery_Tibial.portal.eqtl:rs3732171	2	61749690	ENSG00000173209.17	AHSA2	61404553	-5.25426	-0.411281	8.17763e-07	9.999e-05	7.54981e-06
Artery_Tibial.portal.eqtl:rs9989864	2	61761637	ENSG00000173209.17	AHSA2	61404553	-5.25426	-0.411281	8.17763e-07	9.999e-05	7.54981e-06
Nerve_Tibial.portal.eqtl:rs2821246	1	72577179	ENSG00000227207.2	RP11-292O17.1	72767155	5.34868	0.582671	8.20431e-07	0.00019998	2.36851e-06
Artery_Tibial.portal.eqtl:rs1186710	2	61688727	ENSG00000173209.17	AHSA2	61404553	-5.25344	-0.418244	8.20628e-07	9.999e-05	7.54981e-06
Artery_Tibial.portal.eqtl:rs778768	2	61790289	ENSG00000173209.17	AHSA2	61404553	-5.25324	-0.436276	8.21331e-07	9.999e-05	7.54981e-06
Artery_Tibial.portal.eqtl:rs778763	2	61785639	ENSG00000173209.17	AHSA2	61404553	-5.25252	-0.436936	8.23847e-07	9.999e-05	7.54981e-06
Heart_Left_Ventricle.portal.eqtl:rs629504	19	49223633	ENSG00000176909.7	MAMSTR	49222978	5.45143	0.547755	8.27821e-07	0.00109989	9.7848e-07
Skin_Sun_Exposed_Lower_leg.portal.eqtl:rs17145750	7	73026378	ENSG00000009950.11	MLXIPL	73038873	5.28493	0.735518	8.40786e-07	0.00049995	5.39652e-06
Adipose_Subcutaneous.portal.eqtl:rs778768	2	61790289	ENSG00000173209.17	AHSA2	61404553	-5.29656	-0.438156	8.4514e-07	9.999e-05	3.79073e-06
Skin_Sun_Exposed_Lower_leg.portal.eqtl:rs34060476	7	73037956	ENSG00000009950.11	MLXIPL	73038873	5.28355	0.751946	8.45647e-07	0.00049995	5.39652e-06
Artery_Tibial.portal.eqtl:rs4886649	15	75328595	ENSG00000198794.7	SCAMP5	75287873	-5.24505	-0.438684	8.50553e-07	9.999e-05	7.59796e-06
Artery_Tibial.portal.eqtl:rs12148513	15	75222225	ENSG00000198794.7	SCAMP5	75287873	-5.24368	-0.454943	8.5554e-07	9.999e-05	7.59796e-06
Adipose_Subcutaneous.portal.eqtl:rs35585307	2	61760141	ENSG00000173209.17	AHSA2	61404553	-5.29119	-0.411112	8.64249e-07	9.999e-05	3.79073e-06
Artery_Tibial.portal.eqtl:rs7588814	2	61695589	ENSG00000173209.17	AHSA2	61404553	-5.23299	-0.416497	8.95489e-07	9.999e-05	7.54981e-06
Artery_Tibial.portal.eqtl:rs2256617	2	61679924	ENSG00000173209.17	AHSA2	61404553	-5.2319	-0.416436	8.99628e-07	9.999e-05	7.54981e-06
Artery_Tibial.portal.eqtl:rs2694635	2	61676940	ENSG00000173209.17	AHSA2	61404553	-5.2319	-0.416436	8.99628e-07	9.999e-05	7.54981e-06
Artery_Tibial.portal.eqtl:rs2252662	2	61670731	ENSG00000173209.17	AHSA2	61404553	-5.23136	-0.416405	9.01707e-07	9.999e-05	7.54981e-06
Muscle_Skeletal.portal.eqtl:rs12615783	2	61440947	ENSG00000173209.17	AHSA2	61404553	5.17698	0.323522	9.09311e-07	9.999e-05	4.61373e-06
Thyroid.portal.eqtl:rs34484204	2	61774854	ENSG00000173209.17	AHSA2	61404553	-5.27454	-0.413087	9.09541e-07	9.999e-05	7.55872e-06
Esophagus_Mucosa.portal.eqtl:rs10761784	10	65308750	ENSG00000148572.10	NRBF2	64893050	-5.36568	-0.478105	9.10633e-07	0.00079992	3.75225e-06
Adipose_Subcutaneous.portal.eqtl:rs6742276	2	61768745	ENSG00000173209.17	AHSA2	61404553	-5.27776	-0.418909	9.13853e-07	9.999e-05	3.79073e-06
Artery_Tibial.portal.eqtl:rs12713436	2	61691260	ENSG00000173209.17	AHSA2	61404553	-5.22729	-0.416174	9.17498e-07	9.999e-05	7.54981e-06
Whole_Blood.portal.eqtl:rs12910558	15	75396809	ENSG00000140497.12	SCAMP2	75165706	5.12497	0.193466	9.28367e-07	0.00029997	2.17485e-06
Thyroid.portal.eqtl:rs9679557	2	61709349	ENSG00000173209.17	AHSA2	61404553	-5.26508	-0.426696	9.46064e-07	9.999e-05	7.55872e-06
Adipose_Subcutaneous.portal.eqtl:rs738816	22	24852233	ENSG00000100024.10	UPB1	24863206	-5.26612	-0.411369	9.59075e-07	0.00109989	1.89621e-06
Adipose_Subcutaneous.portal.eqtl:rs6545872	2	61724568	ENSG00000173209.17	AHSA2	61404553	-5.25787	-0.42776	9.92466e-07	9.999e-05	3.79073e-06
Whole_Blood.portal.eqtl:rs6739427	2	61452879	ENSG00000212978.5	AC016747.3	61372104	5.10944	0.310312	9.95445e-07	9.999e-05	6.63194e-06
Lung.portal.eqtl:rs34799293	15	75258773	ENSG00000198794.7	SCAMP5	75287873	-5.20329	-0.438853	1.0162e-06	0.00019998	4.81022e-06
Thyroid.portal.eqtl:rs777585	2	61412559	ENSG00000173209.17	AHSA2	61404553	-5.24519	-0.411369	1.02756e-06	9.999e-05	7.55872e-06
Artery_Tibial.portal.eqtl:rs778762	2	61782921	ENSG00000173209.17	AHSA2	61404553	-5.19742	-0.427863	1.04185e-06	9.999e-05	7.54981e-06
Thyroid.portal.eqtl:rs2441380	2	61775364	ENSG00000173209.17	AHSA2	61404553	-5.23981	-0.436011	1.05079e-06	9.999e-05	7.55872e-06
Thyroid.portal.eqtl:rs2427885	2	61816777	ENSG00000173209.17	AHSA2	61404553	-5.23735	-0.453531	1.06157e-06	9.999e-05	7.55872e-06
Whole_Blood.portal.eqtl:rs17574378	13	99116384	ENSG00000231194.1	FARP1-AS1	99088094	5.09458	0.390078	1.06404e-06	0.00029997	4.61695e-06
Thyroid.portal.eqtl:rs2592355	2	61803916	ENSG00000173209.17	AHSA2	61404553	-5.23374	-0.449533	1.07756e-06	9.999e-05	7.55872e-06
Esophagus_Mucosa.portal.eqtl:rs10740136	10	65329622	ENSG00000148572.10	NRBF2	64893050	-5.32259	-0.451263	1.08031e-06	0.00079992	3.75225e-06
Lung.portal.eqtl:rs35882241	15	75260773	ENSG00000198794.7	SCAMP5	75287873	-5.18846	-0.446282	1.0823e-06	0.00019998	4.81022e-06
Esophagus_Mucosa.portal.eqtl:rs4633333	10	65328539	ENSG00000148572.10	NRBF2	64893050	-5.322	-0.451284	1.08282e-06	0.00079992	3.75225e-06
Thyroid.portal.eqtl:rs2518933	2	61797030	ENSG00000173209.17	AHSA2	61404553	-5.23229	-0.443933	1.0841e-06	9.999e-05	7.55872e-06
Thyroid.portal.eqtl:rs2600661	2	61543081	ENSG00000173209.17	AHSA2	61404553	5.23222	0.435548	1.08438e-06	9.999e-05	7.55872e-06
Thyroid.portal.eqtl:rs2441382	2	61811480	ENSG00000173209.17	AHSA2	61404553	-5.23215	-0.452553	1.08471e-06	9.999e-05	7.55872e-06
Lung.portal.eqtl:rs4886413	15	75262310	ENSG00000198794.7	SCAMP5	75287873	-5.18664	-0.446123	1.09066e-06	0.00019998	4.81022e-06
Muscle_Skeletal.portal.eqtl:rs2694636	2	61677137	ENSG00000173209.17	AHSA2	61404553	-5.13412	-0.317788	1.09678e-06	9.999e-05	4.61373e-06
Esophagus_Mucosa.portal.eqtl:rs13095	10	64914372	ENSG00000148572.10	NRBF2	64893050	-5.31713	-0.466434	1.10392e-06	0.00079992	3.75225e-06
Esophagus_Mucosa.portal.eqtl:rs7073746	10	64904071	ENSG00000148572.10	NRBF2	64893050	-5.31713	-0.466434	1.10392e-06	0.00079992	3.75225e-06
Lung.portal.eqtl:rs35556055	15	75253414	ENSG00000198794.7	SCAMP5	75287873	-5.18225	-0.445733	1.11119e-06	0.00019998	4.81022e-06
Lung.portal.eqtl:rs62029217	15	75261899	ENSG00000198794.7	SCAMP5	75287873	-5.18225	-0.445733	1.11119e-06	0.00019998	4.81022e-06
Artery_Tibial.portal.eqtl:rs777585	2	61412559	ENSG00000173209.17	AHSA2	61404553	-5.18114	-0.417652	1.11643e-06	9.999e-05	7.54981e-06
Artery_Tibial.portal.eqtl:rs1880866	2	61698972	ENSG00000173209.17	AHSA2	61404553	-5.17957	-0.412701	1.12388e-06	9.999e-05	7.54981e-06
Skin_Sun_Exposed_Lower_leg.portal.eqtl:rs13229619	7	73030175	ENSG00000009950.11	MLXIPL	73038873	5.21478	0.74806	1.12685e-06	0.00049995	5.39652e-06
Thyroid.portal.eqtl:rs7579651	2	61800279	ENSG00000173209.17	AHSA2	61404553	-5.22145	-0.447423	1.13387e-06	9.999e-05	7.55872e-06
Adipose_Subcutaneous.portal.eqtl:rs2421331	2	61835240	ENSG00000173209.17	AHSA2	61404553	-5.22451	-0.439496	1.13942e-06	9.999e-05	3.79073e-06
Adipose_Subcutaneous.portal.eqtl:rs6545883	2	61772257	ENSG00000173209.17	AHSA2	61404553	-5.22368	-0.410805	1.1433e-06	9.999e-05	3.79073e-06
Thyroid.portal.eqtl:rs4672445	2	61655008	ENSG00000173209.17	AHSA2	61404553	5.21839	0.417056	1.14833e-06	9.999e-05	7.55872e-06
Thyroid.portal.eqtl:rs2264100	2	61670829	ENSG00000173209.17	AHSA2	61404553	-5.21816	-0.417036	1.14945e-06	9.999e-05	7.55872e-06
Thyroid.portal.eqtl:rs10190332	2	61619267	ENSG00000173209.17	AHSA2	61404553	5.21816	0.417036	1.14945e-06	9.999e-05	7.55872e-06
Thyroid.portal.eqtl:rs1900572	2	61650715	ENSG00000173209.17	AHSA2	61404553	5.21816	0.417036	1.14945e-06	9.999e-05	7.55872e-06
Thyroid.portal.eqtl:rs2593627	2	61618574	ENSG00000173209.17	AHSA2	61404553	5.21816	0.417036	1.14945e-06	9.999e-05	7.55872e-06
Thyroid.portal.eqtl:rs6545867	2	61651027	ENSG00000173209.17	AHSA2	61404553	5.21816	0.417036	1.14945e-06	9.999e-05	7.55872e-06
Thyroid.portal.eqtl:rs2593625	2	61668769	ENSG00000173209.17	AHSA2	61404553	-5.21803	-0.417131	1.15008e-06	9.999e-05	7.55872e-06
Thyroid.portal.eqtl:rs6545871	2	61692203	ENSG00000173209.17	AHSA2	61404553	-5.21722	-0.416953	1.15393e-06	9.999e-05	7.55872e-06
Adipose_Subcutaneous.portal.eqtl:rs778762	2	61782921	ENSG00000173209.17	AHSA2	61404553	-5.22051	-0.424769	1.1584e-06	9.999e-05	3.79073e-06
Thyroid.portal.eqtl:rs7560978	2	61619588	ENSG00000173209.17	AHSA2	61404553	5.21566	0.41698	1.16142e-06	9.999e-05	7.55872e-06
Artery_Tibial.portal.eqtl:rs6742276	2	61768745	ENSG00000173209.17	AHSA2	61404553	-5.17092	-0.414236	1.16587e-06	9.999e-05	7.54981e-06
Thyroid.portal.eqtl:rs13003376	2	61691440	ENSG00000173209.17	AHSA2	61404553	-5.21042	-0.410923	1.18686e-06	9.999e-05	7.55872e-06
Muscle_Skeletal.portal.eqtl:rs4672425	2	61444998	ENSG00000173209.17	AHSA2	61404553	5.11222	0.317989	1.20664e-06	9.999e-05	4.61373e-06
Adipose_Subcutaneous.portal.eqtl:rs2421207	2	61769405	ENSG00000173209.17	AHSA2	61404553	-5.20995	-0.417964	1.21002e-06	9.999e-05	3.79073e-06
Muscle_Skeletal.portal.eqtl:rs2442031	2	61613785	ENSG00000173209.17	AHSA2	61404553	5.11009	0.318282	1.21787e-06	9.999e-05	4.61373e-06
Nerve_Tibial.portal.eqtl:rs2630395	1	72577177	ENSG00000227207.2	RP11-292O17.1	72767155	5.25088	0.574534	1.21928e-06	0.00019998	2.36851e-06
Thyroid.portal.eqtl:rs13023037	2	61620989	ENSG00000173209.17	AHSA2	61404553	5.2034	0.417533	1.22186e-06	9.999e-05	7.55872e-06
Esophagus_Mucosa.portal.eqtl:rs2393986	10	65320006	ENSG00000148572.10	NRBF2	64893050	-5.2898	-0.467288	1.22983e-06	0.00079992	3.75225e-06
Adipose_Subcutaneous.portal.eqtl:rs2427884	2	61775369	ENSG00000173209.17	AHSA2	61404553	-5.20417	-0.408238	1.23925e-06	9.999e-05	3.79073e-06
Muscle_Skeletal.portal.eqtl:rs2950268	2	61615763	ENSG00000173209.17	AHSA2	61404553	5.10524	0.31794	1.24382e-06	9.999e-05	4.61373e-06
Muscle_Skeletal.portal.eqtl:rs2442034	2	61615667	ENSG00000173209.17	AHSA2	61404553	5.10476	0.317941	1.24642e-06	9.999e-05	4.61373e-06
Muscle_Skeletal.portal.eqtl:rs2694625	2	61616055	ENSG00000173209.17	AHSA2	61404553	5.10461	0.317895	1.24727e-06	9.999e-05	4.61373e-06
Thyroid.portal.eqtl:rs4671399	2	61458518	ENSG00000173209.17	AHSA2	61404553	5.1954	0.410632	1.26297e-06	9.999e-05	7.55872e-06
Thyroid.portal.eqtl:rs4672426	2	61457148	ENSG00000173209.17	AHSA2	61404553	5.1954	0.410632	1.26297e-06	9.999e-05	7.55872e-06
Thyroid.portal.eqtl:rs6545848	2	61461183	ENSG00000173209.17	AHSA2	61404553	5.1954	0.410632	1.26297e-06	9.999e-05	7.55872e-06
Muscle_Skeletal.portal.eqtl:rs778154	2	61646631	ENSG00000173209.17	AHSA2	61404553	5.09976	0.317541	1.27384e-06	9.999e-05	4.61373e-06
Muscle_Skeletal.portal.eqtl:rs778141	2	61682178	ENSG00000173209.17	AHSA2	61404553	-5.09967	-0.31752	1.27433e-06	9.999e-05	4.61373e-06
Muscle_Skeletal.portal.eqtl:rs1186697	2	61661417	ENSG00000173209.17	AHSA2	61404553	-5.0996	-0.317525	1.27471e-06	9.999e-05	4.61373e-06
Muscle_Skeletal.portal.eqtl:rs2256615	2	61679894	ENSG00000173209.17	AHSA2	61404553	-5.09959	-0.317526	1.27476e-06	9.999e-05	4.61373e-06
Muscle_Skeletal.portal.eqtl:rs796597	2	61681060	ENSG00000173209.17	AHSA2	61404553	-5.09959	-0.317526	1.27476e-06	9.999e-05	4.61373e-06
Muscle_Skeletal.portal.eqtl:rs2463100	2	61659199	ENSG00000173209.17	AHSA2	61404553	5.09953	0.31753	1.27511e-06	9.999e-05	4.61373e-06
Muscle_Skeletal.portal.eqtl:rs4430924	2	61703856	ENSG00000173209.17	AHSA2	61404553	-5.0995	-0.317532	1.2753e-06	9.999e-05	4.61373e-06
Muscle_Skeletal.portal.eqtl:rs778155	2	61647901	ENSG00000173209.17	AHSA2	61404553	5.0995	0.317532	1.2753e-06	9.999e-05	4.61373e-06
Muscle_Skeletal.portal.eqtl:rs778140	2	61682976	ENSG00000173209.17	AHSA2	61404553	-5.09927	-0.317533	1.27657e-06	9.999e-05	4.61373e-06
Muscle_Skeletal.portal.eqtl:rs2121660	2	61653058	ENSG00000173209.17	AHSA2	61404553	5.09898	0.317517	1.27814e-06	9.999e-05	4.61373e-06
Muscle_Skeletal.portal.eqtl:rs2442029	2	61679552	ENSG00000173209.17	AHSA2	61404553	-5.0989	-0.317512	1.2786e-06	9.999e-05	4.61373e-06
Muscle_Skeletal.portal.eqtl:rs778142	2	61681428	ENSG00000173209.17	AHSA2	61404553	-5.09606	-0.317373	1.29446e-06	9.999e-05	4.61373e-06
Adipose_Subcutaneous.portal.eqtl:rs9624479	22	24868589	ENSG00000100024.10	UPB1	24863206	-5.19322	-0.40542	1.29646e-06	0.00109989	1.89621e-06
Adipose_Subcutaneous.portal.eqtl:rs1562309	2	61770126	ENSG00000173209.17	AHSA2	61404553	-5.19068	-0.428818	1.31013e-06	9.999e-05	3.79073e-06
Adipose_Subcutaneous.portal.eqtl:rs5760435	22	24858500	ENSG00000100024.10	UPB1	24863206	-5.18953	-0.407612	1.31635e-06	0.00109989	1.89621e-06
Muscle_Skeletal.portal.eqtl:rs1186711	2	61688505	ENSG00000173209.17	AHSA2	61404553	-5.09208	-0.317216	1.31703e-06	9.999e-05	4.61373e-06
Muscle_Skeletal.portal.eqtl:rs12713439	2	61752154	ENSG00000173209.17	AHSA2	61404553	-5.09201	-0.322737	1.31744e-06	9.999e-05	4.61373e-06
Muscle_Skeletal.portal.eqtl:rs2305156	2	61729268	ENSG00000173209.17	AHSA2	61404553	-5.09201	-0.322737	1.31744e-06	9.999e-05	4.61373e-06
Muscle_Skeletal.portal.eqtl:rs3732170	2	61749716	ENSG00000173209.17	AHSA2	61404553	-5.09201	-0.322737	1.31744e-06	9.999e-05	4.61373e-06
Muscle_Skeletal.portal.eqtl:rs6545877	2	61741947	ENSG00000173209.17	AHSA2	61404553	-5.09201	-0.322737	1.31744e-06	9.999e-05	4.61373e-06
Muscle_Skeletal.portal.eqtl:rs7421663	2	61753786	ENSG00000173209.17	AHSA2	61404553	-5.09201	-0.322737	1.31744e-06	9.999e-05	4.61373e-06
Muscle_Skeletal.portal.eqtl:rs7606167	2	61742654	ENSG00000173209.17	AHSA2	61404553	-5.09201	-0.322737	1.31744e-06	9.999e-05	4.61373e-06
Muscle_Skeletal.portal.eqtl:rs9309336	2	61763165	ENSG00000173209.17	AHSA2	61404553	-5.09201	-0.322737	1.31744e-06	9.999e-05	4.61373e-06
Muscle_Skeletal.portal.eqtl:rs9989775	2	61761774	ENSG00000173209.17	AHSA2	61404553	-5.09201	-0.322737	1.31744e-06	9.999e-05	4.61373e-06
Muscle_Skeletal.portal.eqtl:rs11125885	2	61755728	ENSG00000173209.17	AHSA2	61404553	-5.09189	-0.322734	1.31816e-06	9.999e-05	4.61373e-06
Lung.portal.eqtl:rs660745	19	49219459	ENSG00000176920.10	FUT2	49199228	-5.13917	-0.406128	1.33349e-06	0.00019998	2.4481e-06
Esophagus_Mucosa.portal.eqtl:rs380743	19	49241014	ENSG00000105538.4	RASIP1	49243978	5.26925	0.605586	1.33376e-06	0.00049995	2.09513e-06
Muscle_Skeletal.portal.eqtl:rs2600661	2	61543081	ENSG00000173209.17	AHSA2	61404553	5.08898	0.327217	1.33487e-06	9.999e-05	4.61373e-06
Thyroid.portal.eqtl:rs2694634	2	61551435	ENSG00000173209.17	AHSA2	61404553	5.17947	0.415848	1.34884e-06	9.999e-05	7.55872e-06
Thyroid.portal.eqtl:rs7572603	2	61552145	ENSG00000173209.17	AHSA2	61404553	5.17939	0.415841	1.34927e-06	9.999e-05	7.55872e-06
Thyroid.portal.eqtl:rs778157	2	61554289	ENSG00000173209.17	AHSA2	61404553	5.17923	0.415828	1.35014e-06	9.999e-05	7.55872e-06
Thyroid.portal.eqtl:rs778158	2	61555421	ENSG00000173209.17	AHSA2	61404553	5.17916	0.415821	1.35058e-06	9.999e-05	7.55872e-06
Thyroid.portal.eqtl:rs507766	19	49208543	ENSG00000142233.7	NTN5	49176338	5.17914	0.328509	1.35065e-06	0.00039996	2.67583e-06
Whole_Blood.portal.eqtl:rs17574378	13	99116384	ENSG00000152767.11	FARP1	98794816	5.03972	0.334325	1.35932e-06	9.999e-05	3.23607e-06
Thyroid.portal.eqtl:rs503279	19	49209010	ENSG00000142233.7	NTN5	49176338	5.17647	0.328359	1.36565e-06	0.00039996	2.67583e-06
Thyroid.portal.eqtl:rs504963	19	49208865	ENSG00000142233.7	NTN5	49176338	5.17647	0.328359	1.36565e-06	0.00039996	2.67583e-06
Thyroid.portal.eqtl:rs506897	19	49208629	ENSG00000142233.7	NTN5	49176338	5.17647	0.328359	1.36565e-06	0.00039996	2.67583e-06
Thyroid.portal.eqtl:rs507711	19	49208564	ENSG00000142233.7	NTN5	49176338	5.17647	0.328359	1.36565e-06	0.00039996	2.67583e-06
Thyroid.portal.eqtl:rs569970	19	49207718	ENSG00000142233.7	NTN5	49176338	5.17647	0.328359	1.36565e-06	0.00039996	2.67583e-06
Thyroid.portal.eqtl:rs570794	19	49207651	ENSG00000142233.7	NTN5	49176338	5.17647	0.328359	1.36565e-06	0.00039996	2.67583e-06
Esophagus_Mucosa.portal.eqtl:rs11667321	19	49250538	ENSG00000182264.4	IZUMO1	49250166	-5.26324	-0.631794	1.36573e-06	9.999e-05	1.9882e-06
Esophagus_Mucosa.portal.eqtl:rs8106205	19	49250197	ENSG00000182264.4	IZUMO1	49250166	-5.26324	-0.631794	1.36573e-06	9.999e-05	1.9882e-06
Esophagus_Mucosa.portal.eqtl:rs281379	19	49214274	ENSG00000105538.4	RASIP1	49243978	5.263	0.579514	1.36701e-06	0.00049995	2.09513e-06
Muscle_Skeletal.portal.eqtl:rs11678419	2	61743377	ENSG00000173209.17	AHSA2	61404553	-5.08063	-0.322658	1.38418e-06	9.999e-05	4.61373e-06
Adipose_Subcutaneous.portal.eqtl:rs4822493	22	24870064	ENSG00000100024.10	UPB1	24863206	-5.17583	-0.40466	1.39274e-06	0.00109989	1.89621e-06
Adipose_Subcutaneous.portal.eqtl:rs1547358	22	24878430	ENSG00000100024.10	UPB1	24863206	-5.17578	-0.404646	1.39298e-06	0.00109989	1.89621e-06
Adipose_Subcutaneous.portal.eqtl:rs4822494	22	24870126	ENSG00000100024.10	UPB1	24863206	-5.17578	-0.404646	1.39298e-06	0.00109989	1.89621e-06
Adipose_Subcutaneous.portal.eqtl:rs4822500	22	24881233	ENSG00000100024.10	UPB1	24863206	-5.17578	-0.404646	1.39298e-06	0.00109989	1.89621e-06
Adipose_Subcutaneous.portal.eqtl:rs5760446	22	24878804	ENSG00000100024.10	UPB1	24863206	-5.17578	-0.404646	1.39298e-06	0.00109989	1.89621e-06
Adipose_Subcutaneous.portal.eqtl:rs5760452	22	24885223	ENSG00000100024.10	UPB1	24863206	-5.17578	-0.404646	1.39298e-06	0.00109989	1.89621e-06
Adipose_Subcutaneous.portal.eqtl:rs9612627	22	24856329	ENSG00000100024.10	UPB1	24863206	-5.17559	-0.406395	1.39409e-06	0.00109989	1.89621e-06
Thyroid.portal.eqtl:rs692854	19	49209464	ENSG00000142233.7	NTN5	49176338	5.17141	0.328323	1.39445e-06	0.00039996	2.67583e-06
Lung.portal.eqtl:rs676388	19	49211969	ENSG00000176920.10	FUT2	49199228	-5.12678	-0.412847	1.4051e-06	0.00019998	2.4481e-06
Adipose_Subcutaneous.portal.eqtl:rs1008931	22	24855541	ENSG00000100024.10	UPB1	24863206	-5.17048	-0.405946	1.42371e-06	0.00109989	1.89621e-06
Thyroid.portal.eqtl:rs571689	19	49207554	ENSG00000142233.7	NTN5	49176338	5.1643	0.329495	1.43588e-06	0.00039996	2.67583e-06
Muscle_Skeletal.portal.eqtl:rs12148513	15	75222225	ENSG00000138621.7	PPCDC	75315896	-5.07206	-0.334355	1.43655e-06	0.00139986	4.36462e-06
Adipose_Subcutaneous.portal.eqtl:rs5760454	22	24886476	ENSG00000100024.10	UPB1	24863206	-5.16259	-0.404743	1.47064e-06	0.00109989	1.89621e-06
Thyroid.portal.eqtl:rs646327	19	49209851	ENSG00000142233.7	NTN5	49176338	5.15833	0.328073	1.47168e-06	0.00039996	2.67583e-06
Muscle_Skeletal.portal.eqtl:rs6709441	2	61436930	ENSG00000173209.17	AHSA2	61404553	5.0642	0.316611	1.48625e-06	9.999e-05	4.61373e-06
Skin_Sun_Exposed_Lower_leg.portal.eqtl:rs34346326	7	73016181	ENSG00000009950.11	MLXIPL	73038873	5.14729	0.646958	1.49087e-06	0.00049995	5.39652e-06
Whole_Blood.portal.eqtl:rs2518932	2	61801277	ENSG00000212978.5	AC016747.3	61372104	-5.01893	-0.314579	1.49088e-06	9.999e-05	6.63194e-06
Skin_Sun_Exposed_Lower_leg.portal.eqtl:rs35368205	7	73017657	ENSG00000009950.11	MLXIPL	73038873	5.14579	0.64672	1.50017e-06	0.00049995	5.39652e-06
Adipose_Subcutaneous.portal.eqtl:rs13413337	2	61747123	ENSG00000173209.17	AHSA2	61404553	-5.15277	-0.40396	1.53118e-06	9.999e-05	3.79073e-06
Adipose_Subcutaneous.portal.eqtl:rs5760448	22	24882187	ENSG00000100024.10	UPB1	24863206	-5.15253	-0.406415	1.53268e-06	0.00109989	1.89621e-06
Thyroid.portal.eqtl:rs1465042	2	61572322	ENSG00000173209.17	AHSA2	61404553	5.14668	0.40595	1.54394e-06	9.999e-05	7.55872e-06
Nerve_Tibial.portal.eqtl:rs2821239	1	72590193	ENSG00000227207.2	RP11-292O17.1	72767155	5.19146	0.589451	1.5487e-06	0.00019998	2.36851e-06
Esophagus_Mucosa.portal.eqtl:rs28400014	19	49250657	ENSG00000182264.4	IZUMO1	49250166	-5.22722	-0.628047	1.57376e-06	9.999e-05	1.9882e-06
Artery_Tibial.portal.eqtl:rs2441381	2	61798829	ENSG00000173209.17	AHSA2	61404553	-5.09654	-0.416047	1.59603e-06	9.999e-05	7.54981e-06
Whole_Blood.portal.eqtl:rs2441381	2	61798829	ENSG00000212978.5	AC016747.3	61372104	-5.00136	-0.312666	1.61155e-06	9.999e-05	6.63194e-06
Adipose_Subcutaneous.portal.eqtl:rs1838978	2	61540923	ENSG00000173209.17	AHSA2	61404553	5.14022	0.427138	1.61208e-06	9.999e-05	3.79073e-06
Skin_Sun_Exposed_Lower_leg.portal.eqtl:rs56383788	7	73016400	ENSG00000009950.11	MLXIPL	73038873	5.12612	0.647344	1.62714e-06	0.00049995	5.39652e-06
Whole_Blood.portal.eqtl:rs777591	2	61417617	ENSG00000212978.5	AC016747.3	61372104	-4.99578	-0.300654	1.6519e-06	9.999e-05	6.63194e-06
Adipose_Subcutaneous.portal.eqtl:rs778767	2	61787028	ENSG00000173209.17	AHSA2	61404553	-5.13418	-0.414307	1.65253e-06	9.999e-05	3.79073e-06
Thyroid.portal.eqtl:rs6705235	2	61713580	ENSG00000173209.17	AHSA2	61404553	-5.12629	-0.411199	1.67892e-06	9.999e-05	7.55872e-06
Thyroid.portal.eqtl:rs3821222	2	61713526	ENSG00000173209.17	AHSA2	61404553	-5.12586	-0.411141	1.68191e-06	9.999e-05	7.55872e-06
Artery_Tibial.portal.eqtl:rs2518932	2	61801277	ENSG00000173209.17	AHSA2	61404553	-5.08347	-0.415445	1.68615e-06	9.999e-05	7.54981e-06
Thyroid.portal.eqtl:rs6748003	2	61806700	ENSG00000173209.17	AHSA2	61404553	-5.12275	-0.456454	1.70352e-06	9.999e-05	7.55872e-06
Adipose_Subcutaneous.portal.eqtl:rs778758	2	61782161	ENSG00000173209.17	AHSA2	61404553	-5.12667	-0.424299	1.70418e-06	9.999e-05	3.79073e-06
Thyroid.portal.eqtl:rs2421207	2	61769405	ENSG00000173209.17	AHSA2	61404553	-5.12203	-0.417052	1.70854e-06	9.999e-05	7.55872e-06
Adipose_Subcutaneous.portal.eqtl:rs9807965	2	61732159	ENSG00000173209.17	AHSA2	61404553	-5.12004	-0.410509	1.75105e-06	9.999e-05	3.79073e-06
Muscle_Skeletal.portal.eqtl:rs7602859	2	61458206	ENSG00000173209.17	AHSA2	61404553	5.02239	0.314326	1.78038e-06	9.999e-05	4.61373e-06
Thyroid.portal.eqtl:rs11887205	2	61774473	ENSG00000173209.17	AHSA2	61404553	-5.10829	-0.426097	1.80758e-06	9.999e-05	7.55872e-06
Thyroid.portal.eqtl:rs12713439	2	61752154	ENSG00000173209.17	AHSA2	61404553	-5.10829	-0.426097	1.80758e-06	9.999e-05	7.55872e-06
Thyroid.portal.eqtl:rs1562308	2	61768421	ENSG00000173209.17	AHSA2	61404553	-5.10829	-0.426097	1.80758e-06	9.999e-05	7.55872e-06
Thyroid.portal.eqtl:rs2305156	2	61729268	ENSG00000173209.17	AHSA2	61404553	-5.10829	-0.426097	1.80758e-06	9.999e-05	7.55872e-06
Thyroid.portal.eqtl:rs3732170	2	61749716	ENSG00000173209.17	AHSA2	61404553	-5.10829	-0.426097	1.80758e-06	9.999e-05	7.55872e-06
Thyroid.portal.eqtl:rs3771258	2	61764140	ENSG00000173209.17	AHSA2	61404553	-5.10829	-0.426097	1.80758e-06	9.999e-05	7.55872e-06
Thyroid.portal.eqtl:rs6545877	2	61741947	ENSG00000173209.17	AHSA2	61404553	-5.10829	-0.426097	1.80758e-06	9.999e-05	7.55872e-06
Thyroid.portal.eqtl:rs7421663	2	61753786	ENSG00000173209.17	AHSA2	61404553	-5.10829	-0.426097	1.80758e-06	9.999e-05	7.55872e-06
Thyroid.portal.eqtl:rs7606167	2	61742654	ENSG00000173209.17	AHSA2	61404553	-5.10829	-0.426097	1.80758e-06	9.999e-05	7.55872e-06
Thyroid.portal.eqtl:rs778752	2	61776902	ENSG00000173209.17	AHSA2	61404553	-5.10829	-0.426097	1.80758e-06	9.999e-05	7.55872e-06
Thyroid.portal.eqtl:rs9309336	2	61763165	ENSG00000173209.17	AHSA2	61404553	-5.10829	-0.426097	1.80758e-06	9.999e-05	7.55872e-06
Thyroid.portal.eqtl:rs9989775	2	61761774	ENSG00000173209.17	AHSA2	61404553	-5.10829	-0.426097	1.80758e-06	9.999e-05	7.55872e-06
Thyroid.portal.eqtl:rs507855	19	49208501	ENSG00000142233.7	NTN5	49176338	5.10815	0.329114	1.80868e-06	0.00039996	2.67583e-06
Thyroid.portal.eqtl:rs11125885	2	61755728	ENSG00000173209.17	AHSA2	61404553	-5.1081	-0.426093	1.809e-06	9.999e-05	7.55872e-06
Adipose_Subcutaneous.portal.eqtl:rs7563678	2	61741811	ENSG00000173209.17	AHSA2	61404553	-5.11065	-0.409962	1.81966e-06	9.999e-05	3.79073e-06
Adipose_Subcutaneous.portal.eqtl:rs6734830	2	61731112	ENSG00000173209.17	AHSA2	61404553	-5.11019	-0.409929	1.82304e-06	9.999e-05	3.79073e-06
Esophagus_Mucosa.portal.eqtl:rs281377	19	49206603	ENSG00000105538.4	RASIP1	49243978	-5.18897	-0.52866	1.82872e-06	0.00049995	2.09513e-06
Thyroid.portal.eqtl:rs778768	2	61790289	ENSG00000173209.17	AHSA2	61404553	-5.10404	-0.425818	1.83937e-06	9.999e-05	7.55872e-06
Adipose_Subcutaneous.portal.eqtl:rs3761422	22	24826672	ENSG00000100024.10	UPB1	24863206	-5.10675	-0.397568	1.8489e-06	0.00109989	1.89621e-06
Adipose_Subcutaneous.portal.eqtl:rs1008932	22	24855182	ENSG00000100024.10	UPB1	24863206	-5.10502	-0.397335	1.86201e-06	0.00109989	1.89621e-06
Adipose_Subcutaneous.portal.eqtl:rs1548302	22	24879557	ENSG00000100024.10	UPB1	24863206	-5.10502	-0.397335	1.86201e-06	0.00109989	1.89621e-06
Adipose_Subcutaneous.portal.eqtl:rs2032115	22	24869659	ENSG00000100024.10	UPB1	24863206	-5.10502	-0.397335	1.86201e-06	0.00109989	1.89621e-06
Adipose_Subcutaneous.portal.eqtl:rs4822501	22	24881685	ENSG00000100024.10	UPB1	24863206	-5.10502	-0.397335	1.86201e-06	0.00109989	1.89621e-06
Adipose_Subcutaneous.portal.eqtl:rs5760440	22	24865187	ENSG00000100024.10	UPB1	24863206	-5.10502	-0.397335	1.86201e-06	0.00109989	1.89621e-06
Adipose_Subcutaneous.portal.eqtl:rs5760441	22	24871831	ENSG00000100024.10	UPB1	24863206	-5.10502	-0.397335	1.86201e-06	0.00109989	1.89621e-06
Adipose_Subcutaneous.portal.eqtl:rs5760447	22	24879289	ENSG00000100024.10	UPB1	24863206	-5.10502	-0.397335	1.86201e-06	0.00109989	1.89621e-06
Adipose_Subcutaneous.portal.eqtl:rs738813	22	24862738	ENSG00000100024.10	UPB1	24863206	-5.10502	-0.397335	1.86201e-06	0.00109989	1.89621e-06
Adipose_Subcutaneous.portal.eqtl:rs9620391	22	24875123	ENSG00000100024.10	UPB1	24863206	-5.10502	-0.397335	1.86201e-06	0.00109989	1.89621e-06
Esophagus_Mucosa.portal.eqtl:rs10822153	10	65056813	ENSG00000148572.10	NRBF2	64893050	-5.18331	-0.460115	1.86975e-06	0.00079992	3.75225e-06
Adipose_Subcutaneous.portal.eqtl:rs12713438	2	61725501	ENSG00000173209.17	AHSA2	61404553	-5.10258	-0.404343	1.88068e-06	9.999e-05	3.79073e-06
Thyroid.portal.eqtl:rs11678419	2	61743377	ENSG00000173209.17	AHSA2	61404553	-5.0951	-0.426276	1.90799e-06	9.999e-05	7.55872e-06
Thyroid.portal.eqtl:rs6545872	2	61724568	ENSG00000173209.17	AHSA2	61404553	-5.0935	-0.421979	1.92054e-06	9.999e-05	7.55872e-06
Muscle_Skeletal.portal.eqtl:rs7557230	2	61736652	ENSG00000173209.17	AHSA2	61404553	-5.00237	-0.318312	1.94049e-06	9.999e-05	4.61373e-06
Adipose_Subcutaneous.portal.eqtl:rs6718887	2	61727215	ENSG00000173209.17	AHSA2	61404553	-5.09434	-0.408983	1.94506e-06	9.999e-05	3.79073e-06
Whole_Blood.portal.eqtl:rs61971239	13	99241949	ENSG00000152767.11	FARP1	98794816	4.95814	0.382346	1.95042e-06	9.999e-05	3.23607e-06
Lung.portal.eqtl:rs12979278	19	49218602	ENSG00000176920.10	FUT2	49199228	-5.04722	-0.3953	1.96287e-06	0.00019998	2.4481e-06
Thyroid.portal.eqtl:rs778763	2	61785639	ENSG00000173209.17	AHSA2	61404553	-5.08717	-0.42533	1.97095e-06	9.999e-05	7.55872e-06
Thyroid.portal.eqtl:rs2177961	2	61560264	ENSG00000173209.17	AHSA2	61404553	5.08405	0.426981	1.99625e-06	9.999e-05	7.55872e-06
Artery_Tibial.portal.eqtl:rs766447	2	61735569	ENSG00000173209.17	AHSA2	61404553	-5.04209	-0.415681	2.00543e-06	9.999e-05	7.54981e-06
Lung.portal.eqtl:rs34307821	15	75256826	ENSG00000198794.7	SCAMP5	75287873	-5.04138	-0.434557	2.01142e-06	0.00019998	4.81022e-06
Whole_Blood.portal.eqtl:rs4411372	13	99130423	ENSG00000152767.11	FARP1	98794816	4.94782	0.344423	2.041e-06	9.999e-05	3.23607e-06
Nerve_Tibial.portal.eqtl:rs2630406	1	72590865	ENSG00000227207.2	RP11-292O17.1	72767155	5.12191	0.585125	2.04603e-06	0.00019998	2.36851e-06
Skin_Sun_Exposed_Lower_leg.portal.eqtl:rs13240994	7	73016862	ENSG00000009950.11	MLXIPL	73038873	5.0704	0.632482	2.04647e-06	0.00049995	5.39652e-06
Whole_Blood.portal.eqtl:rs777589	2	61425621	ENSG00000212978.5	AC016747.3	61372104	-4.94663	-0.300895	2.0517e-06	9.999e-05	6.63194e-06
Thyroid.portal.eqtl:rs777590	2	61417145	ENSG00000173209.17	AHSA2	61404553	-5.06804	-0.399981	2.13118e-06	9.999e-05	7.55872e-06
Adipose_Subcutaneous.portal.eqtl:rs8061772	16	30119525	ENSG00000261367.1	RP11-455F5.4	30118996	-5.07122	-0.974371	2.1374e-06	0.00178791	6.39714e-06
Thyroid.portal.eqtl:rs4325736	2	61830144	ENSG00000173209.17	AHSA2	61404553	-5.06584	-0.439632	2.15042e-06	9.999e-05	7.55872e-06
Whole_Blood.portal.eqtl:rs61971236	13	99241749	ENSG00000152767.11	FARP1	98794816	4.93548	0.379734	2.15466e-06	9.999e-05	3.23607e-06
Whole_Blood.portal.eqtl:rs61971237	13	99241854	ENSG00000152767.11	FARP1	98794816	4.93548	0.379734	2.15466e-06	9.999e-05	3.23607e-06
Whole_Blood.portal.eqtl:rs11839260	13	99242413	ENSG00000152767.11	FARP1	98794816	4.92994	0.379504	2.20772e-06	9.999e-05	3.23607e-06
Esophagus_Mucosa.portal.eqtl:rs7920058	10	65293924	ENSG00000148572.10	NRBF2	64893050	-5.13997	-0.460633	2.21512e-06	0.00079992	3.75225e-06
Muscle_Skeletal.portal.eqtl:rs12713437	2	61722904	ENSG00000173209.17	AHSA2	61404553	-4.96648	-0.315149	2.2634e-06	9.999e-05	4.61373e-06
Muscle_Skeletal.portal.eqtl:rs12473030	2	61720497	ENSG00000173209.17	AHSA2	61404553	-4.96635	-0.315133	2.26463e-06	9.999e-05	4.61373e-06
Thyroid.portal.eqtl:rs2592358	2	61813377	ENSG00000173209.17	AHSA2	61404553	-5.05298	-0.436704	2.26623e-06	9.999e-05	7.55872e-06
Muscle_Skeletal.portal.eqtl:rs12612677	2	61729695	ENSG00000173209.17	AHSA2	61404553	-4.96319	-0.322452	2.29542e-06	9.999e-05	4.61373e-06
Whole_Blood.portal.eqtl:rs777590	2	61417145	ENSG00000212978.5	AC016747.3	61372104	-4.92078	-0.305165	2.29811e-06	9.999e-05	6.63194e-06
Artery_Tibial.portal.eqtl:rs2518937	2	61791954	ENSG00000173209.17	AHSA2	61404553	-5.00472	-0.418478	2.3439e-06	9.999e-05	7.54981e-06
Whole_Blood.portal.eqtl:rs4671399	2	61458518	ENSG00000212978.5	AC016747.3	61372104	4.91373	0.297934	2.37024e-06	9.999e-05	6.63194e-06
Whole_Blood.portal.eqtl:rs4672426	2	61457148	ENSG00000212978.5	AC016747.3	61372104	4.91373	0.297934	2.37024e-06	9.999e-05	6.63194e-06
Whole_Blood.portal.eqtl:rs6545845	2	61437044	ENSG00000212978.5	AC016747.3	61372104	4.91341	0.301091	2.37348e-06	9.999e-05	6.63194e-06
Esophagus_Mucosa.portal.eqtl:rs7920036	10	65293860	ENSG00000148572.10	NRBF2	64893050	-5.12062	-0.459215	2.38886e-06	0.00079992	3.75225e-06
Artery_Tibial.portal.eqtl:rs11887205	2	61774473	ENSG00000173209.17	AHSA2	61404553	-4.99812	-0.412107	2.40918e-06	9.999e-05	7.54981e-06
Whole_Blood.portal.eqtl:rs61968461	13	99242959	ENSG00000152767.11	FARP1	98794816	4.90883	0.378572	2.42158e-06	9.999e-05	3.23607e-06
Esophagus_Mucosa.portal.eqtl:rs7085018	10	65286667	ENSG00000148572.10	NRBF2	64893050	-5.11478	-0.458776	2.44384e-06	0.00079992	3.75225e-06
Thyroid.portal.eqtl:rs7557230	2	61736652	ENSG00000173209.17	AHSA2	61404553	-5.03417	-0.419839	2.44673e-06	9.999e-05	7.55872e-06
Thyroid.portal.eqtl:rs13234805	7	73049182	ENSG00000009950.11	MLXIPL	73038873	5.02548	0.789002	2.53483e-06	9.999e-05	7.96634e-06
Artery_Tibial.portal.eqtl:rs12986713	2	61740646	ENSG00000173209.17	AHSA2	61404553	-4.98545	-0.414661	2.53963e-06	9.999e-05	7.54981e-06
Adipose_Subcutaneous.portal.eqtl:rs2518932	2	61801277	ENSG00000173209.17	AHSA2	61404553	-5.02865	-0.427162	2.54132e-06	9.999e-05	3.79073e-06
Muscle_Skeletal.portal.eqtl:rs4788415	16	30439309	ENSG00000177238.9	TRIM72	31225342	-4.93437	-0.75306	2.59606e-06	0.0036943	3.84071e-06
Thyroid.portal.eqtl:rs12612677	2	61729695	ENSG00000173209.17	AHSA2	61404553	-5.01535	-0.42668	2.64137e-06	9.999e-05	7.55872e-06
Adipose_Subcutaneous.portal.eqtl:rs2441381	2	61798829	ENSG00000173209.17	AHSA2	61404553	-5.01569	-0.42493	2.67854e-06	9.999e-05	3.79073e-06
Esophagus_Mucosa.portal.eqtl:rs3956912	10	65205881	ENSG00000148572.10	NRBF2	64893050	-5.08863	-0.448018	2.70572e-06	0.00079992	3.75225e-06
Esophagus_Mucosa.portal.eqtl:rs12148513	15	75222225	ENSG00000140497.12	SCAMP2	75165706	5.08598	0.476896	2.73373e-06	0.00019998	5.96951e-06
Thyroid.portal.eqtl:rs5751882	22	24864914	ENSG00000100024.10	UPB1	24863206	-5.00579	-0.470155	2.74591e-06	0.00542557	4.15407e-06
Muscle_Skeletal.portal.eqtl:rs2593633	2	61571513	ENSG00000173209.17	AHSA2	61404553	4.91943	0.303089	2.7666e-06	9.999e-05	4.61373e-06
Muscle_Skeletal.portal.eqtl:rs2463102	2	61571295	ENSG00000173209.17	AHSA2	61404553	4.91823	0.303122	2.78074e-06	9.999e-05	4.61373e-06
Esophagus_Mucosa.portal.eqtl:rs10822164	10	65127258	ENSG00000148572.10	NRBF2	64893050	-5.07802	-0.469327	2.81964e-06	0.00079992	3.75225e-06
Thyroid.portal.eqtl:rs34482346	7	72915521	ENSG00000009950.11	MLXIPL	73038873	4.9969	0.809442	2.84676e-06	9.999e-05	7.96634e-06
Skin_Sun_Exposed_Lower_leg.portal.eqtl:rs33951980	7	73029437	ENSG00000009950.11	MLXIPL	73038873	4.98508	0.725661	2.90033e-06	0.00049995	5.39652e-06
Adipose_Subcutaneous.portal.eqtl:rs7579651	2	61800279	ENSG00000173209.17	AHSA2	61404553	-4.99191	-0.432338	2.9492e-06	9.999e-05	3.79073e-06
Thyroid.portal.eqtl:rs799165	7	73052057	ENSG00000009950.11	MLXIPL	73038873	4.98733	0.789569	2.95936e-06	9.999e-05	7.96634e-06
Artery_Tibial.portal.eqtl:rs2518933	2	61797030	ENSG00000173209.17	AHSA2	61404553	-4.94728	-0.414935	2.97522e-06	9.999e-05	7.54981e-06
Adipose_Subcutaneous.portal.eqtl:rs12986713	2	61740646	ENSG00000173209.17	AHSA2	61404553	-4.98704	-0.421484	3.00777e-06	9.999e-05	3.79073e-06
Thyroid.portal.eqtl:rs79862839	7	72921609	ENSG00000009950.11	MLXIPL	73038873	4.98054	0.795816	3.04189e-06	9.999e-05	7.96634e-06
Thyroid.portal.eqtl:rs12473030	2	61720497	ENSG00000173209.17	AHSA2	61404553	-4.97992	-0.416092	3.04944e-06	9.999e-05	7.55872e-06
Artery_Tibial.portal.eqtl:rs778758	2	61782161	ENSG00000173209.17	AHSA2	61404553	-4.9409	-0.414755	3.05491e-06	9.999e-05	7.54981e-06
Thyroid.portal.eqtl:rs12713437	2	61722904	ENSG00000173209.17	AHSA2	61404553	-4.97774	-0.415977	3.07646e-06	9.999e-05	7.55872e-06
Thyroid.portal.eqtl:rs10779948	2	61844160	ENSG00000173209.17	AHSA2	61404553	-4.97711	-0.424503	3.08436e-06	9.999e-05	7.55872e-06
Esophagus_Mucosa.portal.eqtl:rs2393977	10	65247609	ENSG00000148572.10	NRBF2	64893050	-5.05312	-0.44829	3.10571e-06	0.00079992	3.75225e-06
Esophagus_Mucosa.portal.eqtl:rs7915779	10	65244244	ENSG00000148572.10	NRBF2	64893050	-5.05312	-0.44829	3.10571e-06	0.00079992	3.75225e-06
Thyroid.portal.eqtl:rs78815801	7	73045938	ENSG00000009950.11	MLXIPL	73038873	4.97471	0.785564	3.11443e-06	9.999e-05	7.96634e-06
Artery_Tibial.portal.eqtl:rs7579651	2	61800279	ENSG00000173209.17	AHSA2	61404553	-4.93463	-0.415803	3.13513e-06	9.999e-05	7.54981e-06
Thyroid.portal.eqtl:rs13244268	7	72911843	ENSG00000009950.11	MLXIPL	73038873	4.9723	0.791154	3.14502e-06	9.999e-05	7.96634e-06
Thyroid.portal.eqtl:rs2240466	7	72856269	ENSG00000009950.11	MLXIPL	73038873	4.9723	0.791154	3.14502e-06	9.999e-05	7.96634e-06
Thyroid.portal.eqtl:rs4672423	2	61435275	ENSG00000173209.17	AHSA2	61404553	4.97078	0.392682	3.16438e-06	9.999e-05	7.55872e-06
Whole_Blood.portal.eqtl:rs7334078	13	99120484	ENSG00000152767.11	FARP1	98794816	4.84638	0.324782	3.17869e-06	9.999e-05	3.23607e-06
Thyroid.portal.eqtl:rs75229905	7	72895946	ENSG00000009950.11	MLXIPL	73038873	4.96473	0.793931	3.24279e-06	9.999e-05	7.96634e-06
Thyroid.portal.eqtl:rs35695283	7	72893403	ENSG00000009950.11	MLXIPL	73038873	4.96307	0.794251	3.26455e-06	9.999e-05	7.96634e-06
Adipose_Subcutaneous.portal.eqtl:rs2518937	2	61791954	ENSG00000173209.17	AHSA2	61404553	-4.96513	-0.423553	3.28587e-06	9.999e-05	3.79073e-06
Thyroid.portal.eqtl:rs780092	2	27743154	ENSG00000115226.5	FNDC4	27718112	4.95864	0.553327	3.32351e-06	9.999e-05	7.65065e-06
Thyroid.portal.eqtl:rs6739427	2	61452879	ENSG00000173209.17	AHSA2	61404553	4.95806	0.395156	3.33134e-06	9.999e-05	7.55872e-06
Muscle_Skeletal.portal.eqtl:rs2421207	2	61769405	ENSG00000173209.17	AHSA2	61404553	-4.87426	-0.305587	3.35109e-06	9.999e-05	4.61373e-06
Artery_Tibial.portal.eqtl:rs2921718	2	61795267	ENSG00000173209.17	AHSA2	61404553	-4.91631	-0.410075	3.38137e-06	9.999e-05	7.54981e-06
Adipose_Subcutaneous.portal.eqtl:rs2441382	2	61811480	ENSG00000173209.17	AHSA2	61404553	-4.95598	-0.43663	3.40935e-06	9.999e-05	3.79073e-06
Thyroid.portal.eqtl:rs12056034	7	72878645	ENSG00000009950.11	MLXIPL	73038873	4.95116	0.795474	3.42549e-06	9.999e-05	7.96634e-06
Artery_Tibial.portal.eqtl:rs2592355	2	61803916	ENSG00000173209.17	AHSA2	61404553	-4.91293	-0.414562	3.4289e-06	9.999e-05	7.54981e-06
Thyroid.portal.eqtl:rs2074755	7	72877166	ENSG00000009950.11	MLXIPL	73038873	4.94973	0.795539	3.44522e-06	9.999e-05	7.96634e-06
Thyroid.portal.eqtl:rs777591	2	61417617	ENSG00000173209.17	AHSA2	61404553	-4.94822	-0.384495	3.46629e-06	9.999e-05	7.55872e-06
Adipose_Subcutaneous.portal.eqtl:rs3771260	2	61762384	ENSG00000173209.17	AHSA2	61404553	-4.95147	-0.397305	3.47184e-06	9.999e-05	3.79073e-06
Thyroid.portal.eqtl:rs4886649	15	75328595	ENSG00000198794.7	SCAMP5	75287873	-4.94778	-0.541167	3.47245e-06	9.999e-05	6.47748e-06
Lung.portal.eqtl:rs35103257	15	75277412	ENSG00000198794.7	SCAMP5	75287873	-4.9039	-0.435866	3.55894e-06	0.00019998	4.81022e-06
Artery_Tibial.portal.eqtl:rs1562309	2	61770126	ENSG00000173209.17	AHSA2	61404553	-4.899	-0.410059	3.63151e-06	9.999e-05	7.54981e-06
Adipose_Subcutaneous.portal.eqtl:rs2518933	2	61797030	ENSG00000173209.17	AHSA2	61404553	-4.93953	-0.42637	3.64283e-06	9.999e-05	3.79073e-06
Muscle_Skeletal.portal.eqtl:rs777593	2	61419103	ENSG00000173209.17	AHSA2	61404553	-4.85379	-0.30683	3.65389e-06	9.999e-05	4.61373e-06
Adipose_Subcutaneous.portal.eqtl:rs2592356	2	61810428	ENSG00000173209.17	AHSA2	61404553	-4.93847	-0.428643	3.65831e-06	9.999e-05	3.79073e-06
Thyroid.portal.eqtl:rs34763247	7	72866616	ENSG00000009950.11	MLXIPL	73038873	4.93411	0.795621	3.66927e-06	9.999e-05	7.96634e-06
Artery_Tibial.portal.eqtl:rs2421331	2	61835240	ENSG00000173209.17	AHSA2	61404553	-4.89406	-0.397423	3.70602e-06	9.999e-05	7.54981e-06
Thyroid.portal.eqtl:rs714052	7	72864869	ENSG00000009950.11	MLXIPL	73038873	4.93113	0.795541	3.71351e-06	9.999e-05	7.96634e-06
Thyroid.portal.eqtl:rs13231516	7	72863249	ENSG00000009950.11	MLXIPL	73038873	4.92838	0.795446	3.7549e-06	9.999e-05	7.96634e-06
Adipose_Subcutaneous.portal.eqtl:rs2427885	2	61816777	ENSG00000173209.17	AHSA2	61404553	-4.93181	-0.437783	3.75753e-06	9.999e-05	3.79073e-06
Muscle_Skeletal.portal.eqtl:rs778152	2	61608540	ENSG00000173209.17	AHSA2	61404553	4.8467	0.307957	3.76485e-06	9.999e-05	4.61373e-06
Muscle_Skeletal.portal.eqtl:rs778144	2	61583128	ENSG00000173209.17	AHSA2	61404553	4.84105	0.307487	3.85567e-06	9.999e-05	4.61373e-06
Artery_Tibial.portal.eqtl:rs6748003	2	61806700	ENSG00000173209.17	AHSA2	61404553	-4.85522	-0.415815	4.3468e-06	9.999e-05	7.54981e-06
Whole_Blood.portal.eqtl:rs777593	2	61419103	ENSG00000212978.5	AC016747.3	61372104	-4.77226	-0.296049	4.377e-06	9.999e-05	6.63194e-06
Skin_Sun_Exposed_Lower_leg.portal.eqtl:rs35332062	7	73012042	ENSG00000009950.11	MLXIPL	73038873	4.88249	0.738829	4.39341e-06	0.00049995	5.39652e-06
Muscle_Skeletal.portal.eqtl:rs778752	2	61776902	ENSG00000173209.17	AHSA2	61404553	-4.80692	-0.312082	4.45071e-06	9.999e-05	4.61373e-06
Thyroid.portal.eqtl:rs778758	2	61782161	ENSG00000173209.17	AHSA2	61404553	-4.88516	-0.407137	4.46709e-06	9.999e-05	7.55872e-06
Muscle_Skeletal.portal.eqtl:rs3771258	2	61764140	ENSG00000173209.17	AHSA2	61404553	-4.80591	-0.312039	4.4695e-06	9.999e-05	4.61373e-06
Muscle_Skeletal.portal.eqtl:rs11887205	2	61774473	ENSG00000173209.17	AHSA2	61404553	-4.80523	-0.312006	4.48222e-06	9.999e-05	4.61373e-06
Muscle_Skeletal.portal.eqtl:rs1562308	2	61768421	ENSG00000173209.17	AHSA2	61404553	-4.80523	-0.312006	4.48222e-06	9.999e-05	4.61373e-06
Skin_Sun_Exposed_Lower_leg.portal.eqtl:rs13235543	7	73013901	ENSG00000009950.11	MLXIPL	73038873	4.87486	0.700102	4.53042e-06	0.00049995	5.39652e-06
Esophagus_Mucosa.portal.eqtl:rs8061772	16	30119525	ENSG00000261367.1	RP11-455F5.4	30118996	-4.95419	-0.945909	4.55064e-06	0.00253205	8.51256e-06
Skin_Sun_Exposed_Lower_leg.portal.eqtl:rs13246993	7	73022746	ENSG00000009950.11	MLXIPL	73038873	4.85646	0.697847	4.87811e-06	0.00049995	5.39652e-06
Thyroid.portal.eqtl:rs6545845	2	61437044	ENSG00000173209.17	AHSA2	61404553	4.85407	0.387431	5.059e-06	9.999e-05	7.55872e-06
Thyroid.portal.eqtl:rs78680773	2	27751562	ENSG00000115226.5	FNDC4	27718112	4.84643	0.574857	5.21568e-06	9.999e-05	7.65065e-06
Whole_Blood.portal.eqtl:rs2921718	2	61795267	ENSG00000212978.5	AC016747.3	61372104	-4.7207	-0.295472	5.45766e-06	9.999e-05	6.63194e-06
Whole_Blood.portal.eqtl:rs2518937	2	61791954	ENSG00000212978.5	AC016747.3	61372104	-4.72011	-0.297184	5.47135e-06	9.999e-05	6.63194e-06
Thyroid.portal.eqtl:rs10496092	2	61524679	ENSG00000271889.1	RP11-493E12.1	61389240	-4.81922	-0.550598	5.81335e-06	0.00197239	7.27401e-06
Artery_Tibial.portal.eqtl:rs28749199	2	61827052	ENSG00000173209.17	AHSA2	61404553	-4.77975	-0.40108	5.91376e-06	9.999e-05	7.54981e-06
Thyroid.portal.eqtl:rs13004855	2	61505072	ENSG00000271889.1	RP11-493E12.1	61389240	-4.80305	-0.549126	6.19954e-06	0.00197239	7.27401e-06
Thyroid.portal.eqtl:rs12620105	2	61512321	ENSG00000271889.1	RP11-493E12.1	61389240	-4.80303	-0.549142	6.19993e-06	0.00197239	7.27401e-06
Thyroid.portal.eqtl:rs6749226	2	61509783	ENSG00000271889.1	RP11-493E12.1	61389240	-4.80229	-0.549179	6.21831e-06	0.00197239	7.27401e-06
Thyroid.portal.eqtl:rs4672425	2	61444998	ENSG00000271889.1	RP11-493E12.1	61389240	-4.79131	-0.536482	6.49553e-06	0.00197239	7.27401e-06
Thyroid.portal.eqtl:rs1880866	2	61698972	ENSG00000173209.17	AHSA2	61404553	-4.78548	-0.375755	6.64743e-06	9.999e-05	7.55872e-06
Thyroid.portal.eqtl:rs1186710	2	61688727	ENSG00000173209.17	AHSA2	61404553	-4.77867	-0.375725	6.82928e-06	9.999e-05	7.55872e-06
Thyroid.portal.eqtl:rs13221253	7	72922233	ENSG00000009950.11	MLXIPL	73038873	4.77636	0.759879	6.89215e-06	9.999e-05	7.96634e-06
Thyroid.portal.eqtl:rs11691734	2	61702466	ENSG00000173209.17	AHSA2	61404553	-4.77017	-0.375157	7.0631e-06	9.999e-05	7.55872e-06
Thyroid.portal.eqtl:rs12713436	2	61691260	ENSG00000173209.17	AHSA2	61404553	-4.77009	-0.375155	7.06535e-06	9.999e-05	7.55872e-06
Thyroid.portal.eqtl:rs1867839	2	61694797	ENSG00000173209.17	AHSA2	61404553	-4.77009	-0.375155	7.06535e-06	9.999e-05	7.55872e-06
Thyroid.portal.eqtl:rs2252662	2	61670731	ENSG00000173209.17	AHSA2	61404553	-4.77009	-0.375155	7.06535e-06	9.999e-05	7.55872e-06
Thyroid.portal.eqtl:rs2256617	2	61679924	ENSG00000173209.17	AHSA2	61404553	-4.77009	-0.375155	7.06535e-06	9.999e-05	7.55872e-06
Thyroid.portal.eqtl:rs2694635	2	61676940	ENSG00000173209.17	AHSA2	61404553	-4.77009	-0.375155	7.06535e-06	9.999e-05	7.55872e-06
Thyroid.portal.eqtl:rs7588814	2	61695589	ENSG00000173209.17	AHSA2	61404553	-4.77009	-0.375155	7.06535e-06	9.999e-05	7.55872e-06
Thyroid.portal.eqtl:rs2518937	2	61791954	ENSG00000173209.17	AHSA2	61404553	-4.76095	-0.400421	7.32563e-06	9.999e-05	7.55872e-06
