# Supplementary material for: GWAS for urinary sodium and potassium excretion highlights pathways shared with cardiovascular traits
Source: Nat Commun. 2019 Aug 13;10:3653. doi: 10.1038/s41467-019-11451-y (PMC6692500; doi:10.1038/s41467-019-11451-y)
Supplement: Supplementary file 20 — Supplementary Dataset 20 [file 41467_2019_11451_MOESM20_ESM.xlsx]

## Sheet: Supplementary Data 20
Supplementary Data 20: Summary of eQTL effects of urinary potassium SNPs (P<1×10-8) from eQTL look up using GTeX .
SNP	SNP_Chr	SNP_Pos	Gen_ID	Gene_Name	Gene_Pos	T_Stat	Beta	P_Val	EmpP	nom_thresh
Artery_Tibial.portal.eqtl:rs11634836	15	75514313	ENSG00000198794.7	SCAMP5	75287873	-5.33959	-0.488653	5.67025e-07	9.999e-05	7.59796e-06
Artery_Tibial.portal.eqtl:rs1873379	15	75498744	ENSG00000198794.7	SCAMP5	75287873	-5.07102	-0.440767	1.77662e-06	9.999e-05	7.59796e-06
Artery_Tibial.portal.eqtl:rs76307456	15	75492307	ENSG00000198794.7	SCAMP5	75287873	-5.07006	-0.440728	1.78375e-06	9.999e-05	7.59796e-06
Artery_Tibial.portal.eqtl:rs11738281	5	662547	ENSG00000271781.1	CTD-2589H19.6	675941	-4.90039	-0.785942	3.61077e-06	0.00272063	3.89887e-06
Artery_Tibial.portal.eqtl:rs11955068	5	582324	ENSG00000271781.1	CTD-2589H19.6	675941	-5.06298	-0.77101	1.83749e-06	0.00272063	3.89887e-06
Artery_Tibial.portal.eqtl:rs12518859	5	587432	ENSG00000271781.1	CTD-2589H19.6	675941	-4.90941	-0.759551	3.47909e-06	0.00272063	3.89887e-06
Artery_Tibial.portal.eqtl:rs12521091	5	590710	ENSG00000271781.1	CTD-2589H19.6	675941	-4.92573	-0.757832	3.25249e-06	0.00272063	3.89887e-06
Artery_Tibial.portal.eqtl:rs12522140	5	587261	ENSG00000271781.1	CTD-2589H19.6	675941	-4.90458	-0.759181	3.5489e-06	0.00272063	3.89887e-06
Artery_Tibial.portal.eqtl:rs12522724	5	590742	ENSG00000271781.1	CTD-2589H19.6	675941	-4.92509	-0.757907	3.26112e-06	0.00272063	3.89887e-06
Artery_Tibial.portal.eqtl:rs1399381	5	589853	ENSG00000271781.1	CTD-2589H19.6	675941	-4.92836	-0.757373	3.21741e-06	0.00272063	3.89887e-06
Artery_Tibial.portal.eqtl:rs28364691	5	664084	ENSG00000271781.1	CTD-2589H19.6	675941	-4.89568	-0.763482	3.68139e-06	0.00272063	3.89887e-06
Artery_Tibial.portal.eqtl:rs3915384	5	573395	ENSG00000271781.1	CTD-2589H19.6	675941	-5.06298	-0.77101	1.83749e-06	0.00272063	3.89887e-06
Artery_Tibial.portal.eqtl:rs4957048	5	583442	ENSG00000271781.1	CTD-2589H19.6	675941	-5.06298	-0.77101	1.83749e-06	0.00272063	3.89887e-06
Artery_Tibial.portal.eqtl:rs4957049	5	579080	ENSG00000271781.1	CTD-2589H19.6	675941	-5.06223	-0.770926	1.84329e-06	0.00272063	3.89887e-06
Artery_Tibial.portal.eqtl:rs4957050	5	579066	ENSG00000271781.1	CTD-2589H19.6	675941	-5.06223	-0.770926	1.84329e-06	0.00272063	3.89887e-06
Artery_Tibial.portal.eqtl:rs55647623	5	567747	ENSG00000271781.1	CTD-2589H19.6	675941	-4.97388	-0.744593	2.6646e-06	0.00272063	3.89887e-06
Artery_Tibial.portal.eqtl:rs56328416	5	591138	ENSG00000271781.1	CTD-2589H19.6	675941	-4.91597	-0.758507	3.38625e-06	0.00272063	3.89887e-06
Artery_Tibial.portal.eqtl:rs56410216	5	583216	ENSG00000271781.1	CTD-2589H19.6	675941	-5.06298	-0.77101	1.83749e-06	0.00272063	3.89887e-06
Artery_Tibial.portal.eqtl:rs72703044	5	579737	ENSG00000271781.1	CTD-2589H19.6	675941	-5.06298	-0.77101	1.83749e-06	0.00272063	3.89887e-06
Artery_Tibial.portal.eqtl:rs72703046	5	580129	ENSG00000271781.1	CTD-2589H19.6	675941	-5.06298	-0.77101	1.83749e-06	0.00272063	3.89887e-06
Artery_Tibial.portal.eqtl:rs72703064	5	587825	ENSG00000271781.1	CTD-2589H19.6	675941	-4.91203	-0.759374	3.44165e-06	0.00272063	3.89887e-06
Artery_Tibial.portal.eqtl:rs72703065	5	588123	ENSG00000271781.1	CTD-2589H19.6	675941	-4.91556	-0.759359	3.39195e-06	0.00272063	3.89887e-06
Artery_Tibial.portal.eqtl:rs72703070	5	590458	ENSG00000271781.1	CTD-2589H19.6	675941	-4.92836	-0.757373	3.21741e-06	0.00272063	3.89887e-06
Artery_Tibial.portal.eqtl:rs72703072	5	590626	ENSG00000271781.1	CTD-2589H19.6	675941	-4.92664	-0.757694	3.24033e-06	0.00272063	3.89887e-06
Esophagus_Muscularis.portal.eqtl:rs12515615	5	520263	ENSG00000066230.6	SLC9A3	524447	5.14211	0.790684	2.42276e-06	9.999e-05	3.01181e-06
Whole_Blood.portal.eqtl:rs12944041	17	8073097	ENSG00000269928.1	RP11-849F2.8	8128798	4.94406	0.258865	2.07497e-06	9.999e-05	3.37828e-06
