# Supplementary material for: GWAS for urinary sodium and potassium excretion highlights pathways shared with cardiovascular traits
Source: Nat Commun. 2019 Aug 13;10:3653. doi: 10.1038/s41467-019-11451-y (PMC6692500; doi:10.1038/s41467-019-11451-y)
Supplement: Supplementary file 21 — Supplementary Dataset 21 [file 41467_2019_11451_MOESM21_ESM.xlsx]

## Sheet: Supplementary Data 21
Supplementary Data 21: Ingenuity Pathway Analysis for genen near or eQTL with urinary sodium and potassium excretion.
Results based on the genes from the full set GWAS					Results based on the genes from exclusive GWAS (N=262,531)
Categories	Diseases or Functions Annotation	p-Value	Molecules	N Molecules	Categories	Diseases or Functions Annotation	p-Value	Molecules	N Molecules
Behavior*	Behavior	7.22e-07	ADRA2C,BDNF,BRINP1,CHST10,CYP2A6 (includes others),FGF21,FKBP8,FTO,HTR4,LRRN2,mir-128,NEGR1,NRXN3,PPP3R1,RARB,SCN2A	16	Organismal Injury and Abnormalities	Benign lesion	2.88e-06	ADH1B,ADRA2C,AHR,BDNF,HTR4,NEGR1,NRXN3,PKHD1,RARB,SCN2A	10
Behavior	Cognition	3.8e-05	ADRA2C,BDNF,BRINP1,CHST10,FTO,HTR4,NRXN3,PPP3R1,RARB	9	Organismal Functions	Thermoregulation	5.73e-06	BDNF,FGF21,FTO,MLXIPL,PLCL1	5
Cell Morphology	Plasticity of neurons	6.36e-05	BDNF,RARB	2	Developmental Disorder,Organismal Injury and Abnormalities,Renal and Urological Disease	Congenital anomalies of kidney and urinary tract	1.02e-05	ADH1B,ADRA2C,CYP1A1,mir-128,PKHD1,RARB	6
Developmental Disorder, Organismal Injury and Abnormalities, Renal and Urological Disease	Congenital anomalies of kidney and urinary tract	7.71e-05	ADH1B,ADRA2C,CYP1A1,mir-128,PKHD1,RARB,TMEM107	7	Digestive System Development and Function,Hepatic System Development and Function,Organ Development	Function of liver	1.13e-05	AHR,CYP1A1,FGF21,MLXIPL	4
Drug Metabolism	Metabolism of coumarin	9.53e-05	CYP1A1,CYP2A6 (includes others)	2	Organismal Functions	Body temperature	1.38e-05	BDNF,FGF21,MLXIPL,PLCL1	4
Organismal Functions	Nighttime core body temperature	9.53e-05	BDNF,PLCL1	2	Organismal Functions	Energy homeostasis	1.39e-05	FGF21,FTO,MLXIPL,PLCL1,RARB	5
Behavior	Learning	0.000121	ADRA2C,BDNF,BRINP1,CHST10,FTO,NRXN3,PPP3R1,RARB	8	Cell Morphology	Plasticity of neurons	1.44e-05	BDNF,RARB	2
Cellular Assembly and Organization, Cellular Function and Maintenance, Nervous System Development and Function	Release of synaptic vesicles	0.000133	BDNF,PPP3R1	2	Cell-To-Cell Signaling and Interaction,Drug Metabolism,Molecular Transport,Small Molecule Biochemistry	Quantity of epinephrine	2.1e-05	ADRA2C,FGF21,FTO	3
Nutritional Disease	Weight loss	0.000164	AHR,BDNF,CYP1A1,FGF21,FNDC4,SCN2A	6	Organismal Functions	Nighttime core body temperature	2.16e-05	BDNF,PLCL1	2
Drug Metabolism, Nucleic Acid Metabolism, Small Molecule Biochemistry	Metabolism of theophylline	0.000177	CYP1A1,CYP2A6 (includes others)	2	Nutritional Disease	Obesity	2.33e-05	ADRA2C,BDNF,FGF21,FTO,HTR4,PLCL1,SCN2A	7
Organismal Functions	Thermoregulation	0.000192	BDNF,FGF21,FTO,MLXIPL,PLCL1	5	Endocrine System Development and Function,Molecular Transport,Small Molecule Biochemistry	Concentration of hormone	3.86e-05	AHR,BDNF,FGF21,FTO,GCKR,MLXIPL	6
Digestive System Development and Function, Hepatic System Development and Function, Organ Development	Function of liver	0.000199	AHR,CYP1A1,FGF21,MLXIPL	4	Skeletal and Muscular System Development and Function	Size of skeleton	3.91e-05	CYP1A1,HTR4,PLCL1	3
Behavior	Rearing	0.00022	BDNF,BRINP1,mir-128,RARB	4	Connective Tissue Development and Function,Skeletal and Muscular System Development and Function,Tissue Development	Morphology of bone	4.13e-05	AHR,CYP1A1,FGF21,HTR4,PLCL1,RARB,SLC4A7	7
Behavior, Nervous System Development and Function	Short-term memory	0.000221	BDNF,BRINP1,PPP3R1	3	Nutritional Disease	Weight loss	4.31e-05	AHR,BDNF,CYP1A1,FGF21,SCN2A	5
Infectious Diseases	Release of Hepatitis C virus	0.000228	CYP1A1,PRKD1	2	Digestive System Development and Function,Hepatic System Development and Function,Organ Morphology,Organismal Development	Mass of liver	4.33e-05	AHR,CYP1A1,FGF21,MLXIPL	4
Organismal Functions	Body temperature	0.000243	BDNF,FGF21,MLXIPL,PLCL1	4	Organismal Functions	Energy expenditure	4.88e-05	FGF21,FTO,PLCL1,RARB	4
Cell-To-Cell Signaling and Interaction, Drug Metabolism, Molecular Transport, Small Molecule Biochemistry	Quantity of epinephrine	0.000251	ADRA2C,FGF21,FTO	3	Cell-To-Cell Signaling and Interaction,Molecular Transport,Small Molecule Biochemistry	Quantity of catecholamine	5.23e-05	ADRA2C,BDNF,FGF21,FTO	4
Skeletal and Muscular System Development and Function	Size of skeleton	0.000267	CYP1A1,HTR4,PLCL1	3	Organismal Injury and Abnormalities,Skeletal and Muscular Disorders	Fibromyalgia	5.63e-05	ADRA2C,BDNF,SCN2A	3
Behavior, Nervous System Development and Function	Memory	0.000282	ADRA2C,BDNF,BRINP1,CHST10,FTO,PPP3R1	6	Connective Tissue Development and Function,Tissue Morphology	Quantity of connective tissue	5.9e-05	AHR,FGF21,FTO,HTR4,MLXIPL,PLCL1,RARB	7
Endocrine System Disorders, Gastrointestinal Disease, Inflammatory Disease, Inflammatory Response, Organismal Injury and Abnormalities	Chronic pancreatitis	0.000283	AHR,CYP1A1,PRKD1	3	Embryonic Development,Organ Development,Organismal Development,Renal and Urological System Development and Function,Tissue Development	Formation of kidney	7.26e-05	AHR,BDNF,FGF21,PKHD1,RARB	5
Lipid Metabolism, Small Molecule Biochemistry	Activation of fatty acid	0.000415	CYP2A6 (includes others),FGF21	2	Cancer,Organismal Injury and Abnormalities	Benign Tumors	7.45e-05	ADH1B,ADRA2C,AHR,BDNF,HTR4,NEGR1,NRXN3,RARB	8
Cell-To-Cell Signaling and Interaction, Nervous System Development and Function	Neurotransmission	0.000439	BDNF,CHST10,HTR4,KCTD13,PPP3R1,RARB,SCN2A	7	Connective Tissue Development and Function,Skeletal and Muscular System Development and Function,Tissue Development	Size of bone	9.23e-05	AHR,CYP1A1,FGF21,HTR4,PLCL1	5
Nutritional Disease	Obesity	0.000473	ADRA2C,BDNF,FGF21,FTO,HTR4,PLCL1,SCN2A,TRIM72	8	Behavior,Digestive System Development and Function	Feeding	0.000107	BDNF,FGF21,FTO,HTR4,NEGR1	5
Behavior, Digestive System Development and Function	Feeding	0.000478	BDNF,FGF21,FKBP8,FTO,HTR4,NEGR1	6	Digestive System Development and Function,Embryonic Development,Organismal Development	Development of bile duct	0.000112	AHR,PKHD1	2
Digestive System Development and Function, Embryonic Development, Organismal Development	Development of bile duct	0.00049	AHR,PKHD1	2	Behavior	Cognition	0.000121	ADRA2C,BDNF,FTO,HTR4,NRXN3,RARB	6
Neurological Disease, Skeletal and Muscular Disorders	Muscle spasticity	0.00049	ADRA2C,BDNF	2	Skeletal and Muscular System Development and Function	Morphology of skeleton	0.000124	CYP1A1,FGF21,HTR4,PLCL1,RARB	5
Organismal Injury and Abnormalities, Skeletal and Muscular Disorders	Fibromyalgia	0.000535	ADRA2C,BDNF,SCN2A	3	Neurological Disease,Skeletal and Muscular Disorders	Muscle spasticity	0.00013	ADRA2C,BDNF	2
Skeletal and Muscular System Development and Function	Morphology of skeleton	0.000589	CYP1A1,FGF21,FKBP8,HTR4,PLCL1,RARB	6	Cell Morphology,Tissue Morphology	Morphology of connective tissue cells	0.000137	AHR,BDNF,FGF21,FTO,SLC4A7	5
Digestive System Development and Function, Gastrointestinal Disease, Organ Morphology, Organismal Development, Organismal Injury and Abnormalities	Abnormal morphology of large intestine	0.000615	AHR,BDNF,SLC9A3	3	Endocrine System Development and Function,Lipid Metabolism,Molecular Transport,Small Molecule Biochemistry	Quantity of glucocorticoid	0.00015	AHR,FGF21	2
Nervous System Development and Function, Neurological Disease	Abnormal morphology of small dorsal root ganglion	0.000657	BDNF,FKBP8	2	Endocrine System Disorders,Metabolic Disease	Insulin resistance	0.000173	BDNF,FGF21,GCKR,MLXIPL,PLCL1	5
Endocrine System Development and Function, Lipid Metabolism, Molecular Transport, Small Molecule Biochemistry	Quantity of glucocorticoid	0.000657	AHR,FGF21	2	Digestive System Development and Function	Morphology of digestive system	0.000178	AHR,BDNF,CYP1A1,FGF21,MLXIPL,PKHD1,RARB	7
Cancer, Organismal Injury and Abnormalities	Adenocarcinoma	0.000659	ABHD12B,ADH1B,ADRA2C,AHR,AHSA2P,BDNF,CHCHD3,CHST10,CYP1A1,CYP2A6 (includes others),DCDC1,DCTPP1,FAM83B,FARP1,FGF21,FKBP8,FNDC4,FTO,FUT2,GCKR,HTR4,IZUMO1,KCTD13,LRRN2,MAMSTR,MLIP,MLLT10,MLXIPL,NEGR1,NRBF2,NRXN3,NTN5,PKHD1,PLCL1,PPP3R1,PRKD1,RARB,RASIP1,SCAMP2,SCAMP5,SCN2A,SIX6,SLC4A7,SLC9A3,STK24,TRIM72,TSNARE1,UPB1,XPO1	49	Protein Synthesis	Quantity of protein in blood	0.000183	BDNF,CYP1A1,FGF21,FTO,GCKR,MLXIPL	6
Cell-To-Cell Signaling and Interaction, Nervous System Development and Function	Action potential of neurons	0.000661	BDNF,CHST10,RARB,SCN2A	4	Nutritional Disease	Weight gain	0.000186	AHR,BDNF,CYP1A1,FGF21,SCN2A	5
Digestive System Development and Function, Hepatic System Development and Function, Organ Morphology, Organismal Development	Mass of liver	0.000661	AHR,CYP1A1,FGF21,MLXIPL	4	Carbohydrate Metabolism,Molecular Transport,Small Molecule Biochemistry	Concentration of D-glucose	0.000192	BDNF,FGF21,GCKR,MLXIPL,SLC4A7	5
Cellular Development, Cellular Growth and Proliferation	Proliferation of embryonic cancer cell lines	0.00075	BDNF,RARB	2	Digestive System Development and Function,Hepatic System Development and Function,Organ Morphology,Organismal Development	Morphology of liver	0.000208	AHR,CYP1A1,FGF21,MLXIPL,PKHD1	5
Endocrine System Disorders, Metabolic Disease	Insulin resistance	0.000813	BDNF,FGF21,GCKR,MLXIPL,PLCL1,TRIM72	6	Digestive System Development and Function,Gastrointestinal Disease,Hepatic System Development and Function,Hepatic System Disease,Organ Morphology,Organismal Development,Organismal Injury and Abnormalities	Hepatomegaly	0.000217	AHR,CYP1A1,PKHD1	3
Nutritional Disease	Weight gain	0.000823	AHR,BDNF,BRINP1,CYP1A1,FGF21,SCN2A	6	Cardiovascular Disease,Developmental Disorder,Endocrine System Disorders,Hereditary Disorder,Organismal Injury and Abnormalities,Renal and Urological Disease	Williams-Beuren syndrome	0.000219	ADRA2C,MLXIPL	2
Cell-To-Cell Signaling and Interaction, Nervous System Development and Function	Excitatory postsynaptic potential of neurons	0.000829	BDNF,CHST10,RARB	3	Tissue Morphology	Quantity of cells	0.000226	AHR,BDNF,CYP1A1,FTO,HTR4,mir-128,MLXIPL,PLCL1,RARB,SIX6,SLC4A7	11
Cardiovascular Disease, Organismal Injury and Abnormalities	Advanced stage peripheral arterial disease	0.000835	BDNF,CYP1A1,NRXN3,STK24	4	Endocrine System Development and Function,Molecular Transport,Protein Synthesis,Small Molecule Biochemistry	Quantity of insulin in blood	0.000228	BDNF,FGF21,GCKR,MLXIPL	4
Organismal Functions	Energy expenditure	0.000835	FGF21,FTO,PLCL1,RARB	4	Organismal Injury and Abnormalities	Visceromegaly	0.000237	ADRA2C,AHR,CYP1A1,MLIP,MLLT10,PKHD1,RARB	7
Organismal Development	Morphology of body cavity	0.000839	ADRA2C,AHR,BDNF,CHST10,CYP1A1,FGF21,MLIP,MLLT10,MLXIPL,PKHD1,PPP3R1,RARB,RASIP1,SLC9A3	14	Cellular Development,Cellular Growth and Proliferation	Proliferation of embryonic cancer cell lines	0.000244	BDNF,RARB	2
Cancer, Organismal Injury and Abnormalities	Abdominal cancer	0.000851	ABHD12B,ADH1B,ADRA2C,AHR,AHSA2P,BDNF,CABCOCO1,CHCHD3,CHST10,CYP1A1,CYP2A6 (includes others),DCDC1,DCTPP1,FAM83B,FARP1,FGF21,FKBP8,FNDC4,FTO,FUT2,GCKR,HTR4,IZUMO1,KCTD13,LRRN2,MAMSTR,mir-128,MLIP,MLLT10,MLXIPL,NEGR1,NRBF2,NRXN3,NTN5,PKHD1,PLCL1,PPP3R1,PRKD1,RARB,RASIP1,SCAMP2,SCAMP5,SCN2A,SIX6,SLC4A7,SLC9A3,STK24,TRIM72,TSNARE1,UPB1,XPO1	51	Organismal Development	Development of genitourinary system	0.000253	ADRA2C,AHR,BDNF,FGF21,FTO,MLXIPL,PKHD1,RARB	8
Connective Tissue Development and Function, Skeletal and Muscular System Development and Function, Tissue Development	Morphology of bone	0.000923	AHR,CYP1A1,FGF21,FKBP8,HTR4,PLCL1,RARB,SLC4A7	8	Digestive System Development and Function	Ingestion by rodents	0.000269	BDNF,FGF21,FTO,HTR4	4
Cardiovascular Disease, Developmental Disorder, Endocrine System Disorders, Hereditary Disorder, Organismal Injury and Abnormalities, Renal and Urological Disease	Williams-Beuren syndrome	0.000953	ADRA2C,MLXIPL	2	Organismal Development	Morphology of body cavity	0.000279	ADRA2C,AHR,BDNF,CYP1A1,FGF21,MLIP,MLLT10,MLXIPL,PKHD1,RARB	10
Organismal Development	Size of body	0.000961	AHR,BDNF,BRINP1,FGF21,FKBP8,FTO,HTR4,MAMSTR,NEGR1,RARB	10	Organ Development,Reproductive System Development and Function	Function of ovary	0.000299	AHR,SIX6	2
Neurological Disease	Abnormality of peripheral nervous system	0.000968	ADRA2C,BDNF,FKBP8,RARB,SLC4A7	5	Connective Tissue Disorders,Organismal Injury and Abnormalities,Skeletal and Muscular Disorders	Spondyloarthropathy	0.000308	ADRA2C,BDNF,SCN2A	3
Cell-To-Cell Signaling and Interaction, Molecular Transport, Small Molecule Biochemistry	Quantity of catecholamine	0.00102	ADRA2C,BDNF,FGF21,FTO	4	Organismal Development	Morphology of head	0.000347	ADRA2C,AHR,BDNF,FTO,RARB,SCN2A,SIX6,SLC4A7	8
Developmental Disorder, Gastrointestinal Disease	Congenital anomaly of gastrointestinal tract	0.00114	ADRA2C,AHR,BDNF,FTO,TMEM107	5	Dermatological Diseases and Conditions,Organismal Injury and Abnormalities	Rosacea	0.00036	ADRA2C,RARB	2
Organismal Injury and Abnormalities, Renal and Urological Disease	Acute renal failure	0.00117	ADRA2C,PPP3R1,SLC9A3	3	Carbohydrate Metabolism,Molecular Transport	Quantity of glycogen	0.000361	FGF21,GCKR,MLXIPL	3
Connective Tissue Development and Function, Connective Tissue Disorders, Nervous System Development and Function, Organ Morphology, Organismal Development, Organismal Injury and Abnormalities, Skeletal and Muscular Disorders, Skeletal and Muscular System Development and Function, Tissue Development	Abnormal morphology of neural arch	0.00118	FKBP8,RARB	2	Behavior	Rearing	0.000399	BDNF,mir-128,RARB	3
Developmental Disorder, Hereditary Disorder, Organismal Injury and Abnormalities, Renal and Urological Disease	Polycystic Kidney Disease	0.00122	ADH1B,CYP1A1,mir-128,PKHD1,TMEM107	5	Embryonic Development,Nervous System Development and Function,Organ Development,Organ Morphology,Organismal Development,Tissue Development,Visual System Development and Function	Size of eye	0.000426	FTO,SIX6	2
Organismal Development	Morphology of head	0.00125	ADRA2C,AHR,BDNF,BRINP1,FKBP8,FTO,RARB,SCN2A,SIX6,SLC4A7,TMEM107	11	Neurological Disease	Abnormality of peripheral nervous system	0.000462	ADRA2C,BDNF,RARB,SLC4A7	4
Cellular Development, Skeletal and Muscular System Development and Function, Tissue Development	Differentiation of myotube	0.00125	BDNF,MAMSTR,TRIM72	3	Neurological Disease,Psychological Disorders	Schizoaffective disorder	0.000483	ADRA2C,RARB,SCN2A	3
Organ Development, Reproductive System Development and Function	Function of ovary	0.0013	AHR,SIX6	2	Embryonic Development,Nervous System Development and Function,Organ Development,Organismal Development,Tissue Development	Development of striatum	0.000498	BDNF,RARB	2
Organismal Survival	Organismal death	0.00137	ADRA2C,AHR,BDNF,BRINP1,CYP1A1,FGF21,FKBP8,FTO,HTR4,MAMSTR,mir-128,MLXIPL,PLCL1,PPP3R1,PRKD1,RARB,RASIP1,SCN2A,TMEM107	19	Cancer,Dermatological Diseases and Conditions,Organismal Injury and Abnormalities	Hyperplasia of epidermis	0.000541	AHR,PLCL1,RARB	3
Cell Morphology, Organ Morphology, Skeletal and Muscular System Development and Function, Tissue Morphology	Morphology of muscle cells	0.00139	AHR,BDNF,MLIP,PPP3R1,PRKD1,TRIM72	6	Developmental Disorder,Hereditary Disorder,Organismal Injury and Abnormalities,Renal and Urological Disease	Polycystic Kidney Disease	0.000575	ADH1B,CYP1A1,mir-128,PKHD1	4
Immunological Disease	Immunosuppression	0.00143	AHR,PPP3R1	2	Organismal Development	Size of body	0.000589	AHR,BDNF,FGF21,FTO,HTR4,NEGR1,RARB	7
Behavior, Nervous System Development and Function	Working memory	0.00143	BDNF,PPP3R1	2	Cancer,Organismal Injury and Abnormalities,Reproductive System Disease,Skeletal and Muscular Disorders	Uterine leiomyoma	0.000631	ADH1B,ADRA2C,AHR,NEGR1	4
Dermatological Diseases and Conditions, Organismal Injury and Abnormalities	Rosacea	0.00156	ADRA2C,RARB	2	Lipid Metabolism,Small Molecule Biochemistry	Homeostasis of triacylglycerol	0.000658	FGF21,GCKR	2
Cellular Assembly and Organization	Transport of Golgi vesicles	0.00156	PRKD1,SCAMP2	2	Carbohydrate Metabolism,Molecular Transport,Small Molecule Biochemistry	Clearance of D-glucose	0.000658	FGF21,GCKR	2
Cardiovascular Disease	Hypotension	0.00158	ADRA2C,AHR,SLC9A3	3	Nervous System Development and Function,Organ Development	Growth of brain	0.000685	AHR,BDNF,NEGR1	3
Cancer, Organismal Injury and Abnormalities	Carcinoma	0.00167	ABHD12B,ADH1B,ADRA2C,AHR,AHSA2P,BDNF,CABCOCO1,CHCHD3,CHST10,CYP1A1,CYP2A6 (includes others),DCDC1,DCTPP1,FAM83B,FARP1,FGF21,FKBP8,FNDC4,FTO,FUT2,GCKR,HTR4,IZUMO1,KCTD13,LRRN2,MAMSTR,mir-128,MLIP,MLLT10,MLXIPL,NEGR1,NRBF2,NRXN3,NTN5,PKHD1,PLCL1,PPP3R1,PRKD1,RARB,RASIP1,SCAMP2,SCAMP5,SCN2A,SIX6,SLC4A7,SLC9A3,STK24,TRIM72,TSNARE1,UPB1,XPO1	51	Neurological Disease,Organismal Injury and Abnormalities	Seizures	0.000692	BDNF,HTR4,mir-128,PLCL1,SCN2A	5
Organismal Injury and Abnormalities	Benign lesion	0.00169	ADH1B,ADRA2C,AHR,BDNF,BRINP1,HTR4,NEGR1,NRXN3,PKHD1,RARB,SCN2A	11	Psychological Disorders	Alcoholism	0.000699	ADH1B,ADRA2C,SCN2A	3
Cell Cycle	Arrest in cell cycle progression of bone cancer cell lines	0.0017	AHR,XPO1	2	Cell Morphology,Connective Tissue Development and Function,Tissue Morphology	Size of adipocytes	0.000728	BDNF,FGF21,FTO	3
Cellular Assembly and Organization, Nervous System Development and Function	Complexity of dendrites	0.0017	BDNF,FARP1	2	Behavior	Learning	0.000729	ADRA2C,BDNF,FTO,NRXN3,RARB	5
Nervous System Development and Function, Organ Morphology, Organismal Development	Morphology of cerebral neocortex	0.0017	BDNF,BRINP1	2	Cancer,Organismal Injury and Abnormalities,Reproductive System Disease	Development of genital tumor	0.000811	ABHD12B,ADH1B,ADRA2C,AHR,CYP1A1,DCDC1,HTR4,LRRN2,mir-128,NEGR1,NRXN3,PKHD1,PLCL1,RARB,SCN2A,SIX6	16
Embryonic Development, Nervous System Development and Function, Organ Development, Organ Morphology, Organismal Development, Tissue Development, Visual System Development and Function	Size of eye	0.0017	FTO,SIX6	2	Organismal Survival	Organismal death	0.000823	ADRA2C,AHR,BDNF,CYP1A1,FGF21,FTO,HTR4,mir-128,MLXIPL,PLCL1,RARB,SCN2A	12
Organismal Injury and Abnormalities, Reproductive System Disease	Benign uterine disease	0.00173	ADH1B,ADRA2C,AHR,CHST10,NEGR1	5	Behavior,Psychological Disorders	Irritable behavior	0.000839	ADRA2C,SCN2A	2
Organ Morphology, Organismal Development, Organismal Injury and Abnormalities, Reproductive System Development and Function, Reproductive System Disease	Abnormal morphology of uterus	0.00174	AHR,CHST10,RARB	3	Drug Metabolism,Lipid Metabolism,Small Molecule Biochemistry,Vitamin and Mineral Metabolism	Metabolism of tretinoin	0.000839	AHR,CYP1A1	2
Organismal Injury and Abnormalities	Visceromegaly	0.00182	ADRA2C,AHR,CYP1A1,MLIP,MLLT10,PKHD1,RARB	7	Connective Tissue Development and Function,Tissue Morphology	Quantity of adipose tissue	0.000868	FGF21,FTO,HTR4,MLXIPL	4
Endocrine System Disorders, Gastrointestinal Disease, Inflammatory Disease, Inflammatory Response, Organismal Injury and Abnormalities	Inflammation of pancreas	0.00183	ADRA2C,AHR,CYP1A1,PRKD1	4	Cell Morphology,Hair and Skin Development and Function,Organ Morphology,Tissue Morphology	Morphology of keratinocytes	0.000888	AHR,BDNF	2
Organismal Development, Organismal Injury and Abnormalities	Abnormal morphology of head	0.00184	ADRA2C,AHR,BDNF,BRINP1,FKBP8,FTO,RARB,SCN2A,SLC4A7,TMEM107	10	Cancer,Organismal Injury and Abnormalities,Reproductive System Disease	Uterine tumor	0.000908	ADH1B,ADRA2C,AHR,CYP1A1,DCDC1,HTR4,mir-128,NEGR1,NRXN3,PKHD1,PLCL1,RARB,SCN2A,SIX6	14
Digestive System Development and Function, Gastrointestinal Disease, Hepatic System Development and Function, Hepatic System Disease, Organ Morphology, Organismal Development, Organismal Injury and Abnormalities	Hepatomegaly	0.00184	AHR,CYP1A1,PKHD1	3	Endocrine System Development and Function	Glucose tolerance	0.000924	FGF21,FTO,GCKR,PLCL1	4
Cell Cycle	Arrest in cell cycle progression of sarcoma cell lines	0.00185	AHR,XPO1	2	Cell-To-Cell Signaling and Interaction,Drug Metabolism,Molecular Transport,Small Molecule Biochemistry	Secretion of norepinephrine	0.000938	ADRA2C,PLCL1	2
Immunological Disease, Infectious Diseases, Neurological Disease, Organismal Injury and Abnormalities	Tropical spastic paraparesis	0.00185	PPP3R1,RARB	2	Cell-To-Cell Signaling and Interaction,Nervous System Development and Function	Action potential of neurons	0.000968	BDNF,RARB,SCN2A	3
Connective Tissue Development and Function	Adipogenesis	0.00186	AHR,FGF21,FTO,MLXIPL	4	Organismal Development,Organismal Injury and Abnormalities	Abnormal morphology of head	0.000979	ADRA2C,AHR,BDNF,FTO,RARB,SCN2A,SLC4A7	7
Cancer, Organismal Injury and Abnormalities, Reproductive System Disease	Breast cancer	0.00189	ADRA2C,CHST10,CYP1A1,CYP2A6 (includes others),DCTPP1,FAM83B,FKBP8,FNDC4,FTO,LRRN2,MAMSTR,mir-128,MLIP,PKHD1,PPP3R1,RARB,SCN2A,SIX6,SLC4A7,XPO1	20	Neurological Disease,Psychological Disorders	Schizophrenia	0.000981	ADRA2C,BDNF,HTR4,RARB,SCN2A	5
Cancer, Organismal Injury and Abnormalities, Reproductive System Disease	Breast or ovarian cancer	0.00196	ABHD12B,ADRA2C,CHST10,CYP1A1,CYP2A6 (includes others),DCTPP1,FAM83B,FARP1,FKBP8,FNDC4,FTO,HTR4,LRRN2,MAMSTR,mir-128,MLIP,NRXN3,PKHD1,PPP3R1,RARB,SCN2A,SIX6,SLC4A7,XPO1	24	Psychological Disorders	Anxiety Disorders	0.001	ADRA2C,BDNF,SCN2A	3
Cellular Development, Cellular Growth and Proliferation, Nervous System Development and Function, Tissue Development	Development of Schwann cells	0.002	BDNF,PPP3R1	2	Neurological Disease,Organismal Injury and Abnormalities	Migraines	0.001	ADRA2C,HTR4,SCN2A	3
Cell-To-Cell Signaling and Interaction, Drug Metabolism, Molecular Transport, Small Molecule Biochemistry	Uptake of dopamine	0.002	BDNF,SCAMP2	2	Connective Tissue Development and Function	Adipogenesis	0.001	AHR,FGF21,FTO	3
Connective Tissue Disorders, Organismal Injury and Abnormalities, Skeletal and Muscular Disorders	Spondyloarthropathy	0.00202	ADRA2C,BDNF,SCN2A	3	Connective Tissue Disorders,Inflammatory Disease,Organismal Injury and Abnormalities,Skeletal and Muscular Disorders	Rheumatic disease of joint	0.00104	ADRA2C,BDNF,SCN2A	3
Endocrine System Development and Function, Molecular Transport, Small Molecule Biochemistry	Concentration of hormone	0.00213	AHR,BDNF,FGF21,FTO,GCKR,MLXIPL	6	Cardiovascular Disease,Organismal Injury and Abnormalities	Advanced stage peripheral arterial disease	0.00106	BDNF,CYP1A1,NRXN3	3
Embryonic Development, Nervous System Development and Function, Organ Development, Organismal Development, Tissue Development	Development of striatum	0.00215	BDNF,RARB	2	Developmental Disorder,Hereditary Disorder,Neurological Disease,Organismal Injury and Abnormalities	Fragile X syndrome	0.0011	ADRA2C,SCN2A	2
Gastrointestinal Disease, Organismal Injury and Abnormalities	Diarrhea	0.0022	AHR,BDNF,SLC9A3	3	Embryonic Development,Organismal Development,Tissue Development	Expansion of embryonic tissue	0.0011	AHR,HTR4	2
Skeletal and Muscular System Development and Function	Morphology of muscle	0.00226	AHR,BDNF,MAMSTR,MLIP,PPP3R1,PRKD1,TRIM72	7	Psychological Disorders	Depressive disorder	0.00114	ADRA2C,BDNF,CYP1A1,SCN2A	4
Cancer, Hematological Disease, Immunological Disease, Organismal Injury and Abnormalities	Relapsed acute leukemia	0.00232	PPP3R1,RARB,STK24	3	Lipid Metabolism,Molecular Transport,Small Molecule Biochemistry	Concentration of fatty acid	0.00115	BDNF,CYP1A1,FGF21,MLXIPL	4
Psychological Disorders	Substance-Related Disorders	0.00236	ADH1B,ADRA2C,CYP2A6 (includes others),SCN2A	4	Endocrine System Development and Function,Molecular Transport,Protein Synthesis,Small Molecule Biochemistry	Quantity of IGF1 in blood	0.00115	FGF21,FTO	2
Behavior	Vertical rearing	0.00239	BDNF,BRINP1,mir-128	3	Organismal Injury and Abnormalities	Hypertrophy	0.00117	ADRA2C,AHR,BDNF,MLIP,RARB	5
Organismal Injury and Abnormalities	Damage of genitourinary system	0.00244	ADRA2C,AHR,FGF21,SLC9A3	4	Connective Tissue Development and Function,Tissue Morphology	Quantity of fibroblasts	0.00121	AHR,RARB	2
Cancer, Organismal Injury and Abnormalities	Breast or pancreatic cancer	0.00246	ABHD12B,ADRA2C,AHR,CHST10,CYP1A1,CYP2A6 (includes others),DCDC1,DCTPP1,FAM83B,FARP1,FKBP8,FNDC4,FTO,HTR4,LRRN2,MAMSTR,mir-128,MLIP,NRXN3,PKHD1,PLCL1,PPP3R1,PRKD1,RARB,SCAMP2,SCN2A,SIX6,SLC4A7,XPO1	29	Cellular Development,Embryonic Development,Nervous System Development and Function,Organ Development,Organismal Development,Tissue Development	Maturation of medium spiny neurons	0.00123	BDNF	1
Behavior	Exploratory behavior	0.00252	BDNF,BRINP1,HTR4	3	Hereditary Disorder,Nutritional Disease,Organismal Injury and Abnormalities,Psychological Disorders	Susceptibility to bulimia nervosa type 2	0.00123	BDNF	1
Cell Morphology, Nervous System Development and Function, Neurological Disease, Tissue Morphology	Abnormal morphology of adrenergic neurons	0.00255	BDNF	1	Gene Expression	Targeting of response element	0.00123	AHR	1
Auditory Disease, Auditory and Vestibular System Development and Function, Cell Morphology, Nervous System Development and Function, Neurological Disease, Organ Morphology, Organismal Development, Organismal Injury and Abnormalities, Tissue Morphology	Abnormal morphology of type I vestibular hair cells	0.00255	BDNF	1	Renal and Urological System Development and Function	Hyperactivation of urinary bladder	0.00123	BDNF	1
Cellular Compromise	Acidification of recycling endosomes	0.00255	SLC9A3	1	Molecular Transport	Extrusion of chloride	0.00123	BDNF	1
Cell-To-Cell Signaling and Interaction, Nervous System Development and Function	Action potential of dopaminergic neurons	0.00255	BDNF	1	Cell Morphology,Cellular Development,Cellular Growth and Proliferation,Nervous System Development and Function,Organismal Development,Tissue Development	Morphogenesis of interneurons	0.00123	BDNF	1
Lipid Metabolism, Small Molecule Biochemistry	Activation of butyric acid	0.00255	FGF21	1	Cardiovascular System Development and Function,Tissue Morphology	Thickness of portal vein	0.00123	AHR	1
Developmental Disorder, Hematological Disease	Aplasia of bone marrow	0.00255	HTR4	1	Cell-To-Cell Signaling and Interaction,Nervous System Development and Function	Action potential of dopaminergic neurons	0.00123	BDNF	1
Cell Death and Survival	Apoptosis of sperm	0.00255	BDNF	1	Embryonic Development,Tissue Morphology	Fusion of second branchial arch	0.00123	RARB	1
Cancer, Cellular Development, Cellular Growth and Proliferation, Neurological Disease, Organismal Injury and Abnormalities, Tumor Morphology	Arrest in growth of neuroblastoma cells	0.00255	RARB	1	Cardiovascular System Development and Function,Tissue Morphology	Diameter of umbilical vein	0.00123	AHR	1
Cellular Compromise, Neurological Disease, Organismal Injury and Abnormalities	Atrophy of striatonigral neurons	0.00255	BDNF	1	Organismal Injury and Abnormalities	Calcification of uterus	0.00123	AHR	1
Cellular Compromise, Neurological Disease, Organismal Injury and Abnormalities	Atrophy of striatopallidal neurons	0.00255	BDNF	1	Cell Death and Survival,Cell Morphology,Hematological System Development and Function,Immunological Disease,Lymphoid Tissue Structure and Development	Loss of dendritic epidermal T cells	0.00123	AHR	1
Developmental Disorder, Neurological Disease, Psychological Disorders	Autism spectrum disorder with intellectual disability	0.00255	SCN2A	1	Cellular Development,Nervous System Development and Function,Tissue Development	Differentiation of striatonigral neurons	0.00123	BDNF	1
Metabolic Disease	Beta-ureidopropionase deficiency	0.00255	UPB1	1	Cancer,Gastrointestinal Disease,Organismal Injury and Abnormalities	Tumorigenesis of gastric gland	0.00123	AHR	1
Cell Morphology, Connective Tissue Development and Function, Inflammatory Response, Organismal Injury and Abnormalities, Respiratory Disease, Tissue Morphology	Blebbing of pulmonary fibroblasts	0.00255	AHR	1	Cellular Development,Cellular Growth and Proliferation,Connective Tissue Development and Function,Skeletal and Muscular System Development and Function,Tissue Development	Osteoblastogenesis of bone marrow mesenchymal cell-derived osteoblasts	0.00123	FGF21	1
Gastrointestinal Disease, Organismal Injury and Abnormalities	Bowel urgency	0.00255	BDNF	1	Nervous System Development and Function,Tissue Morphology	Quantity of nodose ganglion neurons	0.00123	BDNF	1
Organismal Injury and Abnormalities	Calcification of uterus	0.00255	AHR	1	Cellular Assembly and Organization,Cellular Movement,Nervous System Development and Function	Rearrangement of axons	0.00123	BDNF	1
Cell Cycle	Cell cycle progression of embryonic cancer cell lines	0.00255	RARB	1	Cellular Assembly and Organization,Nervous System Development and Function,Tissue Morphology	Quantity of synaptic spine	0.00123	BDNF	1
Cellular Movement, Nervous System Development and Function	Chemokinesis of granule cells	0.00255	BDNF	1	Developmental Disorder,Hematological Disease	Aplasia of bone marrow	0.00123	HTR4	1
Cellular Movement, Hematological System Development and Function	Chemokinesis of hematopoietic cells	0.00255	BDNF	1	Cell-To-Cell Signaling and Interaction,Nervous System Development and Function	Response of retinal ganglion cells	0.00123	BDNF	1
Cellular Movement	Chemorepulsion of growth cone	0.00255	BDNF	1	Cardiovascular System Development and Function,Embryonic Development,Hematological System Development and Function,Lymphoid Tissue Structure and Development,Organ Development,Organismal Development,Respiratory System Development and Function,Tissue Development	Formation of tracheal duct	0.00123	AHR	1
Cell Cycle, Cell Death and Survival	Chromosome condensation of pulmonary fibroblasts	0.00255	AHR	1	Cell Morphology,Cell-To-Cell Signaling and Interaction,Cellular Assembly and Organization	Electrical resistance of heart cell lines	0.00123	RARB	1
Cardiovascular Disease, Dermatological Diseases and Conditions, Developmental Disorder, Hereditary Disorder, Organismal Injury and Abnormalities	Congenital heart defects and ectodermal dysplasia	0.00255	PRKD1	1	Auditory and Vestibular System Development and Function,Auditory Disease,Cell Morphology,Nervous System Development and Function,Neurological Disease,Organ Morphology,Organismal Development,Organismal Injury and Abnormalities,Tissue Morphology	Abnormal morphology of type I vestibular hair cells	0.00123	BDNF	1
Developmental Disorder, Gastrointestinal Disease, Hereditary Disorder, Organismal Injury and Abnormalities	Congenital secretory sodium diarrhea type 8	0.00255	SLC9A3	1	Developmental Disorder,Hereditary Disorder,Neurological Disease,Organismal Injury and Abnormalities	Early infantile epileptic encephalopathy type 11	0.00123	SCN2A	1
Behavior, Nervous System Development and Function	Declarative memory	0.00255	BDNF	1	Cellular Assembly and Organization,Cellular Function and Maintenance,Nervous System Development and Function,Tissue Morphology	Quantity of collateral branches	0.00123	BDNF	1
Tissue Morphology	Deficiency of mast cells	0.00255	AHR	1	Cancer,Gastrointestinal Disease,Organismal Injury and Abnormalities	Hyperplasia of pylorus	0.00123	AHR	1
Cell Cycle	Delay in G1/S phase transition of hepatoma cell lines	0.00255	AHR	1	Cancer,Cellular Development,Cellular Growth and Proliferation,Neurological Disease,Organismal Injury and Abnormalities,Tumor Morphology	Arrest in growth of neuroblastoma cells	0.00123	RARB	1
Cell Cycle, Cell Morphology	Delay in initiation of assembly of mitotic spindle	0.00255	MLXIPL	1	Digestive System Development and Function,Embryonic Development,Organ Development,Organismal Development,Tissue Development	Development of tongue papilla	0.00123	BDNF	1
Cellular Assembly and Organization, Nervous System Development and Function, Tissue Morphology	Density of intraganglionic laminar ending	0.00255	BDNF	1	Cell-To-Cell Signaling and Interaction,Nervous System Development and Function	Synaptic transmission of GABA	0.00123	BDNF	1
Carbohydrate Metabolism, Molecular Transport, Small Molecule Biochemistry	Deposition of chondroitin sulfate proteoglycan	0.00255	BDNF	1	Cell Cycle	Delay in G1/S phase transition of hepatoma cell lines	0.00123	AHR	1
Digestive System Development and Function, Embryonic Development, Organ Development, Organismal Development, Tissue Development	Development of tongue papilla	0.00255	BDNF	1	Developmental Disorder	Hypoplasia of first branchial arch	0.00123	RARB	1
Cardiovascular System Development and Function, Tissue Morphology	Diameter of portal vein	0.00255	AHR	1	Cell Morphology,Endocrine System Development and Function,Nervous System Development and Function	Innervation of pineal gland	0.00123	BDNF	1
Cardiovascular System Development and Function, Tissue Morphology	Diameter of umbilical vein	0.00255	AHR	1	Hereditary Disorder,Nutritional Disease,Organismal Injury and Abnormalities	Susceptibility to obesity type BMIQ14	0.00123	FTO	1
Cellular Development, Nervous System Development and Function, Tissue Development	Differentiation of striatonigral neurons	0.00255	BDNF	1	Hereditary Disorder,Neurological Disease,Organismal Injury and Abnormalities,Psychological Disorders,Skeletal and Muscular Disorders	Huntingtons disease grade 2 Huntington disease	0.00123	BDNF	1
Cell-To-Cell Signaling and Interaction, Cellular Function and Maintenance, Nervous System Development and Function	Discharge of granule cells	0.00255	BDNF	1	Cellular Movement,Nervous System Development and Function	Chemokinesis of granule cells	0.00123	BDNF	1
Cellular Assembly and Organization	Dispersal of nuclear bodies	0.00255	XPO1	1	Cell-To-Cell Signaling and Interaction,Cellular Function and Maintenance,Nervous System Development and Function	Discharge of granule cells	0.00123	BDNF	1
Cellular Compromise, Neurological Disease, Organismal Injury and Abnormalities	Dysfunction of dopaminergic neurons	0.00255	BDNF	1	Cellular Compromise,Neurological Disease,Organismal Injury and Abnormalities	Atrophy of striatopallidal neurons	0.00123	BDNF	1
Ophthalmic Disease, Organismal Injury and Abnormalities	Dysfunction of lacrimal gland	0.00255	CYP1A1	1	Digestive System Development and Function,Embryonic Development,Organ Development,Organismal Development,Tissue Development	Formation of salivary duct	0.00123	AHR	1
Developmental Disorder, Hereditary Disorder, Neurological Disease, Organismal Injury and Abnormalities	Early infantile epileptic encephalopathy type 11	0.00255	SCN2A	1	Developmental Disorder	Teratogenesis	0.00123	AHR	1
Cell Morphology, Cell-To-Cell Signaling and Interaction, Cellular Assembly and Organization	Electrical resistance of heart cell lines	0.00255	RARB	1	Cell Morphology,Cellular Movement,Nervous System Development and Function	Innervation of sympathetic preganglionic neurons	0.00123	BDNF	1
Molecular Transport	Export of H+	0.00255	SLC9A3	1	Developmental Disorder	Hypoplasia of second branchial arch	0.00123	RARB	1
Molecular Transport	Extrusion of chloride	0.00255	BDNF	1	Cellular Development,Cellular Growth and Proliferation,Nervous System Development and Function,Organ Development,Tissue Development	Proliferation of striatal neurons	0.00123	BDNF	1
Connective Tissue Disorders, Organismal Injury and Abnormalities	Fibrosis of submucosa	0.00255	AHR	1	Cancer,Gastrointestinal Disease,Organismal Injury and Abnormalities	Hyperplasia of salivary gland	0.00123	RARB	1
Embryonic Development, Nervous System Development and Function, Organ Development, Organismal Development, Tissue Development	Formation of internal granular layer of cerebellum	0.00255	BDNF	1	Embryonic Development,Organ Development,Organismal Development,Reproductive System Development and Function,Tissue Development	Growth of lactiferous duct	0.00123	AHR	1
Digestive System Development and Function, Embryonic Development, Organ Development, Organismal Development, Tissue Development	Formation of salivary duct	0.00255	AHR	1	Embryonic Development,Tissue Morphology	Fusion of first branchial arch	0.00123	RARB	1
Cardiovascular System Development and Function, Embryonic Development, Hematological System Development and Function, Lymphoid Tissue Structure and Development, Organ Development, Organismal Development, Respiratory System Development and Function, Tissue Development	Formation of tracheal duct	0.00255	AHR	1	Developmental Disorder,Hereditary Disorder,Ophthalmic Disease,Organismal Injury and Abnormalities	Syndromic microphthalmia type 12	0.00123	RARB	1
Cellular Function and Maintenance, Nervous System Development and Function, Tissue Development	Function of serotonergic neurons	0.00255	BDNF	1	Amino Acid Metabolism,Small Molecule Biochemistry	Neurotoxicity of L-glutamic acid	0.00123	BDNF	1
Embryonic Development, Tissue Morphology	Fusion of first branchial arch	0.00255	RARB	1	Digestive System Development and Function,Organ Morphology	Quantity of fungiform papillae	0.00123	BDNF	1
Embryonic Development, Tissue Morphology	Fusion of second branchial arch	0.00255	RARB	1	Lipid Metabolism,Small Molecule Biochemistry,Vitamin and Mineral Metabolism	Production of 2-hydroxyestradiol	0.00123	CYP1A1	1
Embryonic Development, Organ Development, Organismal Development, Reproductive System Development and Function, Tissue Development	Growth of lactiferous duct	0.00255	AHR	1	Connective Tissue Disorders,Developmental Disorder,Gastrointestinal Disease,Hereditary Disorder,Organismal Development,Organismal Injury and Abnormalities,Skeletal and Muscular Disorders	Growth retardation, developmental delay, coarse facies, and early death	0.00123	FTO	1
Connective Tissue Disorders, Developmental Disorder, Gastrointestinal Disease, Hereditary Disorder, Organismal Development, Organismal Injury and Abnormalities, Skeletal and Muscular Disorders	Growth retardation, developmental delay, coarse facies, and early death	0.00255	FTO	1	Cellular Movement	Chemorepulsion of growth cone	0.00123	BDNF	1
Hereditary Disorder, Neurological Disease, Organismal Injury and Abnormalities, Psychological Disorders, Skeletal and Muscular Disorders	Huntingtons disease grade 2 Huntington disease	0.00255	BDNF	1	Cell Morphology,Cellular Assembly and Organization,Organismal Injury and Abnormalities,Tissue Morphology	Hypertrophy of perikaryon	0.00123	BDNF	1
Drug Metabolism	Hydroxylation of coumarin	0.00255	CYP2A6 (includes others)	1	Drug Metabolism,Endocrine System Development and Function,Lipid Metabolism,Molecular Transport,Small Molecule Biochemistry	Quantity of dexamethasone	0.00123	AHR	1
Renal and Urological System Development and Function	Hyperactivation of urinary bladder	0.00255	BDNF	1	Cell Death and Survival,Nervous System Development and Function	Survival of striatonigral neurons	0.00123	BDNF	1
Cellular Function and Maintenance, Nervous System Development and Function, Tissue Development	Hyperfunction of dopaminergic neurons	0.00255	BDNF	1	Cell Cycle,Cell Morphology	Delay in initiation of assembly of mitotic spindle	0.00123	MLXIPL	1
Cancer, Gastrointestinal Disease, Organismal Injury and Abnormalities	Hyperplasia of pylorus	0.00255	AHR	1	Lipid Metabolism,Small Molecule Biochemistry	Activation of butyric acid	0.00123	FGF21	1
Cancer, Gastrointestinal Disease, Organismal Injury and Abnormalities	Hyperplasia of salivary gland	0.00255	RARB	1	Organismal Development	Volume of cerebrospinal fluid	0.00123	BDNF	1
Digestive System Development and Function, Organ Morphology, Organismal Development, Organismal Injury and Abnormalities, Tissue Morphology	Hypertrophy of gastric epithelium	0.00255	AHR	1	Digestive System Development and Function,Organ Morphology,Organismal Development,Tissue Morphology	Size of fungiform papillae	0.00123	BDNF	1
Cell Morphology, Cellular Assembly and Organization, Organismal Injury and Abnormalities, Tissue Morphology	Hypertrophy of perikaryon	0.00255	BDNF	1	Carbohydrate Metabolism	Quantity of fructosamine	0.00123	FGF21	1
Organ Morphology, Organismal Injury and Abnormalities	Hypertrophy of skin	0.00255	AHR	1	Cell Morphology,Nervous System Development and Function,Neurological Disease,Tissue Morphology	Abnormal morphology of adrenergic neurons	0.00123	BDNF	1
Developmental Disorder	Hypoplasia of first branchial arch	0.00255	RARB	1	Organismal Functions	Organismal shaking of mice	0.00123	BDNF	1
Developmental Disorder	Hypoplasia of second branchial arch	0.00255	RARB	1	Cell Death and Survival	Apoptosis of sperm	0.00123	BDNF	1
Cell-To-Cell Signaling and Interaction, Cellular Growth and Proliferation, Embryonic Development	Induction of mesenchymal stem cells	0.00255	BDNF	1	Amino Acid Metabolism,Small Molecule Biochemistry	Release of glutamine	0.00123	BDNF	1
Infectious Diseases	Infectivity of adenoviridae	0.00255	XPO1	1	Cellular Function and Maintenance,Nervous System Development and Function	Regulation of cortical neurons	0.00123	BDNF	1
Cellular Compromise, Dermatological Diseases and Conditions, Organismal Injury and Abnormalities	Injury of keratinocytes	0.00255	TRIM72	1	Ophthalmic Disease,Organismal Injury and Abnormalities	Dysfunction of lacrimal gland	0.00123	CYP1A1	1
Neurological Disease, Ophthalmic Disease	Injury of optic nerve	0.00255	BDNF	1	Hereditary Disorder,Neurological Disease,Nutritional Disease,Organismal Injury and Abnormalities,Psychological Disorders	Susceptibility to anorexia nervosa type 2	0.00123	BDNF	1
Cell Morphology, Nervous System Development and Function, Skeletal and Muscular System Development and Function	Innervation of airway smooth muscle cells	0.00255	BDNF	1	Cell Death and Survival,Nervous System Development and Function	Survival of mesencephalic neurons	0.00123	BDNF	1
Cell Morphology, Endocrine System Development and Function, Nervous System Development and Function	Innervation of pineal gland	0.00255	BDNF	1	Behavior,Nervous System Development and Function	Declarative memory	0.00123	BDNF	1
Cell Morphology, Cellular Movement, Nervous System Development and Function	Innervation of sympathetic preganglionic neurons	0.00255	BDNF	1	Carbohydrate Metabolism,Molecular Transport,Small Molecule Biochemistry	Deposition of chondroitin sulfate proteoglycan	0.00123	BDNF	1
Connective Tissue Disorders, Endocrine System Disorders, Metabolic Disease, Organismal Injury and Abnormalities	Insulin resistance of visceral fat	0.00255	TRIM72	1	Connective Tissue Development and Function,Organismal Development,Skeletal and Muscular System Development and Function,Tissue Development	Size of hip bone	0.00123	PLCL1	1
Carbohydrate Metabolism, Lipid Metabolism, Molecular Transport, Small Molecule Biochemistry	Localization of phosphatidylinositol-3,4,5-triphosphate	0.00255	BDNF	1	Cell Morphology,Nervous System Development and Function,Skeletal and Muscular System Development and Function	Innervation of airway smooth muscle cells	0.00123	BDNF	1
Cell-To-Cell Signaling and Interaction, Nervous System Development and Function	Long term depression of visual cortex	0.00255	BDNF	1	Cell Cycle,Cell Death and Survival	Chromosome condensation of pulmonary fibroblasts	0.00123	AHR	1
Cell Death and Survival, Cell Morphology, Hematological System Development and Function, Immunological Disease, Lymphoid Tissue Structure and Development	Loss of dendritic epidermal T cells	0.00255	AHR	1	Behavior	Task acquisition	0.00123	RARB	1
Nervous System Development and Function	Maintenance of nervous system	0.00255	BDNF	1	Cellular Movement,Hematological System Development and Function	Chemokinesis of hematopoietic cells	0.00123	BDNF	1
Cellular Development, Embryonic Development, Nervous System Development and Function, Organ Development, Organismal Development, Tissue Development	Maturation of medium spiny neurons	0.00255	BDNF	1	Cardiovascular System Development and Function,Tissue Morphology	Diameter of portal vein	0.00123	AHR	1
Cell Morphology, Cellular Development, Cellular Growth and Proliferation, Nervous System Development and Function, Organismal Development, Tissue Development	Morphogenesis of interneurons	0.00255	BDNF	1	Embryonic Development,Nervous System Development and Function,Organ Development,Organismal Development,Tissue Development	Formation of internal granular layer of cerebellum	0.00123	BDNF	1
Amino Acid Metabolism, Small Molecule Biochemistry	Neurotoxicity of L-glutamic acid	0.00255	BDNF	1	Developmental Disorder,Neurological Disease,Psychological Disorders	Autism spectrum disorder with intellectual disability	0.00123	SCN2A	1
Developmental Disorder, Hereditary Disorder, Ophthalmic Disease, Organismal Injury and Abnormalities	Optic disc anomalies with retinal and/or macular dystrophy	0.00255	SIX6	1	Cell Morphology,Connective Tissue Development and Function,Inflammatory Response,Organismal Injury and Abnormalities,Respiratory Disease,Tissue Morphology	Blebbing of pulmonary fibroblasts	0.00123	AHR	1
Organismal Functions	Organismal shaking of mice	0.00255	BDNF	1	Cellular Function and Maintenance,Nervous System Development and Function,Tissue Development	Hyperfunction of dopaminergic neurons	0.00123	BDNF	1
Cellular Development, Cellular Growth and Proliferation, Connective Tissue Development and Function, Skeletal and Muscular System Development and Function, Tissue Development	Osteoblastogenesis of bone marrow mesenchymal cell-derived osteoblasts	0.00255	FGF21	1	Developmental Disorder,Hereditary Disorder,Ophthalmic Disease,Organismal Injury and Abnormalities	Optic disc anomalies with retinal and/or macular dystrophy	0.00123	SIX6	1
Cardiovascular System Development and Function	Perfusion of liver lobule	0.00255	AHR	1	Cellular Compromise,Neurological Disease,Organismal Injury and Abnormalities	Dysfunction of dopaminergic neurons	0.00123	BDNF	1
Lipid Metabolism, Small Molecule Biochemistry, Vitamin and Mineral Metabolism	Production of 2-hydroxyestradiol	0.00255	CYP1A1	1	Gastrointestinal Disease,Organismal Injury and Abnormalities	Bowel urgency	0.00123	BDNF	1
Cellular Development, Cellular Growth and Proliferation, Hematological System Development and Function, Lymphoid Tissue Structure and Development	Proliferation of dendritic epidermal T cells	0.00255	AHR	1	Cardiovascular System Development and Function	Perfusion of liver lobule	0.00123	AHR	1
Cellular Development, Cellular Growth and Proliferation, Nervous System Development and Function, Organ Development, Tissue Development	Proliferation of striatal neurons	0.00255	BDNF	1	Cellular Function and Maintenance,Nervous System Development and Function,Tissue Development	Function of serotonergic neurons	0.00123	BDNF	1
Metabolic Disease, Psychological Disorders	Protection against nicotine dependence	0.00255	CYP2A6 (includes others)	1	Cellular Assembly and Organization,Nervous System Development and Function,Tissue Morphology	Density of intraganglionic laminar ending	0.00123	BDNF	1
Cellular Assembly and Organization, Cellular Function and Maintenance, Nervous System Development and Function, Tissue Morphology	Quantity of collateral branches	0.00255	BDNF	1	Tissue Morphology	Deficiency of mast cells	0.00123	AHR	1
Drug Metabolism, Endocrine System Development and Function, Lipid Metabolism, Molecular Transport, Small Molecule Biochemistry	Quantity of dexamethasone	0.00255	AHR	1	Cell-To-Cell Signaling and Interaction,Cellular Growth and Proliferation,Embryonic Development	Induction of mesenchymal stem cells	0.00123	BDNF	1
Carbohydrate Metabolism	Quantity of fructosamine	0.00255	FGF21	1	Cell-To-Cell Signaling and Interaction,Nervous System Development and Function	Long term synaptic depression of visual cortex	0.00123	BDNF	1
Digestive System Development and Function, Organ Morphology	Quantity of fungiform papillae	0.00255	BDNF	1	Cell Death and Survival,Nervous System Development and Function	Survival of vestibular ganglion neurons	0.00123	BDNF	1
Nervous System Development and Function, Tissue Morphology	Quantity of nodose ganglion neurons	0.00255	BDNF	1	Cell Death and Survival,Nervous System Development and Function	Survival of indirect pathway medium spiny projection neurons	0.00123	BDNF	1
Nervous System Development and Function, Tissue Morphology	Quantity of pre-oligodendrocytes	0.00255	BDNF	1	Cell Cycle	Cell cycle progression of embryonic cancer cell lines	0.00123	RARB	1
Cellular Assembly and Organization, Nervous System Development and Function, Tissue Morphology	Quantity of synaptic spine	0.00255	BDNF	1	Organ Morphology,Organismal Injury and Abnormalities	Hypertrophy of skin	0.00123	AHR	1
Molecular Transport	Reabsorption of bicarbonate	0.00255	SLC9A3	1	Cell Death and Survival,Nervous System Development and Function	Survival of projection neurons	0.00123	BDNF	1
Cellular Assembly and Organization, Cellular Movement, Nervous System Development and Function	Rearrangement of axons	0.00255	BDNF	1	Cellular Compromise,Neurological Disease,Organismal Injury and Abnormalities	Atrophy of striatonigral neurons	0.00123	BDNF	1
Cellular Function and Maintenance, Nervous System Development and Function	Regulation of cortical neurons	0.00255	BDNF	1	Nervous System Development and Function	Maintenance of nervous system	0.00123	BDNF	1
Cellular Development, Cellular Growth and Proliferation, Connective Tissue Development and Function, Hair and Skin Development and Function, Organ Development, Tissue Development	Reinitiation of proliferation of keratinocytes	0.00255	PRKD1	1	Connective Tissue Disorders,Organismal Injury and Abnormalities	Fibrosis of submucosa	0.00123	AHR	1
Amino Acid Metabolism, Small Molecule Biochemistry	Release of glutamine	0.00255	BDNF	1	Digestive System Development and Function,Organ Morphology,Organismal Development,Organismal Injury and Abnormalities,Tissue Morphology	Hypertrophy of gastric epithelium	0.00123	AHR	1
Cell-To-Cell Signaling and Interaction, Nervous System Development and Function	Response of retinal ganglion cells	0.00255	BDNF	1	Nervous System Development and Function,Tissue Morphology	Quantity of pre-oligodendrocytes	0.00123	BDNF	1
Digestive System Development and Function, Organ Morphology, Organismal Development, Tissue Morphology	Size of fungiform papillae	0.00255	BDNF	1	Cancer,Organismal Injury and Abnormalities	Genitourinary tumor	0.00124	ABHD12B,ADH1B,ADRA2C,AHR,CYP1A1,DCDC1,FGF21,FTO,HTR4,LRRN2,mir-128,MLIP,MLLT10,MLXIPL,NEGR1,NRXN3,PKHD1,PLCL1,RARB,SCN2A,SIX6,SLC4A7	22
Connective Tissue Development and Function, Organismal Development, Skeletal and Muscular System Development and Function, Tissue Development	Size of hip bone	0.00255	PLCL1	1	Cancer,Organismal Injury and Abnormalities,Reproductive System Disease	Tumorigenesis of reproductive tract	0.00124	ABHD12B,ADH1B,ADRA2C,AHR,CYP1A1,DCDC1,HTR4,LRRN2,mir-128,NEGR1,NRXN3,PKHD1,PLCL1,RARB,SCN2A,SIX6	16
Cell Morphology, Cellular Assembly and Organization, Nervous System Development and Function, Tissue Morphology	Size of synaptic vesicles pool	0.00255	SCAMP5	1	Neurological Disease	Degeneration of peripheral nervous system	0.00127	BDNF,SLC4A7	2
Endocrine System Development and Function, Lipid Metabolism, Small Molecule Biochemistry	Sulfation of testosterone	0.00255	CHST10	1	Cancer,Organismal Injury and Abnormalities,Reproductive System Disease	Female genital neoplasm	0.00127	ABHD12B,ADH1B,ADRA2C,AHR,CYP1A1,DCDC1,HTR4,LRRN2,mir-128,NEGR1,NRXN3,PKHD1,PLCL1,RARB,SCN2A,SIX6	16
Cell Death and Survival, Nervous System Development and Function	Survival of indirect pathway medium spiny projection neurons	0.00255	BDNF	1	Auditory and Vestibular System Development and Function,Auditory Disease,Organ Morphology,Organismal Development,Organismal Injury and Abnormalities	Abnormal morphology of ear	0.00134	BDNF,RARB,SLC4A7	3
Cell Death and Survival, Nervous System Development and Function	Survival of mesencephalic neurons	0.00255	BDNF	1	Lipid Metabolism,Molecular Transport,Small Molecule Biochemistry	Concentration of cholesterol	0.0014	AHR,BDNF,FGF21,MLXIPL	4
Cell Death and Survival, Nervous System Development and Function	Survival of projection neurons	0.00255	BDNF	1	Nervous System Development and Function	Sensory system development	0.00142	BDNF,FTO,RARB,SIX6,SLC4A7	5
Cell Death and Survival, Nervous System Development and Function	Survival of striatonigral neurons	0.00255	BDNF	1	Embryonic Development,Organismal Development,Tissue Development	Development of mesenchyme	0.00145	FGF21,RARB	2
Cell Death and Survival, Nervous System Development and Function	Survival of vestibular ganglion neurons	0.00255	BDNF	1	Organ Morphology,Organismal Development	Mass of genitourinary system	0.0015	AHR,FGF21,FTO,MLXIPL	4
Hereditary Disorder, Neurological Disease, Nutritional Disease, Organismal Injury and Abnormalities, Psychological Disorders	Susceptibility to anorexia nervosa type 2	0.00255	BDNF	1	Digestive System Development and Function,Gastrointestinal Disease,Organ Morphology,Organismal Development,Organismal Injury and Abnormalities	Abnormal morphology of colon	0.00151	AHR,BDNF	2
Hereditary Disorder, Nutritional Disease, Organismal Injury and Abnormalities, Psychological Disorders	Susceptibility to bulimia nervosa type 2	0.00255	BDNF	1	Endocrine System Development and Function,Lipid Metabolism,Small Molecule Biochemistry,Vitamin and Mineral Metabolism	Synthesis of estrogen	0.00151	AHR,CYP1A1	2
Nutritional Disease	Susceptibility to obesity type BMIQ14	0.00255	FTO	1	Embryonic Development,Nervous System Development and Function,Organ Development,Organ Morphology,Organismal Development,Tissue Development,Visual System Development and Function	Morphology of eye	0.00153	FTO,RARB,SIX6,SLC4A7	4
Cell-To-Cell Signaling and Interaction, Nervous System Development and Function	Synaptic transmission of GABA	0.00255	BDNF	1	Organismal Injury and Abnormalities	Discomfort	0.00159	ADRA2C,BDNF,HTR4,SCN2A	4
Developmental Disorder, Hereditary Disorder, Ophthalmic Disease, Organismal Injury and Abnormalities	Syndromic microphthalmia type 12	0.00255	RARB	1	Cancer,Hematological Disease,Organismal Injury and Abnormalities	Hematologic cancer	0.0016	ABHD12B,ADRA2C,AHR,BDNF,CYP1A1,GCKR,mir-128,MLLT10,MLXIPL,NRXN3,PKHD1,RARB,SCN2A	13
Amino Acid Metabolism, Small Molecule Biochemistry	Synthesis of beta-alanine	0.00255	UPB1	1	Cancer,Endocrine System Disorders,Organismal Injury and Abnormalities,Reproductive System Disease	Pituitary gland tumor	0.00166	ADRA2C,BDNF,HTR4	3
Gene Expression	Targeting of response element	0.00255	AHR	1	Endocrine System Disorders,Gastrointestinal Disease,Inflammatory Disease,Inflammatory Response,Organismal Injury and Abnormalities	Chronic pancreatitis	0.00178	AHR,CYP1A1	2
Behavior	Task acquisition	0.00255	RARB	1	Connective Tissue Development and Function,Skeletal and Muscular System Development and Function,Tissue Development	Mass of trabecular bone	0.00178	AHR,FGF21	2
Developmental Disorder	Teratogenesis	0.00255	AHR	1	Cell Morphology,Connective Tissue Development and Function,Tissue Morphology	Size of white adipocytes	0.00178	FGF21,FTO	2
Cardiovascular System Development and Function, Tissue Morphology	Thickness of portal vein	0.00255	AHR	1	Skeletal and Muscular System Development and Function	Length of skeleton	0.00178	CYP1A1,HTR4	2
Cancer, Gastrointestinal Disease, Organismal Injury and Abnormalities	Tumorigenesis of gastric gland	0.00255	AHR	1	Neurological Disease	Abnormality of vestibulocochlear nerve	0.00185	BDNF,SLC4A7	2
Cancer, Organismal Injury and Abnormalities	Tumorigenesis of lung cell lines	0.00255	PRKD1	1	Lipid Metabolism,Molecular Transport,Small Molecule Biochemistry	Concentration of triacylglycerol	0.0019	BDNF,FGF21,GCKR,MLXIPL	4
Organismal Development	Volume of cerebrospinal fluid	0.00255	BDNF	1	Cell Death and Survival	Apoptosis of retinal cells	0.00192	BDNF,SLC4A7	2
Behavior	Whisker-based object localization task learning	0.00255	PPP3R1	1	Endocrine System Development and Function,Molecular Transport,Small Molecule Biochemistry	Abnormal quantity of hormone	0.00192	AHR,FTO	2
Cancer, Organismal Injury and Abnormalities	Liquid tumor	0.00259	ABHD12B,ADRA2C,CYP1A1,FKBP8,GCKR,mir-128,MLLT10,NRXN3,PKHD1,PPP3R1,RARB,SCN2A,STK24,UPB1,XPO1	15	Cellular Development	Differentiation of neuroblastoma cell lines	0.00199	AHR,BDNF	2
Carbohydrate Metabolism, Molecular Transport	Quantity of glycogen	0.00259	FGF21,GCKR,MLXIPL	3	Cell-To-Cell Signaling and Interaction	Quantity of neurotransmitter	0.002	ADRA2C,BDNF,FGF21	3
Cancer, Gastrointestinal Disease, Organismal Injury and Abnormalities	Digestive system cancer	0.00262	ABHD12B,ADH1B,ADRA2C,AHR,AHSA2P,BDNF,CABCOCO1,CHCHD3,CHST10,CYP1A1,CYP2A6 (includes others),DCDC1,DCTPP1,FAM83B,FARP1,FGF21,FKBP8,FNDC4,FTO,GCKR,IZUMO1,KCTD13,LRRN2,MAMSTR,mir-128,MLIP,MLLT10,MLXIPL,NEGR1,NRBF2,NRXN3,NTN5,PKHD1,PLCL1,PPP3R1,PRKD1,RARB,RASIP1,SCAMP2,SCAMP5,SCN2A,SIX6,SLC4A7,SLC9A3,STK24,TRIM72,TSNARE1,XPO1	48	Endocrine System Disorders,Gastrointestinal Disease,Inflammatory Disease,Inflammatory Response,Organismal Injury and Abnormalities	Inflammation of pancreas	0.002	ADRA2C,AHR,CYP1A1	3
Connective Tissue Development and Function, Skeletal and Muscular System Development and Function, Tissue Development	Size of bone	0.00274	AHR,CYP1A1,FGF21,HTR4,PLCL1	5	Immunological Disease,Organismal Injury and Abnormalities	Abnormality of thymus gland	0.00203	AHR,CYP1A1,RARB	3
Cellular Function and Maintenance, Molecular Transport	Exocytosis	0.00277	PLCL1,SCAMP2,SCAMP5,TRIM72	4	Tissue Morphology	Quantity of epithelial tissue	0.00205	BDNF,FTO,RARB	3
Lipid Metabolism, Small Molecule Biochemistry	Homeostasis of triacylglycerol	0.00284	FGF21,GCKR	2	Cardiovascular System Development and Function,Tissue Morphology	Morphology of vein	0.00206	AHR,RARB	2
Neurological Disease, Psychological Disorders	Pervasive developmental disorder	0.003	ADRA2C,HTR4,SCAMP5,SCN2A	4	Connective Tissue Development and Function,Organ Morphology,Organismal Development,Reproductive System Development and Function	Mass of epigonadal fat pad	0.00206	FGF21,FTO	2
Lipid Metabolism, Molecular Transport, Small Molecule Biochemistry	Concentration of lipid	0.00303	AHR,BDNF,CHST10,CYP1A1,FGF21,GCKR,MLXIPL,NRBF2,SLC9A3	9	Metabolic Disease	Glucose metabolism disorder	0.00211	ADRA2C,BDNF,FGF21,FTO,GCKR,HTR4,MLXIPL,PLCL1	8
Embryonic Development, Organ Development, Organismal Development, Renal and Urological System Development and Function, Tissue Development	Formation of kidney	0.00314	AHR,BDNF,FGF21,PKHD1,RARB	5	Nutritional Disease,Psychological Disorders	Eating Disorders	0.00214	BDNF,FTO,HTR4	3
Dermatological Diseases and Conditions, Organismal Injury and Abnormalities	Damage of skin	0.00321	AHR,TRIM72	2	Connective Tissue Development and Function,Connective Tissue Disorders,Organ Morphology,Organismal Development,Organismal Injury and Abnormalities,Skeletal and Muscular Disorders,Skeletal and Muscular System Development and Function,Tissue Development	Abnormal morphology of temporal bone	0.00214	RARB,SLC4A7	2
Gastrointestinal Disease, Organismal Injury and Abnormalities	Benign oral disorder	0.00323	ADRA2C,AHR,FTO,MLIP,PPP3R1,TMEM107	6	Cancer,Gastrointestinal Disease,Organismal Injury and Abnormalities	Hyperplasia of gastrointestinal tract	0.00214	AHR,RARB	2
Cancer, Hematological Disease, Immunological Disease, Organismal Injury and Abnormalities	Leukemia	0.0034	ABHD12B,ADRA2C,CYP1A1,FKBP8,GCKR,MLLT10,NRXN3,PKHD1,PPP3R1,RARB,SCN2A,STK24,UPB1,XPO1	14	Cell-To-Cell Signaling and Interaction,Small Molecule Biochemistry	Synthesis of neurotransmitter	0.00221	AHR,BDNF	2
Cancer, Hematological Disease, Immunological Disease, Organismal Injury and Abnormalities	PML-RARA mutation positive adult acute myeloid leukemia	0.0034	PPP3R1,RARB	2	Cancer,Organismal Injury and Abnormalities,Reproductive System Disease	Mammary tumor	0.00226	ADRA2C,CYP1A1,FTO,LRRN2,mir-128,MLIP,PKHD1,RARB,SCN2A,SIX6,SLC4A7	11
Cancer, Hematological Disease, Organismal Injury and Abnormalities	Myeloproliferative disorder	0.00342	ADRA2C,MLLT10,PPP3R1,RARB,STK24	5	Psychological Disorders	Alcohol abuse	0.00229	ADRA2C,SCN2A	2
Hereditary Disorder, Neurological Disease, Organismal Injury and Abnormalities, Psychological Disorders, Skeletal and Muscular Disorders	Huntington's Disease	0.00346	ADRA2C,BDNF,KCTD13,PPP3R1,RARB,SCAMP5,SCN2A	7	Neurological Disease,Psychological Disorders	Obsessive-compulsive disorder	0.00229	ADRA2C,BDNF	2
Connective Tissue Disorders, Developmental Disorder, Gastrointestinal Disease, Organismal Development, Organismal Injury and Abnormalities, Skeletal and Muscular Disorders	Congenital malformation of face	0.00348	ADRA2C,AHR,FTO,TMEM107	4	Connective Tissue Development and Function,Skeletal and Muscular System Development and Function,Tissue Development	Morphology of trabecular bone	0.00235	AHR,FGF21,PLCL1	3
Organ Morphology, Organismal Development	Mass of genitourinary system	0.0035	AHR,CHST10,FGF21,FTO,MLXIPL	5	Nervous System Development and Function	Electrophysiology of nervous system	0.00237	PLCL1,SCN2A	2
Endocrine System Development and Function, Molecular Transport, Protein Synthesis, Small Molecule Biochemistry	Quantity of insulin in blood	0.00353	BDNF,FGF21,GCKR,MLXIPL	4	Connective Tissue Development and Function,Skeletal and Muscular System Development and Function	Bone mineral density	0.00238	FTO,HTR4,PLCL1	3
Behavior, Psychological Disorders	Irritable behavior	0.00361	ADRA2C,SCN2A	2	Cancer,Gastrointestinal Disease,Hepatic System Disease,Organismal Injury and Abnormalities	Biliary tract adenocarcinoma	0.00244	ADH1B,PKHD1,SCN2A	3
Drug Metabolism, Lipid Metabolism, Small Molecule Biochemistry, Vitamin and Mineral Metabolism	Metabolism of tretinoin	0.00361	AHR,CYP1A1	2	Cell-To-Cell Signaling and Interaction,Cellular Growth and Proliferation,Nervous System Development and Function	Excitation of dopaminergic neurons	0.00245	BDNF	1
Cancer, Hematological Disease, Organismal Injury and Abnormalities	Bone marrow cancer	0.00368	ABHD12B,ADRA2C,FKBP8,GCKR,mir-128,MLLT10,PKHD1,PPP3R1,RARB,STK24,UPB1,XPO1	12	Developmental Disorder,Hereditary Disorder,Neurological Disease,Organismal Injury and Abnormalities	Malignant migrating partial seizures of early infancy syndrome	0.00245	SCN2A	1
Cell Morphology, Tissue Morphology	Morphology of connective tissue cells	0.00372	AHR,BDNF,FGF21,FTO,SLC4A7	5	Cell Morphology,Cell-To-Cell Signaling and Interaction,Cellular Function and Maintenance,Nervous System Development and Function	Depolarization of Purkinje cells	0.00245	BDNF	1
Digestive System Development and Function	Morphology of digestive system	0.00373	AHR,BDNF,CYP1A1,FGF21,MLXIPL,PKHD1,RARB,SLC9A3	8	Gastrointestinal Disease,Hepatic System Disease,Organismal Injury and Abnormalities	Fibrosis of liver portal space	0.00245	AHR	1
Cancer, Hematological Disease, Organismal Injury and Abnormalities	Hematologic cancer	0.00375	ABHD12B,ADRA2C,AHR,BDNF,CYP1A1,CYP2A6 (includes others),FKBP8,GCKR,mir-128,MLLT10,MLXIPL,NRXN3,PKHD1,PPP3R1,RARB,SCN2A,STK24,UPB1,XPO1	19	Neurological Disease,Ophthalmic Disease	Injury of optic nerve	0.00245	BDNF	1
Cell Morphology, Hair and Skin Development and Function, Organ Morphology, Tissue Morphology	Morphology of keratinocytes	0.00381	AHR,BDNF	2	Dermatological Diseases and Conditions,Neurological Disease,Organismal Injury and Abnormalities	Paresthesia	0.00245	BDNF	1
Organismal Injury and Abnormalities	Bleeding	0.00398	ADRA2C,BDNF,HTR4,PPP3R1,RARB,RASIP1	6	Endocrine System Development and Function,Molecular Transport,Small Molecule Biochemistry	Concentration of glucagon	0.00245	FGF21	1
Behavior, Nervous System Development and Function	Spatial memory	0.00401	ADRA2C,BDNF,BRINP1	3	Cellular Development,Cellular Growth and Proliferation,Nervous System Development and Function,Tissue Development	Generation of medium spiny neurons	0.00245	BDNF	1
Behavior, Digestive System Development and Function	Abnormal feeding	0.00402	BDNF,FTO	2	Cell Morphology,Cellular Assembly and Organization,Cellular Development,Cellular Function and Maintenance,Cellular Growth and Proliferation,Nervous System Development and Function,Organismal Development,Tissue Development	Sprouting of cholinergic neurons	0.00245	BDNF	1
Cell-To-Cell Signaling and Interaction, Drug Metabolism, Molecular Transport, Small Molecule Biochemistry	Secretion of norepinephrine	0.00402	ADRA2C,PLCL1	2	Nervous System Development and Function,Tissue Morphology	Volume of gray matter	0.00245	BDNF	1
Hereditary Disorder, Neurological Disease, Organismal Injury and Abnormalities, Psychological Disorders	Schizoaffective disorder	0.0041	ADRA2C,RARB,SCN2A	3	Cellular Assembly and Organization,Cellular Function and Maintenance,Nervous System Development and Function,Tissue Morphology	Quantity of primary dendrite	0.00245	BDNF	1
Digestive System Development and Function	Ingestion by rodents	0.00419	BDNF,FGF21,FTO,HTR4	4	Cell Morphology,Cellular Movement,Nervous System Development and Function	Innervation of sympathetic neurites	0.00245	BDNF	1
Cancer, Hematological Disease, Organismal Injury and Abnormalities	Myelodysplastic syndrome	0.00439	ADRA2C,mir-128,PPP3R1,RARB,XPO1	5	Cell Morphology,Cellular Assembly and Organization,Nervous System Development and Function,Tissue Morphology	Volume of nerve ending	0.00245	BDNF	1
Cardiovascular System Development and Function, Tissue Morphology	Morphology of vein	0.00446	AHR,RARB	2	Cell Death and Survival,Nervous System Development and Function	Survival of serotonergic neurons	0.00245	BDNF	1
Cancer, Dermatological Diseases and Conditions, Organismal Injury and Abnormalities	Hyperplasia of epidermis	0.00448	AHR,PLCL1,RARB	3	Cellular Growth and Proliferation	Cytostasis of squamous cell carcinoma cell lines	0.00245	RARB	1
Cancer, Hematological Disease, Organismal Injury and Abnormalities	Myelodysplastic-myeloproliferative disease	0.00448	ADRA2C,PPP3R1,RARB	3	Carbohydrate Metabolism,Lipid Metabolism,Molecular Transport,Small Molecule Biochemistry	Localization of phosphatidylinositol-3,4,5-triphosphate	0.00245	BDNF	1
Skeletal and Muscular System Development and Function	Morphology of axial skeleton	0.0046	CYP1A1,FKBP8,PLCL1,RARB	4	Connective Tissue Disorders,Developmental Disorder,Organismal Injury and Abnormalities,Skeletal and Muscular Disorders	Dysplasia of femur	0.00245	HTR4	1
Embryonic Development, Organismal Development, Tissue Development	Expansion of embryonic tissue	0.00469	AHR,HTR4	2	Cell-To-Cell Signaling and Interaction,Nervous System Development and Function	Initiation of long-term potentiation	0.00245	BDNF	1
Developmental Disorder, Hereditary Disorder, Neurological Disease, Organismal Injury and Abnormalities	Fragile X syndrome	0.00469	ADRA2C,SCN2A	2	Embryonic Development,Organismal Development,Tissue Development	Closure of ductus venosus	0.00245	AHR	1
Cardiovascular Disease, Cardiovascular System Development and Function, Organismal Injury and Abnormalities	Abnormal morphology of vasculature	0.00475	AHR,PPP3R1,RARB,RASIP1,SLC4A7	5	Cell Morphology,Connective Tissue Development and Function,Tissue Morphology	Abnormal morphology of type I fibrocytes	0.00245	SLC4A7	1
Cancer, Gastrointestinal Disease, Organismal Injury and Abnormalities	Intestinal carcinoma	0.00481	ABHD12B,ADRA2C,AHR,AHSA2P,BDNF,CHCHD3,CHST10,CYP2A6 (includes others),DCDC1,DCTPP1,FAM83B,FARP1,FGF21,FKBP8,FNDC4,FTO,GCKR,IZUMO1,KCTD13,LRRN2,MAMSTR,MLLT10,MLXIPL,NEGR1,NRBF2,NRXN3,NTN5,PKHD1,PLCL1,PPP3R1,PRKD1,RARB,RASIP1,SCAMP2,SCAMP5,SCN2A,SIX6,SLC4A7,SLC9A3,TRIM72,TSNARE1,XPO1	42	Cellular Development,Cellular Growth and Proliferation	Arrest in growth of embryonic cancer cell lines	0.00245	RARB	1
Digestive System Development and Function, Embryonic Development, Hepatic System Development and Function, Organ Development, Organismal Development, Tissue Development	Development of liver	0.00487	AHR,PKHD1,UPB1	3	Embryonic Development,Nervous System Development and Function,Organ Development,Organismal Development,Tissue Development	Neurogenesis of striatum	0.00245	BDNF	1
Endocrine System Development and Function, Molecular Transport, Protein Synthesis, Small Molecule Biochemistry	Quantity of IGF1 in blood	0.00492	FGF21,FTO	2	Cardiovascular Disease,Organismal Injury and Abnormalities	Hypertension of aorta	0.00245	AHR	1
Connective Tissue Development and Function, Tissue Morphology	Quantity of fibroblasts	0.00492	AHR,RARB	2	Small Molecule Biochemistry	Metabolism of clopidogrel	0.00245	CYP1A1	1
Cancer, Hematological Disease, Immunological Disease, Organismal Injury and Abnormalities	T(15;17) mutation negative acute myeloid leukemia	0.00492	PPP3R1,RARB	2	Nervous System Development and Function,Neurological Disease	Abnormal morphology of vestibular nerve	0.00245	BDNF	1
Digestive System Development and Function, Gastrointestinal Disease, Organ Morphology, Organismal Development, Organismal Injury and Abnormalities	Abnormal morphology of circumvallate papillae	0.0051	BDNF	1	Cancer	Sphere formation of brain cancer cell lines	0.00245	BDNF	1
Cardiovascular System Development and Function, Digestive System Development and Function, Gastrointestinal Disease, Hepatic System Development and Function, Hepatic System Disease, Organismal Development, Organismal Injury and Abnormalities, Tissue Morphology	Abnormal morphology of dilated bile duct	0.0051	PKHD1	1	Drug Metabolism	Generation of riluzole	0.00245	CYP1A1	1
Organismal Development, Organismal Injury and Abnormalities, Respiratory Disease, Respiratory System Development and Function	Abnormal morphology of primary bronchus	0.0051	RARB	1	Neurological Disease	Onset of motor incoordination	0.00245	BDNF	1
Cell Morphology, Connective Tissue Development and Function, Tissue Morphology	Abnormal morphology of type I fibrocytes	0.0051	SLC4A7	1	Small Molecule Biochemistry	Metabolism of dibenzo(1,4)dioxin	0.00245	CYP1A1	1
Nervous System Development and Function, Neurological Disease	Abnormal morphology of vestibular nerve	0.0051	BDNF	1	Cell Death and Survival	Delay in cell death of photoreceptors	0.00245	BDNF	1
Cell-To-Cell Signaling and Interaction, Nervous System Development and Function	Activation of hippocampal neurons	0.0051	BDNF	1	Cellular Assembly and Organization,Nervous System Development and Function,Tissue Morphology	Quantity of axon branches	0.00245	BDNF	1
Cell-To-Cell Signaling and Interaction, Nervous System Development and Function	Activation of striatal neurons	0.0051	BDNF	1	Cell-To-Cell Signaling and Interaction	Responsiveness of fibroblast cell lines	0.00245	FGF21	1
Cell-To-Cell Signaling and Interaction, Nervous System Development and Function	Aggregation of Cajal-Retzius neurons	0.0051	BDNF	1	Cell-To-Cell Signaling and Interaction,Nervous System Development and Function	Excitatory postsynaptic potential of dorsal root	0.00245	BDNF	1
Cell-To-Cell Signaling and Interaction	Aggregation of prostate cancer cell lines	0.0051	PRKD1	1	Cell Death and Survival,Nervous System Development and Function	Survival of olfactory receptor neurons	0.00245	BDNF	1
Cellular Development, Cellular Growth and Proliferation	Arrest in growth of embryonic cancer cell lines	0.0051	RARB	1	Cell-To-Cell Signaling and Interaction,Nervous System Development and Function	Activation of striatal neurons	0.00245	BDNF	1
Cellular Compromise, Neurological Disease, Organismal Injury and Abnormalities	Atrophy of dopaminergic neurons	0.0051	BDNF	1	Hereditary Disorder,Neurological Disease,Organismal Injury and Abnormalities	Benign familial infantile seizures 3	0.00245	SCN2A	1
Cellular Compromise, Neurological Disease, Organismal Injury and Abnormalities	Atrophy of rubrospinal neurons	0.0051	BDNF	1	Digestive System Development and Function,Gastrointestinal Disease	Lack of anal canal	0.00245	RARB	1
Hereditary Disorder, Neurological Disease, Organismal Injury and Abnormalities	Benign familial infantile seizures 3	0.0051	SCN2A	1	Endocrine System Disorders,Metabolic Disease,Organismal Injury and Abnormalities	Cushing syndrome due to adrenocorticotropin-independent bilateral macronodular adrenal hyperplasia	0.00245	HTR4	1
Cell Morphology, Connective Tissue Development and Function, Skeletal and Muscular System Development and Function, Tissue Development	Cellularity of bone	0.0051	HTR4	1	Cell-To-Cell Signaling and Interaction,Nervous System Development and Function	Synaptic fatigue of synapse	0.00245	BDNF	1
Embryonic Development, Organismal Development, Tissue Development	Closure of ductus venosus	0.0051	AHR	1	Lipid Metabolism,Small Molecule Biochemistry	Demethylation of 2-hydroxyestradiol	0.00245	CYP1A1	1
Endocrine System Disorders, Metabolic Disease, Organismal Injury and Abnormalities	Cushing syndrome due to adrenocorticotropin-independent bilateral macronodular adrenal hyperplasia	0.0051	HTR4	1	Embryonic Development,Tissue Morphology	Quantity of ureteric bud branch	0.00245	RARB	1
Developmental Disorder, Hereditary Disorder, Metabolic Disease, Organismal Injury and Abnormalities	Cystathionine beta-synthase deficiency	0.0051	PKHD1	1	Cancer,Organismal Injury and Abnormalities,Reproductive System Disease	Latency of mammary tumor	0.00245	SLC4A7	1
Cellular Growth and Proliferation	Cytostasis of squamous cell carcinoma cell lines	0.0051	RARB	1	Digestive System Development and Function,Gastrointestinal Disease,Organ Morphology,Organismal Development,Organismal Injury and Abnormalities	Abnormal morphology of circumvallate papillae	0.00245	BDNF	1
Cellular Compromise, Organismal Injury and Abnormalities	Degeneration of spermatocytes	0.0051	AHR	1	Digestive System Development and Function,Organ Morphology,Organismal Development	Size of circumvallate taste bud	0.00245	BDNF	1
Cell Death and Survival	Delay in cell death of photoreceptors	0.0051	BDNF	1	Developmental Disorder,Hereditary Disorder,Metabolic Disease,Organismal Injury and Abnormalities	Cystathionine beta-synthase deficiency	0.00245	PKHD1	1
Lipid Metabolism, Small Molecule Biochemistry	Demethylation of 2-hydroxyestradiol	0.0051	CYP1A1	1	Cell Morphology,Cellular Function and Maintenance	Depolarization of neuroblastoma cell lines	0.00245	BDNF	1
Cell Morphology, Cell-To-Cell Signaling and Interaction, Cellular Function and Maintenance, Nervous System Development and Function	Depolarization of Purkinje cells	0.0051	BDNF	1	Cellular Compromise,Neurological Disease,Organismal Injury and Abnormalities	Atrophy of dopaminergic neurons	0.00245	BDNF	1
Cell Morphology, Cellular Function and Maintenance	Depolarization of neuroblastoma cell lines	0.0051	BDNF	1	Cell Morphology,Organismal Injury and Abnormalities,Tissue Morphology	Hypertrophy of dopaminergic neurons	0.00245	BDNF	1
Embryonic Development, Organismal Development, Tissue Development	Development of marginal zone	0.0051	BDNF	1	Cell-To-Cell Signaling and Interaction,Nervous System Development and Function	Activation of hippocampal neurons	0.00245	BDNF	1
Cellular Development, Cellular Growth and Proliferation, Embryonic Development, Organismal Development, Tissue Development	Development of zygote	0.0051	BDNF	1	Energy Production,Small Molecule Biochemistry	Oxidation of lactic acid	0.00245	MLXIPL	1
Connective Tissue Disorders, Developmental Disorder, Organismal Injury and Abnormalities, Skeletal and Muscular Disorders	Dysplasia of femur	0.0051	HTR4	1	Cellular Function and Maintenance,Nervous System Development and Function,Tissue Development	Function of motor neurons	0.00245	BDNF	1
Cell-To-Cell Signaling and Interaction, Cellular Growth and Proliferation, Nervous System Development and Function	Excitation of dentate granule cells	0.0051	BDNF	1	Cell Death and Survival,Nervous System Development and Function	Recovery of serotonergic neurons	0.00245	BDNF	1
Cell-To-Cell Signaling and Interaction, Cellular Growth and Proliferation, Nervous System Development and Function	Excitation of dopaminergic neurons	0.0051	BDNF	1	Cardiovascular Disease,Developmental Disorder,Organismal Injury and Abnormalities	Persistence of ductus venosus	0.00245	AHR	1
Cell-To-Cell Signaling and Interaction, Cellular Growth and Proliferation, Nervous System Development and Function	Excitation of interneurons	0.0051	BDNF	1	Drug Metabolism,Small Molecule Biochemistry	Metabolism of ketoconazole	0.00245	CYP1A1	1
Cell-To-Cell Signaling and Interaction, Cellular Growth and Proliferation, Nervous System Development and Function	Excitation of noradrenergic neurons	0.0051	BDNF	1	Lipid Metabolism,Molecular Transport,Small Molecule Biochemistry,Vitamin and Mineral Metabolism	Quantity of retinyl palmitate	0.00245	AHR	1
Cell-To-Cell Signaling and Interaction, Nervous System Development and Function	Excitatory postsynaptic potential of dorsal root	0.0051	BDNF	1	Cell Cycle,Reproductive System Development and Function	Mitogenesis of granulosa cells	0.00245	AHR	1
Cellular Development, Cellular Growth and Proliferation, Embryonic Development, Nervous System Development and Function, Organ Development, Organismal Development, Tissue Development	Expansion of neural precursor cells	0.0051	AHR	1	Cellular Compromise,Organismal Injury and Abnormalities	Degeneration of spermatocytes	0.00245	AHR	1
Gastrointestinal Disease, Hepatic System Disease, Organismal Injury and Abnormalities	Fibrosis of liver portal space	0.0051	AHR	1	Cellular Development,Cellular Growth and Proliferation,Embryonic Development,Organismal Development,Tissue Development	Development of zygote	0.00245	BDNF	1
Cardiovascular Disease, Organismal Injury and Abnormalities	Fibrosis of portal vein	0.0051	AHR	1	Cell Morphology,Connective Tissue Development and Function,Skeletal and Muscular System Development and Function,Tissue Development	Cellularity of bone	0.00245	HTR4	1
Cellular Function and Maintenance, Nervous System Development and Function, Tissue Development	Function of motor neurons	0.0051	BDNF	1	Cellular Compromise,Neurological Disease,Organismal Injury and Abnormalities	Atrophy of rubrospinal neurons	0.00245	BDNF	1
Cellular Development, Cellular Growth and Proliferation, Nervous System Development and Function, Tissue Development	Generation of medium spiny neurons	0.0051	BDNF	1	Cell-To-Cell Signaling and Interaction	Responsiveness of brown adipocytes	0.00245	FGF21	1
Drug Metabolism	Generation of riluzole	0.0051	CYP1A1	1	Cellular Assembly and Organization,Cellular Function and Maintenance,Nervous System Development and Function,Tissue Morphology	Quantity of basal dendrites	0.00245	BDNF	1
Cardiovascular Disease, Organismal Injury and Abnormalities	Hypertension of aorta	0.0051	AHR	1	Cellular Development,Cellular Growth and Proliferation,Hematological System Development and Function,Lymphoid Tissue Structure and Development	Proliferation of dendritic epidermal T cells	0.00245	AHR	1
Cell Morphology, Organismal Injury and Abnormalities, Tissue Morphology	Hypertrophy of dopaminergic neurons	0.0051	BDNF	1	Cell-To-Cell Signaling and Interaction,Cellular Growth and Proliferation,Nervous System Development and Function	Excitation of dentate granule cells	0.00245	BDNF	1
Infectious Diseases	Infection by Norovirus	0.0051	FUT2	1	Cell-To-Cell Signaling and Interaction,Nervous System Development and Function	Posttetanic potentiation of hippocampal neurons	0.00245	BDNF	1
Cell-To-Cell Signaling and Interaction, Nervous System Development and Function	Initiation of long-term potentiation	0.0051	BDNF	1	Cell-To-Cell Signaling and Interaction,Nervous System Development and Function	Aggregation of Cajal-Retzius neurons	0.00245	BDNF	1
Cell Morphology, Cellular Movement, Nervous System Development and Function	Innervation of sympathetic neurites	0.0051	BDNF	1	Cancer,Cellular Development,Cellular Growth and Proliferation,Organismal Injury and Abnormalities,Tissue Morphology,Tumor Morphology	Quantity of neuroblastoma cells	0.00245	RARB	1
Digestive System Development and Function, Gastrointestinal Disease	Lack of anal canal	0.0051	RARB	1	Cellular Development,Cellular Growth and Proliferation,Connective Tissue Development and Function,Embryonic Development,Organismal Development,Skeletal and Muscular System Development and Function,Tissue Development	Osteoblastogenesis of mesenchymal stem cells	0.00245	FGF21	1
Cancer, Organismal Injury and Abnormalities, Reproductive System Disease	Latency of mammary tumor	0.0051	SLC4A7	1	Cellular Development,Cellular Growth and Proliferation,Nervous System Development and Function,Tissue Development	Proliferation of serotonergic neurons	0.00245	BDNF	1
Developmental Disorder, Hereditary Disorder, Neurological Disease, Organismal Injury and Abnormalities	Malignant migrating partial seizures of early infancy syndrome	0.0051	SCN2A	1	Cellular Development,Cellular Growth and Proliferation,Embryonic Development,Nervous System Development and Function,Organ Development,Organismal Development,Tissue Development	Expansion of neural precursor cells	0.00245	AHR	1
Small Molecule Biochemistry	Metabolism of cisapride	0.0051	CYP2A6 (includes others)	1	Cell Death and Survival,Nervous System Development and Function	Survival of noradrenergic neurons	0.00245	BDNF	1
Small Molecule Biochemistry	Metabolism of clopidogrel	0.0051	CYP1A1	1	RNA Damage and Repair,RNA Post-Transcriptional Modification	Repair of RNA	0.00245	FTO	1
Small Molecule Biochemistry	Metabolism of dibenzo(1,4)dioxin	0.0051	CYP1A1	1	Organismal Development,Organismal Injury and Abnormalities,Respiratory Disease,Respiratory System Development and Function	Abnormal morphology of primary bronchus	0.00245	RARB	1
Drug Metabolism	Metabolism of halothane	0.0051	CYP2A6 (includes others)	1	Embryonic Development,Organismal Development,Tissue Development	Development of marginal zone	0.00245	BDNF	1
Drug Metabolism, Small Molecule Biochemistry	Metabolism of ketoconazole	0.0051	CYP1A1	1	Cardiovascular Disease,Organismal Injury and Abnormalities	Fibrosis of portal vein	0.00245	AHR	1
Drug Metabolism, Small Molecule Biochemistry	Metabolism of nicotine	0.0051	CYP2A6 (includes others)	1	Cell-To-Cell Signaling and Interaction,Cellular Growth and Proliferation,Nervous System Development and Function	Excitation of noradrenergic neurons	0.00245	BDNF	1
Cell Cycle, Reproductive System Development and Function	Mitogenesis of granulosa cells	0.0051	AHR	1	Digestive System Development and Function,Nervous System Development and Function,Organ Morphology,Tissue Morphology	Quantity of taste receptor cells	0.00245	BDNF	1
Embryonic Development, Nervous System Development and Function, Organ Development, Organismal Development, Tissue Development	Neurogenesis of striatum	0.0051	BDNF	1	Cell-To-Cell Signaling and Interaction,Nervous System Development and Function	Response of projection neurons	0.00245	BDNF	1
Neurological Disease	Onset of motor incoordination	0.0051	BDNF	1	Nervous System Development and Function,Tissue Morphology	Quantity of noradrenergic neurons	0.00245	BDNF	1
Gastrointestinal Disease	Opioid induced constipation	0.0051	HTR4	1	Cell Morphology,Cellular Assembly and Organization,Cellular Development,Cellular Function and Maintenance,Cellular Growth and Proliferation,Embryonic Development,Nervous System Development and Function,Organismal Development,Tissue Development	Sprouting of basal dendrites	0.00245	BDNF	1
Cellular Development, Cellular Growth and Proliferation, Connective Tissue Development and Function, Embryonic Development, Organismal Development, Skeletal and Muscular System Development and Function, Tissue Development	Osteoblastogenesis of mesenchymal stem cells	0.0051	FGF21	1	Cell-To-Cell Signaling and Interaction,Nervous System Development and Function	Response of hippocampal neurons	0.00245	BDNF	1
Energy Production, Small Molecule Biochemistry	Oxidation of lactic acid	0.0051	MLXIPL	1	Nervous System Development and Function	Taste response of chorda tympani	0.00245	BDNF	1
Dermatological Diseases and Conditions, Neurological Disease, Organismal Injury and Abnormalities	Paresthesia	0.0051	BDNF	1	Gastrointestinal Disease,Organismal Injury and Abnormalities	Bleeding of gastrointestinal tract	0.00253	ADRA2C,HTR4	2
Cardiovascular Disease, Developmental Disorder, Organismal Injury and Abnormalities	Persistence of ductus venosus	0.0051	AHR	1	Connective Tissue Development and Function,Tissue Morphology	Quantity of brown adipose tissue	0.00253	FGF21,MLXIPL	2
Cell-To-Cell Signaling and Interaction, Nervous System Development and Function	Posttetanic potentiation of hippocampal neurons	0.0051	BDNF	1	Nervous System Development and Function,Organ Morphology,Organismal Development	Morphology of mesencephalon	0.00253	BDNF,FTO	2
Cellular Development, Cellular Growth and Proliferation, Nervous System Development and Function, Tissue Development	Proliferation of serotonergic neurons	0.0051	BDNF	1	Embryonic Development,Organ Development,Organismal Development,Tissue Development	Development of sensory organ	0.00269	BDNF,FTO,RARB,SIX6,SLC4A7	5
Cellular Assembly and Organization, Nervous System Development and Function, Tissue Morphology	Quantity of axon branches	0.0051	BDNF	1	Cell Signaling,Vitamin and Mineral Metabolism	Signaling of Ca2+	0.0027	AHR,PLCL1	2
Cellular Assembly and Organization, Cellular Function and Maintenance, Nervous System Development and Function, Tissue Morphology	Quantity of basal dendrites	0.0051	BDNF	1	Cell Death and Survival,Cellular Compromise,Neurological Disease,Tissue Morphology	Neurodegeneration of sensory neurons	0.0027	BDNF,SLC4A7	2
Cancer, Cellular Development, Cellular Growth and Proliferation, Organismal Injury and Abnormalities, Tissue Morphology, Tumor Morphology	Quantity of neuroblastoma cells	0.0051	RARB	1	Behavior	Locomotion	0.0027	BDNF,FGF21,NEGR1,RARB	4
Nervous System Development and Function, Tissue Morphology	Quantity of noradrenergic neurons	0.0051	BDNF	1	Cell Signaling,Molecular Transport,Nucleic Acid Metabolism,Small Molecule Biochemistry	Concentration of cyclic AMP	0.00273	AHR,BDNF,HTR4	3
Cellular Assembly and Organization, Cellular Function and Maintenance, Nervous System Development and Function, Tissue Morphology	Quantity of primary dendrite	0.0051	BDNF	1	Organismal Development	Abnormal morphology of body cavity	0.00273	ADRA2C,AHR,BDNF,CYP1A1,MLIP,MLLT10,PKHD1,RARB	8
Lipid Metabolism, Molecular Transport, Small Molecule Biochemistry, Vitamin and Mineral Metabolism	Quantity of retinyl palmitate	0.0051	AHR	1	Cancer,Cardiovascular Disease,Organismal Injury and Abnormalities	Vascular tumor	0.0028	BDNF,NRXN3,RARB	3
Digestive System Development and Function, Nervous System Development and Function, Organ Morphology, Tissue Morphology	Quantity of taste receptor cells	0.0051	BDNF	1	Organismal Injury and Abnormalities	Fibrosis	0.00281	ADRA2C,AHR,mir-128,MLIP,PKHD1	5
Embryonic Development, Tissue Morphology	Quantity of ureteric bud branch	0.0051	RARB	1	Respiratory System Development and Function	Function of respiratory system	0.00287	FTO,RARB	2
Cell Death and Survival, Nervous System Development and Function	Recovery of serotonergic neurons	0.0051	BDNF	1	Cellular Development,Cellular Growth and Proliferation,Connective Tissue Development and Function,Skeletal and Muscular System Development and Function,Tissue Development	Osteoclastogenesis of bone cells	0.00287	AHR,CYP1A1	2
RNA Damage and Repair, RNA Post-Transcriptional Modification	Repair of RNA	0.0051	FTO	1	Cell-To-Cell Signaling and Interaction,Drug Metabolism,Molecular Transport,Small Molecule Biochemistry	Concentration of norepinephrine	0.00287	ADRA2C,FGF21	2
Cell-To-Cell Signaling and Interaction, Nervous System Development and Function	Response of hippocampal neurons	0.0051	BDNF	1	Lipid Metabolism,Molecular Transport,Small Molecule Biochemistry	Concentration of lipid	0.00293	AHR,BDNF,CYP1A1,FGF21,GCKR,MLXIPL	6
Cell-To-Cell Signaling and Interaction, Nervous System Development and Function	Response of projection neurons	0.0051	BDNF	1	Cardiovascular System Development and Function	Development of vasculature	0.00295	ADRA2C,AHR,BDNF,HTR4,PKHD1,RARB,SLC4A7	7
Cell-To-Cell Signaling and Interaction	Responsiveness of brown adipocytes	0.0051	FGF21	1	Hematological Disease,Infectious Diseases	Malaria	0.00296	ADRA2C,PLCL1	2
Cell-To-Cell Signaling and Interaction	Responsiveness of fibroblast cell lines	0.0051	FGF21	1	Digestive System Development and Function,Gastrointestinal Disease	Abnormal morphology of digestive system	0.00296	AHR,BDNF,CYP1A1,PKHD1,RARB	5
Digestive System Development and Function, Organ Morphology, Organismal Development	Size of circumvallate taste bud	0.0051	BDNF	1	Free Radical Scavenging,Molecular Transport	Quantity of reactive oxygen species	0.00304	AHR,BDNF,CYP1A1	3
Cancer	Sphere formation of brain cancer cell lines	0.0051	BDNF	1	Neurological Disease,Organismal Injury and Abnormalities	Encephalopathy with late-onset epilepsy	0.00305	HTR4,SCN2A	2
Cell Morphology, Cellular Assembly and Organization, Cellular Development, Cellular Function and Maintenance, Cellular Growth and Proliferation, Embryonic Development, Nervous System Development and Function, Organismal Development, Tissue Development	Sprouting of basal dendrites	0.0051	BDNF	1	Cellular Assembly and Organization,Cellular Compromise,Nervous System Development and Function	Retraction of neurites	0.00313	BDNF,HTR4	2
Cell Morphology, Cellular Assembly and Organization, Cellular Development, Cellular Function and Maintenance, Cellular Growth and Proliferation, Nervous System Development and Function, Organismal Development, Tissue Development	Sprouting of cholinergic neurons	0.0051	BDNF	1	Cellular Development	Differentiation of carcinoma cell lines	0.00313	AHR,RARB	2
Cell Death and Survival, Nervous System Development and Function	Survival of noradrenergic neurons	0.0051	BDNF	1	Hereditary Disorder,Neurological Disease,Organismal Injury and Abnormalities	Tourette syndrome	0.00313	ADRA2C,SCN2A	2
Cell Death and Survival, Nervous System Development and Function	Survival of olfactory receptor neurons	0.0051	BDNF	1	Digestive System Development and Function	Ingestion by mice	0.00315	FGF21,FTO,HTR4	3
Cell Death and Survival, Nervous System Development and Function	Survival of serotonergic neurons	0.0051	BDNF	1	Cancer,Organismal Injury and Abnormalities,Reproductive System Disease	Genital tumor	0.00318	ABHD12B,ADH1B,ADRA2C,AHR,CYP1A1,DCDC1,FGF21,HTR4,LRRN2,mir-128,MLIP,MLLT10,NEGR1,NRXN3,PKHD1,PLCL1,RARB,SCN2A,SIX6	19
Neurological Disease, Psychological Disorders	Susceptibility to bipolar affective disorder	0.0051	BDNF	1	Cancer,Organismal Injury and Abnormalities	Extraadrenal retroperitoneal tumor	0.00321	ADRA2C,AHR,CYP1A1,DCDC1,mir-128,MLLT10,MLXIPL,NRXN3,PKHD1,PLCL1,RARB,SIX6,SLC4A7	13
Cellular Function and Maintenance, Skeletal and Muscular System Development and Function	Switching of fast-twitch muscle fibers	0.0051	PPP3R1	1	Neurological Disease,Psychological Disorders	Pervasive developmental disorder	0.00326	ADRA2C,HTR4,SCN2A	3
Cellular Function and Maintenance, Skeletal and Muscular System Development and Function	Switching of slow-twitch muscle fibers	0.0051	PPP3R1	1	Cancer,Organismal Injury and Abnormalities	Breast or pancreatic cancer	0.00328	ABHD12B,ADRA2C,AHR,CYP1A1,DCDC1,FTO,HTR4,LRRN2,mir-128,MLIP,NRXN3,PKHD1,PLCL1,RARB,SCN2A,SIX6	16
Cell-To-Cell Signaling and Interaction, Nervous System Development and Function	Synaptic fatigue of synapse	0.0051	BDNF	1	Organismal Development,Organismal Injury and Abnormalities	Abnormal morphology of abdomen	0.00331	AHR,BDNF,CYP1A1,MLLT10,PKHD1,RARB	6
Nervous System Development and Function	Taste response of chorda tympani	0.0051	BDNF	1	Dermatological Diseases and Conditions,Organismal Injury and Abnormalities	Pruritus	0.00332	ADRA2C,AHR	2
Molecular Transport	Transepithelial absorption of bicarbonate	0.0051	SLC9A3	1	Cancer,Organismal Injury and Abnormalities	Malignant genitourinary solid tumor	0.00338	ABHD12B,ADH1B,ADRA2C,AHR,CYP1A1,DCDC1,FGF21,FTO,HTR4,LRRN2,mir-128,MLIP,MLLT10,MLXIPL,NEGR1,NRXN3,PKHD1,PLCL1,RARB,SCN2A,SIX6	21
Cell-mediated Immune Response, Cellular Development, Cellular Function and Maintenance, Cellular Growth and Proliferation, Embryonic Development, Hematological System Development and Function, Hematopoiesis, Lymphoid Tissue Structure and Development, Organ Development, Organismal Development, Tissue Development	Transition of pro T4 thymocytes	0.0051	BDNF	1	Cell-To-Cell Signaling and Interaction,Nervous System Development and Function	Excitatory postsynaptic potential of neurons	0.00351	BDNF,RARB	2
Molecular Transport, RNA Trafficking	Translocation of RNA	0.0051	XPO1	1	Developmental Disorder	Growth Failure	0.00354	ADRA2C,AHR,BDNF,FTO,RARB	5
Cellular Function and Maintenance	Vesiculation of Golgi apparatus	0.0051	PRKD1	1	Lipid Metabolism,Small Molecule Biochemistry	Homeostasis of lipid	0.00357	FGF21,GCKR,MLXIPL	3
Nervous System Development and Function, Tissue Morphology	Volume of gray matter	0.0051	BDNF	1	Organismal Injury and Abnormalities	Damage of genitourinary system	0.00361	ADRA2C,AHR,FGF21	3
Cell Morphology, Cellular Assembly and Organization, Nervous System Development and Function, Tissue Morphology	Volume of nerve ending	0.0051	BDNF	1	Cellular Compromise,Neurological Disease,Organismal Injury and Abnormalities	Atrophy of projection neurons	0.00367	BDNF	1
Inflammatory Disease, Ophthalmic Disease, Organismal Injury and Abnormalities	Allergic conjunctivitis	0.00516	ADRA2C,PPP3R1	2	Cell Morphology,Cellular Function and Maintenance	Depolarization of kidney cell lines	0.00367	BDNF	1
Cardiovascular System Development and Function	Morphology of vessel	0.00518	AHR,PKHD1,PPP3R1,RARB,RASIP1	5	Nervous System Development and Function	Development of sensory nervous system	0.00367	BDNF	1
Cancer, Organismal Injury and Abnormalities	Nonhematologic malignant neoplasm	0.00519	ABHD12B,ADH1B,ADRA2C,AHR,AHSA2P,BDNF,CABCOCO1,CHCHD3,CHST10,CYP1A1,CYP2A6 (includes others),DCDC1,DCTPP1,FAM83B,FARP1,FGF21,FKBP8,FNDC4,FTO,FUT2,GCKR,HTR4,IZUMO1,KCTD13,LRRN2,MAMSTR,mir-128,MLIP,MLLT10,MLXIPL,NEGR1,NRBF2,NRXN3,NTN5,PKHD1,PLCL1,PPCDC,PPP3R1,PRKD1,RARB,RASIP1,SCAMP2,SCAMP5,SCN2A,SIX6,SLC4A7,SLC9A3,STK24,TRIM72,TSNARE1,UPB1,XPO1	52	Cell-To-Cell Signaling and Interaction,Nervous System Development and Function	Activation of cortical neurons	0.00367	BDNF	1
Connective Tissue Development and Function, Tissue Morphology	Quantity of connective tissue	0.00529	AHR,FGF21,FTO,HTR4,MLXIPL,PLCL1,RARB	7	Developmental Disorder,Hereditary Disorder,Metabolic Disease,Neurological Disease,Organismal Injury and Abnormalities	Gaucher disease type II	0.00367	BDNF	1
Digestive System Development and Function, Hepatic System Development and Function, Organ Morphology, Organismal Development	Morphology of liver	0.00538	AHR,CYP1A1,FGF21,MLXIPL,PKHD1	5	Cellular Development,Embryonic Development	Delay in initiation of differentiation of embryonic cell lines	0.00367	AHR	1
Cellular Function and Maintenance, Molecular Transport	Exocytosis by cells	0.00539	PLCL1,SCAMP2,TRIM72	3	Connective Tissue Disorders,Organismal Injury and Abnormalities,Skeletal and Muscular Disorders	Spondylolysis	0.00367	ADRA2C	1
Nervous System Development and Function, Organ Development	Growth of brain	0.00539	AHR,BDNF,NEGR1	3	Cell Death and Survival,Cellular Compromise,Neurological Disease,Tissue Morphology	Degeneration of corticospinal neurons	0.00367	BDNF	1
Cancer, Hematological Disease, Immunological Disease, Organismal Injury and Abnormalities	Childhood acute myeloid leukemia	0.0054	PPP3R1,RARB	2	Cell-To-Cell Signaling and Interaction,Cellular Growth and Proliferation,Hematological System Development and Function	Suppression of responder T cells	0.00367	AHR	1
Neurological Disease	Degeneration of peripheral nervous system	0.0054	BDNF,SLC4A7	2	Connective Tissue Development and Function,Skeletal and Muscular System Development and Function	Apposition of trabecular bone	0.00367	PLCL1	1
Connective Tissue Disorders, Dermatological Diseases and Conditions, Hematological Disease, Organismal Injury and Abnormalities	Thrombocytopenic purpura	0.0054	PPP3R1,RARB	2	Dermatological Diseases and Conditions,Organismal Injury and Abnormalities	Hypergranulosis	0.00367	AHR	1
Cancer, Hematological Disease, Organismal Injury and Abnormalities	Myeloid neoplasm	0.00541	ABHD12B,ADRA2C,FKBP8,GCKR,mir-128,MLLT10,PKHD1,PPP3R1,RARB,STK24,UPB1,XPO1	12	Small Molecule Biochemistry	Turnover of histamine	0.00367	BDNF	1
Carbohydrate Metabolism, Molecular Transport, Small Molecule Biochemistry	Concentration of D-glucose	0.00548	BDNF,FGF21,GCKR,MLXIPL,SLC4A7	5	Nervous System Development and Function,Tissue Development	Survival of white matter	0.00367	BDNF	1
Embryonic Development, Tissue Morphology	Quantity of embryonic tissue	0.0055	BDNF,BRINP1,RARB	3	Cell Morphology,Cellular Function and Maintenance	Depolarization of epithelial cell lines	0.00367	BDNF	1
Neurological Disease	Abnormality of peripheral ganglia	0.00561	BDNF,FKBP8,SLC4A7	3	Small Molecule Biochemistry	Metabolism of dacarbazine	0.00367	CYP1A1	1
Developmental Disorder	Growth Failure	0.00564	ADRA2C,AHR,BDNF,BRINP1,FTO,RARB,RASIP1	7	Developmental Disorder,Embryonic Development,Organismal Development,Tissue Morphology	Lack of nephrogenic zone	0.00367	RARB	1
Small Molecule Biochemistry	Metabolism of porphyrin	0.00565	CYP1A1,CYP2A6 (includes others)	2	Endocrine System Disorders,Hereditary Disorder,Metabolic Disease,Organismal Injury and Abnormalities	Insulin resistance type A	0.00367	BDNF	1
Endocrine System Development and Function, Lipid Metabolism, Small Molecule Biochemistry, Vitamin and Mineral Metabolism	Synthesis of estrogen	0.00565	AHR,CYP1A1	2	Behavior	Falling of mice	0.00367	RARB	1
Cell Morphology, Connective Tissue Development and Function, Tissue Morphology	Size of adipocytes	0.00572	BDNF,FGF21,FTO	3	Cellular Development,Embryonic Development,Hair and Skin Development and Function,Organ Development,Organismal Development,Tissue Development	Differentiation of squamous cell carcinoma cell lines	0.00367	RARB	1
Psychological Disorders	Alcoholism	0.00584	ADH1B,ADRA2C,SCN2A	3	Cell Morphology,Nervous System Development and Function,Neurological Disease,Organismal Injury and Abnormalities,Tissue Morphology	Hypertrophy of axons	0.00367	BDNF	1
Digestive System Development and Function, Gastrointestinal Disease, Organ Morphology, Organismal Development, Organismal Injury and Abnormalities	Abnormal morphology of colon	0.0059	AHR,BDNF	2	Dermatological Diseases and Conditions,Inflammatory Disease,Organismal Injury and Abnormalities	Severe nodular acne	0.00367	RARB	1
Cardiovascular Disease, Developmental Disorder, Organismal Injury and Abnormalities	Syndromic congenital heart disease	0.0059	ADRA2C,PRKD1	2	Hair and Skin Development and Function,Organ Morphology	Length of hair	0.00367	BDNF	1
Lipid Metabolism, Molecular Transport, Small Molecule Biochemistry	Quantity of steroid	0.00592	AHR,BDNF,CHST10,FGF21,MLXIPL,SLC9A3	6	Nervous System Development and Function,Organ Morphology,Tissue Morphology	Quantity of medium spiny neurons	0.00367	BDNF	1
Cellular Assembly and Organization	Transport of vesicles	0.00595	PRKD1,SCAMP2,SCAMP5	3	Nervous System Development and Function	Protection of cholinergic neurons	0.00367	BDNF	1
Organismal Injury and Abnormalities, Reproductive System Disease	Benign breast disease	0.00606	BRINP1,RARB,SCN2A	3	Cell-To-Cell Signaling and Interaction,Nervous System Development and Function	Long term synaptic depression of medium spiny neurons	0.00367	BDNF	1
Embryonic Development, Organismal Development, Tissue Development	Development of mesenchyme	0.00616	FGF21,RARB	2	Connective Tissue Disorders,Organismal Injury and Abnormalities,Skeletal and Muscular Disorders	Spine arthrosis	0.00367	ADRA2C	1
Skeletal and Muscular System Development and Function	Length of skeleton	0.00616	CYP1A1,HTR4	2	Cellular Assembly and Organization	Accumulation of endosomes	0.00367	BDNF	1
Cell Death and Survival, Organismal Injury and Abnormalities	Apoptosis of epithelial cell lines	0.00617	FKBP8,mir-128,PPP3R1,XPO1	4	Embryonic Development,Nervous System Development and Function,Ophthalmic Disease,Organ Development,Organ Morphology,Organismal Development,Organismal Injury and Abnormalities,Tissue Development,Visual System Development and Function	Lack of inner plexiform layer	0.00367	RARB	1
Organismal Injury and Abnormalities	Hypertrophy	0.00619	ADRA2C,AHR,BDNF,MLIP,PPP3R1,RARB	6	Cell-To-Cell Signaling and Interaction,Cellular Growth and Proliferation,Nervous System Development and Function	Excitation of interneurons	0.00367	BDNF	1
Organismal Injury and Abnormalities, Renal and Urological Disease	Injury of kidney	0.0063	ADRA2C,FGF21,SLC9A3	3	Embryonic Development,Nervous System Development and Function,Organ Development,Organismal Development,Tissue Development	Formation of ocular dominance patch	0.00367	BDNF	1
Cancer, Gastrointestinal Disease, Organismal Injury and Abnormalities	Intestinal cancer	0.00655	ABHD12B,ADRA2C,AHR,AHSA2P,BDNF,CHCHD3,CHST10,CYP2A6 (includes others),DCDC1,DCTPP1,FAM83B,FARP1,FGF21,FKBP8,FNDC4,FTO,GCKR,IZUMO1,KCTD13,LRRN2,MAMSTR,mir-128,MLLT10,MLXIPL,NEGR1,NRBF2,NRXN3,NTN5,PKHD1,PLCL1,PPP3R1,PRKD1,RARB,RASIP1,SCAMP2,SCAMP5,SCN2A,SIX6,SLC4A7,SLC9A3,TRIM72,TSNARE1,XPO1	43	Nervous System Development and Function,Tissue Morphology	Quantity of projection neurons	0.00367	BDNF	1
Cancer, Dermatological Diseases and Conditions, Organismal Injury and Abnormalities	Skin tumor	0.00667	ABHD12B,ADH1B,AHR,CABCOCO1,CHCHD3,CHST10,CYP1A1,CYP2A6 (includes others),DCDC1,FAM83B,FGF21,FKBP8,FNDC4,GCKR,HTR4,IZUMO1,LRRN2,MLIP,MLXIPL,NRXN3,NTN5,PKHD1,PLCL1,PRKD1,RARB,RASIP1,SCAMP2,SCAMP5,SCN2A,SLC9A3,STK24,TSNARE1,UPB1,XPO1	34	Psychological Disorders	Schizotypal personality disorder	0.00367	ADRA2C	1
Cardiovascular System Development and Function, Organismal Development	Patterning of blood vessel	0.00669	AHR,PPP3R1	2	Drug Metabolism,Small Molecule Biochemistry	Metabolism of flutamide	0.00367	CYP1A1	1
Connective Tissue Development and Function, Skeletal and Muscular System Development and Function, Tissue Development	Mass of trabecular bone	0.00696	AHR,FGF21	2	Cell-To-Cell Signaling and Interaction,Nervous System Development and Function	Excitatory postsynaptic potential of synapse	0.00367	BDNF	1
Cell Morphology, Connective Tissue Development and Function, Tissue Morphology	Size of white adipocytes	0.00696	FGF21,FTO	2	Organ Morphology,Organismal Development,Organismal Injury and Abnormalities,Respiratory Disease,Respiratory System Development and Function	Lack of nasolacrimal duct	0.00367	RARB	1
Gene Expression	Activation of DNA endogenous promoter	0.00697	AHR,CHCHD3,MAMSTR,MLIP,MLLT10,MLXIPL,NRBF2,PPP3R1,PRKD1,RARB,XPO1	11	Cell Cycle,Gene Expression	Binding of dioxin responsive element	0.00367	AHR	1
Cell-To-Cell Signaling and Interaction, Nervous System Development and Function	Synaptic transmission of cells	0.00703	BDNF,HTR4,KCTD13	3	Nervous System Development and Function,Neurological Disease,Organ Morphology,Organismal Development,Organismal Injury and Abnormalities	Abnormal morphology of mesencephalic tract of the trigeminal nerve	0.00367	BDNF	1
Organismal Injury and Abnormalities, Renal and Urological Disease	Failure of kidney	0.00711	ADRA2C,CYP1A1,PPP3R1,SLC9A3	4	Carbohydrate Metabolism,Lipid Metabolism,Molecular Transport,Small Molecule Biochemistry	Depletion of phosphatidylinositol 4,5-diphosphate	0.00367	BDNF	1
Organ Morphology, Organismal Injury and Abnormalities, Reproductive System Development and Function, Reproductive System Disease	Abnormal morphology of internal genitalia	0.00712	AHR,CHST10,FGF21,RARB,SLC9A3	5	Cell-To-Cell Signaling and Interaction,Nervous System Development and Function	Long term synaptic depression of dopaminergic neurons	0.00367	BDNF	1
Cellular Function and Maintenance	Cellular homeostasis	0.00716	AHR,BDNF,FGF21,GCKR,MLLT10,MLXIPL,NRBF2,PKHD1,PRKD1,RASIP1,SLC4A7,SLC9A3,XPO1	13	Cell Cycle	Delay in cell cycle progression of hepatoma cell lines	0.00367	AHR	1
Cardiovascular System Development and Function	Development of vasculature	0.00718	ADRA2C,AHR,BDNF,HTR4,PKHD1,PPP3R1,PRKD1,RARB,RASIP1,SLC4A7	10	Endocrine System Disorders,Hematological Disease,Metabolic Disease	Fasting hyperglycemia	0.00367	FGF21	1
Cell Death and Survival	Apoptosis of retinal cells	0.00724	BDNF,SLC4A7	2	Cell Morphology,Cellular Assembly and Organization,Cellular Development,Cellular Function and Maintenance,Cellular Growth and Proliferation,Nervous System Development and Function,Organismal Development,Tissue Development	Sprouting of serotonergic neurons	0.00367	BDNF	1
Behavior	Vocalization	0.00753	BRINP1,NRXN3	2	Inflammatory Response	Immunomodulation	0.00367	AHR	1
Organ Morphology, Tissue Morphology	Abnormal morphology of alveolar duct	0.00764	RARB	1	Nervous System Development and Function,Neurological Disease	Abnormal morphology of sympathetic nervous system	0.00367	BDNF	1
Digestive System Development and Function, Endocrine System Disorders, Gastrointestinal Disease, Organ Morphology, Organismal Development, Organismal Injury and Abnormalities	Abnormal morphology of dilated pancreatic duct	0.00764	PKHD1	1	Nervous System Development and Function,Tissue Development	Branching of axon bundle	0.00367	BDNF	1
Digestive System Development and Function, Gastrointestinal Disease, Organ Morphology, Organismal Development, Organismal Injury and Abnormalities	Abnormal morphology of distended cecum	0.00764	SLC9A3	1	Organismal Injury and Abnormalities,Respiratory Disease	Restrictive pulmonary disease	0.00367	ADRA2C	1
Nervous System Development and Function, Neurological Disease, Organ Morphology, Organismal Development, Organismal Injury and Abnormalities	Abnormal morphology of mesencephalic tract of the trigeminal nerve	0.00764	BDNF	1	Hematological Disease	Depression of bone marrow	0.00367	CYP1A1	1
Nervous System Development and Function, Neurological Disease	Abnormal morphology of sensory ganglion	0.00764	BDNF	1	Cell-To-Cell Signaling and Interaction,Cellular Growth and Proliferation,Nervous System Development and Function	Stimulation of serotonergic neurons	0.00367	BDNF	1
Auditory Disease, Auditory and Vestibular System Development and Function, Connective Tissue Development and Function, Connective Tissue Disorders, Organ Morphology, Organismal Development, Organismal Injury and Abnormalities, Skeletal and Muscular Disorders, Skeletal and Muscular System Development and Function, Tissue Development	Abnormal morphology of spiral ligament	0.00764	SLC4A7	1	Cell-To-Cell Signaling and Interaction,Nervous System Development and Function	Long-term potentiation of layer III	0.00367	BDNF	1
Nervous System Development and Function, Neurological Disease	Abnormal morphology of sympathetic nervous system	0.00764	BDNF	1	Cellular Development,Nervous System Development and Function,Tissue Development	Maturation of interneurons	0.00367	BDNF	1
Cellular Assembly and Organization	Accumulation of endosomes	0.00764	BDNF	1	Cell-To-Cell Signaling and Interaction,Cellular Assembly and Organization,Cellular Development,Cellular Function and Maintenance,Cellular Growth and Proliferation,Embryonic Development,Nervous System Development and Function,Organ Development,Organismal Development,Tissue Development	Synaptogenesis of hippocampal neurons	0.00367	BDNF	1
Cell-To-Cell Signaling and Interaction, Nervous System Development and Function	Activation of cortical neurons	0.00764	BDNF	1	Gastrointestinal Disease,Hepatic System Disease,Inflammatory Response,Organismal Injury and Abnormalities	Inflammation of bile duct	0.00367	AHR	1
Connective Tissue Development and Function, Skeletal and Muscular System Development and Function	Apposition of trabecular bone	0.00764	PLCL1	1	Cellular Development,Cellular Growth and Proliferation,Connective Tissue Development and Function,Skeletal and Muscular System Development and Function,Tissue Development	Expansion of osteoblasts	0.00367	HTR4	1
Cell Cycle	Arrest in cell cycle progression of neuroblastoma cell lines	0.00764	AHR	1	Nervous System Development and Function,Neurological Disease	Abnormal morphology of sensory ganglion	0.00367	BDNF	1
Cellular Compromise, Neurological Disease, Organismal Injury and Abnormalities	Atrophy of projection neurons	0.00764	BDNF	1	Digestive System Development and Function,Endocrine System Disorders,Gastrointestinal Disease,Organ Morphology,Organismal Development,Organismal Injury and Abnormalities	Abnormal morphology of dilated pancreatic duct	0.00367	PKHD1	1
Cell Cycle, Gene Expression	Binding of dioxin responsive element	0.00764	AHR	1	Small Molecule Biochemistry	Clearance of amodiaquine	0.00367	CYP1A1	1
Nervous System Development and Function, Tissue Development	Branching of axon bundle	0.00764	BDNF	1	Cell Morphology,Hematological System Development and Function	Modulation of regulatory T lymphocytes	0.00367	AHR	1
Drug Metabolism, Lipid Metabolism, Small Molecule Biochemistry, Vitamin and Mineral Metabolism	Catabolism of tretinoin	0.00764	AHR	1	Cell-To-Cell Signaling and Interaction,Cellular Assembly and Organization,Cellular Development,Cellular Function and Maintenance,Cellular Growth and Proliferation,Nervous System Development and Function,Tissue Development	Maturation of neuromuscular synapse	0.00367	BDNF	1
Small Molecule Biochemistry	Clearance of amodiaquine	0.00764	CYP1A1	1	Organ Morphology,Tissue Morphology	Abnormal morphology of alveolar duct	0.00367	RARB	1
Developmental Disorder, Skeletal and Muscular Disorders	Clubfoot	0.00764	FKBP8	1	Cell-To-Cell Signaling and Interaction,Nervous System Development and Function	Response of striatonigral neurons	0.00367	BDNF	1
Cell Death and Survival, Cellular Compromise, Neurological Disease, Tissue Morphology	Degeneration of corticospinal neurons	0.00764	BDNF	1	Drug Metabolism,Lipid Metabolism,Small Molecule Biochemistry,Vitamin and Mineral Metabolism	Catabolism of tretinoin	0.00367	AHR	1
Cellular Compromise, Connective Tissue Disorders, Organismal Injury and Abnormalities, Tissue Morphology	Degeneration of type II fibrocyte	0.00764	SLC4A7	1	Cell Morphology,Cellular Movement,Hair and Skin Development and Function,Nervous System Development and Function	Innervation of Merkel cells	0.00367	BDNF	1
Cell Cycle	Delay in cell cycle progression of hepatoma cell lines	0.00764	AHR	1	Auditory and Vestibular System Development and Function,Auditory Disease,Connective Tissue Development and Function,Connective Tissue Disorders,Organ Morphology,Organismal Development,Organismal Injury and Abnormalities,Skeletal and Muscular Disorders,Skeletal and Muscular System Development and Function,Tissue Development	Abnormal morphology of spiral ligament	0.00367	SLC4A7	1
Cellular Development, Embryonic Development	Delay in initiation of differentiation of embryonic cell lines	0.00764	AHR	1	Cellular Development,Cellular Growth and Proliferation,Nervous System Development and Function,Tissue Development	Proliferation of olfactory receptor neurons	0.00367	BDNF	1
Carbohydrate Metabolism, Lipid Metabolism, Molecular Transport, Small Molecule Biochemistry	Depletion of phosphatidylinositol 4,5-diphosphate	0.00764	BDNF	1	Auditory Disease,Organismal Injury and Abnormalities	Dysfunction of vestibular organ	0.00367	BDNF	1
Cell Morphology, Cellular Function and Maintenance	Depolarization of epithelial cell lines	0.00764	BDNF	1	Cellular Compromise,Connective Tissue Disorders,Organismal Injury and Abnormalities,Tissue Morphology	Degeneration of type II fibrocyte	0.00367	SLC4A7	1
Cell Morphology, Cellular Function and Maintenance	Depolarization of kidney cell lines	0.00764	BDNF	1	Cell-To-Cell Signaling and Interaction,Nervous System Development and Function	Response of interneurons	0.00367	BDNF	1
Hematological Disease	Depression of bone marrow	0.00764	CYP1A1	1	Nervous System Development and Function	Spinal reflex of spinal cord	0.00367	BDNF	1
Nervous System Development and Function	Development of sensory nervous system	0.00764	BDNF	1	Carbohydrate Metabolism,Cellular Function and Maintenance	Glycolysis of colorectal cancer cell lines	0.00367	MLXIPL	1
Cellular Development, Embryonic Development, Hair and Skin Development and Function, Organ Development, Organismal Development, Tissue Development	Differentiation of squamous cell carcinoma cell lines	0.00764	RARB	1	Behavior	Executive functioning	0.00367	BDNF	1
Auditory Disease, Organismal Injury and Abnormalities	Dysfunction of vestibular organ	0.00764	BDNF	1	Connective Tissue Disorders,Developmental Disorder,Gastrointestinal Disease,Organismal Development,Organismal Injury and Abnormalities,Skeletal and Muscular Disorders	Congenital malformation of face	0.00369	ADRA2C,AHR,FTO	3
Cell-To-Cell Signaling and Interaction, Nervous System Development and Function	Excitatory postsynaptic potential of synapse	0.00764	BDNF	1	Cell Morphology,Organismal Injury and Abnormalities,Tissue Morphology	Abnormal morphology of epithelial cells	0.00373	AHR,BDNF,SLC4A7	3
Behavior	Executive functioning	0.00764	BDNF	1	Cancer,Gastrointestinal Disease,Organismal Injury and Abnormalities	Pancreatobiliary tumor	0.00387	ADH1B,ADRA2C,AHR,CYP1A1,DCDC1,mir-128,NRXN3,PKHD1,PLCL1,SCN2A,SIX6,SLC4A7	12
Cellular Development, Cellular Growth and Proliferation, Connective Tissue Development and Function, Skeletal and Muscular System Development and Function, Tissue Development	Expansion of osteoblasts	0.00764	HTR4	1	Cell-To-Cell Signaling and Interaction,Nervous System Development and Function	Adhesion of neuronal cells	0.0039	BDNF,NRXN3	2
Molecular Transport, RNA Trafficking	Export of U1 snRNA	0.00764	XPO1	1	Neurological Disease	Dystonia	0.0039	ADRA2C,SCN2A	2
Behavior	Falling of mice	0.00764	RARB	1	Cancer,Organismal Injury and Abnormalities,Reproductive System Disease	Breast or ovarian cancer	0.00394	ABHD12B,ADRA2C,CYP1A1,FTO,HTR4,LRRN2,mir-128,MLIP,NRXN3,PKHD1,RARB,SCN2A,SIX6	13
Embryonic Development, Nervous System Development and Function, Organ Development, Organismal Development, Tissue Development	Formation of ocular dominance patch	0.00764	BDNF	1	Skeletal and Muscular System Development and Function	Morphology of axial skeleton	0.00402	CYP1A1,PLCL1,RARB	3
Developmental Disorder, Hereditary Disorder, Metabolic Disease, Neurological Disease, Organismal Injury and Abnormalities	Gaucher disease type II	0.00764	BDNF	1	Cancer,Cellular Development,Cellular Growth and Proliferation,Organismal Injury and Abnormalities,Reproductive System Disease,Tumor Morphology	Proliferation of mammary tumor cells	0.00421	RARB,SLC4A7	2
Carbohydrate Metabolism, Cellular Function and Maintenance	Glycolysis of colorectal cancer cell lines	0.00764	MLXIPL	1	Cancer,Organismal Injury and Abnormalities	Malignant neoplasm of retroperitoneum	0.00423	ADRA2C,AHR,CYP1A1,DCDC1,mir-128,MLLT10,MLXIPL,NRXN3,PKHD1,PLCL1,RARB,SIX6	12
Cellular Assembly and Organization, Cellular Development, Cellular Growth and Proliferation, Nervous System Development and Function, Tissue Development	Growth of dendritic trees	0.00764	BDNF	1	Cancer,Organismal Injury and Abnormalities	Genitourinary carcinoma	0.00428	ABHD12B,ADH1B,ADRA2C,AHR,CYP1A1,DCDC1,FGF21,HTR4,LRRN2,mir-128,MLIP,MLLT10,MLXIPL,NEGR1,NRXN3,PKHD1,PLCL1,SCN2A,SIX6	19
Dermatological Diseases and Conditions, Organismal Injury and Abnormalities	Hypergranulosis	0.00764	AHR	1	Cancer,Organismal Injury and Abnormalities	Liquid tumor	0.00428	ABHD12B,ADRA2C,CYP1A1,GCKR,mir-128,MLLT10,NRXN3,PKHD1,RARB,SCN2A	10
Cell Morphology, Nervous System Development and Function, Neurological Disease, Organismal Injury and Abnormalities, Tissue Morphology	Hypertrophy of axons	0.00764	BDNF	1	Energy Production,Lipid Metabolism,Small Molecule Biochemistry	Oxidation of lipid	0.00437	CYP1A1,FGF21,MLXIPL	3
Inflammatory Response	Immunomodulation	0.00764	AHR	1	Developmental Disorder	Aplasia	0.00437	AHR,HTR4,RARB	3
Gastrointestinal Disease, Hepatic System Disease, Inflammatory Response, Organismal Injury and Abnormalities	Inflammation of bile duct	0.00764	AHR	1	Auditory and Vestibular System Development and Function,Auditory Disease,Organ Morphology,Organismal Development,Organismal Injury and Abnormalities	Abnormal morphology of cochlea	0.00442	BDNF,SLC4A7	2
Cell Morphology, Cellular Movement, Hair and Skin Development and Function, Nervous System Development and Function	Innervation of Merkel cells	0.00764	BDNF	1	Lipid Metabolism,Molecular Transport,Small Molecule Biochemistry	Uptake of fatty acid	0.00452	AHR,BDNF	2
Endocrine System Disorders, Hereditary Disorder, Metabolic Disease, Organismal Injury and Abnormalities	Insulin resistance type A	0.00764	BDNF	1	Hematological System Development and Function,Immunological Disease,Lymphoid Tissue Structure and Development,Organ Morphology,Organismal Injury and Abnormalities,Tissue Morphology	Abnormal morphology of lymphoid organ	0.00453	AHR,CYP1A1,MLLT10,RARB	4
Embryonic Development, Nervous System Development and Function, Ophthalmic Disease, Organ Development, Organ Morphology, Organismal Development, Organismal Injury and Abnormalities, Tissue Development, Visual System Development and Function	Lack of inner plexiform layer	0.00764	RARB	1	Carbohydrate Metabolism,Cellular Function and Maintenance,Small Molecule Biochemistry	Homeostasis of D-glucose	0.0046	FGF21,GCKR,MLXIPL	3
Organ Morphology, Organismal Development, Organismal Injury and Abnormalities, Respiratory Disease, Respiratory System Development and Function	Lack of nasolacrimal duct	0.00764	RARB	1	Organismal Development	Size of head	0.00465	BDNF,FTO,SIX6	3
Developmental Disorder, Embryonic Development, Organismal Development, Tissue Morphology	Lack of nephrogenic zone	0.00764	RARB	1	Reproductive System Development and Function	Ovulation	0.00474	AHR,SIX6	2
Hair and Skin Development and Function, Organ Morphology	Length of hair	0.00764	BDNF	1	Connective Tissue Disorders,Inflammatory Disease,Inflammatory Response,Organismal Injury and Abnormalities,Skeletal and Muscular Disorders	Osteoarthritis	0.00484	ADRA2C,BDNF,SCN2A	3
Cell-To-Cell Signaling and Interaction, Nervous System Development and Function	Long term depression of dopaminergic neurons	0.00764	BDNF	1	Neurological Disease,Psychological Disorders	Dyssomnia	0.00485	ADRA2C,BDNF	2
Cell-To-Cell Signaling and Interaction, Nervous System Development and Function	Long term depression of medium spiny neurons	0.00764	BDNF	1	Cell-To-Cell Signaling and Interaction,Cellular Assembly and Organization	Cell-cell contact	0.00487	BDNF,NEGR1,NRXN3,PKHD1,RARB	5
Cell-To-Cell Signaling and Interaction, Nervous System Development and Function	Long-term potentiation of layer III	0.00764	BDNF	1	Cell Death and Survival	Killing of sympathetic neuron	0.00489	BDNF	1
Cellular Development, Nervous System Development and Function, Tissue Development	Maturation of interneurons	0.00764	BDNF	1	Cell-mediated Immune Response,Cellular Development,Cellular Function and Maintenance,Cellular Growth and Proliferation,Embryonic Development,Hematological System Development and Function,Hematopoiesis,Lymphoid Tissue Structure and Development,Organ Development,Organismal Development,Tissue Development	Transition of pro T4 thymocytes	0.00489	BDNF	1
Cell-To-Cell Signaling and Interaction, Cellular Assembly and Organization, Cellular Development, Cellular Function and Maintenance, Cellular Growth and Proliferation, Nervous System Development and Function, Tissue Development	Maturation of neuromuscular synapse	0.00764	BDNF	1	Cell Morphology,Cellular Assembly and Organization,Cellular Development,Cellular Function and Maintenance,Cellular Growth and Proliferation,Nervous System Development and Function,Organismal Development,Tissue Development	Sprouting of sensory neurons	0.00489	BDNF	1
Small Molecule Biochemistry	Metabolism of dacarbazine	0.00764	CYP1A1	1	Nervous System Development and Function,Tissue Morphology	Quantity of enteric neurons	0.00489	HTR4	1
Drug Metabolism, Small Molecule Biochemistry	Metabolism of flutamide	0.00764	CYP1A1	1	Cellular Assembly and Organization,Cellular Development,Cellular Growth and Proliferation,Nervous System Development and Function,Tissue Development	Growth of dendritic trees	0.00489	BDNF	1
Small Molecule Biochemistry	Metabolism of indole	0.00764	CYP2A6 (includes others)	1	Auditory and Vestibular System Development and Function,Auditory Disease,Cell Morphology,Organ Morphology,Organismal Development,Organismal Injury and Abnormalities,Tissue Morphology	Abnormal morphology of Claudius cells	0.00489	SLC4A7	1
Cell Morphology, Hematological System Development and Function	Modulation of regulatory T lymphocytes	0.00764	AHR	1	Digestive System Development and Function,Skeletal and Muscular System Development and Function	Contraction of longitudinal muscle layer	0.00489	BDNF	1
Dermatological Diseases and Conditions, Inflammatory Disease, Organismal Injury and Abnormalities	Nodular acne	0.00764	RARB	1	Cellular Compromise,Neurological Disease,Organismal Injury and Abnormalities	Atrophy of dendrites	0.00489	BDNF	1
Cellular Development, Cellular Growth and Proliferation, Nervous System Development and Function, Tissue Development	Proliferation of olfactory receptor neurons	0.00764	BDNF	1	Cellular Development,Cellular Growth and Proliferation,Nervous System Development and Function,Organ Development,Tissue Development	Proliferation of hypothalamic neurons	0.00489	NEGR1	1
Nervous System Development and Function	Protection of cholinergic neurons	0.00764	BDNF	1	Behavior	Limb clasping of hindlimb	0.00489	BDNF	1
Nervous System Development and Function, Tissue Morphology	Quantity of enteric neurons	0.00764	HTR4	1	Cell Morphology,Cellular Movement,Nervous System Development and Function	Innervation of sensory axons	0.00489	BDNF	1
Nervous System Development and Function, Organ Morphology, Tissue Morphology	Quantity of medium spiny neurons	0.00764	BDNF	1	Cell Signaling,Molecular Transport,Vitamin and Mineral Metabolism	Cycling of Ca2+	0.00489	BDNF	1
Nervous System Development and Function, Tissue Morphology	Quantity of projection neurons	0.00764	BDNF	1	Carbohydrate Metabolism,Small Molecule Biochemistry	Phosphorylation of D-glucose	0.00489	GCKR	1
Cell-To-Cell Signaling and Interaction, Nervous System Development and Function	Response of interneurons	0.00764	BDNF	1	Cell Death and Survival	Apoptosis of corticospinal neurons	0.00489	BDNF	1
Cell-To-Cell Signaling and Interaction, Nervous System Development and Function	Response of striatonigral neurons	0.00764	BDNF	1	Nervous System Development and Function,Tissue Development	Growth of fiber tract	0.00489	BDNF	1
Organismal Injury and Abnormalities, Respiratory Disease	Restrictive pulmonary disease	0.00764	ADRA2C	1	Lipid Metabolism,Small Molecule Biochemistry	Lipogenesis of fat	0.00489	MLXIPL	1
Psychological Disorders	Schizotypal personality disorder	0.00764	ADRA2C	1	Cell Morphology,Cellular Function and Maintenance,Embryonic Development	Depolarization of embryonic cell lines	0.00489	BDNF	1
Nervous System Development and Function	Spinal reflex of spinal cord	0.00764	BDNF	1	Embryonic Development,Nervous System Development and Function,Organ Development,Organismal Development,Tissue Development	Formation of molecular layer of cerebellum	0.00489	BDNF	1
Connective Tissue Disorders, Organismal Injury and Abnormalities, Skeletal and Muscular Disorders	Spondylolisthesis	0.00764	ADRA2C	1	Connective Tissue Development and Function,Connective Tissue Disorders,Organ Morphology,Organismal Development,Organismal Injury and Abnormalities,Respiratory Disease,Respiratory System Development and Function,Skeletal and Muscular Disorders,Skeletal and Muscular System Development and Function,Tissue Morphology	Abnormal morphology of arytenoid cartilage	0.00489	RARB	1
Connective Tissue Disorders, Organismal Injury and Abnormalities, Skeletal and Muscular Disorders	Spondylolysis	0.00764	ADRA2C	1	Organismal Injury and Abnormalities	Ethylene glycol poisoning	0.00489	ADH1B	1
Cell Morphology, Cellular Assembly and Organization, Cellular Development, Cellular Function and Maintenance, Cellular Growth and Proliferation, Nervous System Development and Function, Organismal Development, Tissue Development	Sprouting of serotonergic neurons	0.00764	BDNF	1	Organismal Injury and Abnormalities	Methanol poisoning	0.00489	ADH1B	1
Cell-To-Cell Signaling and Interaction, Cellular Growth and Proliferation, Nervous System Development and Function	Stimulation of serotonergic neurons	0.00764	BDNF	1	Cell Cycle	Arrest in cell cycle progression of neuroblastoma cell lines	0.00489	AHR	1
Cell-To-Cell Signaling and Interaction, Cellular Growth and Proliferation, Hematological System Development and Function	Suppression of responder T cells	0.00764	AHR	1	Cancer,Dermatological Diseases and Conditions,Organismal Injury and Abnormalities	Hyperplasia of hair follicle	0.00489	AHR	1
Nervous System Development and Function, Tissue Development	Survival of white matter	0.00764	BDNF	1	Cell-To-Cell Signaling and Interaction,Nervous System Development and Function	Long-term potentiation of excitatory synapses	0.00489	BDNF	1
Cell-To-Cell Signaling and Interaction, Cellular Assembly and Organization, Cellular Development, Cellular Function and Maintenance, Cellular Growth and Proliferation, Embryonic Development, Nervous System Development and Function, Organ Development, Organismal Development, Tissue Development	Synaptogenesis of hippocampal neurons	0.00764	BDNF	1	Behavior	Ingestion of sucrose	0.00489	BDNF	1
Cell-mediated Immune Response, Cellular Development, Cellular Function and Maintenance, Cellular Growth and Proliferation, Embryonic Development, Hematological System Development and Function, Hematopoiesis, Lymphoid Tissue Structure and Development, Organ Development, Organismal Development, Tissue Development	Transition of pro-T3 thymocytes	0.00764	BDNF	1	Cell Death and Survival	Cell death of interneurons	0.00489	BDNF	1
Small Molecule Biochemistry	Turnover of histamine	0.00764	BDNF	1	Connective Tissue Development and Function,Skeletal and Muscular System Development and Function,Tissue Morphology	Quantity of osteoclast precursor cells	0.00489	AHR	1
Cancer, Organismal Injury and Abnormalities	Lymphoreticular neoplasm	0.00779	ABHD12B,ADRA2C,AHR,CYP1A1,CYP2A6 (includes others),FKBP8,GCKR,mir-128,MLLT10,MLXIPL,NRXN3,PKHD1,PPP3R1,RARB,SCN2A,STK24,UPB1,XPO1	18	Cellular Growth and Proliferation	Accumulation of hepatoma cell lines	0.00489	AHR	1
Neurological Disease	Abnormality of vestibulocochlear nerve	0.00781	BDNF,SLC4A7	2	Cancer,Cell-To-Cell Signaling and Interaction,Cellular Growth and Proliferation,Organismal Injury and Abnormalities,Tumor Morphology	Stimulation of mammary tumor cells	0.00489	BDNF	1
Psychological Disorders	Alcohol abuse	0.00781	ADRA2C,SCN2A	2	Cardiovascular System Development and Function,Digestive System Development and Function,Gastrointestinal Disease,Hepatic System Disease,Organismal Injury and Abnormalities	Bile duct proliferation	0.00489	PKHD1	1
Organ Morphology, Organismal Development, Reproductive System Development and Function	Mass of reproductive tract	0.00781	AHR,CHST10	2	Nervous System Development and Function,Neurological Disease	Abnormal morphology of sensory nervous system	0.00489	BDNF	1
Cardiovascular System Development and Function, Organismal Development	Vasculogenesis	0.00788	ADRA2C,AHR,BDNF,HTR4,PPP3R1,PRKD1,RARB,RASIP1	8	Cell-To-Cell Signaling and Interaction,Cellular Movement,Nervous System Development and Function	Recruitment of medium spiny neurons	0.00489	BDNF	1
Neurological Disease, Organismal Injury and Abnormalities	Migraines	0.00795	ADRA2C,HTR4,SCN2A	3	Lipid Metabolism,Small Molecule Biochemistry	Metabolism of 20-hydroxyeicosatetraenoic acid	0.00489	CYP1A1	1
Psychological Disorders	Anxiety Disorders	0.00808	ADRA2C,BDNF,SCN2A	3	Nervous System Development and Function	Survival of dorsal root ganglion	0.00489	BDNF	1
Connective Tissue Disorders, Inflammatory Disease, Organismal Injury and Abnormalities, Skeletal and Muscular Disorders	Rheumatic disease of joint	0.00808	ADRA2C,BDNF,SCN2A	3	Cell Death and Survival,Cellular Compromise,Neurological Disease,Tissue Morphology	Neurodegeneration of projection neurons	0.00489	BDNF	1
Endocrine System Development and Function, Molecular Transport, Small Molecule Biochemistry	Abnormal quantity of hormone	0.00811	AHR,FTO	2	Cell Morphology,Cellular Assembly and Organization,Nervous System Development and Function,Tissue Morphology	Area of perikaryon	0.00489	BDNF	1
Connective Tissue Development and Function, Organ Morphology, Organismal Development, Reproductive System Development and Function, Tissue Morphology	Mass of epigonadal fat pad	0.00811	FGF21,FTO	2	Neurological Disease,Skeletal and Muscular Disorders	Muscle spasticity of upper limb	0.00489	ADRA2C	1
Cellular Development	Differentiation of neuroblastoma cell lines	0.00841	AHR,BDNF	2	Small Molecule Biochemistry	Metabolism of rosiglitazone	0.00489	CYP1A1	1
Cancer, Hematological Disease, Hereditary Disorder, Organismal Injury and Abnormalities	Myelodysplastic syndrome with 5q- syndrome	0.00841	mir-128,PPP3R1	2	Gastrointestinal Disease	Chronic idiopathic constipation	0.00489	HTR4	1
Cell-To-Cell Signaling and Interaction, Small Molecule Biochemistry	Synthesis of neurotransmitter	0.00841	AHR,BDNF	2	Cardiovascular Disease,Developmental Disorder,Organismal Injury and Abnormalities	Acyanotic congenital heart disease	0.00489	ADRA2C	1
Embryonic Development, Organismal Development, Skeletal and Muscular System Development and Function	Limb development	0.00861	FGF21,HTR4,RARB,TMEM107	4	Molecular Transport	Extrusion of acid	0.00489	SLC4A7	1
Cell Cycle, Cellular Assembly and Organization, Cellular Function and Maintenance, DNA Replication, Recombination, and Repair	Duplication of centrosome	0.00871	PKHD1,XPO1	2	Small Molecule Biochemistry	Metabolism of amodiaquine	0.00489	CYP1A1	1
Gastrointestinal Disease, Organismal Injury and Abnormalities	Megacolon	0.00871	BDNF,SLC9A3	2	Cellular Function and Maintenance	Mitochondrial respiration of colorectal cancer cell lines	0.00489	MLXIPL	1
Cancer, Hematological Disease, Organismal Injury and Abnormalities	Malignant myeloid neoplasm	0.00874	ABHD12B,ADRA2C,FKBP8,GCKR,mir-128,MLLT10,PKHD1,PPP3R1,RARB,UPB1,XPO1	11	Cell-To-Cell Signaling and Interaction,Nervous System Development and Function	Priming of dorsal root ganglion cells	0.00489	BDNF	1
Protein Synthesis	Quantity of protein in blood	0.00882	BDNF,CYP1A1,FGF21,FTO,GCKR,MLXIPL	6	Cell Signaling,Molecular Transport,Small Molecule Biochemistry	Accumulation of nitric oxide	0.00489	BDNF	1
Cancer, Gastrointestinal Disease, Organismal Injury and Abnormalities	Large intestine adenocarcinoma	0.00882	ADRA2C,AHR,AHSA2P,BDNF,CHCHD3,CHST10,CYP2A6 (includes others),DCDC1,DCTPP1,FAM83B,FARP1,FGF21,FKBP8,FNDC4,FTO,GCKR,IZUMO1,KCTD13,LRRN2,MAMSTR,MLLT10,MLXIPL,NEGR1,NRBF2,NRXN3,NTN5,PKHD1,PLCL1,PPP3R1,PRKD1,RARB,RASIP1,SCAMP2,SCAMP5,SCN2A,SIX6,SLC4A7,SLC9A3,TRIM72,TSNARE1,XPO1	41	Cell Death and Survival,Cell Morphology,Nervous System Development and Function,Neurological Disease,Organ Morphology,Organismal Development,Tissue Morphology	Loss of mesencephalic neurons	0.00489	BDNF	1
Nervous System Development and Function	Sensory system development	0.00888	BDNF,FKBP8,FTO,RARB,SIX6,SLC4A7	6	Behavior	Self-administration of ethanol	0.00489	BDNF	1
Connective Tissue Development and Function, Connective Tissue Disorders, Organ Morphology, Organismal Development, Organismal Injury and Abnormalities, Skeletal and Muscular Disorders, Skeletal and Muscular System Development and Function, Tissue Development	Abnormal morphology of temporal bone	0.00902	RARB,SLC4A7	2	Cardiovascular System Development and Function,Digestive System Development and Function,Gastrointestinal Disease,Hepatic System Development and Function,Hepatic System Disease,Organismal Development,Organismal Injury and Abnormalities,Tissue Morphology	Pathological dilation of bile duct	0.00489	PKHD1	1
Organismal Injury and Abnormalities, Renal and Urological Disease	Acute kidney injury	0.00902	ADRA2C,SLC9A3	2	Cardiovascular Disease,Organismal Injury and Abnormalities	Angiogenesis of infarct	0.00489	BDNF	1
Cancer, Gastrointestinal Disease, Organismal Injury and Abnormalities	Hyperplasia of gastrointestinal tract	0.00902	AHR,RARB	2	Nervous System Development and Function	Regeneration of peripheral nerve	0.00489	BDNF	1
Lipid Metabolism, Molecular Transport, Small Molecule Biochemistry	Quantity of steroid hormone	0.00908	AHR,FGF21,SLC9A3	3	Cellular Development,Connective Tissue Development and Function	Delay in differentiation of fibroblast cell lines	0.00489	AHR	1
Cardiovascular Disease, Cardiovascular System Development and Function, Organismal Injury and Abnormalities, Tissue Morphology	Abnormal morphology of blood vessel	0.00908	AHR,PPP3R1,RARB,RASIP1	4	Endocrine System Development and Function,Small Molecule Biochemistry	Hydroxylation of melatonin	0.00489	CYP1A1	1
Cardiovascular Disease, Cardiovascular System Development and Function, Organismal Injury and Abnormalities, Tissue Morphology	Abnormal morphology of artery	0.00922	AHR,RARB,RASIP1	3	Embryonic Development,Organ Development,Organismal Development,Renal and Urological System Development and Function,Tissue Development	Development of metanephric bud	0.00496	BDNF,RARB	2
Cancer, Dermatological Diseases and Conditions, Organismal Injury and Abnormalities	Cutaneous melanoma	0.00932	ABHD12B,ADH1B,CABCOCO1,CHCHD3,CHST10,CYP1A1,CYP2A6 (includes others),DCDC1,FAM83B,FGF21,FKBP8,FNDC4,GCKR,HTR4,IZUMO1,LRRN2,MLIP,MLXIPL,NRXN3,NTN5,PKHD1,PLCL1,PRKD1,RASIP1,SCAMP2,SCAMP5,SCN2A,SLC9A3,STK24,TSNARE1,UPB1,XPO1	32	Digestive System Development and Function,Organ Morphology,Organismal Development	Morphology of stomach	0.00496	AHR,RARB	2
Small Molecule Biochemistry	Metabolism of phenol derivative	0.00933	CYP1A1,CYP2A6 (includes others)	2	Cell-To-Cell Signaling and Interaction,Nervous System Development and Function	Neurotransmission	0.00497	BDNF,HTR4,RARB,SCN2A	4
Lipid Metabolism, Molecular Transport, Small Molecule Biochemistry	Secretion of steroid hormone	0.00933	BDNF,PRKD1	2	Neurological Disease,Psychological Disorders	Major depression	0.00513	ADRA2C,BDNF,SCN2A	3
Cardiovascular Disease, Developmental Disorder, Hereditary Disorder, Organismal Injury and Abnormalities	Familial congenital heart disease	0.00937	ADRA2C,PRKD1,RARB	3	Nutritional Disease	Severe obesity	0.00519	BDNF,FTO	2
Organismal Injury and Abnormalities, Tissue Morphology	Hypertrophy of tissue	0.00938	AHR,BDNF,MLIP,PPP3R1	4	Cancer,Organismal Injury and Abnormalities,Reproductive System Disease	Breast cancer	0.00519	ADRA2C,CYP1A1,FTO,LRRN2,mir-128,MLIP,PKHD1,RARB,SCN2A,SIX6	10
Cancer, Organismal Injury and Abnormalities, Reproductive System Disease, Skeletal and Muscular Disorders	Uterine leiomyoma	0.00938	ADH1B,ADRA2C,AHR,NEGR1	4	Organismal Injury and Abnormalities,Tissue Morphology	Abnormal morphology of epithelial tissue	0.00528	AHR,BDNF,RARB,SLC4A7	4
Reproductive System Development and Function	Morphology of reproductive system	0.00959	AHR,CHST10,FGF21,FTO,MLXIPL,RARB,SLC9A3	7	Developmental Disorder,Hereditary Disorder,Neurological Disease,Organismal Injury and Abnormalities	Ohtahara syndrome	0.0053	HTR4,SCN2A	2
Neurological Disease, Psychological Disorders	Obsessive-compulsive disorder	0.00965	ADRA2C,BDNF	2	Nervous System Development and Function	Analgesia	0.0053	ADRA2C,BDNF	2
Organ Morphology, Reproductive System Development and Function	Morphology of genital organ	0.00985	AHR,CHST10,FGF21,MLXIPL,RARB,SLC9A3	6	Connective Tissue Disorders,Developmental Disorder,Organismal Injury and Abnormalities,Skeletal and Muscular Disorders	Dysplasia of bone	0.0053	ADRA2C,HTR4	2
The table shows various diseases and functions and the significance of pathways comprising genes known to be involved in those diseases and functions. *Behaviour was predefined by the IPA as “behavioural response to stimuli” and the definition includes molecular mechanisms and processes that affect, decrease or increase adult behavioural response to stimuli, including initiation of behaviour or d…
