# Supplementary material for: GWAS for urinary sodium and potassium excretion highlights pathways shared with cardiovascular traits
Source: Nat Commun. 2019 Aug 13;10:3653. doi: 10.1038/s41467-019-11451-y (PMC6692500; doi:10.1038/s41467-019-11451-y)
Supplement: Supplementary file 22 — Supplementary Dataset 22 [file 41467_2019_11451_MOESM22_ESM.xlsx]

## Sheet: Supplementary Data 22
	Supplementary Data 22: Outlier test and effect estimates of urinary sodium loci used for Mendelian randomization analysis.
SBP	SNP	A1	Beta_exposure	SE_exposure	Beta_outcome	SE_outcome	Outlier.Test.RSSobs	Outlier.Test.Pvalue	Significant
	rs10136360	G	-0.00978247	0.00209798	-0.10189	0.0649261	0.00726615	1	NA
	rs1036336	T	0.00391293	0.00174305	-0.000789132	0.0532223	6.44906e-05	1	NA
	rs10457480	C	-0.011971	0.00188802	0.276111	0.0583789	0.0944803	<0.017	*
	rs11584700	A	0.00851946	0.00214523	-0.0415591	0.0652097	0.00335971	1	NA
	rs11642015	C	-0.0117333	0.00177702	-0.270159	0.054249	0.0661026	<0.017	*
	rs11646118	T	0.0132983	0.00308994	0.202301	0.0948001	0.0325164	1	NA
	rs117287096	G	-0.0339561	0.00587996	0.0403909	0.180251	0.0111585	1	NA
	rs1229984	T	0.0293133	0.00566067	-1.07095	0.155796	1.33187	<0.017	*
	rs12581220	C	0.0108906	0.00188139	-0.104128	0.0577606	0.0162367	1	NA
	rs1260326	T	0.0133212	0.00177884	0.112204	0.0541526	0.00839142	1	NA
	rs13163314	C	0.0104254	0.00206759	0.23124	0.0630742	0.0467582	0.017	*
	rs141086701	G	0.0485642	0.010454	0.514444	0.31226	0.186971	1	NA
	rs1437971	A	0.0105181	0.00183983	0.043414	0.0565762	0.000607047	1	NA
	rs1513481	C	-0.00812225	0.00188569	-0.0184433	0.0577537	1.24305e-05	1	NA
	rs1516187	T	-0.0127046	0.00258873	0.0221119	0.0786138	0.00215168	1	NA
	rs1562308	A	-0.0061764	0.00177344	0.00206142	0.0544218	0.000184076	1	NA
	rs16850592	T	0.00834916	0.00204031	0.0616865	0.0622188	0.00219986	1	NA
	rs17123039	T	0.00706205	0.00176399	0.0331215	0.0542796	0.000414257	1	NA
	rs17635778	C	0.00968992	0.0023137	0.167728	0.0704679	0.0230791	1	NA
	rs1957111	C	-0.0109742	0.00389037	-0.0470192	0.121085	0.000726529	1	NA
	rs1996928	G	0.00932168	0.00200092	0.0473636	0.061319	0.000941954	1	NA
	rs2021807	T	0.00991733	0.00186462	-0.103704	0.0573053	0.0155346	1	NA
	rs2393831	A	0.00882293	0.00209453	-0.128544	0.0640719	0.0215458	1	NA
	rs2422137	C	0.00660682	0.00174923	0.112464	0.0534111	0.0102808	1	NA
	rs2472297	C	0.0159484	0.00195632	0.0770543	0.0609597	0.00251084	1	NA
	rs2504671	C	0.0119628	0.00205758	0.157976	0.0629427	0.0194662	1	NA
	rs2761589	C	-0.00927394	0.00179892	0.140315	0.0554035	0.0257955	0.204	NA
	rs2945091	G	0.00850681	0.00174815	-0.0124893	0.0537189	0.000822397	1	NA
	rs2968426	G	0.00870931	0.00199781	0.116296	0.0616412	0.0103414	1	NA
	rs33951980	C	0.0134732	0.00257259	0.0797821	0.079658	0.00314692	1	NA
	rs34452566	G	-0.0109889	0.00216644	-0.0478482	0.0669812	0.000791738	1	NA
	rs34783010	G	0.0114009	0.00220655	-0.123802	0.0670371	0.0218617	1	NA
	rs40465	T	-0.00937584	0.00185473	0.147678	0.0566183	0.0283052	0.187	NA
	rs4410790	T	0.0126236	0.0018047	-0.142285	0.0551768	0.0295696	0.068	*
	rs4442732	A	-0.00860072	0.00179792	0.110046	0.0550566	0.0164152	1	NA
	rs4788415	T	-0.0140159	0.00301521	-0.195582	0.0921716	0.0297897	1	NA
	rs55807911	T	-0.010848	0.0022936	-0.212555	0.0699046	0.0383868	0.289	NA
	rs5760425	T	0.0083965	0.00178378	-0.0551082	0.05464	0.00515356	1	NA
	rs643428	C	0.00752158	0.00178845	-0.0153111	0.0546979	0.000874371	1	NA
	rs7072776	A	0.0121008	0.00195059	0.248665	0.0596253	0.0543859	<0.017	*
	rs7140993	G	0.0100645	0.00199031	0.079763	0.0607421	0.00389845	1	NA
	rs72634682	G	-0.0113426	0.0025024	0.151333	0.078111	0.0305763	1	NA
	rs7334078	T	0.0104682	0.00193658	0.053877	0.059228	0.00125131	1	NA
	rs7442885	C	0.00964743	0.00212906	0.290048	0.0649898	0.0765141	<0.017	*
	rs7619139	T	-0.00774303	0.00176905	0.0241374	0.0543187	0.00151865	1	NA
	rs784257	T	-0.00917972	0.00225514	0.167537	0.0683435	0.0349144	0.323	NA
	rs7924036	G	0.00947624	0.00173951	0.16891	0.0532908	0.0240055	0.136	NA
	rs816366	C	0.0094214	0.00187207	0.210409	0.057726	0.0387229	<0.017	*
	rs838133	A	-0.0131796	0.00179511	0.177678	0.0553642	0.0442933	0.034	*
	rs9387963	G	-0.00772329	0.00175426	-0.243599	0.053674	0.0541959	<0.017	*
	rs9537160	C	0.00758467	0.00194508	-0.133169	0.0597397	0.0221577	0.918	NA
DBP	SNP	A1	Beta_exposure	SE_exposure	Beta_outcome	SE_outcome	Outlier.Test.RSSobs	Outlier.Test.Pvalue	Significant
	rs10136360	G	-0.00978247	0.00209798	-0.103229	0.0377675	0.00768894	1	NA
	rs1036336	T	0.00391293	0.00174305	0.026115	0.0309475	0.000376593	1	NA
	rs10457480	C	-0.011971	0.00188802	0.228229	0.0339432	0.0658812	<0.017	*
	rs11584700	A	0.00851946	0.00214523	-0.0422763	0.0378859	0.00333502	1	NA
	rs11642015	C	-0.0117333	0.00177702	-0.147934	0.0315484	0.0174214	<0.017	*
	rs11646118	T	0.0132983	0.00308994	0.154723	0.0551309	0.0178329	0.884	NA
	rs117287096	G	-0.0339561	0.00587996	0.0044481	0.104816	0.00421967	1	NA
	rs1229984	T	0.0293133	0.00566067	-0.237019	0.0906171	0.0871914	0.085	*
	rs12581220	C	0.0108906	0.00188139	-0.0288338	0.0335884	0.00239652	1	NA
	rs1260326	T	0.0133212	0.00177884	0.00791791	0.0314884	0.000251553	1	NA
	rs13163314	C	0.0104254	0.00206759	0.13602	0.0366934	0.0144684	0.034	*
	rs141086701	G	0.0485642	0.010454	0.390635	0.181645	0.0972253	1	NA
	rs1437971	A	0.0105181	0.00183983	-0.0102864	0.0328976	0.000855056	1	NA
	rs1513481	C	-0.00812225	0.00188569	-0.0103733	0.0335794	1.41451e-05	1	NA
	rs1516187	T	-0.0127046	0.00258873	0.0403531	0.0457118	0.00404005	1	NA
	rs1562308	A	-0.0061764	0.00177344	0.0849914	0.0316449	0.00932877	0.085	*
	rs16850592	T	0.00834916	0.00204031	0.0980602	0.0361786	0.00716931	1	NA
	rs17123039	T	0.00706205	0.00176399	0.0286881	0.0315745	0.00027707	1	NA
	rs17635778	C	0.00968992	0.0023137	0.0793281	0.0409907	0.0040173	1	NA
	rs1957111	C	-0.0109742	0.00389037	-0.0320288	0.0704354	0.000171078	1	NA
	rs1996928	G	0.00932168	0.00200092	0.0707697	0.0356467	0.00308287	1	NA
	rs2021807	T	0.00991733	0.00186462	-0.1381	0.033342	0.0251778	<0.017	*
	rs2393831	A	0.00882293	0.00209453	-0.0727653	0.0372602	0.00796861	1	NA
	rs2422137	C	0.00660682	0.00174923	0.0261364	0.031031	0.000220358	1	NA
	rs2472297	C	0.0159484	0.00195632	0.0621842	0.0354369	0.00131815	1	NA
	rs2504671	C	0.0119628	0.00205758	0.0982713	0.0365966	0.006333	1	NA
	rs2761589	C	-0.00927394	0.00179892	0.125939	0.0322354	0.0209978	<0.017	*
	rs2945091	G	0.00850681	0.00174815	-0.00604409	0.0312554	0.000448162	1	NA
	rs2968426	G	0.00870931	0.00199781	0.0986459	0.0358473	0.00718289	0.884	NA
	rs33951980	C	0.0134732	0.00257259	0.16839	0.0463384	0.0219179	0.034	*
	rs34452566	G	-0.0109889	0.00216644	-0.0552252	0.0389718	0.00136017	1	NA
	rs34783010	G	0.0114009	0.00220655	0.0817156	0.038982	0.00400101	1	NA
	rs40465	T	-0.00937584	0.00185473	-0.00863665	0.0329377	6.03667e-05	1	NA
	rs4410790	T	0.0126236	0.0018047	-0.0877948	0.0320972	0.0129789	0.017	*
	rs4442732	A	-0.00860072	0.00179792	0.0462674	0.0320264	0.00387629	1	NA
	rs4788415	T	-0.0140159	0.00301521	-0.157809	0.0536022	0.0184269	0.646	NA
	rs55807911	T	-0.010848	0.0022936	-0.0535718	0.0406477	0.00125117	1	NA
	rs5760425	T	0.0083965	0.00178378	-0.0560865	0.0317784	0.00516265	1	NA
	rs643428	C	0.00752158	0.00178845	-0.0329527	0.0317787	0.00217359	1	NA
	rs7072776	A	0.0121008	0.00195059	0.124796	0.0346743	0.0114394	0.051	*
	rs7140993	G	0.0100645	0.00199031	0.0589016	0.0353337	0.00178755	1	NA
	rs72634682	G	-0.0113426	0.0025024	0.0939848	0.0454381	0.0133128	0.595	NA
	rs7334078	T	0.0104682	0.00193658	0.0217544	0.0344426	1.36019e-05	1	NA
	rs7442885	C	0.00964743	0.00212906	0.176262	0.0378077	0.0262695	<0.017	*
	rs7619139	T	-0.00774303	0.00176905	-0.0231508	0.0315821	9.74143e-05	1	NA
	rs784257	T	-0.00917972	0.00225514	0.0331428	0.0397454	0.00246969	1	NA
	rs7924036	G	0.00947624	0.00173951	0.159562	0.0309905	0.0214422	<0.017	*
	rs816366	C	0.0094214	0.00187207	0.0226366	0.0335639	4.12802e-05	1	NA
	rs838133	A	-0.0131796	0.00179511	0.083112	0.0321942	0.0121923	0.051	*
	rs9387963	G	-0.00772329	0.00175426	-0.169901	0.031208	0.0252349	<0.017	*
	rs9537160	C	0.00758467	0.00194508	-0.0741252	0.0347402	0.00779482	0.833	NA
CVD	SNP	A1	Beta_exposure	SE_exposure	Beta_outcome	SE_outcome	Outlier.Test.RSSobs	Outlier.Test.Pvalue	Significant
	rs10136360	G	-0.00957388	0.00149765	-0.023502	0.0122402	0.000435817	1	NA
	rs1036336	A	0.00729244	0.00123823	-0.004086	0.0095984	3.49274e-06	1	NA
	rs10457480	G	-0.0083187	0.00134796	-0.010857	0.0106032	0.000185709	1	NA
	rs11584700	A	0.00898544	0.00152048	-0.017825	0.0109508	0.000438653	1	NA
	rs11642015	G	-0.0124196	0.0012606	-0.030049	0.009619	0.000749231	0.25	NA
	rs11646118	A	0.013771	0.00219753	-0.008639	0.0204687	0.000169647	1	NA
	rs117287096	G	-0.0281939	0.00418133	0.006367	0.0398555	5.46996e-06	1	NA
	rs1229984	A	0.0241902	0.00380397	0.033254	0.0186481	0.00180563	1	NA
	rs12581220	G	0.01034	0.00133913	-0.004512	0.010387	6.22562e-05	1	NA
	rs1260326	A	0.0117743	0.00126163	0.003257	0.0096201	5.11109e-05	1	NA
	rs13163314	G	0.0100176	0.00146711	0.006838	0.0109117	1.47173e-05	1	NA
	rs141086701	G	0.0449508	0.00734433	0.044609	0.0483741	0.00098957	1	NA
	rs1437971	A	0.00847493	0.00131191	-0.014181	0.010715	0.000138239	1	NA
	rs1513481	G	-0.00933683	0.00134101	-0.00709	0.0108856	1.84555e-05	1	NA
	rs1516187	A	-0.0115549	0.00183414	9.1e-05	0.0153611	1.2354e-05	1	NA
	rs1562308	A	-0.00801334	0.0012631	-0.005261	0.0097037	6.18043e-05	1	NA
	rs16850592	A	0.00931811	0.00144861	0.018695	0.0111224	0.000259571	1	NA
	rs17123039	A	0.00725318	0.00125576	-0.005328	0.0096538	5.88095e-05	1	NA
	rs17635778	G	0.00974302	0.00163968	-0.006896	0.0132548	0.000100608	1	NA
	rs1957111	G	-0.018951	0.00278568	-0.022259	0.0213758	0.000280815	1	NA
	rs1996928	G	0.00904149	0.00142159	0.016428	0.0105532	0.000193255	1	NA
	rs2021807	A	0.00865748	0.00132848	0.003395	0.0103262	5.53325e-07	1	NA
	rs2393831	A	0.00928993	0.00148858	-0.006307	0.0104695	8.74347e-05	1	NA
	rs2422137	G	0.00750123	0.00124279	-0.004558	0.0094311	4.86814e-05	1	NA
	rs2472297	G	0.0138093	0.0014017	0.002971	0.012918	1.73302e-06	1	NA
	rs2504671	G	0.0125233	0.00146135	0.011622	0.0107227	6.46962e-05	1	NA
	rs2761589	G	-0.00897032	0.00128298	-0.003733	0.0095658	9.88846e-07	1	NA
	rs2945091	G	0.00716434	0.0012451	-0.016405	0.0094398	0.000356557	1	NA
	rs2968426	G	0.00822175	0.00142492	-0.00655	0.0122586	1.65301e-05	1	NA
	rs33951980	G	0.0131522	0.00183904	-0.006967	0.0149754	0.000126155	1	NA
	rs34452566	G	-0.00972968	0.00154781	-0.000743	0.0142465	5.18876e-06	1	NA
	rs34783010	G	0.0134311	0.00156083	0.03894	0.0125617	0.00128413	0.3	NA
	rs40465	A	-0.00832914	0.00131672	-0.007977	0.0101773	3.03197e-05	1	NA
	rs4410790	A	0.0108651	0.00128176	-0.027305	0.0096635	0.0010019	0.0333333	*
	rs4442732	A	-0.00779507	0.0012767	-0.01265	0.0095223	0.000108711	1	NA
	rs4788415	A	-0.0148019	0.00214015	0.000146	0.0196214	2.0008e-05	1	NA
	rs55807911	A	-0.0101316	0.00162751	-0.005194	0.0132602	4.43927e-06	1	NA
	rs5760425	A	0.00745825	0.00126653	-0.006253	0.0093442	1.61772e-05	1	NA
	rs643428	G	0.00768192	0.00127171	-0.002234	0.0098362	1.74411e-08	1	NA
	rs7072776	A	0.0103876	0.00138554	0.00076	0.0105956	1.64388e-05	1	NA
	rs7140993	G	0.00933716	0.00141075	0.016616	0.0104804	0.000196613	1	NA
	rs72634682	G	-0.0102914	0.00179502	0.000123	0.0131244	1.11666e-05	1	NA
	rs7334078	A	0.0090649	0.00137467	-0.002441	0.0104141	2.84305e-05	1	NA
	rs7442885	G	0.00905755	0.00151146	0.017618	0.0110235	0.000227594	1	NA
	rs784257	A	-0.0105962	0.00159303	0.017966	0.0126388	0.000224076	1	NA
	rs7924036	G	0.00833585	0.00123695	-0.006085	0.0091867	7.80181e-05	1	NA
	rs816366	G	0.00987744	0.00133491	-0.007674	0.0106596	2.24331e-05	1	NA
	rs838133	A	-0.0133353	0.00127931	0.000168	0.0115732	1.65769e-05	1	NA
	rs9387963	G	-0.00819859	0.00124605	-0.002452	0.0094702	2.5709e-05	1	NA
	rs9537160	G	0.00877585	0.00138362	0.00156	0.0101154	1.35176e-06	1	NA
