# Supplementary material for: GWAS for urinary sodium and potassium excretion highlights pathways shared with cardiovascular traits
Source: Nat Commun. 2019 Aug 13;10:3653. doi: 10.1038/s41467-019-11451-y (PMC6692500; doi:10.1038/s41467-019-11451-y)
Supplement: Supplementary file 23 — Supplementary Dataset 23 [file 41467_2019_11451_MOESM23_ESM.xlsx]

## Sheet: Supplementary Data 23
	Supplementary Data 23: Outlier test and effect estimates of urinary potassium loci used for Mendelian randomization analysis.
SBP	SNP	A1	Beta_exposure	SE_exposure	Beta_outcome	SE_outcome	Outlier.Test.RSSobs	Outlier.Test.Pvalue	Significant
	rs10854166	A	0.00709045	0.00170647	-0.120829	0.054186	0.00240791	1	NA
	rs12944041	G	0.00608078	0.00169837	-0.12461	0.0537002	0.00402118	1	NA
	rs13143189	G	0.0101887	0.00171238	-0.0102547	0.0541094	0.012558	0.918667	NA
	rs2122127	A	0.00682543	0.00172963	-0.131085	0.0544872	0.00392563	1	NA
	rs2472297	C	0.0110201	0.00189436	0.0770543	0.0609597	0.0484364	0.039	*
	rs254023	T	-0.00804012	0.00169765	0.128188	0.0535328	0.00223128	1	NA
	rs4410790	T	0.00826611	0.00174803	-0.142285	0.0551768	0.00359855	1	NA
	rs4973766	C	0.00720104	0.00169246	-0.24409	0.0534503	0.0324615	0.0303333	*
	rs61375854	T	-0.00720657	0.00178808	0.057549	0.0566074	0.000389499	1	NA
	rs6467447	C	0.00655552	0.00174821	-0.13121	0.0551472	0.00427872	1	NA
	rs72704791	A	0.011313	0.0021376	0.0749338	0.0676368	0.0470396	0.0563333	*
	rs7319172	G	-0.00755971	0.0017006	0.114804	0.0539315	0.00142304	1	NA
	rs784257	T	-0.00834194	0.00218385	0.167537	0.0683435	0.00707157	1	NA
DBP	SNP	A1	Beta_exposure	SE_exposure	Beta_outcome	SE_outcome	Outlier.Test.RSSobs	Outlier.Test.Pvalue	Significant
	rs10854166	A	0.00709045	0.00170647	0.0125676	0.0315091	NA	NA	NA
	rs12944041	G	0.00608078	0.00169837	-0.0516266	0.0312402	NA	NA	NA
	rs13143189	G	0.0101887	0.00171238	-0.0300446	0.0314722	NA	NA	NA
	rs2122127	A	0.00682543	0.00172963	-0.024504	0.0316829	NA	NA	NA
	rs2472297	C	0.0110201	0.00189436	0.0621842	0.0354369	NA	NA	NA
	rs254023	T	-0.00804012	0.00169765	0.000114001	0.0311427	NA	NA	NA
	rs4410790	T	0.00826611	0.00174803	-0.0877948	0.0320972	NA	NA	NA
	rs4973766	C	0.00720104	0.00169246	-0.0532757	0.0310773	NA	NA	NA
	rs61375854	T	-0.00720657	0.00178808	0.00788181	0.0329136	NA	NA	NA
	rs6467447	C	0.00655552	0.00174821	-0.0226788	0.0320799	NA	NA	NA
	rs72704791	A	0.011313	0.0021376	0.0182507	0.0393476	NA	NA	NA
	rs7319172	G	-0.00755971	0.0017006	0.047873	0.0313626	NA	NA	NA
	rs784257	T	-0.00834194	0.00218385	0.0331428	0.0397454	NA	NA	NA
CVD	SNP	A1	Beta_exposure	SE_exposure	Beta_outcome	SE_outcome	Outlier.Test.RSSobs	Outlier.Test.Pvalue	Significant
	rs10854166	A	0.00752479	0.00121538	0.016691	0.0094984	NA	NA	NA
	rs12944041	G	0.00700048	0.00120774	0.005263	0.0096603	NA	NA	NA
	rs13143189	G	0.0109685	0.00121798	0.013038	0.0115308	NA	NA	NA
	rs2122127	A	0.00716293	0.0012294	-0.001368	0.009632	NA	NA	NA
	rs2472297	G	0.0106514	0.00135803	0.002971	0.012918	NA	NA	NA
	rs254023	A	-0.007873	0.00120633	-0.004	0.0094224	NA	NA	NA
	rs4410790	A	0.00874545	0.00124235	-0.027305	0.0096635	NA	NA	NA
	rs4973766	G	0.00836621	0.0012037	0.002508	0.0094061	NA	NA	NA
	rs61375854	A	-0.00752992	0.00127228	0.001516	0.009619	NA	NA	NA
	rs6467447	G	0.00720042	0.00124211	0.001852	0.0097711	NA	NA	NA
	rs72704791	A	0.0106017	0.00152158	-0.000568	0.0139337	NA	NA	NA
	rs784257	A	-0.00890228	0.00154365	0.017966	0.0126388	NA	NA	NA
