# Supplementary material for: GWAS for urinary sodium and potassium excretion highlights pathways shared with cardiovascular traits
Source: Nat Commun. 2019 Aug 13;10:3653. doi: 10.1038/s41467-019-11451-y (PMC6692500; doi:10.1038/s41467-019-11451-y)
Supplement: Supplementary file 24 — Supplementary Dataset 24 [file 41467_2019_11451_MOESM24_ESM.xlsx]

## Sheet: Supplementary Data 24
	Supplementary Data 24: Mendelian Randomization analysis for the potential causal effect of urinary sodium on BP and CVD using UK Biobank north vs. south & midland (at P<0.008).
	Main analysis						Sensitivity analysis after outliers were removed					Sensitivity analysis using random split samples of UKB
	Method*	Estimate	Std Error	95% CI		P-value	Estimate	Std Error	95% CI		P-value	Estimate	Std Error	95% CI		P-value
SBP	Simple median	4.28452	1.76342	0.828287	7.74076	0.0151126	4.12755	1.78861	0.62194	7.63316	0.0210166	3.41679	1.85508	-0.219111	7.05268	0.0654971
	Weighted median	4.44832	1.70579	1.10503	7.7916	0.00911334	4.46207	1.702	1.12622	7.79792	0.00875006	4.48085	1.84496	0.864801	8.09691	0.015153
	IVW	1.84275	2.08533	-2.24443	5.92993	0.376873	1.7083	1.63921	-1.50449	4.92109	0.297343	1.65251	1.75745	-1.79203	5.09706	0.347069
	MR-Egger	-4.11447	7.22635	-18.2778	10.0489	0.569105	8.70439	5.52689	-2.12811	19.5369	0.115276	9.10975	6.7201	-4.0614	22.2809	0.175227
	(intercept)	0.0644106	0.0747911	-0.0821773	0.210999	0.389124	-0.0730766	0.0551819	-0.181231	0.0350779	0.185408	-0.0764892	0.0665516	-0.206928	0.0539497	0.250424
	IVW_fixed_effect	1.84275	0.843966	0.188608	3.49689	0.0290033	1.7083	0.983983	-0.220273	3.63687	0.0825451	1.65251	1.04663	-0.398839	3.70387	0.11436
	Heterogeneity statistics	305.261	P value heterogeneity test	2.52208e-38	N SNPs :	51	111.008	P value heterogeneity test	1.34366e-08	N SNPs after outliers removed:	41	98.6849	P value heterogeneity test	5.58538e-08	N SNPs after outliers removed:	36
	I2 (IVW)	0.836206					0.639665					0.645336
	I2 (Egger)	0.17					0.05					0
	Method	Estimate	Std Error	95% CI		P-value	Estimate	Std Error	95% CI		P-value	Estimate	Std Error	95% CI		P-value
DBP	Simple median	2.91855	1.03987	0.880438	4.95667	0.0050061	2.91855	1.04137	0.8775	4.95961	0.00506923	3.01251	1.07728	0.901086	5.12394	0.00516739
	Weighted median	2.14935	1.00536	0.17889	4.11981	0.0325248	2.36814	1.01328	0.382147	4.35414	0.0194339	3.97221	1.04585	1.92238	6.02204	0.000145828
	IVW	1.73367	1.26503	-0.74575	4.21309	0.170545	2.26053	0.927441	0.442778	4.07828	0.014794	3.24621	1.06801	1.15296	5.33947	0.00236969
	MR-Egger	1.24529	4.41596	-7.40984	9.90041	0.777946	5.3715	3.10047	-0.705314	11.4483	0.0831885	9.37208	3.35845	2.78963	15.9545	0.00526118
	(intercept)	0.00528038	0.0457031	-0.084296	0.0948568	0.90802	-0.0327751	0.0311733	-0.0938736	0.0283235	0.293083	-0.0634697	0.0331253	-0.128394	0.00145471	0.0553589
	IVW_fixed_effect	1.73367	0.490805	0.771708	2.69563	0.000411971	2.26053	0.603526	1.07764	3.44342	0.000180009	3.24621	0.631297	2.00889	4.48353	2.71641e-07
	Heterogeneity statistics	332.166	P value heterogeneity test	2.71304e-43	N SNPs :	51	85.0125	P value heterogeneity test	7.65913e-06	N SNPs after outliers removed:	37	97.3106	P value heterogeneity test	5.12809e-08	N SNPs after outliers removed:	35
	I2 (IVW)	0.849473					0.576533					0.650603
	I2 (Egger)	0.17					0.09					0
	Method	Estimate	Std Error	95% CI		P-value	Estimate	Std Error	95% CI		P-value
CVD Nikpay et al.	Simple median	0.220487	0.237757	-0.245509	0.686483	0.353739	0.225829	0.240696	-0.245926	0.697584	0.348124
	Weighted median	0.21558	0.238268	-0.251418	0.682578	0.365583	0.2238	0.236911	-0.240537	0.688136	0.344833
	IVW	0.307741	0.178609	-0.042327	0.657809	0.0848915	0.40016	0.167403	0.0720567	0.728264	0.0168299
	MR-Egger	0.503519	0.679419	-0.828117	1.83515	0.458631	0.646763	0.627942	-0.583981	1.87751	0.303023
	(intercept)	-0.00203942	0.0068238	-0.0154138	0.011335	0.76504	-0.0025654	0.00629181	-0.0148971	0.00976631	0.683467
	IVW_fixed_effect	0.307741	0.158414	-0.00274397	0.618226	0.0520594	0.40016	0.160988	0.08463	0.715691	0.0129313
	Heterogeneity statistics	62.2902	P value heterogeneity test	0.0962296	N SNPs :	50	51.9017	P value heterogeneity test	0.324351	N SNPs after outliers removed:	49
	I2 (IVW)	0.213359					0.075174
	I2 (Egger)	0.27					0.24
	Method	Estimate	Std Error	95% CI		P-value
CVD_Nelson et al.	Simple median	0.38494	0.210447	-0.0275292	0.797409	0.067377
	Weighted median	0.40642	0.210724	-0.00659258	0.819432	0.0537708
	IVW	0.51178	0.16398	0.190386	0.833175	0.00180241
	MR-Egger	1.28644	0.6745	-0.0355541	2.60844	0.0564879
	(intercept)	-0.0079113	0.00668343	-0.0210106	0.00518799	0.236525
	IVW_fixed_effect	0.51178	0.14031	0.236777	0.786784	0.000264819
	Heterogeneity statistics	66.9263	P value heterogeneity test	0.0452002	N SNPs :	50
	I2 (IVW)	0.267852
	I2 (Egger)	0.53
	* Heterogeneity test statistics refers to Q value that is calculated using MendelianRandomization package for inverse variant weighting test. I2 value however is calculated for MR-Egger test using the same package .
