# Supplementary material for: GWAS for urinary sodium and potassium excretion highlights pathways shared with cardiovascular traits
Source: Nat Commun. 2019 Aug 13;10:3653. doi: 10.1038/s41467-019-11451-y (PMC6692500; doi:10.1038/s41467-019-11451-y)
Supplement: Supplementary file 25 — Supplementary Dataset 25 [file 41467_2019_11451_MOESM25_ESM.xlsx]

## Sheet: Supplementary Data 25
	Supplementary Data 25: Mendelian Randomization analysis for the potential causal effect of urinary potassium on BP and CVD using UK Biobank north vs. south & midland (at P<0.008).
	Main analysis						Sensitivity analysis after outliers were removed					Sensitivity analysis using random split samples of UKB
	Method*	Estimate	Std Error	95% CI		P-value	Estimate	Std Error	95% CI		P-value	Estimate	Std Error	95% CI		P-value
SBP	Simple median	-17.0411	3.39784	-23.7007	-10.3814	5.2959e-07	-17.1271	3.39446	-23.7801	-10.4741	4.52096e-07	-11.8612	3.28926	-18.308	-5.41438	0.000310902
	Weighted median	-15.6438	3.23704	-21.9882	-9.29929	1.34667e-06	-16.6571	3.38857	-23.2986	-10.0156	8.84765e-07	-11.6524	3.25504	-18.0321	-5.27262	0.000343861
	IVW	-10.5597	3.48842	-17.3969	-3.72252	0.00246935	-13.8624	2.30096	-18.3722	-9.35261	1.695e-09	-9.78442	3.05	-15.7623	-3.80653	0.00133657
	MR-Egger	42.1825	10.2753	22.0434	62.3217	4.03881e-05	20.6778	15.5826	-9.86363	51.2192	0.184517	14.0011	11.938	-9.39692	37.3991	0.240869
	(intercept)	-0.436853	0.0835585	-0.600625	-0.273082	1.71251e-07	-0.268008	0.1196	-0.50242	-0.0335969	0.0250342	-0.205949	0.100841	-0.403594	-0.00830502	0.0411196
	IVW_fixed_effect	-10.5597	1.92527	-14.3331	-6.78623	4.13953e-08	-13.8624	2.28827	-18.3473	-9.37747	1.37806e-09	-9.78442	2.06715	-13.836	-5.73288	2.20915e-06
	Heterogeneity statistics	39.3964	P value heterogeneity test	9.05216e-05	N SNPs :	13	9.10005	P value heterogeneity test	0.42809	N SNPs after outliers removed:	10	19.5928	P value heterogeneity test	0.0205985	N SNPs after outliers removed:	10
	I2 (IVW)	69.5403					0.0109946					0.540648
	I2 (Egger)	zero					zero					0.15
	Method	Estimate	Std Error	95% CI		P-value		No outliers				Estimate	Std Error	95% CI		P-value
DBP	Simple median	-3.4595	1.74334	-6.87639	-0.0426071	0.0472108						-2.65757	1.90688	-6.39499	1.07984	0.163415
	Weighted median	-2.96143	1.66754	-6.22975	0.306882	0.0757443						-2.77485	1.74767	-6.20022	0.650521	0.112345
	IVW	-2.34566	1.34473	-4.98129	0.289975	0.0811022						-2.6984	1.30071	-5.24775	-0.149056	0.0380274
	MR-Egger	10.7642	6.20212	-1.39179	22.9201	0.0826418						-2.47164	5.88414	-14.0043	9.06107	0.674448
	(intercept)	-0.108587	0.050436	-0.207439	-0.00973383	0.031322						-0.0020626	0.0520057	-0.103992	0.0998667	0.968363
	IVW_fixed_effect	-2.34566	1.11969	-4.54021	-0.151099	0.0361789						-2.6984	1.21913	-5.08784	-0.30896	0.0268707
	Heterogeneity statistics	17.3084	P value heterogeneity test	0.13836	N SNPs :	13						9.10657	P value heterogeneity test	0.333386	N SNPs after outliers removed:	9
	I2 (IVW)	0.306695										0.121513
	I2 (Egger)	zero										0.22
	Method	Estimate	Std Error	95% CI		P-value
CVD Nikpay et al.	Simple median	0.289354	0.476955	-0.645461	1.22417	0.544071
	Weighted median	0.292198	0.482981	-0.654427	1.23882	0.545186
	IVW	0.215643	0.413	-0.593822	1.02511	0.601574
	MR-Egger	0.326746	2.87186	-5.302	5.95549	0.909416
	(intercept)	-0.000939441	0.0240055	-0.0479893	0.0461104	0.968783
	IVW_fixed_effect	0.215643	0.357378	-0.484806	0.916092	0.546241
	Heterogeneity statistics	14.6905	P value heterogeneity test	0.197109	N SNPs :	12
	I2 (IVW)	0.251216
	I2 (Egger)	zero
	Method	Estimate	Std Error	95% CI		P-value
CVD_Nelson et al.	Simple median	-0.0951372	0.425417	-0.928939	0.738664	0.823043
	Weighted median	-0.0374973	0.433049	-0.886258	0.811264	0.930998
	IVW	0.0692713	0.375764	-0.667213	0.805756	0.853741
	MR-Egger	0.112193	2.55126	-4.88819	5.11258	0.964924
	(intercept)	-0.000365555	0.0214679	-0.0424418	0.0417107	0.986414
	IVW_fixed_effect	0.0692713	0.308392	-0.535166	0.673709	0.822274
	Heterogeneity statistics	16.3311	P value heterogeneity test	0.129276	N SNPs :	12
	I2 (IVW)	0.32644
	I2 (Egger)	zero
	* Heterogeneity test statistics refers to Q value that is calculated using MendelianRandomization package for inverse variant weighting test. I2 value however is calculated for MR-Egger test using the same package .
