# Supplementary material for: GWAS for urinary sodium and potassium excretion highlights pathways shared with cardiovascular traits
Source: Nat Commun. 2019 Aug 13;10:3653. doi: 10.1038/s41467-019-11451-y (PMC6692500; doi:10.1038/s41467-019-11451-y)
Supplement: Supplementary file 26 — Supplementary Dataset 26 [file 41467_2019_11451_MOESM26_ESM.xlsx]

## Sheet: Supplementary Data 26
Supplementary Data 26: Mendelian Randomization analysis for the potential causal effect of urinary sodium on BP using UK Biobank north vs. south & midland and on CVD using CARDIOGRAM. Focusing on loci involved in significant biologic functions.
Behaviour pathway
SBP
Method	Estimate	Std Error	95% CI		P-value	SNPs included
Simple median	7.38835	3.37595	0.771616	14.0051	0.0286313	rs34452566 rs9387963 rs11642015 rs16850592 rs1513481 rs784257 rs10136360 rs11584700 rs117287096 rs13163314 rs1437971 rs17635778 rs2422137
Weighted median	7.37901	3.26203	0.985554	13.7725	0.0236916
IVW	9.77495	3.57516	2.76778	16.7821	0.00625447
MR-Egger	0.617924	12.7238	-24.3202	25.556	0.961266
(intercept)	0.0943286	0.125586	-0.151816	0.340474	0.452589
IVW_fixed_effect	9.77495	1.76343	6.3187	13.2312	2.9706e-08
Heterogeneity statistics	49.3238	P value heterogeneity test	1.83581e-06	N SNPs :	13
I2	0
DBP
Method	Estimate	Std Error	95% CI		P-value
Simple median	5.02554	2.14681	0.817867	9.23322	0.0192357
Weighted median	5.99683	1.97123	2.1333	9.86037	0.00234871
IVW	6.34294	2.10417	2.21885	10.467	0.00257433
MR-Egger	0.836675	7.4792	-13.8223	15.4956	0.910929
(intercept)	0.0567167	0.0738147	-0.0879575	0.201391	0.44227
IVW_fixed_effect	6.34294	1.02547	4.33306	8.35281	6.19e-10
Heterogeneity statistics	50.5241	P value heterogeneity test	1.12994e-06	N SNPs :	13
I2	0
CVD (Nikpay et al.)
Method	Estimate	Std Error	95% CI		P-value
Simple median	0.682599	0.510674	-0.318305	1.6835	0.181333
Weighted median	0.754684	0.487384	-0.200571	1.70994	0.121517
IVW	0.861143	0.388328	0.100035	1.62225	0.0265842
MR-Egger	3.00711	1.86259	-0.643489	6.65772	0.106423
(intercept)	-0.0213843	0.0181654	-0.0569878	0.0142192	0.239116
IVW_fixed_effect	0.861143	0.325296	0.223575	1.49871	0.00811463
Heterogeneity statistics	17.101	P value heterogeneity test	0.145838	N SNPs :	13
I2	0.29642
Thermoregulation pathway
SBP
Method	Estimate	Std Error	95% CI		P-value	SNPs included
Simple median	5.92154	6.24358	-6.31565	18.1587	0.342915	rs34452566 rs9387963 rs11642015 rs1036336 rs33951980
Weighted median	13.8993	4.45711	5.16355	22.6351	0.00181798
IVW	15.6967	5.45281	5.0094	26.384	0.00399386
MR-Egger	15.044	17.6915	-19.6307	49.7186	0.39513
(intercept)	0.00664093	0.168213	-0.32305	0.336332	0.968508
IVW_fixed_effect	15.6967	2.79058	10.2273	21.1661	1.85638e-08
Heterogeneity statistics	15.2725	P value heterogeneity test	0.00416818	N SNPs :	5
I2	0.60259
DBP
Method	Estimate	Std Error	95% CI		P-value
Simple median	12.4981	2.97193	6.67327	18.323	2.60624e-05
Weighted median	12.5495	2.60012	7.45333	17.6456	1.38951e-06
IVW	12.2606	2.62843	7.10896	17.4122	3.09203e-06
MR-Egger	10.849	8.48439	-5.78012	27.4781	0.201003
(intercept)	0.0143603	0.0806627	-0.143736	0.172456	0.8587
IVW_fixed_effect	12.2606	1.62307	9.07942	15.4417	4.22285e-14
Heterogeneity statistics	10.49	P value heterogeneity test	0.0329347	N SNPs :	5
I2	0.602345
CVD (Nikpay et al.)
Method	Estimate	Std Error	95% CI		P-value
Simple median	0.0763643	0.777144	-1.44681	1.59954	0.921724
Weighted median	0.411849	0.698055	-0.956314	1.78001	0.555194
IVW	0.88851	0.637816	-0.361587	2.13861	0.163605
MR-Egger	3.14443	2.93159	-2.60139	8.89025	0.28345
(intercept)	-0.0232046	0.0293565	-0.0807423	0.0343331	0.42927
IVW_fixed_effect	0.88851	0.486128	-0.0642843	1.8413	0.0675906
Heterogeneity statistics	6.88571	P value heterogeneity test	0.142052	N SNPs :	5
I2	0.714496
Weight loss pathway
SBP
Method	Estimate	Std Error	95% CI		P-value	SNPs included
Simple median	4.59285	3.46371	-2.1959	11.3816	0.184842	rs34452566 rs9387963 rs16850592 rs4410790 rs12581220 rs2472297
Weighted median	4.45065	3.24166	-1.90288	10.8042	0.169766
IVW	1.3701	5.4671	-9.34521	12.0854	0.802117
MR-Egger	-22.2691	22.1242	-65.6318	21.0936	0.314151
(intercept)	0.276319	0.250922	-0.215479	0.768117	0.270803
IVW_fixed_effect	1.3701	2.12254	-2.79001	5.53021	0.518603
Heterogeneity statistics	33.1719	P value heterogeneity test	3.4789e-06	N SNPs :	6
I2	0.57901
DBP
Method	Estimate	Std Error	95% CI		P-value
Simple median	4.46232	2.04292	0.458266	8.46637	0.0289415
Weighted median	2.49903	1.9129	-1.25018	6.24825	0.191413
IVW	2.75459	3.71573	-4.5281	10.0373	0.458491
MR-Egger	-17.2155	13.7337	-44.1331	9.70206	0.210015
(intercept)	0.233439	0.155764	-0.0718536	0.538731	0.13396
IVW_fixed_effect	2.75459	1.23432	0.335374	5.17381	0.0256367
Heterogeneity statistics	45.3109	P value heterogeneity test	1.25431e-08	N SNPs :	6
I2	0.5792
CVD (Nikpay et al.)
Method	Estimate	Std Error	95% CI		P-value
Simple median	-0.111356	0.598292	-1.28399	1.06127	0.852348
Weighted median	-0.281806	0.607343	-1.47218	0.908565	0.642649
IVW	-0.403309	0.621187	-1.62081	0.814196	0.516173
MR-Egger	-1.65083	4.31254	-10.1032	6.8016	0.70187
(intercept)	0.0130124	0.0444079	-0.0740254	0.10005	0.769507
IVW_fixed_effect	-0.403309	0.433732	-1.25341	0.446791	0.352445
Heterogeneity statistics	10.2559	P value heterogeneity test	0.068302	N SNPs :	6
I2	0.496451
Congenital kidney disorders pathway
SBP
Method	Estimate	Std Error	95% CI		P-value	SNPs included
Simple median	-7.99003	5.68173	-19.126	3.14595	0.159645	rs1513481 rs784257 rs1229984 rs2504671
Weighted median	-7.12737	5.27422	-17.4647	3.20991	0.17658
IVW	-10.0665	12.1699	-33.919	13.786	0.408142
MR-Egger	-42.6019	28.0629	-97.6042	12.4005	0.128993
(intercept)	0.412338	0.326554	-0.227695	1.05237	0.206698
IVW_fixed_effect	-10.0665	3.02416	-15.9938	-4.13927	0.000872523
Heterogeneity statistics	48.583	P value heterogeneity test	1.6003e-10	N SNPs :	4
I2	0
DBP
Method	Estimate	Std Error	95% CI		P-value
Simple median	-1.16665	2.80457	-6.6635	4.33021	0.677425
Weighted median	-0.957287	2.70372	-6.25647	4.3419	0.723291
IVW	-0.266649	3.90865	-7.92747	7.39417	0.94561
MR-Egger	-8.59104	10.2444	-28.6696	11.4875	0.401687
(intercept)	0.105488	0.119199	-0.128137	0.339114	0.376169
IVW_fixed_effect	-0.266649	1.7586	-3.71344	3.18014	0.879482
Heterogeneity statistics	14.8198	P value heterogeneity test	0.00197728	N SNPs :	4
I2	0
CVD (Nikpay et al.)
Method	Estimate	Std Error	95% CI		P-value
Simple median	0.843694	0.662874	-0.455515	2.1429	0.203095
Weighted median	0.790223	0.675331	-0.533401	2.11385	0.24195
IVW	0.156752	0.705073	-1.22517	1.53867	0.824065
MR-Egger	-2.97747	1.41529	-5.75138	-0.203564	0.0353962
(intercept)	0.0434413	0.0184924	0.00719688	0.0796856	0.0188166
IVW_fixed_effect	0.156752	0.472174	-0.768693	1.0822	0.739905
Heterogeneity statistics	6.68937	P value heterogeneity test	0.0824862	N SNPs :	4
I2	0.54296
