# Supplementary material for: GWAS for urinary sodium and potassium excretion highlights pathways shared with cardiovascular traits
Source: Nat Commun. 2019 Aug 13;10:3653. doi: 10.1038/s41467-019-11451-y (PMC6692500; doi:10.1038/s41467-019-11451-y)
Supplement: Supplementary file 27 — Supplementary Dataset 27 [file 41467_2019_11451_MOESM27_ESM.xlsx]

## Sheet: Supplementary Data 27
Supplementary Data 27: Summary of association results for urinary sodium SNPs among African and Asian ancestries (P<9.8×10-4).
African ancestry
SNP	Lead_SNP	N	CHR	BP	GENPOS	ALLELE1	ALLELE0	A1FREQ	INFO	CHISQ_LINREG	P_LINREG	BETA	SE	CHISQ_BOLT_LMM_INF	P_BOLT_LMM_INF
rs163882	rs2761589	7612	11	30947681	0	C	G	0.084339	0.993507	10.9248	0.00095	0.0580403	0.0170353	11.6081	0.00066
rs163883	rs2761590	7612	11	30947248	0	A	G	0.0841085	0.993587	10.6017	0.0011	0.0572547	0.0170445	11.2838	0.00078
rs163854	rs2761591	7612	11	30964632	0	G	T	0.0843176	0.989874	10.5387	0.0012	0.0571996	0.0170607	11.2407	0.0008
rs163874	rs2761592	7612	11	30970207	0	C	T	0.0842036	0.989358	10.3354	0.0013	0.0566215	0.0170716	11.0006	0.00091
Asian ancestry
SNP	Lead_SNP	N	CHR	BP	GENPOS	ALLELE1	ALLELE0	A1FREQ	INFO	CHISQ_LINREG	P_LINREG	BETA	SE	CHISQ_BOLT_LMM_INF	P_BOLT_LMM_INF
rs1907067	rs10457480	10095	6	126837663	0	A	C	0.33838	0.999516	10.1185	0.0015	0.0321174	0.00890927	12.9956	0.00031
rs1490388	rs10457481	10095	6	126835655	0	C	T	0.339673	1	9.97386	0.0016	0.031795	0.00888194	12.8145	0.00034
rs2130603	rs10457482	10095	6	126826819	0	A	C	0.338448	0.999627	9.78779	0.0018	0.0315423	0.00890093	12.5579	0.00039
rs4053271	rs10457483	10095	6	126830512	0	T	C	0.338826	0.999916	9.78516	0.0018	0.0315854	0.00890228	12.5884	0.00039
rs1490387	rs10457484	10095	6	126834083	0	C	A	0.338835	0.999912	9.78038	0.0018	0.0315785	0.00890211	12.5833	0.00039
rs9375446	rs10457485	10095	6	126835015	0	G	A	0.338834	0.999963	9.77846	0.0018	0.0315763	0.00890212	12.5816	0.00039
rs4559102	rs10457486	10095	6	126773580	0	G	A	0.340262	0.999111	9.79428	0.0018	0.0315444	0.00890465	12.5491	0.0004
rs9372840	rs10457487	10095	6	126822635	0	A	C	0.338476	0.9997	9.757	0.0018	0.0314951	0.00890042	12.5217	0.0004
rs9375441	rs10457488	10095	6	126778600	0	G	A	0.340352	0.999213	9.72277	0.0018	0.0314455	0.00890577	12.4674	0.00041
rs2184967	rs10457489	10095	6	126773487	0	C	T	0.340366	0.999138	9.71544	0.0018	0.0314372	0.00890553	12.4614	0.00042
rs9388494	rs10457490	10095	6	126776094	0	G	T	0.340477	0.999183	9.70594	0.0018	0.031424	0.00890637	12.4486	0.00042
rs1572569	rs10457491	10095	6	126771687	0	G	A	0.339711	0.998436	9.64856	0.0019	0.031391	0.00890775	12.4186	0.00043
rs4422634	rs10457492	10095	6	126806676	0	T	C	0.340116	0.999283	9.65896	0.0019	0.0313592	0.00890778	12.3934	0.00043
rs9401885	rs10457493	10095	6	126825837	0	C	G	0.33867	0.999956	9.65208	0.0019	0.0313545	0.00890143	12.4074	0.00043
rs4895808	rs10457494	10095	6	126781434	0	C	T	0.340171	0.999301	9.61065	0.0019	0.0312967	0.00890885	12.3411	0.00044
rs9388495	rs10457495	10095	6	126782457	0	G	A	0.339691	0.998279	9.55906	0.002	0.0312936	0.00890813	12.3406	0.00044
rs9398809	rs10457496	10095	6	126789144	0	C	T	0.34018	0.999335	9.61843	0.0019	0.0312991	0.0089076	12.3465	0.00044
rs9385401	rs10457497	10095	6	126789472	0	C	T	0.34018	0.999347	9.61843	0.0019	0.0312991	0.0089076	12.3465	0.00044
rs9398810	rs10457498	10095	6	126815604	0	C	A	0.340026	0.999534	9.65615	0.0019	0.0313053	0.00890559	12.357	0.00044
rs1602278	rs10457499	10095	6	126838605	0	A	C	0.334296	0.99852	9.47235	0.0021	0.0314072	0.00894029	12.3411	0.00044
rs9372839	rs10457500	10095	6	126809870	0	G	A	0.340155	0.999393	9.59167	0.002	0.0312525	0.00890846	12.3073	0.00045
rs7738135	rs10457501	10095	6	126829981	0	G	A	0.338703	0.99995	9.55427	0.002	0.0312266	0.00890156	12.306	0.00045
rs9388496	rs10457502	10095	6	126785062	0	A	G	0.339971	0.999246	9.5694	0.002	0.0312278	0.00890792	12.2894	0.00046
rs4418209	rs10457503	10095	6	126819699	0	T	G	0.339191	0.999488	9.43836	0.0021	0.0311028	0.00891093	12.1829	0.00048
rs9401883	rs10457504	10095	6	126797111	0	A	G	0.340009	0.999151	9.48784	0.0021	0.031061	0.00890664	12.1619	0.00049
rs1844594	rs10457505	10095	6	126788107	0	G	A	0.339567	0.998384	9.34108	0.0022	0.0309503	0.00890746	12.0732	0.00051
rs2050644	rs10457506	10095	6	126805255	0	A	G	0.340066	0.999189	9.38903	0.0022	0.0309352	0.00890746	12.0614	0.00051
rs9375442	rs10457507	10095	6	126803137	0	A	C	0.339323	0.998212	9.33916	0.0022	0.0309034	0.0089096	12.0309	0.00052
rs1120786	rs10457508	10095	6	126808637	0	T	G	0.340008	0.999228	9.32181	0.0023	0.0308451	0.00890821	11.9893	0.00054
rs1159619	rs10457509	10095	6	126801144	0	C	A	0.340748	0.997729	9.21241	0.0024	0.0307523	0.00890873	11.9158	0.00056
rs1337735	rs10457510	10095	6	126771024	0	T	A	0.336616	0.999352	8.95675	0.0028	0.0305123	0.00892933	11.6765	0.00063
rs1361109	rs10457511	10095	6	126771143	0	C	T	0.335975	0.998422	8.88579	0.0029	0.0304529	0.0089317	11.6249	0.00065
rs4897181	rs10457512	10095	6	126753564	0	C	T	0.336061	0.99883	8.92428	0.0028	0.0304344	0.00894048	11.588	0.00066
rs2039735	rs10457513	10095	6	126745076	0	T	C	0.335634	0.998703	8.95814	0.0028	0.0304198	0.00894069	11.5763	0.00067
rs9388486	rs10457514	10095	6	126661154	0	T	C	0.3357	0.996874	8.91586	0.0028	0.03044	0.00896808	11.521	0.00069
rs4565329	rs10457515	10095	6	126752798	0	C	T	0.336166	0.998951	8.85472	0.0029	0.0303349	0.00894127	11.5103	0.00069
rs1538170	rs10457516	10095	6	126752874	0	C	T	0.33617	0.998947	8.85615	0.0029	0.0303383	0.00894135	11.5127	0.00069
rs1538171	rs10457517	10095	6	126752884	0	C	G	0.33617	0.998947	8.85615	0.0029	0.0303383	0.00894135	11.5127	0.00069
rs1578060	rs10457518	10095	6	126712247	0	G	C	0.336111	0.999147	8.90917	0.0028	0.030267	0.00893145	11.484	0.0007
rs1361108	rs10457519	10095	6	126767600	0	C	T	0.336899	1	8.75025	0.0031	0.030154	0.00891706	11.4353	0.00072
rs9321065	rs10457520	10095	6	126744087	0	G	A	0.335552	0.998541	8.77758	0.003	0.0301409	0.00894192	11.3619	0.00075
rs9401881	rs10457521	10095	6	126751921	0	C	T	0.336387	0.998786	8.71731	0.0032	0.0301127	0.00894082	11.3434	0.00076
rs9398808	rs10457522	10095	6	126758791	0	G	T	0.337029	0.999852	8.65991	0.0033	0.0300322	0.00891869	11.3389	0.00076
rs2184968	rs10457523	10095	6	126760994	0	T	C	0.337491	0.998024	8.6779	0.0032	0.0300706	0.00892628	11.3487	0.00076
rs1538172	rs10457524	10095	6	126748493	0	A	G	0.335673	0.99856	8.72966	0.0031	0.0300787	0.00894114	11.317	0.00077
rs4897182	rs10457525	10095	6	126755642	0	T	G	0.335899	0.9988	8.71519	0.0032	0.0300859	0.0089406	11.3238	0.00077
rs9398805	rs10457526	10095	6	126726295	0	C	T	0.335756	0.999158	8.75361	0.0031	0.0299603	0.00893717	11.2381	0.0008
rs9401882	rs10457527	10095	6	126755055	0	A	G	0.33601	0.998934	8.64458	0.0033	0.0299843	0.00894132	11.2456	0.0008
rs4895807	rs10457528	10095	6	126686513	0	C	G	0.335815	0.999372	8.66047	0.0033	0.0298972	0.00892871	11.212	0.00081
rs1415671	rs10457529	10095	6	126759587	0	T	G	0.336737	0.999847	8.54366	0.0035	0.0298109	0.00891851	11.1729	0.00083
rs2152876	rs10457530	10095	6	126761228	0	G	A	0.336731	0.999814	8.5475	0.0035	0.0298181	0.0089186	11.178	0.00083
rs9385400	rs10457531	10095	6	126764190	0	T	G	0.336834	0.999796	8.47726	0.0036	0.0297145	0.00891951	11.0982	0.00086
rs9375439	rs10457532	10095	6	126758540	0	C	G	0.336836	0.999807	8.46775	0.0036	0.0297018	0.00891954	11.0887	0.00087
rs9385399	rs10457533	10095	6	126759033	0	G	T	0.3368	0.999732	8.47061	0.0036	0.0296946	0.00891933	11.0838	0.00087
rs6907898	rs10457534	10095	6	126666416	0	C	T	0.336269	0.998983	8.52527	0.0035	0.0296853	0.00893091	11.0482	0.00089
rs10457478	rs10457535	10095	6	126704934	0	C	G	0.733507	0.999373	11.1638	0.00083	-0.0316086	0.00953343	10.9929	0.00091
rs9401876	rs10457536	10095	6	126669479	0	C	A	0.336248	0.999168	8.47273	0.0036	0.0295874	0.00893121	10.9747	0.00092
rs2027299	rs10457537	10095	6	126685827	0	G	C	0.335592	0.998557	8.46192	0.0036	0.0295964	0.00892732	10.991	0.00092
rs9491624	rs10457538	10095	6	126679106	0	A	T	0.336102	0.999465	8.45582	0.0036	0.0295671	0.00892714	10.9697	0.00093
rs17754780	rs10457539	10095	6	126664333	0	C	T	0.336218	0.998502	8.43537	0.0037	0.0295308	0.00893556	10.9222	0.00095
rs2326387	rs10457540	10095	6	126680489	0	G	A	0.33551	0.998531	8.35133	0.0039	0.0294468	0.00892898	10.8761	0.00097
SNP: rs number, refers to any genome-wide significant variant (P<1×10-9) in the region ; LeadSNP: SNP with strongest association in region (see methods); N: Sample size; CHR: chromosome; BP: physical (base pair) position; GENPOS: genetic position either from bim file or interpolated from genetic map; ALLELE1: first allele in bim file (usually the minor allele), used as the effect allele; ALLELE0:…
